# Supplementary material for: An adaptive method for determining the optimal number of topics in topic modeling
Source: PeerJ journal article supplement (doi:10.7717/peerj-cs.2723), 2025-02-28
Supplement: Code.zip [file ag_news_seanmf.xlsx]

## Sheet: Sheet1
content	type	new_nltk	topic2	topic3	topic4	topic5	topic6	topic7	topic8	topic9	topic10	topic11	topic12	topic13	topic14	topic15	topic16	topic17	topic18	topic19	topic20
Threat to behead Japanese soldierThe group led by wanted terrorist Abu Musab al-Zarqawi has said it has abducted a member of Japan #39;s armed forces and is threatening to behead him if the Japanese government does not withdraw its troops from Iraq within 48 hours.	1	threat behead japanese soldierthe led terrorist abu musab abducted japan armed forces threatening behead japanese government withdraw troops iraq hours	1	0	1	3	4	4	5	7	2	7	8	5	12	7	9	15	6	15	8
Afghan president replaces 2 governorsKABUL, Afghanistan -- Afghan President Hamid Karzai #39;s government Saturday replaced two governors, including a strongman in the west, in a bold step to establish control ahead of landmark presidential elections.	1	afghan president replaces governorskabul afghanistan afghan president hamid karzai government saturday replaced governors including strongman west bold step establish control ahead landmark presidential elections	1	0	1	4	1	0	6	6	0	4	0	11	0	14	13	8	0	14	7
Militants in Iraq Kill UK Hostage, Video Shows BAGHDAD (Reuters) - Militants in Iraq beheaded British hostage Kenneth Bigley, three weeks after kidnapping him to press a demand for the release of women held by U.S.-led forces, a video seen by Reuters showed on Friday.	1	militants iraq kill uk hostage video baghdad reuters militants iraq beheaded british hostage kenneth bigley weeks kidnapping press demand release women held forces video reuters friday	1	0	1	3	4	4	5	7	2	7	8	5	12	7	9	15	6	17	8
Cambodia passes succession lawCambodia approves a law to choose a new monarch, after King Sihanouk's abdication announcement.	1	cambodia passes succession lawcambodia approves law choose monarch king sihanouk abdication announcement	1	0	1	4	1	0	6	6	0	4	0	11	0	14	13	8	0	14	7
Lackluster Jobs Report Pushes Stocks DownNEW YORK - Investors pushed stocks lower Friday as a surprisingly lackluster job creation report deepened Wall Street's pessimism over the health of the economy. A solid earnings report from General Electric Co...	1	lackluster jobs report pushes stocks downnew york investors pushed stocks lower friday surprisingly lackluster job creation report deepened wall street pessimism health economy solid earnings report electric	0	1	3	2	0	6	4	8	9	10	11	12	11	3	6	16	17	18	12
For the First Time, an African Woman Wins the Nobel Peace PrizeWangari Maathai, a Kenyan who has worked tirelessly to protect the environment, improve the lives of women, and fight crime, Friday became	1	time african woman wins nobel peace prizewangari maathai kenyan tirelessly protect environment improve lives women fight crime friday	1	0	1	4	1	0	6	6	0	4	0	11	5	0	0	9	13	7	4
Toshiba claims Hollywood backing in war for next DVD standard (AFP)AFP - Toshiba said four major Hollywood studios had thrown their crucial weight behind High Definition DVD (HD-DVD), one of two disc formats contending to be the standard in next-generation DVDs.	1	toshiba claims hollywood war dvd standard afp afp toshiba major hollywood studios thrown crucial weight definition dvd disc formats contending standard dvds	0	1	0	1	3	3	7	3	6	9	7	9	6	13	14	6	12	6	13
Court Declines to Hear Gay Marriage Case (AP)AP - The Supreme Court on Monday sidestepped a dispute over gay marriages, rejecting a challenge to the nation's only law sanctioning such unions.	1	court declines hear gay marriage ap ap supreme court monday sidestepped dispute gay marriages rejecting challenge nation law sanctioning unions	1	0	1	4	1	5	3	2	1	0	10	8	0	14	13	8	0	14	7
Sharon Survives 3 Parliament No-Confidence Votes JERUSALEM (Reuters) - Prime Minister Ariel Sharon on Monday narrowly survived three parliamentary no-confidence votes sponsored by opposition parties over deepening poverty in Israel.	1	sharon survives parliament votes jerusalem reuters prime minister ariel sharon monday narrowly survived parliamentary votes sponsored opposition parties deepening poverty israel	1	0	1	4	1	0	6	6	0	4	0	11	0	14	13	3	4	10	7
Putin Heads for Turkey in Landmark Visit Between Former FoesRussian President Vladimir Putin is making a two-day official visit to Turkey, the first by any Russian leader in 32 years. Mr. Putin is expected to sign several economic cooperation agreements	1	putin heads turkey landmark visit foesrussian president vladimir putin official visit turkey russian leader putin expected sign economic cooperation agreements	1	0	1	4	1	0	6	6	0	4	0	11	5	0	0	9	13	7	4
Two Manny dadsDAVE Norman, the Sydney police constable who rushed to Jakarta to be with his critically injured daughter Manny Musu, underwent a DNA test to prove he is her biological father.	1	manny dadsdave norman sydney police constable rushed jakarta critically injured daughter manny musu underwent dna test prove biological father	1	0	1	3	4	4	1	5	5	3	3	4	4	4	7	5	3	3	2
Romania Faces Hung Parliament Risk After Vote BUCHAREST (Reuters) - Romania faced weeks of uncertainty on Monday after inconclusive general elections in the poor Balkan country, already struggling to stay on track to join the European Union. Partial results showed the ruling ex-communist Social Democrats (PSD) of Prime Minister Adrian Nastase a whisker ahead of the opposition centrists in Sunday'…	1	romania hung parliament risk vote bucharest reuters romania faced weeks uncertainty monday inconclusive elections poor balkan country struggling stay track join european union partial ruling social democrats psd prime minister adrian nastase whisker ahead opposition centrists sunday election short majority parliament	1	0	1	4	1	0	6	6	0	4	0	11	0	14	13	8	0	14	7
At Last, Success on the Road for LionsThe Detroit Lions went three full seasons without winning an away game, setting an NFL record for road futility. They ended that ignominious streak Sunday in their first opportunity of the season, beating the Chicago Bears 20-16 at Soldier Field...	1	success road lionsthe detroit lions seasons winning game setting nfl record road futility ignominious streak sunday opportunity season beating chicago bears soldier field	0	2	2	0	2	2	1	4	7	5	9	2	1	1	1	1	11	5	1
Terror Suspect Escapes From Bahrain CourtA terror suspect escaped from court in Bahrain Monday after a judge renewed the detention order and three fellow detainees for 30 days.	1	terror suspect escapes bahrain courta terror suspect escaped court bahrain monday judge renewed detention fellow detainees days	1	0	1	4	1	4	3	2	2	0	8	5	7	8	11	13	6	15	10
Ivorian unrest poses new test for FranceTwo years after French forces arrived to restore order in turmoil-torn Ivory Coast, a peace agreement between Ivorian rebels and the government of President Laurent Gbagbo is in	1	ivorian unrest poses test francetwo french forces arrived restore ivory coast peace agreement ivorian rebels government president laurent gbagbo	1	0	1	3	4	0	6	6	0	4	0	11	5	0	0	9	13	7	4
Dive recovers Cromwell's sailorA sailor from a sunken ship belonging to Oliver Cromwell's navy had the upper body of a trapeze artist but bowed legs, his recovered skeleton shows.	1	dive recovers cromwell sailora sailor sunken ship belonging oliver cromwell navy upper body trapeze artist bowed legs recovered skeleton	0	0	1	4	5	0	7	3	8	8	1	0	8	6	4	4	15	0	17
Anxious wait for whale rescuersRESCUE workers will know this morning if their attempts to save whales beached yesterday on Maria Island, off Tasmania #39;s east coast, were successful.	1	anxious wait whale rescuersrescue workers morning attempts save whales beached yesterday maria island tasmania east coast successful	1	0	1	3	5	4	5	7	8	8	6	0	2	11	12	5	1	11	18
Iraq war was illegal: ChiracHANOI: French President Jacques Chirac has said the US-led war in Iraq was illegal and expressed his fear for the countrys future in the face of a civil war.	1	iraq war illegal chirachanoi french president jacques chirac war iraq illegal expressed fear countrys future civil war	1	0	1	4	1	0	6	6	0	4	0	11	5	0	0	9	13	7	4
Putin Seeks More Control Over Regions, GovernorsIn an address to the countrys top officials on Monday Russian President Vladimir Putin announced initiatives that would further strengthen the federal centers control over political life.	1	putin seeks control regions governorsin address countrys top officials monday russian president vladimir putin announced initiatives strengthen federal centers control political life	1	0	1	4	1	0	6	6	0	4	0	11	0	14	13	8	0	14	7
California Official Rules on Gay MarriageSAN FRANCISCO - California's constitution permits laws against gay marriage, the state's attorney general declared Friday in a long-awaited legal opinion that sought to avoid offending either side of the debate. While acknowledging that "committed and loving relationships between two individuals deserve recognition under California law," Attorney General B…	1	california official rules gay marriagesan francisco california constitution permits laws gay marriage attorney declared friday legal opinion sought avoid offending debate acknowledging committed loving relationships individuals deserve recognition california law attorney bill lockyer voters legislature decide questions gay couples allowed marry	1	0	1	4	1	5	3	2	1	0	0	8	0	14	13	8	0	14	7
Sudan backtracks on aid workersSudan reverses its decision to expel Oxfam and Save the Children's local heads, accused of political meddling.	1	sudan backtracks aid workerssudan reverses decision expel oxfam save children local heads accused political meddling	1	0	1	4	1	0	6	6	0	4	0	11	5	0	0	15	13	17	8
Will Putin misuse Beslan terrorism?THE UNSPEAKABLE tragedy in Beslan, the town in Southern Russia where terrorists seized a school on the first day of class and where more than 300 people	1	putin misuse beslan terrorism unspeakable tragedy beslan town southern russia terrorists seized school day class people	1	0	1	3	4	4	5	7	2	7	6	4	4	7	7	5	9	3	3
Ivory Coast facing UN sanctionsFrance is pushing to win passage of a UN resolution that seeks an arms embargo and other penalties against the Ivory Coast. France #39;s UN ambassador, Jean-Marc de la Sabliere, hopes for a vote early this week.	1	ivory coast facing sanctionsfrance pushing win passage resolution seeks arms embargo penalties ivory coast france ambassador de la sabliere hopes vote week	1	0	1	4	1	0	6	6	0	4	0	11	5	0	0	9	13	7	4
U.S. Warns Americans to Avoid Haiti (AP)AP - Security in Haiti remains unpredictable and dangerous, and Americans should not travel to the Caribbean nation except for emergencies, the State Department said Friday.	1	warns americans avoid haiti ap ap security haiti remains unpredictable dangerous americans travel caribbean nation emergencies department friday	1	0	1	4	5	5	3	2	1	0	6	8	4	11	12	10	10	12	11
Jordan prince loses successionJordan #39;s Prince Hamzah says he is conceding to the wish of King Abdullah II to strip him of his crown as heir to the throne. quot;I obey the command of my elder brother out of my loyalty, love	1	jordan prince loses successionjordan prince hamzah conceding king abdullah ii strip crown heir throne quot obey command elder brother loyalty love	1	0	1	4	4	4	5	7	2	7	0	4	4	7	7	3	4	10	3
Chirac #39;s tour of China magnifies partnershipDialogue between China and France, two countries which highly value cultural diversity and pluralism in international politics, is no doubt conducive to world peace.	1	chirac tour china magnifies partnershipdialogue china france countries highly cultural diversity pluralism international politics doubt conducive peace	1	0	1	4	1	0	6	6	0	4	0	11	5	0	0	9	13	7	4
Israelis Trudge Home, in Shock After BombingsAt least 29 people were killed and more than 160 were injured in what Israeli officials believed were terrorist bombings.	1	israelis trudge shock bombingsat people killed injured israeli officials believed terrorist bombings	1	0	1	3	4	4	5	7	2	7	6	4	4	7	7	5	9	3	3
Two gored to death in Spanish bull-runTwo Spanish men were gored to death by fighting bulls yesterday during the bull-run at the local fiestas in Ampuero, a town 30 miles east of the northern port city of Santander.	1	gored death spanish spanish gored death fighting bulls yesterday local fiestas ampuero town miles east northern port city santander	1	0	1	3	4	4	5	7	2	7	6	4	4	7	7	5	9	12	3
Fierce fighting in IraqBAGHDAD, Sept 12: At least 45 people died in a wave of bombings and battles between US troops and militants on Sunday, as Iraq #39;s US-installed prime minister said over 3,000 had perished in the #39;terrorism #39; washing over the country.	1	fierce fighting iraqbaghdad sept people died wave bombings battles troops militants sunday iraq prime minister perished terrorism washing country	1	0	1	3	4	4	5	7	2	7	6	4	12	7	10	15	9	17	8
Turkey a step closer to BrusselsThe European Commission is set to give the green light later today to accession talks with Turkey. EU leaders will take a final decision in December.	1	turkey step closer brusselsthe european commission set green light accession talks turkey eu leaders final decision december	1	0	1	4	1	0	6	6	0	4	0	11	5	0	0	9	13	7	4
Greenpeace #39;shocked #39; over death of anti-nuclear protestorPARIS - The international environment watchdog group Greenpeace said Monday it was quot;shocked and very saddened quot; by the death of a French protestor who was struck and killed Sunday by a train transporting nuclear waste to Germany.	1	greenpeace shocked death protestorparis international environment watchdog greenpeace monday quot shocked saddened quot death french protestor struck killed sunday train transporting nuclear waste germany	1	0	1	3	4	4	5	7	2	7	6	4	5	0	0	9	13	7	4
Musharraf Sees 'Light at End of Tunnel' with India (Reuters)Reuters - Pakistani President Pervez\Musharraf said on Monday there were prospects for resolving all\disputes with India, including over Kashmir, through peace\talks now under way.	1	musharraf tunnel india reuters reuters pakistani president monday prospects resolving india including kashmir	1	0	1	4	1	0	6	6	0	4	0	11	5	0	0	9	13	7	4
U.S.: Korea Cloud Not From Nuclear Blast (AP)AP - A huge mushroom cloud that reportedly billowed up from North Korea was not caused by a nuclear explosion, South Korean and U.S. officials said Sunday, but they said the cause was a mystery.	1	korea cloud nuclear blast ap ap huge mushroom cloud reportedly billowed north korea caused nuclear explosion south korean officials sunday mystery	1	0	1	3	4	0	6	6	0	4	0	11	5	0	0	9	13	7	4
Bomb rocks Indonesia #39;s Paris embassyA small parcel bomb has exploded outside the Indonesian embassy in Paris, slightly injuring 10 people and shattering windows, but officials say they have no clues to the motive.	1	bomb rocks indonesia paris embassya parcel bomb exploded indonesian embassy paris injuring people shattering windows officials clues motive	1	0	1	3	4	4	5	7	2	7	6	4	4	7	7	5	9	3	3
Pakistan tests nuclear-capable missileISLAMABAD - Pakistan test-fired a short-range missile capable of carrying nuclear weapons on Monday, and said more tests are planned.	1	pakistan tests missileislamabad pakistan missile capable carrying nuclear weapons monday tests planned	1	0	1	4	1	0	6	6	0	4	0	11	5	0	0	9	13	7	4
Armitage holds talks with Pakistani leaders:World News: Islamabad, Nov 9 : US Deputy Secretary of State Richard Armitage Tuesday met top Pakistani leaders to exchange views on a wide array of issues, including the dialogue between Pakistan and India and the war on terror.	1	armitage holds talks pakistani leaders news islamabad nov deputy secretary richard armitage tuesday met top pakistani leaders exchange views wide array issues including dialogue pakistan india war terror	1	0	1	4	1	0	6	6	0	4	0	11	5	0	0	9	13	7	4
Turkey #39;s Adultery Ban Would Hinder EU Bid, Aides Say (Update1)Turkey #39;s plan to make adultery a crime may hinder its bid to join the European Union by showing the dominance of conservative forces #39; #39; in Turkish society, European officials said.	1	turkey adultery ban hinder eu bid aides update1 turkey plan adultery crime hinder bid join european union dominance conservative forces turkish society european officials	1	0	1	4	1	0	6	6	0	4	0	11	5	0	0	9	13	7	4
EU will go it alone on nuclear project if French site bid failsBRUSSELS, Nov 9 (AFP) - The European Union said Tuesday it was prepared to forge ahead with a revolutionary nuclear energy project if negotiations with Japan and other backers on where to locate it break down.	1	eu nuclear project french site bid failsbrussels nov afp european union tuesday prepared forge ahead revolutionary nuclear energy project negotiations japan backers locate break	1	0	1	4	1	0	6	6	0	4	0	11	5	0	0	9	13	7	4
Ivan Roars Into Gulf of MexicoHurricane Ivan skirted the western tip of Cuba on Monday and arced into the Gulf of Mexico with sustained winds of 160 mph, bearing down toward landfall on the U.S. Gulf Coast later this week.	1	ivan roars gulf mexicohurricane ivan skirted western cuba monday arced gulf mexico sustained winds mph bearing landfall gulf coast week	1	0	1	3	5	4	5	7	8	8	6	4	4	11	12	5	17	12	11
Japan executes child killerJapan has hanged a man convicted of stabbing to death eight elementary school children in a rampage that shocked the nation and severely shook its sense of security, local media have said.	1	japan executes child killerjapan hanged convicted stabbing death elementary school children rampage shocked nation severely shook sense security local media	1	0	1	3	4	4	3	2	2	7	8	8	7	2	7	5	10	3	3
Osaka school killer of 8, yakuza boss executedTOKYO - Mamoru Takuma, convicted for murdering eight children at an Osaka elementary school in 2001, has been executed, informed sources said Tuesday.	1	osaka school killer yakuza boss executedtokyo mamoru takuma convicted murdering children osaka elementary school executed informed sources tuesday	1	0	1	3	4	5	3	2	1	0	8	8	7	8	11	13	10	13	10
Bomb Explosion in Nepali Capital Wounds 38 KATHMANDU (Reuters) - A bomb tore through a government building under construction in the Nepali capital on Tuesday, wounding at least 38 people in an attack police suspect was carried out by Maoist rebels.	1	bomb explosion nepali capital wounds kathmandu reuters bomb tore government building construction nepali capital tuesday wounding people attack police suspect carried maoist rebels	1	0	1	3	4	4	5	7	2	7	6	4	4	7	7	5	9	3	3
Kenyan tree planter wins Nobel Peace Prize: reportLONDON (CBS.MW) -- Kenyan tree planter and government minister Wangari Maathai has won the Nobel Peace Prize, Agence France-Presse said.	1	kenyan tree planter wins nobel peace prize reportlondon kenyan tree planter government minister wangari maathai won nobel peace prize agence	1	0	1	4	1	0	6	6	0	4	0	11	5	0	0	9	13	7	4
Int #39;l conference calls for mine-free worldSenior officials of 143 governments are calling for the total ban of production and use of anti-personnel landmine. Senior government officials of 143 countries across the world	1	int conference calls worldsenior officials governments calling total ban production landmine senior government officials countries	1	0	1	4	1	0	6	6	0	4	0	11	5	0	0	9	13	7	4
Cambodia plays active role in ASEANCambodia has been active and playing an increasingly important role in the Association of Southeast Asian Nations (ASEAN) and regional affairs politically and economically	1	cambodia plays active role aseancambodia active playing increasingly role association southeast asian nations asean regional affairs politically economically	0	0	1	4	1	0	6	6	0	4	0	11	5	0	0	9	13	7	4
Iraqis Plead With U.S. to Return to City (AP)AP - U.S. troops barred anguished crowds from returning to their homes in the besieged city of Tal Afar on Monday as residents described corpses scattered across orchards and the collapse of essential services such as water and electricity.	1	iraqis plead return city ap ap troops barred anguished crowds returning homes besieged city tal afar monday residents corpses scattered orchards collapse essential services water electricity	1	0	1	3	4	4	5	7	2	7	6	4	4	7	10	5	9	17	8
South Africa Intervenes in Ivory CoastSouth African President Thabo Mbeki flew to Ivory Coast on Tuesday to launch an African effort to rein in four days of violence that have killed at least 20 people, wounded more than 600 and shut down cocoa exports from the world's largest producer.	1	south africa intervenes ivory coastsouth african president thabo mbeki flew ivory coast tuesday launch african effort rein days violence killed people wounded shut cocoa exports largest producer	1	0	1	3	4	4	5	7	2	7	6	4	5	0	0	9	13	7	4
Tremor shook JapanAt least 14 people sustained injuries when a strong earthquake with a preliminary magnitude of 7.1 hit a sparsely populated area of Japan #39;s northernmost main island of Hokkaido.	1	tremor shook japanat people sustained injuries strong earthquake preliminary magnitude hit sparsely populated japan northernmost main island hokkaido	1	0	1	3	4	4	5	7	2	7	6	4	4	11	7	5	9	3	3
U.S. Forces Push Into Heart of FallujahU.S. Army and Marine units thrust into the heart of the insurgent stronghold of Fallujah on Tuesday, fighting fierce street battles and conducting house-to-house searches on the second day of a major assault to retake the city from Islamic militants.	1	forces push heart army marine units thrust heart insurgent stronghold fallujah tuesday fighting fierce street battles conducting searches day major assault retake city islamic militants	1	0	1	3	4	4	5	7	2	7	6	4	12	7	10	15	9	17	8
Colombia Accuses Cos. of Illegal ImportsThe Colombian government has filed a lawsuit accusing Pernod Ricard SA, Diageo PLC and Seagram Export Sales Co. of illegally importing spirits via Colombian companies that launder drug money.	1	colombia accuses illegal importsthe colombian government filed lawsuit accusing pernod ricard sa diageo plc seagram export sales illegally importing spirits colombian companies launder drug money	0	1	3	4	1	5	3	2	1	0	10	8	7	8	14	6	12	13	13
Kenyan tree planter wins peace prizeWangari Maathai, a Kenyan environmentalist, today became the first African woman to win the Nobel peace prize. Ms Maathai, 64, Kenya #39;s deputy environment minister, heads the Green Belt movement, a group that	1	kenyan tree planter wins peace prizewangari maathai kenyan environmentalist african woman win nobel peace prize ms maathai kenya deputy environment minister heads green belt movement	1	0	1	4	1	0	6	6	0	4	0	11	5	0	0	9	13	7	4
FDA Approves Lens Implant to Sharpen SightWASHINGTON - There's a new option for people who suffer from extreme nearsightedness, whose world loses its crisp edge just a few inches from their noses. The first implantable lens for nearsightedness was approved Monday by the Food and Drug Administration...	1	fda approves lens implant sharpen sightwashington option people suffer extreme nearsightedness loses crisp edge inches noses implantable lens nearsightedness approved monday food drug administration	0	1	3	4	5	5	3	2	1	0	10	8	7	2	11	10	10	13	16
Colombia reveals plot to assassinate BushColombian rebels plotted to assassinate George Bush during his brief stopover in the port of Cartagena last week, according to the country #39;s defence minister.	1	colombia reveals plot assassinate bushcolombian rebels plotted assassinate george bush stopover port cartagena week country defence minister	1	0	1	4	1	0	6	6	0	4	0	11	0	14	13	8	0	14	7
Kenyan activist plants tree to mark Nobel prizeCrying with delight, Kenyan environmentalist Wangari Maathai planted a tree to celebrate winning the Nobel Peace Prize on Friday and vowed to use the money	1	kenyan activist plants tree mark nobel prizecrying delight kenyan environmentalist wangari maathai planted tree celebrate winning nobel peace prize friday vowed money	1	0	1	4	5	0	6	6	0	4	0	11	5	0	0	9	13	7	4
Zarqawi group claims Mosul killingsBAGHDAD -- Iraq's most feared terrorist group claimed responsibility yesterday for slaughtering members of the Iraqi security forces in Mosul, where dozens of bodies have been found. The claim raises fears the group has expanded to the north after the loss of its purported base in Fallujah.	1	zarqawi claims mosul killingsbaghdad iraq feared terrorist claimed responsibility yesterday slaughtering iraqi security forces mosul dozens bodies claim raises fears expanded north loss purported base fallujah	1	0	1	3	4	4	5	7	2	7	6	5	12	7	10	15	9	17	8
Africa condemned to major polio epidemic - U.N. (Reuters)Reuters - A major polio epidemic in West and Central Africa is inevitable in coming months, but the disease could be eradicated worldwide next year by mass immunisations, the World Health Organisation (WHO) said on Friday.	1	africa condemned major polio epidemic reuters reuters major polio epidemic west central africa inevitable coming months disease eradicated worldwide mass immunisations health organisation friday	1	0	1	3	5	0	6	6	0	4	0	11	5	2	0	10	10	7	16
Reclusive Amish could be thrown into election battleground (AFP)AFP - Martha Lapp hopes to vote for the first time in the US presidential election, in which the reclusive Amish sect that her family belongs to could play a key role.	1	reclusive amish thrown election battleground afp afp martha lapp hopes vote time presidential election reclusive amish sect family belongs play key role	1	0	1	4	1	0	6	6	0	4	0	11	0	14	13	8	0	14	7
Afghans Vow to Kill UN Hostage if Demands Not Met KABUL (Reuters) - A Taliban splinter group holding three U.N. workers hostage demanded a response to its demands from the Afghan government and United Nations by Tuesday afternoon, saying it would kill one captive if they were not met.	1	afghans vow kill hostage demands met kabul reuters taliban splinter holding workers hostage demanded response demands afghan government united nations tuesday afternoon kill captive met	1	0	1	3	4	4	5	7	2	7	8	5	12	7	9	15	6	15	8
Washington admits failure to get Iran to UN Security CouncilVIENNA (MNA) - A United States official confirmed to AFP news agency on Friday that Washington fails to take Irans nuclear issue to the United Nations Security Council for possible sanctions against Tehran.	1	washington admits failure iran security councilvienna mna united official confirmed afp news agency friday washington fails irans nuclear issue united nations security council sanctions tehran	1	0	1	4	1	0	6	6	0	4	0	11	5	0	0	9	13	7	4
Greek Orthodox patriarch is accident victimVatican, Sep. 13 (CWNews.com) - The Greek Orthodox Patriarch Petros VII of Alexandria was killed in a helicopter crash on September 11, along with several other Orthodox prelates, as he traveled to Mount Athos.	1	greek orthodox patriarch accident victimvatican greek orthodox patriarch petros vii alexandria killed helicopter crash september orthodox prelates traveled mount athos	1	0	1	3	5	4	5	7	8	8	6	4	4	6	7	5	9	3	3
PA #39;s Abbas rules out interim deal with IsraelThe Palestinians will not accept an interim settlement with Israel, Palestine Liberation Organization chief Mahmoud Abbas told the Arab League during a visit to Egypt yesterday.	1	pa abbas rules interim deal israelthe palestinians accept interim settlement israel palestine liberation organization chief mahmoud abbas told arab league visit egypt yesterday	1	0	1	4	1	0	6	6	0	4	0	11	5	7	7	3	4	10	3
Sharon faces Netanyahu challengeIsraeli Prime Minister Ariel Sharon has received a surprise challenge to his plan to expedite a pullout from Gaza after Benjamin Netanyahu, his main rival in the Likud party, called for a referendum on the issue.	1	sharon netanyahu challengeisraeli prime minister ariel sharon received surprise challenge plan expedite pullout gaza benjamin netanyahu main rival likud party called referendum issue	1	0	1	4	1	0	6	6	0	4	0	11	0	14	13	3	4	10	7
French Trial Watches Bomb Plot Surveillance Tape (Reuters)Reuters - A Paris court watched on Friday a\surveillance video shot by Islamic militants plotting to bomb a\Strasbourg market, in which a commentator brands the French\city a modern-day Babylon whose residents would go to hell.	1	french trial watches bomb plot surveillance tape reuters reuters paris court watched friday video shot islamic militants plotting bomb market commentator brands babylon residents hell	1	0	1	3	4	4	5	7	2	7	8	5	4	7	7	13	6	15	3
France #39;s American problemPARIS -- US diplomats here respond to Jacques Chirac #39;s continued Yankee-bashing following George W. Bush #39;s re-election by saying the French president is out of step with his people, who are not nearly that anti-American.	1	france american problemparis diplomats respond jacques chirac continued george bush french president step people	1	0	1	4	1	0	6	6	0	4	0	11	5	0	0	9	13	7	4
Jets hit rebel city in payback for hotel raidBAGHDAD: US fighter jets bombed the rebel-held city of Fallujah yesterday, killing at least 10 people, hours after rockets slammed into a Baghdad hotel used by foreign journalists and contractors.	1	jets hit rebel city payback hotel raidbaghdad fighter jets bombed city fallujah yesterday killing people hours rockets slammed baghdad hotel foreign journalists contractors	1	0	1	3	4	4	5	7	2	7	6	4	4	7	7	5	9	3	3
Explosion in Kathmandu injures 30At least 30 people have been hurt in a explosion in Nepal #39;s capital, Kathmandu. Police say it was a bomb. The explosion struck a building of the government-owned Employees #39; Provident Fund that was under construction.	1	explosion kathmandu injures 30at people hurt explosion nepal capital kathmandu police bomb explosion struck building employees provident fund construction	1	0	1	3	4	4	5	7	2	7	6	4	4	7	7	5	9	3	3
Rights activist, environmentalist wins peace prizeWangari Maathai, a Kenyan woman who started an environmental movement that has planted 30 million trees in Africa and who has campaigned for women #39;s rights and greater democracy in her home country, won the 2004 Nobel Peace Prize yesterday.	1	rights activist environmentalist wins peace prizewangari maathai kenyan woman started environmental movement planted trees africa campaigned women rights democracy country won nobel peace prize yesterday	1	0	1	4	1	0	6	6	0	4	0	11	5	0	0	9	13	7	4
New Spasm of Violence Sweeps Iraq, Killing 110 BAGHDAD (Reuters) - At least 110 people were killed across Iraq on Sunday in a sharp escalation of violence that saw gun battles, car bombs and bombardments rock the capital.	1	spasm violence sweeps iraq killing baghdad reuters people killed iraq sunday sharp escalation violence gun battles car bombs bombardments rock capital	1	0	1	3	4	4	5	7	2	7	6	4	4	7	7	5	9	3	3
Israel scrambled warplanes #39;in case of hijacking threat #39;Israeli warplanes scrambled as soon as news broke of the Taba bombings. Military sources would not elaborate but analysts suggested the most likely reason was to intercept any hijacked	1	israel scrambled warplanes hijacking threat israeli warplanes scrambled news broke taba bombings military sources elaborate analysts suggested reason intercept hijacked	1	0	1	3	4	4	5	7	2	7	6	4	4	7	7	3	4	10	3
Strong quake hits HokkaidoSAPPORO -- A fairly strong earthquake hit eastern Hokkaido, northern Japan, late Monday night, and several people suffered minor injuries, officials said.	1	strong quake hits hokkaidosapporo fairly strong earthquake hit eastern hokkaido northern japan late monday night people suffered minor injuries officials	1	0	1	3	4	4	5	7	2	7	6	4	4	7	7	5	9	3	3
Karzai sacks regional governorAt least two protesters were killed when supporters of a sacked Afghan governor clashed with US and Afghan security forces in the western city of Herat.	1	karzai sacks regional governorat protesters killed supporters sacked afghan governor clashed afghan security forces western city herat	1	0	1	3	4	4	5	7	2	7	6	4	4	7	7	5	9	3	3
US soldier convicted of torture in IraqA US military intelligence soldier in Iraq has been sentenced to 8 months in prison for taking part in torturing detainees in Abu Ghraib prison.	1	soldier convicted torture iraqa military intelligence soldier iraq sentenced months prison torturing detainees abu ghraib prison	1	0	1	3	4	4	3	2	2	7	8	5	12	8	11	13	6	15	10
Europe compromises with US on Iran nuke deadlinecharge Iran vehemently denies. The IAEA has found many previously concealed nuclear activities in Iran. but no quot;smoking gun quot; backing the US view.	1	europe compromises iran nuke deadlinecharge iran vehemently denies iaea concealed nuclear activities iran quot smoking gun quot view	1	0	1	4	1	0	6	6	0	4	0	11	5	0	0	9	13	7	4
Chirac puts retirement on holdPresident Jacques Chirac passed his 72nd birthday yesterday locked in a struggle to maintain his relevance in the face of an intraparty challenge and continuing friction with the world #39;s only superpower.	1	chirac retirement holdpresident jacques chirac passed 72nd birthday yesterday locked struggle maintain relevance intraparty challenge continuing friction superpower	0	2	2	4	1	0	6	6	0	4	0	11	5	0	0	9	1	1	4
EU draft draws fire in TurkeyBRUSSELS: Turkey will have to recognize the Republic of Cyprus, if only tacitly, if it wants to begin membership negotiations with the European Union, according to a draft document that was leaked here Monday.	1	eu draft draws fire turkeybrussels turkey recognize republic cyprus tacitly membership negotiations european union draft document leaked monday	1	0	1	4	1	0	6	6	0	4	0	11	5	0	0	9	13	7	4
Polish PM Tries to Head Off Dispute Over WW2 Claims KRYNICA, Poland (Reuters) - Polish leader Marek Belka tried to head off a controversy with Berlin over World War II reparations after Poland's parliament caused anger in Germany by declaring Poles were still owed for wartime losses.	1	polish pm head dispute ww2 claims krynica poland reuters polish leader marek belka head controversy berlin war ii reparations poland parliament caused anger germany declaring poles owed wartime losses	1	0	1	4	1	0	6	6	0	4	0	11	0	14	13	8	0	14	7
U.S. Piles Pressure on Sudan with New U.N. Measure (Reuters)Reuters - The United\States piled pressure on Sudan Wednesday to accept a more\powerful monitoring force in Darfur with a new U.N. draft\resolution threatening sanctions on its oil industry.	1	piles pressure sudan measure reuters reuters piled pressure sudan wednesday accept monitoring force darfur threatening sanctions oil industry	1	0	1	4	1	0	6	6	0	4	0	11	5	0	0	9	13	7	4
Accused deserter surrenders in JapanAn accused US Army deserter has surrendered at a US military base near Tokyo to face charges filed in 1965, the Kyodo news service reported.	1	accused deserter surrenders japanan accused army deserter surrendered military base tokyo charges filed kyodo news service reported	1	0	1	3	4	5	3	2	1	0	8	8	7	8	11	13	6	15	10
On an old road to Damascus: An ancient city finds new lifeDAMASCUS -- The crowd begins filling the courtyard of Opaline, a trendy restaurant, as late evening teeters toward early morning. Many arrive by golf cart, whisked through alleys to the wooden doors of a centuries-old Arab home within Old City walls.	1	road damascus ancient city lifedamascus crowd filling courtyard opaline trendy restaurant late evening teeters morning arrive golf cart whisked alleys wooden doors arab city walls	1	0	1	3	4	4	5	7	2	7	6	4	4	7	7	15	9	17	3
Collingwood anchors England (AFP)AFP - Paul Collingwood's unbeaten 80 took England to 299 for seven against Zimbabwe in their opening Champions Trophy Pool D match at Edgbaston here.	1	collingwood anchors england afp afp paul collingwood unbeaten england zimbabwe champions trophy pool match edgbaston	0	2	2	0	2	1	2	1	3	2	4	1	10	12	2	2	16	4	15
Indonesian police release video tape of embassy blastIndonesian police have released video footage of the explosion outside the Australian embassy in Jakarta. At the same time they say there is no evidence to support the Australian Foreign Minister #39;s claim that	1	indonesian police release video tape embassy blastindonesian police released video footage explosion australian embassy jakarta time evidence support australian foreign minister claim	1	0	1	3	4	4	5	7	2	7	8	5	12	7	9	5	6	3	3
Rebel Attacks Hit Baghdad as Rumsfeld Visits IraqA rocket attack and suicide car bombing killed at least four people in Baghdad Sunday as Defense Secretary Donald Rumsfeld began an unannounced visit to Iraq to gauge efforts to calm violence before January elections.	1	rebel attacks hit baghdad rumsfeld visits iraqa rocket attack suicide car bombing killed people baghdad sunday defense secretary donald rumsfeld unannounced visit iraq gauge efforts calm violence january elections	1	0	1	3	4	4	5	7	2	7	6	4	4	7	7	5	9	3	3
World News: Zimbabwe jails UK #39;coup plotter #39;The British leader of a group of 67 alleged mercenaries accused of plotting a coup in Equatorial Guinea has been sentenced to seven years in jail.	1	news zimbabwe jails uk coup plotter british leader alleged mercenaries accused plotting coup equatorial guinea sentenced jail	1	0	1	3	4	4	3	2	1	0	8	5	7	8	11	13	6	15	10
Taiwan's Leader Urges China to Begin Talks (AP)AP - Taiwan's leader used his National Day speech Sunday to urge China to begin peace talks so the two rivals can avoid war. Chinese and Taiwanese leaders haven't met since the Communists took over China in 1949 and Taiwan began resisting the mainland's rule. China insists that Taiwan is a Chinese province and has threatened to attack if it refuses t…	1	taiwan leader urges china talks ap ap taiwan leader national day speech sunday urge china peace talks rivals avoid war chinese taiwanese leaders met communists china taiwan resisting mainland rule china insists taiwan chinese province threatened attack refuses unify eventually	1	0	1	4	1	0	6	6	0	4	0	11	5	0	0	9	13	7	4
Suicide bombers suspected in attackJAKARTA, Indonesia -- Police released yesterday a grainy photo taken by a security camera of a white delivery truck just before it blew up outside the Australian Embassy and said they suspect two suicide bombers in the vehicle set off the explosion, killing seven other people.	1	suicide bombers suspected attackjakarta indonesia police released yesterday grainy photo security camera white delivery truck blew australian embassy suspect suicide bombers vehicle set explosion killing people	1	0	1	3	4	4	5	7	2	7	6	4	4	7	7	5	9	3	3
Flight From Keys Begins as Gusts Whip JamaicaAs Hurricane Ivan began to lash Jamaica with wind and rain, officials in Florida stepped up their evacuation efforts.	1	flight gusts whip jamaicaas hurricane ivan lash jamaica wind rain officials florida stepped evacuation efforts	1	0	1	3	5	4	5	7	8	8	1	0	8	11	12	5	15	12	11
Peru Launches Offensive to Retake Siege Town LIMA, Peru (Reuters) - Peruvian authorities on Monday launched an offensive to retake a police station and end a three-day siege by former soldiers in a southern Andean town.	1	peru launches offensive retake siege town lima peru reuters peruvian authorities monday launched offensive retake police station siege soldiers southern andean town	1	0	1	3	4	4	5	7	2	7	6	4	4	7	7	5	9	3	3
Milosevic #39;s Lawyers to Appeal Own AppointmentTHE HAGUE, Netherlands -- The two lawyers representing Slobodan Milosevic filed papers Thursday (9 September), asking for permission to appeal their appointment by the UN tribunal.	1	milosevic lawyers appeal appointmentthe hague netherlands lawyers representing slobodan milosevic filed papers thursday september permission appeal appointment tribunal	1	0	1	4	1	5	3	2	1	0	8	8	7	8	11	13	6	15	10
Two Car Bombs Kill 10 Iraqis in BaghdadBAGHDAD, Iraq - Two car bombs shook the capital in quick succession Sunday, killing at least 10 Iraqis and wounding 16, police and hospital officials said. One American soldier was hurt...	1	car bombs kill iraqis baghdadbaghdad iraq car bombs shook capital quick succession sunday killing iraqis wounding police hospital officials american soldier hurt	1	0	1	3	4	4	5	7	2	7	6	4	4	7	7	5	9	3	3
Alleged U.S. Deserter Set to SurrenderTOKYO - Accused U.S. Army deserter Charles Jenkins left his Tokyo hospital for an American military base to surrender to military authorities Saturday, nearly 40 years after he allegedly defected to North Korea...	1	alleged deserter set surrendertokyo accused army deserter charles jenkins left tokyo hospital american military base surrender military authorities saturday allegedly defected north korea	1	0	1	3	4	4	3	2	2	7	8	5	7	8	11	13	6	15	10
Alleged U.S. Deserter Set to Surrender (AP)AP - Accused U.S. Army deserter Charles Jenkins left his Tokyo hospital for an American military base to surrender to military authorities Saturday, nearly 40 years after he allegedly defected to North Korea.	1	alleged deserter set surrender ap ap accused army deserter charles jenkins left tokyo hospital american military base surrender military authorities saturday allegedly defected north korea	1	0	1	3	4	4	3	2	2	7	8	5	7	8	11	13	6	15	10
U.S. Troops Lay Siege to Iraqi City (AP)AP - U.S. troops handed over medical supplies to Iraqi relief workers Friday amid a siege of a northeastern ethnic Turkish city where Iraqi and American forces are trying to root out hundreds of militants.	1	troops lay siege iraqi city ap ap troops handed medical supplies iraqi relief workers friday amid siege northeastern ethnic turkish city iraqi american forces root hundreds militants	1	0	1	3	4	4	5	7	2	7	6	5	12	7	10	15	9	17	8
Cambodia #39;s king wants to abdicateCambodian King Norodom Sihanouk has announced he is too ill to continue and has confirmed he plans to abdicate. Prince Ranariddh, the king #39;s son has traveled to Beijing, where	1	cambodia king abdicatecambodian king norodom sihanouk announced ill continue confirmed plans abdicate prince ranariddh king son traveled beijing	0	0	1	4	1	0	6	6	0	4	0	11	0	14	13	8	0	14	7
Ivory Coast Leader Urges End to Violence ABIDJAN (Reuters) - Ivory Coast President Laurent Gbagbo appealed for an end to the anti-French violence which erupted after France destroyed most of the country's air force in retaliation for the killing of nine French peacekeepers.	1	ivory coast leader urges violence abidjan reuters ivory coast president laurent gbagbo appealed violence erupted france destroyed country air force retaliation killing french peacekeepers	1	0	1	3	4	4	5	7	2	7	6	4	4	0	0	5	13	7	4
Baghdad Car Bombs Kill 11, Including GIBAGHDAD, Iraq - Two car bombs shook the capital in quick succession Sunday, killing at least 11 people, including an American soldier, and wounding 16, U.S. and Iraqi officials said, as Defense Secretary Donald H...	1	baghdad car bombs kill including gibaghdad iraq car bombs shook capital quick succession sunday killing people including american soldier wounding iraqi officials defense secretary donald	1	0	1	3	4	4	5	7	2	7	6	4	4	7	7	5	9	3	3
Negotiations for hostages in Afghanistan fall shortMilitants holding hostage three foreign UN workers in Afghanistan said they negotiated yesterday with Afghan government and UN officials in southern Afghanistan but that the meeting ended without results.	1	negotiations hostages afghanistan fall shortmilitants holding hostage foreign workers afghanistan negotiated yesterday afghan government officials southern afghanistan meeting	1	0	1	3	4	4	5	7	2	7	8	5	12	7	9	15	6	15	8
Car Bomb North of Baghdad Kills 7, Wounds 19 (Reuters)Reuters - A car bomb exploded near a U.S.\military patrol in the town of Baiji, north of Baghdad, on\Tuesday, killing at least seven Iraqis and wounding 20 people,\including two U.S. soldiers, doctors and the military said.	1	car bomb north baghdad kills wounds reuters reuters car bomb exploded patrol town baiji north baghdad killing iraqis wounding people soldiers doctors military	1	0	1	3	4	4	5	7	2	7	6	4	4	7	7	5	9	3	3
Musharraf Can Be Pakistan President and Army Chief ISLAMABAD (Reuters) - Pakistan's acting president signed a bill on Tuesday that will allow military ruler Pervez Musharraf to stay on as army chief despite his pledge to quit the office by the end of the year.	1	musharraf pakistan president army chief islamabad reuters pakistan acting president signed bill tuesday military ruler pervez musharraf stay army chief pledge quit office	1	0	1	4	1	0	6	6	0	4	0	11	0	0	0	8	0	14	4
Preparations begin for return of sailor's body; tow ending for sub (Canadian Press)Canadian Press - HALIFAX (CP) - As preparations began for the return to Canada of a sailor killed in a submarine fire in the North Atlantic, the HMCS Chicoutimi was slowly being towed toward a port in Scotland.	1	preparations return sailor body tow canadian press canadian press halifax cp preparations return canada sailor killed submarine fire north atlantic hmcs chicoutimi slowly towed port scotland	1	0	1	3	5	4	5	7	8	8	1	0	8	6	4	4	15	0	17
Swedes Blast Gov't Response to Tsunami (AP)AP - Hours after a tsunami flattened south Asia beaches #151; a magnet for thousands of vacationing Swedes #151; the Swedish foreign minister went to the theater.	1	swedes blast response tsunami ap ap hours tsunami flattened south asia beaches magnet thousands vacationing swedes swedish foreign minister theater	1	0	1	3	4	4	5	7	2	7	6	4	4	7	7	5	9	3	3
Spanish PM to host French, German allies in Madrid summit (AFP)AFP - Sealing ratification of an EU constitution and the question of terrorism will top the agenda when Spanish Prime Minister Jose Luis Rodriguez Zapatero welcomes French President Jacques Chirac and German Chancellor Gerhard Schroeder to a summit meeting Monday.	1	spanish pm host french german allies madrid summit afp afp sealing ratification eu constitution question terrorism top agenda spanish prime minister jose luis rodriguez zapatero welcomes french president jacques chirac german chancellor gerhard schroeder summit meeting monday	1	0	1	4	1	0	6	6	0	4	0	11	5	0	0	9	13	7	4
Pentagon Disputes Red Cross Criticism (AP)AP - A Pentagon spokesman said Monday that Red Cross officials have "made their view known" that the indefinite detention of terror suspects at Guantanamo Bay, Cuba, amounts to torture.	1	pentagon disputes red cross criticism ap ap pentagon spokesman monday red cross officials view indefinite detention terror suspects guantanamo bay cuba amounts torture	1	0	1	3	4	4	3	2	5	3	8	5	12	8	9	13	6	15	10
Accusations of Fraud Mar Afghan ElectionKABUL, Afghanistan - Afghans packed polling stations on Saturday for a historic presidential election that was blemished when all 15 candidates opposing U.S.-backed interim President Hamid Karzai withdrew, charging the government and the U.N. with fraud and incompetence...	1	accusations fraud mar afghan electionkabul afghanistan afghans packed polling stations saturday historic presidential election blemished candidates opposing interim president hamid karzai withdrew charging government fraud incompetence	1	0	1	4	1	0	6	6	0	4	0	11	0	14	13	8	0	14	7
Israelis Kill Four Palestinians in Gaza Strip GAZA (Reuters) - Israeli troops killed four armed Palestinians in the Gaza Strip on Saturday as it pressed a massive 10-day-old offensive that has cost 85 Palestinian lives in an attempt to stop militants firing rockets.	1	israelis kill palestinians gaza strip gaza reuters israeli troops killed armed palestinians gaza strip saturday pressed massive offensive cost palestinian lives attempt militants firing rockets	1	0	1	3	4	4	5	7	2	7	6	4	4	7	7	3	4	10	3
Iraqi Forces Foundering in Face of Killings and Threats by RebelsIraqi forces, whose performance is crucial to securing January elections, are riddled with problems, say local U.S. officials.	1	iraqi forces foundering killings threats rebelsiraqi forces performance crucial securing january elections riddled local officials	1	0	1	3	4	4	5	7	2	7	6	5	12	7	10	15	9	17	8
U.S.: Korea Cloud Not From Nuclear BlastSEOUL, South Korea - A huge mushroom cloud that reportedly billowed up from North Korea was not caused by a nuclear explosion, South Korean and U.S. officials said Sunday, but they said the cause was a mystery...	1	korea cloud nuclear blastseoul south korea huge mushroom cloud reportedly billowed north korea caused nuclear explosion south korean officials sunday mystery	1	0	1	4	4	0	6	6	0	4	0	11	5	0	0	9	13	7	4
Hong Kong democrats win more seatsDemocrats have tightened their grip on Hong Kong #39;s legislature, but still have no mandate to push their agenda of universal suffrage in the southern Chinese enclave.	1	hong kong democrats win seatsdemocrats tightened grip hong kong legislature mandate push agenda universal suffrage southern chinese enclave	1	0	3	4	1	0	6	6	0	4	0	11	0	14	13	8	0	14	7
Insurgents hammer central BaghdadBAGHDAD - Insurgents hammered central Baghdad on Sunday with one of their most intense mortar and rocket barrages ever in the heart of the capital, heralding a day of violence that left nearly 60 dead nationwide as security appeared to spiral out of	1	insurgents hammer central baghdadbaghdad insurgents hammered central baghdad sunday intense mortar rocket barrages heart capital heralding day violence left dead nationwide security appeared spiral	1	0	1	3	4	4	5	7	2	7	6	4	4	7	7	5	9	3	3
Rumsfeld to Meet Foreign Defense Chiefs on Iraq MANAMA (Reuters) - Defense Secretary Donald Rumsfeld was set to meet defense chiefs from about 18 nations aboard a U.S. aircraft carrier in the Gulf Saturday as the United States looks to improve the security situation in Iraq with January elections looming.	1	rumsfeld meet foreign defense chiefs iraq manama reuters defense secretary donald rumsfeld set meet defense chiefs nations aboard aircraft carrier gulf saturday united improve security situation iraq january elections looming	1	0	1	4	1	0	6	6	0	4	0	11	5	0	0	9	13	7	4
Alstom to sign 1 billion Euro in contracts with China (AFP)AFP - The French Group Alstom Saturday will sign contracts worth up to 1 billion Euros (1.23 billion dollars) in China for the delivery of trains and locomotives, French sources with knowledge of the deal revealed to AFP.	1	alstom sign billion euro contracts china afp afp french alstom saturday sign contracts worth billion euros billion dollars china delivery trains locomotives french sources knowledge deal revealed afp	0	1	3	4	1	5	0	0	0	4	10	7	3	10	15	0	8	16	19
Hurricane Ivan Batters Grand CaymanGEORGE TOWN, Cayman Islands - Hurricane Ivan battered the Cayman Islands with ferocious 150-mph winds Sunday, threatening a direct hit as it flooded homes and ripped up roofs and trees three stories high. Ivan has killed at least 60 people as it has torn a path of destruction across the Caribbean and was headed next for western Cuba, where it was expected to hit…	1	hurricane ivan batters grand caymangeorge town cayman islands hurricane ivan battered cayman islands ferocious winds sunday threatening direct hit flooded homes ripped roofs trees stories ivan killed people torn path destruction caribbean headed western cuba expected hit monday brush florida florida gulf coast	1	0	1	3	4	4	5	7	2	7	6	4	4	11	12	5	9	12	11
Three Said Killed in Afghanistan ProtestsKABUL, Afghanistan - Protesters angered at President Hamid Karzai's sacking of a warlord governor in the west of the country ransacked U.N. compounds and clashed with security forces Sunday, leaving as many as three people dead and dozens wounded, including three U.S...	1	killed afghanistan protestskabul afghanistan protesters angered president hamid karzai sacking warlord governor west country ransacked compounds clashed security forces sunday leaving people dead dozens wounded including	1	0	1	3	4	4	5	7	2	7	6	4	4	7	7	5	9	3	3
Putin #39;s policies at faultThe spate of terrorist attacks in Russia illustrates that President Vladimir V. Putin #39;s hard-line policy in Chechnya is failing to resolve that conflict or to make Russians safer.	1	putin policies faultthe spate terrorist attacks russia illustrates president vladimir putin policy chechnya failing resolve conflict russians safer	1	0	1	4	1	0	6	6	0	4	0	11	5	0	0	9	13	7	4
U.S. Bishops Reviewing Sex Abuse PolicyThe nation's Roman Catholic bishops said Friday they will spend the next nine months deciding whether to make any changes in the policy they enacted at the height of the clergy sex abuse crisis that includes permanently barring guilty priests from church work. The review was mandated in the "Charter for the Protection of Children and Young People," the docum…	1	bishops reviewing sex abuse policythe nation roman catholic bishops friday spend months deciding policy enacted height clergy sex abuse crisis includes permanently barring guilty priests church review mandated charter protection children people document bishops emotional june assembly dallas	1	0	1	4	1	5	3	2	1	0	8	8	7	8	11	13	6	15	10
Exit Polls: Hong Kong Democrats Win Limited Gains HONG KONG (Reuters) - Pro-democracy candidates won limited gains in Hong Kong's Legislative Council election on Sunday and the pro-Beijing camp achieved a better-than-expected showing, exit polls showed.	1	exit polls hong kong democrats win limited gains hong kong reuters candidates won limited gains hong kong legislative council election sunday camp achieved exit polls	1	0	3	2	1	0	6	6	0	4	0	11	0	14	13	8	0	14	7
France Says Hostages Still Alive a Few Days AgoFrance said on Sunday two French reporters held hostage with their Syrian driver in Iraq were still alive a few days ago. quot;We are working discreetly, following up leads, reestablishing	1	france hostages alive days agofrance sunday french reporters held hostage syrian driver iraq alive days ago quot discreetly leads reestablishing	1	0	1	3	4	4	5	7	2	7	8	5	12	7	9	15	6	15	8
Coalition holds off efforts to take rebel-run citiesUS surgical strikes continue in Fallujah, Samarra, and Tal Afar. But US says Iraqi forces are not ready to launch major attacks. By Howard LaFranchi.	1	coalition holds efforts citiesus surgical strikes continue fallujah samarra tal afar iraqi forces ready launch major attacks howard lafranchi	1	0	1	3	4	4	5	7	2	7	6	4	12	7	10	15	9	17	8
Cyprus says could support Turkey EU bidCypriot President Tassos Papadopoulos said Monday he would not oppose Turkish European Union accession talks provided Turkey met European standards.	1	cyprus support turkey eu bidcypriot president tassos papadopoulos monday oppose turkish european union accession talks provided turkey met european standards	1	0	1	4	1	0	6	6	0	4	0	11	5	0	0	9	13	7	4
Conditions in Ohio Point to Kerry, but Bush Runs StrongEverything seemed to be in place for a powerful run by John Kerry in Ohio after Labor Day. Yet polls suggest that Mr. Kerry has actually lost ground.	1	conditions ohio kerry bush runs strongeverything powerful john kerry ohio labor day polls kerry lost ground	1	2	2	4	1	0	6	6	0	4	0	11	0	14	13	8	0	14	7
Chirac Sees Opportunity in China's Economic Surge BEIJING (Reuters) - French President Jacques Chirac declared Saturday that France was a natural trade partner to China and, amid a flurry of air, rail and energy deals, played down any threat from one the world's fastest growing economies.	1	chirac opportunity china economic surge beijing reuters french president jacques chirac declared saturday france natural trade partner china amid flurry air rail energy deals played threat fastest growing economies	1	0	3	2	0	0	6	6	0	4	0	11	5	0	0	9	13	7	4
Israelis kill five Palestinans in Gaza StripIsraeli troops killed five armed Palestinians in the Gaza Strip today as it pressed on with a massive offensive aimed at stopping militants firing rockets into Israel.	1	israelis kill palestinans gaza stripisraeli troops killed armed palestinians gaza strip pressed massive offensive aimed stopping militants firing rockets israel	1	0	1	3	4	4	5	7	2	7	6	4	4	7	7	3	4	10	3
Chirac, in Beijing, Signs Accords to Increase French InvestmentPresident Jacques Chirac of France declared Saturday that France was a natural trade partner for China and, during a flurry of air, rail and energy deals, he played down	1	chirac beijing signs accords increase french investmentpresident jacques chirac france declared saturday france natural trade partner china flurry air rail energy deals played	1	0	3	4	1	0	6	6	0	4	0	11	5	0	0	9	13	7	4
Nigerian Islamist rebels attack police, take officers hostage (AFP)AFP - Islamist rebels have attacked a major police patrol and taken a number of hostages in a remote area of northeastern Nigeria near the Cameroon border, the missing officers' commander told AFP.	1	nigerian islamist rebels attack police officers hostage afp afp islamist rebels attacked major police patrol hostages remote northeastern nigeria cameroon border missing officers commander told afp	1	0	1	3	4	4	5	7	2	7	6	4	4	7	7	5	9	3	3
Afghan Refugees Vote in Pakistan, IranTroops of Pakistani para-military force check Afghan refugee voters before they enter in polling station to vote in Afghanistan #39;s presidential election at Jallozai camp near Peshawar, Pakistan on Saturday, Oct. 9, 2004.	1	afghan refugees vote pakistan irantroops pakistani force check afghan refugee voters enter polling station vote afghanistan presidential election jallozai camp peshawar pakistan saturday	1	0	1	3	4	0	6	6	0	4	0	11	0	14	13	8	0	14	7
Israeli Army Kills 5 Palestinians in GazaJEBALIYA REFUGEE CAMP, Gaza Strip - Israeli soldiers on Saturday shot and killed a Hamas militant whom the military said was responsible for a rocket attack that killed two Israeli preschoolers last week and triggered an army offensive in northern Gaza. Abed Nabhan, 25, was one of five Palestinians killed Saturday in the continuing Israeli operation in nor…	1	israeli army kills palestinians gazajebaliya refugee camp gaza strip israeli soldiers saturday shot killed hamas militant military responsible rocket attack killed israeli preschoolers week triggered army offensive northern gaza abed nabhan palestinians killed saturday continuing israeli operation northern gaza	1	0	1	3	4	4	5	7	2	7	6	4	4	7	7	3	4	10	3
Early Voters Transform Campaign Landscape (AP)AP - In an election year when just a few thousand votes in a few states could decide the winner, the growing number of voters who cast ballots weeks before Election Day is transforming the landscape for political campaigns.	1	voters transform campaign landscape ap ap election votes decide winner growing voters cast ballots weeks election day transforming landscape political campaigns	1	0	1	4	1	0	6	6	0	4	0	11	0	14	13	8	0	14	7
Cocoa prices down but Ivorian exports still blockedWorld cocoa prices were down on Tuesday but off the day #39;s lows as exports remained on hold after mob violence and military clashes in Ivory Coast, the key global supplier, traders said.	1	cocoa prices ivorian exports blockedworld cocoa prices tuesday day lows exports remained hold mob violence military clashes ivory coast key global supplier traders	1	0	3	2	0	6	4	8	9	10	11	12	11	3	6	16	17	18	12
Mauritania coup kingpin heldNouakchott, Mauritania - Authorities said on Saturday they arrested the alleged ringleader of a string of foiled coup and assassination attempts against Mauritania #39;s leaders.	1	mauritania coup kingpin heldnouakchott mauritania authorities saturday arrested alleged ringleader string foiled coup assassination attempts mauritania leaders	1	0	1	3	4	4	3	2	2	7	8	5	7	8	11	13	6	15	10
Website posts video of suicide attack against British troopsA video purportedly showing a suicide attack against British troops last week was posted on an Islamic website. Soldiers from Britain #39;s Black Watch regiment were manning a vehicle checkpoint south of Baghdad	1	website posts video suicide attack british troopsa video purportedly suicide attack british troops week posted islamic website soldiers britain black watch regiment manning vehicle checkpoint south baghdad	1	0	1	3	4	4	5	7	2	7	6	5	12	7	9	15	9	3	8
Bush, Kerry Seek to Claim Victory in Ohio (AP)AP - Chatter about President Bush and Democrat John Kerry was going strong above the whir of spin cycles at the Soapbox laundry, the debate reflecting the presidential race in a must-win state for both candidates.	1	bush kerry seek claim victory ohio ap ap chatter president bush democrat john kerry strong whir spin cycles soapbox laundry debate reflecting presidential race candidates	1	0	1	4	1	0	6	6	0	4	0	11	0	14	13	8	0	14	7
Militia to Hand Weapons to Iraq PoliceBAGHDAD, Iraq - Followers of radical Shiite cleric Muqtada al-Sadr said Saturday they will begin handing weapons over to Iraqi police next week in a major step toward ending weeks of fighting with American soldiers in Baghdad's Sadr City district. Meanwhile, there were reports that British hostage Kenneth Bigley tried to escape before he was beheaded...	1	militia hand weapons iraq policebaghdad iraq followers radical shiite cleric muqtada saturday handing weapons iraqi police week major step weeks fighting american soldiers baghdad sadr city district reports british hostage kenneth bigley escape beheaded	1	0	1	3	4	4	5	7	2	7	8	5	12	7	10	15	9	17	8
Cayman Islands hit by hurricaneThe full force of Hurricane Ivan has hit the Cayman Islands, ripping up homes and causing extensive flooding. Up to 40,000 residents - including a large British expat community - hid in homes and shelters to try and escape Ivan #39;s ferocious 155mph winds.	1	cayman islands hit hurricanethe force hurricane ivan hit cayman islands ripping homes causing extensive flooding residents including british expat community homes shelters escape ivan ferocious 155mph winds	1	0	1	3	4	4	5	7	2	7	6	4	4	11	12	5	9	12	11
U.S. Says N.Korea Blast Probably Not Nuclear SEOUL (Reuters) - A huge explosion rocked North Korea last week but U.S. and South Korean officials said on Sunday it was unlikely to have been a nuclear weapons test despite the appearance of a "peculiar cloud" over the area.	1	blast nuclear seoul reuters huge explosion rocked north korea week south korean officials sunday nuclear weapons test appearance peculiar cloud	1	0	1	3	4	0	6	6	0	4	0	11	5	0	0	9	13	7	4
Five killed, 30 hurt in Kashmir car explosion :India News gt; Pattan/Srinagar, Oct.9 : A suicide bomber rammed a car packed with explosives into an army convoy in Kashmir today, killing four soldiers and a civilian and wounding 30 more, police said.	1	killed hurt kashmir car explosion india news gt suicide bomber rammed car packed explosives army convoy kashmir killing soldiers civilian wounding police	1	0	1	3	4	4	5	7	2	7	6	4	4	7	7	5	9	3	3
Orthodox patriarch killed in Greek air crashATHENSEgypt #39;s Patriarch of Alexandria, whose post traces its lineage to one of Christ #39;s disciples, was killed with his Greek Orthodox retinue yesterday in a helicopter crash, Greek authorities confirmed.	1	orthodox patriarch killed greek air crashathensegypt patriarch alexandria post traces lineage christ disciples killed greek orthodox retinue yesterday helicopter crash greek authorities confirmed	1	0	1	3	4	4	5	7	2	7	6	4	4	7	7	5	9	3	3
Turkey unlikely to join EU before 2015: commissioner Verheugen (AFP)AFP - Turkey is unlikely to join the European Union before 2015, EU enlargement commissioner Guenter Verheugen said in an interview.	1	turkey join eu commissioner verheugen afp afp turkey join european union eu enlargement commissioner guenter verheugen interview	1	0	1	4	1	0	6	6	0	4	0	11	5	0	0	9	13	7	4
Lawmakers Try to OK Hurricane-Drought Aid (AP)AP - Lawmakers scrambled to approve a #36;14 billion package to aid hurricane and drought victims Thursday, driven by warnings that relief money was running out and a need to pass legislation before the planned departure of Congress at the end of this week for the election.	1	lawmakers aid ap ap lawmakers scrambled approve billion package aid hurricane drought victims thursday driven warnings relief money running pass legislation planned departure congress week election	1	0	1	4	1	0	6	6	0	4	0	11	0	14	13	8	0	14	7
The reforms that Putin announcedRussian President Vladimir Putin has announced a series of measures to strengthen central state powers following the hostage-taking at Beslan when more than 300 people died.	1	reforms putin announcedrussian president vladimir putin announced series measures strengthen central powers beslan people died	1	0	1	4	1	0	6	6	0	4	0	11	5	0	0	5	9	3	4
Gunmen Seize Three Britons in Baghdad (Reuters)Reuters - Three British nationals, believed to be\civilians, were snatched by gunmen from a house in central\Baghdad early on Thursday, Iraq's Interior Ministry said.	1	gunmen seize britons baghdad reuters reuters british nationals believed snatched gunmen house thursday iraq interior ministry	1	0	1	3	4	4	5	7	2	7	8	5	12	7	9	15	9	3	8
U.S. Report Undercuts Bush War RationaleWASHINGTON - Undercutting the Bush's administration's rationale for invading Iraq, the final report of the chief U.S. arms inspector concludes that Saddam Hussein did not vigorously pursue a program to develop weapons of mass destruction after international inspectors left Baghdad in 1998, according to lawmakers and others briefed on the report...	1	report undercuts bush war rationalewashington undercutting bush administration rationale invading iraq final report chief arms inspector concludes saddam hussein vigorously pursue program develop weapons mass destruction international inspectors left baghdad lawmakers briefed report	1	0	1	4	1	0	6	6	0	4	0	11	5	0	0	9	13	7	4
Turkey Faces Long Road to EU MembershipThe European Commission #39;s cautious recommendation that Turkey begin membership negotiations puts the country a step closer to realizing its dream of joining Europe -- but	1	turkey road eu membershipthe european commission cautious recommendation turkey membership negotiations country step closer realizing dream joining europe	1	0	1	4	1	0	6	6	0	4	0	11	5	0	0	9	13	7	4
Saudis Take a Small Dose of DemocracyFor the first time in 41 years, Saudi Arabia is allowing local elections. The ruling family's goal, political analysts and diplomats say, is to determine whether a more open government might help defuse a rising armed threat by Muslim militants in the kingdom.	1	saudis dose democracyfor time saudi arabia allowing local elections ruling family goal political analysts diplomats determine government defuse rising armed threat muslim militants kingdom	1	0	1	3	4	0	6	6	2	7	8	5	12	7	9	15	0	14	8
Democrats Seek Louder Voice From EdwardsAt a time when Vice President Dick Cheney has been mocking John Kerry, John Edwards has adopted a lower-profile stance.	1	democrats seek louder voice edwardsat time vice president dick cheney mocking john kerry john edwards stance	1	0	1	4	1	0	6	6	0	4	0	11	0	14	13	8	0	14	7
Iraq #39;s Government in Talks with Sunni, Shi #39;ite LeadersIraq #39;s interim government is engaged in cease-fire talks with Sunni and Shi #39;ite leaders in an effort to restore calm to violent parts of Iraq before January #39;s scheduled election.	1	iraq government talks sunni shi ite leadersiraq interim government engaged talks sunni shi ite leaders effort restore calm violent iraq january scheduled election	1	0	1	3	4	0	6	6	0	4	0	11	12	0	10	15	13	17	8
Man held for slashing teensBeijing - Chinese police have detained a man who they say murdered eight teenagers and injured four others in a school dormitory overnight, state press said late on Friday.	1	held slashing teensbeijing chinese police detained murdered teenagers injured school dormitory overnight press late friday	1	0	1	3	4	4	5	7	2	7	8	5	4	7	7	5	9	3	3
Plutonium: rising terror threatThe radioactive element could be used to make weapons just as dangerous as enriched uranium bombs.	1	plutonium rising terror threatthe radioactive element weapons dangerous enriched uranium bombs	1	0	1	4	4	0	6	6	0	4	8	5	5	0	0	9	13	7	4
Karzai's Running Mate Survives AttackKABUL, Afghanistan - Campaigning for Afghanistan's first direct presidential election ended with a burst of violence Wednesday as attackers set off a bomb in a failed effort to kill interim Afghan leader Hamid Karzai's vice presidential running-mate. Despite persistent violence, the United Nations declared this hard-luck nation ready for Saturday's vote, a his…	1	karzai running mate survives attackkabul afghanistan campaigning afghanistan direct presidential election burst violence wednesday attackers set bomb failed effort kill interim afghan leader hamid karzai vice presidential persistent violence united nations declared nation ready saturday vote historic experiment democracy decades unrelenting ruin soviet occupation civil war repressive taliban thun…	1	0	1	4	1	0	6	6	0	4	0	11	0	14	13	8	0	14	7
Jamaica Searches for Dozens of Fishermen After IvanJamaican military forces searched on Wednesday for dozens of fishermen feared missing after Hurricane Ivan #39;s strike on the Caribbean island last weekend, officials said.	1	jamaica searches dozens fishermen ivanjamaican military forces searched wednesday dozens fishermen feared missing hurricane ivan strike caribbean island weekend officials	1	0	1	3	4	4	5	7	2	7	6	4	4	11	12	5	9	12	11
Refugees #39; hopes for return will outlive ArafatBEIRUT, Lebanon - Yasser Arafat promised Palestinians he would return them to the homes they lost when Israel was founded in 1948.	1	refugees hopes return outlive arafatbeirut lebanon yasser arafat promised palestinians return homes lost israel founded	1	0	1	3	4	0	6	6	0	4	6	4	4	0	7	3	4	10	3
Sudan agrees peace plan after Blair sets deadlineSudan agreed to a five-point peace plan for the war-torn region of Darfur yesterday after Tony Blair set a three-month deadline for an end to the long-running conflict.	1	sudan agrees peace plan blair sets deadlinesudan agreed peace plan region darfur yesterday tony blair set deadline conflict	1	0	1	4	1	0	6	6	0	4	0	11	5	0	0	9	13	7	4
Guinea-Bissau Soldiers Stage Mutiny, Kill Army ChiefMutinous soldiers demanding pay for peacekeeping duty abroad killed the commander of Guinea-Bissau #39;s armed forces on Wednesday and seized key buildings in the capital of the former Portuguese colony.	1	soldiers stage mutiny kill army chiefmutinous soldiers demanding pay peacekeeping duty abroad killed commander armed forces wednesday seized key buildings capital portuguese colony	1	0	1	3	4	4	5	7	2	7	6	4	4	7	7	15	9	17	3
Kerry Challenges Bush Record on IssuesDETROIT - Sen. John Kerry accused President Bush on Wednesday of presiding over an "excuse presidency," challenging Bush's credibility on jobs, the record national deficit and the war in Iraq...	1	kerry challenges bush record issuesdetroit john kerry accused president bush wednesday presiding excuse presidency challenging bush credibility jobs record national deficit war iraq	1	0	1	4	1	0	6	6	0	4	0	11	0	14	13	8	0	14	7
Mexico Migrant Smugglers Turning to Sea (AP)AP - Migrant smugglers are skirting heightened security along the border by using small boats to shuttle people from the under-supervised Baja coast into Southern California marinas and harbors, already jammed with legal commercial ships and pleasure boat traffic.	1	mexico migrant smugglers sea ap ap migrant smugglers skirting heightened security border boats shuttle people baja coast southern california marinas harbors jammed legal commercial ships pleasure boat traffic	1	0	1	3	5	4	5	7	8	8	1	4	4	11	12	5	9	12	11
Darfur Peace Talks Struggle for Survival ABUJA (Reuters) - Peace talks between Sudan's government and Darfur rebels struggled for survival after one of the two rebel groups said on Wednesday the negotiations had collapsed but left open the chance of resumption.	1	darfur peace talks struggle survival abuja reuters peace talks sudan government darfur rebels struggled survival rebel wednesday negotiations collapsed left chance resumption	1	0	1	3	4	0	6	6	0	4	0	11	5	0	0	9	13	7	4
Stern to Join Sirius Satellite RadioNEW YORK - Howard Stern has long had two words for the Federal Communications Commission - and in 15 months, he can finally utter them on the air. The self-proclaimed "King of All Media," perhaps the most influential radio voice of the last 20 years, is shifting his salacious act to satellite radio and freeing himself from the increasingly harsh glare of federa…	1	stern join sirius satellite radionew york howard stern federal communications commission months finally utter air king media influential radio voice shifting salacious satellite radio freeing increasingly harsh glare federal regulators	0	1	0	4	1	5	0	0	1	0	10	7	3	10	15	0	8	16	19
Sudan Rejects US-Sponsored Darfur ResolutionSudan on Wednesday rejected a US-sponsored UN Security Council draft resolution to punish it over a conflict in its western Darfur region, saying the measure was unfair and lacked balance.	1	sudan rejects darfur resolutionsudan wednesday rejected security council draft resolution punish conflict western darfur region measure unfair lacked balance	1	0	1	4	1	0	6	6	0	4	0	11	5	0	0	9	13	7	4
Ex-Bush Official on Cybersecurity Returns (AP)AP - Howard Schmidt, a highly regarded technology executive who was former special adviser to President Bush for cybersecurity, is returning to work with the Homeland Security Department on efforts to protect the nation's computer networks.	1	official cybersecurity returns ap ap howard schmidt highly regarded technology executive special adviser president bush cybersecurity returning homeland security department efforts protect nation computer networks	1	0	1	4	1	0	6	6	0	4	0	11	0	14	13	8	0	14	7
Chile's Lagos Receives Torture Commission Report&lt;p&gt;&lt;/p&gt;&lt;p&gt; By Ignacio Badal&lt;/p&gt;&lt;p&gt; SANTIAGO, Chile (Reuters) - Chilean President Ricardo Lagosreceived a chilling report on Wednesday from a governmentcommission that interviewed more than 30,000 victims tochronicle for the first time the systematic use of tortureduring Augusto Pinochet's 1973-1990 dictatorship.&lt;/p&g…	1	chile lagos receives torture commission report lt gt lt gt lt gt ignacio badal lt gt lt gt santiago chile reuters chilean president ricardo lagosreceived chilling report wednesday governmentcommission interviewed victims tochronicle time systematic tortureduring augusto pinochet lt gt	0	1	3	4	1	5	3	2	1	0	10	8	7	8	11	13	8	16	0
Chronology of attacks on Westerners in Saudi ArabiaThree suspected Muslim militants gunned down a Briton in the Saudi capital Riyadh on Wednesday, security sources and diplomats said.	1	chronology attacks westerners saudi arabiathree suspected muslim militants gunned briton saudi capital riyadh wednesday security sources diplomats	1	0	1	3	4	4	5	7	2	7	8	5	12	7	9	15	9	3	3
At Least 37 Killed, 52 Hurt in Pakistan Blast MULTAN, Pakistan (Reuters) - At least 37 people were killed and 52 wounded when a car bomb exploded at a rally to commemorate an assassinated religious leader in the central Pakistani city of Multan early on Thursday, police said.	1	killed hurt pakistan blast multan pakistan reuters people killed wounded car bomb exploded rally commemorate assassinated religious leader central pakistani city multan thursday police	1	0	1	3	4	4	5	7	2	7	6	4	4	7	7	5	9	3	3
Howard Stern Says He Plans to Jump to Satellite RadioAfter heavy F.C.C. fines, Howard Stern expects to deliver "my show my way" in the mostly unregulated medium.	1	howard stern plans jump satellite radioafter heavy fines howard stern expects deliver unregulated medium	0	1	0	1	3	3	0	0	6	6	5	7	3	10	15	4	5	8	19
Expansion may lead to divisionThe Asia-Europe Meeting, ASEM, will hold its fifth summit in Hanoi in October amidst a recent crisis over the inclusion of Myanmar.	1	expansion lead divisionthe meeting asem hold summit hanoi october amidst crisis inclusion myanmar	1	0	1	4	1	0	6	6	0	4	0	11	5	0	0	9	13	7	4
Forecast Frosty for U.S.-Canadian Ties TORONTO -- The weather won't be the only thing that's cool when President Bush visits neighboring Canada next week.	1	forecast frosty ties toronto weather wo cool president bush visits neighboring canada week	1	0	3	4	1	0	6	6	0	4	0	11	0	14	13	8	0	14	7
Analysis: Iran #39;s missile capabilitiesIran has announced it has improved its missile capabilities by developing a medium-range ballistic missile, with abilities to work on longer range systems -- a steady progress that	1	analysis iran missile capabilitiesiran announced improved missile capabilities developing ballistic missile abilities range systems steady progress	0	1	0	1	3	3	7	3	6	9	7	9	6	13	5	7	14	6	14
Pakistan's Musharraf to Retain Army PostPakistani President Pervez Musharraf will stay on as chief of the army staff beyond the date he promised to give up the post, the information minister said on Wednesday.	1	pakistan musharraf retain army postpakistani president pervez musharraf stay chief army staff promised post minister wednesday	1	0	1	4	1	0	6	6	0	4	0	11	0	0	0	3	4	14	4
India test-fires missileNEW DELHI, Nov 26: India on Friday test fired Akash, the indigenously developed surface-to-air missile from the Integrated Test Range at Chandipur-on-sea, about 14km from Balasore (Orissa).	1	india missilenew delhi nov india friday test fired akash indigenously developed missile integrated test range 14km balasore orissa	0	1	0	1	3	3	7	3	6	4	5	6	5	0	5	9	13	7	4
Hussein Beat Sanctions With BribesSaddam Hussein made \$11 billion in illegal income and eroded the world's toughest economic embargo during his final years as Iraq's leader through shrewd schemes to secretly buy off dozens of countries, top foreign officials and major international figures, said a new report by the chief U.S. weapons inspector released yesterday.	1	hussein beat sanctions bribessaddam hussein billion illegal income eroded toughest economic embargo final iraq leader shrewd schemes secretly buy dozens countries top foreign officials major international figures report chief weapons inspector released yesterday	1	0	1	4	1	0	6	6	0	4	0	5	5	0	0	9	13	7	4
2 Ex-Officers Nabbed in Venezuela SlayingNational Guard troops arrested two brothers Friday in connection with a state prosecutor's killing, just days after two suspects in the car bombing case were shot dead by police, authorities said.	1	nabbed venezuela slayingnational guard troops arrested brothers friday connection prosecutor killing days suspects car bombing shot dead police authorities	1	0	1	3	4	4	5	7	2	7	6	4	4	7	7	5	9	3	3
Bush Urges Putin Uphold Russian Democracy (Reuters)Reuters - President Bush on Wednesday urged\Russian President Vladimir Putin to "uphold the principles of\democracy" in a carefully worded message expressing concern\about Putin's proposed political reforms.	1	bush urges putin uphold russian democracy reuters reuters president bush wednesday president vladimir putin uphold principles carefully worded message expressing putin proposed political reforms	1	0	1	4	1	0	6	6	0	4	0	11	0	14	13	8	0	14	7
World Population to Rise to 8.9 BillionAlthough world families are getting smaller in many regions, the 50 poorest countries are expected to triple in size to 1.7 billion people by 2050, posing many challenges for world countries.	1	population rise billionalthough families regions poorest countries expected triple size billion people posing challenges countries	0	1	3	2	0	6	4	8	9	10	11	12	5	0	0	9	17	18	4
Intel Officials Have Bleak View for IraqWASHINGTON - The National Intelligence Council presented President Bush this summer with several pessimistic scenarios regarding the security situation in Iraq, including the possibility of a civil war there before the end of 2005. In a highly classified National Intelligence Estimate, the council looked at the political, economic and security situation in …	1	intel officials bleak view iraqwashington national intelligence council president bush summer pessimistic scenarios security situation iraq including possibility civil war highly classified national intelligence estimate council looked political economic security situation country determined stability iraq tenuous	1	0	1	4	1	0	6	6	0	4	0	11	0	14	13	8	0	14	7
Briton Shot Dead by Saudi Shopping Center (AP)AP - A Briton who was shot dead outside a Saudi shopping center has been identified as an employee of the communications company Marconi.	1	briton shot dead saudi shopping center ap ap briton shot dead saudi shopping center identified employee communications company marconi	1	0	1	3	4	4	5	7	2	7	6	4	4	7	7	5	9	3	3
Freedom on the March in Iraq, Bush Tells Voters (Reuters)Reuters - President Bush said on\Thursday freedom was on the march in Iraq even as a U.S.\intelligence report depicted a bleak outlook for the country's\future.	1	freedom march iraq bush tells voters reuters reuters president bush freedom march iraq report depicted bleak outlook	1	0	1	4	1	0	6	6	0	4	0	11	0	14	13	8	0	14	7
Arafat dead at 75PARIS -- Yasser Arafat, who triumphantly forced his people's plight into the world spotlight but failed to achieve his lifelong quest for Palestinian statehood, died this morning at a French hospital, the chief doctor at the hospital said. He was 75.	1	arafat dead 75paris yasser arafat triumphantly forced people plight spotlight failed achieve lifelong quest palestinian statehood died morning french hospital chief doctor hospital	1	0	1	3	4	4	5	7	2	7	6	4	4	7	7	3	4	10	3
Eight children stabbed to death as they sleepA man broke into a school dormitory and stabbed eight sleeping children to death before fleeing. The murders at the Ruzhou No2 Senior Middle School in Pingdingshan, in the central province of Henan, was the	1	children stabbed death sleepa broke school dormitory stabbed sleeping children death fleeing murders ruzhou no2 senior middle school pingdingshan central province henan	1	0	1	3	4	4	5	7	2	7	6	4	4	7	7	5	9	3	3
Sharon acknowledges ignoring road mapPrime Minister Ariel Sharon acknowledged that Israel was not following the moribund Mideast peace plan, and said an Israeli pullout from the Gaza Strip was unlikely to revive it, according	1	sharon acknowledges ignoring road mapprime minister ariel sharon acknowledged israel moribund mideast peace plan israeli pullout gaza strip revive	1	0	1	3	4	0	6	6	0	4	0	11	4	14	7	3	4	10	3
Darfur rebel group promises to respect truceOne rebel group in Sudan #39;s troubled Darfur region Thursday pledged to fully respect a truce with the Sudanese government amid contradictory statements and international concern about an escalation in fighting.	1	darfur rebel promises respect truceone rebel sudan troubled darfur region thursday pledged respect truce sudanese government amid contradictory statements international concern escalation fighting	1	0	1	3	4	0	6	6	0	4	0	11	5	0	10	9	13	7	4
Row over Australian army photoA picture of Australian troops dressed as members of the Ku Klux Klan stirs accusations of racism.	1	row australian army photoa picture australian troops dressed ku klux klan stirs accusations racism	1	0	1	3	4	4	5	7	2	7	6	5	12	7	7	15	9	3	3
450 Colombian Paramilitaries Disarm (AP)AP - Some 450 right-wing paramilitary fighters left Colombia's crowded battlefields, turning in their weapons and asking society to let them back into its fold.	1	colombian paramilitaries disarm ap ap paramilitary fighters left colombia crowded battlefields weapons society fold	1	0	1	3	4	4	5	7	2	7	6	5	12	0	10	15	13	17	8
Russian Duma to launch new school massacre probeRussia will launch a second parliamentary inquiry into the Beslan school hostage massacre, Duma speaker Boris Gryzlov said on Thursday, marking a further climbdown by authorities who initially ruled out a probe.	1	russian duma launch school massacre proberussia launch parliamentary inquiry beslan school hostage massacre duma speaker boris gryzlov thursday marking climbdown authorities initially ruled probe	1	0	1	3	5	4	3	2	8	8	8	0	8	6	4	4	15	0	17
Afghans rocky road to historic electionsKALAKAN, Afghanistan There were toothless old men, turbaned and gray-bearded, and young men not yet old enough to shave. There were mullahs and mujahedeen, and the presidential candidate #39;s 3-year-old son.	1	afghans rocky road historic electionskalakan afghanistan toothless turbaned shave mullahs mujahedeen presidential candidate son	1	0	1	4	1	0	6	6	0	4	0	11	0	14	13	8	0	14	7
Ford to Return Electric Cars to Norway (AP)AP - Ford Motor Co. agreed to return about 300 Norwegian-built electric cars to the Nordic country after protests about plans to scrap them, the country's transport minister said Thursday.	1	ford return electric cars norway ap ap ford motor agreed return electric cars nordic country protests plans scrap country transport minister thursday	1	0	1	4	1	0	0	0	0	4	10	7	3	10	15	0	5	8	18
Hurricane Ivan Blasts Alabama, Kills 12GULF SHORES, Ala. - Hurricane Ivan slammed ashore early Thursday with winds of 130 mph, packing deadly tornadoes and a powerful punch of waves and rain that threatened to swamp communities from Louisiana to the Florida Panhandle...	1	hurricane ivan blasts alabama kills 12gulf shores hurricane ivan slammed ashore thursday winds mph packing deadly tornadoes powerful punch waves rain threatened swamp communities louisiana florida panhandle	1	0	1	3	5	4	5	7	8	8	6	4	4	11	12	5	9	12	11
Top Zarqawi Aide Captured in IraqA lieutenant of Iraq's most feared insurgent leader, Abu Musab Zarqawi, was captured this week, the country's national security minister said Thursday.	1	top zarqawi aide captured iraqa lieutenant iraq feared insurgent leader abu musab zarqawi captured week country national security minister thursday	1	0	1	3	4	4	5	7	2	7	8	5	12	7	9	15	6	15	8
Iran Denies Any Nuclear Activity At Suspect Site ParchinVIENNA (AFP) - Iran denied that it had carried out any nuclear-related activity at the Parchin military site which is the subject of US and UN concern.	1	iran denies nuclear activity suspect site parchinvienna afp iran denied carried activity parchin military site subject concern	1	0	1	4	1	0	6	6	0	4	8	5	5	0	0	9	13	7	4
Iran #39;committed #39; to nuke freezeIran #39;s chief negotiator to the United Nations nuclear agency says Tehran is committed to the freeze on uranium enrichment agreed earlier this month.	1	iran committed nuke freezeiran chief negotiator united nations nuclear agency tehran committed freeze uranium enrichment agreed earlier month	1	0	1	4	1	0	6	6	0	4	0	11	5	0	0	9	13	7	4
Mounties left in dark by U.S. on deportation of Syrian-born Canadian (Canadian Press)Canadian Press - OTTAWA (CP) - The Mounties provided information on Maher Arar to American authorities but were left in the dark when the U.S. deported the Canadian citizen to Syria, newly released documents show.	1	mounties left dark deportation canadian canadian press canadian press ottawa cp mounties provided maher arar american authorities left dark deported canadian citizen syria newly released documents	1	0	1	4	5	4	3	2	8	8	8	8	7	8	11	13	6	15	10
European Abortion Debate Turns Divisive (AP)AP - European Parliament legislators on Thursday turned a fight over abortion rights in Portugal into an emotional and divisive debate on women's rights and the division between church and state.	1	european abortion debate divisive ap ap european parliament legislators thursday fight abortion rights portugal emotional divisive debate women rights division church	1	0	1	4	1	0	6	6	0	4	0	11	0	14	13	8	0	14	7
Russia agrees to Dalai Lama visit despite certain anger from China (AFP)AFP - Russia will allow Tibet's exiled spiritual leader, the Dalai Lama, to visit a southern Buddhist Russian region for the first time, the foreign ministry said in a move certain to anger China.	1	russia agrees dalai lama visit anger china afp afp russia tibet exiled spiritual leader dalai lama visit southern buddhist russian region time foreign ministry move anger china	1	0	1	4	4	0	6	6	0	4	0	11	5	0	0	9	13	7	4
US Plutonium Shipment Reaches FranceWorking under tight security from helicopters and police, port crews unloaded US military plutonium from a British ship on Wednesday after its arrival in northwest France, nuclear industry officials said.	1	plutonium shipment reaches franceworking tight security helicopters police port crews unloaded military plutonium british ship wednesday arrival northwest france nuclear industry officials	1	0	1	3	4	4	5	7	2	7	6	4	4	7	7	5	6	15	3
Iraq war allies lash out at AnnanKey allies in the US-led war in Iraq reject UN chief Kofi Annan's assertion that the invasion was illegal.	1	iraq war allies lash annankey allies war iraq reject chief kofi annan assertion invasion illegal	1	0	1	4	1	0	6	6	0	4	0	11	5	0	0	9	13	7	4
Specter Wants to Make Case to Lead SJC (AP)AP - Sen. Arlen Specter, R-Pa., wants to make his case to be chairman of the Senate Judiciary Committee directly to the panel's GOP members next week.	1	specter lead sjc ap ap arlen specter chairman senate judiciary committee directly panel gop week	1	0	1	4	1	0	6	6	0	4	0	11	0	14	13	8	0	14	7
Indonesian militant sentenced to 12 years in Marriott hotel &lt;b&gt;...&lt;/b&gt;: An Indonesian court sentenced a Muslim militant to 12 years in jail on Thursday after finding him guilty of involvement in last year #39;s JW Marriott hotel bombing in Jakarta.	1	indonesian militant sentenced marriott hotel lt gt lt gt indonesian court sentenced muslim militant jail thursday finding guilty involvement jw marriott hotel bombing jakarta	1	0	1	3	4	4	5	7	2	7	8	5	12	8	9	13	6	15	10
Fallujah 'Hostage Slaughterhouses' Found (AP)AP - U.S. troops, on the verge of gaining control of the city, fought pockets of resistance in this former militant stronghold Wednesday and uncovered what the Iraqi commander said were "hostage slaughterhouses" in which foreign captives had been killed.	1	fallujah slaughterhouses ap ap troops verge gaining control city fought pockets resistance militant stronghold wednesday uncovered iraqi commander hostage slaughterhouses foreign captives killed	1	0	1	3	4	4	5	7	2	7	6	5	12	7	10	15	9	17	8
Ya #39;alon: IDF is in advanced stages of preparation for Gaza pulloutThe army is in a very advanced stage of preparations for a withdrawal from the Gaza Strip and four small West Bank settlements in 2005, Israel Defense Forces Chief of Staff, Lieutenant	1	ya alon idf advanced stages preparation gaza pulloutthe army advanced stage preparations withdrawal gaza strip west bank settlements israel defense forces chief staff lieutenant	1	0	1	3	4	4	5	7	2	7	6	4	4	7	7	3	4	10	3
Four employees of British security firm slain by mortar attack in &lt;b&gt;...&lt;/b&gt;A mortar attack killed four employees of a British security firm and wounded 15 others in the Baghdad #39;s Green Zone, a fortified area that houses the	1	employees british security firm slain mortar attack lt gt lt gt mortar attack killed employees british security firm wounded baghdad green zone fortified houses	1	0	1	3	4	4	5	7	2	7	6	4	4	7	7	5	9	3	3
Briton, two Americans kidnapped in Baghdad (AFP)AFP - Two Americans and a Briton were abducted from their home in a plush Baghdad district at dawn, in the latest blow in Iraq's five-month-old foreign hostage crisis, the interior ministry said.	1	briton americans kidnapped baghdad afp afp americans briton abducted plush baghdad district dawn blow iraq foreign hostage crisis interior ministry	1	0	1	3	4	4	5	7	2	7	8	5	12	7	9	15	6	17	8
Parties call for postponement of electionsDespite a new call Friday for a postponement of the Iraqi elections, President Bush said he hopes they still go forward. Seventeen political parties say the election should be put off for at least six months	1	parties call postponement electionsdespite call friday postponement iraqi elections president bush hopes forward seventeen political parties election months	1	0	1	4	1	0	6	6	0	4	0	11	0	14	13	8	0	14	7
Russia's Putin once again heads ex-Soviet bloc (AFP)AFP - President Vladimir Putin took over once again as head of the CIS ex-Soviet bloc at a summit in the Kazakh capital Astana, the Interfax news agency reported.	1	russia putin heads bloc afp afp president vladimir putin head cis bloc summit kazakh capital astana interfax news agency reported	1	0	1	4	1	0	6	6	0	4	0	11	5	0	0	9	13	7	4
Afghan court convicts US trio of tortureKABUL, Afghanistan -- Three Americans -- led by a former Green Beret who boasted he had Pentagon support -- were found guilty yesterday of torturing Afghans in a private jail and were sentenced to prison.	1	afghan court convicts trio torturekabul afghanistan americans led green beret boasted pentagon support guilty yesterday torturing afghans private jail sentenced prison	1	0	1	4	1	4	3	2	1	0	8	5	12	8	9	13	6	15	10
India test-fires surface-to air missileIndia has successfully test-fired a surface-to-air missile from a site in the eastern Orissa state on Friday, a government official said on condition of anonymity.	1	india air missileindia missile site eastern orissa friday government official condition anonymity	1	0	1	3	4	0	6	6	0	4	0	11	5	0	0	9	13	3	4
Assembly debates Musharraf rolePakistan's national assembly is due to debate whether President Musharraf should step down as army leader.	1	assembly debates musharraf rolepakistan national assembly debate president musharraf step army leader	1	0	1	4	1	0	6	6	0	4	0	11	0	14	13	8	0	14	7
UN Says More Money Needed for Population ProgramsThe United Nations released its annual population report on Wednesday, and it said it needs more money for population programs. A top United Nations official says if more money isn #39;t found for population programs	1	money population programsthe united nations released annual population report wednesday money population programs top united nations official money isn population programs	1	1	1	4	1	0	6	6	0	4	0	11	5	0	0	9	13	7	4
Bush 'picks new attorney general'White House legal counsel Alberto Gonzales is the president's choice for attorney general, sources say.	1	bush attorney house legal counsel alberto gonzales president choice attorney sources	1	0	1	4	1	5	3	2	1	0	0	8	0	14	13	8	0	14	7
Iran, EU Negotiators Seek Nuke Agreement (AP)AP - A key U.N. atomic agency meeting adjourned for the weekend, giving Iran time to consider a total freeze of a program that could make weapons grade uranium and for delegates to decide on further steps in policing Tehran's nuclear activities.	1	iran eu negotiators seek nuke agreement ap ap key atomic agency meeting adjourned weekend iran time total freeze program weapons grade uranium delegates decide steps policing tehran nuclear activities	1	0	1	4	1	0	6	6	0	4	0	11	5	0	0	9	13	7	4
Observers warn militant groups may exploit bitterness in &lt;b&gt;...&lt;/b&gt;NARATHIWAT, Thailand : The deaths and beatings that followed last month #39;s demonstration in southern Thailand have left an indelible mark on the psyche of the Muslims living	1	observers warn militant exploit bitterness lt gt lt gt narathiwat thailand deaths beatings month demonstration southern thailand left indelible mark psyche muslims living	1	0	1	3	4	4	5	7	2	7	6	4	4	7	7	5	9	3	3
Dalai Lama Envoy Visits China for Autonomy Talks WASHINGTON (Reuters) - The Dalai Lama's special envoy has arrived in China for talks on the exiled spiritual leader's aspirations for Tibetan autonomy, the third such visit in three years, officials in Washington said on Tuesday.	1	dalai lama envoy visits china autonomy talks washington reuters dalai lama special envoy arrived china talks exiled spiritual leader aspirations tibetan autonomy visit officials washington tuesday	1	0	1	4	1	0	6	6	0	4	0	11	5	0	0	9	13	7	4
San Juan Airport Shuttered for an Hour (AP)AP - San Juan's international airport was closed for more than an hour Thursday morning after bomb-sniffing dogs alerted police to a suspicious piece of luggage, authorities said.	1	san juan airport shuttered hour ap ap san juan international airport closed hour thursday morning dogs alerted police suspicious piece luggage authorities	0	0	1	3	5	4	5	7	8	8	1	0	8	6	4	4	15	0	17
Official: FARC Sought Bush AssassinationColombia's main rebel group asked followers to mount an assassination attempt against President Bush during his visit to Colombia last week, Defense Minister Jorge Uribe said. There was no evidence Saturday that rebels even tried to organize such an attack.	1	official farc sought bush assassinationcolombia main rebel followers mount assassination attempt president bush visit colombia week defense minister jorge uribe evidence saturday rebels organize attack	1	0	1	3	4	0	6	6	0	4	0	11	0	14	10	8	0	14	7
Scotland awaits smoking decisionThe Scottish Cabinet is to meet amid signs it will opt to introduce a ban on smoking in public places.	1	scotland awaits smoking decisionthe scottish cabinet meet amid signs opt introduce ban smoking public	1	0	3	4	1	0	6	6	0	4	0	11	0	2	0	10	10	18	16
Batman visits Buckingham PalaceA security officer stands by as father #39;s rights campaigner Jason Hatch (R), dressed as Batman, protests on a balcony at Buckingham Palace in London, September 13, 2004.	1	batman visits buckingham palacea security officer stands father rights campaigner jason hatch dressed batman protests balcony buckingham palace london september	1	0	1	4	1	0	6	6	0	4	0	11	0	14	13	8	0	14	7
Fallujah Violence Leaves 10 Troops Dead (AP)AP - U.S. troops powered their way into the center of the insurgent stronghold of Fallujah on Tuesday, overwhelming small bands of guerrillas with massive force, searching homes along the city's deserted, narrow passageways and using loudspeakers to try to goad militants onto the streets.	1	fallujah violence leaves troops dead ap ap troops powered center insurgent stronghold fallujah tuesday overwhelming bands guerrillas massive force searching homes city deserted narrow passageways loudspeakers goad militants streets	1	0	1	3	4	4	5	7	2	7	6	4	4	7	10	15	9	17	3
Sudan Peace Talks Resume for South as Tensions Brew KHARTOUM/NAIROBI (Reuters) - Sudan's government resumed talks with rebels in the oil-producing south on Thursday while the United Nations set up a panel to investigate charges of genocide in the west of Africa's largest country.	1	sudan peace talks resume south tensions brew reuters sudan government resumed talks rebels south thursday united nations set panel investigate charges genocide west africa largest country	1	0	1	4	1	0	6	6	0	4	0	11	5	0	0	9	13	7	4
Death bell tolls for Russia's Yukos oil giant (AFP)AFP - Russia's Yukos does not begin the week teetering on the edge of ruin where it has been for months now. The oil giant is flat on its back, gasping for its last breaths of air.	1	death bell tolls russia yukos oil giant afp afp russia yukos week teetering edge ruin months oil giant flat gasping breaths air	0	1	3	2	0	6	4	8	9	10	11	12	11	3	6	16	17	18	12
North Korea Seen as Tying Nuclear Talks to US ElectionNorth Korea is waiting out the American presidential election in order to bargain with the winner over its nuclear weapons program, according to analysts here and a British diplomat who left Pyongyang today.	1	north korea tying nuclear talks electionnorth korea waiting american presidential election bargain winner nuclear weapons program analysts british diplomat left pyongyang	1	0	1	4	1	0	6	6	0	4	0	11	5	0	0	9	13	7	4
Timeline of past 25 years in Afghanistan1979: The Soviet Union sends troops into Afghanistan to support a pro-Moscow regime, sparking a decade-long war with anti-communist forces supplied and trained by the United States.	1	timeline afghanistan1979 soviet union sends troops afghanistan support regime sparking war forces supplied trained united	1	0	1	3	4	0	6	6	0	4	0	11	12	7	10	15	13	17	8
US troops reach centre of Fallujah as 48 killed in Baquba and &lt;b&gt;...&lt;/b&gt;FALLUJAH: Iraqi Prime Minister Ayad Allawi on Tuesday imposed a night curfew in Baghdad as US troops with crack Iraqi soldiers surged into the heart of Fallujah in a hail of explosions and gunfire on the second day of the largest operation in Iraq since	1	troops reach centre fallujah killed baquba lt gt lt gt fallujah iraqi prime minister ayad allawi tuesday imposed night curfew baghdad troops crack iraqi soldiers surged heart fallujah hail explosions gunfire day largest operation iraq	1	0	1	3	4	4	5	7	2	7	6	4	12	7	10	15	9	17	8
SAY NEIGHBORS #39; WEAPONS LEAVE THEM VULNERABLEElectrical engineering student Roozbeh Rahimi reflects a common sentiment among Iranians when he expresses hope that this famous tourist city will gain fame soon for its nuclear technology.	1	neighbors weapons leave vulnerableelectrical engineering student roozbeh rahimi reflects common sentiment iranians expresses hope famous tourist city gain fame nuclear technology	1	0	1	3	4	0	6	6	0	6	5	6	5	0	0	9	13	7	4
Bush won #39;t take Iran #39;s word for itCRAWFORD, Texas As President Bush sees it, quot;the only good deal is one that #39;s verifiable. quot;. He #39;s applauding the efforts of some European countries to get Iran to honor its commitment to refrain from developing nuclear weapons.	1	bush won iran word itcrawford texas president bush quot deal verifiable quot applauding efforts european countries iran honor commitment refrain developing nuclear weapons	1	0	1	4	1	0	6	6	0	4	0	11	5	0	0	9	13	7	4
Employment Picture Expected to ImproveNEW YORK - A rash of job cuts - more than 10,000 layoffs just this week from a handful of companies - has created some gloom on the jobs front. But Friday's release of jobs data for September was expected to show a steady unemployment rate and creation between about 50,000 to 250,000 new jobs, though uncertainties such as the effects of last month's hurricane…	1	employment picture expected improvenew york rash job cuts layoffs week handful companies created gloom jobs front friday release jobs data september expected steady unemployment rate creation jobs uncertainties effects month hurricanes estimates map wachovia corp	0	1	3	2	0	6	4	8	9	10	11	12	11	3	6	16	17	18	12
US Army Deserter Jenkins Obtains Early Release from Detention in &lt;b&gt;...&lt;/b&gt;A former US Army sergeant who defected to North Korea almost 40 years ago - has been released after serving 25 days in military detention in Japan.	1	army deserter jenkins obtains release detention lt gt lt gt army sergeant defected north korea ago released serving days military detention japan	1	0	1	3	4	4	5	7	2	7	8	5	12	8	9	13	6	15	10
FDA OKs Scientist Publishing Vioxx Data (AP)AP - The Food and Drug Administration has given a whistle-blower scientist permission to publish data indicating that as many as 139,000 people had heart attacks that may be linked to Vioxx, the scientist's lawyer said Monday.	1	fda oks scientist publishing vioxx data ap ap food drug administration scientist permission publish data indicating people heart attacks linked vioxx scientist lawyer monday	1	0	1	4	5	5	3	2	8	8	1	8	7	2	11	10	10	13	16
Sri Lanka army blames Tamil Tigers of failing to keep pledgeSri Lanka #39;s army Sunday blamed theTamil Tigers for failing to attend a meeting Saturday which they had agreed to attend during a meeting with the international trucemonitors and the government troops.	1	sri lanka army blames tamil tigers failing pledgesri lanka army sunday blamed thetamil tigers failing attend meeting saturday agreed attend meeting international trucemonitors government troops	1	0	1	3	4	4	6	6	2	7	6	11	5	0	0	3	4	10	4
US Cautious On Progress Toward Enriching UraniumThe United States is responding carefully to Iran #39;s announcement that it has taken a major step toward enriching uranium, a key ingredient in nuclear weapons.	1	cautious progress enriching uraniumthe united responding carefully iran announcement major step enriching uranium key ingredient nuclear weapons	1	0	1	4	1	0	6	6	0	4	0	11	5	0	0	9	13	7	4
Italian PM, Gaddafi open gas pipeline in new era of #39;friendship #39;MELLITAH, Libya : Italia #39;s Prime Minister Silvio Berlusconi and Libyan leader Muammar Gaddafi opened a gas pipeline between their countries in a new era of quot;friendship and cooperation quot; across the Mediterranean.	1	italian pm gaddafi gas pipeline era friendship mellitah libya italia prime minister silvio berlusconi libyan leader muammar gaddafi gas pipeline countries era quot friendship cooperation quot mediterranean	1	0	1	4	1	0	6	6	0	4	0	11	5	0	0	9	13	7	4
Iranian nuclear plans #39;unclear #39;The head of the UN #39;s nuclear watchdog says he has seen no firm evidence Iran is secretly developing nuclear weapons. But International Atomic Energy Agency chief Mohamed El-Baradei said he could not yet give	1	iranian nuclear plans unclear head nuclear watchdog firm evidence iran secretly developing nuclear weapons international atomic energy agency chief mohamed	1	0	1	4	1	0	6	6	0	4	0	11	5	0	0	9	13	7	4
Karzai Uncle Sam #39;s manWASHINGTON, October 08 (Online): As Afghans prepare for their first presidential elections on October 9, President Hamid Karzai, a Pashtun, is being challenged by over a dozen factional leaders, but most Afghans and international officials expect him to	1	karzai uncle sam manwashington october online afghans prepare presidential elections october president hamid karzai pashtun challenged dozen factional leaders afghans international officials expect	1	0	1	4	1	0	6	6	0	4	0	11	0	14	13	8	0	14	7
A target for terroristsAn election campaign parades the political divide in the community. Yesterday, amid the extraordinary uncertainty about whether Australians had been taken hostage in Iraq, we saw the glue that unites the two sides of politics.	1	target terroristsan election campaign parades political divide community yesterday amid extraordinary uncertainty australians hostage iraq glue unites politics	1	0	1	4	1	0	6	6	0	4	0	5	0	14	13	8	0	14	7
Rwandan #39;motivated by riches #39;Ouagadougou - Rwanda #39;s threat to launch military strikes in Democratic Republic of Congo would be motivated by the abundant mineral wealth in its giant western neighbour not by the desire to attack Hutu fighters based there, a Congolese diplomat said here	1	rwandan motivated riches ouagadougou rwanda threat launch military strikes democratic republic congo motivated abundant mineral wealth giant western neighbour desire attack hutu fighters based congolese diplomat	1	0	1	3	4	4	5	7	2	7	6	4	4	7	10	15	9	17	8
U.S. Alerts Schools About Terror ThreatWASHINGTON - The Education Department has advised school leaders nationwide to watch for people spying on their buildings or buses to help detect any possibility of terrorism like the deadly school siege in Russia. The warning follows an analysis by the FBI and the Homeland Security Department of the siege that killed nearly 340 people, many of them students…	1	alerts schools terror threatwashington education department advised school leaders nationwide watch people spying buildings buses detect possibility terrorism deadly school siege russia warning analysis fbi homeland security department siege killed people students city beslan month	1	0	1	3	4	4	5	7	2	7	6	4	4	7	7	5	9	3	3
The king who courted the Khmer Rouge (and survived)The career of King Norodom Sihanouk of Cambodia has been a bewildering trail of political twists and expedient turns. Now the man they call the #39;mercurial monarch #39; has announced his abdication.	1	king courted khmer rouge survived career king norodom sihanouk cambodia bewildering trail political twists expedient call mercurial monarch announced abdication	1	0	1	4	1	0	6	6	0	4	0	11	0	14	13	8	0	14	7
German investor confidence slumped in SeptemberBERLIN - German investor confidence dropped sharply in September, a key economic indicator released Tuesday showed amid concerns about the impact of high oil prices on consumer demand and the outlook for the global economy.	1	german investor confidence slumped septemberberlin german investor confidence dropped sharply september key economic indicator released tuesday amid concerns impact oil prices consumer demand outlook global economy	0	1	3	2	0	6	4	8	9	10	11	12	11	3	6	16	17	18	12
Sinn Fein Says N.Irish Deal Nears; No Bush Call (Reuters)Reuters - The leader of Sinn Fein, Northern\Ireland's main Catholic party and the political ally of the\Irish Republican Army (IRA), said Sunday he believed his\Protestant rivals were ready to agree to a peace deal.	1	sinn fein deal nears bush call reuters reuters leader sinn fein main catholic party political ally republican army ira sunday believed rivals ready agree peace deal	1	0	1	4	1	0	6	6	0	4	0	11	0	14	13	8	0	14	7
Elbaradei, Environmentalist Tipped for Nobel (Reuters)Reuters - Among those tipped to win the 2004 Nobel\Peace Prize on Friday are the U.N. nuclear watchdog and its\leader Mohamed ElBaradei, a Kenyan environmentalist and a\Russian anti-nuclear activist.	1	elbaradei environmentalist tipped nobel reuters reuters tipped win prize friday nuclear watchdog mohamed elbaradei kenyan environmentalist activist	1	0	1	4	5	0	6	6	0	4	0	11	5	0	0	9	13	7	4
The Bag of Aeolus quot;Aeolus was keeper of the winds. He gave a bag of evil winds to Odysseus, instructing him to keep it closed while a good breeze wafted him home.	1	bag aeolus quot aeolus keeper winds bag evil winds odysseus instructing closed breeze wafted	0	2	2	0	5	1	2	1	8	8	1	0	8	11	12	5	15	12	11
French Troops Clash with Ivory Coast Protesters ABIDJAN (Reuters) - French soldiers fired to disperse protesters on Tuesday after days of rioting in Ivory Coast's main city Abidjan as South Africa's President Thabo Mbeki gave an upbeat assessment of a brief peace mission to the country.	1	french troops clash ivory coast protesters abidjan reuters french soldiers fired disperse protesters tuesday days rioting ivory coast main city abidjan south africa president thabo mbeki upbeat assessment peace mission country	1	0	1	3	4	4	5	7	2	7	6	4	4	0	0	9	13	7	4
Annan Urged to Play Larger Role in Iraq (AP)AP - U.N. Secretary-General Kofi Annan, under fire in Congress over a troubled oil program for Iraq, received some friendly advice last month in a private meeting with former U.S. Ambassador Richard Holbrooke and other foreign policy experts.	1	annan urged play larger role iraq ap ap kofi annan fire congress troubled oil program iraq received friendly advice month private meeting ambassador richard holbrooke foreign policy experts	1	0	1	4	1	0	6	6	0	4	0	11	5	0	0	9	13	7	4
Sadr aide freed as Iraq seeks pre-election calmcould help the interim government #39;s efforts to calm rebel-held strongholds before elections due in January. colleague, Sheikh Mahmoud Sudani, after he got out of jail on Thursday.	1	sadr aide freed iraq seeks calmcould interim government efforts calm strongholds elections january colleague sheikh mahmoud sudani jail thursday	1	0	1	3	4	0	6	6	0	4	8	5	12	7	10	15	6	17	8
Pakistan turns up heat on al QaedaPakistani forces have been battling al Qaeda fighters in an ongoing operation to rout terrorists in a tribal area near the border with Afghanistan, Pakistani intelligence sources said.	1	pakistan heat al qaedapakistani forces battling al qaeda fighters ongoing operation rout terrorists tribal border afghanistan pakistani intelligence sources	1	0	1	3	4	4	5	7	2	7	8	5	12	7	9	15	6	15	8
Kidnapped Italian freed in southern Philippines (AFP)AFP - An Italian aid worker walked free from the southern Philippines jungle, a day after he was abducted by local gunmen.	1	kidnapped italian freed southern philippines afp afp italian aid worker walked free southern philippines jungle day abducted local gunmen	1	0	1	3	4	4	5	7	2	7	8	5	12	7	9	15	9	3	8
Turkey is put on track for EU membershipBRUSSELS -- In a historic move that could extend Europe's borders to the edge of the volatile Middle East, the European Union recommended yesterday setting mostly Muslim Turkey on a course for full membership in the prosperous 25-nation bloc.	1	turkey track eu membershipbrussels historic move extend europe borders edge volatile middle east european union recommended yesterday setting muslim turkey membership prosperous bloc	1	0	1	4	1	0	6	6	0	4	0	11	5	0	0	9	13	7	4
France Begins Evacuations From Ivory CoastFrance and the United Nations began evacuating thousands of French and other expatriates Wednesday trapped at U.N. offices and a French military base amid days of anti-foreigner rampages in Ivory Coast's largest city, French and U.N. officials said.	1	france evacuations ivory coastfrance united nations evacuating thousands french expatriates wednesday trapped offices french military base amid days rampages ivory coast largest city french officials	1	0	1	3	4	4	5	7	2	7	6	4	5	0	12	9	13	7	4
Blair: Time for Excuses on Africa Is Over (Reuters)Reuters - British Prime Minister\Tony Blair is to say Thursday that the time for excuses on\Africa is over as he chairs a meeting in Ethiopia he hopes will\turn the continent's problems into a global priority.	1	blair time excuses africa reuters reuters british prime blair thursday time excuses chairs meeting ethiopia hopes continent global priority	1	0	1	4	1	0	6	6	0	4	0	11	5	0	0	9	13	7	4
Milosevic war crimes trial suspendedThe war crimes trial of the former Yugoslav president Slobodan Milosevic was today adjourned for a month after key witnesses refused to appear in protest at the court #39;s decision to appoint defence lawyers.	1	milosevic war crimes trial suspendedthe war crimes trial yugoslav president slobodan milosevic adjourned month key witnesses refused protest court decision appoint defence lawyers	1	0	1	4	1	5	3	2	1	0	8	8	7	8	11	13	6	15	10
Stocks Sink on Coke's Gloomy ForecastNEW YORK - Stocks headed lower Wednesday after beverage giant Coca-Cola Co. issued a gloomy forecast, and a lower-than-expected reading on industrial production for August threw the nation's broader economic outlook into question...	1	stocks sink coke gloomy forecastnew york stocks headed lower wednesday beverage giant issued gloomy forecast reading industrial production august threw nation broader economic outlook question	0	1	3	2	0	6	4	8	9	10	11	12	11	3	6	16	17	18	12
Hurricane Ivan Roars Toward Gulf CoastNEW ORLEANS - Stragglers streamed toward higher ground Wednesday on highways turned into one-way evacuation routes and surf started eroding beaches as Hurricane Ivan roared toward the Gulf Coast with 140 mph wind. Nearly 200 miles wide, Ivan could cause significant damage no matter where it strikes, as hurricane-force wind extended up to 105 miles out from th…	1	hurricane ivan roars gulf coastnew orleans stragglers streamed ground wednesday highways evacuation routes surf started eroding beaches hurricane ivan roared gulf coast mph wind miles wide ivan damage matter strikes wind extended miles center	1	0	1	3	5	4	5	7	8	8	1	0	8	11	12	5	15	12	11
India will never become an international liability: Manmohan Singh &lt;b&gt;...&lt;/b&gt;India News gt; The Hague: The Indian Prime Minister, Dr Manmohan Singh, has said that despite three changes in government in the past 14 years since the economic reforms were introduced in the country, there has been no roll back in the reforms programme.	1	india international liability manmohan singh lt gt lt gt india news gt hague indian prime minister dr manmohan singh government economic reforms introduced country roll reforms programme	1	0	1	4	1	0	6	6	0	4	0	11	5	0	0	9	13	7	4
Backgrounder: Basic facts about ASEANLeaders from members of the Association of Southeast Asian Nations (ASEAN) are gathering in Vientiane, capital of Laos, for a summit meeting among themselves and a series	1	backgrounder basic aseanleaders association southeast asian nations asean gathering vientiane capital laos summit meeting series	1	0	1	4	1	0	6	6	0	4	0	11	5	0	0	9	13	7	4
Acrimony in the air on eve of Northern Ireland talks (AFP)AFP - All-party talks to kickstart Northern Ireland's peace process, in limbo for nearly two years, get underway at Leeds Castle with acrimony already in the air.	1	acrimony air eve northern ireland talks afp afp talks kickstart northern ireland peace process limbo underway leeds castle acrimony air	1	0	1	4	1	0	6	6	0	4	0	11	5	0	0	9	13	7	4
Iraq election delay #39;considered #39;Iraq #39;s electoral commission has said it will consider a request from leading political parties to delay general elections scheduled for 30 January.	1	iraq election delay considered iraq electoral commission request leading political parties delay elections scheduled january	1	0	1	4	1	0	6	6	0	4	0	11	0	14	13	8	0	14	7
Iraq commission examines request to delay pollsBAGHDAD (AFP) - Iraq #39;s electoral commission was due to study a call by top leaders to delay the January 30 polls because of violence gripping the country, as US-led troops continued their anti-insurgency crackdown.	1	iraq commission examines request delay pollsbaghdad afp iraq electoral commission study call top leaders delay january polls violence gripping country troops continued crackdown	1	0	1	4	1	0	6	6	0	4	0	11	0	14	13	15	0	17	8
Earthquake Rocks Indonesia's Bali, One Dead BALI, Indonesia (Reuters) - A powerful earthquake rocked Indonesia's premier tourist island of Bali Wednesday, killing one person, injuring at least two and triggering some panic, officials said.	1	earthquake rocks indonesia bali dead bali indonesia reuters powerful earthquake rocked indonesia premier tourist island bali wednesday killing person injuring triggering panic officials	1	0	1	3	4	4	5	7	2	7	6	4	4	7	7	5	9	3	3
Iran official warns of NPT pull-out if West pressesIran will pull out of the nuclear Non-Proliferation Treaty (NPT) and develop its atomic programme in secret if Western nations threaten or put pressure on Tehran, a senior Iran diplomat was quoted as saying on Wednesday.	1	iran official warns npt west pressesiran pull nuclear treaty npt develop atomic programme secret western nations threaten pressure tehran senior iran diplomat quoted wednesday	1	0	1	4	1	0	6	6	0	4	0	11	5	0	0	9	13	7	4
ASEAN to push Australia, New Zealand to sign non-aggression pact (AFP)AFP - Southeast Asian foreign ministers said they would encourage Australia and New Zealand to accede to a non-aggression pact with their 10-nation ASEAN group that South Korea signed.	1	asean push australia zealand sign pact afp afp southeast asian foreign ministers encourage australia zealand accede pact asean south korea signed	1	0	1	4	1	0	6	6	0	4	0	11	5	0	0	9	13	7	4
Earthquake Rocks Indonesia's Bali, One Dead-Radio JAKARTA (Reuters) - An earthquake rocked Indonesia's premier tourist island of Bali on Wednesday, killing one person and injuring at least two, El Shinta radio reported, quoting hospital officials.	1	earthquake rocks indonesia bali jakarta reuters earthquake rocked indonesia premier tourist island bali wednesday killing person injuring el shinta radio reported quoting hospital officials	1	0	1	3	4	4	5	7	2	7	6	4	4	7	7	5	9	3	3
Musharraf Hopeful For Kashmir SolutionISLAMABAD, Pakistan : Nov 10 (SADA) - President General Pervez Musharraf Tuesday hoped that debate on options he spelt out recently on Kashmir issue would take Pakistan and India closer to find out the settlement of decades-old dispute.	1	musharraf hopeful kashmir solutionislamabad pakistan nov sada president pervez musharraf tuesday hoped debate options spelt kashmir issue pakistan india closer settlement dispute	1	0	1	4	1	0	6	6	0	4	0	11	5	0	0	9	13	7	4
Two U.S. Soldiers Killed in Iraq Bombings (AP)AP - Two American soldiers were killed and two others were wounded in separate bombings that occurred within hours, the U.S. military said Thursday.	1	soldiers killed iraq bombings ap ap american soldiers killed wounded separate bombings occurred hours military thursday	1	0	1	3	4	4	5	7	2	7	6	4	4	7	7	5	9	3	3
LETTER FROM EUROPE The All-Too-Human Hitler, on Your Big ScreenThe release of a major movie about Hitler is, by definition, a remarkable event in Germany, especially if it portrays one of history #39;s great monsters as a human being, given	1	letter europe hitler screenthe release major movie hitler definition remarkable event germany portrays history monsters human	0	1	0	4	5	1	2	1	4	1	2	10	2	9	14	6	12	13	13
In Retaken Iraqi City, Perils LurkU.S. forces have controlled Tall Afar since Sunday, after deadly battles last week. On Tuesday, soldiers, led by an Iraqi known as "The Source," reopened the city and searched for insurgents.	1	retaken iraqi city perils forces controlled tall afar sunday deadly battles week tuesday soldiers led iraqi source reopened city searched insurgents	1	0	1	3	4	4	5	7	2	7	6	4	12	7	10	15	9	17	8
Lethal Bird Flu Reemerges In Four East Asian CountriesThe avian influenza virus that swept across East Asia early this year has reemerged in at least four countries in the region despite optimism among health and agriculture officials that the disease had been eradicated through the mass slaughter of chickens.	1	lethal bird flu reemerges east asian countriesthe avian influenza virus swept east asia reemerged countries region optimism health agriculture officials disease eradicated mass slaughter chickens	1	0	1	4	5	0	6	6	0	4	0	11	5	0	0	9	13	7	4
Asia-Europe Forum Grows, Myanmar Irritates HANOI (Reuters) - An Asia-Europe forum accepted Myanmar and 12 other new members on Thursday ahead of a summit strained by Yangon's human rights record and detention of democracy icon Aung San Suu Kyi.	1	forum grows myanmar irritates hanoi reuters forum accepted myanmar thursday ahead summit strained yangon human rights record detention democracy icon aung san suu kyi	1	0	1	4	1	0	6	6	0	4	0	11	5	0	0	9	13	7	4
Communist Party seeks to win back people #39;s supportTHE Chinese Communist Party (CCP) has read the writing on the wall and is out to shore up its moral right to keep ruling the country.	1	communist party seeks win people supportthe chinese communist party ccp read writing wall shore moral ruling country	1	0	1	4	1	0	6	6	0	4	0	11	0	14	13	8	0	14	7
Labor Allies Want Senate to Block OT Rules (AP)AP - Fresh from their triumph in the House, labor allies want the Senate to derail new Bush administration overtime rules that critics say would prevent 6 million American workers from getting the bonus pay.	1	labor allies senate block ot rules ap ap fresh triumph house labor allies senate derail bush administration overtime rules critics prevent american workers bonus pay	1	0	1	4	1	0	6	6	0	4	0	11	0	14	13	8	0	11	18
Yellowknife parole officer found dead after visiting client in apartment (Canadian Press)Canadian Press - YELLOWKNIFE (CP) - The case of a parole officer apparently killed while she was visiting a client has devastated her colleagues.	1	yellowknife parole officer dead visiting client apartment canadian press canadian press yellowknife cp parole officer killed visiting client devastated colleagues	1	0	1	3	4	4	5	7	2	7	6	4	4	7	7	5	9	3	3
UN aid plane shot at in Ivory CoastAbidjan - A United Nations World Food Programme (WFP) plane was met with gunfire and threats when it arrived in Man, western Ivory Coast, the UN said in a statement on Saturday.	1	aid plane shot ivory coastabidjan united nations food programme wfp plane met gunfire threats arrived western ivory coast statement saturday	1	0	1	3	4	4	5	7	2	7	6	4	5	0	0	9	13	7	4
Same-sex divorce rules still hazyNow that an Ontario couple has been given Canada #39;s first same-sex divorce, experts are divided over just how easy it will be for gays and lesbians in other provinces to end their marriages.	1	divorce rules hazynow ontario couple canada divorce experts divided easy gays lesbians provinces marriages	0	0	1	4	1	5	6	6	1	0	10	11	0	14	13	8	8	14	7
Report: Japan PM Advisers See China Military Threat (Reuters)Reuters - In a move that could further chill ties\between the two Asian powers, an advisory panel to Japan's\prime minister will say China should be described as a military\threat in a defense review, the Nihon Keizai newspaper reported\on Wednesday.	1	report japan pm advisers china military threat reuters reuters move chill asian powers advisory panel minister china defense review nihon keizai newspaper wednesday	1	0	1	4	1	0	6	6	0	4	0	11	5	0	0	9	13	7	4
Rioters firebomb police stationTERRIFIED police have told how they feared they would die as a rampaging mob burnt down the police station in which they were trapped on Palm Island, off north Queensland.	1	rioters firebomb police stationterrified police told feared die rampaging mob burnt police station trapped palm island north queensland	1	0	1	3	4	4	5	7	2	7	6	4	4	7	7	5	9	3	3
Canada defends submarine fleetCanada has defended its decision to buy second-hand submarines after a crewman died from injuries sustained on one of the vessels that had broken down.	1	canada defends submarine fleetcanada defended decision buy submarines crewman died injuries sustained vessels broken	1	0	1	4	5	5	0	0	8	8	1	0	8	11	12	4	15	12	11
U.S. Report: Iraq Didn't Have WMDsWASHINGTON - Saddam Hussein's weapons of mass destruction programs had deteriorated into only hopes and dreams by the time of the U.S.-led invasion last year, a decline wrought by the first Gulf War and years of international sanctions, the chief U.S. weapons hunter found...	1	report iraq wmdswashington saddam hussein weapons mass destruction programs deteriorated hopes dreams time invasion decline wrought gulf war international sanctions chief weapons hunter	1	0	1	4	1	0	6	6	0	4	0	5	5	0	0	9	13	7	4
Iraqi attacks kill at least 69At least 69 people have been killed and scores wounded during a day of carnage in Iraq. In Baghdad, 47 Iraqis died and over 120 were injured in a massive explosion near a police station.	1	iraqi attacks kill 69at people killed scores wounded day carnage iraq baghdad iraqis died injured massive explosion police station	1	0	1	3	4	4	5	7	2	7	6	4	4	7	7	5	9	3	3
Return of Relics to Rekindle Catholic-Orthodox DialogueVATICAN CITY, NOV. 25, 2004 (Zenit.org).- Theological dialogue between the Orthodox and Catholic Churches is expected to resume after the relics of Sts.	1	return relics rekindle dialoguevatican city theological dialogue orthodox catholic churches expected resume relics sts	1	0	1	4	5	0	6	6	0	4	0	11	5	0	0	9	13	7	4
Envoys off to inspect NK blast siteA group of foreign diplomats has left Pyongyang on Thursday to visit the scene of a mysterious explosion in North Korea. quot;They went today.	1	envoys inspect nk blast sitea foreign diplomats left pyongyang thursday visit scene mysterious explosion north korea quot	1	0	1	3	4	0	6	6	0	4	0	11	5	0	0	9	13	7	4
Thousands Demonstrate in Rome for Italian Hostages (Reuters)Reuters - Thousands of Italians marched silently\through Rome in a candlelit procession on Friday to demand the\release of two female aid workers seized in Baghdad.	1	thousands demonstrate rome italian hostages reuters reuters thousands italians marched rome candlelit procession friday demand female aid workers seized baghdad	1	0	1	3	4	4	5	7	2	7	8	5	12	7	9	15	9	17	8
Panel to Investigate Fraud Charges in Afghan VoteThe move to head off the attack on the vote's legitimacy came as workers began the long process of collecting ballots.	1	panel investigate fraud charges afghan votethe move head attack vote legitimacy workers process collecting ballots	1	0	1	4	1	0	6	6	0	4	0	11	0	14	13	8	0	14	7
'Sherlock' Is Bicycling Across AustraliaPERTH, Australia - A former British soccer player raising money for a leukemia charity set off Wednesday on a coast-to-coast ride across Australia on a Victorian-era bicycle that is older than the country. Leukemia survivor Lloyd Scott dressed up as fictional British supersleuth Sherlock Holmes, complete with tweed coat, deerstalker hat and a fake mustache …	1	bicycling australiaperth australia british soccer player raising money leukemia charity set wednesday ride australia bicycle country leukemia survivor lloyd scott dressed fictional british supersleuth sherlock holmes complete tweed coat deerstalker hat fake mustache trip perth sydney	0	2	2	0	2	1	2	1	3	2	4	1	10	12	2	2	16	4	15
French seek 'anti-Semitic' TV banThe French prime minister calls for a satellite TV channel backed by Hezbollah to be taken off air.	1	french seek tv banthe french prime minister calls satellite tv channel hezbollah air	1	0	1	4	1	0	6	6	0	4	0	11	5	0	0	3	4	10	4
Iraqi Kidnappers of French Reporters Demand Ransom (Update1)The Iraqi kidnappers of two French reporters who have been missing since Aug. 20 today demanded a \$5 million ransom as a condition for their release, according to a statement posted on an Islamic Web site.	1	iraqi kidnappers french reporters demand ransom update1 iraqi kidnappers french reporters missing demanded ransom condition release statement posted islamic web site	1	0	1	3	4	4	5	7	2	7	8	5	12	7	9	15	6	15	8
Bush Backers in Wisconsin Say He Is Decisive in War (Reuters)Reuters - The Iraq war and concerns about\terrorism may determine the outcome of the upcoming election,\and they appear to have bolstered support for President Bush in\at least one Republican bastion in the swing state of\Wisconsin.	1	bush backers wisconsin decisive war reuters reuters iraq war concerns determine outcome upcoming election bolstered support president bush republican bastion swing	1	0	1	4	1	0	6	6	0	4	0	11	0	14	13	8	0	14	7
Iran Sees No Reason for Iraq Summit (AP)AP - There is no reason to hold a meeting of Iraq's neighbors planned for this week in Amman, an Iranian envoy said Monday in a further sign of strained relations following accusations by Jordan's King Abdullah that Tehran wanted to influence the Iraqi elections.	1	iran reason iraq summit ap ap reason hold meeting iraq neighbors planned week amman iranian envoy monday sign strained relations accusations jordan king abdullah tehran influence iraqi elections	1	0	1	4	1	0	6	6	0	4	0	11	5	0	0	9	13	7	4
Peruvian Maoist trial thrown into chaosThe first hearing in the re-trial of former leaders of Peru #39;s Shining Path guerrilla group has ended in chaos. The judge suspended the hearing after the group #39;s founder, Abimael Guzman, and his 15 co-defendants	1	peruvian maoist trial thrown chaosthe hearing leaders peru shining path guerrilla chaos judge suspended hearing founder abimael guzman	1	0	1	4	1	5	3	2	1	0	8	8	7	8	11	13	6	15	10
Iraq Attacks Leave at Least 20 DeadIraqi insurgents staged nearly simultaneous attacks Friday morning on police stations at opposite ends of Baghdad, killing at least 20 people, freeing dozens of prisoners and emptying a police arsenal in a demonstration of the militants' strength in the heart of the country.	1	iraq attacks leave deadiraqi insurgents staged simultaneous attacks friday morning police stations opposite baghdad killing people freeing dozens prisoners emptying police arsenal demonstration militants strength heart country	1	0	1	3	4	4	5	7	2	7	6	4	4	7	7	5	9	3	3
PM edges ahead in latest pollJOHN Howard #39;s plea for voters to trust him with the economy is paying early dividends, an exclusive Herald Sun poll shows. The Coalition has moved ahead of Labor by 52 per cent to 48 per cent as the Prime Minister #39;s interest rates campaign takes hold.	1	pm edges ahead polljohn howard plea voters trust economy paying dividends exclusive herald sun poll coalition moved ahead labor cent cent prime minister rates campaign takes hold	1	0	3	4	1	0	6	6	0	4	0	11	0	14	13	8	0	14	7
Dutch security reviewed on threatTHE HAGUE, Netherlands - The government vowed tough measures yesterday against what a leading politician called quot;the arrival of jihad in the Netherlands quot; after a death threat to a Dutch lawmaker was found pinned with a knife to the body of a slain	1	dutch security reviewed threatthe hague netherlands government vowed tough measures yesterday leading politician called quot arrival jihad netherlands quot death threat dutch lawmaker pinned knife body slain	1	0	1	3	4	4	5	7	2	7	8	5	12	8	0	13	6	15	10
MPs back Putin plan for regionsThe Russian Duma backs President Putin's plan to replace elected regional bosses with his own appointees.	1	mps putin plan regionsthe russian duma president putin plan replace elected regional bosses appointees	1	0	1	4	1	0	6	6	0	4	0	11	0	14	13	8	0	14	7
Returning Fallujans will face clampdownFALLUJAH, Iraq -- The US military is drawing up plans to keep insurgents from regaining control of this battle-scarred city, but returning residents may find that the measures make Fallujah look more like a police state than the democracy they have been promised.	1	returning fallujans clampdownfallujah iraq military drawing plans insurgents regaining control city returning residents measures fallujah police democracy promised	1	0	1	3	4	4	5	7	2	7	6	4	12	7	10	15	9	17	8
22 Spend Own Fortunes, One Wins House Seat (AP)AP - Of the 22 candidates who each spent more than #36;1 million of their own money trying to win their first election to Congress, only one made it.	1	spend fortunes wins house seat ap ap candidates spent money win election congress	0	2	2	4	1	0	6	6	0	4	0	11	0	14	13	8	0	14	7
Iraq Group Sets Ransom, Deadline for French Release (Reuters)Reuters - A statement posted on a Web site\purportedly by an Iraqi group which said it was holding two\French hostages set a #36;5 million ransom on Monday and issued a\48-hour deadline for its demands to be met.	1	iraq sets ransom deadline french release reuters reuters statement posted web iraqi holding hostages set ransom monday issued deadline demands met	1	0	1	3	4	4	5	7	2	7	8	5	12	7	9	15	6	15	8
More dead in fresh Iraq violenceAt least nine Iraqis and four US soldiers are reported to have been killed in renewed violence in Iraq.	1	dead fresh iraq violenceat iraqis soldiers reported killed renewed violence iraq	1	0	1	3	4	4	5	7	2	7	6	4	4	7	7	15	9	3	3
Blast kills seven US Marines in IraqA massive car bomb exploded on the outskirts of the Iraqi city of Fallujah, killing seven United States Marines and wounding several others, a US military official said.	1	blast kills marines iraqa massive car bomb exploded outskirts iraqi city fallujah killing united marines wounding military official	1	0	1	3	4	4	5	7	2	7	6	4	4	7	7	5	9	3	3
Peru Rebel Chief Scores Publicity Coup in Court CALLAO NAVAL BASE, Peru (Reuters) - Punching the air with a fist and chanting rebel slogans, Peru's Shining Path founder Abimael Guzman scored a propaganda coup on Friday and forced his terrorism retrial to be postponed for a week.	1	peru rebel chief scores publicity coup court callao naval base peru reuters punching air fist chanting rebel slogans peru shining path founder abimael guzman scored propaganda coup friday forced terrorism retrial postponed week	1	0	1	3	4	4	5	7	2	7	8	5	12	8	10	13	6	15	10
Nev. Move to Purge Some Dem Voters Fails (AP)AP - Elections officials have rebuffed an attempt by a former GOP operative to purge about 17,000 Democrats from the voter rolls in the battleground state of Nevada, where the two presidential candidates are in a dead heat.	1	move purge dem voters fails ap ap elections officials rebuffed attempt gop operative purge democrats voter rolls battleground nevada presidential candidates dead heat	1	0	1	4	1	0	6	6	0	4	0	11	0	14	13	8	0	14	7
Ethiopia Agrees to Demarcate Most of Border ADDIS ABABA (Reuters) - Ethiopian Prime Minister Meles Zenawi said on Friday demarcation of most of the country's 600 mile border with Eritrea could begin immediately, raising hopes a long-simmering border dispute could be resolved.	1	ethiopia agrees demarcate border addis ababa reuters ethiopian prime minister meles zenawi friday demarcation country mile border eritrea raising hopes border dispute resolved	1	0	1	3	4	0	6	6	0	4	0	11	4	7	7	3	4	10	3
Former musician and Hells member sentenced to 15 months for threatening judge (Canadian Press)Canadian Press - TROIS-RIVIERES, Que. (CP) - A former Hells Angels member who played trumpet with the Quebec City Orchestra was sentenced Friday to 15 months in jail for uttering death threats against a judge.	1	musician hells sentenced months threatening judge canadian press canadian press cp hells angels played trumpet quebec city orchestra sentenced friday months jail uttering death threats judge	1	0	1	3	4	4	3	2	1	0	8	8	7	8	11	13	6	15	10
4 US soldiers killed in roadside bomb attack; coalition steps up &lt;b&gt;...&lt;/b&gt;Roadside bombings killed four American soldiers in Baghdad, the US command said Wednesday, as US and Iraqi troops stepped up pressure on Sunni insurgents before this week #39;s start of the Islamic holy month of Ramadan.	1	soldiers killed roadside bomb attack coalition steps lt gt lt gt roadside bombings killed american soldiers baghdad command wednesday iraqi troops stepped pressure sunni insurgents week start islamic holy month ramadan	1	0	1	3	4	4	5	7	2	7	6	4	12	7	10	15	9	17	3
EU force takes over in BosniaA European Union force yesterday took over peacekeeping in Bosnia from Nato for an operation seen as a test of the EU #39;s military aspirations and credibility.	1	eu force takes bosniaa european union force yesterday peacekeeping bosnia nato operation test eu military aspirations credibility	1	0	1	4	1	0	6	6	0	4	0	11	5	0	0	9	13	7	4
ETA Seals Off Madrid with 5 Bombs, 2 Police Hurt (Reuters)Reuters - The Basque separatist group ETA set off\five bombs at petrol stations around Madrid on Friday, putting\a stranglehold on the city at the start of a long holiday\weekend.	1	eta seals madrid bombs police hurt reuters reuters basque separatist eta set bombs petrol stations madrid friday stranglehold city start	1	0	1	3	4	4	5	7	2	7	6	4	4	7	7	5	9	3	3
Activist's Daughter Speaks Against Castro (AP)AP - Her political activist father is her hero and Sayli Navarro wants to follow in his footsteps #151; at any cost. The soft-spoken, articulate teenager was just 6 when her father went to prison the first time, for posting signs reading "Down with Fidel."	1	activist daughter speaks castro ap ap political activist father hero sayli navarro follow footsteps cost articulate teenager father prison time posting signs reading fidel	1	2	2	4	1	0	3	2	0	4	8	11	0	14	13	13	6	15	10
Millionaire Candidates List (AP)AP - Candidates who spent more than #36;1 million of their own money trying to win election to Congress in 2004 struck out in nearly every case. Eight made it to the Nov. 2 election, but only one was victorious. The spenders, how much they spent and how they fared:	1	millionaire candidates list ap ap candidates spent money win election congress struck election victorious spenders spent fared	1	0	1	4	1	0	6	6	0	4	0	11	0	14	13	8	0	14	7
Russia Mourns Hostage Deaths, Putin Criticized BESLAN, Russia (Reuters) - Russia on Monday mourned the deaths of hundreds of children and adults in its worst hostage drama as criticism mounted over the way President Vladimir Putin and his security forces handled the crisis.	1	russia mourns hostage deaths putin criticized beslan russia reuters russia monday mourned deaths hundreds children adults worst hostage drama criticism mounted president vladimir putin security forces handled crisis	1	0	1	3	4	4	5	7	2	7	8	5	12	0	9	9	13	7	8
Public warning over letter bombsThe discovery of 10 letter bombs has prompted a police warning to the public to exercise caution. Bedfordshire Police said none of the improvised devices - containing lighter fluid - had ignited, despite the fact that some had been opened.	1	public warning letter bombsthe discovery letter bombs prompted police warning public exercise caution bedfordshire police improvised devices lighter fluid ignited	1	0	1	3	4	4	5	7	2	7	6	4	4	2	7	5	9	3	3
India and Pakistan wind up talks, deadlock on Kashmir (AFP)AFP - The foreign ministers of India and Pakistan held a closing round of talks amid reports of progress on peripheral issues, but the nuclear rivals remained deadlocked on Kashmir.	1	india pakistan wind talks deadlock kashmir afp afp foreign ministers india pakistan held closing round talks amid reports progress peripheral issues nuclear rivals remained deadlocked kashmir	1	0	1	4	1	0	6	6	0	4	0	11	5	0	0	9	13	7	4
Anwar launches bid to clear nameLawyers for Anwar Ibrahim, the former deputy prime minister of Malaysia, have launched a bid to clear his name. Mr Anwar was freed from jail on Thursday, after a conviction for sodomy was quashed by a Malaysian court.	1	anwar launches bid namelawyers anwar ibrahim deputy prime minister malaysia launched bid anwar freed jail thursday conviction sodomy quashed malaysian court	1	0	1	4	1	0	6	6	0	4	8	5	12	8	9	13	6	15	10
Iraq's Allawi Issues Ultimatum to Falluja BAGHDAD (Reuters) - Iraq's interim prime minister warned the rebel-held city of Falluja on Wednesday it must hand over foreign militants, including America's top enemy in Iraq, or face a major operation to root them out.	1	iraq allawi issues ultimatum falluja baghdad reuters iraq interim prime minister warned city falluja wednesday hand foreign militants including america top enemy iraq major operation root	1	0	1	3	4	4	5	7	2	7	6	5	12	7	10	15	9	17	8
West Japan on Guard for Aftershocks After Quakes TOKYO (Reuters) - Residents of western Japan were warned of possible aftershocks on Monday after two strong earthquakes the previous day but authorities said the tremors were not directly linked to a cycle of major seismic activity that hits the region every century or so.	1	west japan guard aftershocks quakes tokyo reuters residents western japan warned aftershocks monday strong earthquakes previous day authorities tremors directly linked cycle major seismic activity hits region century	1	0	1	3	4	4	4	8	9	10	11	4	4	0	6	5	17	7	12
US Marines Die In Fallujah Car BombingBAGHDAD, Iraq -- A US military official in Iraq said seven American marines have been killed Monday in a car-bomb explosion. Several other Marines have been wounded in the attack.	1	marines die fallujah car bombingbaghdad iraq military official iraq american marines killed monday explosion marines wounded attack	1	0	1	3	4	4	5	7	2	7	6	4	4	7	7	5	9	3	3
Ban for former Ahold executivesDutch retailer Ahold's former chairman and its ex-finance officer are barred from executive posts as part of a US fraud case settlement.	1	ban ahold executivesdutch retailer ahold chairman officer barred executive posts fraud settlement	0	1	3	4	1	5	0	0	1	0	10	7	3	10	15	0	8	16	19
Clinton Has Successful Quadruple BypassNEW YORK - Bill Clinton underwent a successful quadruple heart bypass operation Monday to relieve severely clogged arteries that doctors said put the former president at grave risk of suffering a heart attack. Clinton is expected to make a full recovery, but doctors said he was fortunate to have checked himself into the hospital when he did...	1	clinton successful quadruple bypassnew york bill clinton underwent successful quadruple heart bypass operation monday relieve severely clogged arteries doctors president grave risk suffering heart attack clinton expected recovery doctors fortunate checked hospital	1	0	1	3	5	4	3	2	2	7	6	4	4	2	7	10	10	13	16
No Kashmir BreakthroughNEW DELHI, 7 September 2004 - India and Pakistan stuck to their guns on the Kashmir issue as the foreign ministers of the two countries concluded their talks yesterday on what was described as a positive note.	1	kashmir breakthroughnew delhi september india pakistan stuck guns kashmir issue foreign ministers countries concluded talks yesterday positive note	1	0	1	4	1	0	6	6	0	4	0	11	5	0	0	9	13	7	4
Explosion in Jerusalem Caused by Accident -Police (Reuters)Reuters - A blast heard in central Jerusalem on\Thursday was caused by the apparently accidental explosion of a\gas canister inside a shop, police said.	1	explosion jerusalem caused accident reuters reuters blast heard central jerusalem caused accidental explosion canister inside shop police	1	0	1	3	4	4	5	7	2	7	6	4	4	7	7	5	9	3	3
Hurricane Ivan again growing in strength, Caribbean islands &lt;b&gt;...&lt;/b&gt;Islanders scrambled to put up storm shutters and buy water as hurricane Ivan churned toward Barbados just days after hurricane Frances tore across the Caribbean and through Florida.	1	hurricane ivan growing strength caribbean islands lt gt lt gt islanders scrambled storm shutters buy water hurricane ivan churned barbados days hurricane frances tore caribbean florida	1	0	3	3	5	4	5	7	8	8	6	4	4	11	12	5	9	12	11
FCC Proposes \$1.2M Indecency Fine for FoxWASHINGTON - Federal regulators proposed a record indecency fine of nearly \$1.2 million Tuesday against Fox Broadcasting Co. for an episode of its reality series "Married by America" that included graphic scenes from bachelor and bachelorette parties...	1	fcc proposes indecency fine foxwashington federal regulators proposed record indecency fine tuesday fox broadcasting episode reality series married america included graphic scenes bachelor bachelorette parties	0	1	0	4	1	5	0	0	1	0	10	8	3	10	15	6	8	16	13
Kremlin rules out public inquiry on BeslanLONDON President Vladimir Putin of Russia has ruled out a public inquiry into the Beslan school siege and snarled at those who think he should do business with Chechen militants, two British newspapers said Tuesday.	1	kremlin rules public inquiry beslanlondon president vladimir putin russia ruled public inquiry beslan school siege snarled business chechen militants british newspapers tuesday	1	0	1	4	1	4	5	7	2	7	8	5	12	7	9	13	6	15	10
U.S. Seeking NATO Help in AfghanistanWashington will ask NATO\to devise a blueprint by February to have the alliance take\over operations in Afghanistan, now split between an American\force and NATO contingent, officials said on Tuesday.	1	seeking nato afghanistanwashington devise blueprint february alliance operations afghanistan split nato contingent officials tuesday	1	0	1	4	1	0	0	0	0	4	0	7	3	0	15	9	13	11	18
Soldier charged with murderA British soldier has been charged with the murder of a civilian in Iraq, police said. Trooper Kevin Lee Williams, 21, from the 2nd Royal Tank Regiment, is due to appear at Bow Street Magistrates Court.	1	soldier charged murdera british soldier charged murder civilian iraq police trooper kevin lee williams 2nd royal tank regiment bow street magistrates court	1	0	1	3	4	4	5	7	2	7	8	5	12	8	11	13	6	15	10
Ljubicic Downs Hanescu at Open De MoselleTop-seeded Ivan Ljubicic of Croatia beat Victor Hanescu of Romania 6-4, 6-4 Tuesday in the first round of the Open de Moselle.	1	ljubicic hanescu de ivan ljubicic croatia beat victor hanescu romania tuesday round de moselle	0	2	2	0	2	1	2	1	4	1	2	10	2	9	12	12	1	1	11
14 Palestinian Militants Killed in GazaGAZA CITY, Gaza Strip Sept. 7, 2004 - Israeli helicopters attacked a Hamas training camp early Tuesday, killing at least 14 militants and wounding 30 others in one of the deadliest airstrikes since fighting broke out four years ago.	1	palestinian militants killed gazagaza city gaza strip israeli helicopters attacked hamas training camp tuesday killing militants wounding deadliest airstrikes fighting broke ago	1	0	1	3	4	4	5	7	2	7	6	4	4	7	7	3	4	10	3
Fierce Clashes in Iraq Kill 34 PeopleBAGHDAD, Iraq - U.S. forces battled insurgents loyal to Shiite cleric Muqtada al-Sadr in the Baghdad slum of Sadr City on Tuesday, in clashes that left at least 34 people dead, including one American soldier, and 193 people injured, U.S...	1	fierce clashes iraq kill peoplebaghdad iraq forces battled insurgents loyal shiite cleric muqtada baghdad slum sadr city tuesday clashes left people dead including american soldier people injured	1	0	1	3	4	4	5	7	2	7	6	5	12	7	10	15	9	17	8
Clashes in Baghdad Slum Kill 22 Iraqis, U.S. Soldier BAGHDAD (Reuters) - Iraqi fighters battled U.S. troops in a Baghdad slum district Tuesday, raising the death toll to 22 Iraqis and one U.S. soldier and threatening to wreck a cease-fire called by rebel Shi'ite cleric Moqtada al-Sadr.	1	clashes baghdad slum kill iraqis soldier baghdad reuters iraqi fighters battled troops baghdad slum district tuesday raising death toll iraqis soldier threatening wreck called rebel cleric moqtada	1	0	1	3	4	4	5	7	2	7	6	5	12	7	10	15	9	17	8
A perfect storm of political peril, unless...The extended train wreck that has been American-dominated Iraq is winding its way toward a decisive intersection: the national elections scheduled for Jan. 30, 2005, where voters will be asked	1	perfect storm political peril extended train wreck iraq winding decisive intersection national elections scheduled voters	1	0	1	4	1	0	6	6	0	4	0	11	0	14	13	8	0	14	7
Ukraine awaits election-deal detailsThe Supreme Court is expected to rule Friday on rerunning the country's disputed presidential election.	1	ukraine awaits detailsthe supreme court expected rule friday rerunning country disputed presidential election	1	0	1	4	1	0	6	6	0	4	0	11	0	14	13	8	0	14	7
Eureka! Has Australia found its 'defining moment'?Friday is the 150th anniversary of Eureka Day. For some Australians, it's their Boston Tea Party.	1	eureka australia moment friday 150th anniversary eureka day australians boston tea party	1	2	2	0	2	2	1	5	5	3	3	3	9	4	8	11	3	9	9
Thousands to attend Moscow anti-terror rallyOver 100,000 people are expected to attend an anti-terrorism rally in Moscow following the Beslan school massacre. The rally, being held outside the Kremlin, is taking place on the second day of official morning	1	thousands attend moscow rallyover people expected attend rally moscow beslan school massacre rally held kremlin day official morning	1	0	1	3	4	4	5	7	2	7	6	4	4	7	7	5	9	3	3
Iraq PM pleads for Europe #39;s helpIraq #39;s US-backed leader has made an impassioned plea for European nations divided by the war to reunite to help stabilize and rebuild his country.	1	iraq pm pleads europe helpiraq leader impassioned plea european nations divided war reunite stabilize rebuild country	1	0	1	4	1	0	6	6	0	4	0	11	5	0	0	9	13	7	4
Supreme Court to Review Inmate Freedom Law (AP)AP - The Supreme Court agreed Tuesday to consider the constitutionality of a federal law that requires state prisons to accommodate inmate religions, from Christianity to Satanism.	1	supreme court review inmate freedom law ap ap supreme court agreed tuesday constitutionality federal law requires prisons accommodate inmate religions christianity satanism	1	0	1	4	1	5	3	2	1	0	10	8	7	8	11	13	12	13	10
7 U.S. Groups Ask U.N. for Vote Observers (AP)AP - Seven American activist groups asked the United Nations on Monday to provide international observers for next month's presidential election.	1	vote observers ap ap american activist united nations monday provide international observers month presidential election	1	0	1	4	1	0	6	6	0	4	0	11	0	14	13	8	0	14	7
US troops accelerate operations against Sunni insurgents_ US troops are on the offensive in Iraq ahead of the holy month of Ramadan, which is expected to start at the end of the week. The operations appear aimed at preventing a repeat of the	1	troops accelerate operations sunni troops offensive iraq ahead holy month ramadan expected start week operations aimed preventing repeat	1	0	1	3	4	4	5	7	2	7	6	5	12	7	10	15	9	17	8
Baffled in Loss, Democrats Seek Road ForwardDemocrats said President Bush's defeat of Senator John Kerry by three million votes left the party facing its most difficult time in at least 20 years.	1	baffled loss democrats seek road forwarddemocrats president bush defeat senator john kerry votes left party facing difficult time	1	0	1	4	1	0	6	6	0	4	0	11	0	14	13	8	0	14	7
Musharraf visits AfghanistanPakistani President General Pervez Musharraf on his visit after the landmark presidential polls in Afghanistan congratulated his Afghan counterpart Hamid Karzai for his victory Saturday afternoon.	1	musharraf visits afghanistanpakistani president pervez musharraf visit landmark presidential polls afghanistan congratulated afghan counterpart hamid karzai victory saturday afternoon	1	0	1	4	1	0	6	6	0	4	0	11	0	14	13	8	0	14	7
Bush: Americans Expect Bipartisanship (AP)AP - President Bush is striking twin themes for a second term, vowing to fight hard for his political agenda while reaching across the aisle to Democrats.	1	bush americans expect bipartisanship ap ap president bush striking twin themes term vowing fight hard political agenda reaching aisle democrats	1	0	1	4	1	0	6	6	0	4	0	11	0	14	13	8	0	14	7
UN offers plan to calm tension along Rwanda-Congo borderKINSHASA - The United Nations says it may have found a way to prevent the further escalation of tensions between Congo and Rwanda.	1	offers plan calm tension borderkinshasa united nations prevent escalation tensions congo rwanda	1	0	1	4	4	0	6	6	0	4	0	11	5	0	0	9	13	7	4
Russia Says Attack Was To Ignite Regional WarThe guerrillas who took over a school in southern Russia argued heatedly over whether to abandon the siege in the moments leading up to the firestorm of explosions and shooting that killed hundreds, Russian officials said Monday.	1	russia attack ignite regional warthe guerrillas school southern russia argued heatedly abandon siege moments leading firestorm explosions shooting killed hundreds russian officials monday	1	0	1	3	4	4	5	7	2	7	6	4	4	7	7	5	9	3	3
Philippines not relieved from nature #39;s curseWith the death toll mounting to 1,000 after a deadly storm Typhoon Nanmadol that hit the nation three days before, the nature #39;s curse is still haunting Philippines when an earthquake with a preliminary magnitude of 4.2 rocked the northern Philippines on	1	philippines relieved nature cursewith death toll mounting deadly storm typhoon nanmadol hit nation days nature curse haunting philippines earthquake preliminary magnitude rocked northern philippines	1	0	1	3	4	4	5	7	2	7	6	4	4	11	7	5	9	3	3
Iraqi forces raid Ramadi mosquesUS forces stepped up operations yesterday across a wide swath of the Sunni insurgent strongholds northwest of the capital, pounding targets in three urban centers from the air and supporting Iraqi troops in raids on mosques suspected of harboring	1	iraqi forces raid ramadi mosquesus forces stepped operations yesterday wide swath sunni insurgent strongholds northwest capital pounding targets urban centers air supporting iraqi troops raids mosques suspected harboring	1	0	1	3	4	4	5	7	2	7	6	5	12	7	10	15	9	17	8
US bombardment kills 5 in FallujahFALLUJAH - US artillery shelled Fallujah yesterday after overnight air and tank attacks killed five people in Iraqs most rebellious city, braced for an all-out offensive now the US presidential election is over.	1	bombardment kills fallujahfallujah artillery shelled fallujah yesterday overnight air tank attacks killed people iraqs rebellious city braced offensive presidential election	1	0	1	3	4	4	5	7	2	7	6	4	4	7	7	5	9	3	3
Caribbean Braces for Another Hurricane (AP)AP - Islanders scrambled to put up storm shutters and stock up on supplies as the fourth major hurricane of the season churned closer to the Caribbean, packing sustained winds of 105 mph.	1	caribbean braces hurricane ap ap islanders scrambled storm shutters stock supplies fourth major hurricane season churned closer caribbean packing sustained winds mph	0	2	3	2	5	6	4	4	8	8	6	4	4	11	12	5	17	12	11
Iraq nuclear losses #39;a scandal #39;Former UN chief weapons inspector Hans Blix has said the loss of control of Iraq #39;s nuclear sites by the US after it occupied the country was scandalous.	1	iraq nuclear losses scandal chief weapons inspector hans blix loss control iraq nuclear sites occupied country scandalous	1	0	1	4	1	0	6	6	0	4	0	5	5	0	0	9	13	7	4
Supreme Court Ruling Expected in Ukraine Crisis (Reuters)Reuters - Ukraine's Supreme Court is expected to\rule on Friday on whether to overturn the result of a disputed\presidential election that has plunged the country into turmoil\and generated distrust between Russia and the West.	1	supreme court ruling expected ukraine crisis reuters reuters ukraine supreme court expected friday overturn result election plunged country generated distrust russia west	1	0	1	4	1	0	6	6	0	4	0	11	0	14	13	8	0	14	7
The radical Islamic cleric was deported from Germany late Tuesday &lt;b&gt;...&lt;/b&gt;Turkish officials were doing what was necessary in regard to the return of Metin Kaplan, who was deported by Germany on Tuesday after a Cologne court ruled he could be extradited, Erdogan told reporters.	1	radical islamic cleric deported germany late tuesday lt gt lt gt turkish officials regard return metin kaplan deported germany tuesday cologne court ruled extradited erdogan told reporters	1	0	1	3	4	4	5	7	2	7	8	5	12	7	10	15	6	17	8
Blame pinned on British home secretary for 'exposing' affair (AFP)AFP - The blame falls on Home Secretary David Blunkett for exposing his three-year affair with the married publisher of The Spectator, the magazine itself charges in its latest issue.	1	blame pinned british secretary affair afp afp blame falls secretary david blunkett exposing affair married publisher spectator magazine charges issue	1	0	1	4	1	0	3	2	0	4	8	8	7	8	0	13	6	15	10
French minister returns empty handedLeaving behind two French reporters still held hostage in Iraq, France #39;s foreign minister headed home from the Middle East but said they were still believed to be alive and that efforts to free them would continue.	1	french minister returns empty handedleaving french reporters held hostage iraq france foreign minister headed middle east believed alive efforts free continue	1	0	1	3	4	0	6	6	0	4	0	5	12	0	9	15	6	7	8
Israel Arrests Bombing Suspect, Kills 4 Militants (Reuters)Reuters - Israel dealt a double blow to the\Palestinian Islamic group Hamas on Wednesday, arresting a West\Bank leader held responsible for a twin suicide bus bombing\that killed 16 and killing two militants in Gaza air strikes.	1	israel arrests bombing suspect kills militants reuters reuters israel dealt double blow islamic hamas wednesday arresting leader held responsible twin suicide bus killed killing militants gaza air strikes	1	0	1	3	4	4	5	7	2	7	6	4	4	7	7	3	9	3	3
Tokyo Stocks Higher at Late Morning (AP)AP - Tokyo stocks rose moderately Monday morning on bargain hunting following Friday's losses. The U.S. dollar was up against the Japanese yen.	1	tokyo stocks late morning ap ap tokyo stocks rose moderately monday morning bargain hunting friday losses dollar japanese yen	0	1	3	2	0	6	4	8	9	10	11	12	11	3	6	16	17	18	12
Canadian freedoms 'under threat'Personal freedoms in Canada are being eroded by the "war on terror", the country's privacy commissioner warns.	1	canadian freedoms freedoms canada eroded war terror country privacy commissioner warns	1	0	1	4	1	0	6	6	0	4	8	11	5	0	0	13	6	15	10
Letter threat to Dutch politicianA letter left on the body of murdered film-maker Theo van Gogh reportedly threatens the life of a liberal politician.	1	letter threat dutch politiciana letter left body murdered theo van gogh reportedly threatens life liberal politician	1	0	1	3	4	4	5	7	2	7	8	5	12	7	9	15	6	15	8
Oil exports flow as strike woes easeA general strike in Nigeria, which has raised fears over oil supply from the world #39;s seventh-largest exporter, will likely end its first phase on Thursday quot;all going well quot;, union leaders said.	1	oil exports flow strike woes easea strike nigeria raised fears oil supply exporter phase thursday quot quot union leaders	1	1	3	2	0	6	4	8	9	10	11	12	11	3	6	16	17	18	12
ASEAN moves closer to single market with #39;road map #39;, global trade &lt;b&gt;...&lt;/b&gt;JAKARTA : ASEAN finance ministers ended a meeting which saw Southeast Asia edge closer to a Europe-style single market, laying out a quot;road map quot; for integration and opening doors to wider global trade.	1	asean moves closer single market road map global trade lt gt lt gt jakarta asean finance ministers meeting southeast asia edge closer single market laying quot road map quot integration doors wider global trade	0	1	3	4	1	0	6	6	0	4	0	11	5	0	0	9	13	7	4
N.Korea Says Met U.S. Officials, No Nuclear Progress (Reuters)Reuters - North Korean and U.S. officials met this\week in New York but made no progress on restarting six-party\talks on the North's nuclear programs, a North Korean Foreign\Ministry spokesman said on Saturday.	1	met officials nuclear progress reuters reuters north korean officials met york progress restarting north nuclear programs north korean spokesman saturday	1	0	1	4	1	0	6	6	0	4	0	11	5	0	0	9	13	7	4
N. Korea and U.S. Met Twice This Week (AP)AP - North Korea on Saturday said its U.N. diplomats met U.S. officials in New York twice in the past week but concluded that Pyongyang should hold off on nuclear negotiations until the U.S. administration changes its "hostile" policy toward the country.	1	korea met week ap ap north korea saturday diplomats met officials york week concluded pyongyang hold nuclear negotiations administration hostile policy country	1	0	1	4	1	0	6	6	0	4	0	11	5	0	0	9	13	7	4
US troops move toward FallujahInsurgents and American forces clashed briefly Thursday near the Iraqi city. A large US assault is expected.	1	troops move fallujahinsurgents american forces clashed thursday iraqi city assault expected	1	0	1	3	4	4	5	7	2	7	6	4	12	7	10	15	9	17	8
Scarred Beslan offers tsunami aidThe Russian town of Beslan - scene of a bloody school siege last year - pledges aid for tsunami victims.	1	scarred beslan offers tsunami aidthe russian town beslan scene bloody school siege pledges aid tsunami victims	1	0	1	3	4	4	5	7	2	7	6	4	4	7	7	5	9	3	3
Flight From Hong Kong Diverted in UKLONDON Oct. 14, 2004 - A Virgin Atlantic plane heading from Hong Kong to London was diverted to an airport north of London on Thursday after receiving a bomb threat, police said.	1	flight hong kong diverted uklondon virgin atlantic plane heading hong kong london diverted airport north london thursday receiving bomb threat police	1	0	1	3	5	4	5	7	8	8	1	0	8	6	4	4	15	3	17
Putin Signs Up Russia for Kyoto Pact MOSCOW (Reuters) - President Vladimir Putin gave his seal of approval for Russia's crucial backing of the Kyoto Protocol, clearing the way for the U.N. environment pact aimed at curbing global warming to come into force early next year.	1	putin signs russia kyoto pact moscow reuters president vladimir putin seal approval russia crucial kyoto protocol clearing environment pact aimed curbing global warming force	1	0	1	4	1	0	6	6	0	4	0	11	5	0	0	9	13	7	4
Hezbollah rejects abolition callThe leader of militant Lebanese group Hezbollah rejects a UN call for the organisation to be disbanded.	1	hezbollah rejects abolition callthe leader militant lebanese hezbollah rejects call organisation disbanded	1	0	1	4	1	0	6	6	0	4	0	11	5	0	0	3	4	10	4
Putin signs up Russia for Kyoto pactThe Kremlin said Putin signed a parliament bill late on Thursday confirming Russia #39;s ratification of the protocol. Both chambers of Russia #39;s parliament approved ratification of the pact last month after Putin pointed the way.	1	putin signs russia kyoto pactthe kremlin putin signed parliament bill late thursday confirming russia ratification protocol chambers russia parliament approved ratification pact month putin	1	0	1	4	1	0	6	6	0	4	0	11	5	0	0	9	13	7	4
Munro, Morris Face Off in NLCS Game 2ST. LOUIS - The Houston Astros put their hopes in a pitcher untested in the postseason when they give Pete Munro the ball to start Game 2 of the NL Championship series on Thursday, one night after dropping the opener to the St...	1	munro morris nlcs game 2st louis houston astros hopes pitcher untested postseason pete munro ball start game nl championship series thursday night dropping opener st	0	2	2	0	2	2	1	5	5	3	3	3	9	4	8	11	3	9	2
Bush cuts down the middle on broccoli question (AFP)AFP - Facing a issue that once tripped up his father, US President George W. Bush told adoring supporters that he likes broccoli. Part of it, anyway.	1	bush cuts middle broccoli question afp afp facing issue tripped father president george bush told adoring supporters likes broccoli	1	0	1	4	1	0	6	6	0	4	0	11	0	14	13	8	0	14	7
Confident Bush Outlines Ambitious Plan for 2nd TermPresident Bush said he would begin work immediately on his proposal to overhaul Social Security.	1	confident bush outlines ambitious plan 2nd termpresident bush proposal overhaul social security	1	0	1	4	1	0	6	6	0	4	0	11	0	14	13	8	0	14	7
Alert shuts Los Angeles airportParts of Los Angeles international airport are temporarily closed down amid reports of a security breach.	1	alert shuts los angeles airportparts los angeles international airport temporarily closed amid reports security breach	0	1	3	0	5	6	4	5	8	8	1	0	8	11	12	6	15	12	2
Two Palestinians kiled in a night raid against a warehouse in GazaIsraeli military helicopters yesterday evening bombarded by missiles a building in one of the refugee camps in the downtown of Gaza, while two Palestinians were killed and other three injured in the sector by the Israeli bullets.	1	palestinians kiled night raid warehouse gazaisraeli military helicopters yesterday evening bombarded missiles building refugee camps downtown gaza palestinians killed injured sector israeli bullets	1	0	1	3	4	4	5	7	2	7	6	4	4	7	7	3	4	10	3
Al-Aqsa mosque restriction liftedIsrael says it will not restrict access to the al-Aqsa mosque compound in Jerusalem during the Muslim holy month of Ramadan, that begins on Friday.	1	mosque restriction liftedisrael restrict access mosque compound jerusalem muslim holy month ramadan friday	1	0	1	3	4	4	5	7	2	7	6	5	12	7	10	15	9	17	8
New EU Executive Chief Announces Revamped TeamThe incoming head of the European Union #39;s executive body has announced changes to his group of commissioners and says he is ready to go to the European Parliament to seek its approval of his team.	1	eu executive chief announces revamped teamthe incoming head european union executive body announced commissioners ready european parliament seek approval team	0	1	1	4	1	0	6	6	0	4	0	11	5	0	0	9	8	7	4
Medicare Premiums to Rise Record 17 Pct.WASHINGTON - Medicare premiums for doctor visits are going up a record \$11.60 a month next year. The Bush administration says the increase reflects a strengthened Medicare, while Democrats complain that seniors are being unfairly socked...	1	medicare premiums rise record medicare premiums doctor visits record month bush administration increase reflects strengthened medicare democrats complain seniors unfairly socked	0	1	3	2	0	6	4	8	9	10	11	12	11	14	6	8	0	18	12
120m origami birds of peace fall on ThailandAbout 120 million origami birds were air-dropped over southern Thailand yesterday in an attempt to quell a Muslim insurgency that has led to the deaths of more than 500 people this year.	1	120m origami birds peace fall thailandabout origami birds southern thailand yesterday attempt quell muslim insurgency led deaths people	1	0	1	3	4	4	5	7	2	7	6	4	4	7	7	5	9	3	3
Villagers flee clashes, huddle in forests GOMA, Congo -- Thousands of civilians have fled their homes after clashes in the east of Democratic Republic of Congo, the United Nations said yesterday, although it was unclear who was behind the violence.	1	villagers flee clashes huddle forests goma congo thousands civilians fled homes clashes east democratic republic congo united nations yesterday unclear violence	1	0	1	3	4	4	5	7	2	7	6	4	4	11	10	5	9	17	11
Protesters greet Taiwan president during brief visitTensions between Taiwan and China landed on Seattle #39;s doorstep last night when Taiwan President Chen Shui-bian visited Seattle under tight security, greeted by demonstrators both for and against Taiwan independence.	1	protesters greet taiwan president visittensions taiwan china landed seattle doorstep night taiwan president chen visited seattle tight security greeted demonstrators taiwan independence	1	0	1	4	1	0	6	6	0	4	0	11	5	0	0	9	13	7	4
Attack on UN vehicle kills one in southern AfghanistanKANDAHAR, Afghanistan : An Afghan man died and five people were hurt in a bomb attack on a UN vehicle in Afghanistan, officials said, in the second deadly blast in a week as the country prepares for next month #39;s polls.	1	attack vehicle kills southern afghanistankandahar afghanistan afghan died people hurt bomb attack vehicle afghanistan officials deadly blast week country prepares month polls	1	0	1	3	4	4	5	7	2	7	6	4	4	7	7	5	9	3	3
President, PM Review Dialogue Process With IndiaISLAMABAD, Pakistan : Sep 04 (PID) - President General Pervez Musharraf and Prime Minister Shaukat Aziz attended a meeting on Friday to review the progress of the composite dialogue between India and Pakistan delineates a strategy to carry the process	1	president pm review dialogue process indiaislamabad pakistan sep pid president pervez musharraf prime minister shaukat aziz attended meeting friday review progress composite dialogue india pakistan delineates strategy carry process	1	0	1	4	1	0	6	6	0	4	0	11	5	0	0	9	13	7	4
UN chief urges European Union to commit more troopsThe United Nations secretary-general, Kofi Annan, has appealed to the European Union to play a bigger role in UN peacekeeping operations.	1	chief urges european union commit troopsthe united nations kofi annan appealed european union play bigger role peacekeeping operations	1	0	1	4	1	0	6	6	0	4	0	11	5	0	0	9	13	7	4
Israeli Troops Kill Two Palestinians (AP)AP - Israeli troops killed two Palestinians in two separate incidents Friday, and Israeli helicopters fired three missiles at a Gaza warehouse the army said was used for making weapons.	1	israeli troops kill palestinians ap ap israeli troops killed palestinians separate incidents friday israeli helicopters fired missiles gaza warehouse army weapons	1	0	1	3	4	4	5	7	2	7	6	4	4	7	7	3	4	10	3
Death threats on film-maker #39;s bodyA LETTER left on the body of a Dutch filmmmaker murdered in Amsterdam contained death threats against a Dutch politician, the justice minister said today.	1	death threats bodya letter left body dutch filmmmaker murdered amsterdam contained death threats dutch politician justice minister	1	0	1	3	4	4	5	7	2	7	8	5	12	7	9	3	6	15	10
Accord on restoring rail link reached: Khokhrapar-Monabao routeISLAMABAD, Dec 3: Pakistan and India have agreed to an early resumption of rail link between Khokhrapar and Monabao suspended since the 1965 war.	1	accord restoring rail link reached routeislamabad dec pakistan india agreed resumption rail link khokhrapar monabao suspended war	1	0	1	4	1	0	6	6	0	4	0	11	5	0	0	9	13	7	4
Ukraine's Yanukovich to Run Again in Repeat Vote KIEV (Reuters) - Ukrainian Prime Minister Viktor Yanukovich said on Saturday he would stand against opposition liberal Viktor Yushchenko again in a re-run of their contested presidential election and he defiantly vowed he would win.	1	ukraine yanukovich repeat vote kiev reuters ukrainian prime minister viktor yanukovich saturday stand opposition liberal viktor yushchenko contested presidential election defiantly vowed win	1	0	1	4	1	0	6	6	0	4	0	11	0	14	13	8	0	14	7
French captives #39; fate mulledBAGHDAD, Iraq - An Islamic militant group that claimed to have kidnapped two French journalists said it would soon decide their fate, according to a message posted on a Web site Friday, and an Iraqi negotiator called the chance for their release quot;excellent	1	french captives fate mulledbaghdad iraq islamic militant claimed kidnapped french journalists decide fate message posted web site friday iraqi negotiator called chance release quot excellent	1	0	1	3	4	4	5	7	2	7	8	5	12	7	9	15	6	15	8
Russian school death toll tops 340The death toll in the Russian schoolhouse siege soared to more than 340 yesterday, and the horrifying human cost is likely to keep climbing.	1	russian school death toll tops 340the death toll russian schoolhouse siege soared yesterday horrifying human cost climbing	1	0	1	3	5	4	5	7	8	8	6	4	4	7	7	5	9	3	3
Vote Counting Begins in Afghan ElectionsKABUL, Afghanistan - Vote counting in Afghanistan's presidential election got under way Thursday, five days after a landmark vote meant to cement a new era of stability after more than two decades of strife. The head of the Afghan-U.N...	1	vote counting afghan electionskabul afghanistan vote counting afghanistan presidential election thursday days landmark vote meant cement era stability decades strife head	1	0	1	4	1	0	6	6	0	4	0	11	0	14	13	8	0	14	7
Bollywood actress Nirupa Roy diesBollywood actress Nirupa Roy dies after a heart attack at her home in Mumbai (Bombay) aged 73.	1	bollywood actress nirupa roy diesbollywood actress nirupa roy dies heart attack mumbai bombay aged	1	0	1	3	4	4	3	2	2	7	6	4	4	2	11	10	10	13	16
Atomic Power Station Halted in Russia, No Radiation MOSCOW (Reuters) - One reactor at a Russian nuclear power station was closed down after a malfunction, but there was no leak of radiation at the site near the city of Saratov on the Volga river, Russian news agencies reported on Friday.	1	atomic power station halted russia radiation moscow reuters reactor russian nuclear power station closed malfunction leak radiation site city saratov volga river russian news agencies reported friday	1	0	1	3	5	0	5	7	8	8	1	0	5	6	0	9	13	7	4
Morocco mosque collapse kills 10A house collapses onto a mosque in north-eastern Morocco, killing 10 people and injuring five others.	1	morocco mosque collapse kills 10a house collapses mosque morocco killing people injuring	1	0	1	3	4	4	5	7	2	7	6	4	4	7	7	5	9	3	3
US got complaints about security guardsThe US State Department Wednesday noted quot;aggressive quot; behavior by some DynCorp contractors hired to protect Afghan President Hamid Karzai.	1	complaints security guardsthe department wednesday quot aggressive quot behavior dyncorp contractors hired protect afghan president hamid karzai	1	0	1	4	1	0	6	6	0	4	0	11	0	14	13	8	0	14	7
NATO to send staff to IraqNATO will send military trainers to Iraq before the end of the year in response to appeals by Iraqi leaders for speedy action, US ambassador to NATO Nicholas Burns said today.	1	nato send staff iraqnato send military trainers iraq response appeals iraqi leaders speedy action ambassador nato nicholas burns	1	0	1	3	4	4	6	6	2	7	8	5	12	0	9	15	13	17	8
Israel Kills Two Hamas Militants After Renewed ThreatIsraeli air strikes killed two Hamas militants in Gaza on Thursday just after the Islamic group renewed its threats to continue rocket attacks against Israelis despite a massive army offensive aimed at stopping them.	1	israel kills hamas militants renewed threatisraeli air strikes killed hamas militants gaza thursday islamic renewed threats continue rocket attacks israelis massive army offensive aimed stopping	1	0	1	3	4	4	5	7	2	7	6	4	4	7	7	3	4	10	3
Former Saddam Deputy Arrested in Iraq (AP)AP - Iraqi authorities claimed on Sunday to have captured Izzat Ibrahim al-Douri, the most wanted member of Saddam Hussein's ousted dictatorship, but there was confusion over the report, as the Iraqi defense minister said word of his arrest was "baseless."	1	saddam deputy arrested iraq ap ap iraqi authorities claimed sunday captured izzat ibrahim saddam hussein ousted dictatorship confusion report iraqi defense minister word arrest baseless	1	0	1	3	4	4	5	7	2	7	8	5	12	8	9	13	6	15	10
Blair heads to Hungary for summitTony Blair is to address leaders at conference of centre-left leaders in Hungarian capital Budapest.	1	blair heads hungary summittony blair address leaders conference leaders hungarian capital budapest	1	0	1	4	4	0	6	6	0	4	0	11	5	0	0	9	13	7	4
Saddam #39;s top aide al-Douri arrestedFile photo taken on March 1, 2003 shows Izzat Ibrahim at the Arab Summit in Sharm-el-Sheikh, Egypt. Ibrahim, the second most powerful man of the former Iraqi regime, was captured on Sept.	1	saddam top aide arrestedfile photo march izzat ibrahim arab summit egypt ibrahim powerful iraqi regime captured sept	1	0	1	3	4	4	5	7	2	7	8	5	12	7	10	15	6	15	8
U.N.: Traces of Plutonium Found in Egypt (AP)AP - U.N. experts have found traces of plutonium near an Egyptian nuclear facility and are investigating whether it could be weapons-related or simply a byproduct of the country's peaceful atomic activities, diplomats told The Associated Press on Friday.	1	traces plutonium egypt ap ap experts traces plutonium egyptian nuclear facility investigating simply byproduct country peaceful atomic activities diplomats told press friday	1	0	1	4	1	0	6	6	0	4	0	11	5	0	0	9	13	7	4
ERA Congratulates Nobel Peace Prize WinnerThe Environmental Rights Action/Friends of the Earth Nigeria (ERA/FoEN) has congratulated Kenya born Nobel Peace Prize winner, Dr.	1	era congratulates nobel peace prize winnerthe environmental rights earth nigeria congratulated kenya born nobel peace prize winner dr	1	0	1	4	5	0	6	6	0	4	0	11	5	0	0	9	13	7	4
Russian rocket carrying Russian-U.S. crew blasts off for space station (Canadian Press)Canadian Press - BAIKONUR, Kazakhstan (AP) - A Russian rocket carrying a new Russian-U.S. crew to the international space station lifted off from the Baikonur cosmodrome Thursday.	1	russian rocket carrying crew blasts space station canadian press canadian press baikonur kazakhstan ap russian rocket carrying crew international space station lifted baikonur cosmodrome thursday	1	0	1	3	5	4	5	7	8	8	1	0	8	6	4	4	15	0	17
Bangladesh seeks US intelligence cooperationBangladesh is willing to sign a protocol with the United States to set up a joint working group like India and Pakistan did to enhance Dhaka #39;s capability to effectively deal with future terrorist acts in the country.	1	bangladesh seeks intelligence cooperationbangladesh sign protocol united set joint india pakistan enhance dhaka capability effectively deal future terrorist acts country	1	0	1	4	1	0	6	6	0	4	0	11	5	0	0	9	13	7	4
S.Africa Cancels Thatcher Meeting with Eq. GuineaSouth Africa has canceled a meeting with prosecutors from Equatorial Guinea who had hoped to interview Mark Thatcher on his suspected links to a coup plot in the oil-rich country, officials said on Sunday.	1	cancels thatcher meeting eq guineasouth africa canceled meeting prosecutors equatorial guinea hoped interview mark thatcher suspected links coup plot country officials sunday	1	0	1	4	1	0	3	2	0	4	8	5	5	8	11	13	6	15	10
Ivory Coast's Army Bombs Rebel Towns (Reuters)Reuters - Government warplanes and helicopter\gunships pounded rebel-held towns in northern Ivory Coast for a\second day on Friday, fueling fears of a slide into all-out war\in the world's top cocoa grower.	1	ivory coast army bombs rebel towns reuters reuters government warplanes pounded towns northern ivory coast day friday fueling fears slide top cocoa grower	1	0	1	3	4	4	5	7	2	7	6	4	4	11	12	5	9	12	11
EU leaders agree on Commission reshuffleISN SECURITY WATCH (05/11/04) - The EU heads of state agreed on Thursday night to a new line-up of commissioners in a attempt to bring the EU out of its institutional crisis that set in after incoming Commission President, former Portuguese prime minister	1	eu leaders agree commission reshuffleisn security watch eu heads agreed thursday night commissioners attempt bring eu institutional crisis set incoming commission president portuguese prime minister	1	0	1	4	1	0	6	6	0	4	0	11	5	0	0	9	13	7	4
Frances Knocks Out Power, Floods FloridaFORT PIERCE, Fla. - Hurricane Frances' wind and water whacked swaths of southern Florida with fire-hose force Sunday, submerging entire roadways and tearing off rooftops even as the storm weakened and crawled inland with heavy rain in its wake...	1	frances knocks power floods floridafort pierce hurricane frances wind water whacked swaths southern florida force sunday submerging entire roadways tearing rooftops storm weakened crawled inland heavy rain wake	1	0	1	3	5	4	5	7	8	8	6	4	4	11	12	5	9	12	11
PM and Latham target SydneyPrime Minister John Howard and Opposition Leader Mark Latham will target key marginal seats around Sydney as the election campaign hits its second week.	1	pm latham target sydneyprime minister john howard opposition leader mark latham target key marginal seats sydney election campaign hits week	1	0	1	4	1	0	6	6	0	4	0	11	0	14	13	8	0	14	7
New planes fly to battle locustsThe United Nations is flying six more aircraft to combat swarms of crop-devouring locusts in west Africa.	1	planes fly battle locuststhe united nations flying aircraft combat swarms locusts west africa	1	0	1	4	1	0	6	6	0	4	0	11	5	0	0	9	13	7	4
Cali Cartel Boss Sent to U.S. on Drug Charges BOGOTA, Colombia (Reuters) - The former boss of the Cali drug cartel, who once controlled most of the world's cocaine trade, was sent to the United States on Friday to face trafficking and money laundering charges.	1	cali cartel boss drug charges bogota colombia reuters boss cali drug cartel controlled cocaine trade united friday trafficking money laundering charges	1	0	3	4	1	5	3	2	1	0	4	8	7	2	11	10	10	13	16
President Hu congratulates Sihamoni on becoming king of CambodiaChinese President Hu Jintao sent a message to Norodom Sihamoni on Thursday to congratulate him on his election as the king of Cambodia.	1	president hu congratulates sihamoni king cambodiachinese president hu jintao message norodom sihamoni thursday congratulate election king cambodia	1	0	1	4	1	0	6	6	0	4	0	11	0	14	13	8	0	14	7
Rescued Chinese hostage diesIn southeast Pakistan one of two Chinese hostages injured during a rescue operation died of his injuries, military sources said Thursday.	1	rescued chinese hostage diesin southeast pakistan chinese hostages injured rescue operation died injuries military sources thursday	1	0	1	3	4	4	5	7	2	7	6	5	12	7	9	5	9	3	3
Pope Prays for Beslan School Dead at Italy Mass LORETO, Italy (Reuters) - Pope John Paul prayed for the victims of the "inhumane violence" of Russia's Beslan school tragedy as he said Mass on Sunday before 200,000 people in central Italy.	1	pope prays beslan school dead italy mass loreto italy reuters pope john paul prayed victims inhumane violence russia beslan school tragedy mass sunday people central italy	1	0	1	3	4	4	5	7	2	7	6	4	4	7	7	5	9	3	3
Israel, Egypt in Prisoner Swap CAIRO (Reuters) - Israel released six Egyptian students from prison on Sunday as part of a deal which includes freedom for Israeli businessman and convicted spy Azzam Azzam, Egyptian security sources said.	1	israel egypt prisoner swap cairo reuters israel released egyptian students prison sunday deal includes freedom israeli businessman convicted spy azzam azzam egyptian security sources	1	0	1	3	4	4	5	7	2	7	8	4	4	7	7	3	4	10	3
HAYLEY MICK:Hayley Mick is a journalist currently based in Vancouver. She has broadcast experience with CBC Radio #39;s Quirks and Quarks and has reported for the Vancouver Sun, CBC Online, and the Canadian Press #39;s Ontario and Vancouver bureaus.	1	hayley mick hayley mick journalist based vancouver broadcast experience cbc radio quirks quarks reported vancouver sun cbc online canadian press ontario vancouver bureaus	0	1	0	1	3	3	7	3	6	6	8	5	13	5	9	13	6	15	10
Argentina Basketball Coach Magnano QuitsRuben Magnano, who coached Argentina to the Olympic basketball gold medal in Athens, resigned Thursday to accept a coaching job in Italy.	1	argentina basketball coach magnano quitsruben magnano coached argentina olympic basketball gold medal athens resigned thursday accept coaching job italy	0	2	2	0	2	1	2	1	4	1	2	10	2	9	3	12	2	2	5
France Hopeful for Hostages, Fatwa Demands Release (Reuters)Reuters - France remained hopeful on Sunday that\two French hostages in Iraq would be freed and a religious\fatwa issued in Iraq demanded their release.	1	france hopeful hostages fatwa demands release reuters reuters france remained hopeful sunday french hostages iraq freed issued iraq demanded release	1	0	1	3	4	4	5	7	2	7	8	5	12	7	9	15	6	15	8
Saddam, Aides to Go on Trial Within Weeks - DaoudIraq #39;s toppled leader Saddam Hussein and his top aides will go on trial within weeks, Iraqi Minister of State Kasim Daoud said on Sunday.	1	saddam aides trial weeks daoudiraq toppled leader saddam hussein top aides trial weeks iraqi minister kasim daoud sunday	1	0	1	3	4	4	3	2	2	7	8	5	12	8	11	13	6	15	10
Thais #39;bomb #39; south with paper birds on Muslim southAround 50 Thai Air Force planes quot;bombed quot; the largely Muslim south with paper birds on Sunday as a symbol of peace for the restive region where nearly 500 people have been killed since January.	1	thais bomb south paper birds muslim southaround thai air force planes quot bombed quot muslim south paper birds sunday symbol peace restive region people killed january	1	0	1	3	4	4	5	7	2	7	6	4	4	7	7	5	9	3	3
Iraq Govt. Seeks to Confirm if Saddam Aide Held BAGHDAD (Reuters) - Iraq's government was scrambling on Sunday to confirm whether the most wanted Saddam Hussein aide still on the run had been captured, as confident statements that he had been seized gave way to doubt and confusion.	1	iraq govt seeks confirm saddam aide held baghdad reuters iraq government scrambling sunday confirm saddam hussein aide captured confident statements seized doubt confusion	1	0	1	3	4	4	5	7	2	7	8	5	12	7	9	15	6	17	8
Bush takes a double-digit lead as Kerry campaign struggles to regroup (AFP)AFP - George W. Bush took a double-digit lead in what had been a neck-and-neck presidential election contest, prompting Democratic challenger John Kerry to refocus his campaign on bread-and-butter economic issues, where the Republican incumbent president is considered vulnerable.	1	bush takes lead kerry campaign struggles regroup afp afp george bush lead presidential election contest prompting democratic challenger john kerry refocus campaign economic issues republican incumbent president considered vulnerable	1	0	1	4	1	0	6	6	0	4	0	11	0	14	13	8	0	14	7
Israel suspends soldier after girl shot 15 timesGAZA CITY -- The Israeli army yesterday suspended a platoon commander on suspicion he emptied an ammunition clip into a 13-year-old Palestinian girl from close range after she had already collapsed under fire.	1	israel suspends soldier girl shot timesgaza city israeli army yesterday suspended platoon commander suspicion emptied ammunition clip palestinian girl close range collapsed fire	1	0	1	3	4	4	5	7	2	7	6	4	4	7	7	3	4	10	3
Japan Airlines Sees Profit on Int'l Travel (AP)AP - Japan Airlines Corp. said Friday that it returned to profitability in first half of the fiscal year as international travel picked up from a decline a year ago caused by the war in Iraq and the SARS outbreak in Asia.	1	japan airlines profit int travel ap ap japan airlines friday returned profitability half fiscal international travel picked decline ago caused war iraq sars outbreak asia	0	1	3	2	0	6	4	8	9	10	11	7	3	3	15	16	5	11	18
Zimbabwe Jails Briton for 7 Years in Mercenary Case HARARE (Reuters) - A Zimbabwe court jailed British former special services officer Simon Mann for seven years on Friday in a case prosecutors had linked to a foiled coup plot in oil-rich Equatorial Guinea.	1	zimbabwe jails briton mercenary harare reuters zimbabwe court jailed british special services officer simon mann friday prosecutors linked foiled coup plot equatorial guinea	1	0	1	4	1	5	3	2	1	0	8	5	7	8	11	13	6	15	10
Australia: Wallets trump warA majority of Australians oppose the Iraq war, but they turned out to be more concerned about the economy.	1	australia wallets trump wara majority australians oppose iraq war concerned economy	1	0	3	4	1	0	6	6	0	4	8	5	12	14	9	15	6	18	8
Ten Candidates in Palestinian Elections (AP)AP - Ten candidates have qualified to contest the Palestinian presidential elections, set for Jan. 9. They are:	1	ten candidates palestinian elections ap ap ten candidates qualified contest palestinian presidential elections set	1	0	1	4	1	0	6	6	0	4	0	11	0	14	13	8	0	14	7
Government gets tough as South Korea's labor reform sparks protests (AFP)AFP - The South Korean government is warning of tough action against union militancy as legislation aimed at increasing flexibility in South Korea's labor market triggered a head-on collision with labor groups.	1	government tough south korea labor reform sparks protests afp afp south korean government warning tough action union militancy legislation aimed increasing flexibility south korea labor market triggered collision labor	1	0	1	4	1	0	6	6	0	4	0	11	5	0	0	9	13	7	4
CIA accused over Iraq detaineesUS army generals tell a Senate committee that dozens of detainees may have been held in secret in Iraq.	1	cia accused iraq detaineesus army generals senate committee dozens detainees held secret iraq	1	0	1	3	4	4	5	7	2	7	8	5	12	8	9	13	6	15	10
Ex-Guard Speaks Out About Di Tapes(CBS) Newly-surfaced videotapes of the late Princess Diana address her sometimes bizarre relationship with Prince Charles. The tapes were recorded by Diana #39;s voice coach, Peter Settelen.	1	speaks di tapes cbs videotapes late princess diana address bizarre relationship prince charles tapes recorded diana voice coach peter settelen	0	2	2	4	2	2	1	4	7	5	9	2	1	1	1	1	11	5	1
Panel Urges N.Y. to Pay \$14 Billion More for City SchoolsCourt-appointed referees recommended the state pay an additional \$14 billion over four years to improve New York City schools.	1	panel urges pay billion city referees recommended pay additional billion improve york city schools	0	1	3	4	1	5	0	0	1	0	10	7	3	10	15	0	8	16	19
Explosions in Refugee Camp in South Gaza Strip GAZA (Reuters) - Several explosions rocked the house of an Islamic Jihad militant leader in a Palestinian refugee camp in the southern Gaza Strip on Monday, witnesses said.	1	explosions refugee camp south gaza strip gaza reuters explosions rocked house islamic jihad militant leader palestinian refugee camp southern gaza strip monday witnesses	1	0	1	3	4	4	5	7	2	7	6	4	4	7	7	3	4	10	3
British couple shot dead in ThailandA Thai policeman was today being hunted after being accused of killing a British couple near a popular tourist destination last night.	1	british couple shot dead thailanda thai policeman hunted accused killing british couple popular tourist destination night	1	0	1	3	4	4	5	7	2	7	6	4	4	7	7	5	9	3	3
Oil Surges to New Intraday High in Europe (AP)AP - The price of crude oil surged to a new intraday high of US #36;53.42 in European trade Monday, despite assurances from Middle East oil producers that they were committed to bringing the price down as a strike began in Africa's largest exporter.	1	oil surges intraday europe ap ap price crude oil surged intraday european trade monday assurances middle east oil producers committed bringing price strike africa largest exporter	0	1	3	2	0	6	4	8	9	10	11	12	11	3	6	16	17	18	12
Jakarta Embassy Blast Kills 9, Hurts 173JAKARTA, Indonesia - Suspected Muslim militants detonated a car bomb Thursday outside the Australian Embassy in Jakarta, killing nine people and wounding 173 in a bloody strike at a key U.S. ally in the war in Iraq...	1	jakarta embassy blast kills hurts 173jakarta indonesia suspected muslim militants detonated car bomb thursday australian embassy jakarta killing people wounding bloody strike key ally war iraq	1	0	1	3	4	4	5	7	2	7	6	4	4	7	7	5	9	3	3
Shifting signs in North KoreaKim Jong Il dials back his personality cult as protest activities pick up.	1	shifting signs north koreakim jong il dials personality cult protest activities pick	1	0	1	4	1	0	6	6	7	5	9	2	5	0	0	9	13	7	4
Putin Responds to TerrorThe Russian president puts some blame on his international critics -- and supports president Bush	1	putin responds terrorthe russian president blame international critics supports president bush	1	0	1	4	1	0	6	6	0	4	0	11	0	14	13	8	0	14	7
EPA May Conduct Human Tests for Chemicals (AP)AP - In setting limits on chemicals in food and water, the Environmental Protection Agency may rely on industry tests that expose people to poisons and raise ethical questions.	1	epa conduct human tests chemicals ap ap setting limits chemicals food water environmental protection agency rely industry tests expose people poisons raise ethical questions	0	1	1	4	5	5	3	2	8	8	1	0	8	2	4	10	10	13	16
Charting East Asias milestonesIT is a special honour for me to be speaking before such a distinguished gathering, including my illustrious predecessor and his colleagues from Korea and Japan who are all well-known for their visionary ideas and as proponents of East Asian cooperation.	1	charting east asias milestonesit special honour speaking distinguished gathering including illustrious predecessor colleagues korea japan visionary ideas proponents east asian cooperation	1	0	1	4	1	0	6	6	0	4	0	11	5	0	0	9	13	7	4
Taiwan Invites China To Air TalksTaiwan invited China to send envoys to the island to discuss direct charter flights on Monday, a day after Taiwan President Chen Shui-bian called for peace talks between the rivals.	1	taiwan invites china air talkstaiwan invited china send envoys island direct charter flights monday day taiwan president chen called peace talks rivals	1	0	1	4	1	0	6	6	0	4	0	11	5	0	0	9	13	7	4
Islamic group threatens to kill Indian cricketers in Bangladesh (AFP)AFP - A little known radical Islamic group has threatened to kill Indian cricketers when they tour Bangladesh from Tuesday, the Indian High Commission told AFP.	1	islamic threatens kill indian cricketers bangladesh afp afp radical islamic threatened kill indian cricketers tour bangladesh tuesday indian commission told afp	1	0	1	3	4	4	5	7	2	7	8	5	12	7	9	15	9	17	8
Bush Declares Genocide in Sudan's Darfur (Reuters)Reuters - The United States declared on\Thursday that the violence in Sudan's Darfur region amounted to\genocide and urged the world to back an expanded African\peacekeeping force to halt the bloodshed.	1	bush declares genocide sudan darfur reuters reuters united declared violence sudan darfur region amounted urged expanded force halt bloodshed	1	0	1	4	1	0	6	6	0	4	0	11	5	0	0	9	13	7	4
Finnish Watchdog Raps TV Game Operators (Reuters)Reuters - Finland's consumer watchdog said on\Monday it had reprimanded broadcasters for causing children to\run up huge mobile phone bills with interactive television game\and chat programs.	1	finnish watchdog raps tv game operators reuters reuters finland consumer watchdog reprimanded broadcasters causing children huge mobile phone bills interactive television chat programs	0	1	0	1	3	3	7	3	6	9	7	9	6	13	14	6	12	6	13
Sharon Rejects Army Bid to Wind Down Gaza OffensiveIsrael #39;s Ariel Sharon has rejected his army #39;s request to scale back its Gaza offensive, seeking to avoid any show of weakness after deadly bombings in Egyptian resorts crowded with Israelis, security sources said.	1	sharon rejects army bid wind gaza offensiveisrael ariel sharon rejected army request scale gaza offensive seeking avoid weakness deadly bombings egyptian resorts crowded israelis security sources	1	0	1	3	4	4	5	7	2	7	6	4	4	7	7	3	4	10	3
King abdicates after 6 decadesKing Norodom Sihanouk, known as much for his colorful personality as his controversial statesmanship, has been synonymous with Cambodia #39;s modern history for six decades.	1	king abdicates decadesking norodom sihanouk colorful personality controversial statesmanship synonymous cambodia modern history decades	1	0	1	4	1	0	6	6	0	4	0	11	0	14	13	8	0	14	7
Blast Hits Australian Embassy in JakartaA large explosion was set off early Thursday outside the Australian Embassy in Jakarta's financial district, killing at least eight people and wounding more than 150, officials said. Police said the blast appeared to have been a suicide attack using a car bomb.	1	blast hits australian embassy jakartaa explosion set thursday australian embassy jakarta financial district killing people wounding officials police blast appeared suicide attack car bomb	1	0	1	3	4	4	5	7	2	7	6	4	4	7	7	5	9	3	3
Explosives Found Hidden in Closed Russian Cinema ST PETERSBURG, Russia (Reuters) - Police have found explosives, detonators and a gun in a cinema in Russia's second city St Petersburg which was closed for renovation, the Interior Ministry said on Thursday.	1	explosives hidden closed russian cinema st petersburg russia reuters police explosives detonators gun cinema russia city st petersburg closed renovation interior ministry thursday	1	0	1	3	4	4	5	7	2	7	6	4	4	7	7	5	9	3	3
Groups Petition U.S. on China Policies (AP)AP - A group of industry, farm and labor groups, seeking to put pressure on the Bush administration before the presidential election, petitioned the government on Thursday to file an unfair trade practices case against China.	1	petition china policies ap ap industry farm labor seeking pressure bush administration presidential election petitioned government thursday file unfair trade practices china	1	0	1	4	1	0	6	6	0	4	0	11	0	14	13	8	0	14	7
Canada #39;s military ombudsman to investigate troop complaintsCanada #39;s military ombudsman will travel to Afghanistan next week to investigate troop complaints there, it is reported here Sunday.	1	canada military ombudsman investigate troop complaintscanada military ombudsman travel afghanistan week investigate troop complaints reported sunday	1	0	1	3	4	4	5	7	2	7	6	4	4	7	7	5	9	3	3
Infiltration: Who knows better, Army or Patil?NEW DELHI: It appears another instance of the left hand not knowing what the right is doing. Barely hours after Shivraj Patil claimed in Srinagar that there was a drop in infiltration from across the border	1	infiltration army patil delhi appears instance left hand knowing barely hours shivraj patil claimed srinagar drop infiltration border	1	0	1	3	4	4	5	7	2	7	8	5	12	7	9	15	6	15	8
Australia embraced by Malaysia at ASEAN summitTONY EASTLEY: For years Malaysian Prime Minister Dr Mahathir blocked Australia #39;s closer involvement with the ASEAN group of nations.	1	australia embraced malaysia asean summittony eastley malaysian prime minister dr mahathir blocked australia closer involvement asean nations	1	0	1	4	1	0	6	6	0	4	0	11	5	0	0	9	13	7	4
Terms of Endearment Seems that the Bush administration, unlike previous White Houses, is not necessarily averse to allowing its ambassadors to have second tours. For example, word is that John Thomas "Tom " Schieffer , the Texas oilman who brought President Bush into the Texas Rangers baseball club partnership and who is now ambassador to Australia, is to hang out in the Pacific a while longer, t…	1	terms endearment bush administration previous white houses averse allowing ambassadors tours word john thomas tom schieffer texas oilman brought president bush texas rangers baseball club partnership ambassador australia hang pacific time ambassador japan	0	2	2	4	1	0	6	6	0	4	0	11	0	14	13	8	0	14	9
World ; Bigley: I want to live a simple life, the final pleaWorld News, The nearly five-minute tape was released two days after Bigley #39;s family said it had the proof that the 62-year-old engineer from Liverpool was killed.	1	bigley live simple life final pleaworld news tape released days bigley family proof engineer liverpool killed	1	0	1	3	4	4	5	7	2	7	8	5	12	7	9	15	6	15	8
Cause of Indonesian Plane Crash Probed (AP)AP - Investigators picked through the wreckage of an Indonesian passenger plane that crashed in stormy weather, killing at least 32 people in the county's worst air accident in six years.	1	indonesian plane crash probed ap ap investigators picked wreckage indonesian passenger plane crashed stormy weather killing people county worst air accident	1	0	1	3	5	4	5	7	8	8	1	4	4	6	7	5	9	3	3
Landslides, floods kill nearly 340 in PhilippinesMARAGUNDON, Philippines -- A powerful rainstorm triggered landslides and flash floods that killed nearly 340 people in the eastern Philippines, officials said yesterday, and rescuers raced to save those stranded in three coastal towns before a typhoon strikes the hard-hit region.	1	landslides floods kill philippinesmaragundon philippines powerful rainstorm triggered landslides flash floods killed people eastern philippines officials yesterday rescuers raced save stranded coastal towns typhoon strikes region	1	0	1	3	4	4	5	7	2	7	6	4	4	11	12	5	9	3	11
Afghan Militants Hold Talks on Hostages, but No Deal YetMilitants holding three foreign United Nations workers in Afghanistan said that they had held negotiations with officials from the Afghan government and the United	1	afghan militants hold talks hostages deal yetmilitants holding foreign united nations workers afghanistan held negotiations officials afghan government united	1	0	1	3	4	0	6	6	0	4	0	5	12	0	9	9	13	7	8
Ballots Pour Into Afghan Counting CentersKABUL, Afghanistan - Ballot boxes poured into counting centers Monday for a tally of the disputed presidential election in Afghanistan amid signs an opposition boycott was wavering after at least two candidates agreed to accept the ruling of an independent panel's inquiry. Election organizers hope their decision, announced late Sunday, to establish a panel…	1	ballots pour afghan counting centerskabul afghanistan ballot boxes poured counting centers monday tally disputed presidential election afghanistan amid signs opposition boycott wavering candidates agreed accept ruling independent panel inquiry election organizers hope decision announced late sunday establish panel foreign election experts investigate balloting boycott fear undermine winner abilit…	1	0	1	4	1	0	6	6	0	4	0	11	0	14	13	8	0	14	7
Son Is Gone but Fervor Remains After FallujahAfter his son's life was ended by an American bullet, an Iraqi insurgent undertook a harrowing escape to a lonely exile in Baghdad, where he waits to fight another day.	1	son fervor remains fallujahafter son life american bullet iraqi insurgent undertook harrowing escape lonely exile baghdad waits fight day	1	0	1	3	4	4	5	7	2	7	6	5	12	7	10	15	9	17	8
Pentagon #39;s death toll in Iraq risingWASHINGTON - November was the bloodiest month for US troops in Iraq since April, with at least 135 losing their lives and more than 50 falling in the two-week battle to evict insurgents from Fallujah.	1	pentagon death toll iraq risingwashington november bloodiest month troops iraq april losing lives falling battle evict insurgents fallujah	1	0	1	3	4	4	5	7	2	7	6	5	12	7	10	15	9	17	8
UK Train Line to Be Closed for Days #39; After Fatal DerailmentA main rail line between London and southwest England will remain closed for a number of days #39; #39; as UK police investigate the weekend derailment of a FirstGroup Plc train, in which seven people lost their lives.	1	uk train closed days fatal derailmenta main rail london southwest england remain closed days uk police investigate weekend derailment firstgroup plc train people lost lives	1	0	1	3	4	4	5	7	2	7	6	4	4	7	7	5	9	3	3
Chicoutimi #39;was seaworthy #39;A submarine left stranded in the Atlantic after a fire was seaworthy when it left the UK, the Canadian navy has said. The second-hand vessel was sold to Canada by the Royal Navy who earlier denied a refit was botched.	1	chicoutimi seaworthy submarine left stranded atlantic fire seaworthy left uk canadian navy vessel sold canada royal navy earlier denied refit botched	1	0	1	3	5	4	5	7	8	8	8	0	8	6	9	13	6	15	19
Cosatu to meet over conflict with ANCThe Congress of South African Trade Unions (Cosatu) said that it will hold a lunchtime press conference on Tuesday to discuss the controversial public spat between its leader Zwelinzima Vavi and the African National Congress (ANC) national spokesperson	1	cosatu meet conflict ancthe congress south african trade unions cosatu hold lunchtime press conference tuesday controversial public spat leader zwelinzima vavi african national congress anc national spokesperson	1	0	1	4	1	0	6	6	0	4	0	11	5	0	0	9	13	7	4
Renault unveils investment plan for Asian hub in South Korea (AFP)AFP - French auto giant Renault SA said it will invest some 570 million dollars in South Korea over the next three years as part of its global strategy to become a key player in Asia, notably China.	1	renault unveils investment plan asian hub south korea afp afp french auto giant renault sa invest dollars south korea global strategy key player asia notably china	0	1	3	4	1	0	6	6	0	4	0	11	5	0	0	9	13	7	4
Philippine Floods Kill HundredsMore than 300 people died after flash floods and landslides devastated three coastal towns and left swathes of the northern Philippines under water on Tuesday.	1	philippine floods kill hundredsmore people died flash floods landslides devastated coastal towns left swathes northern philippines water tuesday	1	0	1	3	4	4	5	7	2	7	6	4	4	11	12	5	9	12	11
Sihamoni ready to take over:PHNOM PENH, Oct. 10. - King Norodom Sihanouk declared on Sunday that his son, Crown Prince Norodom Sihamoni is ready to accept kingship.	1	sihamoni ready phnom penh king norodom sihanouk declared sunday son crown prince norodom sihamoni ready accept kingship	1	0	1	4	1	0	6	6	0	4	0	11	0	14	13	8	0	14	7
Study: Few Americans Buy Drugs OnlineNEW YORK - Only 4 percent of Americans have ever used the Internet to buy prescription drugs - and even fewer do so through foreign pharmacies - despite Web sites maintained by a handful of states to help citizens import medicines more cheaply from Canada, a new study finds. A majority - 62 percent - believe drugs bought online are less safe than those purchas…	1	study americans buy drugs onlinenew york percent americans internet buy prescription drugs fewer foreign pharmacies web sites maintained handful citizens import medicines cheaply canada study majority percent drugs bought online safe purchased local pharmacy accepting federal government stated concerns opposing drug imports pew internet american life project report sunday	0	1	3	2	5	5	3	2	1	0	10	8	7	2	14	10	10	13	16
Russian millionaire's party heads Lithuania poll, but coalition needed (AFP)AFP - A party led by a Russian-born millionaire won the most votes in the first round parliamentary elections in Lithuania, but apparently not enough to form a government on its own, initial results showed.	1	russian millionaire party heads lithuania poll coalition afp afp party led millionaire won votes round parliamentary elections lithuania form government initial	1	0	1	4	1	0	6	6	0	4	0	11	0	14	13	8	0	14	7
9/10/04 - INDIA-PAKISTAN DIALOGUEThe foreign ministers of India and Pakistan have concluded another round of peace talks. The talks in Indias capital, New Delhi, set the stage for an expected meeting at the United Nations later this month	1	dialoguethe foreign ministers india pakistan concluded round peace talks talks indias capital delhi set stage expected meeting united nations month	1	0	1	4	1	0	6	6	0	4	0	11	5	0	0	9	13	7	4
New Brussels blow for Turkey #39;s EU hopesEU farm commissioner Franz Fischler on Friday became the latest Brussels critic to raise doubts over Turkey #39;s hopes of joining the bloc, as wrangling over Ankara #39;s EU bid heats up.	1	brussels blow turkey eu hopeseu farm commissioner franz fischler friday brussels critic raise doubts turkey hopes joining bloc wrangling ankara eu bid heats	1	0	3	4	1	0	6	6	0	4	0	11	5	0	0	9	13	7	4
Darfur Rebels Urge Nigeria To Intervene, Kickstart Sudan Peace &lt;b&gt;...&lt;/b&gt;Rebel leaders from Sudan #39;s Darfur region called on Thursday on Nigeria to intervene and kickstart African Union-sponsored talks on the crisis in the west of Sudan	1	darfur rebels urge nigeria intervene kickstart sudan peace lt gt lt gt rebel leaders sudan darfur region called thursday nigeria intervene kickstart african talks crisis west sudan	1	0	1	3	4	0	6	6	0	4	0	11	5	0	0	9	13	7	4
Chinese engineers kidnapped in PakistanISLAMABAD - Tribal elders in Pakistan #39;s South Waziristan tribal area and local administration officials are negotiating with the kidnappers of two Chinese engineers to secure their release, a government spokesman said Sunday.	1	chinese engineers kidnapped pakistanislamabad tribal elders pakistan south waziristan tribal local administration officials negotiating kidnappers chinese engineers secure release government spokesman sunday	1	0	1	3	4	4	5	7	2	7	8	5	12	0	9	15	6	15	8
Rumsfeld says US is winning the war as bomb attacks kill 18Bombs in Baghdad killed 18 people as the US Defence Secretary, Donald Rumsfeld, declared that America was winning the war against insurgency during a visit to Iraq.	1	rumsfeld winning war bomb attacks kill 18bombs baghdad killed people defence secretary donald rumsfeld declared america winning war insurgency visit iraq	1	0	1	3	4	4	5	7	2	7	6	4	12	7	7	5	9	3	3
Senate Resolves Corporate Tax Bill DelayWASHINGTON - The Senate late Sunday resolved a dispute delaying passage of a sweeping corporate tax bill and two spending bills for disaster relief and homeland security, clearing the way for senators to adjourn Monday to hit the campaign trail. The agreement removed parliamentary roadblocks thrown up by Sen...	1	senate resolves corporate tax bill delaywashington senate late sunday resolved dispute delaying passage sweeping corporate tax bill spending bills disaster relief homeland security clearing senators adjourn monday hit campaign trail agreement removed parliamentary roadblocks thrown sen	0	0	1	4	1	0	6	6	0	4	0	11	0	14	13	8	0	14	7
Princess Di's Ex-Bodyguard Disputes Claim (AP)AP - A former bodyguard of Princess Diana on Tuesday dismissed her claim that one of her lovers was "bumped off."	1	princess di disputes claim ap ap bodyguard princess diana tuesday dismissed claim lovers bumped	0	2	2	4	1	5	3	2	1	0	8	8	7	8	11	13	1	1	10
Iraqis Fearing a Sunni Boycott of the ElectionLeaders of Iraq's Sunni minority say they have failed to generate any enthusiasm for nationwide elections scheduled for January.	1	iraqis fearing sunni boycott electionleaders iraq sunni minority failed generate enthusiasm nationwide elections scheduled january	1	0	1	3	4	4	5	7	2	7	6	5	12	7	10	15	9	17	8
India must recognize international realities: PMPrime Minister Manmohan Singh has responded to the Left #39;s criticism of his congratulatory call to US President George W. Bush by saying India must recognise international realities.	1	india recognize international realities pmprime minister manmohan singh responded left criticism congratulatory call president george bush india recognise international realities	1	0	1	4	1	0	6	6	0	4	0	11	5	0	0	9	13	7	4
Changes to Nigeria union billThe Nigerian senate passes a bill to curb the power of the trade unions, but amends the no-strike clause.	1	nigeria union billthe nigerian senate passes bill curb power trade unions amends clause	1	0	1	4	1	0	6	6	0	4	0	11	5	0	0	9	13	11	18
Cellphone Industry Hits Snag as It Woos Untapped MarketThe mobile phone industry is turning its attention to the last untapped demographic - people over 65.	1	cellphone industry hits snag woos untapped marketthe mobile phone industry attention untapped demographic people	0	1	0	1	3	3	7	3	6	9	7	9	6	13	14	6	12	6	13
Jakarta bombing blamed on Malaysian fugitivesThe Indonesian police asserted Friday it would intensify the hunt of two Malaysian fugitives Azahari and Noordin Moh Top believed to be responsible for the Thursday #39;s bombing at the Australian embassy.	1	jakarta bombing blamed malaysian fugitivesthe indonesian police asserted friday intensify hunt malaysian fugitives azahari noordin moh top believed responsible thursday bombing australian embassy	1	0	1	3	4	4	5	7	2	7	6	4	4	7	7	5	9	3	3
Ken Caminiti, 1996 NL MVP, Dies at Age 41NEW YORK - Ken Caminiti, the 1996 National League MVP who later admitted using steroids during his major league career, died Sunday. He was 41...	1	ken caminiti nl mvp dies age 41new york ken caminiti national league mvp admitted steroids major league career died sunday	0	2	2	0	2	2	1	5	5	3	3	3	9	4	8	11	3	9	16
Skirmish outside Gaza camp kills 5GAZA CITY -- Palestinian gunmen and Israeli troops fought pitched battles Thursday on the outskirts of the largest refugee camp in the Gaza Strip, with schoolchildren scampering through sandy alleyways just yards from the fighting.	1	skirmish gaza camp kills 5gaza city palestinian gunmen israeli troops fought pitched battles thursday outskirts largest refugee camp gaza strip schoolchildren scampering sandy alleyways yards fighting	1	0	1	3	4	4	5	7	2	7	6	4	4	7	7	3	4	10	3
Car bombs kill 11 in BaghdadBAGHDAD -- Two car bombs in Baghdad killed at least 11 people yesterday, including one American soldier, and Defense Secretary Donald Rumsfeld visited US troops and diplomats in the capital and at a remote desert air base.	1	car bombs kill baghdadbaghdad car bombs baghdad killed people yesterday including american soldier defense secretary donald rumsfeld visited troops diplomats capital remote desert air base	1	0	1	3	4	4	5	7	2	7	6	4	4	7	7	5	9	3	3
Chercher dans toute l #39;actualitItaly ground to a halt as millions of workers observed a general strike in protest against the economic policies of Prime Minister Silvio Berlusconi #39;s centre-right government.	1	chercher dans toute actualititaly ground halt millions workers observed strike protest economic policies prime minister silvio berlusconi government	1	0	1	4	1	0	6	6	0	4	0	11	5	0	0	9	13	7	4
Colts Lead Pats Early in Third QuarterFOXBORO, Mass. - Peyton Manning reached the 25,000-yard passing mark faster than anyone but Dan Marino, and the Indianapolis Colts shredded the New England Patriots for a 17-13 halftime lead Thursday night...	1	colts lead pats quarterfoxboro mass peyton manning reached passing mark faster dan marino indianapolis colts shredded england patriots halftime lead thursday night	0	2	2	0	2	2	1	4	7	5	9	2	1	1	1	1	11	5	1
Ten Turkish hostages freed in IraqThe men, who work for the Ankara-based construction company Vinsan, were kidnapped on September 18 by a militant organisation that identified itself as Salafist Abu Bakr al-Seddiq Group.	1	ten turkish hostages freed iraqthe construction company vinsan kidnapped september militant organisation identified salafist abu bakr	1	0	1	3	4	4	5	7	2	7	8	5	12	7	9	15	6	15	8
Two Charged in S. African Nuclear Trafficking CaseJOHANNESBURG, Sept. 9 -- A German man and his colleague appeared in court Thursday on charges of violating South Africa #39;s ban against nuclear proliferation, according to news reports.	1	charged african nuclear trafficking casejohannesburg german colleague appeared court thursday charges violating south africa ban nuclear proliferation news reports	1	0	1	4	1	0	3	2	1	0	8	8	5	0	0	9	13	7	4
Ivan devastates GrenadaST. GEORGE #39;S, Grenada - Hurricane Ivan took aim yesterday at Jamaica after killing 23 people in five countries and devastating Grenada.	1	ivan devastates grenadast george grenada hurricane ivan aim yesterday jamaica killing people countries devastating grenada	1	0	1	3	5	4	5	7	2	7	6	4	4	11	12	5	9	12	11
Legendary all-rounder Miller diesKeith Miller, arguably Australia's greatest all-rounder in Test cricket, has died in Melbourne aged 84.	1	legendary miller dieskeith miller arguably australia test cricket died melbourne aged	0	2	2	0	2	1	2	1	4	1	2	10	2	9	3	12	16	2	5
Bin Laden Deputy: U.S. Will Be Defeated (AP)AP - Osama bin Laden's chief deputy proclaimed the United States will ultimately be defeated in Iraq and Afghanistan in a videotape broadcast Thursday that appeared to be a rallying call for al-Qaida ahead of the anniversary of the Sept. 11 attacks.	1	bin laden deputy defeated ap ap osama bin laden chief deputy proclaimed united ultimately defeated iraq afghanistan videotape broadcast thursday appeared rallying call ahead anniversary attacks	1	0	1	3	4	4	3	2	2	7	8	5	12	8	9	13	6	15	10
Earthquakes Shake Central Japan; Bullet Train Resumed (Update4)A series of earthquakes shook central Japan in Niigata prefecture, where quakes that began last month have killed more than 30 people.	1	earthquakes shake central japan bullet train resumed update4 series earthquakes shook central japan niigata prefecture quakes month killed people	1	0	1	3	4	4	5	7	2	7	6	4	4	7	7	5	9	3	3
Pakistan bombs suspected al-Qaida campAyman al- Zawahiri, second in command of al-Qaida, said last night that the US faced defeat in Iraq and Afghanistan. In a videotape broadcast by the Arab satellite television station al-Jazeera, he said: quot;The	1	pakistan bombs suspected campayman zawahiri command night faced defeat iraq afghanistan videotape broadcast arab satellite television station quot	1	0	1	3	4	4	5	7	2	7	8	5	12	7	9	15	6	15	3
Grenada In Crisis - Friday 10, September-2004DESPAIR is setting in among the 80 000 homeless Grenadians who, ravaged and traumatised by the damage done to them by Hurricane Ivan, exist each day with no food, no water and no hope.	1	grenada crisis friday setting homeless grenadians ravaged traumatised damage hurricane ivan exist day food water hope	1	0	1	3	5	4	4	8	8	8	1	0	8	11	12	5	15	12	11
Low Turnout Sinks Macedonian Bid to Kill Rights Bill SKOPJE (Reuters) - A referendum bid to block a law that gives Macedonia's Albanian minority more rights failed on Sunday, upholding a Western-brokered peace plan which ended ethnic fighting in 2001.	1	low turnout sinks macedonian bid kill rights bill skopje reuters referendum bid block law macedonia albanian minority rights failed sunday upholding peace plan ethnic fighting	1	0	1	4	1	0	6	6	0	4	0	11	0	14	13	8	0	14	7
Web Site Shows Two Beheadings in IraqThree hooded gunmen pose with an unidentified Turkish hostage, who they threatened to behead unless all American release all Iraq prisoners, and all Turks leave Iraq, in this image made from a television broadcast by Al-Arabiya television, Monday Oct.	1	web site beheadings iraqthree hooded gunmen pose unidentified turkish hostage threatened behead american release iraq prisoners turks leave iraq image television broadcast television monday oct	1	0	1	3	4	4	5	7	2	7	8	5	12	7	9	15	6	15	8
Israel's Sharon Survives Two No-Confidence Votes (Reuters)Reuters - Prime Minister Ariel Sharon survived\two no-confidence votes in Israel's parliament on Monday,\clinging to power as he seeks to push through a disputed plan\for withdrawal from some occupied territory.	1	israel sharon survives votes reuters reuters prime minister ariel sharon votes israel parliament monday power seeks push disputed withdrawal occupied territory	1	0	1	4	1	0	6	6	0	4	0	11	0	14	13	3	4	10	7
Britain: Body Isn't Kidnapped Aid Worker (AP)AP - A mutilated body found in Iraq is not that of kidnapped aid worker Margaret Hassan, the British government said Wednesday. But the Foreign Office said it continued to believe Hassan had been murdered, although the evidence was not conclusive.	1	britain body kidnapped aid worker ap ap mutilated body iraq kidnapped aid worker margaret hassan british government wednesday foreign office continued hassan murdered evidence conclusive	1	0	1	3	4	4	5	7	2	7	8	5	12	7	9	15	6	15	8
Iraqi nuclear assets #39;are missing #39;Equipment which could be used to make nuclear arms has been vanishing from Iraq, the United Nations has been warned. Satellite images show entire nuclear plants appear to have been dismantled.	1	iraqi nuclear assets missing equipment nuclear arms vanishing iraq united nations warned satellite images entire nuclear plants dismantled	1	0	1	4	1	0	6	6	0	4	0	11	5	0	0	9	13	7	4
46 Killed, 270 Injured In Iraqi ViolenceBaghdad, Sept. 8 (NNN): Bloody clashes on Tuesday between US forces and Shia militiamen left more than 46 persons, including six US soldiers, dead across Iraq during the past 24 hours, officials said here on Wednesday.	1	killed injured iraqi violencebaghdad nnn bloody clashes tuesday forces shia militiamen left persons including soldiers dead iraq hours officials wednesday	1	0	1	3	4	4	5	7	2	7	6	4	12	7	10	15	9	17	8
Sharon Seeks Wider Govt. to Save Gaza Pullout Plan JERUSALEM (Reuters) - Israeli Prime Minister Ariel Sharon launched new efforts Tuesday to widen his shaky coalition after a stinging setback in parliament that complicated his plan to withdraw from some occupied territory.	1	sharon seeks wider govt save gaza pullout plan jerusalem reuters israeli prime minister ariel sharon launched efforts tuesday widen shaky coalition stinging setback parliament complicated plan withdraw occupied territory	1	0	1	4	1	0	6	6	0	4	0	11	0	14	13	3	4	10	7
Landmine kills Darfur aid workersTwo aid workers are killed in Sudan's Darfur region after their vehicle hit a landmine.	1	landmine kills darfur aid workerstwo aid workers killed sudan darfur region vehicle hit landmine	1	0	1	3	4	4	5	7	2	7	6	4	4	0	0	9	13	7	4
Israel to present PA with #39;good will #39; steps in coming daysIsrael will respond with a series of positive gestures if the successors to Palestinian Authority Chairman Yasser Arafat will implement security reforms and a quot;real quot; cease-fire felt on the ground in the territories, Israeli security and diplomatic sources	1	israel pa steps coming daysisrael respond series positive gestures successors palestinian authority chairman yasser arafat implement security reforms quot real quot ground territories israeli security diplomatic sources	1	0	1	4	1	0	6	6	0	4	0	11	5	0	0	3	4	10	4
Afghan Militants Say Drop Some Hostage Demands KABUL (Reuters) - Afghan militants holding three U.N. workers hostage began talks with the government and the United Nations on Sunday and the kidnappers have dropped some of their demands, a militant spokesman said.	1	afghan militants drop hostage demands kabul reuters afghan militants holding workers hostage talks government united nations sunday kidnappers dropped demands militant spokesman	1	0	1	3	4	4	5	7	2	7	8	5	12	7	9	15	6	15	8
Sharon Seeks Wider Government to Save Gaza Pullout Plan JERUSALEM (Reuters) - Israeli Prime Minister Ariel Sharon launched new efforts on Tuesday to widen his shaky coalition after a stinging setback in parliament that complicated his plan to withdraw from some occupied territory.	1	sharon seeks wider government save gaza pullout plan jerusalem reuters israeli prime minister ariel sharon launched efforts tuesday widen shaky coalition stinging setback parliament complicated plan withdraw occupied territory	1	0	1	4	1	0	6	6	0	4	0	11	0	14	13	3	4	10	7
Peru's Toledo Wants New Judges for Guzman Retrial&lt;p&gt;&lt;/p&gt;&lt;p&gt; By Jude Webber&lt;/p&gt;&lt;p&gt; LIMA, Peru (Reuters) - Peruvian President Alejandro Toledosaid on Saturday he wanted new judges to try Shining Pathleader Abimael Guzman after the "shameful spectacle" he stagedat the start of his terrorism retrial, punching the air withhis fist and chanting rebel slogans.&lt;/p&gt;	1	peru toledo judges guzman retrial lt gt lt gt lt gt jude webber lt gt lt gt lima peru reuters peruvian president alejandro toledosaid saturday judges shining pathleader abimael guzman shameful spectacle stagedat start terrorism retrial punching air withhis fist chanting rebel lt gt	1	0	1	4	1	5	0	0	1	0	10	7	3	10	15	0	5	16	0
Princess Diana Fountain to Close Again (AP)AP - It has been fenced in, clogged with leaves, overrun with visitors and even used as a dog bath. Now the Princess Diana memorial fountain is to close again to replace surrounding grass that has become sodden with splashing water, park officials said Tuesday.	1	princess diana fountain close ap ap fenced clogged leaves overrun visitors dog bath princess diana memorial fountain close replace surrounding grass sodden splashing water park officials tuesday	1	2	2	0	5	4	5	7	8	8	1	0	8	11	12	5	15	12	9
Battles rage across MosulMOSUL, Iraq -- US and Iraqi troops stormed insurgent-held police stations and neighborhoods in this northern city Tuesday, retaking a number of sites seized last week by gunmen who rose up in support of militants in Fallujah.	1	battles rage mosulmosul iraq iraqi troops stormed police stations neighborhoods northern city tuesday retaking sites seized week gunmen rose support militants fallujah	1	0	1	3	4	4	5	7	2	7	6	4	12	7	10	15	9	17	8
Militants holding UN workers say talks have been postponedMilitants threatening to kill three UN hostages said yesterday that talks with Afghan and UN officials had been postponed for another day.	1	militants holding workers talks postponedmilitants threatening kill hostages yesterday talks afghan officials postponed day	1	0	1	3	4	4	5	7	2	7	6	5	12	7	9	15	9	17	8
India's low-cost airline eyes business travel (AFP)AFP - India's pioneer low-cost carrier Air Deccan plans to raise 50 million dollars in private equity by shedding a 26 percent stake and also aims to enter the corporate business jet segment, its chairman said.	1	india airline eyes business travel afp afp india pioneer carrier air deccan plans raise dollars private equity shedding percent stake aims enter corporate business jet segment chairman	0	1	3	2	0	5	0	0	9	10	10	7	3	10	15	0	8	11	19
U.S. Says N.Korea Miscalculating by Stalling on Talks TOKYO (Reuters) - The United States accused North Korea Tuesday of miscalculation by refusing to resume talks on its nuclear programs before the U.S. presidential election while China renewed a diplomatic drive to end the stalemate.	1	miscalculating stalling talks tokyo reuters united accused north korea tuesday miscalculation refusing resume talks nuclear programs presidential election china renewed diplomatic drive stalemate	1	0	1	4	1	0	6	6	0	4	0	11	5	0	0	9	13	7	4
Poland opens Katyn probePolish war crimes prosecutors examine the 1940 deaths of members of the Polish elite in Russia's Katyn Forest.	1	poland katyn probepolish war crimes prosecutors examine deaths polish elite russia katyn forest	1	0	1	4	1	0	3	2	0	4	8	5	7	8	11	13	6	15	10
Cheney: Kerry 'Wrong Choice' for President (AP)AP - Vice President Dick Cheney said Tuesday that the nation faces the threat of another terrorist attack if voters make the "wrong choice" on Election Day, suggesting that Sen. John Kerry would follow a pre-Sept. 11 policy of reacting defensively.	1	cheney kerry choice president ap ap vice president dick cheney tuesday nation threat terrorist attack voters wrong choice election day suggesting john kerry follow policy reacting defensively	1	0	1	4	1	0	6	6	0	4	0	11	0	14	13	8	0	14	7
Oil Prices, Earnings Send Stocks LowerNEW YORK - Investors sent stocks lower Tuesday as oil prices crossed another milestone, \$54 per barrel. Earnings reports from heavyweights Johnson Johnson and Merrill Lynch Co...	1	oil prices earnings send stocks lowernew york investors stocks lower tuesday oil prices crossed milestone barrel earnings reports heavyweights johnson johnson merrill lynch	0	1	3	2	0	6	4	8	9	10	11	12	11	3	6	16	17	18	12
Ukrainian opposition makes gainsKIEV -- The Ukrainian parliament voted yesterday to dismiss the government headed by the declared winner of a disputed presidential vote, Prime Minister Viktor Yanukovych, handing the opposition a victory in its campaign to overturn national election results.	1	ukrainian opposition gainskiev ukrainian parliament voted yesterday dismiss government headed declared winner disputed presidential vote prime minister viktor yanukovych handing opposition victory campaign overturn national election	1	0	1	4	1	0	6	6	0	4	0	11	0	14	13	8	0	14	7
England's Lawyers Try to Get Photos Thrown OutLawyers for Pfc. Lynndie R. England sought Wednesday to throw out evidence at the heart of the Abu Ghraib prison scandal -- the now-infamous photos showing her smiling and pointing at naked Iraqi detainees.	1	england lawyers photos thrown outlawyers pfc lynndie england sought wednesday throw evidence heart abu ghraib prison scandal photos smiling naked iraqi detainees	1	0	1	4	1	5	3	2	1	0	8	5	7	8	11	13	6	15	10
Bad weather blamed for Indon crashBAD weather was the main cause of an accident which killed 26 people aboard an airplane whose spoiler did not work well, Indonesian investigators said today.	1	bad weather blamed indon crashbad weather main accident killed people aboard airplane spoiler indonesian investigators	1	0	1	3	5	4	5	7	2	7	6	4	4	7	7	5	9	3	3
Mugabe Urges Party Unity Amid Succession Struggle HARARE (Reuters) - Zimbabwe President Robert Mugabe called for unity on Thursday amid rare public jostling within his ruling ZANU-PF party over who will eventually succeed the controversial 80-year-old leader.	1	mugabe urges party unity amid succession struggle harare reuters zimbabwe president robert mugabe called unity thursday amid rare public jostling ruling party eventually succeed controversial leader	1	0	1	4	1	0	6	6	0	4	0	11	0	14	13	8	0	14	7
Presidential winner faces 'twin deficits' battle (AFP)AFP - Whoever wins the November 2 presidential election will inherit massive budget and trade deficits that pose huge economic challenges that will give little relief for President George W. Bush or rival John Kerry.	1	presidential winner deficits battle afp afp wins november presidential election inherit massive budget trade deficits pose huge economic challenges relief president george bush rival john kerry	1	0	1	4	1	0	6	6	0	4	0	11	0	14	13	8	0	14	7
Campaigning Begins for Afghan Election (AP)AP - Afghanistan's historic election campaign got under way Tuesday, pitting 17 hopefuls against interim leader Hamid Karzai in the race to become the impoverished country's first popularly elected president.	1	campaigning afghan election ap ap afghanistan historic election campaign tuesday pitting hopefuls interim leader hamid karzai race impoverished country popularly elected president	1	0	1	4	1	0	6	6	0	4	0	11	0	14	13	8	0	14	7
EU offering economic incentives to Iran to suspend uranium &lt;b&gt;...&lt;/b&gt;CARROT AND STICK: The EU is hoping Iran will cease its nuclear program before the IAEA meets later this month. Another option could be economic sanctions.	1	eu offering economic incentives iran suspend uranium lt gt lt gt carrot stick eu hoping iran cease nuclear program iaea meets month option economic sanctions	1	1	3	4	1	0	6	6	0	4	0	11	5	0	0	9	13	7	4
Hostage-taker snubs rescue teamA PAKISTANI militant leader linked to al-Qaeda said today he refused to meet a council of tribal elders trying to secure the release of two Chinese hostages held by his group.	1	snubs rescue teama pakistani militant leader linked refused meet council tribal elders secure release chinese hostages held	1	0	1	3	4	4	5	7	2	7	8	5	12	7	9	15	6	15	8
Blast Near Convoy of Palestinian Security Chief (Reuters)Reuters - An explosion occurred near the convoy of a\Palestinian security chief in the Gaza Strip on Tuesday,\witnesses said.	1	blast convoy palestinian security chief reuters reuters explosion occurred convoy security chief gaza strip tuesday	1	0	1	3	4	4	5	7	2	7	6	4	4	7	7	3	4	3	3
Blair, Bush to Meet as Middle East Issues LoomBritish Prime Minister Tony Blair, who has pushed for progress on Middle East peace talks and is one of the United States #39; closest allies, will meet with President Bush next week, the White House said on Saturday.	1	blair bush meet middle east issues loombritish prime minister tony blair pushed progress middle east peace talks united closest allies meet president bush week white house saturday	1	0	1	4	1	0	6	6	0	4	0	11	5	0	0	9	13	7	4
Germany deports Turkey militantGerman police deport an Islamic militant wanted by Turkey, hours after his extradition is approved.	1	germany deports turkey militantgerman police deport islamic militant turkey hours extradition approved	1	0	1	3	4	4	5	7	2	7	8	5	12	7	9	15	6	15	8
Silence the loose cannonsThe US presidential election is finally over! Now the hard part begins. I #39;m not talking about getting North Korea back to the negotiating table; that will come soon enough.	1	silence loose cannonsthe presidential election finally hard talking north korea negotiating table	1	0	1	4	1	0	6	6	0	4	0	11	0	14	13	8	0	14	7
Fierce Clashes in Iraq Kill 36; 203 HurtUS troops battled Shiite militiamen loyal to rebel cleric Muqtada al-Sadr in the Baghdad slum of Sadr City on Tuesday in fierce fighting that killed 36 people, including	1	fierce clashes iraq kill hurtus troops battled shiite militiamen loyal rebel cleric muqtada baghdad slum sadr city tuesday fierce fighting killed people including	1	0	1	3	4	4	5	7	2	7	6	5	12	7	10	15	9	17	8
For Bush, Kerry, Iraq Is More Than a War (AP)AP - President Bush and Sen. John Kerry are using Iraq to advance their negative campaign tactics as the U.S. military death toll in Iraq tops 1,000. War, it seems, is just another excuse to call the other guy names.	1	bush kerry iraq war ap ap president bush john kerry iraq advance negative campaign tactics military death toll iraq tops war excuse call guy names	1	0	1	4	1	0	6	6	0	4	0	11	0	14	13	8	0	14	7
Gunfire Erupts During Powell Visit to Haiti PORT-AU-PRINCE, Haiti (Reuters) - Shooting erupted on Wednesday outside Haiti's presidential palace while Secretary of State Colin Powell was inside talking with the interim leaders of the violence-plagued country.	1	gunfire erupts powell visit haiti haiti reuters shooting erupted wednesday haiti presidential palace secretary colin powell inside talking interim leaders country	1	0	1	3	4	0	6	6	0	4	0	11	5	0	0	9	13	7	4
Arafat #39;s legacy: Statelessness for PalestiniansThe exit from the world stage of Palestinian leader and icon Yasser Arafat will mark the end of a turbulent era, and the beginning of a period of uncertainty and possible instability in the volatile cauldron of the Israeli-Palestinian conflict.	1	arafat legacy statelessness palestiniansthe exit stage palestinian leader icon yasser arafat mark turbulent era period uncertainty instability volatile cauldron conflict	1	0	1	4	4	0	6	6	0	4	0	11	5	14	0	3	4	10	4
Afghanistan heads for vote countAfghans arrange votes in Kabul, capital of Afghanistan, Oct. 11, 2004. The Afghan Joint Electoral Management Body decided on Monday to suspend vote counting and start to investigate into the voting process.	1	afghanistan heads vote countafghans arrange votes kabul capital afghanistan afghan joint electoral management body decided monday suspend vote counting start investigate voting process	1	0	1	4	1	0	6	6	0	4	0	11	0	14	13	8	0	14	7
Sadr #39;s men cash in their gunsBAGHDAD: Members of radical cleric Moqtada al-Sadr #39;s militia began handing back their weapons yesterday under a deal with the interim Iraq Government, while two US soldiers were killed in a Baghdad rocket attack.	1	sadr cash gunsbaghdad radical cleric moqtada militia handing weapons yesterday deal interim iraq government soldiers killed baghdad rocket attack	1	0	1	3	4	4	5	7	2	7	6	5	12	7	10	15	9	17	8
Hurricanes May Affect Florida PoliticsTALLAHASSEE, Fla. - Two devastating hurricanes have given President Bush something his political advisers couldn't dream up: the chance to play comforter in chief in a battleground state he is determined to win again...	1	hurricanes affect florida politicstallahassee devastating hurricanes president bush political advisers dream chance play comforter chief battleground determined win	0	2	2	4	5	0	6	6	0	4	0	11	0	11	12	8	0	12	11
China's worst floods in a century kill at least 172, injure thousandsBEIJING -- China's Sichuan province faced the threat of epidemics yesterday after the worst flooding in a century killed at least 172 people and left scores missing, while water levels at the huge Three Gorges Dam swelled.	1	china worst floods century kill injure thousandsbeijing china sichuan province faced threat epidemics yesterday worst flooding century killed people left scores missing water levels huge gorges dam swelled	1	0	1	3	4	4	5	7	2	7	6	4	4	11	7	5	9	3	3
Cambodia Prince Moves Closer to Throne (AP)AP - The son of King Norodom Sihanouk moved closer Monday to becoming Cambodia's new monarch after legal hurdles were cleared in the complicated succession process triggered by the surprise abdication of his father last week.	1	cambodia prince moves closer throne ap ap son king norodom sihanouk moved closer monday cambodia monarch legal hurdles cleared complicated succession process triggered surprise abdication father week	1	0	1	4	1	0	6	6	0	4	0	11	0	14	13	3	4	10	7
Afghan officials meet kidnappers to seek release of UN workers &lt;b&gt;...&lt;/b&gt;KABUL (AFP) - Militants claiming to hold three foreign UN workers met Afghan officials on Sunday and gave them a list of 26 prisoners whom they want to swap for their hostages, a spokesman for the group said.	1	afghan officials meet kidnappers seek release workers lt gt lt gt kabul afp militants claiming hold foreign workers met afghan officials sunday list prisoners swap hostages spokesman	1	0	1	3	4	4	5	7	2	7	8	5	12	7	9	15	6	15	8
Egypt steps back on Gaza plan over Israeli attacksEgypt took a step back from plans to help the Palestinians prepare for an Israeli withdrawal from Gaza on Wednesday, saying it could not play its role in full as long as Israeli attacks on Palestinians continue.	1	egypt steps gaza plan israeli attacksegypt step plans palestinians prepare israeli withdrawal gaza wednesday play role israeli attacks palestinians continue	1	0	1	3	4	4	5	7	2	7	6	4	4	7	7	3	4	10	3
An Afghan 'hanging chad' disputeAn independent inquiry is helping to defuse a controversy over ink used in Saturday's election.	1	afghan chad disputean independent inquiry helping defuse controversy ink saturday election	1	0	1	4	1	0	6	6	0	4	0	11	0	14	13	8	0	14	7
Hezbollah flies unmanned plane over IsraelHezbollah sent an unmanned reconnaissance plane over Israeli airspace Sunday, the Lebanon-based group and the Israeli military said.	1	hezbollah flies unmanned plane israelhezbollah unmanned reconnaissance plane israeli airspace sunday israeli military	1	0	1	3	4	4	5	7	8	8	6	0	8	6	7	3	4	10	17
Arafat Said to Have Liver Failure; PM to Visit PARIS (Reuters) - Yasser Arafat, critically ill in a Paris hospital, has suffered liver failure, a Palestinian official said on Sunday as Arafat's subordinates decided in his absence to enforce a law and order plan in Palestinian areas.	1	arafat liver failure pm visit paris reuters yasser arafat critically ill paris hospital suffered liver failure palestinian official sunday arafat subordinates decided absence enforce law plan palestinian	1	0	1	4	4	0	6	6	0	4	0	11	4	0	7	3	4	10	3
Two Britons shot dead near death railway bridge (AFP)AFP - Two Britons were shot dead by unknown gunmen near the famous Bridge over the River Kwai in western Thailand, police said.	1	britons shot dead death railway bridge afp afp britons shot dead unknown gunmen famous bridge river kwai western thailand police	1	0	1	3	4	4	5	7	2	7	6	4	4	7	7	5	9	3	3
Mbeki #39;s deputy in fraud scandalIt has been dubbed Hamlet without the prince, a trial where the accused is absent but which could determine if he is to rule South Africa.	1	mbeki deputy fraud scandalit dubbed hamlet prince trial accused absent determine rule south africa	1	0	1	4	1	5	3	2	1	0	8	8	7	8	11	13	6	15	10
UN panel proposes sweeping changesUNITED NATIONS, New York The United Nations has proposed the most sweeping changes in its history, recommending the overhaul of its top decision-making group, the Security Council, and holding out the possibility that it could grant legitimacy to pre	1	panel proposes sweeping changesunited nations york united nations proposed sweeping history recommending overhaul top security council holding possibility grant legitimacy pre	1	0	1	4	1	0	6	6	0	4	0	11	5	0	0	9	13	7	4
Soweto township marks centenarySouth Africa's historic Soweto township marks its 100th birthday on Tuesday in a mood of optimism.	1	soweto township marks centenarysouth africa historic soweto township marks 100th birthday tuesday mood optimism	0	2	2	4	5	0	6	6	8	8	1	0	8	6	4	4	15	0	17
Florida Election Supervisors Back Reforms (AP)AP - Florida's 67 county elections supervisors proposed dramatic reforms, including replacing Election Day with 11 days of voting and doing away with voting precincts.	1	florida election supervisors reforms ap ap florida county elections supervisors proposed dramatic reforms including replacing election day days voting voting precincts	1	0	1	4	1	0	6	6	0	4	0	11	0	14	13	8	0	14	7
Israeli Forces Thrust Into Northern Gaza (Reuters)Reuters - Israeli forces thrust into the outskirts\of the Jabalya refugee camp in the northern Gaza Strip on\Thursday in what the military said was an effort to stop\Palestinians firing rockets into Israel.	1	israeli forces thrust northern gaza reuters reuters israeli forces thrust jabalya refugee camp northern gaza strip military effort firing rockets israel	1	0	1	3	4	4	5	7	2	7	6	4	4	7	7	3	4	10	3
Martin signals new flexibility to reach health deal with provinces (Canadian Press)Canadian Press - KELOWNA, B.C. (CP) - The federal government will seek a flexible medicare-reform agreement that could include individual deals with provinces, Prime Minister Paul Martin said Wednesday.	1	martin signals flexibility reach health deal provinces canadian press canadian press kelowna cp federal government seek flexible agreement individual deals provinces prime minister paul martin wednesday	1	0	1	4	1	0	6	6	0	4	0	11	0	14	11	13	8	16	10
Ex-envoys: Mideast peace breakthrough possibleJERUSALEM -- Former US envoys say that the passing of Yasser Arafat would open up new opportunities for Mideast peace, especially if new, pragmatic Palestinian leaders emerge.	1	mideast peace breakthrough possiblejerusalem envoys passing yasser arafat opportunities mideast peace pragmatic palestinian leaders emerge	1	0	1	4	1	0	6	6	0	4	0	11	5	0	0	3	4	10	4
Cheney Campaigns for House Candidates (AP)AP - With two Louisiana congressional seats still up for grabs, Vice President Dick Cheney campaigned in the state Wednesday on behalf of Republicans who hope to sweep Saturday's runoff elections.	1	cheney campaigns house candidates ap ap louisiana congressional seats grabs vice president dick cheney campaigned wednesday behalf republicans hope sweep saturday runoff elections	1	0	1	4	1	0	6	6	0	4	0	11	0	14	13	8	0	14	7
France Mulls Hostage Crisis, Confusion Over Ransom DUBAI/PARIS (Reuters) - The French government held crisis talks on the fate of two French journalists held hostage in Iraq Wednesday amid growing uncertainty over whether their kidnappers had demanded a ransom and two-day deadline.	1	france mulls hostage crisis confusion ransom reuters french government held crisis talks fate french journalists held hostage iraq wednesday amid growing uncertainty kidnappers demanded ransom deadline	1	0	1	3	4	4	5	7	2	7	8	5	12	0	9	15	6	15	8
Turkey eyes \$15 billion investment yearsANKARA: Turkey is hoping to attract \$15 billion of foreign investment between 2005 and 2007 through reforms designed to overhaul its economy and ease the country #39;s entry into	1	turkey eyes billion investment yearsankara turkey hoping attract billion foreign investment reforms designed overhaul economy ease country entry	0	1	3	4	1	0	6	6	0	4	0	11	5	0	0	9	13	7	4
Mozambicans Vote for New PresidentMozambique #39;s poor, many carrying small children, trudged along narrow dirt roads in oppressive heat Wednesday to pick a replacement for the president who has ruled	1	mozambicans vote presidentmozambique poor carrying children trudged narrow dirt roads oppressive heat wednesday pick replacement president ruled	1	0	1	4	1	0	6	6	0	4	0	11	0	14	13	8	0	14	7
Japan loses whale trade bidA UN meeting has harpooned a Japanese bid to ease curbs on trade in whale products, but a defiant Tokyo accused the West of quot;cultural imperialism quot; and vowed to press efforts to expand whaling.	1	japan loses whale trade bida meeting harpooned japanese bid ease curbs trade whale products defiant tokyo accused west quot cultural imperialism quot vowed press efforts expand whaling	1	0	1	4	1	0	6	6	0	4	0	11	5	0	0	9	13	7	4
Stocks Drop After Greenspan TestimonyNEW YORK - Investors were unmoved by Federal Reserve Chairman Alan Greenspan's improved assessment of the economy, with stocks falling narrowly Wednesday in light trading. While Greenspan said the economy has "regained some traction" after the summer's slowdown, he echoed Wall Street's concerns over energy prices, which have fallen from record highs in recent …	1	stocks drop greenspan testimonynew york investors unmoved federal reserve chairman alan greenspan improved assessment economy stocks falling narrowly wednesday light trading greenspan economy regained traction summer slowdown echoed wall street concerns energy prices fallen record highs weeks stubbornly remain barrel	0	1	3	2	0	6	4	8	9	10	11	12	11	3	6	16	17	18	12
Iran ready to test Shahab-3 missile again: defense ministerTEHRAN (IRNA) -- Defense Minister Ali Shamkhani stressed that Iran #39;s recent test of the Shahab-3 missile was successful, saying his ministry is ready to test it again #39;in the presence of observers #39;.	1	iran ready test missile defense ministertehran irna defense minister ali shamkhani stressed iran test missile successful ministry ready test presence observers	1	0	1	4	1	0	6	6	0	4	0	11	5	0	0	9	13	7	4
In Wake of Attacks, State of Emergency Declared in IraqThe Iraqi government declared a state of emergency for 60 days as U.S. and Iraqi forces prepared for an expected assault on rebels in Fallujah.	1	wake attacks emergency declared iraqthe iraqi government declared emergency days iraqi forces prepared expected assault rebels fallujah	1	0	1	3	4	4	5	7	2	7	6	4	12	7	10	15	9	17	8
Iraqi Interim Government Declares Martial Law BAGHDAD (Reuters) - Iraq's interim government declared a state of emergency for 60 days on Sunday to quell violence gripping the country ahead of January elections.	1	iraqi interim government declares martial law baghdad reuters iraq interim government declared emergency days sunday quell violence gripping country ahead january elections	1	0	1	3	4	0	6	6	0	4	0	11	12	7	10	15	0	17	8
Nobel Peace Prize winner gives some credit to Kansas Catholic &lt;b&gt;...&lt;/b&gt;ATCHISON, Kan. (CNS) -- The 2004 winner of the Nobel Peace Prize says a small Catholic college in Kansas was instrumental in making her quot;who I am and may ever become, quot; according to correspondence released by the school.	1	nobel peace prize winner credit kansas catholic lt gt lt gt atchison cns winner nobel peace prize catholic college kansas instrumental quot quot correspondence released school	0	2	2	4	5	0	6	6	0	4	0	11	5	0	0	9	13	7	4
Royal Wedding Lures International Media To BruneiBandar Seri Begawan - Bruneis Royal Wedding between His Royal Highness the Crown Prince Haji Al-Mutahdee Billah and Yang Mulia Dayangku Sarah binti Pengiran Salleh Ab Rahaman has attracted some 170 foreign journalists to the Sultanate.	1	royal wedding lures international media bruneibandar seri begawan bruneis royal wedding royal highness crown prince haji billah yang mulia dayangku sarah binti pengiran salleh ab rahaman attracted foreign journalists sultanate	1	0	1	4	1	5	0	0	1	0	8	5	12	0	9	13	6	15	19
Hezbollah plane flies over IsraelLebanon #39;s guerrilla organization Hezbollah announced Sunday it hd flown an unmanned reconnaissance plane over northern Israel for the first time.	1	hezbollah plane flies israellebanon guerrilla organization hezbollah announced sunday hd flown unmanned reconnaissance plane northern israel time	1	0	1	3	5	4	5	7	8	8	1	0	8	6	4	3	15	10	17
SKorea's Samsung to invest 24 billion dollars in new chip lines (AFP)AFP - South Korea's Samsung Electronics Co., the world's largest memory chipmaker, said it would invest some 24 billion dollars in building new chip production lines over the next six years.	1	skorea samsung invest billion dollars chip lines afp afp south korea samsung electronics largest memory chipmaker invest billion dollars building chip production lines	0	1	0	1	3	3	0	0	6	9	7	9	6	13	5	7	14	8	14
German leader to arrive in ChinaGerman Chancellor Gerhard Schroeder was preparing Sunday to arrive in China for the start of a five day Asian tour Monday to discuss trade and bilateral ties.	1	german leader arrive chinagerman chancellor gerhard schroeder preparing sunday arrive china start day asian tour monday trade bilateral ties	1	0	1	4	1	0	6	6	0	4	0	11	5	0	0	9	13	7	4
Pakistan Test-Fires Nuclear MissilePakistan has successfully test fired a medium-range, nuclear-capable missile that could hit most cities in neighbouring India. Defence officials said the exercise was not intended as a message to the South Asian rival.	1	pakistan nuclear missilepakistan test fired missile hit cities neighbouring india defence officials exercise intended message south asian rival	1	0	1	4	1	0	6	6	0	4	0	11	5	0	0	9	13	7	4
Zimbabwe will not invite imperialists to observe elections &lt;b&gt;...&lt;/b&gt;HARARE - The Zimbabwe government will not invite imperialist countries to observe its elections due to be held in March next year, a Saturday newspaper quoted President Robert Mugabe as saying.	1	zimbabwe invite imperialists observe elections lt gt lt gt harare zimbabwe government invite imperialist countries observe elections held march saturday newspaper quoted president robert mugabe	1	0	1	4	1	0	6	6	0	4	0	11	0	0	13	8	6	14	0
U.S. Says New Images Show Iran Plans Nuclear Bomb VIENNA (Reuters) - A senior U.S. official said on Thursday that satellite photographs of a suspected nuclear industrial site in Iran demonstrated its intention to develop atomic weapons, an allegation Tehran dismissed as "a new lie."	1	images iran plans nuclear bomb vienna reuters senior official thursday satellite photographs suspected nuclear industrial site iran demonstrated intention develop atomic weapons allegation tehran dismissed lie	1	0	1	4	1	0	6	6	0	4	0	11	5	0	0	9	13	7	4
Detainees seen as minimal threatWASHINGTON -- Most of the alleged Al Qaeda and Taliban inmates at the US military prison at Guantanamo Bay, Cuba, are likely to be freed or sent to their home countries for further investigation because many pose little threat and are not providing much valuable intelligence, the facility's deputy commander has said.	1	detainees minimal threatwashington alleged al qaeda taliban inmates military prison guantanamo bay cuba freed countries investigation pose threat providing valuable intelligence facility deputy commander	1	0	1	3	4	4	3	2	2	7	8	5	12	8	9	13	6	15	10
A Bit of Wall St. on the TigrisThe 150 brokers and traders on the Iraq Stock Exchange are not waiting for the war to end, buying and selling orders a few hundred yards away from the fighting.	1	bit wall tigristhe brokers traders iraq stock exchange waiting war buying selling yards fighting	0	1	3	2	0	6	4	8	9	10	11	12	11	3	10	15	17	17	8
Powell accuses Iran of trying to develop nuclear missilesThe Bush administration yesterday accused Iran of attempting to develop missiles with nuclear warheads - a charge that could derail the European arms-control agreement struck earlier this week.	1	powell accuses iran develop nuclear missilesthe bush administration yesterday accused iran attempting develop missiles nuclear warheads charge derail european agreement struck earlier week	1	0	1	4	1	0	6	6	0	4	0	11	5	0	0	9	13	7	4
Nova Scotia becomes sixth province, territory to allow same-sex marriages (Canadian Press)Canadian Press - HALIFAX (CP) - Nova Scotia became the sixth province or territory to allow same-sex marriages when the province's Supreme Court ruled Friday that banning such unions is unconstitutional.	1	nova scotia sixth province territory marriages canadian press canadian press halifax cp nova scotia sixth province territory marriages province supreme court ruled friday banning unions unconstitutional	1	0	1	4	1	0	3	2	1	0	0	8	7	8	11	13	0	3	10
Witnesses to Confront Cali Cartel KingpinThirteen years into their probe, U.S. investigators have assembled a team of smugglers, accountants and associates to testify against Colombian cartel kingpin Gilberto Rodriguez Orejuela.	1	witnesses confront cali cartel kingpinthirteen probe investigators assembled team smugglers accountants associates testify colombian cartel kingpin gilberto rodriguez orejuela	1	0	1	0	4	5	3	2	1	0	10	8	7	8	11	13	15	16	10
Bush Confronts New Challenge on Issue of IranWhile assembling a new national security team, President Bush is confronting what could become the biggest challenge of his second term: how to contain Iran #39;s	1	bush confronts challenge issue iranwhile assembling national security team president bush confronting biggest challenge term iran	1	0	1	4	1	0	6	6	0	4	0	11	0	14	13	8	0	14	7
UN Refugee Chief Backs Autonomy for Sudan #39;s Darfur RegionThe United Nations High Commissioner for Refugees says granting more autonomy to southern Sudan could help end the bloody conflict there.	1	refugee chief autonomy sudan darfur regionthe united nations commissioner refugees granting autonomy southern sudan bloody conflict	1	0	1	3	4	0	6	6	0	4	0	11	5	0	0	9	13	7	4
Iran leader reasserts arms viewsNEW YORK Iran #39;s foreign minister has said that his country will never give up its right to develop nuclear technology for peaceful use, though he denied any intent to produce nuclear weapons.	1	iran leader reasserts arms viewsnew york iran foreign minister country develop nuclear technology peaceful denied intent produce nuclear weapons	1	0	1	4	1	0	6	6	0	4	0	11	5	0	0	9	13	7	4
India launches rural aid projectIndia launches a \$445m food-for-work programme aimed at tackling hunger in poor rural areas.	1	india launches rural aid projectindia launches 445m programme aimed tackling hunger poor rural	1	1	0	4	1	0	6	6	0	4	0	11	5	0	0	9	13	7	4
Palestinian Attack Kills Woman in Gaza Settlement (Reuters)Reuters - A Palestinian mortar bomb slammed into a\house in a Jewish settlement in the Gaza Strip Friday, killing\a woman and fueling settler anger over Prime Minister Ariel\Sharon's plan to pull Israelis out of the area.	1	palestinian attack kills woman gaza settlement reuters reuters palestinian mortar bomb slammed jewish settlement gaza strip friday woman fueling settler anger prime minister plan pull israelis	1	0	1	3	4	4	5	7	2	7	6	4	4	7	7	3	4	10	3
3 Egyptian soldiers killed in Israeli errorJERUSALEM -- Israeli troops mistook three Egyptian police officers for Palestinian militants and shot them dead yesterday along the Gaza Strip's border with Egypt, increasing tensions between the neighbors.	1	egyptian soldiers killed israeli errorjerusalem israeli troops mistook egyptian police officers palestinian militants shot dead yesterday gaza strip border egypt increasing tensions neighbors	1	0	1	3	4	4	5	7	2	7	6	4	4	7	7	3	4	10	3
Thirteen people killed in power plant explosion in HebeiThirteen people were killed and one seriously injured in an explosion at a power plant in Wu #39;an City in north China #39;s Hebei Province when the plant began trialoperation on Thursday afternoon.	1	thirteen people killed power plant explosion hebeithirteen people killed injured explosion power plant wu city north china hebei province plant trialoperation thursday afternoon	1	0	1	3	4	4	5	7	2	7	6	4	4	7	7	5	9	3	3
In Taipei, Talk of Arms -- and AmityPremier Yu Shyi-Kun hopes economic ties to the mainland will guarantee peace. If not, quot;Taiwan has to have to ability to defend itself quot;.	1	taipei talk arms amitypremier yu hopes economic ties mainland guarantee peace quot taiwan ability defend quot	1	0	1	4	1	0	6	6	0	4	0	11	5	0	0	9	13	7	4
UK to Host Mideast Conference: ReportLONDON , December 6 (IslamOnline.net amp; News Agencies) - Britain received a green light from Washington to host a conference on Middle East peace after the Palestinian presidential elections, a British news paper reported Monday, December 6.	1	uk host mideast conference reportlondon december amp news agencies britain received green light washington host conference middle east peace palestinian presidential elections british news paper reported monday december	1	0	1	4	1	0	6	6	0	4	0	11	5	0	0	3	4	10	4
80 Killed in U.S. Offensive in IraqSAMARRA, Iraq - U.S. and Iraqi forces launched a major assault Friday to regain control of the insurgent stronghold of Samarra, and hospital officials said at least 80 people were killed and 100 wounded...	1	killed offensive iraqsamarra iraq iraqi forces launched major assault friday regain control insurgent stronghold samarra hospital officials people killed wounded	1	0	1	3	4	4	5	7	2	7	6	4	4	7	7	5	9	3	3
Bombs kill 35 children in IraqThree bombs exploded at a neighborhood celebration today in western Baghdad, killing 35 children and seven adults, officials said.	1	bombs kill children iraqthree bombs exploded neighborhood celebration western baghdad killing children adults officials	1	0	1	3	4	4	5	7	2	7	6	4	4	7	7	5	9	3	3
NOBEL LAUREATE TO CONVEY CHEN #39;S GOODWILL TO BEIJING LEADER AT APECTaipei, Nov. 12 (CNA) Academia Sinica President Lee Yuan-tseh said Friday he will convey President Chen Shui-bian #39;s goodwill to mainland Chinese President Hu Jintao at the upcoming informal leadership meeting	1	nobel laureate convey chen goodwill beijing leader apectaipei cna academia sinica president lee friday convey president chen goodwill mainland chinese president hu jintao upcoming informal leadership meeting	1	0	1	4	1	0	6	6	0	4	0	11	5	0	0	9	13	7	4
Football: Brazil legend's UK debutBrazil football great Socrates is set to make his debut for non-league Garforth Town on Saturday.	1	football brazil legend uk debutbrazil football socrates set debut garforth town saturday	0	2	2	0	2	1	2	1	3	2	4	1	10	12	2	2	16	4	15
Dogs said to smell cancer signs LONDON -- It has long been suspected that man's best friend has a special ability to sense when something is wrong with us. Now, the first experiment to verify that scientifically has demonstrated that dogs are able to smell cancer.	1	dogs smell cancer signs london suspected friend special ability sense wrong experiment verify scientifically demonstrated dogs smell cancer	1	0	1	4	5	0	3	2	8	8	1	0	0	2	9	10	10	13	16
In Mexico visit, enmity greets Harvard scholar MEXICO CITY -- Ever since the release earlier this year of his book quot;Who are We?: The Challenges to America's National Identity, quot; which argues that Mexican immigrants pose a threat to American culture, Samuel P. Huntington has been the US academic Mexicans love to hate.	1	mexico visit enmity greets harvard scholar mexico city release earlier book quot challenges america national identity quot argues mexican immigrants pose threat american culture samuel huntington academic mexicans love hate	1	0	1	3	5	4	3	2	8	8	1	0	8	2	14	6	12	13	13
Palestinians kill three Israeli soldiersPalestinian fighters sneaked onto an Israeli military post at a small Jewish settlement in the Gaza Strip early yesterday under cover of darkness and a thick morning fog	1	palestinians kill israeli soldierspalestinian fighters sneaked israeli military post jewish settlement gaza strip yesterday cover darkness thick morning fog	1	0	1	3	4	4	5	7	2	7	6	4	4	7	7	3	4	10	3
Bush, Kerry Differ on Approach to North Korea SEOUL (Reuters) - The determination of North Korea to develop nuclear arms could harden after President Bush and his rival, Senator John Kerry, clashed over how to proceed with six-party talks on Pyongyang's ambitions, analysts said.	1	bush kerry approach north korea seoul reuters determination north korea develop nuclear arms harden president bush rival senator john kerry clashed proceed talks pyongyang ambitions analysts	1	0	1	4	1	0	6	6	0	4	0	11	5	0	0	9	13	7	4
Football: Spanish FA apologisesThe Spanish FA apologises to its English counterparts following racist chanting.	1	football spanish fa apologisesthe spanish fa apologises english counterparts racist chanting	0	2	2	0	2	1	2	1	3	2	4	1	10	12	2	2	16	4	15
Feed-Tube Law Is Struck Down in Florida CaseThe court said that Gov. Jeb Bush violated separation of powers when he signed a law to keep Theresa Schiavo alive.	1	law struck florida casethe court gov jeb bush violated separation powers signed law theresa schiavo alive	1	0	1	4	1	5	3	2	1	0	10	8	0	8	13	8	0	14	7
Indonesia police identify embassy attackerIndonesian police on Friday identified the man they suspect was the suicide bomber in an attack on the Australian Embassy in Jakarta last month, and said the 30	1	indonesia police identify embassy attackerindonesian police friday identified suspect suicide bomber attack australian embassy jakarta month	1	0	1	3	4	4	5	7	2	7	6	4	4	7	7	5	9	3	3
A conspiracy theory : In the aftermath of Arafats passingAH Jaffor Ullah. Yasser Arafat, the acknowledged leader of Palestinian people, lived amidst controversy all through his life. The cause of his death has now become a source of controversy amongst the departed leaders people all over Middle East.	1	conspiracy theory aftermath arafats passingah jaffor ullah yasser arafat acknowledged leader palestinian people lived amidst controversy life death source controversy departed leaders people middle east	1	0	1	3	4	0	6	6	0	4	0	11	4	7	7	3	4	10	3
In Indonesia, Businesses Hopeful After ElectionAfter suffering through two shambling administrations, Indonesia appears to have a new president who many of its business leaders say they believe will uproot corruption and revive investment.	1	indonesia businesses hopeful electionafter suffering shambling administrations indonesia appears president business leaders uproot corruption revive investment	1	0	1	4	1	0	6	6	0	4	0	11	0	14	13	8	0	14	7
Vladimir Putin: Claims of authoritarian drift quot;total nonsense quot;President Vladimir Putin rejected concern that he is beating a path toward authoritarianism, calling such criticism quot;total nonsense quot; in an interview published Friday and saying Russia needs time to build democracy after centuries of heavy	1	vladimir putin claims authoritarian drift quot total nonsense quot president vladimir putin rejected concern beating path authoritarianism calling criticism quot total nonsense quot interview published friday russia time build democracy centuries heavy	1	0	1	4	1	0	6	6	0	4	0	11	5	0	0	9	13	7	4
Wen calls for better leadership from partyBEIJING - Chinese Premier Wen Jiabao yesterday pledged to improve the leadership of the Communist Party at a time when its popularity is waning.	1	wen calls leadership partybeijing chinese premier wen jiabao yesterday pledged improve leadership communist party time popularity waning	1	0	1	4	1	0	6	6	0	4	0	11	0	14	13	8	0	7	4
France, Ivory Coast relations worsenNine French peacekeepers were killed during an air raid by Ivorian bombers more than a week ago. France responded by destroying most of the Ivorian air force.	1	france ivory coast relations worsennine french peacekeepers killed air raid ivorian bombers week ago france responded destroying ivorian air force	1	0	1	3	4	4	5	7	2	7	6	4	4	0	0	5	9	7	3
B.C. Mountie killed in stolen truck crash leaves wife, two small children (Canadian Press)Canadian Press - VERNON, B.C. (CP) - Vernon RCMP have identified the auxiliary officer killed when the cruiser in which he was riding was struck by a stolen truck as Glen Evely, 39.	1	mountie killed stolen truck crash leaves wife children canadian press canadian press vernon cp vernon rcmp identified auxiliary officer killed cruiser riding struck stolen truck glen evely	1	0	1	3	4	4	5	7	2	7	6	4	4	7	7	5	9	3	3
BA flight makes emergency landing in Amsterdam, escorted by F-16 &lt;b&gt;...&lt;/b&gt;A British Airways passenger plane flying from Berlin to London reported an unspecified security threat and made an emergency landing in Amsterdam on Thursday, escorted by two Dutch F-16 jet fighters, the airline said.	1	ba flight emergency landing amsterdam escorted lt gt lt gt british airways passenger plane flying berlin london reported unspecified security threat emergency landing amsterdam thursday escorted dutch jet fighters airline	1	0	3	3	5	4	0	0	8	8	1	7	8	6	4	4	15	11	18
China admits it #39;s worried over stalled N.Korean nuclear talksChina admitted Tuesday it was worried about the apparent stalling of six-party talks about North Korea #39;s nuclear weapons program and blamed the lack of trust between Pyongyang and Washington.	1	china admits worried stalled nuclear talkschina admitted tuesday worried apparent stalling talks north korea nuclear weapons program blamed lack trust pyongyang washington	1	0	1	4	1	0	6	6	0	4	0	11	5	0	0	9	13	7	4
Dow Jones Agrees to Buy MarketWatch in \$519 Million DealDow Jones Company, the publisher of The Wall Street Journal, has agreed to buy MarketWatch, the parent company of the financial news Web site CBS MarketWatch, for approximately \$519 million, the companies said today.	1	dow jones agrees buy marketwatch dealdow jones company publisher wall street journal agreed buy marketwatch parent company financial news web site cbs marketwatch companies	0	1	3	2	0	5	0	0	1	0	10	7	3	10	15	0	8	16	19
Bush, Kerry Economic Budgets Exceed \$1TWASHINGTON - President Bush and Democratic Sen. John Kerry have starkly different economic priorities with a common thread: price tags exceeding \$1 trillion that could pump already huge deficits skyward over the next decade...	1	bush kerry economic budgets exceed 1twashington president bush democratic john kerry starkly economic priorities common thread price tags exceeding trillion pump huge deficits skyward decade	1	1	3	4	1	0	6	6	0	4	0	11	0	14	13	8	0	14	7
UN Refugee Chief Tours Sudanese Refugee Camp in ChadThe top United Nation refugee official is in Chad, where Saturday, he toured a camp for Sudanese refugees who have fled violence in the western Darfur region.	1	refugee chief tours sudanese refugee camp chadthe top united nation refugee official chad saturday toured camp sudanese refugees fled violence western darfur region	1	0	1	3	4	4	5	7	2	7	6	4	5	0	0	9	13	7	4
Thailand Tackles Bird Flu EpidemicBANGKOK, Thailand Sept. 30, 2004 - Millions of volunteers led by emergency teams fanned out across Thailand on Thursday in a new drive to fight bird flu after the prime minister gave officials 30 days to eradicate the epidemic.	1	thailand tackles bird flu epidemicbangkok thailand millions volunteers led emergency teams fanned thailand thursday drive fight bird flu prime minister officials days eradicate epidemic	1	0	1	3	4	0	6	6	0	4	0	4	4	7	7	5	9	3	3
Fighting spreads in Sunni TriangleFierce battles between insurgents and US and Iraqi forces killed at least 27 people today in Baqouba and south of Baghdad as US forces move against the last remaining pockets of resistance in Fallujah.	1	fighting spreads sunni trianglefierce battles insurgents iraqi forces killed people baqouba south baghdad forces move remaining pockets resistance fallujah	1	0	1	3	4	4	5	7	2	7	6	4	12	7	10	15	9	17	8
Israel Destroys Refugee Homes, Kills OneGAZA CITY, Gaza Strip - A day after a mortar round killed an Israeli-American woman in a nearby settlement, the Israeli army charged into a Palestinian refugee camp Saturday, killing one person and tearing down 35 homes, witnesses and a U.N. aid official said...	1	israel destroys refugee homes kills onegaza city gaza strip day mortar round killed woman nearby settlement israeli army charged palestinian refugee camp saturday killing person tearing homes witnesses aid official	1	0	1	3	4	4	5	7	2	7	6	4	4	7	7	3	4	10	3
Multiple Bombings Kill At Least 37 In Capital_ At least three bombs exploded near a US convoy in western Baghdad on Thursday, killing 37 people and wounding more than 50, officials said.	1	multiple bombings kill bombs exploded convoy western baghdad thursday killing people wounding officials	1	0	1	3	4	4	5	7	2	7	6	4	4	7	7	5	9	3	3
Musharraf meets Pope John PaulPakistan President General Pervez Musharraf met Pope John Paul II, who urged him to adopt a quot;spirit of dialogue and tolerance quot; in his region.	1	musharraf meets pope john paulpakistan president pervez musharraf met pope john paul ii urged adopt quot spirit dialogue tolerance quot region	1	0	1	4	1	0	6	6	0	4	0	11	5	0	0	9	13	7	4
Gurkhas win citizenship fightThe Gurkhas who have served in the British Army have won an historic fight to be allowed to apply for British citizenship. The decision comes after a lengthy fight by the Nepalese soldiers for the right to	1	gurkhas win citizenship fightthe gurkhas served british army won historic fight allowed apply british citizenship decision lengthy fight nepalese soldiers	1	0	1	4	4	4	6	7	2	7	8	5	12	14	9	15	6	14	7
Pakistan and India agree to cooperate on easing tensions and &lt;b&gt;...&lt;/b&gt;The leaders of India and Pakistan promised Friday to work together to quot;restore normalcy and cooperation quot; between their countries and seek peace in the disputed Himalayan territory of Kashmir.	1	pakistan india agree cooperate easing tensions lt gt lt gt leaders india pakistan promised friday quot restore normalcy cooperation quot countries seek peace disputed himalayan territory kashmir	1	0	1	4	1	0	6	6	0	4	0	11	5	0	0	9	13	7	4
Footage Shows 10 New Hostages in IraqBAGHDAD, Iraq - The Arab news network Al-Jazeera showed video Thursday of 10 new hostages seized in Iraq by militants. Al-Jazeera said the 10 - six Iraqis, two Lebanese and two Indonesian women - were taken by The Islamic Army in Iraq...	1	footage hostages iraqbaghdad iraq arab news network video thursday hostages seized iraq militants iraqis lebanese indonesian women islamic army iraq	1	0	1	3	4	4	5	7	2	7	8	5	12	7	9	15	6	17	8
Iran agrees to nuclear enrichment freeze -diplomatsIran has agreed to suspend its uranium enrichment programme in an attempt to ease concerns that its nuclear programme is aimed at developing weapons, a Western diplomat close to the United Nations said today.	1	iran agrees nuclear enrichment freeze agreed suspend uranium enrichment programme attempt ease concerns nuclear programme aimed developing weapons western diplomat close united nations	1	0	1	4	1	0	6	6	0	4	0	11	5	0	0	9	13	7	4
What Do Women Want in a Presidential Candidate? (Reuters)Reuters - Tammy Hough is a life-long\Republican, a socially conservative stay-at-home mother and a\woman who puts American security as a top priority, so many\pundits see her vote as an easy one for President Bush. But\she's not so sure.	1	women presidential candidate reuters reuters tammy hough socially conservative mother american security top priority vote easy president bush	1	0	1	4	1	0	6	6	0	4	0	11	0	14	13	8	0	14	7
Tough Talks Ahead After EU Is CriticizedEfforts to forge the world's largest free trade zone between the European Union and South America's Mercosur economic bloc are unlikely to be concluded by an Oct. 31 deadline, the EU said Thursday, with both sides declaring each other's trade offers insufficient.	1	tough talks ahead eu criticizedefforts forge largest free trade zone european union south america mercosur economic bloc concluded deadline eu thursday declaring trade offers insufficient	1	0	3	4	1	0	6	6	0	4	0	11	5	0	0	9	13	7	4
Israel Apologizes for Killing Egyptian OfficersThe Israeli prime minister, Ariel Sharon, apologized to Egypt today after an Israeli army tank crew fired on an Egyptian patrol near the border with Gaza, killing three Egyptian police officers.	1	israel apologizes killing egyptian officersthe israeli prime minister ariel sharon apologized egypt israeli army tank crew fired egyptian patrol border gaza killing egyptian police officers	1	0	1	3	4	4	5	7	2	7	6	4	4	7	7	3	4	10	3
Dodgers Nip Giants 3-2 in Crucial SeriesSAN FRANCISCO - Shawn Green can sit out Saturday knowing he was a huge help to the Dodgers during their crucial series against San Francisco. Green hit a two-run homer in Los Angeles' 3-2 victory over the Giants on Friday night, a day before the first baseman will miss a game to observe the Jewish holiday Yom Kippur...	1	dodgers nip giants crucial seriessan francisco shawn green sit saturday knowing huge dodgers crucial series san francisco green hit homer los angeles victory giants friday night day baseman game observe jewish holiday yom kippur	0	2	2	0	2	2	1	5	5	3	3	3	9	4	8	11	3	9	2
Iran says it will stop enriching uraniumWASHINGTON -- Iran pledged yesterday to temporarily suspend its uranium enrichment program in an attempt to ease suspicions that it is trying to develop nuclear weapons. The move could defuse a longstanding showdown with the United States over Iran's nuclear activities, diplomats said.	1	iran enriching uraniumwashington iran pledged yesterday temporarily suspend uranium enrichment program attempt ease suspicions develop nuclear weapons move defuse longstanding showdown united iran nuclear activities diplomats	1	0	1	4	1	0	6	6	0	4	0	11	5	0	0	9	13	7	4
23 Palestinians, 3 Israelis Die in Gaza Fighting JABALYA, Gaza (Reuters) - Twenty-three Palestinians and three Israelis were killed Thursday, Gaza's bloodiest day for more than two years, as Israel's army struck back after a rocket attack killed two Israeli children in a border town.	1	palestinians israelis die gaza fighting jabalya gaza reuters palestinians israelis killed thursday gaza bloodiest day israel army struck rocket attack killed israeli children border town	1	0	1	3	4	4	5	7	2	7	6	4	4	7	7	3	4	10	3
Sudan 'foils Islamist coup plot'Sudan says it has foiled a coup plot by backers of detained Islamist leader, Hassan al-Turabi.	1	sudan islamist coup foiled coup plot backers detained islamist leader hassan	1	0	1	3	4	4	5	7	2	7	8	5	12	8	9	13	6	15	10
Seoul says firms shipped lethal chemical to DPRKSEOUL: South Korean authorities stopped a shipment of a potentially lethal chemical to North Korea this year, but at least two other shipments got through to the communist state, South Korea said on Friday.	1	seoul firms shipped lethal chemical dprkseoul south korean authorities stopped shipment lethal chemical north korea shipments communist south korea friday	1	0	1	4	5	0	6	6	0	4	0	11	5	0	0	9	13	7	4
Scientist Ramanna mournedBOMBAY: Raja Ramanna, the scientist who pioneered India #39;s drive to become a nuclear power, died yesterday in Bombay at age 79.	1	scientist ramanna mournedbombay raja ramanna scientist pioneered india drive nuclear power died yesterday bombay age	1	0	1	4	5	0	6	6	8	8	1	0	5	2	0	10	10	7	16
POLITICAL POINTS 1:27 PM Sorry Is the Hardest WordIt did not go unnoticed among the press corps traveling with President Bush that British Prime Minister Tony Blair apologized this week to fellow Labor Party officials for the fact that, as it	1	political pm hardest wordit unnoticed press corps traveling president bush british prime minister tony blair apologized week fellow labor party officials	1	0	1	4	1	0	6	6	0	4	0	11	0	14	13	8	0	14	7
Prince Charles chastised for quot;old fashioned quot; viewsA minister has launched a scathing attack on heir to the throne Prince Charles, accusing him of being quot;very old fashioned quot; and out of touch in his views on teaching in schools.	1	prince charles chastised quot fashioned quot viewsa minister launched scathing attack heir throne prince charles accusing quot fashioned quot touch views teaching schools	1	0	1	4	1	5	3	2	1	0	8	8	7	8	14	6	12	13	13
Bush, Kerry brace for key presidential debate (AFP)AFP - The US presidential candidates were set to go head to head in a bruising, high-stakes televised debate, with Republican incumbent George W. Bush aiming to lock in his lead in the race and Democratic challenger John Kerry banking on a comeback.	1	bush kerry brace key presidential debate afp afp presidential candidates set head head bruising televised debate republican incumbent george bush aiming lock lead race democratic challenger john kerry banking comeback	1	0	1	4	1	0	6	6	0	4	0	11	0	14	13	8	0	14	7
Strong Quake Injures Six in Colombia BOGOTA, Colombia (Reuters) - Six people were hurt and two hospitals evacuated after a strong earthquake shook a large part of western Colombia on Monday, the government said.	1	strong quake injures colombia bogota colombia reuters people hurt hospitals evacuated strong earthquake shook western colombia monday government	1	0	1	3	4	4	5	7	2	7	6	4	4	7	7	5	9	3	3
Ivory Coast arms embargo backedABIDJAN, Ivory Coast -- African leaders backed an arms embargo and other immediate UN sanctions against Ivory Coast yesterday, isolating President Laurent Gbagbo's hard-line government even further in its deadly confrontation with its former colonial ruler, France.	1	ivory coast arms embargo backedabidjan ivory coast african leaders arms embargo sanctions ivory coast yesterday isolating president laurent gbagbo government deadly confrontation colonial ruler france	1	0	1	3	4	0	6	6	0	4	0	11	5	0	0	9	13	7	4
Calif. OKs World's Toughest Smog RulesLOS ANGELES - California air regulators Friday unanimously approved the world's most stringent rules to reduce auto emissions that contribute to global warming - a move that could affect car and truck buyers from coast to coast. Under the regulations, the auto industry must cut exhaust from cars and light trucks by 25 percent and from larger trucks and sport …	1	oks toughest smog ruleslos angeles california air regulators friday unanimously approved stringent rules reduce auto emissions contribute global warming move affect car truck buyers coast coast regulations auto industry cut exhaust cars light trucks percent larger trucks sport utility vehicles percent	0	1	3	2	5	5	0	0	8	0	10	7	3	10	15	0	8	11	18
Police Chief Backs Using Force Against IntrudersBritains top police officer today called for an urgent updating of the law to protect householders who use force to defend their homes against criminals - even if it involves killing the intruder.	1	police chief force intrudersbritains top police officer called urgent updating law protect householders force defend homes criminals involves killing intruder	1	0	1	3	4	4	5	7	2	7	6	4	4	7	7	5	9	3	3
Bereft Indian pilots leaving Andamans are saluted by air force (AFP)AFP - The Indian air force saluted pilots who rescued hundreds on the remote Nicobar islands despite losing family and colleagues when their base was destroyed by last week's deadly tsunami.	1	bereft indian pilots leaving andamans saluted air force afp afp indian air force saluted pilots rescued hundreds remote nicobar islands losing family colleagues base destroyed week deadly tsunami	1	0	1	3	4	4	5	7	2	7	6	4	4	11	12	5	9	11	18
MEPS APPROVE REVAMPED COMMISSIONEnding three weeks of stalemate, European lawmakers have approved a new executive commission for the European Union. European MPs had refused to accept a new team of commissioners proposed by Commission President Jose Manuel Barroso.	1	meps approve revamped commissionending weeks stalemate european lawmakers approved executive commission european union european mps refused accept team commissioners proposed commission president jose manuel barroso	1	0	1	4	1	0	0	0	0	4	10	7	3	10	15	0	8	16	18
E. Guinea coup suspects say they were torturedEquatorial Guinea has told a court he and his comrades had been chained like animals and tortured into confessing. and hand-cuffs to plead their innocence on Thursday.	1	guinea coup suspects torturedequatorial guinea told court comrades chained animals tortured confessing plead innocence thursday	1	0	1	4	1	5	3	2	1	0	8	8	7	8	11	13	6	15	10
Palestinians to host Western diplomatsSponsors of an internationally backed Mideast peace plan will send their foreign ministers to the region next week in hopes of restarting Israeli-Palestinian talks in the wake of Yasser Arafat #39;s death.	1	palestinians host western diplomatssponsors internationally mideast peace plan send foreign ministers region week hopes restarting talks wake yasser arafat death	1	0	1	4	1	0	6	6	0	4	0	11	5	0	0	3	4	10	4
Baghdad Bombings Kill One US Soldier, Wound 13WASHINGTON, Sept. 30, 2004 -- A series of car bombings in Baghdad today killed one American soldier and wounded 13 others. The bombings also killed at least two Iraqi policemen and reportedly injured scores of other Iraqis.	1	baghdad bombings kill soldier wound 13washington series car bombings baghdad killed american soldier wounded bombings killed iraqi policemen reportedly injured scores iraqis	1	0	1	3	4	4	5	7	2	7	6	4	4	7	7	5	9	3	3
Abbas Escapes Gaza Shooting Unharmed (AP)AP - Mahmoud Abbas, the temporary successor to Yasser Arafat, escaped unharmed Sunday when militants firing assault rifles burst into a mourning tent for the deceased Palestinian leader, killing two security guards and wounding six other people.	1	abbas escapes gaza shooting unharmed ap ap mahmoud abbas temporary successor yasser arafat escaped unharmed sunday militants firing assault rifles burst mourning tent deceased palestinian leader killing security guards wounding people	1	0	1	3	4	4	5	7	2	7	6	4	4	7	7	3	4	10	3
Pakistan arrests key Al-Qaeda operative (AFP)AFP - Pakistani security forces have arrested a key Al-Qaeda operative wanted in connection with attacks on Christian targets and a failed bid to kill President Pervez Musharraf, an official said.	1	pakistan arrests key operative afp afp pakistani security forces arrested key operative connection attacks christian targets failed bid kill president pervez musharraf official	1	0	1	3	4	0	6	6	0	4	0	11	12	7	0	13	6	15	4
Bin Laden Deputy Purportedly Seeks Strikes (AP)AP - An audio tape purportedly released by Osama bin Laden's deputy calls for attacks on U.S. and British interests everywhere, according to a broadcast Friday by Al-Jazeera television.	1	bin laden deputy purportedly seeks strikes ap ap audio tape purportedly released osama bin laden deputy calls attacks british broadcast friday television	1	0	1	3	4	4	3	2	2	7	8	5	12	8	9	13	6	15	10
US welcomes Sudan #39;s acceptance of expanded AU mission in DarfurThe United States welcomed on Friday Sudanese official #39;s announcement to accept a larger AfricanUnion (AU) mission in the western region of Darfur and urged the speedy deployment of AU troops.	1	welcomes sudan acceptance expanded au mission darfurthe united welcomed friday sudanese official announcement accept larger africanunion au mission western region darfur urged speedy deployment au troops	1	0	1	3	4	0	6	6	0	4	0	11	5	0	0	9	13	7	4
African Troops Begin with Small Steps to Calm Darfur (Reuters)Reuters - The rebels emerge from the desert\haze like ghosts. First one, silhouetted atop a sand dune and\holding a grenade launcher, then a dozen more, their shadowy\figures appearing in unison.	1	african troops steps calm darfur reuters reuters rebels emerge ghosts silhouetted atop sand dune grenade launcher dozen appearing unison	1	0	1	3	4	4	5	7	2	7	6	4	5	0	0	9	13	7	4
Al-Jazeera man remanded in SpainA Spanish court remands Tayseer Alouni and eight others in custody ahead of their trial for suspected al-Qaeda links.	1	remanded spaina spanish court remands tayseer alouni custody ahead trial suspected links	1	0	1	4	1	5	3	2	1	0	8	8	7	8	11	13	6	15	10
Latham stands by Bali claims candidateFederal Labor leader Mark Latham has ruled out disendorsing Queensland Labor candidate Ivan Molloy, over comments about the Bali bombings.	1	latham stands bali claims candidatefederal labor leader mark latham ruled disendorsing queensland labor candidate ivan molloy comments bali bombings	1	0	1	4	1	4	6	6	0	4	0	11	0	14	13	8	0	14	7
Europe ; Serbia calls on UN to annul appointment of Kosovo PMHe (Haradinaj) is a war crimes suspect, and Serbian authorities will face numerous difficulties ... with such a person, Kostunica said.	1	europe serbia calls annul appointment kosovo pmhe haradinaj war crimes suspect serbian authorities numerous difficulties person kostunica	1	0	1	4	1	4	3	2	2	7	8	8	7	8	11	13	6	15	10
Safety Group Closely Echoes Rail IndustryDocuments show that the nation's most influential rail-safety group is tightly bound to the railroad industry.	1	safety closely echoes rail industrydocuments nation influential tightly bound railroad industry	0	1	3	4	5	5	3	2	8	8	1	8	7	2	4	10	10	13	16
Deal in Congress to Keep Tax Cuts, Widening DeficitRepublican and Democratic leaders agreed to extend \$150 billion worth of tax cuts sought by President Bush without trying to pay for them.	1	deal congress tax cuts widening deficitrepublican democratic leaders agreed extend billion worth tax cuts sought president bush pay	0	1	3	4	1	0	0	0	0	4	10	7	0	10	13	8	0	14	7
U.N. War Court Transfers First Case to Serbia BELGRADE (Reuters) - The U.N. war crimes prosecutor sent the first case to the Serbian judiciary Friday in a move that could warm ties between the Hague-based court and Belgrade.	1	war court transfers serbia belgrade reuters war crimes prosecutor serbian judiciary friday move warm ties court belgrade	1	0	1	4	1	5	3	2	1	0	8	8	7	8	11	13	6	15	10
Editorial: Sub incident shows China #39;s stripesAfter days of speculation and a chase by Japanese destroyers and a surveillance plane, it has finally been determined that the nuclear submarine that intruded into Japanese territorial water between Okinawa and Taiwan was Chinese.	1	editorial incident china stripesafter days speculation chase japanese destroyers surveillance plane finally determined nuclear submarine intruded japanese territorial water okinawa taiwan chinese	1	0	1	4	5	0	6	6	8	8	1	0	8	0	4	9	13	7	4
4 nations lobby jointly for permanent seatsUNITED NATIONS - Japan, Brazil, Germany and India formed a lobbying group to help one another get permanent seats on the United Nations Security Council and head off proposals that might work against them.	1	nations lobby jointly permanent seatsunited nations japan brazil germany india formed lobbying permanent seats united nations security council head proposals	1	0	1	4	1	0	6	6	0	4	0	11	5	0	0	9	13	7	4
Job-Loss Panic Rises in Western Europe (AP)AP - Stephane Zervos first suspected his job was threatened when his bosses removed most of the heavy equipment from the car wheel factory where he'd worked for 24 years.	1	panic rises western europe ap ap stephane zervos suspected job threatened bosses removed heavy equipment car wheel factory	1	0	1	3	4	4	5	7	2	7	11	5	11	7	6	5	5	8	12
Russias strange bedfellowsMinisters from the Commonwealth of Independent States (CIS) gathered in the Ukrainian capital Kiev on September 29 to formulate a common anti-terrorism strategy.	1	russias strange bedfellowsministers commonwealth independent cis gathered ukrainian capital kiev september formulate common strategy	1	0	1	4	1	0	0	6	0	6	5	6	0	14	13	8	0	14	7
Bangkok animal trade talks openThe rules controlling the trade in many at-risk wildlife species may change at a Bangkok meeting starting on Saturday. The 166 member states of the Convention on International Trade in Endangered Species of	1	bangkok animal trade talks openthe rules controlling trade wildlife species change bangkok meeting starting saturday convention international trade endangered species	1	0	1	4	1	0	6	6	0	4	0	11	5	0	0	9	13	7	4
Israel Kills Two Militants During Massive Gaza Raid GAZA (Reuters) - The Israeli army killed two militants Saturday in an air strike in the northern Gaza Strip, bringing the number of Palestinians Israel has killed in one of its deadliest Gaza raids to 39.	1	israel kills militants massive gaza raid gaza reuters israeli army killed militants saturday air strike northern gaza strip bringing palestinians israel killed deadliest gaza raids	1	0	1	3	4	4	5	7	2	7	6	4	4	7	7	3	4	10	3
Life After Yasir ArafatHis successors wanted an orderly funeral. They brought in bulldozers to clean up Yasir Arafat #39;s broken-down headquarters in Ramallah.	1	life yasir arafathis successors orderly funeral brought bulldozers clean yasir arafat headquarters ramallah	1	0	1	3	4	4	3	2	8	8	1	8	4	2	7	3	4	10	3
Iraq continues battle against insurgentsBAGHDAD, IRAQ - Insurgents continued to strike against coalition targets in Iraq Saturday, resulting in the deaths of one US soldier and four government employees in Baghdad.	1	iraq continues battle insurgentsbaghdad iraq insurgents continued strike coalition targets iraq saturday deaths soldier government employees baghdad	1	0	1	3	4	4	5	7	2	7	6	5	12	7	10	15	9	17	8
US not to free female scientists: With time running out to save a British hostage in Iraq, US officials said today they were not about to free female Iraqi prisoners as demanded by an al Qaida ally whose group has already beheaded two Americans.	1	free female scientists time running save british hostage iraq officials free female iraqi prisoners demanded al qaida ally beheaded americans	1	0	1	3	4	4	5	7	2	7	8	5	12	7	9	15	6	15	8
Panama Assures Rumsfeld on Canal Security PANAMA CITY, Panama (Reuters) - Panama's security chief told Defense Secretary Donald Rumsfeld on Saturday the Central American nation was working to prevent any terror attack that might close the Panama Canal.	1	panama assures rumsfeld canal security panama city panama reuters panama security chief told defense secretary donald rumsfeld saturday central american nation prevent terror attack close panama canal	1	0	1	3	4	4	5	7	2	7	6	4	4	7	7	5	9	3	3
ACLU Seeks to Challenge Gay Adoption Ban (AP)AP - The American Civil Liberties Union asked the Supreme Court on Friday to hear its challenge to Florida's ban on adoptions by gays.	1	aclu seeks challenge gay adoption ban ap ap american civil liberties union supreme court friday hear challenge florida ban adoptions gays	1	0	1	4	1	5	3	2	1	0	0	8	0	14	13	8	0	14	7
Will there be peace in Great Lakes region?To coordinate and cooperate or not to, that is where the rub is, and that is the key issue when it comes to answering the question whether there will be peace in the Great Lakes region.	1	peace lakes region coordinate cooperate rub key issue answering question peace lakes region	1	0	1	4	1	0	6	6	0	4	0	11	5	0	0	9	13	7	4
Something Positive in Zanu PfBELIEVE it or not, I still have personal friends who are ardent Zanu PF supporters with whom I socialize now and then. With one of them however, our political differences were beginning to affect our personal relationship.	1	positive zanu pfbelieve personal friends ardent zanu pf supporters socialize political differences affect personal relationship	1	1	0	4	1	0	6	6	0	4	0	11	13	14	5	14	4	10	6
Leaders of Spain, Portugal, Latin America urge Falklands dialogue (AFP)AFP - Leaders from Spain, Portugal and their former colonies in Latin America urged Britain and Argentina to renew their dialogue on the Falkland islands, known in Argentina as the Malvinas.	1	leaders spain portugal latin america urge falklands dialogue afp afp leaders spain portugal colonies latin america urged britain argentina renew dialogue falkland islands argentina malvinas	1	0	1	4	1	0	6	6	0	4	0	11	5	0	0	9	13	7	4
Explosion in southern Italy kills eight, gas leak possible causeFOGGIA, Italy Eight people have been killed in an explosion that leveled a two-story apartment building in southern Italy. Firefighters are investigating whether a gas leak is to blame.	1	explosion southern italy kills gas leak causefoggia italy people killed explosion leveled apartment building southern italy firefighters investigating gas leak blame	1	0	1	3	4	4	5	7	2	7	6	4	4	7	7	5	9	3	3
Five Blasts Reported in Spain After ETA Threats MADRID (Reuters) - Five explosions were reported in different parts of Spain Monday after the Basque separatist group ETA threatened to set off a total of seven bombs, Spanish media reported.	1	blasts reported spain eta threats madrid reuters explosions reported spain monday basque separatist eta threatened set total bombs spanish media reported	1	0	1	3	4	4	5	7	2	7	4	1	10	12	7	5	16	4	3
Iraq promises to release one of two high-profile women prisonersBAGHDAD Iraq promised Wednesday to release one of two high-profile women prisoners, but officials denied the decision was linked to demands by militants who purportedly killed two American hostages and are threatening to execute a Briton unless all female	1	iraq promises release women prisonersbaghdad iraq promised wednesday release women prisoners officials denied decision linked demands militants purportedly killed american hostages threatening execute briton female	1	0	1	3	4	4	5	7	2	7	8	5	12	7	9	15	6	15	8
Israel Urges Sanctions on Iran for Nuke Program UNITED NATIONS (Reuters) - Israel urged the United Nations on Wednesday to move toward sanctions against Iran because Tehran is never going to abandon its alleged quest for nuclear weapons.	1	israel urges sanctions iran nuke program united nations reuters israel urged united nations wednesday move sanctions iran tehran abandon alleged quest nuclear weapons	1	0	1	4	1	0	6	6	0	4	0	11	5	0	0	9	13	7	4
Lebanon and Syria have not complied with UN resolution: AnnanUNITED NATIONS - Secretary-General Kofi Annan reported that Syria has not pulled its forces out of Lebanon as called for by the UN Security Council, and said he had requested a timetable from Damascus for its full implementation.	1	lebanon syria complied resolution annanunited nations kofi annan reported syria pulled forces lebanon called security council requested timetable damascus implementation	1	0	1	3	4	0	6	6	0	4	0	11	5	0	0	9	13	7	4
Sharon Says Gaza Evacuation Set for 2005 (AP)AP - Israel's evacuation of the Gaza Strip will begin next summer and will take about 12 weeks, Prime Minister Ariel Sharon said Wednesday, reversing an earlier decision to speed up the pullout.	1	sharon gaza evacuation set ap ap israel evacuation gaza strip summer weeks prime minister ariel sharon wednesday reversing earlier decision speed pullout	1	0	1	3	4	0	6	6	0	4	6	4	4	14	7	3	4	10	3
One hurt in blast at Philippines Muslim regional government complex (AFP)AFP - A powerful home-made bomb has exploded in a compound housing offices of an autonomous Muslim regional government in the southern Philippine city of Cotabato, wounding one person, police said.	1	hurt blast philippines muslim regional government complex afp afp powerful bomb exploded compound housing offices autonomous muslim regional government southern philippine city cotabato wounding person police	1	0	1	3	4	4	5	7	2	7	6	4	4	7	7	5	9	3	3
Lesbians fight to retain post-Soviet freedom (AFP)AFP - Since emerging from the shadow of the prudish Soviet Union a decade ago, sexual minorities have fought to gain a foothold in Russian society. But Russian lesbians now say they are facing growing pressure from authorities to return to the closet.	1	lesbians fight retain freedom afp afp emerging shadow prudish soviet union decade ago sexual minorities fought gain foothold russian society russian lesbians facing growing pressure authorities return closet	1	0	1	4	1	0	6	6	0	4	0	11	0	6	4	4	15	0	17
Kashmir Talks: Failure Could be FatalGIVEN their sordid 58 year-long history, its easy enough to sink into pessimism when discussing India-Pakistan relations. The just-concluded first round of comprehensive talks between the	1	kashmir talks failure fatalgiven sordid history easy sink pessimism discussing relations round comprehensive talks	1	0	1	4	1	0	6	6	0	4	0	11	5	0	0	9	13	7	4
US Supreme Court asked to rule on homosexuals' right to adopt children (AFP)AFP - The American Civil Liberties Union, the leading US civil rights group, petitioned the US Supreme Court to rule on the right of homosexuals to adopt children.	1	supreme court rule homosexuals adopt children afp afp american civil liberties union leading civil rights petitioned supreme court rule homosexuals adopt children	1	0	1	4	1	5	3	2	1	0	10	8	7	8	11	6	12	13	13
Top Senate Dem Calls for Bipartisanship (AP)AP - Rallying a party stung by presidential and congressional losses, the incoming Senate Democratic leader reminded fellow lawmakers on Saturday of their shared commitment to help the nation.	1	top senate dem calls bipartisanship ap ap rallying party stung presidential congressional losses incoming senate democratic leader reminded fellow lawmakers saturday shared commitment nation	1	0	1	4	1	0	6	6	0	4	0	11	0	14	13	8	0	14	7
Iraq PM to address US CongressIraqi Prime Minister Iyad Allawi is to address a joint session of the US Congress as well as meeting President Bush.	1	iraq pm address congressiraqi prime minister iyad allawi address joint session congress meeting president bush	1	0	1	4	1	0	6	6	0	4	0	11	0	14	0	8	0	14	7
Bush Signs Into Law Debt Ceiling Increase&lt;p&gt;&lt;/p&gt;&lt;p&gt; WASHINGTON (Reuters) - President Bush on Friday signed intolaw a measure authorizing an \$800 billion increase in thecredit limit of the United States, the White House said.&lt;/p&gt;	1	bush signs law debt ceiling increase lt gt lt gt lt gt washington reuters president bush friday signed intolaw measure authorizing billion increase thecredit limit united white house lt gt	0	1	3	4	1	5	0	0	1	4	10	7	3	10	15	0	0	16	0
Chirac seeks vote on Turkey bidFrench President Jacques Chirac says France should hold a referendum on Turkey's entry to the European Union.	1	chirac seeks vote turkey bidfrench president jacques chirac france hold referendum turkey entry european union	1	0	1	4	1	0	6	6	0	4	0	11	5	0	0	9	13	7	4
Bambang unveils plans for his first 100 daysJAKARTA - Mr Susilo Bambang Yudhoyono, who is almost certain to emerge the winner of the country #39;s first direct presidential polls, has begun to unveil plans for his first 100 days in power.	1	bambang unveils plans daysjakarta susilo bambang yudhoyono emerge winner country direct presidential polls begun unveil plans days power	1	0	1	4	1	0	6	6	0	4	0	11	0	14	13	8	0	14	7
UDA pledge ceasefireThe UDA, Northern Ireland #39;s largest loyalist paramilitary group has pledged to end all violence and work towards complete disarmament.	1	uda pledge ceasefirethe uda northern ireland largest loyalist paramilitary pledged violence complete disarmament	1	0	1	3	4	0	6	6	0	4	6	4	5	0	0	9	13	7	4
US planes again hit Sadr CityBAGHDAD US warplanes fired on targets in the east Baghdad slum of Sadr City on Thursday, the second day of fighting in the Shiite militia stronghold.	1	planes hit sadr citybaghdad warplanes fired targets east baghdad slum sadr city thursday day fighting shiite militia stronghold	1	0	1	3	4	4	5	7	2	7	6	5	12	7	10	15	9	17	8
PLO chief holds landmark talks in DamascusA high-ranking Palestinian Liberation Organization delegation led by Chairman Mahmoud Abbas held landmark talks with the Syrian leaders in Damascus Monday.	1	plo chief holds landmark talks damascusa palestinian liberation organization delegation led chairman mahmoud abbas held landmark talks syrian leaders damascus monday	1	0	1	4	1	0	6	6	0	4	0	11	5	0	0	3	13	10	4
PM Promotes His Image of Mostly Safe Iraq (AP)AP - It may have seemed odd that interim Iraqi Prime Minister Ayad Allawi felt compelled to spend a few of his precious first minutes at the White House giving reporters a geography lesson.	1	pm promotes image safe iraq ap ap odd interim iraqi prime minister ayad allawi compelled spend precious minutes white house reporters geography lesson	1	0	1	3	4	0	6	6	0	4	0	5	12	14	13	15	0	14	8
Russia Seeks UN Terrorist Asylum Abuse Crackdown UNITED NATIONS (Reuters) - Russia on Thursday proposed a U.N. crackdown on the abuse of political asylum for terrorist purposes, raising pressure on Western states to hand over wanted Chechen activists.	1	russia seeks terrorist asylum abuse crackdown united nations reuters russia thursday proposed crackdown abuse political asylum terrorist purposes raising pressure western hand chechen activists	1	0	1	4	1	0	6	6	0	4	8	5	5	0	0	9	13	7	4
Rumsfeld Raises Prospect of Limited Iraq Elections (Reuters)Reuters - Defense Secretary Donald Rumsfeld on\Thursday raised the possibility that some areas of Iraq night\be excluded from elections scheduled for January if security\could not be guaranteed.	1	rumsfeld raises prospect limited iraq elections reuters reuters defense secretary donald rumsfeld raised possibility iraq excluded elections scheduled january guaranteed	1	0	1	3	4	0	6	6	0	4	0	5	12	7	10	15	0	17	8
UN deadlock defeats cloning banThe United Nations has shelved efforts to draft a treaty banning the cloning of human embryos in a setback for the Bush administration.	1	deadlock defeats cloning banthe united nations shelved efforts draft treaty banning cloning human embryos setback bush administration	1	0	1	4	1	0	6	6	0	4	0	11	5	0	0	9	13	7	4
EU set to launch 'transit camps'EU ministers agree to set up five pilot reception centres in Africa to process asylum applications.	1	eu set launch ministers agree set pilot reception centres africa process asylum applications	1	0	1	4	1	0	6	6	0	4	0	11	5	0	0	9	13	7	4
Leaders converge on MelbournePRIME Minister John Howard and Labor leader Mark Latham will converge on Melbourne today as the city gets into the swing of AFL celebrations.	1	leaders converge melbourneprime minister john howard labor leader mark latham converge melbourne city swing afl celebrations	1	0	1	4	1	0	6	6	0	4	0	11	0	14	13	8	0	14	7
Nigerian army kills 24 Islamic militants near Cameroon border (AFP)AFP - The Nigerian army killed 24 Islamic militants who had taken refuge in the mountainous northeastern region bordering Cameroon, the spokesman for the northeastern state of Borno said.	1	nigerian army kills islamic militants cameroon border afp afp nigerian army killed islamic militants refuge mountainous northeastern region bordering cameroon spokesman northeastern borno	1	0	1	3	4	4	5	7	2	7	6	4	4	7	7	15	9	3	3
North Korea-watchers ponder significance of Kim #39;s changed statusSEOUL - Watchers of the reclusive North Korean regime are buzzing about reports that might indicate a change in the cult of personality surrounding Kim Jong Il.	1	north ponder significance kim changed statusseoul watchers reclusive north korean regime buzzing reports change cult personality surrounding kim jong il	1	0	1	4	1	0	6	6	0	4	0	11	5	0	0	9	13	7	4
Kidnap fears for lost tsunami boyPolice in tsunami-hit Thailand search for a Swedish boy feared kidnapped by child sex traffickers.	1	kidnap fears lost tsunami boypolice thailand search swedish boy feared kidnapped child sex traffickers	1	0	1	3	4	4	5	7	2	7	8	4	7	8	11	13	6	3	10
Obama Balances Stardom, Local Interests (AP)AP - In the days since he was elected to the U.S. Senate, Barack Obama has chatted by phone with President Bush, had his picture in People magazine and appeared several times on national television.	1	obama balances stardom local ap ap days elected senate barack obama chatted phone president bush picture people magazine appeared times national television	1	0	1	4	1	0	6	6	0	4	0	11	0	14	13	8	0	14	7
Iran Agrees to Suspend Uranium Enrichment (AP)AP - Iran has agreed to fully suspend uranium enrichment and linked activities that Washington asserts are part of a nuclear weapons program, diplomats said Sunday.	1	iran agrees suspend uranium enrichment ap ap iran agreed suspend uranium enrichment linked activities washington asserts nuclear weapons program diplomats sunday	1	0	1	4	1	0	6	6	0	4	0	11	5	0	0	9	13	7	4
Palestinian says Americans' killers can't be arrestedGAZA -- Palestinian security forces know who was behind the killing of three Americans in Gaza nearly a year ago but cannot act against the factions while fighting with Israel continues, a top Palestinian security official said.	1	palestinian americans killers arrestedgaza palestinian security forces killing americans gaza ago factions fighting israel continues top palestinian security official	1	0	1	3	4	4	5	7	2	7	6	4	4	7	7	3	4	10	3
Al Qaeda Urge Wide-Scale Muslim ResistanceAl Qaeda #39;s No. 2 man Ayman Zawahiri called for an all-out armed resistance in the Muslim world against the West and Jews whom he described as crusaders.	1	al qaeda urge muslim resistanceal qaeda ayman zawahiri called armed resistance muslim west jews crusaders	1	0	1	3	4	4	5	7	2	7	8	5	12	7	9	15	6	15	8
Myanmar frees nearly 4,000 prisonersUN Secretary General Kofi Annan has praised the release of several political prisoners in Myanmar, the BBC reported Saturday. Annan also said he hoped others still behind	1	myanmar frees prisonersun secretary kofi annan praised release political prisoners myanmar bbc reported saturday annan hoped	1	0	1	4	1	0	6	6	0	4	8	5	5	0	9	9	13	7	4
Northern Irish Protestant group pledges to end violenceNorthern Ireland #39;s main pro-British paramilitary group, The Ulster Defence Association (UDA), has pledged to end all violence and work towards complete disarmament.	1	northern irish protestant pledges violencenorthern ireland main paramilitary ulster defence association uda pledged violence complete disarmament	1	0	1	4	1	0	6	6	0	4	0	11	5	0	0	9	13	7	4
Stocks Climb on Strong Economic DataNEW YORK - Newly optimistic investors sent stocks sharply higher Friday, propelling the Dow Jones industrials up more than 100 points, after economic data showed strength in manufacturing and construction. Wall Street greeted the departure of PeopleSoft Inc.'s chief executive by buying up technology shares...	1	stocks climb strong economic datanew york newly optimistic investors stocks sharply friday propelling dow jones industrials economic data strength manufacturing construction wall street greeted departure peoplesoft chief executive buying technology shares	0	1	3	2	0	6	4	8	9	10	11	12	11	3	6	16	17	18	12
Protesters Denounce APEC Summit in ChileThousands of protesters marched peacefully through downtown Santiago on Friday, expressing anger at a weekend summit of Pacific Rim leaders, particularly President Bush. But violence later erupted at a rock concert.	1	protesters denounce apec summit chilethousands protesters marched peacefully downtown santiago friday expressing anger weekend summit pacific rim leaders president bush violence erupted rock concert	1	0	1	3	1	0	6	6	0	4	0	11	5	0	0	9	13	7	4
Hu issues certificates to two new generalsChinese President Hu Jintao presented on Saturday certificates to two nearly promoted generals in his capacity as chairman of the Central Military Commission (CMC) of the Communist Party of China.	1	hu issues certificates generalschinese president hu jintao saturday certificates promoted generals capacity chairman central military commission cmc communist party china	1	0	1	4	1	0	6	6	0	4	0	11	0	14	13	8	0	14	7
S Leone takes control of FreetownUN peacekeepers hand control of security in the Sierra Leone capital, Freetown, to local forces after the end of a brutal war.	1	leone takes control freetownun peacekeepers hand control security sierra leone capital freetown local forces brutal war	1	0	1	3	4	4	5	7	2	7	6	5	12	7	10	15	9	17	8
Activists Want Divestment From Sudan (AP)AP - Black activists and religious groups are pressing public pension funds to divest a purported #36;91 billion in holdings of companies operating in oil-rich Sudan.	1	activists divestment sudan ap ap black activists religious pressing public pension funds divest purported billion holdings companies operating sudan	0	1	1	4	1	5	0	0	1	0	10	7	3	10	15	0	8	16	0
Funding of Election Monitors A ConcernA delegation that was paid to watch the Ukraine elections by a lobbyist affiliated with one of the candidates has some saying the move taints the process of promoting democracy.	1	funding election monitors concerna delegation paid watch ukraine elections lobbyist affiliated candidates move taints process promoting democracy	1	0	1	4	1	0	6	6	0	4	0	11	0	14	13	8	0	14	7
Clinton Rips Starr, Media on Prosecution (AP)AP - In a prime-time television outburst, Bill Clinton ripped old nemesis Kenneth Starr and what the former president portrayed as a gullible media eager to report every "sleazy thing" leaked from a prosecutor bent on bringing him down.	1	clinton rips starr media prosecution ap ap television outburst bill clinton ripped nemesis kenneth starr president portrayed gullible media eager report sleazy leaked prosecutor bent bringing	1	0	1	4	1	0	3	2	0	4	8	5	0	14	9	8	6	15	7
U.S. Won't Release Female Iraq PrisonersBAGHDAD, Iraq - Authorities insisted on Thursday that they won't give in to militants' demands to free female Iraqi prisoners despite the plea of a tearful British hostage begging Britain to save his life in a video released by his captors. Meanwhile, Iraq's most powerful Shiite cleric, Grand Ayatollah Ali al-Sistani, said that increasing violence must not …	1	wo release female iraq prisonersbaghdad iraq authorities insisted thursday wo militants demands free female iraqi prisoners plea tearful british hostage begging britain save life video released captors iraq powerful shiite cleric grand ayatollah ali increasing violence pretext delaying elections scheduled late january	1	0	1	3	4	4	5	7	2	7	8	5	12	7	9	15	6	17	8
Terror scares hit AustraliaAustralia #39;s frayed nerves were given another jolt yesterday by the discovery of a home-made firebomb on a Virgin Blue airliner and the unrelated arrest of a man accused of threatening terror attacks in Southeast Asia.	1	terror scares hit australiaaustralia frayed nerves jolt yesterday discovery firebomb virgin blue airliner unrelated arrest accused threatening terror attacks southeast asia	1	0	1	3	4	4	3	2	2	7	8	5	12	8	11	13	6	15	10
Van Gogh #39;s murder brings out Holland #39;s contradictionsThe murder of Dutch filmmaker Theo van Gogh by a young Muslim of Moroccan descent has shaken Holland to its very foundations. To most people, including the Dutch, the killing and its violent	1	van gogh murder brings holland contradictionsthe murder dutch filmmaker theo van gogh muslim moroccan descent shaken holland foundations people including dutch killing violent	1	0	1	3	4	4	5	7	2	7	8	5	12	7	9	5	6	15	3
Iraqi Leader Thanks U.S. in Speech to CongressOffering a simple, "Thank you America," Iraqi interim Prime Minister Ayad Allawi declared Thursday that his country is succeeding in its effort to move past the war that ousted Saddam Hussein.	1	iraqi leader speech congressoffering simple america iraqi interim prime minister ayad allawi declared thursday country succeeding effort move war ousted saddam hussein	1	0	1	3	4	0	6	6	0	4	8	5	12	14	13	15	6	15	8
France Opposes Immigrant Transit Camps in AfricaFrance, Sweden and Belgium shot down a German proposal to set up European Union refugee processing centres in North Africa, arguing that the idea would do more harm than good.	1	france opposes immigrant transit camps africafrance sweden belgium shot german proposal set european union refugee processing centres north africa arguing idea harm	1	0	1	4	1	0	6	6	0	4	0	11	5	0	0	9	13	7	4
Man Sets Himself on Fire Near White House (AP)AP - A man set himself afire Monday just outside a White House gate and repeatedly yelled "Allah Allah" as a Secret Service officer held him facedown on the sidewalk.	1	sets fire white house ap ap set afire monday white house gate repeatedly yelled allah allah secret service officer held facedown sidewalk	1	0	1	4	1	0	6	6	0	4	0	11	0	14	13	8	0	14	9
Israeli Tanks Surge Into Gaza Refugee Camp -Witnesses GAZA (Reuters) - A column of Israeli tanks surged into the heart of the Jabalya refugee camp in the northern Gaza Strip on Thursday as the army broadened its sweep for militants behind a deadly rocket attack on an Israeli town.	1	israeli tanks surge gaza refugee camp gaza reuters column israeli tanks surged heart jabalya refugee camp northern gaza strip thursday army broadened sweep militants deadly rocket attack israeli town	1	0	1	3	4	4	5	7	2	7	6	4	4	7	7	3	4	10	3
Doesn't matter to me if health care is privately delivered:Alta's Klein (Canadian Press)Canadian Press - EDMONTON (CP) - Alberta Premier Ralph Klein acknowledged Tuesday that he personally doesn't have a problem with private delivery of health-care services.	1	matter health care privately delivered alta klein canadian press canadian press edmonton cp alberta premier ralph klein acknowledged tuesday personally private delivery services	0	1	1	4	1	5	0	0	1	0	10	7	3	10	15	0	8	16	19
Hostages plight clouds meeting of Blairs partyBRIGHTON, England The annual conference of Prime Minister Tony Blair #39;s Labour Party opened here Monday under the pall of the war in Iraq, as the fate of the British hostage Ken Bigley remained uncertain amid fresh appeals for his release from family	1	hostages plight clouds meeting blairs partybrighton england annual conference prime minister tony blair labour party monday pall war iraq fate british hostage ken bigley remained uncertain amid fresh appeals release family	1	0	1	4	4	0	6	6	0	4	8	5	12	0	9	15	6	15	8
Unrest Spreads To Southern Iraq(CBS/AP) As US forces continued to bombard the restive city of Fallujah and clashed with militants in the streets of Baghdad, there was unrest in the normally quiet British-patrolled city of Basra.	1	unrest spreads southern iraq forces continued bombard restive city fallujah clashed militants streets baghdad unrest quiet city basra	1	0	1	3	4	4	5	7	2	7	6	4	4	7	10	15	9	17	8
Taiwan Acknowledges Minister #39;s Improper Wording #39; on SingaporeTaiwan Foreign Minister Chen Tan- sun, who dismissed Singapore as a country the size of a booger, #39; #39; regretted his improper wording, #39; #39; said Foreign Ministry spokesman Michel Lu.	1	taiwan acknowledges minister improper wording singaporetaiwan foreign minister chen sun dismissed singapore country size booger regretted improper wording foreign ministry spokesman michel lu	1	0	1	4	1	0	6	6	0	4	0	11	5	0	0	9	13	7	4
UN council arrives in NairobiUN Security Council members have arrived in Nairobi for a two-day meeting devoted to the conflicts engulfing Sudan, including the western Darfur region.	1	council arrives nairobiun security council arrived nairobi meeting devoted conflicts engulfing sudan including western darfur region	1	0	1	3	4	0	6	6	0	4	0	11	5	0	0	9	13	7	4
Still under fire, US troops shifting to relief effortUS forces in Fallujah offer food and first aid as they face scattered pockets of guerrilla resistance.	1	fire troops shifting relief effortus forces fallujah offer food aid scattered pockets guerrilla resistance	1	0	1	3	4	4	5	7	2	7	6	4	12	7	10	15	9	17	8
5 dead in Dubai airport accidentDUBAI - A steel mesh wall collapsed on workers building a multi-billion-dollar extension to Dubai #39;s international airport yesterday, leaving five dead and 12 injured, authorities said.	1	dead dubai airport accidentdubai steel mesh wall collapsed workers building extension dubai international airport yesterday leaving dead injured authorities	1	0	1	3	4	4	5	7	2	7	6	4	4	7	7	5	9	3	3
South Korea president in Brazil (AFP)AFP - South Korea's President Roh Moo-Hyun started an official visit to Brazil as part of his country's campaign to find new business in the region.	1	south korea president brazil afp afp south korea president roh started official visit brazil country campaign business region	1	0	1	4	1	0	6	6	0	4	0	11	5	0	0	9	13	7	4
Gunmen free CNN journalistPalestinian gunmen yesterday released a CNN journalist abducted in Gaza City apparently to pressure members of an Arab minority group not to serve in the Israeli army.	1	gunmen free cnn journalistpalestinian gunmen yesterday released cnn journalist abducted gaza city pressure arab minority serve israeli army	1	0	1	3	4	4	5	7	2	7	6	5	12	7	9	3	4	10	3
Sharon takes step towards peaceARIEL SHARON, the Israeli Prime Minister, made his first conciliatory gesture towards Palestinians after the death of Yassir Arafat when he said that he would consider co-ordinating the dismantling of Jewish settlements in the Gaza Strip with a new	1	sharon takes step peaceariel sharon israeli prime minister conciliatory gesture palestinians death yassir arafat dismantling jewish settlements gaza strip	1	0	1	3	4	0	6	6	0	4	6	4	4	7	7	3	4	10	3
APEC Ministers Urge New Effort on Trade TalksPacific Rim trading nations said on Wednesday they should pool their influence to energize talks to free up world trade. As trade and foreign ministers from the 21-member Asia-Pacific	1	apec ministers urge effort trade talkspacific rim trading nations wednesday pool influence energize talks free trade trade foreign ministers	1	0	1	4	1	0	6	6	0	4	0	11	5	0	0	9	13	7	4
Democrats Question Kerry's Campaign FundsDemocratic Party leaders said Wednesday they want to know why Sen. John Kerry ended his presidential campaign with more than \$15 million in the bank, money that could have helped Democratic candidates across the country.	1	democrats question kerry campaign fundsdemocratic party leaders wednesday john kerry presidential campaign bank money helped democratic candidates country	1	0	1	4	1	0	6	6	0	4	0	11	0	14	13	8	0	14	7
Quietly, tide of opinion turns on Chechen warAlthough discussion of the war has been marginalized, many experts say Russians may not prefer it that way.	1	quietly tide opinion chechen waralthough discussion war marginalized experts russians prefer	1	0	1	4	1	0	6	6	0	4	0	11	0	14	13	8	0	14	7
Palestinians investigate rumours that Israel poisoned ArafatTHE Palestinian Authority is to set up an official commission of inquiry into Yasser Arafats death amid increasing rumours among the Palestinian public that he was poisoned by Israel.	1	palestinians investigate rumours israel poisoned arafatthe palestinian authority set official commission inquiry yasser arafats death amid increasing rumours palestinian public poisoned israel	1	0	1	3	4	0	6	6	0	4	6	4	4	7	7	3	4	10	3
President terms Farooqi #39;s death big achievementTHE HAGUE: President General Pervez Musharraf Monday described the killing of Amjad Farooqi as big achievement by security forces and said quot;important terrorist has been eliminated.	1	president terms farooqi death achievementthe hague president pervez musharraf monday killing amjad farooqi achievement security forces quot terrorist eliminated	1	0	1	3	4	0	6	6	0	4	0	11	0	7	7	8	6	15	3
Feds: Syrian Clampdown on Terror Positive (AP)AP - A Syrian crackdown on terror groups would be the best way to halt violence in Syria and promote peace in the Middle East, the State Department said Monday after the assassination in Damascus of a leader of Hamas' bombing unit.	1	feds syrian clampdown terror positive ap ap syrian crackdown terror halt violence syria promote peace middle east department monday assassination damascus leader hamas bombing unit	1	0	1	3	4	0	6	6	0	4	0	11	5	0	0	3	4	10	4
Embattled Mortgage Giant Agrees to Meet New StandardsFannie Mae agreed to keep more cash on hand while it corrects accounting problems, a U.S. regulator said.	1	embattled mortgage giant agrees meet standardsfannie mae agreed cash hand corrects accounting regulator	0	1	3	4	1	5	0	0	1	0	10	7	3	10	15	0	8	16	19
Fox to push Bush on migration at APECMexico President Vicente Fox said Wednesday he will meet with US President George W. Bush in Chile during the economic summit of Pacific Rim nations.	1	fox push bush migration apecmexico president vicente fox wednesday meet president george bush chile economic summit pacific rim nations	1	0	1	4	1	0	6	6	0	4	0	11	0	14	13	8	0	14	7
China, Singapore Say World Must Help Calm Taiwan RowChina and Singapore on Monday urged the international community to help calm Beijing #39;s dispute with Taiwan over its push for independence.	1	china singapore calm taiwan rowchina singapore monday urged international community calm beijing dispute taiwan push independence	1	0	1	4	1	0	6	6	0	4	0	11	5	0	0	9	13	7	4
Holiday Stamps to Be Issued in Oct. (AP)AP - Holiday postage stamps celebrating Christmas, Hanukkah and Kwanzaa will be issued next month, the U.S. Postal Service announced Monday.	1	holiday stamps issued ap ap holiday postage stamps celebrating christmas hanukkah kwanzaa issued month postal service announced monday	0	1	0	1	3	3	7	3	6	6	5	6	13	5	14	6	5	8	9
Official: MLB to Move Expos to WashingtonWASHINGTON - Major League Baseball will announce Wednesday that Washington will be the new home of the Montreal Expos, bringing the national pastime back to the nation's capital for the first time in 33 years, The Associated Press has learned. A city official, speaking on condition of anonymity, said Washington has been notified by Major League Baseball of…	1	official mlb move expos washingtonwashington major league baseball wednesday washington montreal expos bringing national pastime nation capital time press learned city official speaking condition anonymity washington notified major league baseball impending announcement	0	2	2	0	2	2	1	5	5	3	3	3	9	4	8	11	3	9	9
Bishop Indicted on Child Rape ChargesSPRINGFIELD, Mass. - Bishop Thomas Dupre, the former head of the Springfield Diocese, was indicted Monday on child rape charges, accused of molesting two boys in the 1970s, the county prosecutor said...	1	bishop indicted child rape chargesspringfield mass bishop thomas dupre head springfield diocese indicted monday child rape charges accused molesting boys 1970s county prosecutor	1	0	1	4	1	5	3	2	1	0	8	8	7	8	11	13	6	15	10
A Graphic Film of Protest, and Cries of BlasphemyThe director of a 10-minute film shown on Dutch television hopes to draw attention to what she says is widespread but hidden violence against Muslim women.	1	graphic film protest cries blasphemythe director film dutch television hopes draw attention widespread hidden violence muslim women	1	0	1	3	4	1	2	1	3	2	4	5	12	12	9	2	16	4	15
Presidential campaign turns even nastier (AFP)AFP - The US presidential race hit a new low in nastiness with images of Osama bin Laden and epithets such as quot;despicable quot; and quot;un-American quot; bombarding voters before a crucial series of televised debates.	1	presidential campaign nastier afp afp presidential race hit low nastiness images osama bin laden epithets quot despicable quot quot quot bombarding voters crucial series televised debates	1	0	1	4	1	0	6	6	0	4	0	11	0	14	13	8	0	14	7
India #39;s Offer for Peace Talks on Kashmir Is Sweetened With AidIndia #39;s prime minister, Manmohan Singh, came to Kashmir on Wednesday offering unconditional talks with anyone willing to renounce violence and a \$5.3 billion economic	1	india offer peace talks kashmir sweetened aidindia prime minister manmohan singh kashmir wednesday offering unconditional talks renounce violence billion economic	1	0	1	4	1	0	6	6	0	4	0	11	5	0	0	9	13	7	4
Nursery rhymes more violent than TV (Reuters)Reuters - Children's nursery rhymes contain 10 times more violence than television shows broadcast before the\9 p.m. "watershed" after which more adult content can be shown, research has said.	1	nursery rhymes violent tv reuters reuters children nursery rhymes times violence television broadcast watershed adult content	1	0	1	3	4	4	5	7	2	9	7	9	6	13	14	6	12	6	13
Kashmiris reject Indian PM #39;s offerMUZAFFARABAD, Nov 17: A multi-party alliance fighting Indian rule in Kashmir rejected on Wednesday the economic package offered by Indian Prime Minister Dr Manmohan Singh during	1	kashmiris reject indian pm offermuzaffarabad nov alliance fighting indian rule kashmir rejected wednesday economic package offered indian prime minister dr manmohan singh	1	0	1	4	1	0	6	6	0	4	0	11	5	0	0	9	13	7	4
Gangs on Prowl in Storm-Wracked Haiti (AP)AP - Victims who lost relatives, homes and belongings in Tropical Storm Jeanne are now tormented by street gangs who attack food convoys, raid homes at night and shoot those who get in their way.	1	gangs prowl haiti ap ap victims lost relatives homes belongings tropical storm jeanne tormented street gangs attack food convoys raid homes night shoot	1	0	1	3	4	4	5	7	2	7	6	4	4	11	12	5	9	12	11
Committee Recommends Abusive Clergy Ban (AP)AP - A committee overseeing a review of the child protection plan adopted by Roman Catholic bishops has recommended preserving a ban on church work for clerics who molest young people, according to a document the panel has sent to all U.S. bishops.	1	committee recommends abusive clergy ban ap ap committee overseeing review child protection plan roman catholic bishops recommended preserving ban church clerics molest people document panel bishops	1	0	1	4	1	0	3	2	0	0	0	8	0	14	11	8	0	14	7
Blair, Paisley confer on N. IrelandBritish Prime Minister Tony Blair met in London with Democratic Unionist leader Ian Paisley Monday about power sharing with Northern Ireland #39;s Assembly.	1	blair paisley confer irelandbritish prime minister tony blair met london democratic unionist leader ian paisley monday power sharing northern ireland assembly	1	0	1	4	1	0	6	6	0	4	0	11	0	14	13	8	4	14	7
Spanish teenager pleads guilty in first trial stemming from Madrid &lt;b&gt;...&lt;/b&gt;MADRID, Spain There #39;s been a guilty plea in the first trial stemming from the Madrid train bombings earlier this year. A 16-year-old has pleaded guilty to charges he helped transport dynamite used in the attack.	1	spanish teenager pleads guilty trial stemming madrid lt gt lt gt madrid spain guilty plea trial stemming madrid train bombings earlier pleaded guilty charges helped transport dynamite attack	1	0	1	4	1	5	3	2	3	0	8	8	7	8	11	13	6	15	10
Rivalry Blamed in Philippine Communist Leader #39;s DeathA leader of a Philippine communist breakaway group has been killed, in what may be rivalry among former comrades. The shooting is the latest in a series of assassinations of Communist Party defectors.	1	rivalry blamed philippine communist leader deatha leader philippine communist breakaway killed rivalry comrades shooting series assassinations communist party defectors	1	0	1	3	4	4	5	7	2	7	6	4	4	7	7	5	9	3	3
Producer Price Surge Fuels Inflation FearsProducer prices surged 1.7 percent in October, their sharpest monthly increase in nearly 15 years.	1	producer price surge fuels inflation fearsproducer prices surged percent october sharpest monthly increase	0	1	3	2	0	6	4	8	9	10	11	12	11	3	6	16	17	18	12
U.S. Commander in Iraq Calls Shooting 'Tragic'The killing of a wounded Iraqi by a U.S. Marine in Fallujah was termed a "tragic incident" by the U.S. military commander in Iraq on Tuesday as Arab satellite channels replayed unedited footage of the shooting as often as every half-hour.	1	commander iraq calls shooting killing wounded iraqi marine fallujah termed tragic incident military commander iraq tuesday arab satellite channels replayed unedited footage shooting	1	0	1	3	4	4	5	7	2	7	6	5	12	7	7	15	9	17	8
Hassan: #39;Abhorrent act #39; says BlairWestern political leaders have united to condemn the kidnappers of charity worker Margaret Hassan after a video surfaced apparently showing a militant firing a pistol into the head of a blindfolded woman wearing an orange jumpsuit.	1	hassan abhorrent blairwestern political leaders united condemn kidnappers charity worker margaret hassan video surfaced militant firing pistol head blindfolded woman wearing orange jumpsuit	1	0	1	3	4	4	5	7	2	7	8	5	12	7	9	15	6	15	8
Pakistan's Musharraf calls for unity against global terrorism (AFP)AFP - Pakistani President Pervez Musharraf kicked off a three-day visit to Italy by calling on the world community to stand united in the fight against global terrorism.	1	pakistan musharraf calls unity global terrorism afp afp pakistani president pervez musharraf kicked visit italy calling community stand united fight global terrorism	1	0	1	4	1	0	6	6	0	4	0	11	5	0	0	9	13	7	4
ConocoPhillips boosts LUKoil stake to 10 percent (AFP)AFP - US oil major ConocoPhillips has boosted its stake in Russia's second-largest oil producer LUKoil to 10 percent, giving Conoco at least one representative on LUkoil's board.	1	conocophillips boosts lukoil stake percent afp afp oil major conocophillips boosted stake russia oil producer lukoil percent conoco representative lukoil board	0	1	3	2	0	6	4	8	9	10	11	12	11	3	6	16	5	8	19
Consumer Confidence Dips in SeptemberNEW YORK - Job worries helped push consumer confidence down in September for the second consecutive month, a New York-based private research group said Tuesday. The Consumer Confidence Index fell 1.9 points to 96.8 from a revised reading of 98.7 in August, according to The Conference Board...	1	consumer confidence dips septembernew york job worries helped push consumer confidence september consecutive month private tuesday consumer confidence fell revised reading august conference board	0	1	3	2	0	6	4	8	9	10	11	12	11	3	6	16	17	18	12
Putin Says Russia Working on New Nuclear Systems (Reuters)Reuters - Russia is working on new nuclear missile\systems that other powers do not have in order to protect\itself against future security challenges, President Vladimir\Putin said Wednesday.	1	putin russia nuclear systems reuters reuters russia nuclear powers future security challenges president wednesday	1	0	1	4	1	0	6	6	0	4	0	11	5	0	0	9	13	7	4
Confusion Over Afghan UN Hostages17 November 2004 -- Afghanistan #39;s Interior Ministry believes three UN workers abducted nearly three weeks ago in Afghanistan are probably still being held in the area.	1	confusion afghan hostages17 november afghanistan interior ministry believes workers abducted weeks ago afghanistan held	1	0	1	3	4	4	5	7	2	7	8	5	12	7	9	15	6	15	8
Focus on deadly Africa diseasesThe UN's Global Fund meets African leaders in Tanzania for talks on fighting the world's deadliest diseases.	1	focus deadly africa diseasesthe global fund meets african leaders tanzania talks fighting deadliest diseases	1	0	1	3	4	0	6	6	0	4	0	11	5	0	0	9	13	7	4
Arafat was not poisonedParis - Doctors who treated Palestinian leader Yasser Arafat believe he died of a blood condition called disseminated intravascular coagulation (DIC) and have ruled out poisoning, Le Monde newspaper reported on Wednesday.	1	arafat poisonedparis doctors treated palestinian leader yasser arafat died blood condition called disseminated intravascular coagulation dic ruled poisoning le monde newspaper reported wednesday	1	0	1	3	4	4	5	7	2	7	6	4	4	2	7	3	4	10	3
Nigerian oil flows despite rebel threat-companiesOil should continue to flow from Nigeria, the world #39;s seventh largest exporter, despite a rebel threat to attack foreign oil workers in an quot;all-out war quot; due to start on Friday, multinational energy companies said.	1	nigerian oil flows rebel continue flow nigeria seventh largest exporter rebel threat attack foreign oil workers quot war quot start friday multinational energy companies	1	0	3	3	0	6	4	8	9	10	11	12	11	0	10	9	17	18	12
Smoking ban would target pubsritain #39;s government proposed banning smoking in most public places yesterday, setting off debate over what one smoker decried as the brainchild of a busybody quot;nanny state.	1	smoking ban target pubsritain government proposed banning smoking public yesterday setting debate smoker decried brainchild busybody quot nanny	1	0	1	4	1	0	6	6	0	4	0	11	0	14	13	8	0	14	7
US Army considers shorter combat toursWASHINGTON -- The US Army may shorten yearlong combat tours in Iraq and Afghanistan amid concerns the long and perilous duty is making it difficult to recruit soldiers and keep current ones, officials said yesterday.	1	army considers shorter combat tourswashington army shorten yearlong combat tours iraq afghanistan amid concerns perilous duty difficult recruit soldiers current officials yesterday	1	0	1	3	4	4	5	7	2	7	6	5	12	7	9	15	9	17	3
Is More Aid Needed to Solve Africa's Woes? (Reuters)Reuters - American economist Jeffrey Sachs\has a novel way to tackle African poverty: Shower more aid on\the world's poorest continent.	1	aid solve africa woes reuters reuters american economist jeffrey tackle african poverty shower aid poorest continent	1	0	1	4	4	0	6	6	0	4	0	11	5	0	0	9	13	7	4
US forces bomb Fallujamany people were killed. The US military last week claimed to have killed around 100 of Zarqawi #39;s. militiamen who have the area largely under their control.	1	forces bomb fallujamany people killed military week claimed killed zarqawi militiamen control	1	0	1	3	4	4	5	7	2	7	6	4	4	7	7	5	9	3	3
Sudan Reportedly Hiding Arab Fighters in Southern SudanUnder international pressure to disarm and disband Arab militias in troubled Darfur, Sudan #39;s government is instead reportedly moving hundreds, possibly thousands, of the fighters from Darfur to remote areas of southern Sudan.	1	sudan reportedly hiding arab fighters southern sudanunder international pressure disarm disband arab militias troubled darfur sudan government reportedly moving hundreds thousands fighters darfur remote southern sudan	1	0	1	3	4	4	5	7	2	7	6	5	5	0	10	15	13	17	4
US doctor says evacuations, body armor has helped save lives in &lt;b&gt;...&lt;/b&gt;The commander of the biggest US military hospital abroad said Tuesday that American troops body armor and speedy evacuations appear to be helping save lives in the	1	doctor evacuations body armor helped save lives lt gt lt gt commander biggest military hospital abroad tuesday american troops body armor speedy evacuations helping save lives	1	0	1	3	4	4	5	7	2	7	6	5	12	7	7	15	9	8	3
Swedes beam poetry into outer space (Reuters)Reuters - Swedish poets have broadcast their work into outer space by radio to give alien life forms -- if they exist -- a taste\of earthling literature.	1	swedes beam poetry outer space reuters reuters swedish poets broadcast outer space radio alien life forms exist earthling literature	1	0	0	4	5	0	3	2	8	8	1	0	8	6	4	4	15	0	17
Israel levels new accusations against SyriaWithout acknowledging responsibility for the car-bombing death of a Hamas activist in Syria, Israeli Deputy Defense Minister Zeev Boim yesterday issued a toughly worded	1	israel levels accusations syriawithout acknowledging responsibility death hamas activist syria israeli deputy defense minister zeev boim yesterday issued toughly worded	1	0	1	3	4	4	5	7	2	7	6	4	4	7	7	3	4	10	3
Cowboys Defeat Redskins 21-18LANDOVER, Md. - Bill Parcells celebrated the touchdown with a big smile and his fist thrust high in the air...	1	cowboys defeat redskins md bill parcells celebrated touchdown smile fist thrust air	0	2	2	0	2	2	1	4	7	5	9	2	1	1	1	1	11	5	1
Bombings at Two Buenos Aires Banks Kill 1 (AP)AP - Homemade bombs exploded in two Buenos Aires banks Wednesday, killing a security guard, police said.	1	bombings buenos aires banks kill ap ap homemade bombs exploded buenos aires banks wednesday killing security guard police	1	0	1	3	4	4	5	7	2	7	6	4	4	7	7	5	9	3	3
Explosions rock Argentine banksA blast rocks a branch of Citibank in the Argentine capital, Buenos Aires, killing a security guard, reports say.	1	explosions rock argentine banksa blast rocks branch citibank argentine capital buenos aires killing security guard reports	1	0	1	3	4	4	5	7	2	7	6	4	4	7	7	5	9	3	3
May have been transmitted between humans- reportThailand confirmed its second death from bird flu Tuesday, and said the fatal case might have been transmitted by a human victim rather than a bird, according to published report.	1	transmitted reportthailand confirmed death bird flu tuesday fatal transmitted human victim bird published report	1	0	1	4	5	0	3	2	8	8	1	0	8	2	11	10	10	0	16
Queen Urges Thais to Help Govt. Fight Muslim Unrest BANGKOK (Reuters) - Revered Queen Sirikit has urged all Thais to work with the government in its fight against the violence in the largely Muslim south, where almost 500 people have been killed since January.	1	queen urges thais govt fight muslim unrest bangkok reuters revered queen sirikit urged thais government fight violence muslim south people killed january	1	0	1	3	4	4	5	7	2	7	6	4	5	0	0	9	9	7	4
Indian-Americans hail Manmohan speechNew York, Sep 27 (UNI) Members of the Indian-American community who attended a public meeting addressed by Prime Minister Manmohan Singh welcomed his speech and expressed confidence that India would soon be a developed economy.	1	hail manmohan speechnew york sep uni community attended public meeting addressed prime minister manmohan singh welcomed speech expressed confidence india developed economy	1	0	1	4	1	0	6	6	0	4	0	11	5	0	0	9	13	7	4
Cricket: NZ suffer Franklin blowNew Zealand bowler James Franklin misses the first Test against Australia with injury.	1	cricket nz suffer franklin blownew zealand bowler james franklin misses test australia injury	0	2	2	0	2	1	2	1	3	2	4	1	10	12	2	2	16	4	15
Strong Earthquake Strikes Central Calif.PARKFIELD, Calif. - A strong earthquake struck Central California on Tuesday that was felt from San Francisco to the Los Angeles area...	1	strong earthquake strikes central strong earthquake struck central california tuesday san francisco los angeles	0	2	2	3	4	4	5	7	2	7	6	4	4	11	7	5	9	3	3
North Korea Resists Talks on Nuclear ArmsNorth Korea said Monday that it will not resume talks on its nuclear weapons program until the Bush administration ends its quot;hostile policy quot; against Pyongyang and	1	north korea resists talks nuclear armsnorth korea monday resume talks nuclear weapons program bush administration quot hostile policy quot pyongyang	1	0	1	4	1	0	6	6	0	4	0	11	5	0	0	9	13	7	4
Blair readies crucial party speech under Iraq cloudBritain #39;s Tony Blair faces one of the trickiest speeches of his career today, seeking to win back his Labour party after rifts over Iraq and spell out new policies to set up next year #39;s re-election bid.	1	blair readies crucial party speech iraq cloudbritain tony blair trickiest speeches career seeking win labour party rifts iraq spell policies set bid	1	0	1	4	1	0	6	6	0	4	0	11	0	14	13	15	0	14	7
We have to learn to be patient on Indian pitches: Smith (AFP)AFP - South African skipper Graeme Smith said his team had to learn to be patient on slow pitches if they hoped to do well in an upcoming two-Test series against India.	1	learn patient indian pitches smith afp afp south african skipper graeme smith team learn patient slow pitches hoped upcoming series india	0	2	2	0	2	2	1	5	5	3	3	3	5	0	0	9	13	7	4
Some Democrats Believe the Party Should Get ReligionBested by a Republican campaign emphasizing Christian faith, some Democrats are stepping up efforts to organize the "religious left."	1	democrats party religionbested republican campaign emphasizing christian faith democrats stepping efforts organize religious left	1	0	1	4	1	0	6	6	0	4	0	11	0	14	13	8	0	14	7
Russia working on new nuclear weapons: PutinMOSCOW - New nuclear weapons systems being developed in Russia could include a missile designed to defeat the US missile defence shield.	1	russia nuclear weapons putinmoscow nuclear weapons systems developed russia missile designed defeat missile defence shield	1	0	1	4	1	0	6	6	0	4	0	11	5	0	0	9	13	7	4
Australia comdemns apparent killing of aid worker in IraqAustralia #39;s Foreign Minister, Alexander Downer, says the apparent murder in Iraq of aid worker, Margaret Hassan, is a heinous and inexcusable crime.	1	australia comdemns apparent killing aid worker iraqaustralia foreign minister alexander downer apparent murder iraq aid worker margaret hassan heinous inexcusable crime	1	0	1	3	4	4	5	7	2	7	8	5	12	7	9	15	6	15	8
Taiwan FM apologises for #39;rude words #39; against SingaporeTAIPEI (dpa) - Taiwan Foreign Minister Mark Chen apologised to Singapore on Tuesday over the words he used in describing the Southeast Asian city-state.	1	taiwan fm apologises rude singaporetaipei dpa taiwan foreign minister mark chen apologised singapore tuesday describing southeast asian	1	0	1	4	1	0	6	6	0	4	0	11	5	0	0	9	13	7	4
Sports Court Hears Hamm Gold Medal AppealLAUSANNE, Switzerland - Paul Hamm appeared before the sports world's highest court Monday to argue why he should he keep his Olympic gymnastics gold medal. The Court of Arbitration for Sport convened to hear the appeal from a South Korean gymnast who believes he was unfairly deprived of the gold in the men's all-around event in Athens last month because of…	1	sports court hears hamm gold medal appeallausanne switzerland paul hamm appeared sports court monday argue olympic gymnastics gold medal court arbitration sport convened hear appeal south korean gymnast believes unfairly deprived gold event athens month scoring error	0	2	2	0	2	1	2	1	4	1	2	10	2	9	3	12	2	2	5
Greek School Bus Crash Kills Seven, Injures 24 KAMMENA VOURLA, Greece (Reuters) - A bus carrying school students and teachers to the Athens Paralympic Games collided with a truck in central Greece on Monday killing at least seven people and injuring 24, officials said.	1	greek school bus crash kills injures kammena vourla greece reuters bus carrying school students teachers athens paralympic games collided truck central greece monday killing people injuring officials	1	0	1	3	4	4	5	7	2	7	6	4	4	7	7	5	9	3	3
Haitian storm survivors give thanksAmid the destruction from Tropical Storm Jeanne, Haitians have prayed for the 1,500 dead and given thanks that their lives were spared at services on Sunday.	1	haitian storm survivors thanksamid destruction tropical storm jeanne haitians prayed dead lives spared services sunday	1	0	1	3	4	4	5	7	2	7	6	4	4	11	12	5	9	12	11
China sets terms for Taiwan talksChina is ready to resume negotiations after nearly five years with Taiwan if the island nation accepts the quot;one China quot; principle, the state media reported Monday.	1	china sets terms taiwan talkschina ready resume negotiations taiwan island nation accepts quot china quot principle media reported monday	1	0	1	4	1	0	6	6	0	4	0	11	5	0	0	9	13	7	4
Australian train crash injures scoresA high-speed passenger train carrying more than 160 people jumped the rails and crashed in eastern Australia, injuring most of those on board, officials said.	1	australian train crash injures scoresa passenger train carrying people jumped rails crashed eastern australia injuring board officials	1	0	1	3	4	4	5	7	2	7	6	4	4	7	7	5	9	3	3
Blair builds Atlantic bridgeTony Blair last night put worldwide political and human rights at the centre of his hopes to revitalise the United Nations and bring the United States and Europe closer together again in pursuit of global democracy.	1	blair builds atlantic bridgetony blair night worldwide political human rights centre hopes revitalise united nations bring united europe closer pursuit global democracy	1	0	1	4	1	0	6	6	0	4	0	11	5	0	0	9	13	7	4
Rebels Attack in Central Iraq and the NorthA rebel counteroffensive swept through central and northern Iraq on Monday as American troops struggled to flush the remaining insurgents from the rubble-strewn streets of Falluja.	1	rebels attack central iraq northa rebel counteroffensive swept central northern iraq monday american troops struggled flush remaining insurgents streets falluja	1	0	1	3	4	4	5	7	2	7	6	4	4	7	10	15	9	17	8
Labour delegates force Iraq voteIraq is chosen for a vote at Labour conference but Tony Blair says he will not apologise for the war.	1	labour delegates force iraq voteiraq chosen vote labour conference tony blair apologise war	1	0	1	4	1	0	6	6	0	4	0	11	0	14	13	8	0	14	7
Israel sends Syria tough message with Hamas strikeWidening its pursuit of Hamas beyond the occupied territories, Israel reached into Damascus Sunday, dealing a blow to both Hamas and Syria.	1	israel sends syria tough message hamas strikewidening pursuit hamas occupied territories israel reached damascus sunday dealing blow hamas syria	1	0	1	3	4	0	6	6	0	4	6	4	4	0	7	3	4	10	3
UN refugee chief sees Darfur autonomy as way out of crisisNDJAMENA : UN High Commissioner for Refugees Ruud Lubbers said that Sudan should grant more autonomy to Darfur as he began a visit to address the crisis over the exodus of more than 1.4 million refugees from the troubled region.	1	refugee chief darfur autonomy crisisndjamena commissioner refugees ruud lubbers sudan grant autonomy darfur visit address crisis exodus refugees troubled region	1	0	1	3	4	0	6	6	0	4	0	11	5	0	0	9	13	7	4
Pinochet questioned by investigative judgeAn investigative judge has questioned former Chilean dictator Augusto Pinochet for half an hour to decide whether to indict him in one of hundreds of human rights cases stemming from his 1973-1990 rule.	1	pinochet questioned investigative judgean investigative judge questioned chilean dictator augusto pinochet half hour decide indict hundreds human rights stemming rule	1	0	1	4	1	5	3	2	1	0	8	8	7	8	11	13	6	15	10
Karzai Travels North on First Domestic Trip Since Rocket AttackAfghan President Hamid Karzai Sunday made his first domestic trip outside the capital, Kabul, since a trip cut short by a rocket attack 10 days ago.	1	karzai travels north domestic trip rocket attackafghan president hamid karzai sunday domestic trip capital kabul trip cut short rocket attack days ago	1	0	1	3	4	4	5	7	2	7	6	4	0	14	13	8	0	14	7
Britain extends citizenship rights to Gurkha soldiers (AFP)AFP - Britain has extended full citizenship rights to Gurkha soldiers from Nepal who serve in the British armed forces, Prime Minister Tony Blair has said.	1	britain extends citizenship rights gurkha soldiers afp afp britain extended citizenship rights gurkha soldiers nepal serve british armed forces prime minister tony blair	1	0	1	3	4	4	5	7	2	7	8	5	12	7	9	15	6	17	8
Fini named Italy foreign ministerThe leader of Italy's right-wing National Alliance, Gianfranco Fini, is appointed foreign minister.	1	fini named italy foreign ministerthe leader italy national alliance gianfranco fini appointed foreign minister	1	0	1	4	1	0	6	6	0	4	0	11	5	0	0	9	13	7	4
Half of men on Pitcairn Island on trial for alleged sex abusea small, prefabricated affair, consisting of just six cells. They have an incentive to build it well: seven of them could soon be living there.	1	half pitcairn island trial alleged sex abusea prefabricated affair consisting cells incentive build living	1	0	1	4	1	5	3	2	1	0	8	8	7	8	11	13	6	15	10
Timing Of Indian Move In Kashmir Vital: Pak PaperIslamabad, Nov. 16 (NNN): Pakistans leading newspaper, Dawn, finds the timing of the Indian announcement on reduction of troops in Kashmir as significance.	1	timing indian move kashmir vital pak paperislamabad nnn pakistans leading newspaper dawn timing indian announcement reduction troops kashmir significance	1	0	1	3	4	0	6	6	0	4	6	11	5	0	0	9	13	7	4
No progress in N.Korea, Japan talks on abductees: Talks between Japan and North Korea aimed at resolving a dispute over Japanese nationals abducted by the North decades ago ended Sunday without progress, Japanese officials said.	1	progress japan talks abductees talks japan north korea aimed resolving dispute japanese nationals abducted north decades ago sunday progress japanese officials	1	0	1	4	1	0	6	6	0	4	0	11	5	0	0	9	13	7	4
Microsoft open new software development unit in India (AFP)AFP - Microsoft said it will join with India's second-largest software firm, Infosys Technologies, to provide software and consulting to manufacturing, banking and automobile companies.	1	microsoft software development unit india afp afp microsoft join india software firm infosys technologies provide software consulting manufacturing banking automobile companies	0	1	0	1	3	3	7	3	6	6	5	6	13	5	5	14	7	6	6
Riyadh says killing of Frenchman was "terrorist attack" (AFP)AFP - A French national shot dead in the Saudi Red Sea city of Jeddah overnight was the target of a quot;terrorist attack quot; according to initial investigations, an interior ministry spokesman told AFP.	1	riyadh killing frenchman terrorist attack afp afp french national shot dead saudi red sea city jeddah overnight target quot terrorist attack quot initial investigations interior ministry spokesman told afp	1	0	1	3	4	4	5	7	2	7	6	4	4	7	7	5	9	3	3
AFP Interview: UN refugee chief says Sudan likely to grant Darfur &lt;b&gt;...&lt;/b&gt;ABECHE, Chad, Sept 26 (AFP) -- The Sudanese government has seen the writing on the wall and is likely to grant some autonomy to the violence-wracked Darfur region but the rebels should now do their bit to end the world #39;s worst humanitarian crisis, UN High	1	afp interview refugee chief sudan grant darfur lt gt lt gt abeche chad sept afp sudanese government writing wall grant autonomy darfur region rebels bit worst humanitarian crisis	1	0	1	3	4	0	6	6	0	4	0	11	5	0	0	9	13	7	4
Muslim Council joins fight for hostage #39;s lifeEfforts to secure the release of Iraq hostage Ken Bigley are being stepped up as a delegation from the Muslim Council of Britain #39; heads to Baghdad for talks.	1	muslim council joins fight hostage lifeefforts secure release iraq hostage ken bigley stepped delegation muslim council britain heads baghdad talks	1	0	1	3	4	4	5	7	2	7	8	5	12	7	9	15	6	17	8
France #39;s #39;Watergate #39; trial opensIn France, 12 people have gone on trial for running a phone-tapping operation used by the late President Francois Mitterrand to monitor his opponents.	1	france watergate trial opensin france people trial running operation late president francois mitterrand monitor opponents	1	0	1	4	1	4	3	2	2	7	8	8	7	8	11	13	6	15	10
Wounded troops detail fierce fightLANDSTUHL, Germany - Four US servicemen wounded last week in the Iraqi city of Fallujah on Monday described intense fighting with a skilled enemy, adept at markmanship and rigging booby traps.	1	wounded troops detail fierce fightlandstuhl germany servicemen wounded week iraqi city fallujah monday intense fighting skilled enemy adept markmanship rigging booby traps	1	0	1	3	4	4	5	7	2	7	6	4	12	7	10	15	9	17	8
UN chief promises more staff to Iraq when possibleUN Secretary-General Kofi An nan meets with visiting Iraqi Prime Minister Iyad Allawi at UN headquarters in New York, Sep 24. (Xinhua Photo).	1	chief promises staff iraq possibleun kofi nan meets visiting iraqi prime minister iyad allawi headquarters york sep xinhua photo	1	0	1	3	4	0	6	6	0	4	0	5	12	0	9	15	6	7	8
How long will the pop press stomach the horrors of Iraq?The sickening accounts of the ordeal of Ken Bigley have brought home to everyone the true wretchedness of the present situation in Iraq.	1	pop press stomach horrors iraq sickening accounts ordeal ken bigley brought true wretchedness situation iraq	1	0	1	3	4	4	5	7	2	7	8	5	12	7	9	15	6	17	8
Australian PM fails to apologize on wrong pre-war intelligence on &lt;b&gt;...&lt;/b&gt;Australian Prime Minister John Howard said Thursday he won #39;t automatically follow his British counterpart Tony Blair who has said he could apologize for faulty evidence on Iraqi weapons of mass destruction.	1	australian pm fails apologize wrong intelligence lt gt lt gt australian prime minister john howard thursday won automatically follow british counterpart tony blair apologize faulty evidence iraqi weapons mass destruction	1	0	1	4	1	0	6	6	0	4	0	11	0	14	9	8	6	15	7
Italy and Libya move on migrantsItaly's Interior Minister visits Libya to pave the way for joint efforts to curb illegal immigration into the EU.	1	italy libya move migrantsitaly interior minister visits libya pave joint efforts curb illegal immigration eu	1	0	1	4	1	0	6	6	0	4	0	11	5	0	0	9	13	7	4
UN Council Votes Ivory Coast Arms Embargo (Reuters)Reuters - The U.N. Security Council on\Monday imposed an immediate arms embargo on Ivory Coast and\voted to punish key government and rebel leaders with\additional sanctions next month.	1	council votes ivory coast arms embargo reuters reuters security council imposed arms embargo ivory coast punish key government rebel leaders sanctions month	1	0	1	4	1	0	6	6	0	4	0	11	5	0	0	9	13	7	4
Greenland criminals take road back to society, not prison (AFP)AFP - Some 20 people gather for a lunch of whale meat and potatoes inside a large wooden building facing a frozen fjord bathed in sunlight. No, these are not tourists on vacation, but rather criminals serving time in one of Greenland's open penal centers.	1	greenland criminals road society prison afp afp people gather lunch whale meat potatoes inside wooden building facing frozen fjord bathed sunlight tourists vacation criminals serving time greenland penal centers	1	0	1	3	4	4	5	7	2	7	8	5	8	8	4	13	6	15	10
Car Crashes Into Japan Parliament Gate -Jiji (Reuters)Reuters - A car crashed into a gate of Japan's\parliament building in central Tokyo on Thursday and caught\fire, Jiji news agency said.	1	car crashes japan parliament gate reuters reuters car crashed gate building central tokyo thursday jiji news agency	1	0	1	3	4	4	5	7	2	7	6	4	4	7	7	5	9	3	3
Four held in anti-terror raidsThree of the men were seized in a quot;pre-planned quot; operation by officers from the Metropolitan Police anti-terrorist branch at a hotel in Brent Cross, north London.	1	held raidsthree seized quot quot operation officers metropolitan police branch hotel brent cross north london	1	0	1	3	4	4	5	7	2	7	8	5	12	7	9	13	6	15	3
Poor? Who #39;s poor? Poverty is downThe proportion of people living on less than \$1 a day decreased from 40 to 21 per cent of the global population between 1981 and 2001, says the World Bank #39;s latest annual report.	1	poor poor poverty downthe proportion people living day decreased cent global population bank annual report	0	1	3	2	0	6	4	8	9	10	11	12	11	2	6	10	10	18	16
Typhoon Meari kills nine in Japanmoving northeast over large parts of the country including Tokyo, with winds up to 67 miles per hour. Media reports said at least nine had died, but public broadcaster NHK said the toll had reached 11.	1	typhoon meari kills japanmoving northeast country including tokyo winds miles hour media reports died public broadcaster nhk toll reached	1	0	1	3	5	4	5	7	2	7	6	4	4	11	12	5	9	12	11
Swimmer, 77, believed killed in shark attackCAPE TOWN -- A great white shark estimated to be at least 18 feet long attacked and presumably killed an elderly South African woman yesterday off a beach near Cape Town, officials said. Tyna Webb, 77, who lived in the area, was swimming off Sunny Cove in Fish Hoek when the massive shark circled her and then attacked, witnesses and ...	1	swimmer believed killed shark attackcape town white shark estimated feet attacked killed elderly south african woman yesterday beach cape town officials tyna webb lived swimming sunny cove fish hoek massive shark circled attacked witnesses	1	0	1	3	4	4	5	7	2	7	6	4	4	7	7	5	9	3	3
Mbeki calls for arms embargo, rebels vow to fightPresident Thabo Mbeki has urged all countries, including Ivory Coast #39;s neighbours, to immediately enforce a United Nations arms embargo on government and rebel forces in Ivory Coast.	1	mbeki calls arms embargo rebels vow fightpresident thabo mbeki urged countries including ivory coast neighbours enforce united nations arms embargo government rebel forces ivory coast	1	0	1	3	4	0	6	6	0	4	0	11	5	0	0	9	13	7	4
Japan snubs Russian proposal, says it wants all disputed Kuril &lt;b&gt;...&lt;/b&gt;TOKYO: Japan said it wanted Russia to return all four Kuril islands, snubbing Moscow #39;s renewed talk of returning two of them to end the dispute that has prevented the countries from formally ending World War II.	1	japan snubs russian proposal disputed kuril lt gt lt gt tokyo japan russia return kuril islands snubbing moscow renewed talk returning dispute prevented countries formally war ii	1	0	1	4	1	0	6	6	0	4	0	11	5	0	0	9	13	7	4
India desperate for jobs, infrastructure despite economic boom (AFP)AFP - Despite India's economic boom in software and outsourcing services, economists have warned the government needs more reforms to create jobs in manufacturing to cut poverty.	1	india desperate jobs infrastructure economic boom afp afp india economic boom software outsourcing services economists warned government reforms create jobs manufacturing cut poverty	0	1	3	2	0	6	4	8	9	10	11	12	11	3	6	16	17	18	12
Australia, US seal free trade agreement (AFP)AFP - Australia and the United States sealed a free trade agreement to start January 1, 2005 after clearing last-minute obstacles.	1	australia seal free trade agreement afp afp australia united sealed free trade agreement start january clearing obstacles	0	0	1	4	1	0	6	6	0	4	0	11	5	0	0	9	13	7	4
Dutch mulling limits on freedom of expressionMany Dutch decision-makers wondering whether reactions, particularly criticism of Muslims, did not go too far. By Isabelle Wesselingh - THE HAGUE.	1	dutch mulling limits freedom expressionmany dutch wondering reactions criticism muslims isabelle wesselingh hague	1	0	1	3	4	4	3	2	2	7	8	5	12	8	11	13	6	15	10
Israeli tank reportedly kills Egyptian troopsAn Israeli tank has opened fire and killed three Egyptian troops on the sensitive border between the two countries, mistaking them for Palestinian militants on the way to carry out an attack, Israeli media says.	1	israeli tank reportedly kills egyptian troopsan israeli tank fire killed egyptian troops sensitive border countries mistaking palestinian militants carry attack israeli media	1	0	1	3	4	4	5	7	2	7	6	4	4	7	7	3	4	10	3
PM backs indigenous alcohol banCURFEWS and alcohol bans may be necessary in Aboriginal communities, Prime Minister John Howard said today, adding that civil liberties were less important than staying alive.	1	pm indigenous alcohol bancurfews alcohol bans aboriginal communities prime minister john howard adding civil liberties staying alive	1	0	1	4	1	0	6	6	0	4	0	11	0	14	13	8	0	14	7
Cricket: Dubai global academyThe International Cricket Council are to open a global cricket academy designed to improve standards of lesser nations.	1	cricket dubai global academythe international cricket council global cricket academy designed improve standards lesser nations	0	1	1	4	1	0	6	6	0	4	0	11	5	0	0	9	13	7	4
European Press Review: Climate ChangeEuropean editorials on Monday commented on the results of the local elections in the western German state of North Rhine-Westphalia.	1	european press review climate changeeuropean editorials monday commented local elections western german north	1	0	1	4	1	0	6	6	0	4	0	11	5	0	0	9	13	7	4
Report: Israeli army mistakenly kills three Egyptian soldiersJERUSALEM A preliminary Israeli army investigation has found that Israeli troops apparently killed three Egyptian soldiers by mistake, thinking they were Palestinian militants along the Gaza-Egypt border.	1	report israeli army mistakenly kills egyptian soldiersjerusalem preliminary israeli army investigation israeli troops killed egyptian soldiers mistake thinking palestinian militants border	1	0	1	3	4	4	5	7	2	7	6	4	4	7	7	3	4	10	3
No-Confidence Vote Planned Against Palestinian PM RAMALLAH, West Bank (Reuters) - Lawmakers angered by the Palestinian leadership's failure to make reforms plan to force a parliamentary no-confidence vote that could bring down the government appointed by Yasser Arafat, legislators said.	1	vote planned palestinian pm ramallah west bank reuters lawmakers angered palestinian leadership failure reforms plan force parliamentary vote bring government appointed yasser arafat legislators	1	0	1	4	1	0	6	6	0	4	0	11	0	14	13	3	4	10	7
Israeli tank kills three Egyptian troopsAn Israeli tank has opened fire and killed three Egyptian troops in a border zone near the Gaza Strip after mistaking them for Palestinian arms smugglers, Israeli security sources say.	1	israeli tank kills egyptian troopsan israeli tank fire killed egyptian troops border zone gaza strip mistaking palestinian arms smugglers israeli security sources	1	0	1	3	4	4	5	7	2	7	6	4	4	7	7	3	4	10	3
Three Egyptian policemen killed by Israeli tank fire near border (AFP)AFP - Three Egyptian policemen were killed overnight by Israeli tank fire on the tense border between Egypt and the Gaza Strip when they were mistaken for Palestinian arms smugglers, officials said.	1	egyptian policemen killed israeli tank fire border afp afp egyptian policemen killed overnight israeli tank fire tense border egypt gaza strip mistaken palestinian arms smugglers officials	1	0	1	3	4	4	5	7	2	7	6	4	4	7	7	3	4	10	3
DEBKAfile Special AnalysisBefore deporting him to Lebanon in 1991, the late Yitzhak Rabin called Ezz-Eldin Sheikh al-Khalil the snakes head, singling him out as the terror master who raised and handled Hamas most accomplished terror operatives, Adnan al Hool and	1	debkafile special analysisbefore deporting lebanon late yitzhak rabin called sheikh snakes head singling terror master raised handled hamas accomplished terror operatives adnan al hool	1	0	1	4	1	0	6	6	0	4	8	5	12	0	9	13	6	15	10
Putin backs veto for members of expanded Security CouncilRussian President Vladimir Putin yesterday rejected a key recommendation of a United Nations panel on expanding the UN Security Council, saying any reform would be one-sided if new members did not have veto power.	1	putin veto expanded security councilrussian president vladimir putin yesterday rejected key recommendation united nations panel expanding security council reform veto power	1	0	1	4	1	0	6	6	0	4	0	11	5	0	0	9	13	7	4
Ivory Coast Leader's Camp Criticizes Arms Ban ABIDJAN (Reuters) - Supporters of Ivory Coast's President Laurent Gbagbo criticized on Tuesday a United Nations decision to impose an arms embargo on the world's top cocoa grower but rebel leaders welcomed the move.	1	ivory coast leader camp criticizes arms ban abidjan reuters supporters ivory coast president laurent gbagbo criticized tuesday united nations decision impose arms embargo top cocoa grower rebel leaders welcomed move	1	0	1	4	1	0	6	6	0	4	0	11	5	0	0	9	13	7	4
U.S. Asks Laos to Check Massacre Report (AP)AP - The State Department said Monday it is taking seriously allegations that Laotian military forces may have massacred children of the country's Hmong ethnic minority.	1	laos check massacre report ap ap department monday allegations laotian military forces massacred children country hmong ethnic minority	1	0	1	3	4	4	3	2	2	7	8	8	7	7	11	13	9	17	10
Diverted London Airliner Given All-ClearA police search concluded there was no threat to a New York-bound Greek airliner forced to make an emergency landing in Britain following a bomb threat that mentioned Iraq, officers said Monday.	1	diverted london airliner police search concluded threat greek airliner forced emergency landing britain bomb threat mentioned iraq officers monday	1	0	1	3	4	4	5	7	2	7	6	5	4	7	7	5	9	3	3
UN divided over Darfur measuresOn the eve of a high-profile UN Security Council visit to Nairobi, members are split over a draft resolution on atrocities in Sudan #39;s western Darfur region.	1	divided darfur measureson eve security council visit nairobi split draft resolution atrocities sudan western darfur region	1	0	1	4	1	0	6	6	0	4	0	11	5	0	0	9	13	7	4
Iran deploys new missileTEHRAN: Iran added one more missile to its military arsenal and the defense minister said Saturday his country was ready to confront any external threat.	1	iran deploys missiletehran iran missile military arsenal defense minister saturday country ready confront external threat	1	0	1	4	1	0	6	6	0	4	0	11	5	0	0	9	13	7	4
Jet lands in UK after bomb alertAn Olympic Airlines flight on its way from Athens to New York is diverted to Stansted Airport after a security alert.	1	jet lands uk bomb alertan olympic airlines flight athens york diverted stansted airport security alert	1	0	1	3	5	1	5	1	4	1	2	10	2	6	3	4	2	2	18
U.S. Military Arrests an Iraqi CommanderThe arrest of a commander of the Iraqi National Guard raises concerns about the loyalty and reliability of the new security forces.	1	military arrests iraqi commanderthe arrest commander iraqi national guard raises concerns loyalty reliability security forces	1	0	1	3	4	4	5	7	2	7	8	5	12	7	10	15	6	17	8
Hungary's Parliament Elects Prime Minister (AP)AP - Parliament on Wednesday elected one of Hungary's wealthiest businessmen as prime minister, ending two months of political uncertainty.	1	hungary parliament elects prime minister ap ap parliament wednesday elected hungary wealthiest businessmen prime minister months political uncertainty	1	0	1	4	1	0	6	6	0	4	0	11	0	14	13	3	4	10	7
U.S. Wants to Lease Swedish Submarine (AP)AP - The United States wants to lease a Swedish attack submarine for naval exercises in the Baltic Sea in a deal possibly worth tens of millions of dollars, defense officials said Sunday.	1	lease swedish submarine ap ap united lease swedish attack submarine naval exercises baltic sea deal worth tens millions dollars defense officials sunday	1	0	1	3	4	4	5	7	8	8	6	4	4	11	15	5	9	3	0
Japan Ministers Resign Ahead of Reshuffle TOKYO (Reuters) - Japanese cabinet ministers tendered their resignations on Monday, setting the stage for Prime Minister Junichiro Koizumi to make new appointments aimed at boosting his popularity and tightening his grip on power after a set-back in July's upper house elections.	1	japan ministers resign ahead reshuffle tokyo reuters japanese cabinet ministers tendered resignations monday setting stage prime minister junichiro koizumi appointments aimed boosting popularity tightening grip power july upper house elections	1	0	1	4	1	0	6	6	0	4	0	11	5	0	0	3	4	10	4
Men, Women More Different Than ThoughtCHICAGO - Beyond the tired cliches and sperm-and-egg basics taught in grade school science class, researchers are discovering that men and women are even more different than anyone realized. It turns out that major illnesses like heart disease and lung cancer are influenced by gender and that perhaps treatments for women ought to be slightly different from th…	1	women thoughtchicago tired cliches basics taught grade school science class researchers discovering women realized major illnesses heart disease lung cancer influenced gender treatments women approach	1	0	1	0	5	1	3	2	8	8	1	0	8	2	4	10	10	13	16
Russia seeks island conflict resolutionRussia has begun making overtures to Japan to end a 48-year-old territorial dispute over the Southern Kurile Islands, the Novosti news agency said Monday.	1	russia seeks island conflict resolutionrussia begun overtures japan territorial dispute southern kurile islands novosti news agency monday	1	0	1	4	1	0	6	6	0	4	0	11	5	0	0	9	13	7	4
Pakistan #39;s top wanted terrorist killedPakistani security forces Sunday killed the country #39;s most wanted terrorist allegedly involved in an assassination attempt on President Pervez Musharrafand indicted in the murder of a US journalist.	1	pakistan top terrorist killedpakistani security forces sunday killed country terrorist allegedly involved assassination attempt president pervez musharrafand indicted murder journalist	1	0	1	3	4	4	5	7	2	7	8	5	12	7	9	13	6	15	3
Pakistan al-Qaeda suspect killedPakistan says it has dealt a major blow to al-Qaeda #39;s operations after its security forces shot dead the country #39;s most wanted terror suspect.	1	pakistan suspect killedpakistan dealt major blow operations security forces shot dead country terror suspect	1	0	1	3	4	4	5	7	2	7	6	4	4	7	7	5	9	3	3
Powell Announces His ResignationSecretary of State Colin L. Powell announced his resignation Monday, ending four years of battles with Vice President Cheney and Defense Secretary Donald H. Rumsfeld over the course of U.S. foreign policy.	1	powell announces resignationsecretary colin powell announced resignation monday battles vice president cheney defense secretary donald rumsfeld foreign policy	1	0	1	4	1	0	6	6	0	4	0	11	5	0	0	8	0	7	4
Press blame Right for swaying citizenship votesOn Sunday voters rejected government-backed plans to simplify naturalisation procedures for second-generation foreigners. They also turned down a proposal to grant children born in Switzerland to foreign parents the automatic right to a Swiss passport.	1	press blame swaying citizenship voteson sunday voters rejected plans simplify naturalisation procedures foreigners proposal grant children born switzerland foreign parents automatic swiss passport	1	0	1	4	1	0	6	6	0	4	0	11	5	0	0	9	13	7	4
Experts dampen bird flu fearsInternational health officials at an emergency meeting in Bangkok Monday said there is no evidence that bird flu has been passed from one human to another.	1	experts dampen bird flu fearsinternational health officials emergency meeting bangkok monday evidence bird flu passed human	1	0	1	4	5	0	3	6	8	8	1	0	5	2	0	10	10	7	16
Hamas official killed in blastJERUSALEM -- A Hamas official was killed Sunday when his sport utility vehicle exploded in a neighborhood of Damascus, Syria, seconds after he started the engine, according to witnesses and the Palestinian militant group #39;s leaders, who accused Israel of	1	hamas official killed blastjerusalem hamas official killed sunday sport utility vehicle exploded neighborhood damascus syria started engine witnesses palestinian militant leaders accused israel	1	0	1	3	4	4	5	7	2	7	6	4	4	7	7	3	4	10	3
MITTERAND PHONE-TAP TRIAL OPENSProceedings are due to begin on a case that has scandalised France for over two decades. Twelve Mitterand-era government officials and senior police officers will face trial in Paris for running a phone tapping	1	mitterand trial opensproceedings scandalised france decades twelve government officials senior police officers trial paris running phone tapping	1	0	1	3	4	4	3	2	2	7	8	8	7	8	11	13	6	15	10
US, Iraqi Forces in New Push to Retake Rebel ZoneUS and Iraqi forces pushed on with their second major offensive in a week Wednesday, hunting insurgents in a triangle southwest of Baghdad that has become one of Iraq #39;s most notorious hot spots.	1	iraqi forces push retake rebel zoneus iraqi forces pushed major offensive week wednesday hunting insurgents triangle southwest baghdad iraq notorious hot spots	1	0	1	3	4	4	5	7	2	7	6	5	12	7	10	15	9	17	8
Ukraine opposition seeks legal changesKIEV -- Opposition leader Viktor Yushchenko yesterday pressed for the prime minister's removal from office, dismissal of electoral officials, and new legislation to guard against fraud in a new presidential runoff, warning that his supporters would continue to blockade government offices until outgoing President Leonid D. Kuchma meets those demands.	1	ukraine opposition seeks legal changeskiev opposition leader viktor yushchenko yesterday pressed prime minister removal office dismissal electoral officials legislation guard fraud presidential runoff warning supporters continue blockade government offices outgoing president leonid kuchma meets demands	1	0	1	4	1	0	6	6	0	4	0	11	0	14	13	8	0	14	7
Violent Protests Erupt Again in HaitiPORT-AU-PRINCE, Haiti Oct. 2, 2004 - Supporters of ousted President Jean-Bertrand Aristide took to the streets of Haiti #39;s capital for a second day, shooting wildly, smashing cars and blocking roads with burning tires.	1	violent protests erupt haiti supporters ousted president aristide streets haiti capital day shooting wildly smashing cars blocking roads burning tires	1	0	1	3	4	4	5	7	2	7	6	4	4	7	10	5	9	17	3
UN Council Poised to Vote on Darfur Resolution UNITED NATIONS (Reuters) - The United States and China held last-minute talks on Saturday before the U.N. Security Council was to vote on a resolution that would consider oil sanctions against Sudan if it did not stop atrocities in the Darfur region.	1	council poised vote darfur resolution united nations reuters united china held talks saturday security council vote resolution oil sanctions sudan atrocities darfur region	1	0	1	4	1	0	6	6	0	4	0	11	5	0	0	9	13	7	4
Pakistan tightens noose around Al-Qaeda militants near Afghan border: army (AFP)AFP - Pakistani troops have hemmed in Al-Qaeda-linked foreign fighters and their local allies hiding in tribal border regions with a series of military assaults, a top Pakistani general said.	1	pakistan tightens noose militants afghan border army afp afp pakistani troops hemmed foreign fighters local allies hiding tribal border regions series military assaults top pakistani	1	0	1	3	4	4	5	7	2	7	6	5	12	7	7	15	9	3	3
Sharon cautious on reopening talksThe Israeli prime minister, Ariel Sharon, yesterday said the death of his long-time rival, Yasser Arafat, could prove to be quot;a historic turning point in the Middle East quot;.	1	sharon cautious reopening talksthe israeli prime minister ariel sharon yesterday death rival yasser arafat prove quot historic middle east quot	1	0	1	4	1	0	6	6	0	4	0	11	0	14	0	3	4	10	4
Strong Quake Hits Indonesian Island, Kills Six JAKARTA (Reuters) - An earthquake measuring 6.0 on the Richter scale shook an island in eastern Indonesia on Friday, killing six people and injuring at least six more, a government official said.	1	strong quake hits indonesian island kills jakarta reuters earthquake measuring richter scale shook island eastern indonesia friday killing people injuring government official	1	0	1	3	4	4	5	7	2	7	6	4	4	7	7	5	9	3	3
Gordon Cooper, NASA Mercury Pioneer, DiesLOS ANGELES - Gordon Cooper, who was the youngest and perhaps cockiest member of the original Mercury astronauts and set the space endurance record that helped clear the way for the first moon landing, has died. He was 77...	1	gordon cooper nasa mercury pioneer dieslos angeles gordon cooper cockiest original mercury astronauts set space endurance record helped moon landing died	0	2	2	0	5	1	2	1	8	8	1	0	8	6	4	4	15	0	17
Iran Is Criticized for Its Lack of Candor on Nuclear ProgramThe International Atomic Energy's 35-nation board of governors passed a resolution calling for the country to suspend all uranium enrichment activities that could contribute to producing fuel for a nuclear bomb.	1	iran criticized lack candor nuclear programthe international atomic energy board governors passed resolution calling country suspend uranium enrichment activities contribute producing fuel nuclear bomb	1	0	1	4	1	0	6	6	0	4	0	11	5	0	0	9	13	7	4
Macaulay Culkin Released After Drug ArrestOKLAHOMA CITY - Former child star Macaulay Culkin was arrested on drug charges Friday during a traffic stop, authorities said. The 24-year-old actor, best known for his role in the "Home Alone" movies, was taken into custody on complaints of possession of a controlled dangerous substance without a valid prescription and possession of marijuana, according …	1	macaulay culkin released drug arrestoklahoma city child star macaulay culkin arrested drug charges friday traffic authorities actor role movies custody complaints possession controlled dangerous substance valid prescription possession marijuana oklahoma county sheriff office	1	0	1	4	1	5	3	2	1	0	8	8	7	2	11	10	10	13	16
Bush Seen Vulnerable to Kerry Among Independent Voters (Reuters)Reuters - President Bush, who holds\a sizable lead in some polls, still appears to be vulnerable to\Democrat John Kerry among independent voters whose shifting\loyalties could determine the winner of the November election,\pollsters say.	1	bush vulnerable kerry independent voters reuters reuters president bush sizable lead polls appears vulnerable john kerry independent voters determine winner november election	1	0	1	4	1	0	6	6	0	4	0	11	0	14	13	8	0	14	7
Russia: the losing battle against terrorism and insurgencyTerrorism in Russia took on horrifying proportions in August and early September when more than 400 people were killed in four separate incidents in a span of less than two weeks.	1	russia losing battle terrorism insurgencyterrorism russia horrifying proportions august september people killed separate incidents span weeks	1	0	1	3	4	4	5	7	2	7	6	4	4	7	7	5	9	3	3
Leader Says Rebels Responsible for SiegeMOSCOW Sept. 17, 2004 - Chechen rebel leader Shamil Basayev purportedly took responsibility Friday for a bloody school siege and other recent terrorist attacks that have killed more than 430 people, but	1	leader rebels responsible siegemoscow chechen rebel leader shamil basayev purportedly responsibility friday bloody school siege terrorist attacks killed people	1	0	1	3	4	4	5	7	2	7	6	4	4	7	7	15	9	3	3
Florida Supreme Court puts Nader on state ballot (AFP)AFP - The Florida Supreme Court has ruled that third-party presidential hopeful Ralph Nader can appear on ballots in the decisive state, increasing the chance the maverick contender will again influence the outcome of the presidential election.	1	florida supreme court nader ballot afp afp florida supreme court ruled presidential hopeful ralph nader ballots decisive increasing chance maverick contender influence outcome presidential election	1	0	1	4	1	0	6	6	0	4	0	11	0	14	13	8	0	14	7
Local Israeli And Palestinian Teens React To Arafat #39;s DeathThe death of Palestinian leader Yasser Arafat is deeply dividing an already torn Middle Eastern country. As Palestinians mourn the loss of their leader	1	local israeli palestinian teens react arafat deaththe death palestinian leader yasser arafat deeply dividing torn middle eastern country palestinians mourn loss leader	1	0	1	3	4	0	6	6	0	4	6	4	4	7	7	3	4	10	3
Weah returns to LiberiaLiberian legend George Weah returns to Liberia to launch his bid for the country's presidency.	1	weah returns liberialiberian legend george weah returns liberia launch bid country presidency	1	0	1	4	1	0	6	6	0	4	0	11	0	14	13	8	0	14	7
Rebels kill dozens in Indian unrestIndia #39;s restive north-east is reeling from one of its bloodiest waves of violence in years. Bombings over the weekend left more than 60 dead and 140 injured.	1	rebels kill dozens indian unrestindia restive reeling bloodiest waves violence bombings weekend left dead injured	1	0	1	3	4	4	5	7	2	7	6	4	4	7	7	5	9	3	3
Turkish Parliament Fails to Pass Reforms (AP)AP - Turkey's parliament adjourned Saturday without passing a key reform package because of divisions over the government's proposal to make adultery a crime, bringing warnings from the European Union that delays could hurt Turkey's chances of membership.	1	turkish parliament fails pass reforms ap ap turkey parliament adjourned saturday passing key reform package divisions government proposal adultery crime bringing warnings european union delays hurt turkey chances membership	1	0	1	4	1	0	6	6	0	4	0	11	5	0	0	9	13	7	4
U.S. Seeks Reconciliation with Oil-Rich Venezuela SAO PAULO, Brazil (Reuters) - The United States said on Monday it will seek better ties with oil-rich Venezuela in the clearest sign since President Hugo Chavez won a recall referendum in August that Washington is looking for reconciliation with the firebrand populist.	1	seeks reconciliation venezuela sao paulo brazil reuters united monday seek ties venezuela clearest sign president hugo chavez won recall referendum august washington reconciliation firebrand populist	1	0	1	4	1	0	6	6	0	4	0	11	0	14	13	8	0	14	7
Venezuela Seeking Arms, Perhaps MiG-29s&lt;p&gt;&lt;/p&gt;&lt;p&gt; CARACAS, Venezuela (Reuters) - Venezuela is looking to buyarms to strengthen its military capability and Russian MiG-29fighters are among the options being evaluated, a seniorofficer said on Monday.&lt;/p&gt;	1	venezuela seeking arms lt gt lt gt lt gt caracas venezuela reuters venezuela buyarms strengthen military capability russian options evaluated seniorofficer lt gt	1	0	1	4	1	5	0	0	1	0	10	7	3	10	15	0	8	16	0
US soldiers in Iraq murder probeFour soldiers are charged with the murder of an Iraqi general who died in custody in Iraq, the US army says.	1	soldiers iraq murder probefour soldiers charged murder iraqi died custody iraq army	1	0	1	3	4	4	5	7	2	7	8	5	12	7	9	15	6	15	8
Panama flooding kills nine peopleAt least nine people - seven of them children - have died in flooding in the capital of Panama. The authorities say at least 13 people are still missing after heavy rainfall caused rivers to break their banks.	1	panama flooding kills peopleat people children died flooding capital panama authorities people missing heavy rainfall caused rivers break banks	1	0	1	3	4	4	5	7	2	7	6	4	4	7	7	5	9	3	3
Philippine Rail Cars Crash Into Ravine, 100 Trapped MANILA (Reuters) - Rescuers in the Philippines smashed train windows with axes and hammers Friday to reach 100 passengers trapped when a carriage derailed and dragged other cars into a ravine, killing at least four people.	1	philippine rail cars crash ravine trapped manila reuters rescuers philippines smashed train windows axes hammers friday reach passengers trapped carriage derailed dragged cars ravine killing people	1	0	1	3	5	4	5	7	2	7	6	4	4	7	7	5	9	3	3
Insurgents target Green ZoneInsurgents exploded two car bombs at the gates of the main US-Iraqi headquarters in Baghdad and near major hotels Monday, killing at least 21 people and wounding 96.	1	insurgents target green zoneinsurgents exploded car bombs gates main headquarters baghdad major hotels monday killing people wounding	1	0	1	3	4	4	5	7	2	7	6	4	4	7	7	5	9	3	3
Five killed in suicide car bombing, three taken hostage in IraqViolence raged on in Iraq on Friday, with five Iraqis killed in a suicide car bombing in Baghdad and three more Turkish drivers reportedly kidnapped.	1	killed suicide car bombing hostage iraqviolence raged iraq friday iraqis killed suicide car bombing baghdad turkish drivers reportedly kidnapped	1	0	1	3	4	4	5	7	2	7	6	5	12	7	7	15	9	3	3
Sex Toy Shuts Down Australian AirportA scare triggered by a vibrating sex toy shut down a major Australian regional airport for almost an hour on Monday. The vibrating object was discovered on Monday morning inside a garbage can at the terminal	1	sex toy shuts australian airporta scare triggered vibrating sex toy shut major australian regional airport hour monday vibrating object discovered monday morning inside garbage terminal	1	0	1	3	5	4	3	2	8	8	1	0	8	6	4	4	15	0	17
Annan Starts Reshuffling UN Staff for Reform Push (Reuters)Reuters - U.N. Secretary-General Kofi\Annan on Monday chose the high-profile British head of a key\agency as his new chief of staff, the start of a reshuffle\aimed at instituting U.N. reforms and combating scandals.	1	annan starts reshuffling staff reform push reuters reuters monday chose british head chief staff start instituting reforms combating scandals	1	0	1	4	1	0	6	6	0	4	0	11	5	0	0	9	13	7	4
Why Putin is backing Kyoto againWhy did Russian President Vladimir Putin decide to ratify the Kyoto Protocol on climate change last week, only six months after his top adviser, Andrei Illarionov, called it a quot;death treaty?	1	putin kyoto againwhy russian president vladimir putin decide ratify kyoto protocol climate change week months top adviser andrei illarionov called quot death treaty	1	0	1	4	1	0	6	6	0	4	0	11	5	0	0	9	13	7	4
Cambodia #39;s Legislature Bars Government from Pardoning Khmer RougeLegislators today approved laws barring the Cambodian government from pardoning Khmer Rouge suspects, one day after ratifying a landmark UN-backed plan to set up a tribunal to prosecute surviving leaders of the murderous 1970s regime.	1	cambodia legislature bars government pardoning khmer rougelegislators approved laws barring cambodian government pardoning khmer rouge suspects day ratifying landmark plan set tribunal prosecute surviving leaders murderous 1970s regime	1	0	1	4	1	0	6	6	0	4	0	11	7	8	11	13	6	15	10
What they said about ... ... Cherie BlairCherie Blair cast aside her treasured privacy this week, touring newspapers offices and television studios to promote The Goldfish Bowl, her new book, which focuses on Downing Street spouses.	1	cherie blaircherie blair cast treasured privacy week touring newspapers offices television studios promote goldfish bowl book focuses street spouses	0	1	0	4	1	0	3	4	7	9	7	8	0	14	14	6	12	13	13
Deadly Explosion Hits Central BaghdadThere were no official casualty figures but witnesses said at least four people were killed and several others wounded. The blast set more than 10 cars on fire.	1	deadly explosion hits central baghdadthere official casualty figures witnesses people killed wounded blast set cars fire	1	0	1	3	4	4	5	7	2	7	6	4	4	7	7	5	9	3	3
Ex-general wins Indonesian electionsRetired general Susilo Bambang Yudhoyono was on Monday confirmed as Indonesia #39;s next leader as final counting from the country #39;s first direct presidential polls gave him a landslide victory over his predecessor.	1	wins indonesian electionsretired susilo bambang yudhoyono monday confirmed indonesia leader final counting country direct presidential polls landslide victory predecessor	1	0	1	4	1	0	6	6	0	4	0	11	0	14	13	8	0	14	7
Dutch Lawmakers Say Threat Underestimated (AP)AP - Dutch lawmakers accused the government Thursday of underestimating the threat from Islamic terrorists and failing to protect a filmmaker slain by a suspected Muslim radical.	1	dutch lawmakers threat underestimated ap ap dutch lawmakers accused government thursday underestimating threat islamic terrorists failing protect filmmaker slain suspected muslim radical	1	0	1	3	4	4	5	7	2	7	8	5	12	8	9	13	6	15	10
Iraqi Airways resumes international flights after 14 yearsIraqi Airways resumed international flights Saturday when a plane took off from neighboring Jordan, the airline #39;s first such flight since UN sanctions were imposed on Saddam Hussein in 1990.	1	iraqi airways resumes international flights yearsiraqi airways resumed international flights saturday plane neighboring jordan airline flight sanctions imposed saddam hussein	1	0	1	4	1	4	0	0	8	8	1	7	3	6	15	4	15	11	18
Sudan Accuses U.S. Over Darfur Talks Breakdown ABUJA (Reuters) - Sudan blamed the United States for the failure of three weeks of peace talks between Khartoum and Darfur rebels on Friday, but African Union mediators said negotiations would resume in October.	1	sudan accuses darfur talks breakdown abuja reuters sudan blamed united failure weeks peace talks khartoum darfur rebels friday african union mediators negotiations resume october	1	0	1	4	1	0	6	6	0	4	0	11	5	0	0	9	13	7	4
Britain doing quot;all we can quot; for hostage in IraqPrime Minister Tony Blair has his government is doing all in its power to help a kidnapped Briton -- but he has avoided a public response to insurgents threatening to kill the man.	1	britain quot quot hostage iraqprime minister tony blair government power kidnapped briton avoided public response insurgents threatening kill	1	0	1	3	4	4	5	7	2	7	8	5	12	7	9	15	6	17	8
Court Weighs Legal Rights of Mich. Poor (AP)AP - With backing from two-fifths of all states, Michigan asked the Supreme Court on Monday to whether a state can refuse to pay for appeals by indigent defendants who plead guilty to crimes.	1	court weighs legal rights poor ap ap michigan supreme court monday refuse pay appeals indigent defendants plead guilty crimes	1	0	1	4	1	5	3	2	1	0	8	8	7	8	11	13	6	15	10
Israeli Soldiers Kill Palestinian Gunman in Gaza -Army (Reuters)Reuters - Israeli soldiers shot and killed a\Palestinian gunman on Monday as he approached a military\outpost near a Jewish settlement in the southern Gaza Strip, a\military source said.	1	israeli soldiers kill palestinian gunman gaza reuters reuters israeli soldiers shot killed gunman monday approached jewish settlement southern gaza strip source	1	0	1	3	4	4	5	7	2	7	6	4	4	7	7	3	4	10	3
Malaysia discovers new bird flu caseKUALA LUMPUR - Malaysia discovered new cases of bird flu on Sunday within a quarantine area in northern Malaysia where workers have struggled for a month to eradicate the virus.	1	malaysia discovers bird flu casekuala lumpur malaysia discovered bird flu sunday quarantine northern malaysia workers struggled month eradicate virus	1	0	1	3	5	4	5	7	8	8	1	6	4	0	0	5	9	3	6
Halliburton Set for Spotlight in VP Debates (Reuters)Reuters - A name likely to come up in\Tuesday's vice presidential debate is Halliburton, the Texas\company once run by Dick Cheney that Democrats say is an\example of cronyism because of its lucrative Iraq deals.	1	halliburton set spotlight vp debates reuters reuters vice presidential debate halliburton dick cheney democrats cronyism lucrative iraq deals	1	0	1	4	1	0	6	6	0	4	0	11	0	14	13	8	0	14	7
Polls Open for Indonesia #39;s First Direct Presidential ElectionsPolls have opened for Indonesia #39;s first direct presidential election. Election observers say they are impressed with the six-month electoral process, which also chose members of the national assembly and local councils.	1	polls indonesia direct presidential electionspolls indonesia direct presidential election election observers impressed electoral process chose national assembly local councils	1	0	1	4	1	0	6	6	0	4	0	11	0	14	13	8	0	14	7
Some Grieve for Arafat While Others Sigh in ReliefIn death, as in life, the Palestinian leader Yasir Arafat provoked a great wave of contrary emotions across the Middle East on Thursday - grief at the passing of the once	1	grieve arafat sigh reliefin death life palestinian leader yasir arafat provoked wave contrary emotions middle east thursday grief passing	1	0	1	3	4	0	6	6	0	4	0	11	4	7	7	3	4	10	3
Democracy thrives in largest Muslim stateIndonesia #39;s presidential favorite Susilo Bambang Yudhoyono spent part of a three-day break between the campaign and Monday #39;s historic election not resting, but writing.	1	democracy thrives largest muslim stateindonesia presidential favorite susilo bambang yudhoyono spent break campaign monday historic election resting writing	1	0	1	4	1	0	6	6	0	4	0	11	0	14	13	8	0	14	7
Girls 'observe' French scarf banOnly about 100 French Muslim girls are breaking the new ban on headscarves at school, the education minister says.	1	girls french scarf banonly french muslim girls breaking ban headscarves school education minister	1	0	1	4	1	4	3	2	2	7	8	5	12	8	9	13	6	15	10
German Far-Right Profits from Anger Over ReformsGerman far-right parties surged in eastern state elections Sunday, riding public anger against government welfare cuts and fanning fears among mainstream parties that the country #39;s image could suffer.	1	german profits anger reformsgerman parties surged eastern elections sunday riding public anger government welfare cuts fanning fears mainstream parties country image suffer	1	0	1	2	0	0	6	6	0	4	0	11	0	14	13	8	0	14	7
Sudan: UN Ruling Won #39;t Help Stop CrisisKHARTOUM, Sudan Sept. 19, 2004 - A US-backed United Nations resolution threatening oil sanctions for the violence in Sudan #39;s Darfur region will only make it harder for the government to calm the insurrection there, a Sudanese official said Sunday.	1	sudan ruling won crisiskhartoum sudan united nations resolution threatening oil sanctions violence sudan darfur region harder government calm insurrection sudanese official sunday	1	0	1	3	4	0	6	6	0	4	0	11	5	0	0	9	13	7	4
Suicide car bombing kills three, wounds seven in northern IraqA suicide attacker detonated a car bomb Sunday near a joint US-Iraqi checkpoint, killing three people and wounding seven, including four US soldiers in the northern city of Samarra, the military said.	1	suicide car bombing kills wounds northern iraqa suicide attacker detonated car bomb sunday joint checkpoint killing people wounding including soldiers northern city samarra military	1	0	1	3	4	4	5	7	2	7	6	4	4	7	7	5	9	3	3
Sudan says it will abide by 'unfair' UN resolution on Darfur (AFP)AFP - Sudan has condemned as quot;unfair quot; a new UN resolution calling on Khartoum to restore security to the crisis-wracked Darfur region or face possible sanctions, but said it would abide by the UN's demands.	1	sudan abide resolution darfur afp afp sudan condemned quot unfair quot resolution calling khartoum restore security darfur region sanctions abide demands	1	0	1	4	1	0	6	6	0	4	0	11	5	0	0	9	13	7	4
EU transport chief hails Alitalia accord (AFP)AFP - EU transport and energy commissioner Loyola de Palacio hailed the accord reached between Alitalia management and staff on a major restructuring plan aimed at keeping the struggling airline in the air.	1	eu transport chief hails alitalia accord afp afp eu transport energy commissioner loyola de palacio hailed accord reached alitalia management staff major restructuring plan aimed keeping struggling airline air	0	1	3	4	1	0	0	0	0	4	10	7	3	10	15	0	8	11	18
Earthquake hits Indonesian islandAt least six people are killed as a strong earthquake jolts an island in eastern Indonesia.	1	earthquake hits indonesian islandat people killed strong earthquake jolts island eastern indonesia	1	0	1	3	4	4	5	7	2	7	6	4	4	7	7	5	9	3	3
Briton Charged With Plotting Bomb AttackWASHINGTON - U.S. authorities brought charges Monday against a British man they contend conspired with admitted al-Qaida member Richard Reid to use shoe bombs to blow up planes in midair...	1	briton charged plotting bomb attackwashington authorities brought charges monday british contend conspired admitted richard reid shoe bombs blow planes midair	1	0	1	3	4	4	3	2	2	7	8	5	7	8	11	13	6	15	10
UN Signs Pact with New World Court Opposed by U.S. UNITED NATIONS (Reuters) - The United Nations signed a cooperation agreement on Monday with the new International Criminal Court, despite objections to the tribunal from the United States.	1	signs pact court opposed united nations reuters united nations signed cooperation agreement monday international criminal court objections tribunal united	1	0	1	4	1	0	6	6	0	4	0	11	5	0	0	9	13	7	4
Asia ; Freed UN Hostages Say Humbled by Support in OrdealThe UN workers, who helped to run a presidential election won last month by US-backed incumbent Karzai, discussed their ordeal with him at his presidential palace in the morning.	1	asia freed hostages humbled support ordealthe workers helped presidential election won month incumbent karzai discussed ordeal presidential palace morning	1	0	1	4	1	0	6	6	0	4	0	11	0	14	13	8	0	14	7
Britain plans national ID cardsLondon -- Invoking a global threat of terrorism, the British government announced plans Tuesday to introduce national identity cards for the first time since the World War II era.	1	britain plans national cardslondon invoking global threat terrorism british government announced plans tuesday introduce national identity cards time war ii era	1	0	1	4	1	0	6	6	0	4	8	5	12	0	9	7	6	15	14
UN calls emergency meeting over Israeli onslaughtThe UN Security Council called an emergency meeting Monday at the request of Arab nations to consider a resolution demanding an immediate halt to a major Israeli offensive in the northern Gaza Strip.	1	calls emergency meeting israeli onslaughtthe security council called emergency meeting monday request arab nations resolution demanding halt major israeli offensive northern gaza strip	1	0	1	3	4	0	6	6	0	4	6	4	5	0	0	3	4	10	4
Saudi Trial Could Alter Pace of ReformIn a hearing room on the 11th floor of the High Court of Riyadh, two professors and a poet have been standing trial, sometimes drawing overflow crowds of people eager to monitor a case that could alter the pace of political reform in the kingdom.	1	saudi trial alter pace reformin hearing 11th floor court riyadh professors poet standing trial drawing overflow crowds people eager monitor alter pace political reform kingdom	1	0	1	4	1	5	3	2	1	0	8	8	7	8	11	13	6	15	10
Japan's army works out plan to cope with North Korean terror attack (AFP)AFP - Japan's army has worked out a secret plan to deal with possible large-scale terror attacks by North Korea, a press report said.	1	japan army plan cope north korean terror attack afp afp japan army secret plan deal terror attacks north korea press report	1	0	1	4	1	0	6	6	0	4	0	11	5	0	0	9	13	7	4
La. Becomes Latest Political Battleground (AP)AP - The swamps, bayous and rice fields of Louisiana's Cajun country have emerged as the site of the nation's latest political battleground.	1	la political battleground ap ap swamps bayous rice fields louisiana cajun country emerged site nation political battleground	1	0	1	4	1	0	6	6	0	4	0	11	0	14	13	8	0	14	7
Voters Flock to Register by DeadlineIn a glimpse of what the nation might see a month from now, people lined up at election offices and caused parking lot traffic jams as voter registration deadlines fell Monday in more than a dozen states. Many officials reported record numbers of new voters, some said they were overwhelmed, and allegations were already flying about fraud and the disqualificatio…	1	voters flock register deadlinein glimpse nation month people lined election offices caused parking lot traffic jams voter registration deadlines fell monday dozen officials reported record voters overwhelmed allegations flying fraud disqualification voters applications	1	0	1	4	1	0	6	6	0	4	0	11	0	14	13	8	0	14	7
At least 20 dead in Kurkik bombingA suicide attacker detonated a car bomb near a crowd of people waiting to apply for jobs with the Iraqi National Guard in the northern city of Kirkuk on yesterday, killing at least 20 people and wounding 16, officials said.	1	dead kurkik bombinga suicide attacker detonated car bomb crowd people waiting apply jobs iraqi national guard northern city kirkuk yesterday killing people wounding officials	1	0	1	3	4	4	5	7	2	7	6	4	4	7	7	5	9	3	3
#39;Grateful #39; Kabul hostages look forward to returning to workThree UN election workers who were freed yesterday nearly a month after being abducted in Afghanistan have spoken of their gratitude to the Afghan people for supporting them during their plight.	1	grateful kabul hostages forward returning workthree election workers freed yesterday month abducted afghanistan spoken gratitude afghan people supporting plight	1	0	1	3	4	4	5	7	2	7	8	5	12	7	9	15	9	3	8
Iran Seeks to Amend Nuclear Freeze Deal (AP)AP - Iran sought on Wednesday to partially roll back its commitment to freeze all uranium enrichment programs, demanding the right to run some equipment that can be used to produce nuclear arms.	1	iran seeks amend nuclear freeze deal ap ap iran sought wednesday partially roll commitment freeze uranium enrichment programs demanding equipment produce nuclear arms	1	0	1	4	1	0	6	6	0	4	0	11	5	0	0	9	13	7	4
France criticizes Iraq hostage mediatorsFrance has criticized unofficial negotiators for complicating release efforts for two French hostages held in Iraq, the BBC reported Saturday.	1	france criticizes iraq hostage mediatorsfrance criticized unofficial negotiators complicating release efforts french hostages held iraq bbc reported saturday	1	0	1	3	4	4	5	7	2	7	8	5	12	0	9	15	6	17	8
Leaked secrets reveal chaos at heart of Blair #39;s Iraq plansTONY Blair was facing a new Iraq crisis last night after explosive evidence emerged from within his own government that he was warned the country would be plunged into chaos after the fall of Saddam Hussein.	1	leaked secrets reveal chaos heart blair iraq planstony blair facing iraq crisis night explosive evidence emerged government warned country plunged chaos fall saddam hussein	1	0	1	3	4	0	6	6	0	4	8	5	12	0	9	15	6	15	8
Two million take part in all-night cultural festival in Rome (AFP)AFP - Two million people massed in the streets of Rome and in its monuments and museums overnight, celebrating the Italian capital's second annual all-night cultural extravaganza, the mayor said.	1	cultural festival rome afp afp people massed streets rome monuments museums overnight celebrating italian capital annual cultural extravaganza mayor	1	0	1	3	4	4	5	7	2	7	6	4	4	7	7	5	9	3	3
Ryder Cup: Europe close on victoryAnother good day at Oakland Hills sees Europe move 11-5 clear of the USA going into Sunday's Ryder Cup singles.	1	ryder cup europe close victoryanother day oakland hills europe move usa sunday ryder cup singles	0	2	2	0	2	1	2	1	4	1	2	10	2	9	3	12	1	1	5
[truncated: 6,523 more rows]
