# Supplementary material for: An adaptive method for determining the optimal number of topics in topic modeling
Source: PeerJ journal article supplement (doi:10.7717/peerj-cs.2723), 2025-02-28
Supplement: Code.zip [file all_inter_class_distance.xlsx]

## Sheet: Sheet1
bbcsport_nmf	bbcsport_lda	bbcnews_lda	bbcsport_kmeans	bbcnews_nmf	bbcnews_kmeans	reuter_lda	reuter_nmf	reuter_kmeans	snippets1_seanmf	snippets1_gsdmm	snippets2_gsdmm	snippets2_seanmf	agnews_seanmf	agnews_gsdmm
2.16324	2.11723	2.6618	2.26534	3.02085	3.00625	3.36019	3.44541	3.5732	3.25785	3.25986	3.24841	3.40529	3.00458	2.95395
2.20233	1.9071	2.77037	2.18507	2.93585	3.02221	3.42084	3.46515	3.4951	3.21787	3.08408	3.3514	3.32778	3.09569	3.06494
2.18722	1.92844	2.74904	2.13091	2.81741	2.88756	3.05881	3.22831	3.29905	3.22117	3.17853	3.07504	3.061	3.00737	2.98589
2.05775	2.01071	2.6287	2.13865	2.73423	2.84685	2.70909	3.07151	3.30115	2.8121	2.93341	2.85164	2.91921	2.86024	2.7631
2.05523	1.76729	2.46354	1.9925	2.51196	2.75183	2.56582	2.93137	3.15188	2.63107	3.01663	2.77752	2.80118	2.67545	2.64097
1.98072	1.67541	2.21271	2.00885	2.50313	2.60049	2.29633	2.80489	3.03962	2.78585	2.87434	2.72937	2.78919	2.69201	2.61185
1.90798	1.61949	2.1059	1.96753	2.4169	2.56287	2.34715	2.79771	2.97993	2.679	2.88148	2.60385	2.72165	2.58418	2.52176
1.88635	1.6653	2.19595	1.85709	2.25351	2.49214	2.36147	2.72224	2.79321	2.66789	2.81616	2.64135	2.72887	2.50315	2.47288
1.89023	1.59512	2.19348	1.89263	2.25928	2.44181	2.26098	2.62905	2.75285	2.71363	2.71964	2.59874	2.5718	2.43107	2.33125
1.79667	1.53245	2.19851	1.78617	2.26941	2.39903	2.14187	2.56648	2.69997	2.63334	2.72889	2.45836	2.38457	2.38397	2.32699
1.72715	1.44293	2.06345	1.76227	2.21843	2.33432	2.02695	2.55249	2.62356	2.68356	2.75746	2.49772	2.45461	2.34759	2.28014
1.75888	1.52413	1.98081	1.81852	2.25717	2.32355	2.10315	2.47671	2.54178	2.65178	2.63119	2.37091	2.40445	2.33141	2.29106
1.73306	1.42975	2.00366	1.7549	2.25508	2.27233	2.02538	2.44313	2.51383	2.59465	2.61965	2.46411	2.3579	2.33667	2.17438
1.70989	1.39302	1.90664	1.71086	2.15042	2.23226	1.93908	2.38577	2.46751	2.57478	2.63772	2.40497	2.36047	2.23201	2.16661
1.69969	1.34536	1.85841	1.69817	2.13288	2.21026	1.84621	2.33307	2.41575	2.53899	2.51559	2.36371	2.40635	2.19005	2.1773
1.66637	1.30205	1.82639	1.68301	2.10209	2.10127	1.85225	2.29115	2.24624	2.51686	2.46435	2.32963	2.36976	2.25261	2.17614
1.64231	1.33107	1.71326	1.63026	2.09483	2.17257	1.79392	2.2558	2.26784	2.44505	2.52377	2.39725	2.41145	2.26495	2.15125
1.62784	1.37856	1.72482	1.59545	2.10029	2.14504	1.77442	2.22266	2.2908	2.46267	2.46663	2.37757	2.35268	2.23256	2.03775
1.63867	1.31553	1.67768	1.6028	2.0076	2.05685	1.76705	2.17299	2.22124	2.47023	2.4351	2.28089	2.2289	2.24597	2.10214
