# Supplementary material for: An adaptive method for determining the optimal number of topics in topic modeling
Source: PeerJ journal article supplement (doi:10.7717/peerj-cs.2723), 2025-02-28
Supplement: Code.zip [file bbcnews_lda.xlsx]

## Sheet: Sheet1
new	type	new_nltk	topic2	topic3	topic4	topic5	topic6	topic7	topic8	topic9	topic10	topic11	topic12	topic13	topic14	topic15	topic16	topic17	topic18	topic19	topic20
Ad sales boost Time Warner profit Quarterly profits at US media giant TimeWarner jumped 76% to $1.13bn (£600m) for the three months to December, from $639m yearearlier. The firm, which is now one of the biggest investors in Google, benefited from sales of highspeed internet connections and higher advert sales. TimeWarner said fourth quarter sales rose 2% to $11.1bn from $10.9bn. Its profits were …	business	ad sales boost time warner profit quarterly profits media giant timewarner jumped months december yearearlier firm biggest investors google benefited sales highspeed internet connections advert sales timewarner fourth quarter sales rose profits buoyed oneoff gains offset profit dip warner bros users aol time warner friday owns searchengine google internet business aol mixed fortunes lost subscrib…	0	1	0	0	4	4	4	4	4	4	4	4	11	11	11	11	11	11	11
Dollar gains on Greenspan speech The dollar has hit its highest level against the euro in almost three months after the Federal Reserve head said the US trade deficit is set to stabilise. And Alan Greenspan highlighted the US government's willingness to curb spending and rising household savings as factors which may help to reduce it. In late trading in New York, the dollar reached $1.2871 agains…	business	dollar gains greenspan speech dollar hit level euro months federal reserve head trade deficit set stabilise alan greenspan highlighted government willingness curb spending rising household savings factors reduce late trading york dollar reached euro thursday market concerns deficit hit greenback months friday federal reserve chairman greenspan speech london ahead meeting finance ministers dollar …	0	1	0	0	4	4	4	4	4	4	4	4	4	4	4	4	11	4	4
Yukos unit buyer faces loan claim The owners of embattled Russian oil giant Yukos are to ask the buyer of its former production unit to pay back a $900m (£479m) loan. Stateowned Rosneft bought the Yugansk unit for $9.3bn in a sale forced by Russia to part settle a $27.5bn tax claim against Yukos. Yukos' owner Menatep Group says it will ask Rosneft to repay a loan that Yugansk had secured on its a…	business	yukos unit buyer loan claim owners embattled russian oil giant yukos buyer production unit pay loan stateowned rosneft bought yugansk unit sale forced russia settle tax claim yukos yukos owner menatep rosneft repay loan yugansk secured assets rosneft repayment demand foreign banks legal experts rosneft purchase yugansk obligations pledged assets rosneft pay real money creditors avoid seizure yuga…	0	0	0	0	0	0	0	0	0	0	0	0	0	0	0	0	0	0	0
High fuel prices hit BA's profits British Airways has blamed high fuel prices for a 40% drop in profits. Reporting its results for the three months to 31 December 2004, the airline made a pretax profit of £75m ($141m) compared with £125m a year earlier. Rod Eddington, BA's chief executive, said the results were "respectable" in a third quarter when fuel costs rose by £106m or 47.3%. BA's profits …	business	fuel prices hit ba profits british airways blamed fuel prices drop profits reporting months december airline pretax profit compared earlier rod eddington ba chief executive respectable quarter fuel costs rose ba profits market expectation expects rise fullyear revenues offset increased price aviation fuel ba introduced fuel surcharge passengers october increased oneway longhaul flights shorthaul …	0	1	0	0	4	4	4	4	4	4	4	4	4	4	11	4	11	4	11
Pernod takeover talk lifts Domecq Shares in UK drinks and food firm Allied Domecq have risen on speculation that it could be the target of a takeover by France's Pernod Ricard. Reports in the Wall Street Journal and the Financial Times suggested that the French spirits firm is considering a bid, but has yet to contact its target. Allied Domecq shares in London rose 4% by 1200 GMT, while Pernod sh…	business	pernod takeover talk lifts domecq shares uk drinks food firm allied domecq risen speculation target takeover france pernod ricard reports wall street journal financial times suggested french spirits firm bid contact target allied domecq shares london rose gmt pernod shares paris slipped pernod seeking acquisitions refused comment specifics pernod major purchase giant seagram move propelled global…	0	1	0	0	4	4	4	0	0	0	0	6	11	11	11	11	6	11	11
Japan narrowly escapes recession Japan's economy teetered on the brink of a technical recession in the three months to September, figures show. Revised figures indicated growth of just 0.1% and a similarsized contraction in the previous quarter. On an annual basis, the data suggests annual growth of just 0.2%, suggesting a much more hesitant recovery than had previously been thought. A common tec…	business	japan narrowly escapes recession japan economy teetered brink technical recession months september figures revised figures growth similarsized contraction previous quarter annual basis data suggests annual growth suggesting hesitant recovery common technical definition recession successive quarters negative growth government keen play worrying implications data maintain view japan economy remains…	0	1	0	0	4	4	4	4	4	4	4	4	4	4	4	4	11	4	4
Jobs growth still slow in the US The US created fewer jobs than expected in January, but a fall in jobseekers pushed the unemployment rate to its lowest level in three years. According to Labor Department figures, US firms added only 146,000 jobs in January. The gain in nonfarm payrolls was below market expectations of 190,000 new jobs. Nevertheless it was enough to push down the unemployment rat…	business	jobs growth slow created fewer jobs expected january fall jobseekers pushed unemployment rate lowest level labor department figures firms jobs january gain nonfarm payrolls market expectations jobs push unemployment rate lowest level september job gains president bush celebrate albeit fine margin net growth jobs economy term office presided net fall jobs november presidential election president h…	0	1	0	0	4	4	4	4	4	4	4	4	4	4	4	4	11	4	4
India calls for fair trade rules India, which attends the G7 meeting of seven leading industrialised nations on Friday, is unlikely to be cowed by its newcomer status. In London on Thursday ahead of the meeting, India's finance minister, lashed out at the restrictive trade policies of the G7 nations. He objected to subsidies on agriculture that make it hard for developing nations like India to co…	business	india calls fair trade rules india attends meeting leading industrialised nations friday cowed newcomer status london thursday ahead meeting india finance minister lashed restrictive trade policies nations objected subsidies agriculture hard developing nations india compete called reform united nations bank imf palaniappan chidambaram india finance minister argued organisations account changing i…	0	1	0	0	4	4	4	4	4	4	4	4	4	4	4	4	11	4	4
Ethiopia's crop production up 24% Ethiopia produced 14.27 million tonnes of crops in 2004, 24% higher than in 2003 and 21% more than the average of the past five years, a report says. In 2003, crop production totalled 11.49 million tonnes, the joint report from the Food and Agriculture Organisation and the World Food Programme said. Good rains, increased use of fertilizers and improved seeds cont…	business	ethiopia crop production ethiopia produced tonnes crops average report crop production totalled tonnes joint report food agriculture organisation food programme rains increased fertilizers improved seeds contributed rise production ethiopians emergency assistance report calculated emergency food requirements tonnes top tonnes fortified blended food vegetable oil targeted supplementary food distri…	0	1	0	0	0	4	6	8	8	8	8	8	8	8	8	8	0	8	10
Court rejects $280bn tobacco case A US government claim accusing the country's biggest tobacco companies of covering up the effects of smoking has been thrown out by an appeal court. The demand for $280bn (£155bn) filed by the Clinton administration in 1999 was rejected in a 21 decision. The court in Washington found that the case could not be brought under federal antiracketeering laws. Among th…	business	court rejects tobacco government claim accusing country biggest tobacco companies covering effects smoking thrown appeal court demand filed clinton administration rejected decision court washington brought federal antiracketeering laws accused altria rj reynolds tobacco lorillard tobacco liggett brown williamson government claimed tobacco firms manipulated nicotine levels increase addiction targe…	0	1	0	0	0	0	0	0	0	0	0	0	0	0	0	0	0	18	18
Ask Jeeves tips online ad revival Ask Jeeves has become the third leading online search firm this week to thank a revival in internet advertising for improving fortunes. The firm's revenue nearly tripled in the fourth quarter of 2004, exceeding $86m (£46m). Ask Jeeves, once among the bestknown names on the web, is now a relatively modest player. Its $17m profit for the quarter was dwarfed by the …	business	jeeves tips online ad revival jeeves leading online search firm week revival internet advertising improving fortunes firm revenue tripled fourth quarter exceeding jeeves bestknown names web modest player profit quarter dwarfed announced rival google earlier week quarter yahoo earned tipping resurgence online advertising trend hold late marketing company doubleclick leading providers online advert…	0	2	0	0	4	4	4	4	4	4	4	4	13	11	11	11	11	11	11
Indonesians face fuel price rise Indonesia's government has confirmed it is considering raising fuel prices by as much as 30%. Millions of Indonesians use kerosene for basic cooking, and prices have been heavily subsidised for years. President Susilo Bambang Yudhoyono's government has said it wants to curb fuel subsidies and direct the money into aid programmes for the poor. But critics argue cut…	business	indonesians fuel price rise indonesia government confirmed raising fuel prices millions indonesians kerosene basic cooking prices heavily subsidised president susilo bambang yudhoyono government curb fuel subsidies direct money aid programmes poor critics argue cutting subsidies hurt poorer families government millions people left homeless indonesia aceh region earthquake tsunami disaster late de…	0	1	0	0	4	4	4	4	4	4	4	4	4	4	4	1	11	4	4
Peugeot deal boosts Mitsubishi Struggling Japanese car maker Mitsubishi Motors has struck a deal to supply French car maker Peugeot with 30,000 sports utility vehicles (SUV). The two firms signed a Memorandum of Understanding, and say they expect to seal a final agreement by Spring 2005. The alliance comes as a badlyneeded boost for lossmaking Mitsubishi, after several profit warnings and poor sa…	business	peugeot deal boosts mitsubishi struggling japanese car maker mitsubishi motors struck deal supply french car maker peugeot sports utility vehicles suv firms signed memorandum understanding expect seal final agreement spring alliance badlyneeded boost lossmaking mitsubishi profit warnings poor sales suvs built japan peugeot diesel engines sold european market falling sales left mitsubishi motors u…	0	1	0	0	4	4	4	4	4	4	4	4	4	4	11	4	4	4	4
Telegraph newspapers axe 90 jobs The Daily and Sunday Telegraph newspapers are axing 90 journalist jobs 17% of their editorial staff. The Telegraph Group says the cuts are needed to fund an £150m investment in new printing facilities. Journalists at the firm met on Friday afternoon to discuss how to react to the surprise announcement. The cuts come against a background of fierce competition for r…	business	telegraph newspapers axe jobs daily sunday telegraph newspapers axing journalist jobs editorial staff telegraph cuts fund investment printing facilities journalists firm met friday afternoon react surprise announcement cuts background fierce competition readers sluggish advertising revenues amid competition online advertising national union journalists called management recall notice redundancy m…	1	1	1	1	1	1	1	8	0	7	11	11	11	11	13	11	11	11	11
Air passengers win new EU rights Air passengers who are unable to board their flights because of overbooking, cancellations or flight delays can now demand greater compensation. New EU rules set compensation at between 250 euros (£173) and 600 euros, depending on the length of the flight. The new rules will apply to all scheduled and charter flights, including budget airlines. Airlines have attac…	business	air passengers win eu rights air passengers unable board flights overbooking cancellations flight delays demand compensation eu rules set compensation euros euros depending length flight rules apply scheduled charter flights including budget airlines airlines attacked legislation forced push prices cover extra cost european commission facing legal challenges european lowfare airlines association …	0	1	0	0	0	0	6	8	8	8	8	8	8	8	8	8	8	8	8
China keeps tight rein on credit China's efforts to stop the economy from overheating by clamping down on credit will continue into 2005, state media report. The curbs were introduced earlier this year to ward off the risk that rapid expansion might lead to soaring prices. There were also fears that too much stress might be placed on the fragile banking system. Growth in China remains at a breakn…	business	china tight rein credit china efforts economy overheating clamping credit continue media report curbs introduced earlier ward risk rapid expansion lead soaring prices fears stress fragile banking system growth china remains breakneck corporate investment growing breakneck pace economic expansion growth rapid toolingup china manufacturing sector massive demand energy factors oil prices skyhigh the…	0	1	0	0	4	4	4	4	4	4	4	4	4	4	4	4	11	4	4
Parmalat boasts doubled profits Parmalat, the Italian food group at the centre of one of Europe's most painful corporate scandals, has reported a doubling in profit. Its pretax earnings in the fourth quarter were 77m euros (£53m; $100m), up from 38m in the same period of 2003. Less welcome was the news that the firm had been fined 11m euros for having violated takeover rules five years ago. The f…	business	parmalat boasts doubled profits parmalat italian food centre europe painful corporate scandals reported doubling profit pretax earnings fourth quarter euros period news firm fined euros violated takeover rules ago firm sought bankruptcy protection december disclosing hole accounts company debt close euros falling slowly brands wellknown italy overseas continued perform barely lost revenue scandal…	0	1	0	0	0	0	0	0	0	0	0	0	0	11	11	11	0	18	18
India's rupee hits fiveyear high India's rupee has hit a fiveyear high after Standard Poor's (SP) raised the country's foreign currency rating. The rupee climbed to 43.305 per US dollar on Thursday, up from a close of 43.41. The currency has gained almost 1% in the past three sessions. SP, which rates borrowers' creditworthiness, lifted India's rating by one notch to 'BB+'. With Indian assets now…	business	india rupee hits fiveyear india rupee hit fiveyear standard poor sp raised country foreign currency rating rupee climbed dollar thursday close currency gained sessions sp rates borrowers creditworthiness lifted india rating notch indian assets gamble cash expected flow markets buoying rupee upgrade positive basically people excuse india bhanu baweja strategist ubs money moved india weeks january …	0	1	0	0	4	4	4	4	4	4	4	4	11	11	11	4	11	4	4
India widens access to telecoms India has raised the limit for foreign direct investment in telecoms companies from 49% to 74%. Communications Minister Dayanidhi Maran said that there is a need to fund the fastgrowing mobile market. The government hopes to increase the number of mobile users from 95 million to between 200 and 250 million by 2007. "We need at least $20bn (£10.6bn) in investment an…	business	india widens access telecoms india raised limit foreign direct investment telecoms companies communications minister dayanidhi maran fund fastgrowing mobile market government hopes increase mobile users investment foreign direct investment maran decision raise limit foreign investors faced considerable opposition communist parties crucial support coalition headed prime minister manmohan singh pot…	0	1	0	0	4	4	4	4	4	0	0	4	11	11	11	11	11	4	4
Call centre users 'lose patience' Customers trying to get through to call centres are getting impatient and quicker to hang up, a survey suggests. Once past the welcome message, callers on average hang up after just 65 seconds of listening to canned music. The drop in patience comes as the number of calls to call centres is growing at a rate of 20% every year. "Customers are getting used to the i…	business	call centre users patience customers call centres impatient quicker hang survey suggests message callers average hang listening canned music drop patience calls call centres growing rate customers idea society cara diemont firm dimension data commissioned survey call centres sharp increase customers simply abandoning calls record automated phone message systems equation customers pick multiple op…	1	1	3	3	3	3	7	7	7	7	7	8	8	8	15	15	15	15	15
Rank 'set to sell off film unit' Leisure group Rank could unveil plans to demerge its film services unit and sell its media business, reports claim. Rank, formerly famous for the Carry On series, will expose the shakeup at the announcement of its results on Friday, the Sunday Telegraph reported. Advisors Goldman Sachs are understood to have valued its demerged Deluxe Film unit at £300m, the repor…	business	rank sell film unit leisure rank unveil plans demerge film services unit sell media business reports claim rank famous carry series expose shakeup announcement friday sunday telegraph reported advisors goldman sachs understood valued demerged deluxe film unit report speculation shakeup mounted rank announced study demerger september mike smith appointment chief executive focused fewer businesses …	1	1	0	0	4	4	4	7	7	0	11	11	11	11	11	13	13	11	11
Sluggish economy hits German jobs The number of people out of work in Europe's largest economy has risen for the tenth straight month as growth remains stubbornly slow. German unemployment rose 7,000 in November to 4.464 million people, or 10.8% of the workforce. The seasonally adjusted rise showed a smaller rise than expected, as government measures to encourage job creation began to take effect…	business	sluggish economy hits german jobs people europe largest economy risen tenth straight month growth remains stubbornly slow german unemployment rose november people workforce seasonally adjusted rise rise expected government measures encourage job creation officials stagnant growth stifling job market signs revival domestic demand frankjuergen weise head federal labour agency statement growth quart…	0	1	0	0	4	4	4	4	4	4	4	4	4	4	4	4	11	4	4
Mixed signals from French economy The French economy picked up speed at the end of 2004, official figures show but still looks set to have fallen short of the government's hopes. According to state statistics body INSEE, growth for the three months to December was a seasonallyadjusted 0.70.8%, ahead of the 0.6% forecast. If confirmed, that would be the best quarterly showing since early 2002. It …	business	mixed signals french economy french economy picked speed official figures set fallen short government hopes statistics body insee growth months december seasonallyadjusted ahead forecast confirmed quarterly leaves gdp short french government predicted apparent shortfall annual economic growth quarterly figures socalled flash estimate mark continuing trend improving indicators health french econom…	0	1	0	0	4	4	4	4	4	4	4	4	4	4	4	4	11	4	4
US trade gap hits record in 2004 The gap between US exports and imports hit an alltime high of $671.7bn (£484bn) in 2004, latest figures show. The Commerce Department said the trade deficit for all of last year was 24.4% above the previous record 2003's imbalance of $496.5bn. The deficit with China, up 30.5% at $162bn, was the largest ever recorded with a single country. However, on a monthly bas…	business	trade gap hits record gap exports imports hit alltime figures commerce department trade deficit previous record imbalance deficit china largest recorded single country monthly basis trade gap narrowed december consumer appetite oil imported cars wine cheese reached record levels figures spark fresh criticism president bush economic policies democrats claim administration clamp unfair foreign trad…	0	1	0	0	4	4	4	4	4	4	4	4	4	4	4	4	11	4	4
Yukos loses US bankruptcy battle A judge has dismissed an attempt by Russian oil giant Yukos to gain bankruptcy protection in the US. Yukos filed for Chapter 11 protection in Houston in an unsuccessful attempt to halt the auction of its Yugansk division by the Russian authorities. The court ruling is a blow to efforts to get damages for the sale of Yugansk, which Yukos claims was illegally sold. …	business	yukos loses bankruptcy battle judge dismissed attempt russian oil giant yukos gain bankruptcy protection yukos filed chapter protection houston unsuccessful attempt halt auction yugansk division russian authorities court ruling blow efforts damages sale yugansk yukos claims illegally sold separately yukos boss mikhail khodorkovsky testimony friday trial fraud tax evasion khodorkovsky jail pleaded…	0	1	0	0	0	0	0	0	0	0	0	0	0	0	0	0	0	0	0
Safety alert as GM recalls cars The world's biggest carmaker General Motors (GM) is recalling nearly 200,000 vehicles in the US on safety grounds, according to federal regulators. The National Highway Traffic Safety Administration (NHTSA) said the largest recall involves 155,465 pickups, vans and sports utility vehicles (SUVs). This is because of possible malfunctions with the braking systems. Th…	business	safety alert gm recalls cars biggest carmaker motors gm recalling vehicles safety grounds federal regulators national highway traffic safety administration nhtsa largest recall involves pickups vans sports utility vehicles suvs malfunctions braking systems vehicles product recall model gm vehicles potential faults chevrolet avalanche express kodiak silverade suburban gmc savana sierra yukon nhtsa…	0	1	0	0	4	4	4	4	4	4	4	4	8	8	8	8	8	8	4
Steel firm 'to cut' 45,000 jobs Mittal Steel, one of the world's largest steel producers, could cut up to 45,000 jobs over the next five years, its chief executive has said. The Netherlandsbased company is due to complete its $4.5bn acquisition of US firm ISG next month, making it one of the largest global firms of its kind. However, Lakshmi Mittal has told investors the combined company will hav…	business	steel firm cut jobs mittal steel largest steel producers cut jobs chief executive netherlandsbased company complete acquisition firm isg month largest global firms lakshmi mittal told investors combined company thousands jobs indianborn magnate job losses fall mittal told investors acquisition international steel completed company aim reduce workforce annually workforce trimmed staff investing mo…	0	1	0	0	4	4	4	4	4	0	0	0	11	11	11	11	0	11	11
Strong demand triggers oil rally Crude oil prices surged back above the $47 a barrel mark on Thursday after an energy market watchdog raised its forecasts for global demand. The International Energy Agency (IEA) warned demand for Opec's crude in the first quarter would outstrip supply. The IEA raised its estimate of 2005 oil demand growth by 80,000 barrels a day to 84 million barrels a day. US li…	business	strong demand triggers oil rally crude oil prices surged barrel mark thursday energy market watchdog raised forecasts global demand international energy agency iea warned demand opec crude quarter outstrip supply iea raised estimate oil demand growth barrels day barrels day light crude rose brent crude london gained parisbased iea watchdog advises industrialized nations energy policy upward revis…	0	1	0	0	4	4	4	4	4	4	4	4	4	4	4	4	4	4	4
UK firm faces Venezuelan land row Venezuelan authorities have said they will seize land owned by a British company as part of President Chavez's agrarian reform programme. Officials in Cojedes state said on Friday that farmland owned by a subsidiary of the Vestey Group would be taken and used to settle poor farmers. The government is cracking down on socalled latifundios, or large rural estates, …	business	uk firm venezuelan land row venezuelan authorities seize land owned british company president chavez agrarian reform programme officials cojedes friday farmland owned subsidiary vestey settle poor farmers government cracking socalled latifundios rural estates lying idle vestey informed planned seizure firm agroflora subsidiary operates farms venezuela insisted complied venezuelan law prosecutors …	0	1	0	0	0	0	0	0	0	0	0	0	0	0	0	0	0	0	0
Soaring oil 'hits world economy' The soaring cost of oil has hit global economic growth, although world's major economies should weather the storm of price rises, according to the OECD. In its latest biannual report, the OECD cut its growth predictions for the world's main industrialised regions. US growth would reach 4.4% in 2004, but fall to 3.3% next year from a previous estimate of 3.7%, the …	business	soaring oil economy soaring cost oil hit global economic growth major economies weather storm price rises oecd biannual report oecd cut growth predictions main industrialised regions growth reach fall previous estimate oecd parisbased economics tank believed global economy regain momentum forecasts japanese growth scaled outlook worst eurozone bloc sluggish growth forecasts slipping oecd report f…	0	1	0	0	4	4	4	4	4	4	4	4	4	4	4	4	11	4	4
Irish markets reach alltime high Irish shares have risen to a record high, with investors persuaded to buy into the market by low inflation and strong growth forecasts. The ISEQ index of leading shares closed up 23 points to 6661.89 on Thursday, fuelled by strong growth in banking and financial stocks. A fall in the rate of inflation to 2.3% in January gave a fresh boost to shares which have adva…	business	irish markets reach alltime irish shares risen record investors persuaded buy market low inflation strong growth forecasts iseq leading shares closed thursday fuelled strong growth banking financial stocks fall rate inflation january fresh boost shares advanced month economy set strong growth rates remain low ireland biggest companies market hit highs thursday allied irish banks ireland biggest c…	0	1	0	0	4	4	4	4	4	4	4	4	4	4	4	4	11	4	4
Japanese banking battle at an end Japan's Sumitomo Mitsui Financial has withdrawn its takeover offer for rival bank UFJ Holdings, enabling the latter to merge with Mitsubishi Tokyo. Sumitomo bosses told counterparts at UFJ of its decision on Friday, clearing the way for it to conclude a 3 trillion yen ($29bn) deal with Mitsubishi. The deal would create the world's biggest bank with assets of abou…	business	japanese banking battle japan sumitomo mitsui financial withdrawn takeover offer rival bank ufj holdings enabling merge mitsubishi tokyo sumitomo bosses told counterparts ufj decision friday clearing conclude trillion yen deal mitsubishi deal create biggest bank assets trillion yen trillion sumitomo exit profile fight japanese bank history ufj holdings japan fourthlargest bank centre fierce bid b…	0	1	0	0	4	4	4	4	4	4	4	4	11	4	11	4	4	4	4
Rich grab half Colombia poor fund Half of the money put aside by the Colombian government to help the country's poor is benefiting people who do not need it, a study has found. A total of 24.2 trillion pesos ($10.2bn; £5.5bn) is earmarked for subsidies for the poor, the government department for planning said. But it also found 12.1 trillion pesos was going to the richest part of the population, …	business	rich grab half colombia poor fund half money colombian government country poor benefiting people study total trillion pesos earmarked subsidies poor government department planning trillion pesos richest population sound distribution cash cut poverty levels government believes resources reduce poverty tax reforms distribution deputy planning director jose leibovich colombia population half lives p…	0	1	0	1	1	1	1	1	1	1	1	1	1	1	1	1	1	1	1
Rover deal 'may cost 2,000 jobs' Some 2,000 jobs at MG Rover's Midlands plant may be cut if investment in the firm by a Chinese car maker goes ahead, the Financial Times has reported. Shanghai Automotive Industry Corp plans to shift production of the Rover 25 to China and export it to the UK, sources close to the negotiations tell the FT. But Rover told BBC News that reports of job cuts were "spe…	business	rover deal cost jobs jobs rover midlands plant cut investment firm chinese car maker ahead financial times reported shanghai automotive industry corp plans shift production rover china export uk sources close negotiations ft rover told bbc news reports job cuts speculation tieup rover chance save longbridge plant pushed uk chancellor gordon brown rover confirmed tieup time rover bosses confident …	0	1	0	0	4	4	4	4	0	0	0	0	11	4	8	15	0	18	0
Ad firm WPP's profits surge 15% UK advertising giant WPP has posted largerthanexpected annual profits and predicted that it will outperform the market in 2005. Pretax profits rose 15% from a year ago to reach £546m ($1.04bn), ahead of average analysts' forecasts of £532m. Revenues were £4.3bn while the firm's operating margins were 14.1%, which it said could reach 14.8% by 2006. During the year W…	business	ad firm wpp profits surge uk advertising giant wpp posted largerthanexpected annual profits predicted outperform market pretax profits rose ago reach ahead average analysts forecasts revenues firm operating margins reach wpp bought rival grey global creating giant rival sector leader omnicom chief executive martin sorrell friday told reuters news agency wpp submitted proposal united business medi…	0	1	0	0	4	4	4	4	0	0	0	0	11	11	11	11	11	11	11
US gives foreign firms extra time Foreign firms have been given an extra year to meet tough new corporate governance regulations imposed by the US stock market watchdog. The Securities and Exchange Commission has extended the deadline to get in line with the rules until 15 July 2006. Many foreign firms had protested that the SEC was imposing an unfair burden. The new rules are the result of the S…	business	foreign firms extra time foreign firms extra meet tough corporate governance regulations imposed stock market watchdog securities exchange commission extended deadline rules july foreign firms protested imposing unfair burden rules result sarbanesoxley cleanup corporate scandals enron worldcom sox legislation nicknamed calls firms certify financial reporting rules firms meet requirements foreignb…	0	1	0	0	0	0	0	0	0	0	0	0	0	0	0	8	0	0	0
Japanese mogul arrested for fraud One of Japan's bestknown businessmen was arrested on Thursday on charges of falsifying shareholder information and selling shares based on the false data. Yoshiaki Tsutsumi was once ranked as the world's richest man and ran a business spanning hotels, railways, construction and a baseball team. His is the latest in a series of arrests of top executives in Japan o…	business	japanese mogul arrested fraud japan bestknown businessmen arrested thursday charges falsifying shareholder selling shares based false data yoshiaki tsutsumi ranked richest business spanning hotels railways construction baseball team series arrests top executives japan business scandals van prince hotels tokyo time tsutsumi untouchable inheriting property business father japan powerful industriali…	0	1	0	0	4	0	0	0	0	0	0	0	0	0	0	8	0	18	18
Deutsche Telekom sees mobile gain German telecoms firm Deutsche Telekom saw strong fourth quarter profits on the back of upbeat US mobile earnings and betterthanexpected asset sales. Net profit came in at 1.4bn euros (£960m; $1.85bn), a dramatic change from the loss of 364m euros in 2003. Sales rose 2.8% to 14.96bn euros. Sales of stakes in firms including Russia's OAO Mobile Telesystems raised 1…	business	deutsche telekom mobile gain german telecoms firm deutsche telekom strong fourth quarter profits upbeat mobile earnings betterthanexpected asset sales net profit euros dramatic change loss euros sales rose euros sales stakes firms including russia oao mobile telesystems raised euros expected helped bring debt euros ago debt euros tmobile usa company american mobile business strong contribution pr…	0	1	0	0	4	4	4	4	4	4	4	4	11	11	11	11	11	11	11
Chinese wine tempts Italy's Illva Italy's Illva Saronno has agreed to buy 33% of Changyu, the largest wine maker in China. Changyu said in a statement to the Shenzhen stock exchange that Illva will pay 481.42m yuan ($58.16m; £30.7m), once the government approves the deal. The Italian liqueur maker will acquire the shares from the Yantai State Asset Management Bureau. Chinese wine sales are growin…	business	chinese wine tempts italy illva italy illva saronno agreed buy changyu largest wine maker china changyu statement shenzhen stock exchange illva pay yuan government approves deal italian liqueur maker acquire shares yantai asset management bureau chinese wine sales growing agriculture department wine sales yuan china encouraging stateowned companies sell shares foreign investors anheuserbusch hein…	0	1	0	0	4	4	4	0	0	0	0	0	0	0	0	0	0	0	0
Umbro profits lifted by Euro 2004 UK sportswear firm Umbro has posted a 222% rise in annual profit after sales of replica England football kits were boosted by the Euro 2004 tournament. Pretax profit for 2004 was £15.4m ($29.4m). Umbro, which recently lost sponsorship deals with Chelsea and Celtic, said on Thursday it had signed a new fouryear agreement with Scottish club Rangers. It hopes 2005 s…	business	umbro profits lifted euro uk sportswear firm umbro posted rise annual profit sales replica england football kits boosted euro tournament pretax profit umbro lost sponsorship deals chelsea celtic thursday signed fouryear agreement scottish club rangers hopes sales benefit launch england replica shirt ahead cup january umbro announced sponsorship agreement chelsea umbro lucrative replica shirts ear…	0	1	0	0	4	4	4	4	4	4	4	4	11	11	11	11	11	11	11
Fed chief warning on US deficit Federal Reserve chairman Alan Greenspan has warned that allowing huge US budget deficits to continue could have "severe" consequences. Speaking to the House Budget Committee he urged Congress to take action to cut the deficit, such as increasing taxes. While the US economy is growing at a "reasonably good pace" he warned that budget concerns were clouding the econo…	business	fed chief warning deficit federal reserve chairman alan greenspan warned allowing huge budget deficits continue severe consequences speaking house budget committee urged congress action cut deficit increasing taxes economy growing pace warned budget concerns clouding economic outlook pension healthcare costs posed risks economy government program severe financial strains coming decades massive ba…	0	1	0	1	4	4	4	4	4	4	4	4	4	4	4	4	1	4	4
UK Coal plunges into deeper loss Shares in UK Coal have fallen after the mining group reported losses had deepened to £51.6m in 2004 from £1.2m. The UK's biggest coal producer blamed geological problems, industrial action and "operating flaws" at its deep mines for its worsening fortunes. The South Yorkshire company, led by new chief executive Gerry Spindler, said it hoped to return to profit in …	business	uk coal plunges deeper loss shares uk coal fallen mining reported losses deepened uk biggest coal producer blamed geological industrial action operating flaws deep mines worsening fortunes south yorkshire company led chief executive gerry spindler hoped return profit trade thursday shares pence uk coal progress shaking business introduced wage structures daily maintenance regime machinery mines m…	0	1	0	0	4	4	4	4	4	0	4	4	11	4	11	8	11	8	4
Saudi ministry to employ women Women will be employed in Saudi Arabia's foreign ministry for the first time this year, Foreign Minister Prince Saud AlFaisal has been reported as saying. The move comes as the conservative country inches open the door to working women. Last year, Crown Prince Abdullah, the defacto ruler, told government departments to put plans in place for employing women. But pro…	business	saudi ministry employ women women employed saudi arabia foreign ministry time foreign minister prince saud alfaisal reported move conservative country inches door women crown prince abdullah defacto ruler told government departments plans employing women progress slow reports country earlier week local arab news labour minister ghazi algosaibi caused uproar ministry difficulty hiring women demand…	0	1	1	1	1	1	1	8	8	8	8	8	12	12	12	12	12	12	12
Japan economy slides to recession The Japanese economy has officially gone back into recession for the fourth time in a decade. Gross domestic product fell by 0.1% in the last three months of 2004. The fall reflects weak exports and a slowdown in consumer spending, and follows similar falls in GDP in the two previous quarters. The Tokyo stock market fell after the figures were announced, but rose…	business	japan economy slides recession japanese economy officially recession fourth time decade gross domestic product fell months fall reflects weak exports slowdown consumer spending falls gdp previous quarters tokyo stock market fell figures announced rose widespread perception economy recover wednesday government revised growth figures earlier account performance period effectively tips japan recessi…	0	1	0	0	4	4	4	4	4	4	4	4	4	4	4	4	11	4	4
US crude prices surge above $53 US crude prices have soared to fresh fourmonth highs above $53 in the US as refinery problems propelled petrol prices to an alltime high. US light sweet crude futures jumped to $53.09 a barrel in New York before closing at $53.03. The gains tracked a surge in US gasoline futures to a record high of $1.4850 a gallon. The jump followed a fire at Western Refining Comp…	business	crude prices surge crude prices soared fresh fourmonth highs refinery propelled petrol prices alltime light sweet crude futures jumped barrel york closing gains tracked surge gasoline futures record gallon jump fire western refining company refinery texas shut petrol production spokesman unable production unit running market simply citigroup global markets analyst kyle cooper told reuters news ag…	0	1	0	0	4	4	4	4	4	4	4	4	4	4	4	4	4	4	4
Industrial output falls in Japan Japanese industrial output fell in October while unemployment rose, casting further doubt on the strength of the country's economic recovery. Production dropped 1.6% in October, reflecting a decline in exports, while unemployment levels edged up 0.1% to 4.7%, slightly higher than forecast. The economy has grown for six quarters but growth slowed dramatically in th…	business	industrial output falls japan japanese industrial output fell october unemployment rose casting doubt strength country economic recovery production dropped october reflecting decline exports unemployment levels edged forecast economy grown quarters growth slowed dramatically quarter amid weaker global demand japan government remains optimistic strong domestic demand analysts forecasting rise mont…	0	1	0	0	4	4	4	4	4	4	4	4	4	4	4	4	11	4	4
Ryanair in $4bn Boeing plane deal Budget airline Ryanair has placed an order for 70 Boeing 737800 planes, in a deal valued at $4bn (£2.1bn) which should lead to 2,500 new Ryanair jobs. It also has an option for a further 70 aircraft, a move which brings the Ryanair/Boeing order book up to 225 firm orders and options on 193 more. Ryanair said the new planes would help it to cut operating costs fur…	business	ryanair boeing plane deal budget airline ryanair boeing planes deal valued lead ryanair jobs option aircraft move brings book firm options ryanair planes cut operating costs carrier reported drop quarterly profit earlier hit fuel costs reported airline upbeat prospects tough competition budget airline market ryanair chairman david bonderman reduced unit operating costs allowed reduce air fares pr…	0	1	0	0	4	4	4	4	4	4	8	8	8	11	8	8	8	8	11
Parmalat to return to stockmarket Parmalat, the Italian dairy company which went bust after an accounting scandal, hopes to be back on the Italian stock exchange in July. The firm gained protection from creditors in 2003 after revealing debts of 14bn euros ($18.34bn; £9.6bn). This was eight times higher than it had previously stated. In a statement issued on Wednesday night, Parmalat Finanziaria …	business	parmalat return stockmarket parmalat italian dairy company bust accounting scandal hopes italian stock exchange july firm gained protection creditors revealing debts euros times stated statement issued wednesday night parmalat finanziaria detailed administrators plans relisting shares relisting italian stock exchange creditors debts expected converted shares share issues amounting euros company c…	0	1	0	0	0	0	0	0	0	0	0	0	11	11	11	11	0	18	18
BMW cash to fuel Mini production Less than four years after the new Mini was launched, German car maker BMW has announced £100m of new investment. Some 200 new jobs are to be created at the Oxford factory, including modernised machinery and a new body shell production building. The result of the investment could be to raise output to more than 200,000 cars from 2007. The rise, from 189,000 last y…	business	bmw cash fuel mini production mini launched german car maker bmw announced investment jobs created oxford factory including modernised machinery body shell production building result investment raise output cars rise response rapidlyrising demand wipe waiting lists wednesday announcement bmw invested mini production launch summer mini strength strength cars sold bmw mini company admits success br…	0	2	0	0	4	4	4	4	4	4	4	4	4	4	7	15	17	7	7
Bad weather hits Nestle sales A combination of bad weather, rising raw material costs and the sluggish European economy has hit sales at Swiss food and drink giant Nestle. Revenue dipped 1.4% to 86.7bn Swiss francs ($74.6bn; £39.1bn) in 2004 as sales of ice cream and mineral water were dampened by the wet summer. However, Nestle's profits margins were helped by a strong performance in the America…	business	bad weather hits nestle sales combination bad weather rising raw material costs sluggish european economy hit sales swiss food drink giant nestle revenue dipped swiss francs sales ice cream mineral water dampened wet summer nestle profits margins helped strong performance americas china nestle raise dividend paying debt nestle strength swiss franc dollar disposal businesses challenging trading co…	0	1	0	0	4	4	4	4	4	4	4	4	4	4	11	11	11	4	4
Fiat mulls Ferrari market listing Ferrari could be listed on the stock market as part of an overhaul of Fiat's carmaking operations, the Financial Times has reported. It said Fiat was set to restructure its business after reaching a $2bn (1.53bn euros; £1.05bn) settlement with GM about Fiat's ownership. Steps being considered include listing Ferrari and bringing Maserati and Alfa Romeo closer tog…	business	fiat mulls ferrari market listing ferrari listed stock market overhaul fiat carmaking operations financial times reported fiat set restructure business reaching euros settlement gm fiat ownership steps considered listing ferrari bringing maserati alfa romeo closer strong sales alfa romeo fiat car business loss proposals paper announced days iconic sportscar maker listed separately market fiat own…	0	0	0	0	0	0	0	0	0	0	0	0	0	0	0	0	0	0	0
Italy to get economic action plan Italian Prime Minister Silvio Berlusconi will unveil plans aimed at kickstarting the country's sputtering economy on Thursday night in Rome. He will present an "Action Plan for the Development of Italy" in a meeting with industrialists and trade union leaders. Mr Berlusconi is expected to table reforms aimed at boosting research and development (RD) spending, and…	business	italy economic action plan italian prime minister silvio berlusconi unveil plans aimed kickstarting country sputtering economy thursday night rome action plan development italy meeting industrialists trade union leaders berlusconi expected table reforms aimed boosting development spending competitiveness firms focus bankruptcy laws slow pace legal system prime minister scheduled start meeting gmt…	0	1	0	0	4	4	4	4	4	4	4	4	4	4	1	1	1	4	4
Weak dollar hits Reuters Revenues at media group Reuters slipped 11% during 2004, mainly due to the weakness of the dollar, the group said. The company said it was optimistic about growth even as revenues slipped 11% from £3.24bn ($6.13bn) in 2003 to £2.89bn in 2004. Reuters beat profit forecasts, posting a 52% rise in profits for the year to £198m from the £130m seen a year earlier. Reuters also…	business	weak dollar hits reuters revenues media reuters slipped weakness dollar company optimistic growth revenues slipped reuters beat profit forecasts posting rise profits earlier reuters beat savings target delivering cuts threeyear fast forward turnaround plan aimed save months december reuters managed slow decline underlying revenues cut debt earlier news financial data seller begun adding expected …	0	1	0	0	4	4	4	4	4	4	4	4	4	11	11	11	11	4	4
Hyundai to build new India plant South Korea's Hyundai Motor has announced that it plans to build a second plant in India to meet the country's growing demand for cars. The company didn't give details of its investment but it said the new plant would produce 150,000 cars a year. This will boost the annual production capacity of the company India's secondlargest car manufacturer to 400,000 units. …	business	hyundai build india plant south korea hyundai motor announced plans build plant india meet country growing demand cars company details investment plant produce cars boost annual production capacity company india secondlargest car manufacturer units hyundai expects sales india grow expects double sales cars plant built close existing chennai southern province tamil nadu south korea top car maker e…	0	1	0	0	4	4	4	4	4	4	4	4	4	4	11	15	11	4	4
SA unveils 'more for all' budget The South African government has put tax cuts and increased social spending at the centre of its latest budget. Aiming to both stir economic growth and aid the country's poor, finance minister Trevor Manuel said the focus of the 2005 budget was "more for all". The tax cuts target firms and individuals, cutting corporate tax from 30% to 29% and offering income tax …	business	sa unveils budget south african government tax cuts increased social spending centre budget aiming stir economic growth aid country poor finance minister trevor manuel focus budget tax cuts target firms individuals cutting corporate tax offering income tax cuts worth rand spending health education rise spending housing sanitation rise spending increases unveiling budget parliament manuel south af…	0	1	0	1	4	4	4	4	1	4	1	1	1	4	1	1	1	1	1
BMW drives record sales in Asia BMW has forecast sales growth of at least 10% in Asia this year after registering record sales there in 2004. The luxury carmaker saw strong sales of its three marques BMW, Mini and RollsRoyce in Asia last year after the launch of three new models. The company, which is vying with MercedesBenz for the title of leading premium carmaker, is confident about its prospe…	business	bmw drives record sales asia bmw forecast sales growth asia registering record sales luxury carmaker strong sales marques bmw mini rollsroyce asia launch models company vying mercedesbenz title leading premium carmaker confident prospects region launching revamped version saloon class month bmw sold cars asia bmwbrand sales rose sales mini models rose increase sales rollsroyces continent bmw sold…	0	1	0	0	4	4	4	4	4	4	4	4	4	4	4	4	11	4	4
Economy 'stronger than forecast' The UK economy probably grew at a faster rate in the third quarter than the 0.4% reported, according to Bank of England deputy governor Rachel Lomax. Private sector business surveys suggest a stronger economy than official estimates, Ms Lomax said. Other surveys collectively show a rapid slowdown in UK house price growth, she pointed out. This means that despite a…	business	economy forecast uk economy grew faster rate quarter reported bank england deputy governor rachel lomax private sector business surveys stronger economy official estimates ms lomax surveys collectively rapid slowdown uk house price growth strong economic growth base rates stay hold official data office national statistics ons reliable ons data takes publish boe calling faster delivery data effect…	0	1	0	4	4	4	4	4	4	4	4	4	4	4	4	4	11	4	4
Electrolux to export Europe jobs Electrolux saw its shares rise 14% on Tuesday after it said it would be shifting more of its manufacturing to lowcost countries. The Swedish firm, the world's largest maker of home appliances, said it is to relocate about 10 of its 27 plants in western Europe and North America. It did not say which facilities would be affected, but intends moving them to Asia, eas…	business	electrolux export europe jobs electrolux shares rise tuesday shifting manufacturing lowcost countries swedish firm largest maker appliances relocate plants western europe north america facilities intends moving asia eastern europe mexico company manufacturing sites county durham lawn garden products newton aycliffe cookers ovens spennymoor newton aycliffe plant electrolux separate announcement sp…	0	1	0	0	4	4	4	4	4	4	0	0	11	11	11	11	0	11	11
Worldcom exboss launches defence Lawyers defending former WorldCom chief Bernie Ebbers against a battery of fraud charges have called a company whistleblower as their first witness. Cynthia Cooper, WorldCom's exhead of internal accounting, alerted directors to irregular accounting practices at the US telecoms giant in 2002. Her warnings led to the collapse of the firm following the discovery of a…	business	worldcom exboss launches defence lawyers defending worldcom chief bernie ebbers battery fraud charges called company whistleblower witness cynthia cooper worldcom exhead internal accounting alerted directors irregular accounting practices telecoms giant warnings led collapse firm discovery accounting fraud ebbers pleaded guilty charges fraud conspiracy prosecution lawyers argued ebbers orchestrat…	0	0	0	0	0	0	0	0	0	0	0	0	0	9	0	11	0	11	11
Insurance bosses plead guilty Another three US insurance executives have pleaded guilty to fraud charges stemming from an ongoing investigation into industry malpractice. Two executives from American International Group (AIG) and one from Marsh McLennan were the latest. The investigation by New York attorney general Eliot Spitzer has now obtained nine guilty pleas. The highest ranking executive p…	business	insurance bosses plead guilty insurance executives pleaded guilty fraud charges stemming ongoing investigation industry malpractice executives american international aig marsh mclennan investigation york attorney eliot spitzer guilty pleas ranking executive pleading guilty tuesday marsh senior vice president joshua bewlay admitted felony count scheming defraud prison marsh spokeswoman bewlay comp…	0	1	0	0	0	0	0	0	0	0	0	0	0	0	0	11	0	18	18
Further rise in UK jobless total The UK's jobless total rose for the second month in a row in December, official figures show. The number of people out of work rose 32,000 to 1.41 million in the last three months of 2004, even as 90,000 more people were in employment. Average earnings rose by 4.3% in the year to December up from November's 4.2%, the Office for National Statistics (ONS) added. Mea…	business	rise uk jobless total uk jobless total rose month row december official figures people rose months people employment average earnings rose december november office national statistics ons benefit claimant total fell month people increased figure records apparent discrepancy rising unemployment record explained increase population fall economically inactive uk jobless rate rose previous quarter ra…	0	1	0	0	4	4	4	4	4	4	4	4	4	4	4	4	11	4	4
Wembley firm won't make a profit Shares in Multiplex Group, which is building the new Wembley stadium, fell as much as 19% after it said it would not make any money on the project. The Australian firm said it would only break even on the 1.2bn Australian dollars (£458m; $874m) rebuild, after a rise in costs on the work. Any profits would depend on the outcome of legal cases resulting from a chang…	business	wembley firm wo profit shares multiplex building wembley stadium fell money project australian firm break australian dollars rebuild rise costs profits depend outcome legal change steel contractor cut profit targets wembley uk project investors shaken news firm shares fell month low recovering close decline multiplex reporting rise pretax profits reaffirming profit forecasts increased costs wembl…	0	1	0	0	4	4	4	4	4	0	4	4	11	11	11	11	11	11	11
Cars pull down US retail figures US retail sales fell 0.3% in January, the biggest monthly decline since last August, driven down by a heavy fall in car sales. The 3.3% fall in car sales had been expected, coming after December's 4% rise in car sales, fuelled by generous preChristmas special offers. Excluding the car sector, US retail sales were up 0.6% in January, twice what some analysts had be…	business	cars pull retail figures retail sales fell january biggest monthly decline august driven heavy fall car sales fall car sales expected coming december rise car sales fuelled generous prechristmas special offers excluding car sector retail sales january analysts expecting retail spending expected rise steve gallagher chief economist sg corporate investment banking january figures decent half pretty…	0	1	0	0	4	4	4	4	4	4	4	4	4	4	11	4	11	4	4
Lufthansa may sue over Bush visit German airline Lufthansa may sue federal agencies for damages after the arrival of US president George W Bush disrupted flights. Lufthansa said that it may lose millions of euros as a result of Air Force One landing at Frankfurt airport. Flights were affected for an hour on Wednesday morning, double the time that had been expected, leading to cancellations and de…	business	lufthansa sue bush visit german airline lufthansa sue federal agencies damages arrival president george bush disrupted flights lufthansa lose millions euros result air force landing frankfurt airport flights hour wednesday morning double time expected leading cancellations delays lufthansa accounts planes frankfurt airport possibilities michael lamberty lufthansa spokesman told bbc checking actio…	0	1	0	0	0	4	6	8	8	8	8	8	8	8	8	8	8	8	8
EU aiming to fuel development aid European Union finance ministers meet on Thursday to discuss proposals, including a tax on jet fuel, to boost development aid for poorer nations. The policy makers are to ask for a report into how more development money can be raised, the EU said. The world's richest countries have said they want to increase the amount of aid they give to 0.7% of their annual gro…	business	eu aiming fuel development aid european union finance ministers meet thursday proposals including tax jet fuel boost development aid poorer nations policy makers report development money raised eu richest countries increase amount aid annual gross national income airlines reacted proposed fuel levy profits pressure airline industry lowcost firms driving prices demand dipping september terrorist a…	0	1	0	0	4	4	1	1	4	8	8	8	8	8	8	8	8	8	8
German business confidence slides German business confidence fell in February knocking hopes of a speedy recovery in Europe's largest economy. Munichbased research institute Ifo said that its confidence index fell to 95.5 in February from 97.5 in January, its first decline in three months. The study found that the outlook in both the manufacturing and retail sectors had worsened. Observers had be…	business	german business confidence slides german business confidence fell february knocking hopes speedy recovery europe largest economy munichbased institute ifo confidence fell february january decline months study outlook manufacturing retail sectors worsened observers hoping confident business sector signal economic activity picking surprised ifo knock dz bank economist bernd weidensteiner main reaso…	0	1	0	0	4	4	4	4	4	4	4	4	4	4	4	4	11	4	4
FAO warns on impact of subsidies Billions of farmers' livelihoods are at risk from falling commodity prices and protectionism, the UN's Food Agriculture Organisation has warned. Trade barriers and subsidies "severely" distort the market, the FAO report on the "State of Agricultural Commodity Markets 2004" said. As a result, the 2.5 billion people in the developing world who rely on farming face f…	business	fao warns impact subsidies billions farmers livelihoods risk falling commodity prices protectionism food agriculture organisation warned trade barriers subsidies severely distort market fao report agricultural commodity markets result billion people developing rely farming food insecurity endangered live leastdeveloped countries fao report support farmers industrialised nations equivalent times a…	0	1	0	0	0	4	6	8	4	8	8	8	8	8	8	8	8	8	4
India seeks to boost construction India has cleared a proposal allowing up to 100% foreign direct investment in its construction sector. Kamal Nath, Commerce and Industry Minister, announced the decision in Delhi on Thursday following a cabinet meeting. Analysts say improving India's infrastructure will boost foreign investment in other sectors too. The Indian government's decision has spread goo…	business	india seeks boost construction india cleared proposal allowing foreign direct investment construction sector kamal nath commerce industry minister announced decision delhi thursday cabinet meeting analysts improving india infrastructure boost foreign investment sectors indian government decision spread cheer construction sector indian firms spokesman dlf builders dr vancheshwar told bbc offerings…	0	1	0	0	4	4	0	0	0	0	0	0	8	0	0	8	0	8	0
Boeing unveils new 777 aircraft US aircraft firm Boeing has unveiled its new longdistance 777 plane, as it tries to regain its position as the industry's leading manufacturer. The 777200LR will be capable of flying almost 11,000 miles nonstop, linking cities such as London and Sydney. Boeing, in contrast to European rival Airbus, hopes airlines will want to fly smaller aircraft over longer distan…	business	boeing unveils aircraft aircraft firm boeing unveiled longdistance plane regain position industry leading manufacturer capable flying miles nonstop linking cities london sydney boeing contrast european rival airbus hopes airlines fly aircraft distances airbus overtook boeing civilian planemaker focusing socalled super jumbos analysts divided approach tussle boeing airbus prove defining moment air…	0	1	0	0	0	4	7	8	8	8	8	8	8	7	8	8	7	8	7
Circuit City gets takeover offer Circuit City Stores, the secondlargest electronics retailer in the US, has received a $3.25bn (£1.7bn) takeover offer. The bid has come from Bostonbased private investment firm Highfields Capital Management, which already owns 6.7% of Circuit City's shares. Shares in the retailer were up 19.6% at $17.04 in Tuesday morning trading in New York following the announce…	business	circuit city takeover offer circuit city stores secondlargest electronics retailer received takeover offer bid bostonbased private investment firm highfields capital management owns circuit city shares shares retailer tuesday morning trading york announcement highfield intends virginiabased firm private transformation eliminate publiccompany transparency company operating strategy uniquely damagi…	0	1	0	0	4	4	4	0	0	0	11	0	11	11	11	11	0	11	11
Japan turns to beer alternatives Japanese brewers are increasingly making money from beerflavoured drinks rather than beer itself Beer and spirits are heavily taxed in Japan, driving breweries to search for alternatives. Japan's long economic downturn helped drive the trend, as drinkers looked for cheaper opportunities to drown their sorrows. Now, according to Asahi Breweries, the market for soca…	business	japan beer alternatives japanese brewers increasingly money beerflavoured drinks beer beer spirits heavily taxed japan driving breweries search alternatives japan economic downturn helped drive trend drinkers looked cheaper opportunities drown sorrows asahi breweries market socalled beerlike drinks set grow asahi predicting profits rise launches drink based soybean peptides malt chosen shinnama d…	0	1	0	0	4	4	4	4	4	4	4	4	4	4	4	4	11	15	15
S Korean consumers spending again South Korea looks set to sustain its revival thanks to renewed private consumption, its central bank says. The country's economy has suffered from an overhang of personal debt after its consumers' credit card spending spree. Card use fell sharply last year, but is now picking up again with a rise in spending of 14.8% yearonyear. "The economy is now heading upward…	business	korean consumers spending south korea set sustain revival renewed private consumption central bank country economy suffered overhang personal debt consumers credit card spending spree card fell sharply picking rise spending yearonyear economy heading upward downward central bank governor park seung worst passed park statement bank decided rates alltime low cut rates november revive economy rising…	0	1	0	0	4	4	4	4	4	4	4	4	4	4	4	4	11	4	4
German growth goes into reverse Germany's economy shrank 0.2% in the last three months of 2004, upsetting hopes of a sustained recovery. The figures confounded hopes of a 0.2% expansion in the fourth quarter in Europe's biggest economy. The Federal Statistics Office said growth for the whole of 2004 was 1.6%, after a year of contraction in 2003, down from an earlier estimate of 1.7%. It said grow…	business	german growth reverse germany economy shrank months upsetting hopes sustained recovery figures confounded hopes expansion fourth quarter europe biggest economy federal statistics office growth contraction earlier estimate growth quarter putting economy standstill july onward germany reliant exports economy track unemployment impending cuts welfare german consumers money major companies including …	0	1	0	0	4	4	4	4	4	4	4	4	4	4	4	4	11	4	4
TurkeyIran mobile deal 'at risk' Turkey's investment in Iran's mobile industry looks set to be scrapped after its biggest mobile firm saw its investment there slashed by MPs. Iran's parliament voted by a large majority to cut Turkcell's stake in a new mobile network from 70% to 49%. The move, which was justified on national security grounds, follows an earlier vote by MPs to give themselves a vet…	business	turkeyiran mobile deal risk turkey investment iran mobile industry set scrapped biggest mobile firm investment slashed mps iran parliament voted majority cut turkcell stake mobile network move justified national security grounds earlier vote mps veto foreign investments turkcell decision increases risks attached project company statement continue monitor developments observers turkcell set pull d…	1	1	0	0	4	4	0	0	0	0	0	0	4	0	4	4	0	4	8
EU ministers to mull jet fuel tax European Union finance ministers are meeting on Thursday in Brussels, where they are to discuss a controversial jet fuel tax. A levy on jet fuel has been suggested as a way to raise funds to finance aid for the world's poorest nations. Airlines and aviation bodies have reacted strongly against the plans, saying they would hurt companies at a time when earnings ar…	business	eu ministers mull jet fuel tax european union finance ministers meeting thursday brussels controversial jet fuel tax levy jet fuel suggested raise funds finance aid poorest nations airlines aviation bodies reacted plans hurt companies time earnings pressure eu tax passed consultation airlines keen earlier week tax jet fuel hurt competitiveness airlines ministers discussing reforms regulations gov…	0	1	0	0	4	4	4	1	4	4	4	1	8	8	8	8	8	8	8
Palestinian economy in decline Despite a shortlived increase in Palestinian jobs in 2003, the economy is performing well below its potential, said a World Bank report. Unemployment stood at 25%, compared with 10% before the uprising against Israeli occupation four years ago. Young people are particularly hard hit with 37% out of work, compared with 14% four years ago. But 104,000 new jobs were cr…	business	palestinian economy decline shortlived increase palestinian jobs economy performing potential bank report unemployment stood compared uprising israeli occupation ago people hard hit compared ago jobs created easing violence closures half palestinian economy lost jobs growth rate attributed temporary gap violence report report intifada closures palestinian economic crisis assessment close link clo…	0	1	1	1	1	1	1	4	4	4	4	4	1	8	8	1	11	8	4
China had role in Yukos splitup China lent Russia $6bn (£3.2bn) to help the Russian government renationalise the key Yuganskneftegas unit of oil group Yukos, it has been revealed. The Kremlin said on Tuesday that the $6bn which Russian state bank VEB lent stateowned Rosneft to help buy Yugansk in turn came from Chinese banks. The revelation came as the Russian government said Rosneft had signed a…	business	china role yukos splitup china lent russia russian government renationalise key yuganskneftegas unit oil yukos revealed kremlin tuesday russian bank veb lent stateowned rosneft buy yugansk chinese banks revelation russian government rosneft signed longterm oil supply deal china deal rosneft receive credits china cnpc russian newspaper vedomosti credits pay loans rosneft received finance purchase …	0	1	0	0	0	0	0	0	0	0	0	0	0	0	0	0	0	0	0
Deadline nears for FiatGM deal Fiat and General Motors (GM) have until midnight on 1 February to settle a disagreement over a potential takeover. The deadline marks the point at which Fiat will gain the right to sell its car division to GM, part of an alliance agreed in 2000. GM, whose own European operations are losing money, no longer wants to own the unprofitable Fiat unit. Reports of deadlock…	business	deadline nears fiatgm deal fiat motors gm midnight february settle disagreement potential takeover deadline marks fiat gain sell car division gm alliance agreed gm european operations losing money unprofitable fiat unit reports deadlocked talks fiat shares tuesday monday gain hopes payoff firm offering extricate arrangement argued deal voided fiat decision sell fiat finance arm halve gm stake cap…	0	0	0	0	4	4	0	0	0	0	0	0	0	0	0	8	0	0	0
ID theft surge hits US consumers Almost a quarter of a million US consumers complained of being targeted for identity theft in 2004, official figures suggest. The Federal Trade Commission said two in five of the 635,173 reports it had from consumers concerned ID fraud. ID theft occurs when criminals use someone else's personal information to steal credit or commit other crimes. Internet auctions …	business	theft surge hits consumers quarter consumers complained targeted identity theft official figures federal trade commission reports consumers concerned fraud theft occurs criminals personal steal credit commit crimes internet auctions biggest source fraud complaints comprising total total cost fraud reported consumers report marks row identity fraud topped table biggest slice fraud reported concern…	1	1	0	0	0	0	3	3	3	3	3	3	3	3	3	3	3	3	3
Argentina, Venezuela in oil deal Argentina and Venezuela have extended a foodforoil deal, which helped the former to overcome a severe energy crisis last year. Argentine President Nestor Kirchner and Venezuelan President Hugo Chavez signed the deal in Buenos Aires on Tuesday. Last April, Argentina signed a $240m agreement to import Venezuelan fuel in exchange for agricultural goods and this deal …	business	argentina venezuela oil deal argentina venezuela extended foodforoil deal helped overcome severe energy crisis argentine president nestor kirchner venezuelan president hugo chavez signed deal buenos aires tuesday april argentina signed agreement import venezuelan fuel exchange agricultural deal extended venezuela import cattle medicines medical equipment argentina severe energy crisis forced pres…	0	1	0	0	4	4	0	0	0	0	0	0	0	4	0	0	4	18	0
BMW to recall faulty diesel cars BMW is to recall all cars equipped with a faulty diesel fuelinjection pump supplied by parts maker Robert Bosch. The faulty part does not represent a safety risk and the recall only affects pumps made in December and January. BMW said that it was too early to say how many cars were affected or how much the recall would cost. The German company is to extend a plann…	business	bmw recall faulty diesel cars bmw recall cars equipped faulty diesel fuelinjection pump supplied maker robert bosch faulty represent safety risk recall pumps december january bmw cars recall cost german company extend planned production break plants faulty bosch dingolfing site closed week days additional threeday stoppage production loss vehicles bmw adding confident bosch stopped production exp…	0	0	0	0	4	4	4	4	4	4	4	4	4	4	8	8	4	4	4
Takeover rumour lifts Exel shares Shares in storage and delivery firm Exel closed up 9% at a twoandahalf year high on Tuesday on speculation it is to receive an imminent takeover bid. The talk in the City is that US giant United Parcel Services (UPS) is the most likely bidder for the firm. Yet other names mentioned in connection to buying Exel are DHLowner Deutsche Post and finance firm GE Capita…	business	takeover rumour lifts exel shares shares storage delivery firm exel closed twoandahalf tuesday speculation receive imminent takeover bid talk city giant united parcel services bidder firm names mentioned connection buying exel dhlowner deutsche post finance firm ge capital shares closing tuesday bracknellbased exel valued exel employs people countries active consolidation logistics sector paying …	0	1	0	0	4	4	0	0	0	0	0	0	11	11	11	11	0	11	11
Yukos accused of lying to court Russian oil firm Yukos lied to a US court in an attempt to stop the Russian government selling off its key production unit, the court has heard. The unit, Yugansk, was sold to pay off a $27.5bn (£14.5bn) back tax bill. Yukos argued that since it had a US subsidiary and local bank accounts, the US court could declare it bankrupt and stop the auction of Yugansk. But …	business	yukos accused lying court russian oil firm yukos lied court attempt russian government selling key production unit court heard unit yugansk sold pay tax bill yukos argued subsidiary local bank accounts court declare bankrupt auction yugansk deutsche bank target yukos lawsuit documents backdated strengthen deutsche bank evidence day twoday hearing houston lawyer hugh ray told court yukos claimed t…	0	0	0	0	0	0	0	0	0	0	0	0	0	0	0	0	0	0	0
Mexican in US send $16bn home Mexican labourers living in the US sent a record $16.6bn (£8.82bn) home last year. The Bank of Mexico said that remittances grew 24% last year and now represent the country's secondbiggest source of income after oil. Better records and greater prosperity of Mexican expatriates in the US are the main reasons behind the increase. About 10 million Mexicans live in the U…	business	mexican send mexican labourers living record bank mexico remittances grew represent country secondbiggest source income oil records prosperity mexican expatriates main reasons increase mexicans live citizens mexican origin remittances represent country gdp bank mexico figures transactions average remittance bank standard poor upgraded mexico sovereign debt rating rise remittances helps protect me…	0	1	0	0	4	4	4	4	4	4	4	4	4	4	13	4	11	4	4
Home loan approvals rising again The number of mortgages approved in the UK has risen for the first time since May last year, according to lending figures from the Bank of England. New loans in December rose to 83,000, slightly higher than November's nineyear low of 77,000. Mortgage lending rose by £7.1bn in December, up from a £6.4bn rise in November. The figures contradict a survey from the Bri…	business	loan approvals rising mortgages approved uk risen time lending figures bank england loans december rose november nineyear low mortgage lending rose december rise november figures contradict survey british bankers association approvals fiveyear low analysts figures market stabilising house price softness modest rise mortgage approvals lending december reinforces impression housing market slowing s…	0	1	0	0	4	4	4	4	4	4	4	4	4	4	4	4	11	4	4
Manufacturing recovery 'slowing' UK manufacturing grew at its slowest pace in oneandahalf years in January, according to a survey. The Chartered Institute of Purchasing and Supply (CIPS) said its purchasing manager index (PMI) fell to 51.8 from a revised 53.3 in December. But, despite missing forecasts of 53.7, the PMI number remained above 50 indicating expansion in the sector. The CIPS said tha…	business	manufacturing recovery uk manufacturing grew slowest pace oneandahalf january survey chartered institute purchasing supply cips purchasing manager pmi fell revised december missing forecasts pmi remained indicating expansion sector cips strong pound dented exports rising oil metals prices costs survey rising input prices cooling demand deterred factory managers hiring workers effort cut costs tri…	0	1	0	4	4	4	4	4	4	4	4	4	4	4	4	4	11	4	4
Worldcom boss 'left books alone' Former Worldcom boss Bernie Ebbers, who is accused of overseeing an $11bn (£5.8bn) fraud, never made accounting decisions, a witness has told jurors. David Myers made the comments under questioning by defence lawyers who have been arguing that Mr Ebbers was not responsible for Worldcom's problems. The phone company collapsed in 2002 and prosecutors claim that loss…	business	worldcom boss books worldcom boss bernie ebbers accused overseeing fraud accounting decisions witness told jurors david myers comments questioning defence lawyers arguing ebbers responsible worldcom phone company collapsed prosecutors claim losses hidden protect firm shares myers pleaded guilty fraud assisting prosecutors monday defence lawyer reid weingarten distance client allegations cross exa…	0	0	0	0	0	0	0	0	0	0	0	0	0	9	0	11	0	11	11
Metlife buys up Citigroup insurer US banking giant Citigroup has sold its Travelers Life Annuity insurance arm to Metlife for $11.5bn (£6.1bn). The sale is a further move by Citigroup away from its 1990s strategy of offering every financial service insurance, broking and banking. Profit growth in the insurance market has not matched expansion at Citigroup's other businesses. For Metlife, the US's…	business	metlife buys citigroup insurer banking giant citigroup sold travelers life annuity insurance arm metlife sale move citigroup strategy offering financial service insurance broking banking profit growth insurance market matched expansion citigroup businesses metlife leading insurance company purchase access larger distribution network robert benmosche metlife chairman chief executive opportunity br…	0	1	0	0	0	0	0	0	0	0	0	0	11	11	11	11	11	11	11
Europe blames US over weak dollar European leaders have openly blamed the US for the sharp rise in the value of the euro. US officials were talking up the dollar, they said, but failing to take action to back up their words. Meeting in Brussels, finance ministers of the 12 eurozone countries voiced their concern that the rise of the european currency was harming exports. The dollar is within touc…	business	europe blames weak dollar european leaders openly blamed sharp rise euro officials talking dollar failing action meeting brussels finance ministers eurozone countries voiced concern rise european currency harming exports dollar touching distance alltime low reached earlier november gmt tuesday dollar euro buying yen tokyo rallied monday amid signs oil prices easing analysts respite temporary euro…	0	1	0	0	4	4	4	4	4	4	4	4	4	4	4	4	11	4	4
French wine gets 70m euro topup The French government is to hand its struggling wine industry 70m euros ($91m) in aid to help it battle falling sales and damaging overproduction. The financial package is aimed at assisting vintners in financial trouble and improving how its wine is marketed. The French wine industry, the world's second largest, has been hit by declining consumption at home and th…	business	french wine euro topup french government hand struggling wine industry euros aid battle falling sales damaging overproduction financial package aimed assisting vintners financial trouble improving wine marketed french wine industry largest hit declining consumption growing popularity wines wine makers claimed support package announced agriculture minister dominique bussereau talks vintners repres…	0	1	0	0	4	4	4	0	0	0	0	0	8	8	11	8	0	8	11
Russia gets investment blessing Soaring oil sales and a budget surplus mean Russian debt is no longer a risky investment, one of the world's leading credit rating agencies says. Standard Poor's has classed Russian bonds as "investment grade", up from their former "speculative" rating. Russia's reputation among investors has been hurt in recent months by the heavy tax bills and asset seizures impo…	business	russia investment blessing soaring oil sales budget surplus russian debt risky investment leading credit rating agencies standard poor classed russian bonds investment grade speculative rating russia reputation investors hurt months heavy tax bills asset seizures imposed companies oil giant yukos sp solidity government finances outweighed risk russia net creditor debtor gold foreign currency rese…	0	1	0	0	0	0	0	0	0	0	0	0	0	0	0	0	0	0	0
Iranian MPs threaten mobile deal Turkey's biggest private mobile firm could bail out of a $3bn ($1.6bn) deal to build a network in Iran after MPs there slashed its stake in the project. Conservatives in parliament say Turkcell's stake in Irancell, the new network, should be cut from 70% to 49%. They have already given themselves a veto over all foreign investment deals, following allegations abou…	business	iranian mps threaten mobile deal turkey biggest private mobile firm bail deal build network iran mps slashed stake project conservatives parliament turkcell stake irancell network cut veto foreign investment deals allegations turkish firms involvement israel turkcell deal altogether iran heavily congested mobile network waiting lists subscribers turkcell signed contract network september operator…	0	1	0	0	0	0	0	0	0	0	0	0	0	0	0	11	0	4	8
Argentina closes $102.6bn debt swap Argentina is set to close its $102.6bn (£53.51bn) debt restructuring offer for bondholders later on Friday, with the government hopeful that most creditors will accept the deal. The estimated loss to bondholders is up to 70% of the original value of the bonds, yet the majority are expected to accept the government's offer. Argentina defaulted on its debt three …	business	argentina closes debt swap argentina set close debt restructuring offer bondholders friday government hopeful creditors accept deal estimated loss bondholders original bonds majority expected accept government offer argentina defaulted debt ago biggest sovereign default modern history yesterday argentina economy minister roberto lavagna estimated restructuring ready thursday march argentina presi…	0	1	0	0	4	4	4	0	0	0	0	0	4	4	11	0	11	4	4
US economy shows solid GDP growth The US economy has grown more than expected, expanding at an annual rate of 3.8% in the last quarter of 2004. The gross domestic product figure was ahead of the 3.1% the government estimated a month ago. The rise reflects stronger spending by businesses on capital equipment and a smallerthanexpected trade deficit. GDP is a measure of a country's economic health, …	business	economy solid gdp growth economy grown expected expanding annual rate quarter gross domestic product figure ahead government estimated month ago rise reflects stronger spending businesses capital equipment smallerthanexpected trade deficit gdp measure country economic health reflecting services produces gdp figure announced commerce department friday topped growth rate economists forecast ahead f…	0	1	0	0	4	4	4	4	4	4	4	4	4	4	4	4	11	4	4
Profits slide at India's Dr Reddy Profits at Indian drugmaker Dr Reddy's fell 93% as research costs rose and sales flagged. The firm said its profits were 40m rupees ($915,000; £486,000) for the three months to December on sales which fell 8% to 4.7bn rupees. Dr Reddy's has built its reputation on producing generic versions of bigname pharmaceutical products. But competition has intensified and t…	business	profits slide india dr reddy profits indian drugmaker dr reddy fell costs rose sales flagged firm profits rupees months december sales fell rupees dr reddy built reputation producing generic versions bigname pharmaceutical products competition intensified firm company short product launches annoucement december won exclusive marketing rights generic version famous antidepressant prozac maker eli …	0	1	0	0	4	4	4	4	4	4	4	4	4	11	11	11	11	11	11
Burren awarded Egyptian contracts British energy firm Burren Energy has been awarded two potentially lucrative oil exploration contracts in Egypt. The company successfully bid for the two contracts, granted by government owned oil firms, covering onshore and offshore areas in the Gulf of Suez. Burren Energy already has a presence in Egypt, having been awarded an exploration contract last year. Th…	business	burren awarded egyptian contracts british energy firm burren energy awarded lucrative oil exploration contracts egypt company bid contracts granted government owned oil firms covering onshore offshore gulf suez burren energy presence egypt awarded exploration contract firm floated announced deal buy indian firm hindustan oil exploration deal burren energy access indian oil gas industry contract e…	0	1	0	0	0	0	0	0	0	0	0	0	0	0	0	0	0	0	0
Strong dollar' call halts slide The US dollar's slide against the euro and yen has halted after US Treasury Secretary John Snow said a strong dollar was "in America's interest". But analysts said any gains are likely to be shortlived as problems with the US economy were still significant. They also pointed out that positive comments apart, President George W Bush's administration had done little …	business	strong dollar call halts slide dollar slide euro yen halted treasury secretary john snow strong dollar america analysts gains shortlived economy positive comments president george bush administration dollar slide weak dollar helps boost exports narrow current account deficit dollar trading euro close record level set november japanese yen trading yen hitting sevenmonth low earlier day policy make…	0	1	0	0	4	4	4	4	4	4	4	4	4	4	4	4	11	4	4
IMF 'cuts' German growth estimate The International Monetary Fund is to cut its 2005 growth forecast for the German economy from 1.8% to 0.8%, the Financial Times Deutschland reported. The IMF will also reduce its growth estimate for the 12member eurozone economy from 2.2% to 1.6%, the newspaper reported. The German economy has been faltering, with unemployment levels rising to a seventyyear high…	business	imf german growth estimate international monetary fund cut growth forecast german economy financial times deutschland reported imf reduce growth estimate eurozone economy newspaper reported german economy faltering unemployment levels rising seventyyear sluggish performance continues hamper entire eurozone imf draft economic outlook published april marked deterioration germany economy ft report s…	0	1	0	0	4	4	4	4	4	4	4	4	4	4	4	4	11	4	4
GM, Ford cut output as sales fall US car firms General Motors (GM) and Ford have been forced to cut production in the face of falling car sales. US sales at GM sank 12.7% in February compared to a year ago while Ford sales dropped 3% as foreign rivals took a bigger share of the market. Meanwhile, Asian carmakers fared well Toyota sales jumped 11% while rival Nissan notched up a 10% increase. Over…	business	gm ford cut output sales fall car firms motors gm ford forced cut production falling car sales sales gm sank february compared ago ford sales dropped foreign rivals bigger share market asian carmakers fared toyota sales jumped rival nissan notched increase sales industry fell vehicles earlier gm ford blamed fuel prices low sales trucks gasguzzling sports utility vehicles suvs vehicles provide big…	0	1	0	0	4	4	4	4	4	4	4	4	4	4	11	4	11	4	4
Ebbers denies WorldCom fraud Former WorldCom chief Bernie Ebbers has denied claims that he knew accountants were doctoring the books at the firm. Speaking in court, Mr Ebbers rejected allegations he pressured exchief financial officer Scott Sullivan to falsify company financial statements. Mr Sullivan "made accounting decisions," he told the federal court, saying his finance chief had "a keen com…	business	ebbers denies worldcom fraud worldcom chief bernie ebbers denied claims accountants doctoring books firm speaking court ebbers rejected allegations pressured exchief financial officer scott sullivan falsify company financial statements sullivan accounting decisions told federal court finance chief keen command ebbers denied charges fraud conspiracy day questioning york trial ebbers played relatio…	0	0	0	0	0	0	0	0	0	0	0	0	0	0	0	11	0	18	18
Australia rates at four year high Australia is raising its benchmark interest rate to its highest level in four years despite signs of a slowdown in the country's economy. The Reserve Bank of Australia lifted interest rates 0.25% to 5.5%, their first upwards move in more than a year. However, shortly after the Bank made its decision, new figures showed a fall in economic growth in the last quarte…	business	australia rates australia raising benchmark rate level signs slowdown country economy reserve bank australia lifted rates upwards move shortly bank decision figures fall economic growth quarter bank acted curb inflation move criticised analysts rate hike december wellflagged advance opposition parties analysts move illtimed data australian economy grew october december annual basis figures repres…	0	1	0	0	4	4	4	4	4	4	4	4	4	4	4	4	11	4	4
US company admits Benin bribery A US defence and telecommunications company has agreed to pay $28.5m after admitting bribery in the West African state of Benin. The Titan corporation was accused of funnelling more than $2m into the 2001 reelection campaign of President Mathieu Kerekou. At the time, Titan was trying to get a higher price for a telecommunications project in Benin. There is no sugge…	business	company admits benin bribery defence telecommunications company agreed pay admitting bribery west african benin titan corporation accused funnelling reelection campaign president mathieu kerekou time titan price telecommunications project benin suggestion kerekou aware wrongdoing titan californiabased company pleaded guilty falsifying accounts violating antibribery laws agreed pay criminal penalt…	0	1	0	0	0	0	0	0	0	0	0	0	0	0	0	0	0	18	18
US insurer Marsh cuts 2,500 jobs Up to 2,500 jobs are to go at US insurance broker Marsh McLennan in a shake up following biggerthanexpected losses. The insurer said the cuts were part of a costcutting drive, aimed at saving millions of dollars. Marsh posted a $676m (£352m) loss for the last three months of 2004, against a $375m (£195.3m) profit a year before. It blamed an $850m payout to settle …	business	insurer marsh cuts jobs jobs insurance broker marsh mclennan shake biggerthanexpected losses insurer cuts costcutting drive aimed saving millions dollars marsh posted loss months profit blamed payout settle pricerigging lawsuit brought york attorney elliot spitzer settlement announced january marsh pretax charge octobertodecember quarter top charge previous quarter difficult mmc financial history…	0	1	0	0	0	0	0	0	0	0	0	0	0	0	11	11	11	18	18
US seeks new $280bn smoker ruling The US Justice Department is to try to overturn a court ruling that threw out its claim for $280bn (£149bn) in damages from tobacco firms. Earlier this month, a threejudge appeal court panel rejected the claim filed in 1999 by the administration of Bill Clinton in a 21 decision. Government lawyers said they would ask the full US Court of Appeals for the District …	business	seeks smoker ruling justice department overturn court ruling threw claim damages tobacco firms earlier month threejudge appeal court panel rejected claim filed administration bill clinton decision government lawyers court appeals district columbia hear court battle key government attempts fight smoking pretty suffered severe setback anthony sebok professor brooklyn law school adding appeal govern…	1	1	0	0	0	0	0	0	0	0	0	0	0	0	0	0	0	18	18
Budget Aston takes on Porsche British car maker Aston Martin has gone headtohead with Porsche's 911 sports cars with the launch of its cheapest model yet. With a price tag under £80,000, the V8 Vantage is tens of thousands of pounds cheaper than existing Aston models. The Vantage is "the most important car in the history of our company", said Aston's chief executive Ulrich Bez. Aston whose cars w…	business	budget aston takes porsche british car maker aston martin headtohead porsche sports cars launch cheapest model price tag vantage tens thousands pounds cheaper existing aston models vantage car history company aston chief executive ulrich bez aston cars famously james bond unveil vantage geneva motor thursday bez executive rival porsche car company affordable car brand accessible aston martin glob…	0	2	3	4	4	4	4	4	4	4	4	4	13	4	13	13	4	13	7
Golden rule 'intact' says exaide Chancellor Gordon Brown will meet his golden economic rule "with a margin to spare", according to his former chief economic adviser. Formerly one of Mr Brown's closest Treasury aides, Ed Balls hinted at a Budget giveaway on 16 March. He said he hoped more would be done to build on current tax credit rules. Any rate rise ahead of an expected May election would not …	business	golden rule exaide chancellor gordon brown meet golden economic rule margin spare chief economic adviser brown closest treasury aides balls hinted budget giveaway march hoped build current tax credit rules rate rise ahead expected election affect labour party chances winning july balls won step treasury position parliament defending labour stronghold normanton west yorkshire balls rejected allega…	1	1	1	1	1	1	1	1	1	1	1	1	1	1	1	1	1	1	1
Liberian economy starts to grow The Liberian economy started to grow in 2004, but "sustained and deep reform efforts" are needed to ensure long term growth, the International Monetary Fund (IMF) has said. An IMF mission made the comments in a report published following 10 days of talks with the transition government. The IMF said that, according to data provided by the Liberians, the country's GD…	business	liberian economy starts grow liberian economy started grow sustained deep reform efforts ensure term growth international monetary fund imf imf mission comments report published days talks transition government imf data provided liberians country gdp rose decline liberia recovering civil war powersharing national transition government liberia remain elections october presidential parliamentary ba…	0	1	0	0	4	4	4	4	4	4	4	4	4	4	4	4	11	4	4
Slowdown hits US factory growth US industrial production increased for the 21st month in a row in February, but at a slower pace than in January, official figures show. The Institute for Supply Management (ISM) index fell to 55.3 in February, from an adjusted 56.4 in January. Although the index was lower than in January, the fact that it held above 50 shows continued growth in the sector. "Februa…	business	slowdown hits factory growth industrial production increased month row february slower pace january official figures institute supply management ism fell february adjusted january lower january held continued growth sector february month manufacturing sector ism survey chairman norbert rate growth slowing picture improving price increases shortages exports imports remain strong analysts expected …	0	1	0	0	4	4	4	4	4	4	4	4	4	4	4	4	11	4	4
Lufthansa flies back to profit German airline Lufthansa has returned to profit in 2004 after posting huge losses in 2003. In a preliminary report, the airline announced net profits of 400m euros ($527.61m; £274.73m), compared with a loss of 984m euros in 2003. Operating profits were at 380m euros, ten times more than in 2003. Lufthansa was hit in 2003 by tough competition and a dip in demand foll…	business	lufthansa flies profit german airline lufthansa returned profit posting huge losses preliminary report airline announced net profits euros compared loss euros operating profits euros ten times lufthansa hit tough competition dip demand iraq war killer sars virus hit troubles catering business lufthansa signs recovery european airlines teetering brink bankruptcy board lufthansa recommended paying …	0	1	0	0	4	4	4	4	4	4	4	4	11	11	11	11	11	11	11
Japanese growth grinds to a halt Growth in Japan evaporated in the three months to September, sparking renewed concern about an economy not long out of a decadelong trough. Output in the period grew just 0.1%, an annual rate of 0.3%. Exports the usual engine of recovery faltered, while domestic demand stayed subdued and corporate investment also fell short. The growth falls well short of expectat…	business	japanese growth grinds halt growth japan evaporated months september sparking renewed concern economy decadelong trough output period grew annual rate exports usual engine recovery faltered domestic demand stayed subdued corporate investment fell short growth falls short expectations mark sixth straight quarter expansion economy stagnated experiencing spurts expansion amid periods doldrums result…	0	1	0	0	4	4	4	4	4	4	4	4	4	4	4	4	11	4	4
Unilever shake up as profit slips AngloDutch consumer goods giant Unilever is to merge its two management boards after reporting "unsatisfactory" earnings for 2004. It blamed the poor results on sluggish decision making, a rise in discounted retailers and a wet European summer. The company also cited difficult trading conditions and a lack of demand for goods such as its Slimfast range. Unilever,…	business	unilever shake profit slips anglodutch consumer giant unilever merge management boards reporting unsatisfactory earnings blamed poor sluggish decision rise discounted retailers wet european summer company cited difficult trading conditions lack demand slimfast range unilever owns brands including dove soap annual pretax profit fell euros shares fell pence london dropped euros amsterdam restructur…	0	1	0	0	4	4	4	4	4	4	4	4	11	11	11	11	11	11	11
France Telecom gets Orange boost Strong growth in subscriptions to mobile phone network Orange has helped boost profits at owner France Telecom. Orange added more than five million new customers in 2004, leading to a 10% increase in its revenues. Increased takeup of broadband telecoms services also boosted France Telecom's profits, which showed a 5.5% rise to 18.3bn euros ($23.4bn; £12.5bn). Fran…	business	france telecom orange boost strong growth subscriptions mobile phone network orange helped boost profits owner france telecom orange customers leading increase revenues increased takeup broadband telecoms services boosted france telecom profits rise euros france telecom spend euros buying minority shareholders data services provider equant france telecom largest telecoms internet service provider…	0	1	0	0	4	4	4	4	4	4	4	4	11	11	11	11	11	11	11
Brussels raps mobile call charges The European Commission has written to the mobile phone operators Vodafone and TMobile to challenge "the high rates" they charge for international roaming. In letters sent to the two companies, the Commission alleged the firms were abusing their dominant market position in the German mobile phone market. It is the second time Vodafone has come under the Commissio…	business	brussels raps mobile call charges european commission written mobile phone operators vodafone tmobile challenge rates charge international roaming letters companies commission alleged firms abusing dominant market position german mobile phone market time vodafone commission scrutiny uk operator appealing allegations uk roaming rates unfair excessive vodafone response commission letter defiant roa…	1	1	0	0	3	0	7	7	7	7	7	7	7	7	7	7	8	18	8
WorldCom director admits lying The former chief financial officer at US telecoms firm WorldCom has admitted before a New York court that he used to lie to fellow board members. Speaking at the trial of his former boss Bernard Ebbers, Scott Sullivan said he lied to the board to cover up the hole in WorldCom's finances. Mr Ebbers is on trial for fraud and conspiracy in relation to WorldCom's collap…	business	worldcom director admits lying chief financial officer telecoms firm worldcom admitted york court lie fellow board speaking trial boss bernard ebbers scott sullivan lied board cover hole worldcom finances ebbers trial fraud conspiracy relation worldcom collapse pleads guilty firm overstating accounts sullivan pleaded guilty fraud sentenced ebbers trial appearing prosecution witness ebbers insiste…	0	0	0	0	0	0	0	0	0	0	0	0	0	9	9	11	0	18	18
Glaxo aims high after profit fall GlaxoSmithKline saw its profits fall 9% last year to £6.2bn ($11.5bn), but Europe's biggest drugmaker says a recovery during 2005 is on the way. Cheap copies of its drugs, particularly antidepressants Paxil and Wellbutrin, and a weak dollar had hit profits, but global sales were up 1% in 2004. The firm is confident its new drug pipeline will deliver profits despi…	business	glaxo aims profit fall glaxosmithkline profits fall europe biggest drugmaker recovery cheap copies drugs antidepressants paxil wellbutrin weak dollar hit profits global sales firm confident drug pipeline deliver profits failure obesity drug chief executive jeanpierre garnier difficult afternoon trade london company share price pence garnier company absorbed lost sales generics managing grow busin…	0	1	0	0	4	4	4	4	4	4	4	4	11	11	11	11	11	11	11
Japan bank shares up on link talk Shares of Sumitomo Mitsui Financial (SMFG), and Daiwa Securities jumped amid speculation that two of Japan's biggest financial companies will merge. Financial newspaper Nihon Keizai Shimbun claimed that the firms will join up next year and already have held discussions with Japanese regulators. The firms denied that they are about to link up, but said they are ex…	business	japan bank shares link talk shares sumitomo mitsui financial smfg daiwa securities jumped amid speculation japan biggest financial companies merge financial newspaper nihon keizai shimbun claimed firms join held discussions japanese regulators firms denied link examining closely smfg shares climbed daiwa yen combining smfg japan thirdbiggest lender daiwa country secondlargest brokerage firm creat…	0	1	0	0	4	4	4	0	0	0	0	0	0	11	11	4	11	4	4
Car giant hit by Mercedes slump A slump in profitability at luxury car maker Mercedes has prompted a big drop in profits at parent DaimlerChrysler. The GermanUS carmaker saw fourth quarter operating profits fall to 785m euros ($1bn) from 2.4bn euros in 2003. MercedesBenz's woes its profits slid to just 20m euros obscured a strong performance from the Chrysler group whose returns met market expect…	business	car giant hit mercedes slump slump profitability luxury car maker mercedes prompted drop profits parent daimlerchrysler germanus carmaker fourth quarter operating profits fall euros euros mercedesbenz woes profits slid euros obscured strong performance chrysler returns met market expectations mercedes fierce competition luxury car sector bmw hopes revive fortunes mercedes profits period compared …	0	1	0	0	4	4	4	4	4	4	4	4	11	11	11	11	11	11	11
Ericsson sees earnings improve Telecoms equipment supplier Ericsson has posted a rise in fourth quarter profits thanks to clients like Deutsche Telekom upgrade their networks. Operating profit in the three months to 31 December was 9.5bn kronor (£722m; $1.3bn) against 6.3bn kronor last year. Shares tumbled, however, as the company reported a profit margin of 45.6%, less than the 47.3% forecast by…	business	ericsson earnings improve telecoms equipment supplier ericsson posted rise fourth quarter profits clients deutsche telekom upgrade networks operating profit months december kronor kronor shares tumbled company reported profit margin forecast analysts quarter ericsson shares dropped kronor trading thursday company remained optimistic earnings outlook sales fourth quarter rose kronor longterm growt…	0	1	0	0	4	4	4	4	4	4	4	4	11	11	11	11	11	11	11
Bank opts to leave rates on hold The Bank of England has left interest rates on hold at 4.75% for a sixth month in a row. The Bank's Monetary Policy Committee (MPC) decided to take no action amid mixed signals from the economy. But some economists predict a further rise in the cost of borrowing will come later this year. Interest rates rose five times between November 2003 and August 2004 as soar…	business	bank opts leave rates hold bank england left rates hold sixth month row bank monetary policy committee mpc decided action amid mixed signals economy economists predict rise cost borrowing rates rose times november august soaring house prices buoyant consumer data sparked inflation fears bank england governor mervyn king warned placing weight month economic data suggesting mpc waiting clearer pict…	0	1	0	4	4	4	4	4	4	4	4	4	4	4	4	4	11	4	4
Nigeria to boost cocoa production The government of Nigeria is hoping to triple cocoa production over the next three years with the launch of an ambitious development programme. Agriculture Minister Adamu Bello said the scheme aimed to boost production from an expected 180,000 tonnes this year to 600,000 tonnes by 2008. The government will pump 154m naira ($1.1m; £591,000) into subsidies for farm…	business	nigeria boost cocoa production government nigeria hoping triple cocoa production launch ambitious development programme agriculture minister adamu bello scheme aimed boost production expected tonnes tonnes government pump naira subsidies farming chemicals seedlings nigeria fourthlargest cocoa producer cocoa main export product nigeria coming oil government pay attention cocoa sector production fa…	0	1	0	0	0	1	0	1	1	1	1	1	0	1	1	1	0	0	1
US interest rates increased to 2% US interest rates are to rise for the fourth time in five months, in a widely anticipated move. The Federal Reserve has raised its key federal funds rate by a quarter percentage point to 2% in light of mounting evidence that the US economy is regaining steam. US companies created twice as many jobs as expected in October while exports hit record levels in Septemb…	business	rates increased rates rise fourth time months anticipated move federal reserve raised key federal funds rate quarter percentage light mounting evidence economy regaining steam companies created jobs expected october exports hit record levels september analysts clearcut victory president bush week election paved rise rise store december economists warned fed market committee sets rate policy voted…	0	1	0	0	4	4	4	4	4	4	4	4	4	4	4	4	11	4	4
US bank in $515m SEC settlement Five Bank of America subsidiaries have agreed to pay a total of $515m (£277m) to settle an investigation into fraudulent trading share practices. The US Securities and Exchange Commission announced the settlements, the latest in an industrywide cleanup of US mutual funds. The SEC also said it had brought fraud charges against two exsenior executives of Columbia Dis…	business	bank settlement bank america subsidiaries agreed pay total settle investigation fraudulent trading share practices securities exchange commission announced settlements industrywide cleanup mutual funds brought fraud charges exsenior executives columbia distributor columbia distributor fleetboston bought boa excolumbia executives agreed settlements set task stamping mutual funds markettiming form …	0	1	0	0	0	0	0	0	0	0	0	0	0	0	0	11	0	18	18
Train strike grips Buenos Aires A strike on the Buenos Aires underground has caused traffic chaos and large queues at bus stops in the Argentine capital. Tube workers walked out last week demanding a 53% pay rise and in protest against the installation of automatic ticket machines. Metrovias, the private firm which runs the five tube lines in the city, has offered an 8% increase in wages. The fir…	business	train strike grips buenos aires strike buenos aires underground caused traffic chaos queues bus stops argentine capital tube workers walked week demanding pay rise protest installation automatic ticket machines metrovias private firm runs tube lines city offered increase wages firm promised jobs lost result ticket machines commitment paper underground staff warned continue protests management acc…	1	1	0	3	3	1	1	8	8	8	0	8	8	8	8	8	8	8	8
Bargain calls widen Softbank loss Japanese communications firm Softbank has widened losses after heavy spending on a new cutrate phone service. The service, launched in December and dubbed "Otoku" or "bargain", has had almost 900,000 orders, Softbank said. The firm, a market leader in highspeed internet, had an operating loss for the three months to December of 7.5bn yen ($71.5m; £38.4m). But wit…	business	bargain calls widen softbank loss japanese communications firm softbank widened losses heavy spending cutrate phone service service launched december dubbed otoku bargain softbank firm market leader highspeed internet operating loss months december yen otoku marketing spend profit expects move black firm figure extent profits expected born tech boom investing fastrising star till tech bubble hit …	0	1	0	0	4	4	4	4	4	7	4	4	11	11	11	11	13	13	13
WMC profits up amid bid criticism Australian mining firm WMC Resources has seen a fivefold rise in profits while continuing to be the target of a hostile takeover bid. WMC said it made net profits of 1.33bn Australian dollars ($1bn; £550m) in 2004, up from A$246bn the year before. It is currently arguing against an offer from Swiss Xstrata, which the firm raised to A$8.4bn last week after WMC sai…	business	wmc profits amid bid criticism australian mining firm wmc resources fivefold rise profits continuing target hostile takeover bid wmc net profits australian dollars arguing offer swiss xstrata firm raised week wmc undervaluation reports australian government deal trade minister mark vaile bid national vaile quoted australian financial review compared xstrata attempt wmc bid oil giant shell austral…	0	1	0	0	4	4	4	0	0	0	0	0	11	11	11	11	0	11	11
Barclays profits hit record level Barclays, the UK's thirdbiggest bank, has seen annual pretax profits climb to record levels boosted by a sharp rise in business at its investment arm. Profits for the year to 31 December rose 20% to £4.6bn ($8.6bn). Barclays' chief John Varley said the bank had "caught the winds" of a very strong world economy. Earnings at Barclays Capital investment bank rose 25…	business	barclays profits hit record level barclays uk thirdbiggest bank annual pretax profits climb record levels boosted sharp rise business investment arm profits december rose barclays chief john varley bank caught winds strong economy earnings barclays capital investment bank rose investment branch operations held growth uk retail business britain banks report analysts forecasts hsbc biggest uk bank …	0	1	0	0	4	4	4	4	4	4	4	4	4	4	11	4	11	4	4
Yukos owner sues Russia for $28bn The majority owner of embattled Russian oil firm Yukos has sued the Russian government for $28.3bn (£15.2bn). The Kremlin last year seized and sold Yukos' main production arm, Yugansk, to staterun oil group Rosneft for $9.3bn to offset a massive back tax bill. Group Menatep, the Gibraltarbased holding company which controls 51% of Yukos, says this was illegal. Me…	business	yukos owner sues russia majority owner embattled russian oil firm yukos sued russian government kremlin seized sold yukos main production arm yugansk staterun oil rosneft offset massive tax bill menatep gibraltarbased holding company controls yukos illegal menatep rosneft repay loan yugansk secured assets russian government argument selling yuganskneftegaz unit yukos owed taxes onwards accused fi…	0	1	0	0	0	0	0	0	0	0	0	0	0	0	0	0	0	0	0
Qantas sees profits fly to record Australian airline Qantas has posted a record fiscal firsthalf profit thanks to costcutting measures. Net profit in the six months ending 31 December rose 28% to A$458.4m ($357.6m; £191m) from a year earlier. Analysts expected a figure closer to A$431m. Qantas shares fell almost 3%, however, after it warned that earnings growth would slow in the second half. Sale…	business	qantas profits fly record australian airline qantas posted record fiscal firsthalf profit costcutting measures net profit months december rose earlier analysts expected figure closer qantas shares fell warned earnings growth slow half sales dip indian ocean tsunami devastated holiday destinations qantas tsunami travel patterns bit surprised chief executive geoff dixon explained japanese travel au…	0	1	0	0	4	4	4	4	4	4	4	4	11	11	11	11	11	11	11
Iraq to invite phone licence bids Iraq is to invite bids for two telephone licences, saying it wants to significantly boost nationwide coverage over the next decade. Bids have been invited from local, Arab and foreign companies, Iraq's Ministry of Communications said. The winner will work in partnership with the Iraqi Telecommunications and Post Company (ITPC). The firms will install and operate …	business	iraq invite phone licence bids iraq invite bids telephone licences boost nationwide coverage decade bids invited local arab foreign companies iraq ministry communications winner partnership iraqi telecommunications post company itpc firms install operate fixed phone network providing voice fax internet services ministry increase iraq low telephone service penetration rate hopes develop highly vis…	1	1	0	1	0	4	4	4	4	7	0	4	13	13	13	13	13	13	13
Aviation firms eye booming India India's defence minister has opened the country's Aero India 2005 air show with an invitation for global aerospace firms to outsource jobs to the nation. Pranab Mukherjee said such companies could take advantage of India's highly skilled workers and low wages. More than 240 civil and military aerospace firms from 31 countries are attending the show. Analysts said …	business	aviation firms eye booming india india defence minister country aero india air invitation global aerospace firms outsource jobs nation pranab mukherjee companies advantage india highly skilled workers low wages civil military aerospace firms countries attending analysts india spend aviation market giants boeing airbus civil aviation front lockheed martin france snecma military firms attending tre…	0	1	0	0	0	4	6	8	4	0	8	8	8	11	8	8	8	8	11
Russian oil merger excludes Yukos The merger of Russian gas giant Gazprom and oil firm Rosneft is to go ahead, but will not include Yugansk, which was controversially bought last year. The merger, backed by Russian authorities, will allow foreigners to trade in Gazprom shares. Gazprom chief Alexei Miller confirmed Rosneftowned Yugansk was not part of the deal and will instead be spun off. Under t…	business	russian oil merger excludes yukos merger russian gas giant gazprom oil firm rosneft ahead yugansk controversially bought merger russian authorities foreigners trade gazprom shares gazprom chief alexei miller confirmed rosneftowned yugansk deal spun agreement controlling share gazprom exchange rosneft control gazprom allowing foreigners trade speaking ntv television controlled gazprom miller yugan…	0	0	0	0	0	0	0	0	0	0	0	0	0	0	0	0	0	0	0
Brazil buy boosts Belgium's Inbev Belgian brewing giant Inbev has seen its profits soar thanks to its acquisition of Brazil's biggest beer firm Ambev last year. Inbev, which makes Stella Artois, said pretax profits for 2004 rose 56% to 1.16bn euros ($1.5bn; £800m), and said it expected solid growth in 2005. The performance comes on sales up 21% at 8.6bn euros. The firm, formerly Interbrew, became…	business	brazil buy boosts belgium inbev belgian brewing giant inbev profits soar acquisition brazil biggest beer firm ambev inbev stella artois pretax profits rose euros expected solid growth performance sales euros firm interbrew biggest brewer volume bought ambev august acquisition meant sales volume grew months ambev sales accounting increase beermaker anheuserbusch sells beer volume inbev bigger term…	0	1	0	0	4	4	4	4	4	4	4	4	11	11	11	11	11	11	11
Salary scandal in Cameroon Cameroon says widespread corruption in its finance ministry has cost it 1bn CFA francs ($2m; £1m) a month. About 500 officials are accused of either awarding themselves extra money or claiming salaries for "nonexistent" workers. Prime Minister Ephraim Inoni, who vowed to tackle corruption when he came to office last year, said those found guilty would face tough punishm…	business	salary scandal cameroon cameroon widespread corruption finance ministry cost cfa francs month officials accused awarding extra money claiming salaries nonexistent workers prime minister ephraim inoni vowed tackle corruption office guilty tough punishments scam believed begun prime minister office alleged fraud uncovered investigation payroll ministry staff lied rank delayed retirement boost earni…	0	1	1	1	1	1	1	8	8	8	8	8	0	0	1	1	1	1	1
US adds more jobs than expected The US economy added 337,000 jobs in October a sevenmonth high and far more than Wall Street expectations. In a welcome economic boost for newly reelected President George W Bush, the Labor Department figures come after a slow summer of weak jobs gains. Jobs were created in every sector of the US economy except manufacturing. While the separate unemployment rate we…	business	adds jobs expected economy jobs october sevenmonth wall street expectations economic boost newly reelected president george bush labor department figures slow summer weak jobs gains jobs created sector economy manufacturing separate unemployment rate september people actively seeking jobs payrolls october figure wall street economists forecast addition labor department revised jobs created previo…	0	1	0	0	4	4	4	4	4	4	4	4	4	4	4	4	11	4	4
Feta cheese battle reaches court A row over whether only Greece should be allowed to label its cheese feta has reached the European Court of Justice. The Danish and German governments are challenging a European Commission ruling which said Greece should have sole rights to use the name. The Commission's decision gave the same legal protection to feta as to Italian Parma ham and French Champagne. …	business	feta cheese battle reaches court row greece allowed label cheese feta reached european court justice danish german governments challenging european commission ruling greece sole rights commission decision legal protection feta italian parma ham french champagne critics judgement feta generic term cheese produced greece commission controversial ruling protected designation origin status feta chees…	0	1	0	0	0	0	0	0	0	0	0	0	0	0	15	0	15	0	5
Ukraine revisits state selloffs Ukraine is preparing what could be a wholesale review of the privatisation of thousands of businesses by the previous administration. The new President, Viktor Yushchenko, has said a "limited" list of companies is being drawn up. But on Wednesday Prime Minister Yulia Tymoshenko said the government was planning to renationalise 3,000 firms. The government says many …	business	ukraine revisits selloffs ukraine preparing wholesale review privatisation thousands businesses previous administration president viktor yushchenko limited list companies drawn wednesday prime minister yulia tymoshenko government planning renationalise firms government privatised firms sold allies administration rockbottom prices businesses massive corporations tiny shopfronts sold command econom…	0	1	0	0	0	0	0	0	0	0	0	0	0	0	0	0	0	0	0
Bank set to leave rates on hold UK interest rates are set to remain on hold at 4.75% following the latest meeting of the Bank of England. The Bank's ratesetting committee has put up rates five times in the past year but rates have been on hold since September amid signs of a slowdown. Economic growth slowed in the previous quarter, as manufacturing output fell, while consumer confidence has slipp…	business	bank set leave rates hold uk rates set remain hold meeting bank england bank ratesetting committee rates times rates hold september amid signs slowdown economic growth slowed previous quarter manufacturing output fell consumer confidence slipped growing evidence booming uk housing market cooling house prices fell october nationwide biggest monthly fall february month bank england governor mervyn …	0	1	0	4	4	4	4	4	4	4	4	4	4	4	4	4	11	4	4
Winter freeze keeps oil above $50 Oil prices carried on rising on Wednesday after cold weather on both sides of the North Atlantic pushed US crude prices to fourmonth highs. Freezing temperatures and heavy snowfalls took crude oil prices past $50 a barrel on Tuesday for the first time since November. Declines in the dollar have also contributed to the rising oil price. US crude was trading at $51…	business	winter freeze oil oil prices carried rising wednesday cold weather north atlantic pushed crude prices fourmonth highs freezing temperatures heavy snowfalls crude oil prices barrel tuesday time november declines dollar contributed rising oil price crude trading gmt asian electronic trade wednesday barrel crude oil closed york tuesday opec tuesday prices cartel reason cut output peak barrel reached…	0	1	0	0	4	4	4	4	4	4	4	4	4	4	4	4	4	4	4
German jobless rate at new record More than 5.2 million Germans were out of work in February, new figures show. The figure of 5.216 million people, or 12.6% of the workingage population, is the highest jobless rate in Europe's biggest economy since the 1930s. The news comes as the head of Germany's panel of government economic advisers predicted growth would again stagnate. Speaking on German TV,…	business	german jobless rate record germans february figures figure people workingage population jobless rate europe biggest economy news head germany panel government economic advisers predicted growth stagnate speaking german tv bert ruerup panel earlier forecast optimistic warned growth german government tackle stubbornlyhigh levels joblessness range labour market reforms centre hartziv programme intro…	0	1	0	1	4	4	4	4	4	4	4	4	4	4	4	4	11	4	4
Ore costs hit global steel firms Shares in steel firms have dropped worldwide amid concerns that higher iron ore costs will hit profit growth. Shares in Germany's ThyssenKrupp, the UK's Corus and France's Arcleor fell while Japan's Nippon Steel slid after it agreed to pay 72% more for iron ore. China's Baoshan Iron and Steel Co. said it was delaying a share sale because of weak market conditions,…	business	ore costs hit global steel firms shares steel firms dropped worldwide amid concerns iron ore costs hit profit growth shares germany thyssenkrupp uk corus france arcleor fell japan nippon steel slid agreed pay iron china baoshan iron steel delaying share sale weak market conditions adding raise steel prices offset ore costs threat raw material costs hit industries carmakers france peugeot warned p…	0	1	0	0	4	4	4	4	4	4	4	4	4	4	11	4	11	4	4
BMW reveals new models pipeline BMW is preparing to enter the market for carstyle people carriers, the firm's chief has told BBC News. Speaking at a BMW event ahead of the Geneva motor show, Helmut Panke predicted demand for such crossover vehicles would soar in Europe. In contrast, he said, the popularity of vanstyle sevenseat vehicles and traditional saloon cars would fade. "Customers are movin…	business	bmw reveals models pipeline bmw preparing enter market carstyle people carriers firm chief told bbc news speaking bmw event ahead geneva motor helmut panke predicted demand crossover vehicles soar europe contrast popularity vanstyle sevenseat vehicles traditional saloon cars fade customers moving minivan traditional concepts attractive decided bmw enter crossover segment clearest indication car m…	0	0	0	4	4	4	4	4	4	4	4	4	4	4	4	4	4	4	4
Asian banks halt dollar's slide The dollar regained some lost ground against most major currencies on Wednesday after South Korea and Japan denied they were planning a selloff. The dollar suffered its biggest oneday fall in four months on Tuesday on fears that Asian central banks were about to lower their reserves of dollars. Japan is the biggest holder of dollar reserves in the world, with South…	business	asian banks halt dollar slide dollar regained lost ground major currencies wednesday south korea japan denied planning selloff dollar suffered biggest oneday fall months tuesday fears asian central banks lower reserves dollars japan biggest holder dollar reserves south korea fourth largest dollar buying yen gmt stronger day edged euro pound euro worth pound buying concerns rising oil prices outlo…	0	1	0	0	4	4	4	4	4	4	4	4	4	4	4	4	11	4	4
Weak dollar trims Cadbury profits The world's biggest confectionery firm, Cadbury Schweppes, has reported a modest rise in profits after the weak dollar took a bite out of its results. Underlying pretax profits rose 1% to £933m ($1.78bn) in 2004, but would have been 8% higher if currency movements were stripped out. The owner of brands such as Dairy Milk, Dr Pepper and Snapple generates more than…	business	weak dollar trims cadbury profits biggest confectionery firm cadbury schweppes reported modest rise profits weak dollar bite underlying pretax profits rose currency movements stripped owner brands dairy milk dr pepper snapple generates sales uk cadbury confident hit targets external commercial environment remains competitive confident strategy brands people deliver goal ranges chief executive tod…	0	1	0	0	4	4	4	4	4	4	4	4	4	4	11	4	11	11	11
Oil prices fall back from highs Oil prices retreated from fourmonth highs in early trading on Tuesday after producers' cartel Opec said it was now unlikely to cut production. Following the comments by acting Opec secretary general Adnan ShihabEldin, US light crude fell 32 cents to $51.43 a barrel. He said that high oil prices meant Opec was unlikely to stick to its plan to cut output in the secon…	business	oil prices fall highs oil prices retreated fourmonth highs trading tuesday producers cartel opec cut production comments acting opec secretary adnan shihabeldin light crude fell cents barrel oil prices meant opec stick plan cut output quarter london brent crude fell cents barrel opec meeting production levels march monday oil prices rose sixth straight session reaching fourmonth cold weather thre…	0	1	0	0	4	4	4	4	4	4	4	4	4	4	4	4	4	4	4
WinnDixie files for bankruptcy US supermarket group WinnDixie has filed for bankruptcy protection after succumbing to stiff competition in a market dominated by WalMart. WinnDixie, once among the most profitable of US grocers, said Chapter 11 protection would enable it to successfully restructure. It said its 920 stores would remain open, but analysts said it would most likely offload a number of…	business	winndixie files bankruptcy supermarket winndixie filed bankruptcy protection succumbing stiff competition market dominated walmart winndixie profitable grocers chapter protection enable restructure stores remain analysts offload sites jacksonville floridabased firm total debts bankruptcy petition listed biggest creditor foods giant kraft foods owes analysts winndixie consumers demands burdened st…	0	1	0	0	0	4	4	4	4	4	4	4	4	4	11	4	0	11	4
Why few targets are better than many The economic targets set out at the Lisbon summit of European Union leaders in 2000 were meant to help Europe leapfrog its way past the United States to become the world's leading economy by 2010. But the Lisbon targets are about much more than just economic prestige. For many economists and analysts they are about ensuring Europe doesn't become a global econo…	business	targets economic targets set lisbon summit european union leaders meant europe leapfrog united leading economy lisbon targets economic prestige economists analysts ensuring europe global economic laggard ensuring europe continue compete equal growing economic giants asia india china economic united tone urgency report wednesday dutch prime minister wim kok kok commissioned european commission mar…	0	1	0	1	1	1	1	4	4	4	4	8	8	8	4	1	1	1	4
Malaysia lifts Islamic bank limit Malaysia's central bank is to relax restrictions on foreign ownership to encourage Islamic banking. Banks in Malaysia will now be able to sell up to 49% of their Islamic banking units, while the limit on other kinds of bank remains at 30%. RHB, Malaysia's thirdbiggest lender, is already scouting for a foreign partner for its new Islamic banking unit, the firm tol…	business	malaysia lifts islamic bank limit malaysia central bank relax restrictions foreign ownership encourage islamic banking banks malaysia sell islamic banking units limit kinds bank remains rhb malaysia thirdbiggest lender scouting foreign partner islamic banking unit firm told reuters moves malaysia ahead deadline sector country deal join trade organisation set deadline liberalisation islamic bankin…	0	1	0	0	4	4	4	4	4	4	4	8	8	4	8	8	11	4	8
Alfa Romeos 'to get GM engines' Fiat is to stop making sixcylinder petrol engines for its sporty Alfa Romeo subsidiary, unions at the Italian carmaker have said. The unions claim Fiat is to close the Fiat Powertrain plant at Arese near Milan and instead source sixcylinder engines from General Motors. Fiat has yet to comment on the matter, but the unions say the new engines will be made by GM in A…	business	alfa romeos gm engines fiat sixcylinder petrol engines sporty alfa romeo subsidiary unions italian carmaker unions claim fiat close fiat powertrain plant arese milan source sixcylinder engines motors fiat comment matter unions engines gm australia news week gm pulled agreement buy fiat gm pay partner fiat euros deal forced buy italian carmaker outright fiat gm fiveyear alliance joint ventures eng…	0	0	0	0	0	0	0	0	0	0	0	0	0	0	0	0	0	0	0
Saab to build Cadillacs in Sweden General Motors, the world's largest car maker, has confirmed that it will build a new mediumsized Cadillac BLS at its lossmaking Saab factory in Sweden. The car, unveiled at the Geneva motor show, is intended to compete in the mediumsized luxury car market. It will not be sold in the US, said GM Europe president CarlPeter Forster. As part of its efforts to make t…	business	saab build cadillacs sweden motors largest car maker confirmed build mediumsized cadillac bls lossmaking saab factory sweden car unveiled geneva motor intended compete mediumsized luxury car market sold gm europe president carlpeter forster efforts marque appeal european drivers car cadillac diesel engine gm announcement allay fears saab factory closure factory trollhaettan centre rumours gm plan…	0	1	0	0	4	4	4	4	4	4	4	4	8	8	8	8	8	8	8
Shares hit by MS drug suspension Shares in Elan and Biogen Idec plunged on Monday as the firms suspended sales of new multiple sclerosis drug Tysabri after a patient's death in the US. On the New York Stock Exchange, shares in Irelandbased Elan lost 70% while US partner Biogen Idec shed 43%. The firms took action after the death from a central nervous system disease and a suspected case of the co…	business	shares hit ms drug suspension shares elan biogen idec plunged monday firms suspended sales multiple sclerosis drug tysabri patient death york stock exchange shares irelandbased elan lost partner biogen idec firms action death central nervous system disease suspected condition cited involved tysabri avonex biogen idec existing multiple sclerosis drug companies reports rare condition progressive mu…	0	1	0	0	4	4	0	0	8	0	0	0	11	11	11	11	0	11	11
Bank voted 81 for no rate change The decision to keep interest rates on hold at 4.75% earlier this month was passed 81 by the Bank of England's ratesetting body, minutes have shown. One member of the Bank's Monetary Policy Committee (MPC) Paul Tucker voted to raise rates to 5%. The news surprised some analysts who had expected the latest minutes to show another unanimous decision. Worries over gr…	business	bank voted rate change decision rates hold earlier month passed bank england ratesetting body minutes bank monetary policy committee mpc paul tucker voted raise rates news surprised analysts expected minutes unanimous decision worries growth rates consumer spending decision freeze rates minutes bank inflation report released week main reason inflation fall weaker consumer spending mpc paul tucker…	0	1	0	4	4	4	4	4	4	4	4	4	4	4	4	4	11	4	4
Crude oil prices back above $50 Cold weather across parts of the United States and much of Europe has pushed US crude oil prices above $50 a barrel for the first time in almost three months. Freezing temperatures and heavy snowfall have increased demand for heating fuel in the US, where stocks are low. Fresh falls in the value of the dollar helped carry prices above the $50 mark for the first tim…	business	crude oil prices cold weather united europe pushed crude oil prices barrel time months freezing temperatures heavy snowfall increased demand heating fuel stocks low fresh falls dollar helped carry prices mark time november barrel crude oil closed york tuesday opec tuesday reason cut output peak barrel reached october prices average brent crude rose london trading adding close western europe north…	0	1	0	0	4	4	4	4	4	4	4	4	4	4	4	4	4	4	4
House prices show slight increase Prices of homes in the UK rose a seasonally adjusted 0.5% in February, says the Nationwide building society. The figure means the annual rate of increase in the UK is down to 10.2%, the lowest rate since June 2001. The annual rate has halved since August last year, as interest rises have cooled the housing market. At the same time, the number of mortgage approval…	business	house prices slight increase prices homes uk rose seasonally adjusted february nationwide building society figure annual rate increase uk lowest rate june annual rate halved august rises cooled housing market time mortgage approvals fell january low official bank england figures nationwide january house prices month earlier market collapsing feared nationwide economist alex bannister warnings uk …	0	1	0	0	4	4	4	4	4	4	4	4	4	4	4	4	11	4	4
Golden rule boost for Chancellor Chancellor Gordon Brown has been given a £2.1bn boost in his attempts to meet his golden economic rule, which allows him to borrow only for investment. The extra leeway came after the Office for National Statistics said it had been measuring road expenditure data wrongly over the past five years. It comes just weeks ahead of the Budget and an expected general elec…	business	golden rule boost chancellor chancellor gordon brown boost attempts meet golden economic rule borrow investment extra leeway office national statistics measuring road expenditure data wrongly weeks ahead budget expected election shadow chancellor oliver letwin timing convenient government review ons mistake double counting spending roads correcting error reducing current expenditure increasing ne…	1	1	1	1	1	1	1	1	1	1	1	1	1	1	1	1	1	1	1
Macy's owner buys rival for $11bn US retail giant Federated Department Stores is to buy rival May Department Stores for $11bn (£5.7bn). The deal will bring together famous stores like Macy's, Bloomingdale's and Marshall Field's, creating the largest department store chain in the US. The combined firm will operate about 1,000 stores across the US, with combined annual sales of $30bn. The two compa…	business	macy owner buys rival retail giant federated department stores buy rival department stores deal bring famous stores macy bloomingdale marshall field creating largest department store chain combined firm operate stores combined annual sales companies facing competition likes walmart merge ago talks failed sources familiar deal negotiations companies sped chairman chief executive gene kahn resigned…	0	1	0	0	4	4	4	0	0	0	0	11	11	11	11	11	11	11	11
Industrial revival hope for Japan Japanese industry is growing faster than expected, boosting hopes that the country's retreat back into recession is over. Industrial output rose 2.1% adjusted for the time of year in January from a month earlier. At the same time, retail sales picked up faster than at any time since 1997. The news sent Tokyo shares to an eightmonth high, as investors hoped for a …	business	industrial revival hope japan japanese industry growing faster expected boosting hopes country retreat recession industrial output rose adjusted time january month earlier time retail sales picked faster time news tokyo shares eightmonth investors hoped recovery quarters contraction april nikkei day yen strengthening dollar yen weaker exports engine japan economy weak domestic demand helped trigg…	0	1	0	0	4	4	4	4	4	4	4	4	4	4	4	4	11	4	4
Khodorkovsky ally denies charges A close associate of former Yukos boss Mikhail Khodorkovsky has told a court that fraud charges levelled against him are "false". Platon Lebedev has been on trial alongside Mr Khodorkovsky since June in a case centring around the privatisation of a fertiliser firm. The pair claim they are being punished by the authorities for the political ambitions of Mr Khodorko…	business	khodorkovsky ally denies charges close associate yukos boss mikhail khodorkovsky told court fraud charges levelled false platon lebedev trial alongside khodorkovsky june centring privatisation fertiliser firm pair claim punished authorities political ambitions khodorkovsky lebedev absurd contradictions defence legal basis charges faced allegations tax evasion embarrassment understand file complai…	0	0	0	0	0	0	0	0	0	0	0	0	0	0	0	0	0	0	0
Qatar and Shell in $6bn gas deal Shell has signed a $6bn (£3.12bn) deal with the Middle Eastern sheikhdom of Qatar to supply liquid natural gas (LNG) to North America and Europe. The UKDutch group will own 30% of the project, with Qatar's state oil firm owning the rest. The agreement is the latest in a string of deals reached by Qatar, which is trying to make itself a regional leader in natural g…	business	qatar shell gas deal shell signed deal middle eastern sheikhdom qatar supply liquid natural gas lng north america europe ukdutch project qatar oil firm owning rest agreement string deals reached qatar regional leader natural gas oil giant exxonmobil signed deal earlier sunday france total expected join exxonmobil scheme dubbed monday tonnes lng exxonmobil tonnes deal shell agreement foresees buil…	0	1	0	0	0	4	0	0	0	0	0	0	0	0	0	0	0	0	0
India unveils antipoverty budget India is to boost spending on primary schools and health in a budget flagged as a boost for the ordinary citizen. India's defence budget has also been raised 7.8% to 830bn rupees ($19bn). The priority for Finance Minister Palaniappan Chidambaram is to fight poverty and keep the government's Communist allies onside. But his options are limited by a new law which ma…	business	india unveils antipoverty budget india boost spending primary schools health budget flagged boost ordinary citizen india defence budget raised rupees priority finance minister palaniappan chidambaram fight poverty government communist allies onside options limited law cut budget deficit gdp march country deficit spending india territories included fiscal responsibility law chidambaram trim defici…	0	1	0	1	4	4	4	4	4	4	4	1	1	4	1	1	1	4	4
GM pays $2bn to evade Fiat buyout General Motors of the US is to pay Fiat 1.55bn euros ($2bn; £1.1bn) to get out of a deal which could have forced it to buy the Italian car maker outright. Fiat had sold GM a stake in 2000, as part of a partnership agreement. But Fiat's heavy losses have convinced GM whose own European operations are in the red to back away. The payoff means the two firms will unw…	business	gm pays evade fiat buyout motors pay fiat euros deal forced buy italian car maker outright fiat sold gm stake partnership agreement fiat heavy losses convinced gm european operations red payoff firms unwind joint ventures fiat supplying diesel engines money reduce debt fiat shares milan stock exchange rose gmt euros shot trading absolute freedom design future fiat chief executive sergio marchionn…	0	0	0	0	4	0	0	0	0	0	0	0	0	0	0	0	0	0	0
ExBoeing director gets jail term An exchief financial officer at Boeing has received a fourmonth jail sentence and a fine of $250,000 (£131,961) for illegally hiring a top Air Force aide. Michael Sears admitted his guilt in breaking conflict of interest laws by recruiting Darleen Druyun while she still handled military contracts. Ms Druyun is currently serving a nine month sentence for favouring …	business	exboeing director jail term exchief financial officer boeing received fourmonth jail sentence fine illegally hiring top air force aide michael sears admitted guilt breaking conflict laws recruiting darleen druyun handled military contracts ms druyun serving month sentence favouring boeing awarding lucrative contracts boeing lost government contract pentagon inquiry contract provide refuelling tan…	0	1	0	0	0	0	0	8	8	8	8	8	8	7	8	8	7	18	18
Verizon 'seals takeover of MCI' Verizon has won a takeover battle for US phone firm MCI with a bid worth $6.8bn (£3.6bn), reports say. The two firms are expected to seal the deal on Monday morning, according to news agency reports, despite what was thought to be a higher bid from Qwest. The US telecoms market is consolidating fast, with former longdistance giant ATT being bought by former subsidi…	business	verizon takeover mci verizon won takeover battle phone firm mci bid worth reports firms expected seal deal monday morning news agency reports bid qwest telecoms market consolidating fast longdistance giant att bought subsidiary sbc earlier mci exited bankruptcy april bust previous worldcom bankruptcy admission illegally booked expenses inflated profits shareholders lost company collapsed workers …	0	0	0	0	4	0	4	4	0	0	11	11	11	11	11	11	11	11	11
US data sparks inflation worries Wholesale prices in the US rose at the fastest rate in more than six years in January, according to government data. New figures show the Labor Department producer price index (PPI) rose by 0.3% in line with forecasts. But core producer prices, which exclude food and energy costs, surged by 0.8%, the biggest rise since December 1998, increasing inflationary concer…	business	data sparks inflation worries wholesale prices rose fastest rate january government data figures labor department producer price ppi rose forecasts core producer prices exclude food energy costs surged biggest rise december increasing inflationary concerns contrast university michigan barometer retail consumer confidence slight dip university consumer spending fell february january fall retail sp…	0	1	0	0	4	4	4	4	4	4	4	4	4	4	4	4	11	4	4
Yukos sues four firms for $20bn Russian oil firm Yukos has sued four companies for their role in last year's forced state auction of its key oil production unit Yuganskneftegas. Yukos is claiming more than $20bn (£11bn) in damages after Yugansk was sold in December to settle back taxes. The four companies named in the law suit are gas giant Gazprom, its unit Gazpromneft, investment company Baikal…	business	yukos sues firms russian oil firm yukos sued companies role forced auction key oil production unit yuganskneftegas yukos claiming damages yugansk sold december settle taxes companies named law suit gas giant gazprom unit gazpromneft investment company baikal oil firm rosneft yukos submitted suit houston filed bankruptcy suing damages yukos court send tax dispute russian government international a…	0	0	0	0	0	0	0	0	0	0	0	0	0	0	0	0	0	0	0
Consumer spending lifts US growth US economic growth accelerated in the third quarter, helped by strong consumer spending, official figures have shown. The economy expanded at an annual rate of 3.7% in the July to September period, the Commerce Department said. The figure marked an increase on the 3.3% growth recorded in the second quarter, but fell short of the 4.2% rate pencilled in by forecast…	business	consumer spending lifts growth economic growth accelerated quarter helped strong consumer spending official figures economy expanded annual rate july september period commerce department figure marked increase growth recorded quarter fell short rate pencilled forecasters increase reflected biggest jump consumer spending softer consensus real surprise gary thayer economist ag edwards sons friday g…	0	1	0	0	4	4	4	4	4	4	4	4	4	4	4	4	11	4	4
Crossrail link 'to get goahead' The £10bn Crossrail transport plan, backed by business groups, is to get the goahead this month, according to The Mail on Sunday. It says the UK Treasury has allocated £7.5bn ($13.99bn) for the project and that talks with business groups on raising the rest will begin shortly. The much delayed Crossrail Link Bill would provide for a fast crossLondon rail link. The …	business	crossrail link goahead crossrail transport plan business goahead month mail sunday uk treasury allocated project talks business raising rest shortly delayed crossrail link bill provide fast crosslondon rail link paper house commons february reading follow march introduce hybrid bill crossrail spring remains department transport sunday jeremy de souza spokesman crossrail sunday confirm treasury pl…	1	1	1	1	1	1	1	8	8	8	8	12	8	12	8	1	1	1	1
Hariri killing hits Beirut shares Shares in Solidere, the Lebanese company founded by assassinated former prime minister Rafik Hariri, fell 15% in renewed trading in Beirut. The real estate firm, which dominates Lebanon's stock exchange, ended the day down at $8.08. Traders said there was some panic selling during Friday's session, the first since a threeday market closure to mourn the death of M…	business	hariri killing hits beirut shares shares solidere lebanese company founded assassinated prime minister rafik hariri fell renewed trading beirut real estate firm dominates lebanon stock exchange day traders panic selling friday session threeday market closure mourn death hariri beirut benchmark blom stock closed solidere hariri major shareholder major drag company owns property central beirut rest…	0	1	0	0	4	4	4	4	0	0	0	0	11	11	11	11	11	11	11
Small firms 'hit by rising costs' Rising fuel and materials costs are hitting confidence among the UK's small manufacturers despite a rise in output, business lobby group the CBI says. A CBI quarterly survey found output had risen by the fastest rate in seven years but many firms were seeing the benefits offset by increasing expenses. The CBI also found spending on innovation, training and retrai…	business	firms rising costs rising fuel materials costs hitting confidence uk manufacturers rise output business lobby cbi cbi quarterly survey output risen fastest rate firms benefits offset increasing expenses cbi spending innovation training retraining forecast firms continue scale investment buildings machinery cbi companies government lessen regulatory load hoping rates hold manufacturers facing uphi…	0	1	0	0	4	4	4	4	4	4	4	4	4	4	4	4	11	4	4
Buyers snap up Jet Airways' shares Investors have snapped up shares in Jet Airways, India's biggest airline, following the launch of its much anticipated initial public offer (IPO). The IPO for 17.3 million shares was fully sold within 10 minutes of opening, on Friday. Analysts expect Jet to raise at least 16.4bn rupees ($375m; £198m) from the offering. Interest in Jet's IPO has been fuelled by h…	business	buyers snap jet airways shares investors snapped shares jet airways india biggest airline launch anticipated initial public offer ipo ipo shares sold minutes friday analysts expect jet raise rupees offering jet ipo fuelled hopes robust growth india air travel market share offer representing jet equity oversubscribed news agency reuters reported jet founded londonbased travel agent naresh goyal pl…	0	1	0	0	4	4	4	4	4	4	4	4	11	11	11	11	11	11	11
House prices suffer festive fall UK house prices fell 0.7% in December, according to figures from the Office of the Deputy Prime Minister. Nationally, house prices rose at an annual rate of 10.7% in December, less than the 13.7% rise the previous month. The average UK house price fell from £180,126 in November to £178,906, reflecting recent Land Registry figures confirming a slowdown in late 2004…	business	house prices suffer festive fall uk house prices fell december figures office deputy prime minister nationally house prices rose annual rate december rise previous month average uk house price fell november reflecting land registry figures confirming slowdown late major uk regions northern ireland experienced fall annual growth december december traditionally quiet month housing market christmas …	0	1	0	0	4	4	4	4	4	4	4	4	4	4	4	4	11	4	4
Deutsche Boerse boosts dividend Deutsche Boerse, the German stock exchange that is trying to buy its London rival, has said it will boost its 2004 dividend payment by 27%. Analysts said that the move is aimed at winning over investors opposed to its bid for the London Stock Exchange. Critics of the takeover have complained that the money could be better used by returning cash to shareholders. Deu…	business	deutsche boerse boosts dividend deutsche boerse german stock exchange buy london rival boost dividend payment analysts move aimed winning investors opposed bid london stock exchange critics takeover complained money returning cash shareholders deutsche boerse profit months december euros sales climbed euros lifting revenue record euros frankfurtbased deutsche boerse offered euros london stock exc…	0	1	0	0	4	4	4	0	0	0	11	11	11	11	11	11	11	18	18
Newest EU members underpin growth The European Union's newest members will bolster Europe's economic growth in 2005, according to a new report. The eight central European states which joined the EU last year will see 4.6% growth, the United Nations Economic Commission for Europe (UNECE) said. In contrast, the 12 Euro zone countries will put in a "lacklustre" performance, generating growth of only…	business	eu underpin growth european union bolster europe economic growth report central european joined eu growth united nations economic commission europe unece contrast euro zone countries lacklustre performance generating growth global economy slow unece forecasts widespread weakness consumer demand warned growth threatened attempts reduce united huge current account deficit lead volatility exchange r…	0	1	0	0	4	4	4	4	4	4	4	4	4	4	4	4	11	4	4
Brewers' profits lose their fizz Heineken and Carlsberg, two of the world's largest brewers, have reported falling profits after beer sales in western Europe fell flat. Dutch firm Heineken saw its annual profits drop 33% and warned that earnings in 2005 may also slide. Danish brewer Carlsberg suffered a 3% fall in profits due to waning demand and increased marketing costs. Both are looking to Rus…	business	brewers profits lose fizz heineken carlsberg largest brewers reported falling profits beer sales western europe fell flat dutch firm heineken annual profits drop warned earnings slide danish brewer carlsberg suffered fall profits waning demand increased marketing costs russia china provide future growth western european markets mature heineken net income fell euros euro ago blamed weak demand wes…	0	1	0	0	4	4	4	4	4	4	4	4	4	4	11	4	11	4	4
Yangtze Electric's profits double Yangtze Electric Power, the operator of China's Three Gorges Dam, has said its profits more than doubled in 2004. The firm has benefited from increased demand for electricity at a time when power shortages have hit cities and provinces across the country. As a hydroelectricpower generator it has not been hurt by higher coal costs. Net income jumped to 3bn yuan in…	business	yangtze electric profits double yangtze electric power operator china gorges dam profits doubled firm benefited increased demand electricity time power shortages hit cities provinces country hydroelectricpower generator hurt coal costs net income jumped yuan compared yuan sales surged yuan yuan earlier figures topped analysts expectations rate growth slowed analysts forecast decline rate expansio…	0	1	0	0	4	4	4	4	4	4	4	4	4	4	3	4	3	4	3
French consumer spending rising French consumers increased their spending by 1.5% in January, a figure which bodes well for the country's economic growth, figures revealed. The National Statistic Institute (INSEE) added that consumer spending in January rose 3.8% on a yearonyear basis. Rising sales of household equipment were behind the increase. The INSEE also said that French consumer prices fe…	business	french consumer spending rising french consumers increased spending january figure bodes country economic growth figures revealed national statistic institute insee consumer spending january rose yearonyear basis rising sales household equipment increase insee french consumer prices fell january annual basis increase spending january french households bought fewer cars january insee car sales fel…	0	1	0	0	4	4	4	4	4	4	4	4	4	4	4	4	11	4	4
GSK aims to stop Aids profiteers One of the world's largest manufacturers of HIV/Aids drugs has launched an initiative to combat the smuggling of cheaper pills supplied to poorer African countries back into Europe for resale at far higher price. The company, GlaxoSmithKline, is to alter the packaging and change the colour of the pills, currently provided to developing nations under a humanitarian…	business	gsk aims aids profiteers largest manufacturers drugs launched initiative combat smuggling cheaper pills supplied poorer african countries europe resale price company glaxosmithkline alter packaging change colour pills provided developing nations humanitarian agreement estimated drugs companies losing hundreds millions dollars result diversion products sensitive drugs companies maintain profits tr…	0	1	0	0	3	0	0	0	8	0	8	8	8	8	8	8	13	8	13
Optimism remains over UK housing The UK property market remains robust despite the recent slowdown, according to mortgage lender Bradford Bingley and housebuilder George Wimpey. BB said the buytolet market in which the bank is a major player would continue to grow much faster than the wider mortgage market. The comments came as it reported a 6% rise in profits to £280.2m ($532m). Wimpey reported …	business	optimism remains uk housing uk property market remains robust slowdown mortgage lender bradford bingley housebuilder george wimpey bb buytolet market bank major player continue grow faster wider mortgage market comments reported rise profits wimpey reported rise profits reservations expected housing market surveys uk property market cooled months rapid growth week figures council mortgage lenders…	0	1	0	0	4	4	4	4	4	4	4	4	4	4	4	4	11	4	4
Russia WTO talks 'make progress' Talks on Russia's proposed membership of the World Trade Organisation (WTO) have been "making good progress" say those behind the negotiations. But the chairman of the working party, Ambassador Stefan Johannesson of Iceland, warned that there was "still a lot of work has to be done". His comments came as President George W Bush said the US backed Russian entry. Bu…	business	russia wto talks progress talks russia proposed membership trade organisation wto progress negotiations chairman party ambassador stefan johannesson iceland warned lot comments president george bush russian entry russia progress government renew commitment democracy rule law comments days meet president vladimir putin russia waiting decade join wto hopes finally decision reached december wto curr…	0	1	0	0	0	0	0	0	0	0	0	0	8	0	0	8	0	0	0
Irish duo could block Man Utd bid Irishmen JP McManus and John Magnier, who own a 29% stake in Manchester United, will reportedly reject any formal £800m offer for the club. The Sunday Times and The Sunday Telegraph say they will oppose any formal £800m takeover bid from US tycoon Malcom Glazer. Mr Glazer got permission to look at the club's accounts last week. Irish billionaires Mr McManus and M…	business	irish duo block utd bid irishmen jp mcmanus john magnier stake manchester united reportedly reject formal offer club sunday times sunday telegraph oppose formal takeover bid tycoon malcom glazer glazer permission club accounts week irish billionaires mcmanus magnier bid undervalues club prospects magnier mcmanus hold stake cubic expression investment vehicle power block bid glazer financial backe…	0	0	0	4	4	4	0	0	0	0	1	1	11	11	11	11	1	18	18
Dollar drops on reserves concerns The US dollar has dropped against major currencies on concerns that central banks may cut the amount of dollars they hold in their foreign reserves. Comments by South Korea's central bank at the end of last week have sparked the recent round of dollar declines. South Korea, which has about $200bn in foreign reserves, said it plans instead to boost holdings of cur…	business	dollar drops reserves concerns dollar dropped major currencies concerns central banks cut amount dollars hold foreign reserves comments south korea central bank week sparked round dollar declines south korea foreign reserves plans boost holdings currencies australian canadian dollar analysts reckon nations follow suit ditch dollar gmt euro day euros dollar british pound break level dollar fallen …	0	1	0	0	4	4	4	4	4	4	4	4	4	4	4	4	11	4	4
India and Russia in energy talks India and Russia are to work together in a series of energy deals, part of a pact which could see India invest up to $20bn in oil and gas projects. On the agenda are oil and gas extraction as well as transportation deals, to be led by Russian energy giant Gazprom and India's ONGC. The Indian firm is also expected to hold talks on Tuesday about buying a stake in as…	business	india russia energy talks india russia series energy deals pact india invest oil gas projects agenda oil gas extraction transportation deals led russian energy giant gazprom india ongc indian firm expected hold talks tuesday buying stake assets owned yukos reported keen buying stake oil unit yuganskneftegas yukos subsidiary controversially sold eventually acquired stateowned energy giant rosneft …	0	1	0	0	0	0	0	0	0	0	0	0	0	0	0	0	0	0	0
Weak data buffets French economy A batch of downbeat government data has cast doubt over the French economy's future prospects. Official figures showed on Friday that unemployment was unchanged at 9.9% last month, while consumer confidence fell unexpectedly in October. At the same time, finance minister Nicolas Sarkozy warned that high oil prices posed a threat to French growth. "[Oil prices] wil…	business	weak data buffets french economy batch downbeat government data cast doubt french economy future prospects official figures friday unemployment unchanged month consumer confidence fell unexpectedly october time finance minister nicolas sarkozy warned oil prices posed threat french growth oil prices weigh consumer spending short term confidence oil prices risen start production struggles pace soar…	0	1	0	0	4	4	4	4	4	4	4	4	4	4	4	4	11	4	4
Business fears over sluggish EU economy As European leaders gather in Rome on Friday to sign the new EU constitution, many companies will be focusing on matters much closer to home namely how to stay in business. Lille is a popular tourist destination for Britons who want a taste of France at the weekend. But how many tourists look at the impressively grand Victorian Chambre de Commerce, which st…	business	business fears sluggish eu economy european leaders gather rome friday sign eu constitution companies focusing matters closer stay business lille popular tourist destination britons taste france weekend tourists impressively grand victorian chambre de commerce stands opera house built town halls northern english towns wealth created coal steel textiles northern england industrial scotland industr…	0	1	0	0	4	4	4	4	4	4	4	4	8	8	8	8	8	4	4
MS cuts prices by average of 24% Marks Spencer has cut prices in London and the regions by an average of 24%, according to research from a City investment bank. Dresdner Kleinwort Wasserstein said: "In spite of the snow in the UK, it still feels very early to be cutting prices of spring merchandise." Stuart Rose, head of MS, said last year its prices were too high. "We are bringing in ranges at n…	business	ms cuts prices average marks spencer cut prices london regions average city investment bank dresdner kleinwort wasserstein spite snow uk feels cutting prices spring merchandise stuart rose head ms prices bringing ranges price compete midmarket retailers ms biggest competitors move force lower prices drkw cuts stock term step change pricing news ms margin brought lot clothing price stuart rose str…	0	1	0	0	4	4	4	4	4	4	4	4	4	11	11	4	11	4	4
US bank 'loses' customer details The Bank of America has revealed it has lost computer tapes containing account details of more than one million customers who are US federal employees. Several members of the US Senate are among those affected, who could now be vulnerable to identity theft. Senate sources say the missing tapes may have been stolen from a plane by baggage handlers. The bank gave no…	business	bank customer details bank america revealed lost computer tapes account details customers federal employees senate vulnerable identity theft senate sources missing tapes stolen plane baggage handlers bank details records disappeared misused customers accounts monitoring account holders notified unusual activity detected bank officials bank america tapes missing december shipped backup data centre…	1	1	0	0	0	0	0	8	8	8	8	8	3	3	3	8	3	18	18
Huge rush for Jet Airways shares Indian airline Jet Airways' initial public offering was oversubscribed 16.2 times, bankers said on Friday. Over 85% of the bids were at the higher end of the price range of 1,0501,125 rupees ($24$26). Jet Airways, a lowfare airline, was founded by Londonbased extravel agent Naresh Goya, and controls 45% of the Indian domestic airline market. It sold 20% of its equ…	business	huge rush jet airways shares indian airline jet airways initial public offering oversubscribed times bankers friday bids price range rupees jet airways lowfare airline founded londonbased extravel agent naresh goya controls indian domestic airline market sold equity shares bid raise price shares trading agreed weekend bankers demand ipo impressive domestic aviation sector promises strong growth f…	0	1	0	0	4	4	4	4	4	4	4	4	11	11	11	8	11	11	11
Bank payout to Pinochet victims A US bank has said it will donate more than $8m to victims of former Chilean military ruler Augusto Pinochet's regime under a Madrid court settlement. Riggs Bank will put money in a special fund to be managed by a Madridbased charity, the Salvador Allende Foundation, which helps abused victims. The bank had been accused of illegally concealing Gen Pinochet's assets…	business	bank payout pinochet victims bank donate victims chilean military ruler augusto pinochet regime madrid court settlement riggs bank money special fund managed madridbased charity salvador allende foundation helps abused victims bank accused illegally concealing gen pinochet assets people killed political reasons gen pinochet regime official report month court riggs bank pleaded guilty failing repo…	0	1	1	0	0	0	0	0	0	0	0	0	0	0	0	0	0	18	18
Qwest may spark MCI bidding war US phone company Qwest has said it will table a new offer for MCI after losing out to larger rival Verizon, setting the scene for a possible bidding war. MCI accepted a $6.75bn (£3.6bn) buyout from telecoms giant Verizon on Monday, rejecting a higher offer from Qwest. Qwest chairman Richard Notebaert sent a letter to MCI's board on Thursday saying that it plans to …	business	qwest spark mci bidding war phone company qwest table offer mci losing larger rival verizon setting scene bidding war mci accepted buyout telecoms giant verizon monday rejecting offer qwest qwest chairman richard notebaert letter mci board thursday plans submit offer examining verizon bid worldcom mci longdistance corporate phone firm snapping mci buyer access global telecommunications network bu…	0	0	0	0	4	6	4	4	0	0	11	11	11	11	11	11	11	11	11
Fiat chief takes steering wheel The chief executive of the Fiat conglomerate has taken daytoday control of its struggling car business in an effort to turn it around. Sergio Marchionne has replaced Herbert Demel as chief executive of Fiat Auto, with Mr Demel leaving the company. Mr Marchionne becomes the fourth head of the business which is expected to make a 800m euro ($1bn) loss in 2004 in as m…	business	fiat chief takes steering wheel chief executive fiat conglomerate daytoday control struggling car business effort sergio marchionne replaced herbert demel chief executive fiat auto demel leaving company marchionne fourth head business expected euro loss fiat underperformed market europe flat sales car business operating loss forced push breakeven target management wider shakeup business fiat reso…	0	1	0	0	0	0	0	0	0	0	0	0	11	0	11	11	0	11	0
Consumers drive French economy France's economic growth accelerated in the last three months of 2004, driven by consumer spending, a report shows. Gross domestic product (GDP) rose by 0.8% in the fourth quarter compared with the previous three month period, the statistical office INSEE said. That expansion pushed annual growth to 2.3%, the fastest rate in two years. Consumer spending was up by 1.…	business	consumers drive french economy france economic growth accelerated months driven consumer spending report gross domestic product gdp rose fourth quarter compared previous month period statistical office insee expansion pushed annual growth fastest rate consumer spending fourth quarter rebound business investment recovery extra shove analysts warned france facing challenges expanding current pace f…	0	1	0	0	4	4	4	4	4	4	4	4	4	4	4	4	11	4	4
US regulator to rule on pain drug US food and drug regulators will decide on Friday whether to recommend the sale of painkillers that have been linked to a high risk of heart attack and stroke. The Food and Drug Administration (FDA) advisory panel will give its verdict after hearing evidence for three days. The painkillers called COX2 inhibitors are sold under brand names such as Celebrex and Vio…	business	regulator rule pain drug food drug regulators decide friday recommend sale painkillers linked risk heart attack stroke food drug administration fda advisory panel verdict hearing evidence days painkillers called inhibitors sold brand names celebrex vioxx vioxx withdrawn shops merck selling fda approval fda decide benefits patients justify increased risks putting vioxx shelves boost profits merck …	0	1	0	0	0	0	0	0	8	8	8	8	9	9	9	11	9	11	11
Yukos bankruptcy 'not US matter' Russian authorities do not have to abide by any US court decisions taken with regard to troubled oil giant Yukos, a Houston court has been told. Legal expert William Butler said there was no treaty between the US and Russia to recognise the other's legal rulings. That meant Moscow would not have to adhere to US rulings in the Yukos case. Yukos says a US court was …	business	yukos bankruptcy matter russian authorities abide court decisions regard troubled oil giant yukos houston court told legal expert william butler treaty russia recognise legal rulings meant moscow adhere rulings yukos yukos court entitled declare bankrupt yugansk unit sold subsidiary local bank accounts yukos surprise chapter bankruptcy filing houston december unsuccessful attempt halt auction yug…	0	0	0	0	0	0	0	0	0	0	0	0	0	0	0	0	0	0	0
Borussia Dortmund near bust German football club and former European champion Borussia Dortmund has warned it will go bankrupt if rescue talks with creditors fail. The company's shares tumbled after it said it has "entered a lifethreatening profitability and financial situation". Borussia Dortmund has posted record losses and missed rent payments on its Westfallen stadium. Chief executive Gerd Ni…	business	borussia dortmund bust german football club european champion borussia dortmund warned bankrupt rescue talks creditors fail company shares tumbled entered lifethreatening profitability financial situation borussia dortmund posted record losses missed rent payments westfallen stadium chief executive gerd niebaum stepped week creditors pushing control shares borussia dortmund germany stockmarket li…	0	1	0	0	4	4	4	4	0	0	0	0	11	11	11	11	11	18	18
PostChristmas lull' in lending UK mortgage lending showed a "postChristmas lull" in January, indicating a slowing housing market, lenders have said. Both the Council of Mortgage Lenders (CML) and Building Society Association (BSA) said lending was down sharply. The CML said gross mortgage lending stood at £17.9bn, compared with £21.8bn in January last year. The BSA said mortgage approvals loans a…	business	postchristmas lull lending uk mortgage lending postchristmas lull january indicating slowing housing market lenders council mortgage lenders cml building society association bsa lending sharply cml gross mortgage lending stood compared january bsa mortgage approvals loans approved january time british bankers association bba lending weaker bba mortgage lending rose january increase december retur…	0	1	0	4	4	4	4	4	4	4	4	4	4	4	4	4	11	4	4
UK 'risks breaking golden rule' The UK government will have to raise taxes or rein in spending if it wants to avoid breaking its "golden rule", a report suggests. The rule states that the government can borrow cash only to invest, and not to finance its spending projects. The National Institute of Economic and Social Research (NIESR) claims that taxes need to rise by about £10bn if state finances…	business	uk breaking golden rule uk government raise taxes rein spending avoid breaking golden rule report suggests rule government borrow cash invest finance spending projects national institute economic social niesr claims taxes rise finances treasury plans track funded niesr government current economic cycle runs march golden rule met cycle earlier chances improve fiscal tightening niesr report call qu…	0	1	0	1	4	4	4	4	4	4	4	1	4	4	1	4	11	4	1
Worldcom director ends evidence The former chief financial officer at US telecoms firm WorldCom has finished giving evidence at the trial of his exboss Bernie Ebbers. Scott Sullivan admitted to jurors he was willing to commit fraud to meet Wall Street earnings projections. Mr Ebbers is on trial for fraud and conspiracy in relation to WorldCom's collapse in 2002. He pleads not guilty. Mr Sullivan …	business	worldcom director evidence chief financial officer telecoms firm worldcom finished evidence trial exboss bernie ebbers scott sullivan admitted jurors commit fraud meet wall street earnings projections ebbers trial fraud conspiracy relation worldcom collapse pleads guilty sullivan spent days crossexamined lawyers worldcom chief executive ebbers attorney reid weingarten attempted portray sullivan l…	0	0	0	0	0	0	0	4	0	0	0	0	0	9	9	11	0	11	11
Ukraine steel selloff 'illegal' The controversial selloff of a Ukrainian steel mill to a relative of the former president was illegal, a court has ruled. The mill, Krivorizhstal, was sold in June 2004 for $800m (£424m) well below other offers. President Viktor Yushchenko, elected in December, is planning to revisit many of Ukraine's recent privatisations. Krivorizhstal is one of dozens of firms w…	business	ukraine steel selloff controversial selloff ukrainian steel mill relative president illegal court ruled mill krivorizhstal sold june offers president viktor yushchenko elected december planning revisit ukraine privatisations krivorizhstal dozens firms sold cheaply friends previous administration wednesday prime minister yulia tymoshenko firms included list firms sale reviewed yushchenko list limi…	0	1	0	0	0	0	0	0	0	0	0	0	0	0	0	0	0	0	0
Cairn shares up on new oil find Shares in Cairn Energy have jumped 6% after the firm said an Indian oilfield was larger than previously thought. Cairn said drilling to the northwest of its development site in Rajasthan had produced "very strong results". The company also said it now believed the development area would be able to produce oil for more than 25 years. Cairn's share price rose 300% la…	business	cairn shares oil shares cairn energy jumped firm indian oilfield larger cairn drilling northwest development site rajasthan produced strong company believed development produce oil cairn share price rose oil shares hit december disappointing drilling update december share fall cairn danger relegated ftse reshuffled month cairn shares closed pence thursday christmas cairn revealed drilling north f…	0	1	0	0	0	0	0	0	0	0	0	4	0	0	0	0	0	0	0
Georgia plans hidden asset pardon Georgia is offering a oneoff 'tax amnesty' to people who hid their earnings under the regime of former president Eduard Shevardnadze. The country's new president, Mikhail Saakashvili, has said that anyone now willing to disclose their wealth will only have to pay 1% in income tax. The measure is designed to legitimise previously hidden economic activity and boost…	business	georgia plans hidden asset pardon georgia offering oneoff amnesty people earnings regime president eduard shevardnadze country president mikhail saakashvili disclose wealth pay income tax measure designed legitimise hidden economic activity boost georgia flagging economy georgia black market estimated size legal economy saakashvili elected president january shevardnadze toppled urged georgian par…	1	1	1	1	1	1	1	1	1	1	1	1	1	1	1	1	1	1	1
Cuba winds back economic clock Fidel Castro's decision to ban all cash transactions in US dollars in Cuba has once more turned the spotlight on Cuba's ailing economy. All conversions between the US dollar and Cuba's "convertible" peso will from 8 November be subject to a 10% tax. Cuban citizens, who receive money from overseas, and foreign visitors, who change dollars in Cuba, will be affected. C…	business	cuba winds economic clock fidel castro decision ban cash transactions dollars cuba spotlight cuba ailing economy conversions dollar cuba convertible peso november subject tax cuban citizens receive money overseas foreign visitors change dollars cuba critics measure argue step backwards reflecting cuban president desire increase control economy clamp private enterprise live television broadcast an…	1	1	0	0	1	1	1	4	4	4	8	8	8	8	8	8	8	8	4
Novartis hits acquisition trail Swiss drugmaker Novartis has announced 5.65bn euros ($7.4bn; £3.9bn) of purchases to make its Sandoz unit the world's biggest generic drug producer. Novartis, which last month forecast record sales for 2005, said it had bought all of Germany's Hexal. It also acquired 67.7% of Hexal's US affiliate Eon Labs, and offered to buy the remaining shares for $31 each. Novar…	business	novartis hits acquisition trail swiss drugmaker novartis announced euros purchases sandoz unit biggest generic drug producer novartis month forecast record sales bought germany hexal acquired hexal affiliate eon labs offered buy remaining shares novartis cost savings acquisitions novartis shares rose swiss francs trading deal novartis sandoz business overtake israel teva pharmaceuticals biggest m…	0	1	0	0	4	4	4	0	4	0	4	0	11	11	11	11	11	11	11
MCI shareholder sues to stop bid A shareholder in US phone firm MCI has taken legal action to halt a $6.75bn (£3.6bn) buyout by telecoms giant Verizon, hoping to get a better deal. The lawsuit was filed on Friday after Qwest Communications, which had an earlier offer for MCI rejected, said it would submit an improved bid. MCI's directors have backed Verizon, despite it tabling less money. They ar…	business	mci shareholder sues bid shareholder phone firm mci legal action halt buyout telecoms giant verizon hoping deal lawsuit filed friday qwest communications earlier offer mci rejected submit improved bid mci directors verizon tabling money accused breaching fiduciary duties depriving mci shareholders maximum legal papers filed delaware court verizon set pay unconscionable unfair grossly inadequate s…	0	0	0	0	4	6	4	0	0	0	11	11	11	11	11	11	0	11	11
Standoff' on Deutsche's LSE bid Deutsche Boerse investors unhappy with its London Stock Exchange bid will have no chance to throw out the exchange's management until May, Reuters says. The Sunday Times reported that hedge funds TCI and Atticus were planning to demand the removal of the group's chairman and chief executive. But Deutsche Boerse told news agency Reuters such a move would have to wai…	business	standoff deutsche lse bid deutsche boerse investors unhappy london stock exchange bid chance throw exchange management reuters sunday times reported hedge funds tci atticus planning demand removal chairman chief executive deutsche boerse told news agency reuters move wait annual meeting investors deutsche return cash shareholders bid longterm investors experienced removing management scared concl…	0	0	0	0	4	4	4	0	0	0	11	0	11	11	11	11	0	18	18
Bush to outline 'toughest' budget President Bush is to send his toughest budget proposals to date to the US Congress, seeking large cuts in domestic spending to lower the deficit. About 150 federal programs could be cut or axed altogether as part of a $2.5 trillion (£1.3 trillion) package aimed at curbing the giant US budget deficit. Defence spending will rise, however, while the proposals exclud…	business	bush outline budget president bush send toughest budget proposals congress seeking cuts domestic spending lower deficit federal programs cut axed altogether trillion trillion package aimed curbing giant budget deficit defence spending rise proposals exclude cost continuing military operations iraq vicepresident dick cheney budget tightest heart administration budget congress monday austere packag…	0	1	0	1	1	1	1	1	4	4	1	1	4	4	4	1	1	4	4
Orange colour clash set for court A row over the colour orange could hit the courts after mobile phone giant Orange launched action against a new mobile venture from Easyjet's founder. Orange said it was starting proceedings against the Easymobile service for trademark infringement. Easymobile uses Easygroup's orange branding. Founder Stelios HajiIoannou has pledged to contest the action. The mov…	business	orange colour clash set court row colour orange hit courts mobile phone giant orange launched action mobile venture easyjet founder orange starting proceedings easymobile service trademark infringement easymobile easygroup orange branding founder stelios hajiioannou pledged contest action move failed agreement months talks orange claims lowcost mobile service infringed rights colour orange confus…	1	2	3	3	3	3	7	7	7	7	7	7	7	7	7	7	7	7	7
Standard Life cuts policy bonuses Standard Life, Europe's largest mutual life insurer, has cut bonuses for withprofit policyholders. Annual bonus rates on its withprofits life policies were cut from 2.5% to 2%, while bonuses on pension policies were reduced from 3.25% to 2.5%. It is the sixth time in three years Standard Life has made cuts to bonus rates, despite an 8.7% rise in the value of the …	business	standard life cuts policy bonuses standard life europe largest mutual life insurer cut bonuses withprofit policyholders annual bonus rates withprofits life policies cut bonuses pension policies reduced sixth time standard life cuts bonus rates rise withprofits fund insurer blamed cuts poor share returns low rates withprofits policies designed smooth peaks troughs stock market volatility profits r…	0	1	0	0	4	4	4	4	4	4	4	4	11	11	11	11	11	4	4
EMI shares hit by profit warning Shares in music giant EMI have sunk by more than 16% after the firm issued a profit warning following disappointing sales and delays to two album releases. EMI said music sales for the year to March will fall 89% from the year before, with profits set to be 15% lower than analysts had expected. It blamed poor sales since Christmas and delays to the releases of new…	business	emi shares hit profit warning shares music giant emi sunk firm issued profit warning disappointing sales delays album releases emi music sales march fall profits set lower analysts expected blamed poor sales christmas delays releases albums coldplay gorillaz gmt monday emi shares pence emi major albums scheduled release financial march coldplay gorillaz release dates emi music sales reorders janu…	1	2	0	0	4	4	4	7	4	4	4	4	7	7	11	7	11	7	7
China's Shanda buys stake in Sina Chinese online game operator Shanda Interactive Entertainment has bought a 20% stake in Sina, the country's biggest internet portal firm. The move may be a precursor to a full takeover, with analysts saying that a betterknown international firm may also now show an interest in Sina. Shanda said that it may boost its stake in Sina, even buying it outright. A merge…	business	china shanda buys stake sina chinese online game operator shanda interactive entertainment bought stake sina country biggest internet portal firm move precursor takeover analysts betterknown international firm sina shanda boost stake sina buying outright merger create firm offers online roleplaying games news entertainment wireless messaging sina purchase stake shanda impact business board direct…	0	1	0	0	4	4	0	0	0	0	0	0	11	11	11	11	0	11	0
Mixed reaction to Man Utd offer Shares in Manchester United were up over 5% by noon on Monday following a new offer from Malcolm Glazer. The board of Man Utd is expected to meet early this week to discuss the latest proposal from the US tycoon that values the club at £800m ($1.5bn). Manchester United revealed on Sunday that it had received a detailed proposal from Mr Glazer. A senior source at th…	business	mixed reaction utd offer shares manchester united noon monday offer malcolm glazer board utd expected meet week proposal tycoon values club manchester united revealed sunday received detailed proposal glazer senior source club told bbc time board obliged deal utd supporters club urged club reject deal manchester united footballers eric cantona ole gunnar solskjaer club manager sir alex ferguson l…	0	0	0	4	4	1	1	1	1	1	1	1	1	1	1	11	1	18	1
Gold falls on IMF sale concerns The price of gold has fallen after the International Monetary Fund (IMF) said it will look at ways of using its gold reserves to provide debt relief. By revaluing its holdings, the IMF may be able to sell billions of dollars of gold and use the cash to cancel debts owed by the world's poorest nations. The plan was put forward by G7 finance ministers over the weeken…	business	gold falls imf sale concerns price gold fallen international monetary fund imf gold reserves provide debt relief revaluing holdings imf sell billions dollars gold cash cancel debts owed poorest nations plan forward finance ministers weekend price gold fell ounce asia rebounding european trading imf boss rodrigo rato ministers carry study feasibility revaluing selling gold reserves expected conclu…	0	1	0	0	4	4	6	4	4	4	1	4	4	4	11	8	6	4	6
Electronics firms eye plasma deal Consumer electronics giants Hitachi and Matshushita Electric are joining forces to share and develop technology for flat screen televisions. The tieup comes as the world's top producers are having to contend with falling prices and intense competition. The two Japanese companies will collaborate in research development, production, marketing and licensing. They s…	business	electronics firms eye plasma deal consumer electronics giants hitachi matshushita electric joining forces share develop technology flat screen televisions tieup top producers contend falling prices intense competition japanese companies collaborate development production marketing licensing agreement enable companies expand plasma display tv market globally plasma display panels thin tvs replacin…	1	2	3	3	3	3	7	7	7	7	7	7	7	7	7	15	0	17	7
MG Rover China tieup 'delayed' MG Rover's proposed tieup with China's top carmaker has been delayed due to concerns by Chinese regulators, according to the Financial Times. The paper said Chinese officials had been irritated by Rover's disclosure of its talks with Shanghai Automotive Industry Corp in October. The proposed deal was seen as crucial to safeguarding the future of Rover's Longbridge p…	business	rover china tieup rover proposed tieup china top carmaker delayed concerns chinese regulators financial times paper chinese officials irritated rover disclosure talks shanghai automotive industry corp october proposed deal crucial safeguarding future rover longbridge plant west midlands growing fears deal result job losses observer reported sunday half workforce longbridge threat deal ahead shang…	0	1	0	0	4	4	4	4	4	0	0	4	4	4	8	8	8	18	9
US bank boss hails 'genius' Smith US Federal Reserve chairman Alan Greenspan has given a speech at a Scottish church in honour of the pioneering economist, Adam Smith. He delivered the 14th Adam Smith Lecture in Kirkcaldy, Fife. The Adam Smith Lecture celebrates the author of 1776's Wealth of Nations, which became a bible of capitalism. Dr Greenspan was invited by Chancellor Gordon Brown, whose m…	business	bank boss hails smith federal reserve chairman alan greenspan speech scottish church honour pioneering economist adam smith delivered adam smith lecture kirkcaldy fife adam smith lecture celebrates author wealth nations bible capitalism dr greenspan invited chancellor gordon brown minister father john preach st bryce kirk church brown introduced dr greenspan invited guests economist dr greenspan …	1	1	1	1	1	1	1	1	1	1	1	12	12	4	12	12	1	12	4
Economy 'strong' in election year UK businesses are set to prosper during the next few months but this could trigger more interest rate rises, according to a report. Optimism is at its highest since 1997 and business will reap the benefits of a continuing rise in public spending, say researchers at BDO Stoy Hayward. The Bank of England is expected to keep rates on hold this week but they could go…	business	economy election uk businesses set prosper months trigger rate rises report optimism business reap benefits continuing rise public spending researchers bdo stoy hayward bank england expected rates hold week rates rise anticipated election bdo optimism leading indicator gdp growth quarters ahead edged january october rise increase public spending increased merger acquisition activity blighting bus…	0	1	0	0	4	4	4	4	4	4	4	4	4	4	4	4	11	4	4
SEC to rethink postEnron rules The US stock market watchdog's chairman has said he is willing to soften tough new US corporate governance rules to ease the burden on foreign firms. In a speech at the London School of Economics, William Donaldson promised "several initiatives". European firms have protested that US laws introduced after the Enron scandal make Wall Street listings too costly. The U…	business	rethink postenron rules stock market watchdog chairman soften tough corporate governance rules ease burden foreign firms speech london school economics william donaldson promised initiatives european firms protested laws introduced enron scandal wall street listings costly regulator foreign firms extra time comply key clause sarbanesoxley force obliges firms stock market listings declarations cri…	0	1	0	0	0	0	0	0	0	0	0	0	0	0	0	8	0	0	0
Nissan names successor to Ghosn Nissan has named a lifetime employee to run its operations after Carlos Ghosn, its highly successful boss, takes charge at Renault. As chief operating officer, Toshiyuki Shiga will run Nissan on a daily basis, although Mr Ghosn, who masterminded its recovery, will remain chief executive. Mr Ghosn is to become chairman and chief executive of Renault, which owns 44% …	business	nissan names successor ghosn nissan named lifetime employee operations carlos ghosn highly successful boss takes charge renault chief operating officer toshiyuki shiga nissan daily basis ghosn masterminded recovery remain chief executive ghosn chairman chief executive renault owns japanese carmaker april ghosn transformed nissan fastgrowing profitable business shiga nominally serve ghosn deputy n…	0	1	0	0	4	4	4	4	4	4	4	4	4	4	11	4	4	4	4
Ukraine trims privatisation check Ukraine is to review "dozens" of state asset sales as the country's new administration tackles corruption. The figure announced by President Viktor Yushchenko is less than the 3,000 cases mentioned last week, but will cover many of the biggest deals. Ukraine recently ousted longserving leader Leonid Kuchma and has said it wants closer European Union links. In a s…	business	ukraine trims privatisation check ukraine review dozens asset sales country administration tackles corruption figure announced president viktor yushchenko mentioned week cover biggest deals ukraine ousted longserving leader leonid kuchma closer european union links separate statement eu ukraine entry trade organisation comments viktor yushchenko prepared head brussels meet president george bush n…	0	1	0	0	0	0	0	0	0	0	0	0	0	0	0	0	0	0	0
Absa and Barclays talks continue South Africa biggest retail bank Absa has said it is still in talks with UK bank Barclays over the sale of majority stake in the group. In November, Absa said it was close to striking a deal with Barclays. But the group said Barclays is still waiting for the approval of South Africa's banking and competition authorities to make a formal offer. Absa also announced …	business	absa barclays talks continue south africa biggest retail bank absa talks uk bank barclays sale majority stake november absa close striking deal barclays barclays waiting approval south africa banking competition authorities formal offer absa announced expects earnings grow current financial discussions barclays continuing shareholders advised agreement reached offer barclays acquire majority stak…	0	1	0	0	4	4	4	4	4	4	4	4	11	11	11	11	11	11	11
Rescue hope for Borussia Dortmund Shares in struggling German football club Borussia Dortmund slipped on Monday despite the club agreeing a rescue plan with creditors on Friday. The club, which has posted record losses and racked up debts, said last week that it was in "a lifethreatening profitability and financial situation". Creditors agreed on Friday to suspend interest payments until 2007. Ne…	business	rescue hope borussia dortmund shares struggling german football club borussia dortmund slipped monday club agreeing rescue plan creditors friday club posted record losses racked debts week lifethreatening profitability financial situation creditors agreed friday suspend payments news deal boosted shares club friday stock slipped monday morning addition interestpayment freeze borussia dortmund sho…	0	0	0	0	4	4	4	0	0	0	0	0	11	11	11	11	11	18	18
Standard Life concern at LSE bid Standard Life is the latest shareholder in Deutsche Boerse to express concern at the German stock market operator's plans to buy the London Stock Exchange. It said Deutsche Boerse had to show why its planned £1.35bn ($2.5bn) offer for the LSE was good for shareholder value. Reports say Standard Life, which owns a 1% stake in Deutsche Boerse, may seek a shareholder…	business	standard life concern lse bid standard life shareholder deutsche boerse express concern german stock market operator plans buy london stock exchange deutsche boerse planned offer lse shareholder reports standard life owns stake deutsche boerse seek shareholder vote issue fellow shareholders usbased hedge fund atticus capital ukbased tci fund management expressed doubts deutsche boerse supervisory…	0	0	0	0	4	4	4	0	0	0	11	11	11	11	11	11	11	18	18
BP surges ahead on high oil price Oil giant BP has announced a 26% rise in annual profits to $16.2bn (£8.7bn) on the back of record oil prices. Last week, rival Shell reported an annual profit of $17.5bn a record profit for a UKlisted company. BP added that it was increasing its fourthquarter dividend by 26% to 8.5 cents, and that it would continue with share buybacks. BP chief executive Lord Bro…	business	bp surges ahead oil price oil giant bp announced rise annual profits record oil prices week rival shell reported annual profit record profit uklisted company bp increasing fourthquarter dividend cents continue share buybacks bp chief executive lord browne strong operationally financially company earning hour record annual profits figure bp performance expectations city analysts bp share price ros…	0	1	0	0	4	4	4	4	4	4	4	4	4	0	11	4	0	4	4
Oil companies get Russian setback International oil and mining companies have reacted cautiously to Russia's decision to bar foreign firms from natural resource tenders in 2005. US oil giant Exxon said it did not plan to take part in a new tender on a project for which it had previously signed a preliminary agreement. Miner Highland Gold said it regretted any limit on privatisation while BP, a bi…	business	oil companies russian setback international oil mining companies reacted cautiously russia decision bar foreign firms natural resource tenders oil giant exxon plan tender project signed preliminary agreement miner highland gold regretted limit privatisation bp investor declined comment firms russianowned permitted bid federal natural resources agency government letting russian companies develop s…	0	1	0	0	0	0	0	0	0	0	0	0	0	0	0	0	0	0	0
Gaming firm to sell UK dog tracks Six UK greyhound tracks have been put up for sale by gaming group Wembley as part of a move which will lead to the breakup of the group. Wembley announced the planned sale as it revealed it was to offload its US gaming division to BLB Investors. US gaming consortium BLB will pay $339m (£182.5m) for the US unit, although the deal is subject to certain conditions. …	business	gaming firm sell uk dog tracks uk greyhound tracks sale gaming wembley move lead breakup wembley announced planned sale revealed offload gaming division blb investors gaming consortium blb pay unit deal subject conditions blb holds stake wembley close buying firm takeover deal shares wembley pence midmorning sale gaming unit leave wembley uk business includes greyhound tracks wimbledon london bel…	0	0	0	0	4	0	0	0	0	0	0	0	6	11	6	6	0	0	6
Man Utd to open books to Glazer Manchester United's board has agreed to give US tycoon Malcolm Glazer access to its books. Earlier this month, Mr Glazer presented the board with detailed proposals on an offer to buy the football club. In a statement, the club said it would allow Mr Glazer "limited due diligence" to give him the opportunity to take the proposal on to a formal bid. But it said it c…	business	utd books glazer manchester united board agreed tycoon malcolm glazer access books earlier month glazer board detailed proposals offer buy football club statement club glazer limited diligence opportunity proposal formal bid continued oppose glazer plans calling assumptions aggressive plan damaging manchester united supporters shares club fanbased shareholders united opposed takeover glazer fans …	0	0	0	1	4	1	1	1	1	0	1	1	1	1	11	1	1	18	1
Sales 'fail to boost High Street' The January sales have failed to help the UK High Street recover from a poor Christmas season, a survey has found. Stores received a boost from bargain hunters but trading then reverted to December levels, the British Retail Consortium and accountants KPMG said. Sales in what is traditionally a strong month rose by 0.5% on a likeforlike basis, compared with a yea…	business	sales boost street january sales failed uk street recover poor christmas season survey stores received boost bargain hunters trading reverted december levels british retail consortium accountants kpmg sales traditionally strong month rose likeforlike basis compared earlier consumers remain cautious buying bigticket items furniture brc director kevin hawkins rates uncertainty housing market contin…	0	1	0	0	4	4	4	4	4	4	4	4	4	4	4	4	11	4	4
McDonald's to sponsor MTV show McDonald's, the world's largest restaurant chain, is to sponsor a programme on music channel MTV as part of its latest youth market promotion. The show Advance Warning highlights new talent and MTV reckons it will give McDonald's access to nearly 400 million homes in 162 countries. McDonald's golden arches, name and "I'm loving it" catchphrase will be used throughou…	business	mcdonald sponsor mtv mcdonald largest restaurant chain sponsor programme music channel mtv youth market promotion advance warning highlights talent mtv reckons mcdonald access homes countries mcdonald golden arches loving catchphrase halfhour programme move amid growing concerns obesity europe european union called food industry reduce adverts aimed children warning legislation introduced volunta…	1	2	0	2	2	2	2	2	2	2	11	11	11	11	11	11	11	11	11
Call to save manufacturing jobs The Trades Union Congress (TUC) is calling on the government to stem job losses in manufacturing firms by reviewing the help it gives companies. The TUC said in its submission before the Budget that action is needed because of 105,000 jobs lost from the sector over the last year. It calls for better pensions, child care provision and decent wages. The 36page submis…	business	call save manufacturing jobs trades union congress tuc calling government stem job losses manufacturing firms reviewing companies tuc submission budget action jobs lost sector calls pensions child care provision decent wages submission urges government examine support european countries provide industry tuc secretary brendan barber called commitment policies real difference lives people investmen…	1	1	1	1	1	1	1	8	8	8	8	8	8	8	8	8	8	8	8
Tsunami 'to hit Sri Lanka banks' Sri Lanka's banks face hard times following December's tsunami disaster, officials have warned. The Sri Lanka Banks Association said the waves which killed more than 30,000 people also washed away huge amounts of property which was securing loans. According to its estimate, as much as 13.6% of the loans made by private banks to clients in the disaster zone has bee…	business	tsunami hit sri lanka banks sri lanka banks hard times december tsunami disaster officials warned sri lanka banks association waves killed people washed huge amounts property securing loans estimate loans private banks clients disaster zone written damaged stateowned lenders worse hit association estimates private banking sector rupees loans outstanding disaster zone hand banks dealing death cust…	0	1	0	0	4	4	4	4	4	4	8	8	8	8	8	8	8	18	18
Shares rise on new Man Utd offer Shares in Manchester United closed up 4.75% on Monday following a new offer from US tycoon Malcolm Glazer. The board of the football club is expected to meet early this week to discuss the latest proposal, which values the club at £800m ($1.5bn). Manchester United revealed on Sunday that it had received a detailed proposal from Mr Glazer, which looks set to receiv…	business	shares rise utd offer shares manchester united closed monday offer tycoon malcolm glazer board football club expected meet week proposal values club manchester united revealed sunday received detailed proposal glazer set receive scrutiny club rejected glazer approaches hand senior source club told bbc time supporters shareholders united urged club reject deal spokesman shareholders united differe…	0	0	0	1	4	1	1	1	1	1	1	1	11	11	1	11	1	18	18
Yukos drops banks from court bid Russian oil company Yukos has dropped the threat of legal action against five banks it had accused of involvement in the sale of its key Yugansk unit. Stateowned Rosneft bought the unit for $9.3bn (£5bn) after Yukos was forced to sell assets to meet a $27.5bn tax bill. Yukos says the sale was illegal and is pursuing damages in a US court. Its lawyers now accept AB…	business	yukos drops banks court bid russian oil company yukos dropped threat legal action banks accused involvement sale key yugansk unit stateowned rosneft bought unit yukos forced sell assets meet tax bill yukos sale illegal pursuing damages court lawyers accept abn amro bnp paribas calyon jp morgan chase bank dresdner kleinwort wasserstein involved sale financing yukos outstanding complaint deutsche b…	0	0	0	0	0	0	0	0	0	0	0	0	0	0	0	0	0	0	0
Venezuela reviews foreign deals Venezuela is to review all foreign investment in its mining industries in an effort to strengthen its indigenous industrial output. President Hugo Chavez has ordered all existing contracts with foreign firms to be examined to see if they provide maximum benefits to the country. The review will cover production of gold, aluminium and iron ore although it excludes th…	business	venezuela reviews foreign deals venezuela review foreign investment mining industries effort strengthen indigenous industrial output president hugo chavez existing contracts foreign firms examined provide maximum benefits country review cover production gold aluminium iron ore excludes country oil sector chavez sought extend role sectors economy leftwing president conducting controversial review …	0	1	0	0	0	0	0	0	0	0	0	0	0	0	0	8	0	0	0
Lloyd's of London head chides FSA The head of Lloyd's of London, the insurance market, has criticised Britain's financial watchdog, the Financial Services Authority (FSA). In a speech on Monday, Mr Prettejohn urged the FSA to force brokers to disclose the size of their commissions. "The FSA should change, and change now" said Mr Prettejohn, who wants it to move from "disclosure on request" to man…	business	lloyd london head chides fsa head lloyd london insurance market criticised britain financial watchdog financial services authority fsa speech monday prettejohn urged fsa force brokers disclose size commissions fsa change change prettejohn move disclosure request mandatory disclosure call speech improving london insurance market fsa bide time seize moment prettejohn lloyd chief executive fsa regul…	0	1	0	0	0	0	0	0	0	0	0	0	0	0	0	11	8	18	0
Bat spit drug firm goes to market A German firm whose main product is derived from the saliva of the vampire bat is looking to raise more than 70m euros ($91m; £49m) on the stock market. The firm, Paion, said that it hoped to sell 5 million shares a third of the firm for 1114 euros a share. Its main drug, desmoteplase, is based on a protein in the bat's saliva. The protein stops blood from clotti…	business	bat spit drug firm market german firm main product derived saliva vampire bat raise euros stock market firm paion hoped sell shares firm euros share main drug desmoteplase based protein bat saliva protein stops blood clotting helps bat drink victims stroke sufferers company shares sale week scheduled start trading frankfurt stock exchange february final price top range company valued euros money …	0	1	0	0	0	0	0	0	0	0	0	0	11	11	11	11	0	18	18
Vodafone appoints new Japan boss Vodafone has drafted in its UK chief executive William Morrow to take charge of its troubled Japanese operation. Mr Morrow will succeed Shiro Tsuda as president of Vodafone KK, Japan's number three mobile operator, in April. Mr Tsuda, who will become chairman, was appointed president only two months ago but the business has struggled since then, losing customers i…	business	vodafone appoints japan boss vodafone drafted uk chief executive william morrow charge troubled japanese operation morrow succeed shiro tsuda president vodafone kk japan mobile operator april tsuda chairman appointed president months ago business struggled losing customers january vodafone pinned hopes launch phones november demand slow customers japan vodafone difficult satisfy japan technologic…	0	2	0	0	4	4	4	4	4	7	4	7	11	11	11	7	11	7	4
Pension hitch for longliving men Male life expectancy is much higher than originally estimated, leading pension researchers have said. The Pensions Policy Institute (PPI) said life expectancy for unskilled and professional men has been understated. Life expectancy at birth is 71 years for a manual worker and 79 years for a professional a gap of eight years. But if measured at age 65 instead, the …	business	pension hitch longliving male life expectancy originally estimated leading pension researchers pensions policy institute ppi life expectancy unskilled professional understated life expectancy birth manual worker professional gap measured age ppi manual worker live professional worker gap ppi estimate excludes people died reach age takes account ongoing improvements life expectancy government rule…	1	1	1	1	1	1	4	8	8	8	8	8	8	8	12	1	1	8	8
Card fraudsters 'targeting web' New safeguards on credit and debit card payments in shops has led fraudsters to focus on internet and phone payments, an antifraud agency has said. Antifraud consultancy Retail Decisions says 'cardnotpresent' fraud, where goods are paid for online or by phone, has risen since the start of 2005. The introduction of 'chip and pin' cards has tightened security for tra…	business	card fraudsters web safeguards credit debit card payments shops led fraudsters focus internet phone payments antifraud agency antifraud consultancy retail decisions fraud paid online phone risen start introduction pin cards tightened security transactions street clampdown caused fraudsters change tack retail decisions introduction chip pin cards aimed cut credit card fraud stores shoppers verify …	1	1	3	3	3	3	3	3	3	8	11	11	13	13	13	13	13	13	13
Britannia members' £42m windfall More than 800,000 Britannia Building Society members are to receive a profit share worth on average £52 each. Members of the UK's second largest building society will share £42m, with 100,000 receiving a windfall of more than £100. Depending on how much they borrow or invest, members earn "reward" points which entitle them to a share of the society's profits. The …	business	britannia windfall britannia building society receive profit share worth average uk largest building society share receiving windfall depending borrow invest earn reward entitle share society profits payouts bigger stricter eligibility rules britannia shared average payment qualify payment customers december britannia stopped payments worth qualify profit share mortgage investment account deposit…	0	1	0	0	4	4	4	4	4	4	4	4	13	13	13	13	13	13	13
Firms pump billions into pensions Employers have spent billions of pounds propping up their final salary pensions over the past year, research suggests. A survey of 280 schemes by Incomes Data Services' (IDS) said employer contributions had increased from £5.5bn to £8.2bn a year, a rise of 49.7%. Companies facing the biggest deficits had raised their pension contributions by 100% or more, IDS sai…	business	firms pump billions pensions employers spent billions pounds propping final salary pensions suggests survey schemes incomes data services ids employer contributions increased rise companies facing biggest deficits raised pension contributions ids firms struggling type scheme rising costs increased liabilities final salary scheme defined benefit scheme promises pay pension salary scheme earning re…	1	1	1	1	1	1	1	8	8	8	8	8	8	8	8	1	1	8	8
UK homes hit £3.3 trillion total The value of the UK's housing stock reached the £3.3 trillion mark in 2004 triple the value 10 years earlier, a report indicates. Research from Halifax, the country's biggest mortgage lender, suggests the value of private housing stock is continuing to rise steadily. All regions saw at least a doubling in their assets during the past decade. But Northern Ireland l…	business	uk homes hit trillion total uk housing stock reached trillion mark triple earlier report halifax country biggest mortgage lender suggests private housing stock continuing rise steadily regions doubling assets decade northern ireland led rise scotland increase core retail price rose period underlining effective investment housing people decade uk private housing assets representing trillion pounds…	0	1	0	0	4	4	4	4	4	4	4	4	4	4	4	4	11	4	4
Economy 'strong' in election year UK businesses are set to prosper during the next few months but this could trigger more interest rate rises, according to a report. Optimism is at its highest since 1997 and business will reap the benefits of a continuing rise in public spending, say researchers at BDO Stoy Hayward. The Bank of England is expected to keep rates on hold this week but they could go…	business	economy election uk businesses set prosper months trigger rate rises report optimism business reap benefits continuing rise public spending researchers bdo stoy hayward bank england expected rates hold week rates rise anticipated election bdo optimism leading indicator gdp growth quarters ahead edged january october rise increase public spending increased merger acquisition activity blighting bus…	0	1	0	0	4	4	4	4	4	4	4	4	4	4	4	4	11	4	4
G7 backs Africa debt relief plan G7 finance ministers have backed plans to write off up to 100% of the debts of some of the world's poorest countries. UK chancellor Gordon Brown said the London meeting of the world's seven richest nations would be remembered as "the 100% debt relief summit". Some 37 countries could benefit after a casebycase review by bodies including the World Bank and the IMF, …	business	africa debt relief plan finance ministers plans write debts poorest countries uk chancellor gordon brown london meeting richest nations remembered debt relief summit countries benefit casebycase review bodies including bank imf support brown international finance facility boost aid developing countries bbc correspondents meeting produced movement uk ambitions brown major breakthrough internationa…	0	1	0	1	1	1	6	1	1	1	1	1	1	1	1	1	1	1	1
QA: Malcolm Glazer and Man Utd The battle for control of Manchester United has taken another turn after the club confirmed it had received a fresh takeover approach from US business tycoon Malcolm Glazer. No formal offer has been made yet, but Manchester United have confirmed they have received a "detailed proposal" from the US entrepreneur which could lead to a bid. Reports have put the offer at…	business	qa malcolm glazer utd battle control manchester united club confirmed received fresh takeover approach business tycoon malcolm glazer formal offer manchester united confirmed received detailed proposal entrepreneur lead bid reports offer share manchester united approach owner tampa bay buccaneers american football team reportedly led sons avi joel previous approach united board glazer october bbc…	0	0	0	4	4	4	1	1	1	1	1	1	1	11	1	11	1	18	1
Making your office work for you Our mission to brighten up your working lives continues and this time, we're taking a long hard look at your offices. Over the next few months, our panel of experts will be listening to your gripes about where you work, and suggesting ways to make your workspace more efficient, more congenial or simply prettier. This week, we're hearing from Marianne Petersen, who …	business	office mission brighten lives continues time hard offices months panel experts listening gripes suggesting workspace efficient congenial simply prettier week hearing marianne petersen planning convert barn sweden base freelance writing click link photograph read story scroll panel series bottom story touch multitude challenges understanding personality terms style feel confident output conferring…	1	2	3	3	3	3	7	7	7	7	7	7	7	7	7	7	17	7	7
Market unfazed by Aurora setback As the Aurora limped back to its dock on 20 January, a blizzard of photos and interviews seemed to add up to an unambiguous tale of woe. The ship had another slice of bad luck to add to its history of health scares and technical trouble. And its owner, PO Cruises now part of the huge US Carnival Corporation was looking at a significant slice chopped off this year'…	business	market unfazed aurora setback aurora limped dock january blizzard photos interviews add unambiguous tale woe ship slice bad luck add history health scares technical trouble owner po cruises huge carnival corporation slice chopped profits potential pr fiasco told stock markets warning fivecent hit earnings hours biggest investment banks upped target carnival share price investors barely blinked gm…	0	1	0	0	0	0	0	0	0	10	11	11	11	11	11	11	11	11	11
The 'ticking budget' facing the US The budget proposals laid out by the administration of US President George W Bush are highly controversial. The Washingtonbased Economic Policy Institute, which tends to be critical of the President, looks at possible fault lines. US politicians and citizens of all political persuasions are in for a dose of shock therapy. Without major changes in current policie…	business	budget facing budget proposals laid administration president george bush highly controversial washingtonbased economic policy institute critical president fault lines politicians citizens political persuasions dose shock therapy major current policies political prejudices federal budget simply hold news coverage bush budget dominated debates spending cuts cuts programs standpoint fiscal trends cu…	0	1	0	1	4	4	4	4	4	4	4	4	4	4	4	4	1	4	4
Ebbers 'aware' of WorldCom fraud Former WorldCom boss Bernie Ebbers was directly involved in the $11bn financial fraud at the firm, his closest associate has told a US court. Giving evidence in the criminal trial of Mr Ebbers, exfinance chief Scott Sullivan implicated his colleague in the accounting scandal at the firm. Mr Sullivan, WorldCom's former number two, is the government's chief witness …	business	ebbers worldcom fraud worldcom boss bernie ebbers directly involved financial fraud firm closest associate told court evidence criminal trial ebbers exfinance chief scott sullivan implicated colleague accounting scandal firm sullivan worldcom government chief witness ebbers ebbers denied multiple charges conspiracy fraud senior worldcom executives accused orchestrating huge fraud telecoms company…	0	0	0	0	0	0	0	0	0	0	0	0	0	9	9	11	0	18	18
Renault boss hails 'great year' Strong sales outside western Europe helped Renault boost its profits by more than 40% in 2004 although the firm warned of lower margins this year. France's second largest carmaker enjoyed a healthy 43% rise in net profits to 2.4bn euros ($3.1bn; £2.9bn) as sales rose 8% to 40.7bn euros. The firm said strong demand outside western Europe and the good performance of …	business	renault boss hails strong sales western europe helped renault boost profits firm warned lower margins france largest carmaker enjoyed healthy rise net profits euros sales rose euros firm strong demand western europe performance megane range lifted chairman louis schweitzer firm renault sold vehicles increase previous growth western europe strong sales turkey russia north africa total sales wester…	0	1	0	0	4	4	4	4	4	4	4	4	4	4	11	4	11	4	4
Survey confirms property slowdown Government figures have confirmed a widely reported slowdown of the UK's housing market in late 2004. House prices were 11.8% higher on the year in the last quarter of 2004, down from 16.3% in the JulytoSeptember quarter, the Land Registry said. The average house price in England and Wales was £182,920, down from £187,971 in JulySeptember. The volume of sales bet…	business	survey confirms property slowdown government figures confirmed reported slowdown uk housing market late house prices quarter julytoseptember quarter land registry average house price england wales julyseptember volume sales october december dropped quarter period government figures official confirmation falls market land registry figures banks building societies record completions mortgage approv…	0	1	0	0	4	4	4	4	4	4	4	4	4	4	4	4	11	4	4
Bush budget seeks deep cutbacks President Bush has presented his 2006 budget, cutting domestic spending in a bid to lower a record deficit projected to peak at $427bn (£230bn) this year. The $2.58 trillion (£1.38 trillion) budget submitted to Congress affects 150 domestic programmes from farming to the environment, education and health. But foreign aid is due to rise by 10%, with more money to tr…	business	bush budget seeks deep cutbacks president bush budget cutting domestic spending bid lower record deficit projected peak trillion trillion budget submitted congress domestic programmes farming environment education health foreign aid rise money treat reward economic political reform military spending set rise reach budget cost running military operations iraq afghanistan administration expected se…	0	1	0	1	4	4	4	4	4	4	4	4	4	4	4	1	1	4	4
Profits stall at China's Lenovo Profits at Chinese computer firm Lenovo have stood still amid slowing demand at home and stiffening competition. The firm is in the international spotlight after last year signing a deal to buy the PC division of personal computer pioneer IBM. Lenovo's profit for the three months to December was HK$327m (US$42m; £22m), less than 1% up on the year before. Chinese PC…	business	profits stall china lenovo profits chinese computer firm lenovo stood amid slowing demand stiffening competition firm international spotlight signing deal buy pc division personal computer pioneer ibm lenovo profit months december hk chinese pc sales risen growing slowly company biggest player china quarter market western firms dell hewlettpackard mounting solid fight market share china lenovo sa…	0	1	0	0	4	4	4	4	4	0	0	0	11	11	11	11	11	11	7
MCI shares climb on takeover bid Shares in US phone company MCI have risen on speculation that it is in takeover talks. The Wall Street Journal reported on Thursday that Qwest has bid $6.3bn (£3.4bn) for MCI. Other firms have also expressed an interest in MCI, the secondlargest US longdistance phone firm, and may now table rival bids, analysts said. Shares in MCI, which changed its name from Worl…	business	mci shares climb takeover bid shares phone company mci risen speculation takeover talks wall street journal reported thursday qwest bid mci firms expressed mci secondlargest longdistance phone firm table rival bids analysts shares mci changed worldcom emerged bankruptcy press reports qwest mci reach agreement week rival bids muddy waters largest telephone company verizon held preliminary merger d…	0	0	0	0	4	0	4	4	0	0	11	11	11	11	11	11	11	11	11
BT offers equal access to rivals BT has moved to preempt a possible breakup of its business by offering to cut wholesale broadband prices and open its network to rivals. The move comes after telecom regulator Ofcom said in November that the firm must offer competitors "real equality of access to its phone lines". At the time, Ofcom offered BT the choice of change or splitting into two. Ofcom is c…	business	bt offers equal access rivals bt moved preempt breakup business offering cut wholesale broadband prices network rivals move telecom regulator ofcom november firm offer competitors real equality access phone lines time ofcom offered bt choice change splitting ofcom carrying strategic review aimed promoting competition uk telecom sector bt competitors frequently accused misusing status telecoms mon…	1	2	3	3	3	3	3	3	7	7	3	3	13	13	13	13	13	13	13
Jobs growth still slow in the US The US created fewer jobs than expected in January, but a fall in jobseekers pushed the unemployment rate to its lowest level in three years. According to Labor Department figures, US firms added only 146,000 jobs in January. The gain in nonfarm payrolls was below market expectations of 190,000 new jobs. Nevertheless it was enough to push down the unemployment rat…	business	jobs growth slow created fewer jobs expected january fall jobseekers pushed unemployment rate lowest level labor department figures firms jobs january gain nonfarm payrolls market expectations jobs push unemployment rate lowest level september job gains president bush celebrate albeit fine margin net growth jobs economy term office presided net fall jobs november presidential election president h…	0	1	0	0	4	4	4	4	4	4	4	4	4	4	4	4	11	4	4
News Corp eyes video games market News Corp, the media company controlled by Australian billionaire Rupert Murdoch, is eyeing a move into the video games market. According to the Financial Times, chief operating officer Peter Chernin said that News Corp is "kicking the tyres of pretty much all video games companies". Santa Monicabased Activison is said to be one firm on its takeover list. Video g…	business	news corp eyes video games market news corp media company controlled australian billionaire rupert murdoch eyeing move video games market financial times chief operating officer peter chernin news corp kicking tyres pretty video games companies santa monicabased activison firm takeover list video games business paper quoted chernin success products sony playstation microsoft xbox nintendo game cu…	1	2	3	3	3	3	7	7	7	7	7	7	7	7	7	7	7	7	7
Call to overhaul UK state pension The UK pension system has been branded inadequate and too complex by a leading retirement thinktank. The Pensions Policy Institute (PPI) said replacing the state pension with a "citizen's pension" would help tackle inequality and complexity. The change would see pensions being calculated on length of residency in the UK rather than National Insurance (NI) contrib…	business	call overhaul uk pension uk pension system branded inadequate complex leading retirement thinktank pensions policy institute ppi replacing pension citizen pension tackle inequality complexity change pensions calculated length residency uk national insurance ni contributions reform reduce poverty aiding people broken employment records ppi system reformed government options overhaul private workpl…	1	1	1	1	1	1	1	8	8	8	8	8	8	8	8	1	1	8	8
Singapore growth at 8.1% in 2004 Singapore's economy grew by 8.1% in 2004, its best performance since 2000, figures from the trade ministry show. The advance, the secondfastest in Asia after China, was led by growth of 13.1% in the key manufacturing sector. However, a slowerthanexpected fourth quarter points to more modest growth for the tradedriven economy in 2005 as global technology demand fal…	business	singapore growth singapore economy grew performance figures trade ministry advance secondfastest asia china led growth key manufacturing sector slowerthanexpected fourth quarter modest growth tradedriven economy global technology demand falls slowdowns china hit electronics exports tsunami disaster service sector economic growth set halve singapore fourth quarter city gross domestic product gdp r…	0	1	0	0	4	4	4	4	4	4	4	4	4	4	11	4	11	4	4
Turkey knocks six zeros off lira Turkey is to relaunch its currency on Saturday, knocking six zeros off the lira in the hope of boosting trade and powering its growing economy. The change will see the end of such dizzyinglyhigh denominations as five million lira enough for a short taxi ride and the 20m note, worth $15. These valuations were the product of decades of inflation which, as recently a…	business	turkey knocks zeros lira turkey relaunch currency saturday knocking zeros lira hope boosting trade powering growing economy change dizzyinglyhigh denominations lira short taxi ride note worth valuations product decades inflation inflation tamed economic prospects improving currency officially lira launched midnight january onemillion lira note onelira coin government hopes change promise growing …	0	1	0	1	4	4	1	1	1	1	1	1	1	1	1	1	1	4	4
S Korea spending boost to economy South Korea will boost state spending next year in an effort to create jobs and kick start its sputtering economy. It has earmarked 100 trillion won ($96bn) for the first six months of 2005, 60% of its total annual budget. The government's main problems are "slumping consumption and a contraction in the construction industry". It aims to create 400,000 jobs and w…	business	korea spending boost economy south korea boost spending effort create jobs kick start sputtering economy earmarked trillion won months total annual budget government main slumping consumption contraction construction industry aims create jobs focus infrastructure building providing public firms money hire workers government set economic growth rate target hinted danger action internal external ec…	0	1	0	0	4	4	4	4	4	4	4	4	4	4	4	4	11	4	4
Latin America sees strong growth Latin America's economy grew by 5.5% in 2004, its best performance since 1980, while exports registered their best performance in two decades. The United Nations' Economic Commission for Latin America and the Caribbean said the region grew by 5.5% this year. The InterAmerican Development Bank (IADB) said regional exports reached $445.1bn (£227bn;331bn euros) in 20…	business	latin america strong growth latin america economy grew performance exports registered performance decades united nations economic commission latin america caribbean region grew interamerican development bank iadb regional exports reached euros doubts strength recovery overheating chinese economy pose risks organisations warned oil prices raise risk inflation recession economic commission latin am…	0	1	0	0	4	4	4	4	4	4	4	4	4	4	4	4	11	4	4
Asia shares defy postquake gloom Indonesian, Indian and Hong Kong stock markets reached record highs. Investors seemed to feel that some of the worstaffected areas were so underdeveloped that the tragedy would have little impact on Asia's listed firms. "Obviously with a lot of loss of life, a lot of time is needed to clean up the mess, bury the people and find the missing," said ABN Amro's Eddie …	business	asia shares defy postquake gloom indonesian indian hong kong stock markets reached record highs investors feel worstaffected underdeveloped tragedy impact asia listed firms lot loss life lot time clean mess bury people missing abn amro eddie wong economic sense india bombay stock exchange inched previous record close wednesday expectations strong corporate earnings drove indonesian stock exchange…	0	1	0	0	4	4	6	4	4	4	4	8	8	8	11	8	11	18	18
Booming markets shed few tears The market, former British government minister Michael Heseltine once said, has no morality. And indeed, stock exchange traders around Asia have wasted little time regretting the victims of this week's disaster. Stock markets in Indonesia and India have hit alltime highs this week; even in Sri Lanka, more comprehensively affected, the main index has lost only 5% sin…	business	booming markets tears market british government minister michael heseltine morality stock exchange traders asia wasted time regretting victims week disaster stock markets indonesia india hit alltime highs week sri lanka comprehensively main lost waves hit bigger markets afield barely twitched msci share measure global stock market performance hit level week bbc global risen week time sentiment in…	0	1	0	0	4	4	4	4	4	4	4	4	11	8	11	8	11	18	4
Asian quake hits European shares Shares in Europe's leading reinsurers and travel firms have fallen as the scale of the damage wrought by tsunamis across south Asia has become apparent. More than 23,000 people have been killed following a massive underwater earthquake and many of the worst hit areas are popular tourist destinations. Reisurance firms such as Swiss Re and Munich Re lost value as in…	business	asian quake hits european shares shares europe leading reinsurers travel firms fallen scale damage wrought tsunamis south asia apparent people killed massive underwater earthquake worst hit popular tourist destinations reisurance firms swiss munich lost investors worried rebuilding costs disaster impact stock markets asia currencies including thai baht indonesian rupiah weakened analysts warned e…	0	1	0	0	4	4	4	4	4	4	4	4	11	11	11	11	11	4	11
Splitcaps pay £194m compensation Investors who lost money following the splitcapital investment trust scandal are to receive £194m compensation, the UK's financial watchdog has announced. Eighteen investment firms involved in the sale of the investments agreed the compensation package with the Financial Services Authority (FSA). Splits were marketed as a lowrisk way to benefit from rising share p…	business	splitcaps pay compensation investors lost money splitcapital investment trust scandal receive compensation uk financial watchdog announced eighteen investment firms involved sale investments agreed compensation package financial services authority fsa splits marketed lowrisk benefit rising share prices stock market collapsed products left thousands investors pocket estimated people splitcapital f…	0	1	0	0	0	0	0	0	0	0	0	0	8	0	0	0	8	8	8
French suitor holds LSE meeting European stock market Euronext has met with the London Stock Exchange (LSE) amid speculation that it may be ready to launch a cash bid. Euronext chief JeanFrancois Theodore held talks with LSE boss Clara Furse the day after rival Deutsche Boerse put forward its own bid case. The German exchange said it had held "constructive, professional and friendly" talks with t…	business	french suitor holds lse meeting european stock market euronext met london stock exchange lse amid speculation ready launch cash bid euronext chief jeanfrancois theodore held talks lse boss clara furse day rival deutsche boerse forward bid german exchange held constructive professional friendly talks lse euronext declined comment talks friday speculation mounting germans raise bid deutsche boerse …	0	0	0	0	4	4	4	0	0	0	11	0	11	11	11	11	11	18	18
Troubled Marsh under SEC scrutiny The US stock market regulator is investigating troubled insurance broker Marsh McLennan's shareholder transactions, the firm has said. The Securities and Exchange Commission has asked for information about transactions involving holders of 5% or more of the firm's shares. Marsh has said it is cooperating fully with the SEC investigation. Marsh is also the focus o…	business	troubled marsh scrutiny stock market regulator investigating troubled insurance broker marsh mclennan shareholder transactions firm securities exchange commission transactions involving holders firm shares marsh cooperating investigation marsh focus inquiry york attorneygeneral insurers rigged market inquiry launched october marsh replaced chief executive held boardroom shakeout meet criticism le…	0	1	0	0	0	0	0	0	0	0	0	0	0	11	0	11	11	18	18
Could Yukos be a blessing in disguise? Other things being equal, the notion of entrepreneurs languishing in jail while their companies are sold off for a song ought to be bad for business. But in the lookingglass world of modern Russia, the opposite might just be true, a new report* has argued. The study, from the Centre for Economic Policy Research, does not praise the rough handling of oil comp…	business	yukos blessing disguise equal notion entrepreneurs languishing jail companies sold song bad business lookingglass modern russia opposite true report argued study centre economic policy praise rough handling oil company yukos argues rigorous tax policing benefited russian firms targets tax police increase tax enforcement increase amount dividends income shareholders receive accounting increased le…	0	1	0	0	0	0	0	0	0	0	0	0	0	0	0	0	0	0	0
Nasdaq planning $100m share sale The owner of the technologydominated Nasdaq stock index plans to sell shares to the public and list itself on the market it operates. According to a registration document filed with the Securities and Exchange Commission, Nasdaq Stock Market plans to raise $100m (£52m) from the sale. Some observers see this as another step closer to a full public listing. However …	business	nasdaq planning share sale owner technologydominated nasdaq stock plans sell shares public list market operates registration document filed securities exchange commission nasdaq stock market plans raise sale observers step closer public listing nasdaq icon technology boom poured cold water suggestions company sold shares private placements technically public stock started trading otc bulletin boa…	0	1	0	0	4	0	0	0	0	0	0	0	0	0	0	0	0	0	0
Giving financial gifts to children Your child or grandchild may want the latest toy this Christmas, but how about giving them a present that will help their financial future? Gifts of the financial variety might have a longer lasting impact. It may encourage children to save or start a fund which could count towards university costs, for example. The government is trying to encourage saving at an…	business	financial gifts children child grandchild toy christmas financial future gifts financial variety lasting impact encourage children save start fund count university costs government encourage saving age child trust fund vouchers worth lowincome families distributed january children born september eligible parents decide financial institution manage gift time start scheme april parents relatives to…	1	1	0	1	1	1	1	8	8	8	8	8	1	8	8	1	1	8	6
Air China in $1bn London listing China's national airline is to make its overseas stock market debut with a dual listing in London and Hong Kong, the London Stock Exchange (LSE) has said. Air China plans to raise $1bn (£514m) from the flotation. Share trading will begin on 15 December, the LSE said. For China's aviation authorities, the listing is part of the modernisation of its airline sector t…	business	air china london listing china national airline overseas stock market debut dual listing london hong kong london stock exchange lse air china plans raise flotation share trading december lse china aviation authorities listing modernisation airline sector cope soaring demand air travel details share price shares lse hard woo chinese companies choose london york listings asiapacific office hong kon…	0	1	0	0	4	4	4	0	4	0	0	0	11	11	0	8	0	0	0
Oil prices reach threemonth low Oil prices have fallen heavily for a second day, closing at threemonth lows after news that US crude stocks have improved ahead of winter. London Brent crude closed at $40.15 on Thursday a drop of 5.1% having dived below $40 a barrel for the first time since midSeptember. US light crude traded in New York lost more than $2 to $43.25, its lowest close since 10 Septe…	business	oil prices reach threemonth low oil prices fallen heavily day closing threemonth lows news crude stocks improved ahead winter london brent crude closed thursday drop dived barrel time midseptember light crude traded york lost lowest close september price benchmark crudes dropped days falls triggered energy administration eia wednesday crude stocks ago news calmed worries winter shortages weak fue…	0	1	0	0	4	4	4	4	4	4	4	4	4	4	4	4	11	4	4
Arsenal 'may seek full share listing' Arsenal vicechairman David Dein has said the club may consider seeking a full listing for its shares on the London Stock Exchange. Speaking at the Soccerex football business forum in Dubai, he said a full listing was "one of the options" for funding after the club moves to its new stadium. The club which is currently listed on the smaller Ofex share exchange …	business	arsenal seek share listing arsenal vicechairman david dein club seeking listing shares london stock exchange speaking soccerex football business forum dubai listing options funding club moves stadium club listed ofex share exchange move emirates stadium ashburton grove start season dein warned current level tv coverage premiership reaching saturation level signs match attendances dropping months …	0	1	0	0	4	4	4	4	5	5	5	5	6	14	14	14	14	14	14
Markets signal Brazilian recovery The Brazilian stock market has risen to a record high as investors display growing confidence in the durability of the country's economic recovery. The main Bovespa index on the Sao Paolo Stock Exchange closed at 24,997 points on Friday, topping the previous record market close reached the previous day. The market's buoyancy reflects optimism about the Brazilian …	business	markets signal brazilian recovery brazilian stock market risen record investors display growing confidence durability country economic recovery main bovespa sao paolo stock exchange closed friday topping previous record market close reached previous day market buoyancy reflects optimism brazilian economy grow brazil recovering recession worst decade economic output declined president luiz inacio …	0	1	0	0	4	4	4	4	4	4	4	4	4	4	4	4	11	4	4
Markets fall on weak dollar fears Rising oil prices and the sinking dollar hit shares on Monday after a finance ministers' meeting and stern words from Fed chief Alan Greenspan. The London FTSE fell 0.8% while Tokyo's Nikkei 225 dropped 2.11%, its steepest fall in three months. G20 finance ministers said nothing about supporting the dollar, whose slide could further jeopardise growth in Japan and…	business	markets fall weak dollar fears rising oil prices sinking dollar hit shares monday finance ministers meeting stern fed chief alan greenspan london ftse fell tokyo nikkei dropped steepest fall months finance ministers supporting dollar slide jeopardise growth japan europe greenspan warned asian funding deficit monday afternoon euro close alltime dollar oil pushed monday investors fretted cold weath…	0	1	0	0	4	4	4	4	4	4	4	4	4	4	4	4	4	4	4
Google shares fall as staff sell Shares in Google have fallen 6.7% after employees and early investors in the web search took advantage of the first chance to sell their holdings. Restrictions were imposed ahead of its flotation in August, to prevent shares being dumped quickly onto the market. In one of the most closelywatched initial public offerings in stock market history, the USbased company…	business	google shares fall staff sell shares google fallen employees investors web search advantage chance sell holdings restrictions imposed ahead flotation august prevent shares dumped market closelywatched initial public offerings stock market history usbased company sold shares google shares risen fell tuesday close restriction lockup eased piecemeal additional shares free trade february selling shar…	0	1	0	0	4	4	4	0	0	0	0	4	11	11	11	11	0	11	13
Five million Germans out of work Germany's unemployment figure rose above the psychologically important level of five million last month. On Wednesday, the German Federal Labour Agency said the jobless total had reached 5.037 million in January, which takes the jobless rate to 12.1%. "Yes, we have effectively more than five million people unemployed," a government minister said earlier on ZDF pub…	business	germans germany unemployment figure rose psychologically level month wednesday german federal labour agency jobless total reached january takes jobless rate effectively people unemployed government minister earlier zdf public television unemployment germany statistics compiled partly explain jump figures embarrassing government figures worst postwar period charged politically christian jasperneit…	0	1	0	1	4	4	4	4	4	4	4	4	4	4	4	4	11	4	4
India power shares jump on debut Shares in India's largest power producer, National Thermal Power Corp (NTPC) have risen 13% on their stock market debut. The government's partial selloff of NTPC is part of a controversial programme to privatise staterun firms. The 865 million share offer, a mix of new shares and sales by the government, raised 54bn rupees($1.2bn). It was India's second $1bn stock…	business	india power shares jump debut shares india largest power producer national thermal power corp ntpc risen stock market debut government partial selloff ntpc controversial programme privatise staterun firms share offer mix shares sales government raised rupees india stock debut months coming flotation software firm tata share offer eleven times oversubscribed investment bet suhas naik investment an…	0	1	0	0	4	4	4	4	4	0	0	4	11	11	11	11	0	4	0
Turkey turns on the economic charm Three years after a gruelling economic crisis, Turkey has dressed its economy to impress. As part of a charm offensive ahead of 17 December, when the European Union will decide whether to start entry talks Turkey's economic leaders have been banging the drum to draw attention to recent achievements. The economy is growing fast, they insist. Education levels amon…	business	turkey economic charm gruelling economic crisis turkey dressed economy impress charm offensive ahead december european union decide start entry talks turkey economic leaders banging drum draw attention achievements economy growing fast insist education levels population rising unemployment levels percentage terms heading fast single digits inflation control law govern turbulent banking system car…	0	1	0	1	4	4	1	4	4	4	1	4	4	4	1	8	1	4	4
SBC plans posttakeover job cuts US phone company SBC Communications said it expects to cut around 12,800 jobs following its $16bn (£8.5bn) takeover of former parent ATT. SBC said 5,125 positions would go as a result of network efficiencies. Another 1,700 will go from its sales department, 3,400 from business operations and 2,600 across legal, advertising and public relations. SBC currently employ…	business	sbc plans posttakeover job cuts phone company sbc communications expects cut jobs takeover parent att sbc positions result network efficiencies sales department business operations legal advertising public relations sbc employs people att employs takeover announced monday deal financed shares special dividend paid att shareholders effectively marks att founded telephone pioneer alexander graham b…	0	1	0	0	4	4	4	4	0	0	11	11	11	11	11	11	11	11	11
German bidder in talks with LSE Deutsche Boerse bosses have held "constructive, professional and friendly" talks with the London Stock Exchange (LSE), its chief has said. Werner Seifert met LSE chief executive Clara Furse amid rumours the German group may raise its bid to £1.5bn ($2.9bn) from its initial £1.3bn offer. However, rival suitor Euronext also upped the ante in the bid battle. Ahead of …	business	german bidder talks lse deutsche boerse bosses held constructive professional friendly talks london stock exchange lse chief werner seifert met lse chief executive clara furse amid rumours german raise bid initial offer rival suitor euronext upped ante bid battle ahead talks lse friday paneuropean bourse prepared offer cash parisbased exchange owner liffe london reported ready raise fund bid news…	0	0	0	0	4	4	4	0	4	0	11	11	11	11	11	11	11	18	18
Amex shares up on spinoff news Shares in American Express surged more than 8% on Tuesday after it said it was to spin off its less profitable financial advisory subsidiary. The US credit card to travel services giant said offloading American Express Financial Advisors (AEFA) would boost its profitability. AEFA has more than 12,000 advisers selling financial advice, funds and insurance to 2.5 mill…	business	amex shares spinoff news shares american express surged tuesday spin profitable financial advisory subsidiary credit card travel services giant offloading american express financial advisors aefa boost profitability aefa advisers selling financial advice funds insurance customers delivered poor profits losses excellent move american express focus core businesses sell laggard division time marquis…	0	1	0	0	4	0	0	0	0	0	0	0	11	11	11	11	0	11	11
Axa Sun Life cuts bonus payments Life insurer Axa Sun Life has lowered annual bonus payouts for up to 50,000 withprofits investors. Regular annual bonus rates on former Axa Equity Law withprofits policies are to be cut from 2% to 1% for 2004. Axa blamed a poor stock market performance for the cut, adding that recent gains have not yet offset the market falls seen in 2001 and 2002. The cut will hi…	business	axa sun life cuts bonus payments life insurer axa sun life lowered annual bonus payouts withprofits investors regular annual bonus rates axa equity law withprofits policies cut axa blamed poor stock market performance cut adding gains offset market falls cut hit estimated axa policyholders rest fate march cuts axa policies policyholder invested month endowment policy final maturity payout equated…	0	1	0	0	4	4	4	4	4	4	4	4	4	4	11	11	11	4	4
Chinese dam firm 'defies Beijing' The China Three Gorges Project Corp is refusing to obey a government order to stop construction of one of its giant dams, the Chinese state press has said. The builder of the Three Gorges Dam is continuing work on the sister Xiluodu dam, said the Beijing News. The Xiluodu dam is one of 30 such largescale construction projects called to a halt because of a lack of…	business	chinese dam firm beijing china gorges project corp refusing obey government construction giant dams chinese press builder gorges dam continuing sister xiluodu dam beijing news xiluodu dam largescale construction projects called halt lack proper environmental checks beijing news company choose pay fine firm construction projects gorges underground power plant gorges project electrical power supply…	0	1	0	0	0	0	3	3	3	3	3	3	3	3	3	3	3	3	3
Stock market eyes Japan recovery Japanese shares have ended the year at their highest level since 13 July amidst hopes of an economic recovery during 2005. The Nikkei index of leading shares gained 7.6% during the year to close at 11,488.76 points. In 2005 it "will rise toward 13,000", predicted Morgan Stanley equity strategist Naoki Kamiyama. The optimism in the financial markets contrast sharpl…	business	stock market eyes japan recovery japanese shares level july amidst hopes economic recovery nikkei leading shares gained close rise predicted morgan stanley equity strategist naoki kamiyama optimism financial markets contrast sharply pessimism japanese business community earlier month quarterly tankan survey japanese manufacturers business confidence weakened time march slower economic growth risi…	0	1	0	0	4	4	4	4	4	4	4	4	4	4	4	4	11	4	4
Iraqi voters turn to economic issues Beyond the desperate security situation in Iraq lies an economy in tatters. A vicious cycle of unemployment, poor social services and poverty has been made worse by a lack of investment. So there is much hope that an elected government will break the deadlock. "First rule of law, then the economy," says Radwan Hadi, deputy managing director of Aberdeenbased oi…	business	iraqi voters economic issues desperate security situation iraq lies economy tatters vicious cycle unemployment poor social services poverty worse lack investment hope elected government break deadlock rule law economy radwan hadi deputy managing director aberdeenbased oil gas consultancy blackwatch petroleum services entered iraq hadi view government priorities shared iraqis economy secondmost do…	1	1	1	1	1	1	1	1	8	1	1	1	1	1	1	1	1	1	1
EU 'too slow' on economic reforms Most EU countries have failed to put in place policies aimed at making Europe the world's most competitive economy by the end of the decade, a report says. The study, undertaken by the European Commission, sought to assess how far the EU has moved towards meeting its economic targets. In 2000, EU leaders at a summit in Lisbon pledged the European economy would ou…	business	eu slow economic reforms eu countries failed policies aimed europe competitive economy decade report study undertaken european commission sought assess eu moved meeting economic targets eu leaders summit lisbon pledged european economy outstrip economic targets lisbon agenda commission report eu countries pace economic reform slow fulfilling lisbon ambitions difficult impossible uk finland belgiu…	0	1	0	1	4	1	4	1	4	4	4	8	8	8	8	8	1	1	4
China continues breakneck growth China's economy has expanded by a breakneck 9.5% during 2004, faster than predicted and well above 2003's 9.1%. The news may mean more limits on investment and lending as Beijing tries to take the economy off the boil. China has sucked in raw materials and energy to feed its expansion, which could have knockon effects on the rest of the world if it overheats. But …	business	china continues breakneck growth china economy expanded breakneck faster predicted news limits investment lending beijing economy boil china sucked raw materials energy feed expansion knockon effects rest overheats officials industrial growth slowed services providing impetus growth industrial output main target government efforts impose curbs credit investments previous consumer prices rose fast…	0	1	0	0	4	4	4	4	4	4	4	4	4	4	4	4	11	4	4
Japan's ageing workforce: built to last In his twenties he battled tuberculosis for eight years, then went on to run his own clothing business before marrying in his late thirties. And the 101yearold Torao Toshitsune has eaten raw fish pretty much every day throughout his life. Mr Toshitsune is one of Japan's 23,000 centenarians a club that is growing by 13% annually, and where the oldest member …	business	japan ageing workforce built twenties battled tuberculosis clothing business marrying late thirties torao toshitsune eaten raw fish pretty day life toshitsune japan centenarians club growing annually neat osaka detached house lives sexagenarian daughters toshitsune regular routine copying buddhist sutras preparing traditional japanese tea ceremony tasks remarkably active senior citizen reveals go…	0	1	0	0	4	4	4	4	4	4	4	4	4	4	4	4	11	4	4
GE sees 'excellent' world economy US behemoth General Electric has posted an 18% jump in quarterly sales, and in profits, and declared itself "in great shape". "We are benefiting from our growth initiatives and an excellent global economy," said GE's chief executive Jeff Immelt. GE is the US' biggest firm based on stock market valuation. GE's net profits were $5.37bn (£2.86bn) for the final three…	business	ge economy behemoth electric posted jump quarterly sales profits declared shape benefiting growth initiatives excellent global economy ge chief executive jeff immelt ge biggest firm based stock market valuation ge net profits final months sales businesses range jet engines nbc television channel forecast sustained growth ge shares rose news friday lower industries ge materials financial industria…	0	1	0	0	4	4	4	4	4	4	4	4	4	4	11	11	11	11	16
UK economy facing 'major risks' The UK manufacturing sector will continue to face "serious challenges" over the next two years, the British Chamber of Commerce (BCC) has said. The group's quarterly survey of companies found exports had picked up in the last three months of 2004 to their best levels in eight years. The rise came despite exchange rates being cited as a major concern. However, the B…	business	uk economy facing risks uk manufacturing sector continue challenges british chamber commerce bcc quarterly survey companies exports picked months levels rise exchange rates cited major concern bcc uk economy faced major risks warned growth set slow forecast economic growth slow manufacturers domestic sales growth fell quarter survey firms employment manufacturing fell job expectations lowest leve…	0	1	0	0	4	4	4	4	4	4	4	4	4	4	4	4	11	4	4
Bank holds interest rate at 4.75% The Bank of England has left interest rates on hold again at 4.75%, in a widelypredicted move. Rates went up five times from November 2003 as the bank sought to cool the housing market and consumer debt but have remained unchanged since August. Recent data has indicated a slowdown in manufacturing and consumer spending, as well as in mortgage approvals. And retai…	business	bank holds rate bank england left rates hold widelypredicted move rates times november bank sought cool housing market consumer debt remained unchanged august data slowdown manufacturing consumer spending mortgage approvals retail sales disappointed christmas analysts putting drop consumer confidence rising rates accompanying slowdown housing market knocked consumers optimism causing sharp fall d…	0	1	0	4	4	4	4	4	4	4	4	4	4	4	4	4	11	4	4
Tobacco giants hail court ruling US tobacco companies have welcomed an appeal court's decision to reject the government's $280bn (£155bn) claim for alleged deceit about smoking dangers. Tobacco stocks rose sharply on Wall Street after the 21 decision. The court in Washington found the case filed by the Clinton administration in 1999 could not be brought under federal antiracketeering laws. Antism…	business	tobacco giants hail court ruling tobacco companies welcomed appeal court decision reject government claim alleged deceit smoking dangers tobacco stocks rose sharply wall street decision court washington filed clinton administration brought federal antiracketeering laws antismoking urge government fight justice department appeal accused altria rj reynolds tobacco lorillard tobacco liggett brown wi…	1	1	0	0	0	0	0	0	0	0	8	0	0	0	0	0	0	18	18
Steady job growth continues in US The US created fewer jobs than expected in December, but analysts said that the dip in hiring was not enough to derail the world's biggest economy. According to Labor Department figures, 157,000 new jobs were added last month. That took 2004's total to 2.2 million, the best showing in five years. Job creation was one of last year's main concerns for the US econom…	business	steady job growth continues created fewer jobs expected december analysts dip hiring derail biggest economy labor department figures jobs month total job creation main concerns economy worries remain conditions set steady growth analysts unemployment rate stayed december jobs created month figure drop respectable report michael moran analyst daiwa securities payroll growth december lighter consen…	0	1	0	0	4	4	4	4	4	4	4	4	4	4	4	4	11	4	4
Glazer makes new Man Utd approach Malcolm Glazer has made a fresh approach to buy Manchester United, which could lead to a bid valuing the Premiership club at £800m. The US tycoon, who has been wooing the club for the last 12 months, has approached the United board with "detailed proposals", it has confirmed. Mr Glazer, who owns the Tampa Bay Buccaneers team, hopes this will lead to a formal bid …	business	glazer utd approach malcolm glazer fresh approach buy manchester united lead bid valuing premiership club tycoon wooing club months approached united board detailed proposals confirmed glazer owns tampa bay buccaneers team hopes lead formal bid accepted offer expected debt glazer takeover attempt red devils responded shareholding vote board november united bid based level borrowing newspapers spe…	0	0	0	4	4	1	1	1	0	0	0	1	11	11	1	11	1	18	18
Wall Street cheers Bush victory The US stock market has closed higher in response to George W Bush's victory in the presidential elections. The benchmark Dow Jones share index closed more than 1% higher at 10,137, while the Nasdaq rose 0.9% to 2,004. Many investors believe that Mr Bush's policies are more businessfriendly than those of his Democrat challenger, John Kerry. The higher share prices …	business	wall street cheers bush victory stock market closed response george bush victory presidential elections benchmark dow jones share closed nasdaq rose investors bush policies businessfriendly democrat challenger john kerry share prices reflect relief winner emerged proved tight poll investors worried outcome poll inconclusive paving repeat legal wrangling marred election dow lost weeks election unc…	0	1	0	1	4	4	4	4	4	4	4	4	4	4	4	4	11	4	4
Business confidence dips in Japan Business confidence among Japanese manufacturers has weakened for the first time since March 2003, the quarterly Tankan survey has found. Slower economic growth, rising oil prices, a stronger yen and weaker exports were blamed for the fall. December's confidence level was below that seen in September, the Bank of Japan said. However, September's reading was the s…	business	business confidence dips japan business confidence japanese manufacturers weakened time march quarterly tankan survey slower economic growth rising oil prices stronger yen weaker exports blamed fall december confidence level september bank japan september reading strongest economy pause fall economy minister feel bit slower growth bit gentle situation recovery continue economy minister heizo take…	0	1	0	0	4	4	4	4	4	4	4	4	4	4	4	4	11	4	4
Millions 'to lose textile jobs' Millions of the world's poorest textile trade workers will lose their jobs under new trade rules to be introduced in the new year, a charity has warned. The World Trade Organisation (WTO) is to end its MultiFibre Agreement (MFA) on midnight of 31 December. Christian Aid condemned the move, saying it would see almost a million jobs in Bangladesh alone being axed. Ho…	business	millions lose textile jobs millions poorest textile trade workers lose jobs trade rules introduced charity warned trade organisation wto multifibre agreement mfa midnight december christian aid condemned move jobs bangladesh axed supporters change claim increased efficiency lower costs western consumers jobs created india china advocates argue wto developing countries support quotas stressed fund…	0	1	0	0	4	4	4	4	8	8	8	8	8	8	8	8	8	8	4
Dutch bank to lay off 2,850 staff ABN Amro, the Netherlands' largest bank, is to cut 2,850 jobs as a result of falling profits. The cuts amounting to 3% of the bank's workforce will result in a oneoff charge of 790m euros ($1.1bn). About 1,100 jobs will go in investment banking while 1,200 and 550 will go in IT and human resources respectively. ABN Amro is the third large European bank to announc…	business	dutch bank lay staff abn amro netherlands largest bank cut jobs result falling profits cuts amounting bank workforce result oneoff charge euros jobs investment banking human resources abn amro european bank cutbacks month deutsche bank credit suisse profitability hit fall mortgage lending united bank largest single market rate rises abn amro operations netherlands united kingdom hardest hit jobs …	0	1	0	0	4	4	4	4	4	4	4	4	4	4	11	4	11	4	4
Fannie Mae 'should restate books' US mortgage company Fannie Mae should restate its earnings, a move that is likely to put a billiondollar dent in its accounts, watchdogs have said. The Securities Exchange Commission accused Fannie Mae of using techniques that "did not comply in material respects" with accounting standards. Fannie Mae last month warned that some records were incorrect. The other …	business	fannie mae restate books mortgage company fannie mae restate earnings move billiondollar dent accounts watchdogs securities exchange commission accused fannie mae techniques comply material respects accounting standards fannie mae month warned records incorrect main mortgage firm freddie mac restated earnings probe books comments increase pressure congress strengthen supervision fannie mae freddi…	0	1	0	0	4	4	4	4	4	4	0	4	4	0	4	3	4	4	3
US to rule on Yukos refuge call Yukos has said a US bankruptcy court will decide whether to block Russia's impending auction of its main production arm on Thursday. The Russian oil firm has filed for bankruptcy protection in the US in an attempt to halt the forced sale. However, Judge Letitia Clark said the hearing would continue on Thursday when arguments in the case would be heard. Russian auth…	business	rule yukos refuge call yukos bankruptcy court decide block russia impending auction main production arm thursday russian oil firm filed bankruptcy protection attempt halt forced sale judge letitia clark hearing continue thursday arguments heard russian authorities auction yuganskneftegas december pay huge tax bill yukos russian prosecutors forcing sale firm lucrative asset yuganskneftegas pay tax…	0	1	0	0	0	0	0	0	0	0	0	0	0	0	0	0	0	0	0
JJ agrees $25bn Guidant deal Pharmaceutical giant Johnson Johnson has agreed to buy medical technology firm Guidant for $25.4bn (£13bn). Guidant is a key producer of equipment that combats heart problems such as implant defibrillators and pacemakers. Analysts said that the deal is aimed at offsetting Johnson Johnson's reliance on a slowing drug business. They also pointed out that more mergers ar…	business	jj agrees guidant deal pharmaceutical giant johnson johnson agreed buy medical technology firm guidant guidant key producer equipment combats heart implant defibrillators pacemakers analysts deal aimed offsetting johnson johnson reliance slowing drug business mergers drug healthcare industries fragmented pressure cut costs johnson johnson products facing patent expirations company battling fierce…	0	1	0	0	0	0	0	0	0	0	0	0	11	11	11	11	0	11	11
Libya takes $1bn in unfrozen funds Libya has withdrawn $1bn in assets from the US, assets which had previously been frozen for almost 20 years, the Libyan central bank has said. The move came after the US lifted a trade ban to reward Tripoli for giving up weapons of mass destruction and vowing to compensate Lockerbie victims. The original size of Libya's funds was $400m, the central bank told Reu…	business	libya takes unfrozen funds libya withdrawn assets assets frozen libyan central bank move lifted trade ban reward tripoli weapons mass destruction vowing compensate lockerbie victims original size libya funds central bank told reuters withdrawal libya cut ties process accounts banks united central bank vice president farhat omar ben gadaravice frozen assets invested countries believed included equ…	0	1	0	0	4	0	4	4	4	4	4	4	4	4	4	0	0	4	4
Cactus diet deal for Phytopharm A slimming aid made from a southern African cactus is set to be developed by UK firm Phytopharm and Unilever. AngloDutch food giant Unilever will help the pharmaceutical firm develop the snacks containing Hoodia extract. Phytopharm shares jumped 10.7% on the news, with analysts saying sales of $600m (£309m) a year were possible. The plant, licensed to Phytopharm in…	business	cactus diet deal phytopharm slimming aid southern african cactus set developed uk firm phytopharm unilever anglodutch food giant unilever pharmaceutical firm develop snacks hoodia extract phytopharm shares jumped news analysts sales plant licensed phytopharm thousands sans bushmen kalahari desert stave hunger studies reportedly plant curbs appetite reducing calorific intake existing products phyt…	0	1	0	0	4	4	7	7	7	7	7	7	4	11	11	11	7	11	7
Brazil plays down Varig rescue The Brazilian government has played down claims that it could step in to save the country's biggest airline. Brazil's airport authority chief Carlos Wilson had claimed the government was on the brink of stepping in to save Varig, Brazil's flagship airline. However, the country's vice president Jose Alencar has said the government still is looking for a solution. Var…	business	brazil plays varig rescue brazilian government played claims step save country biggest airline brazil airport authority chief carlos wilson claimed government brink stepping save varig brazil flagship airline country vice president jose alencar government solution varig struggling huge debt burden estimated debt billion reais rescue cards meeting country congress airline crisis alencar replied ea…	0	1	0	0	4	4	4	4	4	4	1	1	1	1	1	1	1	8	1
Bombardier chief to leave company Shares in train and planemaking giant Bombardier have fallen to a 10year low following the departure of its chief executive and two members of the board. Paul Tellier, who was also Bombardier's president, left the company amid an ongoing restructuring. Laurent Beaudoin, part of the family that controls the Montrealbased firm, will take on the role of CEO under a …	business	bombardier chief leave company shares train planemaking giant bombardier fallen low departure chief executive board paul tellier bombardier president left company amid ongoing restructuring laurent beaudoin family controls montrealbased firm role ceo newly created management structure analysts resignations stemmed boardroom dispute tellier tenure company january plans cut worldwide workforce anno…	0	1	0	0	4	4	4	0	0	0	0	0	11	11	11	11	0	18	18
Brazil approves bankruptcy reform A major reform of Brazil's bankruptcy laws has been approved by the country's Congress, in a move which it is hoped will cut the cost of borrowing. The bill, proposed in 1993, has finally been approved by the leadership of President Luiz Inacio Lula da Silva. The old law, dating from 1945, gave priority first to workers, second to tax revenue and finally to credi…	business	brazil approves bankruptcy reform major reform brazil bankruptcy laws approved country congress move hoped cut cost borrowing bill proposed finally approved leadership president luiz inacio lula da silva law dating priority workers tax revenue finally creditors legislation priority creditors limiting payments workers regulations limit payments workers times minimum monthly salary law difficult co…	0	1	0	1	4	4	4	4	4	8	0	1	8	0	1	1	1	8	4
Retail sales show festive fervour UK retail sales were better than expected in November as Christmas shoppers began their seasonal flock to the High Street, figures show. The Office for National Statistics (ONS) said retail sales rose 0.6% on the month and 6.1% on the year. But the figures, along with this week's inflation report, could trigger another interest rate rise in the New Year. However,…	business	retail sales festive fervour uk retail sales expected november christmas shoppers seasonal flock street figures office national statistics ons retail sales rose month figures week inflation report trigger rate rise data british retail consortium slip street sales november ons data confounded analyst expectations expected sales fall november shoppers buying christmas december retailers attempts dr…	0	1	0	4	4	4	4	4	4	4	4	4	4	4	4	4	11	4	4
Cairn shares slump on oil setback Shares in Cairn Energy, a UK oil firm, have closed down 18% after a disappointing drilling update and a warning over possible tax demands. The company said tests had shown no significant finds in one of its Indian oil fields, but was upbeat about the potential of other areas. It also said the Indian government had told it to pay a production tax, for which Cairn …	business	cairn shares slump oil setback shares cairn energy uk oil firm closed disappointing drilling update warning tax demands company tests indian oil fields upbeat potential indian government told pay production tax cairn argues liable cairn shares jumped investors piled cairn company announced oil india chief executive bill gammell friday disappointed exploration socalled nc extension rajasthan inves…	0	1	0	0	0	0	0	0	0	0	0	4	0	0	0	0	0	0	0
French boss to leave EADS The French cohead of European defence and aerospace group EADS Philippe Camus is to leave his post. Mr Camus said in a statement that he has accepted the invitation to return fulltime to the Lagardere group, which owns 30% of EADS. "I will give up my role as soon as the board of directors asks me to do so," he said. Airbus head Noel Forgeard is now set to replace Mr Camu…	business	french boss leave eads french cohead european defence aerospace eads philippe camus leave post camus statement accepted invitation return fulltime lagardere owns eads role board directors airbus head noel forgeard set replace camus bringing company power struggle fighting camus forgeard hit headlines france analysts feared fighting destabilise defence aerospace french finance minister herve gayma…	0	0	0	0	0	4	1	1	1	1	1	1	11	1	1	1	1	1	18
AstraZeneca hit by drug failure Shares in AngloSwedish drug have closed down 8% in UK trade after the failure of its Iressa drug in a major clinical trial. The lung cancer drug did not significantly prolong survival in patients with the disease. This setback for the group follows the rejection by the US in October of its anticoagulant pill Exanta. Meanwhile, another of its major money spinners ch…	business	astrazeneca hit drug failure shares angloswedish drug closed uk trade failure iressa drug major clinical trial lung cancer drug prolong survival patients disease setback rejection october anticoagulant pill exanta major money spinners cholesterol drug crestor facing mounting safety concerns blockbuster drugs meant power company forward failing risks crestor nick turner analyst brokers jefferies a…	0	1	0	0	0	0	0	0	8	8	8	8	11	11	11	11	11	11	11
Strong quarterly growth for Nike Nike has reported its best secondquarter earnings, helped by strong demand for its athletic shoes and Converse sneakers. The global sports giant said it posted a profit of $261.9m (£135.6m), for the three months to 30 November, up from $179.1m in the same period last year. Revenues increased 11% to $3.1bn, from $2.8bn for the same period in 2003. Nike, whose produ…	business	strong quarterly growth nike nike reported secondquarter earnings helped strong demand athletic shoes converse sneakers global sports giant posted profit months november period revenues increased period nike products endorsed tiger woods sports stars demand continues grow strong quarter firm based beaverton oregon philip knight chairman chief executive nike secondquarter revenues earnings share r…	0	1	0	0	4	4	4	4	4	4	4	4	4	4	11	4	11	4	4
Stormy year for property insurers A string of storms, typhoons and earthquakes has made 2004 the most expensive year on record for property insurers, according to Swiss Re. The world's second biggest insurer said disasters around the globe have seen property claims reach $42bn (£21.5bn). "2004 reinforces the trend towards higher losses," said Swiss Re. Tightly packed populations in the areas invo…	business	stormy property insurers string storms typhoons earthquakes expensive record property insurers swiss biggest insurer disasters globe property claims reach reinforces trend losses swiss tightly packed populations involved natural manmade disasters partly blame rise claims insurance claims natural catastrophes rest attributed mademade events largest claims struck hurricanes japan suffered concentra…	0	1	0	0	4	4	6	4	4	4	4	4	13	11	11	11	11	18	18
Parmalat sues 45 banks over crash Parmalat has sued 45 banks as it tries to reclaim money paid to banks before the scandalhit Italian dairy company went bust last year. The firm collapsed with debts of about 14bn euros ($19bn; £10bn) and new boss Enrico Bondi has already taken legal action against a number of lenders. He claims the banks were aware of the problems but continued to work with the c…	business	parmalat sues banks crash parmalat sued banks reclaim money paid banks scandalhit italian dairy company bust firm collapsed debts euros boss enrico bondi legal action lenders claims banks aware continued company earn commissions parmalat identified banks time italian law administrators seek money paid financial institutions prior insolvency suspicion institutions company financial trouble firm pr…	0	1	0	0	0	0	0	0	0	0	0	0	0	0	0	0	0	18	18
Irish company hit by Iraqi report Shares in Irish oil company Petrel Resources have lost more than 50% of their value on a report that the firm has failed to win a contract in Iraq. Reuters news agency reported that Iraq's Oil Ministry has awarded the first postwar oilfield contracts to a Canadian and a Turkish company. By 1700 GMT, Petrel's shares fell from 97p ($1.87) to 44p ($0.85). Petrel sai…	business	irish company hit iraqi report shares irish oil company petrel resources lost report firm failed win contract iraq reuters news agency reported iraq oil ministry awarded postwar oilfield contracts canadian turkish company gmt petrel shares fell petrel received iraqi authorities confirm deny report iraq seeking award contracts projects valued turkey everasia reported reuters won contract develop k…	0	1	0	0	0	0	0	0	0	0	0	0	0	0	0	0	0	0	0
Yukos unit fetches $9bn at auction A littleknown Russian company has bought the main production unit of oil giant Yukos at auction in Moscow. Baikal Finance Group outbid favourite Gazprom, the statecontrolled gas monopoly, to buy Yuganskneftegas. Baikal paid 260.75bn roubles ($9.37bn: £4.8bn) for Yugansk nowhere near the $27bn Russia says Yukos owes in taxes. Yukos reacted immediately by repeatin…	business	yukos unit fetches auction littleknown russian company bought main production unit oil giant yukos auction moscow baikal finance outbid favourite gazprom statecontrolled gas monopoly buy yuganskneftegas baikal paid roubles yugansk russia yukos owes taxes yukos reacted repeating view auction illegal international russian law baikal bought trouble company considers victor auction bought headache yu…	0	0	0	0	0	0	0	0	0	0	0	0	0	0	0	0	0	0	0
SN extends Indian beer venture The UK's biggest brewer, Scottish and Newcastle (SN), is to buy 37.5% of India's United Breweries in a deal worth 4.66bn rupees ($106m:£54.6m). SN will buy a 17.5% equity stake in United, maker of the wellknown Kingfisher lager brand, and make a public offer to buy another 20% stake. A similar holding will be controlled by Vijay Mallya, chair of the Indian firm. The…	business	sn extends indian beer venture uk biggest brewer scottish newcastle sn buy india united breweries deal worth rupees sn buy equity stake united maker wellknown kingfisher lager brand public offer buy stake holding controlled vijay mallya chair indian firm deal natural development joint venture united tony froggatt sn chief executive top brands newcastle brown ale foster john smith strongbow kronen…	0	1	0	0	4	4	6	0	0	0	0	0	11	11	11	8	0	11	18
Euronext 'poised to make LSE bid' PanEuropean group Euronext is poised to launch a bid for the London Stock Exchange, UK media reports say. Last week, the LSE rejected a takeover proposal from German rival Deutsche Boerse the 530 penceashare offer valued the exchange at about £1.35bn. The LSE, which saw its shares rise 25%, said the bid undervalued the business. Euronext formed after the Brussels…	business	euronext lse bid paneuropean euronext poised launch bid london stock exchange uk media reports week lse rejected takeover proposal german rival deutsche boerse penceashare offer valued exchange lse shares rise bid undervalued business euronext formed brussels paris amsterdam exchanges merged reportedly investment banks offer lse europe biggest stock market key prize listing stocks total capitalis…	0	0	0	0	4	4	4	0	4	0	11	11	11	11	11	11	11	18	18
Christmas shoppers flock to tills Shops all over the UK reported strong sales on the last Saturday before Christmas with some claiming recordbreaking numbers of festive shoppers. A spokesman for Manchester's Trafford Centre said it was "the biggest Christmas to date" with sales up 5%. And the Regent Street Association said shops in central London were also expecting the "best Christmas ever". Tha…	business	christmas shoppers flock tills shops uk reported strong sales saturday christmas claiming recordbreaking festive shoppers spokesman manchester trafford centre biggest christmas sales regent street association shops central london expecting christmas picture reports disappointing festive sales couple weeks trafford centre spokeswoman vehicles arrived centre saturday gmt predict week continue trend…	0	2	0	4	4	4	4	4	4	4	11	11	4	11	11	4	11	11	11
Mystery surrounds new Yukos owner The fate of Russia's Yuganskneftegas the oil firm sold to a littleknown buyer on Sunday is the subject of frantic speculation in Moscow. Baikal Finance Group emerged as the auction winner, agreeing to pay 260.75bn roubles (£4.8bn; $9.4bn). Russia's newspapers claimed that Baikal was a front for gas monopoly Gazprom, which had been expected to win. The sale has de…	business	mystery surrounds yukos owner fate russia yuganskneftegas oil firm sold littleknown buyer sunday subject frantic speculation moscow baikal finance emerged auction winner agreeing pay roubles russia newspapers claimed baikal front gas monopoly gazprom expected win sale destroyed yukos owner yuganskneftegas founder mikhail khodorkovsky yuganskneftegas sold traditions authorities wonderful christmas…	0	0	0	0	0	0	0	0	0	0	0	0	0	0	0	0	0	0	0
Euronext joins bid battle for LSE PanEuropean stock market Euronext has approached the London Stock Exchange (LSE) about a possible takeover bid. "The approach is at an early stage and therefore does not require a response at this point," LSE said. Talks with the European stock market and with rival bidder Deutsche Boerse will continue, the LSE said. Last week, the group rejected a £1.3bn ($2.5bn…	business	euronext joins bid battle lse paneuropean stock market euronext approached london stock exchange lse takeover bid approach stage require response lse talks european stock market rival bidder deutsche boerse continue lse week rejected takeover offer deutsche boerse claiming undervalued business lse shares surge trade announcement monday offer widespread media speculation euronext offer lse experts…	0	0	0	0	4	4	4	0	4	0	11	11	11	11	11	11	11	18	18
Iraq and Afghanistan in WTO talks The World Trade Organisation (WTO) is to hold membership talks with both Iraq and Afghanistan. But Iran's bid to join the trade body has been refused after the US blocked its application for the 21st time. The countries stand to reap huge benefits from membership of the group, whose purpose is to promote free trade. Joining, however, is a lengthy process. China's…	business	iraq afghanistan wto talks trade organisation wto hold membership talks iraq afghanistan iran bid join trade body refused blocked application time countries stand reap huge benefits membership purpose promote free trade joining lengthy process china admission talks russia saudi arabia membership genevabased wto helps guarantee country receives equal treatment markets policy closely globalisation …	0	1	1	1	1	1	1	1	8	8	8	8	8	8	8	8	8	8	8
Diageo to buy US wine firm Diageo, the world's biggest spirits company, has agreed to buy Californian wine company Chalone for $260m (£134m) in an allcash deal. Although Diageo's bestknown brands include Smirnoff vodka and Guinness stout, it already has a US winemaking arm Diageo Chateau Estate Wines. Diageo said it expects to get US regulatory approval for the deal during the first quarter of 20…	business	diageo buy wine firm diageo biggest spirits company agreed buy californian wine company chalone allcash deal diageo bestknown brands smirnoff vodka guinness stout winemaking arm diageo chateau estate wines diageo expects regulatory approval deal quarter chalone integrated existing wine business wine market represents growth opportunity diageo favourable demographic consumption trends diageo north…	0	1	0	0	4	4	4	0	0	0	0	4	4	11	11	11	0	3	11
Tokyo says deflation 'controlled' The Japanese government has forecast that the country's economic growth will slow to 1.6% in the next fiscal year starting in April 2005. While it predicts this fall from the current 2.1% level, it said it was making progress on ending deflation. The figures were given by economics minister Heizo Takenaka who said the economy would grow by 2% in 2006/07. He said …	business	tokyo deflation japanese government forecast country economic growth slow fiscal starting april predicts fall current level progress deflation figures economics minister heizo takenaka economy grow consumer price cpi rise fiscal gain attempting real economic conditions overcome deflation track takenaka deflation falling consumer prices plagued japan ease bank japan regularly flooded money market …	0	1	0	0	4	4	4	4	4	4	4	4	4	4	4	4	11	4	4
No seasonal lift for house market A swathe of figures have provided further evidence of a slowdown in the UK property market. The Council of Mortgage Lenders (CML), British Bankers Association (BBA) and Building Societies Association (BSA) all said mortgage lending was slowing. CML figures showed gross lending fell by 4% in November as the number of people buying new homes fell. Elsewhere, the BB…	business	seasonal lift house market swathe figures provided evidence slowdown uk property market council mortgage lenders cml british bankers association bba building societies association bsa mortgage lending slowing cml figures gross lending fell november people buying homes fell bba underlying mortgage lending rose november compared october cml loans property purchases fell yearonyear lowest total febr…	0	1	0	0	4	4	4	4	4	4	4	4	4	4	4	4	11	4	4
Yukos seeks court action on sale Yukos will return to a US court on Wednesday to seek sanctions against Baikal Finance Group, the littleknown firm which has bought its main asset. Yukos has said it will sue Baikal and others involved in the sale of Yuganskneftegas for $20bn in damages. Yukos' US lawyers will attempt to have Baikal assets frozen after the Russian government ignored a US court orde…	business	yukos seeks court action sale yukos return court wednesday seek sanctions baikal finance littleknown firm bought main asset yukos sue baikal involved sale yuganskneftegas damages yukos lawyers attempt baikal assets frozen russian government court week blocking sale baikal background motives buying unit unclear russian newspapers claimed baikal bought yuganskneftegas production unit roubles sunday…	0	1	0	0	0	0	0	0	0	0	0	0	0	0	0	0	0	0	0
Indy buys into India paper Irish publishing group Independent News Media is buying up a 26% stake in Indian newspaper company Jagran in a deal worth 25m euros ($34.1m). Jagran publishes India's topselling daily newspaper, the Hindilanguage Dainik Jagran, which has been in circulation for 62 years. News of the deal came as the group announced that its results would meet market forecasts. The compa…	business	indy buys india paper irish publishing independent news media buying stake indian newspaper company jagran deal worth euros jagran publishes india topselling daily newspaper hindilanguage dainik jagran circulation news deal announced meet market forecasts company reported strong revenue growth major markets advertising revenues yearonyear circulation revenues expected increase yearonyear helped p…	0	1	0	0	4	4	0	4	0	0	11	11	11	11	11	11	11	11	11
Senior Fannie Mae bosses resign The two most senior executives at US mortgage giant Fannie Mae have resigned after accounting irregularities were uncovered at the company. Chief executive Franklin Raines, a former senior official in the Clinton administration, and chief financial officer Tim Howard have left the firm. Fannie Mae was criticised by financial regulators and could have to restate its…	business	senior fannie mae bosses resign senior executives mortgage giant fannie mae resigned accounting irregularities uncovered company chief executive franklin raines senior official clinton administration chief financial officer tim howard left firm fannie mae criticised financial regulators restate earnings america largest financial institution investigations exposed extensive accounting errors fanni…	0	1	0	0	4	4	4	4	4	4	0	4	4	0	4	11	4	4	18
Cannabis hopes for drug firm A prescription cannabis drug made by UK biotech firm GW Pharmaceuticals is set to be approved in Canada. The drug is used to treat the central nervous system and alleviate the symptoms of multiple sclerosis (MS). A few weeks ago, shares in GW Pharma lost a third of their value after UK regulators said they wanted more evidence about the drug's benefits. But now Canadi…	business	cannabis hopes drug firm prescription cannabis drug uk biotech firm gw pharmaceuticals set approved canada drug treat central nervous system alleviate symptoms multiple sclerosis ms weeks ago shares gw pharma lost uk regulators evidence drug benefits canadian authorities sativex drug considered approval people canada diagnosed ms people suffering condition uk patients smoke cannabis relieve sympt…	0	1	0	0	0	0	2	8	8	8	8	8	8	2	2	2	2	2	2
Bush to get 'tough' on deficit US president George W Bush has pledged to introduce a "tough" federal budget next February in a bid to halve the country's deficit in five years. The US budget and its trade deficit are both deep in the red, helping to push the dollar to lows against the euro and fuelling fears about the economy. Mr Bush indicated there would be "strict discipline" on nondefence spe…	business	bush deficit president george bush pledged introduce tough federal budget february bid halve country deficit budget trade deficit deep red helping push dollar lows euro fuelling fears economy bush strict discipline nondefence spending budget vow cut deficit reelection declarations federal budget deficit hit record months september previous submit budget fits times bush provide tool resource milit…	0	1	0	1	4	4	4	4	4	4	4	4	4	4	4	4	11	4	4
House prices drop as sales slow House prices fell further in November and property sale times lengthened as rate rises took their toll, the Royal Institute of Chartered Surveyors found. A total of 48% of chartered surveyor estate agents reported lower prices in the three months to November the highest level in 12 years. Meanwhile the number of sales dropped 32% to an average of 22 per surveyor. T…	business	house prices drop sales slow house prices fell november property sale times lengthened rate rises toll royal institute chartered surveyors total chartered surveyor estate agents reported lower prices months november level sales dropped average surveyor amount unsold properties books rose sixth month row average properties slowdown occurring market buyers power negotiate time traditionally quiet r…	0	1	0	0	4	4	4	4	4	4	4	4	4	4	4	4	11	4	4
Fresh hope after Argentine crisis Three years after Argentina was hit by a deadly economic crisis, there is fresh hope. The country's economy is set to grow about 8% this year after seeing 9% growth last year, a sharp turnaround from 2002 when output fell 11%. The unemployment rate is improving, too: It is set to slip below 13% by the end of the year, down from 20% in May 2002. True, problems rem…	business	fresh hope argentine crisis argentina hit deadly economic crisis fresh hope country economy set grow growth sharp turnaround output fell unemployment rate improving set slip true remain picture vast improvement international monetary fund imf admits argentine authorities strong performance economy thomas dawson imf director earlier month argentina remarkable recovery hideous lengthy recession cul…	0	1	0	0	4	4	4	4	4	4	4	4	4	4	4	4	11	4	4
Disney settles disclosure charges Walt Disney has settled charges from US federal regulators that it failed to disclose how family members of directors were employed by the company. The media giant was not fined by the Securities and Exchange Commission, but has agreed to refrain from any future violations of securities law. Disney failed to tell investors that between 1999 and 2001 it employed t…	business	disney settles disclosure charges walt disney settled charges federal regulators failed disclose family directors employed company media giant fined securities exchange commission agreed refrain future violations securities law disney failed investors employed adult children directors firm admitted denied wrongdoing settlement disney directors question central matter investigation reveta bowers s…	0	1	0	0	0	0	0	0	0	0	0	0	0	0	0	11	2	11	0
Putin backs state grab for Yukos Russia's president has defended the purchase of Yukos' key production unit by stateowned oil firm Rosneft, saying it followed free market principles. Vladimir Putin said it was quite within the rights of a stateowned company to ensure its interests were met. Rosneft bought 100% of Baikal Finance Group, in a move that amounts to the renationalisation of a major chu…	business	putin grab yukos russia president defended purchase yukos key production unit stateowned oil firm rosneft free market principles vladimir putin rights stateowned company ensure met rosneft bought baikal finance move amounts renationalisation major chunk russia booming oil industry rosneft control russia total crude oil output yukos share jumped moscow climbing suspended rosneft process merging ga…	0	1	0	0	0	0	0	0	0	0	0	0	0	0	0	0	0	0	0
Troubled Marsh under SEC scrutiny The US stock market regulator is investigating troubled insurance broker Marsh McLennan's shareholder transactions, the firm has said. The Securities and Exchange Commission has asked for information about transactions involving holders of 5% or more of the firm's shares. Marsh has said it is cooperating fully with the SEC investigation. Marsh is also the focus o…	business	troubled marsh scrutiny stock market regulator investigating troubled insurance broker marsh mclennan shareholder transactions firm securities exchange commission transactions involving holders firm shares marsh cooperating investigation marsh focus inquiry york attorneygeneral insurers rigged market inquiry launched october marsh replaced chief executive held boardroom shakeout meet criticism le…	0	1	0	0	0	0	0	0	0	0	0	0	0	11	0	11	11	18	18
US firm pulls out of Iraq A US company has pulled out of a major contract to rebuild Iraq's transport system after attacks on reconstruction efforts, Pentagon officials have said. Contrack International, of Arlington, Virginia, heads a coalition of firms working on a series of schemes. Its withdrawal from the $325m (£170m) contract in November is thought to be the largest cancellation to date. Co…	business	firm pulls iraq company pulled major contract rebuild iraq transport system attacks reconstruction efforts pentagon officials contrack international arlington virginia heads coalition firms series schemes withdrawal contract november largest cancellation contrack original scope envisioned executed costeffective manner firm denied reports withdrawing completely iraq joint venture including contrac…	0	1	0	0	0	0	1	8	8	8	8	8	8	8	8	8	1	18	18
Boeing secures giant Japan order Boeing is to supply Japan Airlines with up to 50 of its forthcoming 7E7 planes in a deal that could be worth as much as $6bn (£3.1bn) for the US giant. Japan Airlines has made a firm order for 30 of the aircraft, at $120m each, with the option to buy 20 more. Asia's biggest airline joins Japanese rival All Nippon as one of the first carriers to order the midsize 7…	business	boeing secures giant japan boeing supply japan airlines forthcoming planes deal worth giant japan airlines firm aircraft option buy asia biggest airline joins japanese rival nippon carriers midsize boeing supereconomical airbus week announced presale rival boeing european competitor sell forthcoming spanish carrier air europe option buy deal worth designed fuelefficient sector short range version…	0	1	0	0	0	4	7	8	4	4	8	8	11	11	11	8	7	8	7
Banker loses sexism claim A former executive at the London offices of Merrill Lynch has lost her £7.5m ($14.6m) sex discrimination case against the US investment bank. An employment tribunal dismissed Stephanie Villalba's allegations of sexual discrimination and unequal pay. But the 42yearold won her claim of unfair dismissal, resulting from her sacking in August 2003. Her partial victory is like…	business	banker loses sexism claim executive london offices merrill lynch lost sex discrimination investment bank employment tribunal dismissed stephanie villalba allegations sexual discrimination unequal pay won claim unfair dismissal sacking august partial victory cap compensation tiny fraction extent damages assessed action biggest claim heard employment tribunal uk viewed test tribunal decided ms vill…	0	1	0	0	0	0	0	0	0	8	8	4	11	11	4	11	4	18	18
Building giant in asbestos payout Australian building products group James Hardie has agreed to pay $1.1bn (£568m) to victims of asbestosrelated diseases. The landmark deal could see thousands of people suffering from lung diseases caused by asbestos the company once made receive compensation. The move follows angry protests after the firm said a previous compensation fund was running out of mone…	business	building giant asbestos payout australian building products james hardie agreed pay victims asbestosrelated diseases landmark deal thousands people suffering lung diseases caused asbestos company receive compensation move angry protests firm previous compensation fund running money subsequent south wales inquiry criticised hardie actions september inquiry company misled public amount money set co…	0	1	0	0	0	0	0	0	0	0	0	0	11	0	11	0	0	11	11
Police detain Chinese milk bosses Chinese police have detained three top executives at milk firm Yili, with reports suggesting that they are being investigated for embezzlement. Yili full name Inner Mongolia Yili Industrial confirmed its chairman, chief financial officer and securities representative were all in custody. The company, China's thirdlargest milk producer, is to hold an emergency mee…	business	police detain chinese milk bosses chinese police detained top executives milk firm yili reports suggesting investigated embezzlement yili mongolia yili industrial confirmed chairman chief financial officer securities representative custody company china thirdlargest milk producer hold emergency meeting debate issue yili spokesman move oust chairman zheng junhuai spokesman detained police official…	0	1	0	0	0	0	4	0	0	0	0	0	0	0	8	11	0	18	18
India's Deccan seals $1.8bn deal Air Deccan has ordered 30 Airbus A320 planes in a $1.8bn (£931m) deal as India's first lowcost airline expands in the fastgrowing domestic market. Air Deccan was set up last year and wants to lure travellers away from the railway network and pricier rivals. The potential of the Indian market has attracted attention at home and abroad. Beer magnate Vijay Mallya rec…	business	india deccan seals deal air deccan airbus planes deal india lowcost airline expands fastgrowing domestic market air deccan set lure travellers railway network pricier rivals potential indian market attracted attention abroad beer magnate vijay mallya set kingfisher airlines uk entrepreneur richard branson keen start local operation country population billion people observers feel underserved airl…	0	1	0	0	4	4	6	8	4	0	8	8	11	11	8	8	11	8	11
Venezuela and China sign oil deal Venezuelan president Hugo Chavez has offered China wideranging access to the country's oil reserves. The offer, made as part of a trade deal between the two countries, will allow China to operate oil fields in Venezuela and invest in new refineries. Venezuela has also offered to supply 120,000 barrels of fuel oil a month to China. Venezuela the world's fifth larg…	business	venezuela china sign oil deal venezuelan president hugo chavez offered china wideranging access country oil reserves offer trade deal countries china operate oil fields venezuela invest refineries venezuela offered supply barrels fuel oil month china venezuela largest oil exporter sells output united chavez administration strained relationship diversify sales reduce dependence largest export mark…	0	1	0	0	4	4	4	4	4	0	0	0	0	0	0	4	0	4	0
Jarvis sells Tube stake to Spain Shares in engineering group Jarvis have soared more than 16% on news that it is offloading its stake in London underground consortium Tube Lines. The sale of the 33% stake to Spain's Ferrovial for £146m ($281m) is a lifeline to Jarvis, which was weighed down by debts of more than £230m. The company recently warned it could go under if it did not secure a refinanci…	business	jarvis sells tube stake spain shares engineering jarvis soared news offloading stake london underground consortium tube lines sale stake spain ferrovial lifeline jarvis weighed debts company warned secure refinancing deal midjanuary banks agreed extend credit facilities march company agreed terms completion biggest construction projects government private finance initiative pfi jarvis scale divis…	0	1	0	0	4	4	0	0	0	0	0	0	11	11	11	0	0	11	11
Honda wins China copyright ruling Japan's Honda has won a copyright case in Beijing, further evidence that China is taking a tougher line on protecting intellectual property rights. A court ruled that Chongqing Lifan Industry Group must stop selling Honda brand motorbikes and said it must pay 1.47m yuan ($177,600) in compensation. Internationally recognized regulation is now a key part of China's…	business	honda wins china copyright ruling japan honda won copyright beijing evidence china tougher protecting intellectual property rights court ruled chongqing lifan industry selling honda brand motorbikes pay yuan compensation internationally recognized regulation key china plans developing economy analysts beijing threatened sanctions fails clamp chinese firms copy products ranging computer software s…	0	1	0	0	0	0	0	4	4	0	0	8	8	8	8	8	8	8	8
Air Jamaica back in state control The Jamaican government is regaining control of Air Jamaica in an bid to help the ailing company out of its financial difficulties. The firm has failed to make money since the state sold a majority stake to hotel tycoon Gordon Stewart in 1994. In common with many carriers, Air Jamaica, with debts of $560m (£291m), has been hit by high fuel costs and the impact of…	business	air jamaica control jamaican government regaining control air jamaica bid ailing company financial difficulties firm failed money sold majority stake hotel tycoon gordon stewart common carriers air jamaica debts hit fuel costs impact september attacks company restructured aim finding buyer administration committed viable national airline serve major catalyst economy finance minister omar davies a…	0	1	0	0	0	0	6	0	0	0	0	8	11	11	1	1	0	8	11
Battered dollar hits another low The dollar has fallen to a new record low against the euro after data fuelled fresh concerns about the US economy. The greenback hit $1.3516 in thin New York trade, before rallying to $1.3509. The dollar has weakened sharply since September when it traded about $1.20, amid continuing worries over the levels of the US trade and budget deficits. Meanwhile, France's …	business	battered dollar hits low dollar fallen record low euro data fuelled fresh concerns economy greenback hit thin york trade rallying dollar weakened sharply september traded amid continuing worries levels trade budget deficits france finance minister faced economic catastrophe europe asia currency controls herve gaymard seek action issue meeting countries february ministers european asian government…	0	1	0	0	4	4	4	4	4	4	4	4	4	4	4	4	11	4	4
Quake's economic costs emerging Asian governments and international agencies are reeling at the potential economic devastation left by the Asian tsunami and floods. World Bank president James Wolfensohn has said his agency is "only beginning to grasp the magnitude of the disaster" and its economic impact. The tragedy has left at least 25,000 people dead, with Sri Lanka, Thailand, India and Indone…	business	quake economic costs emerging asian governments international agencies reeling potential economic devastation left asian tsunami floods bank president james wolfensohn agency grasp magnitude disaster economic impact tragedy left people dead sri lanka thailand india indonesia worst hit estimates reconstruction costs starting emerge millions left homeless businesses infrastructure washed economists…	0	1	0	0	4	4	6	4	4	4	8	8	8	8	11	8	11	18	4
Disaster claims 'less than $10bn' Insurers have sought to calm fears that they face huge losses after an earthquake and giant waves killed at least 38,000 people in southern Asia. Munich Re and Swiss Re, the world's two biggest reinsurers, have said exposure will be less than for other disasters. Rebuilding costs are likely to be cheaper than in developed countries, and many of those affected wil…	business	disaster claims insurers sought calm fears huge losses earthquake giant waves killed people southern asia munich swiss biggest reinsurers exposure disasters rebuilding costs cheaper developed countries insurance analysts swiss total claims swiss believes cost substantial doubledigit billions financial times reported munich largest reinsurance company exposure euros countries sri lanka indonesia i…	0	1	0	0	4	4	6	4	4	4	8	8	11	11	11	8	11	18	18
IndiaPakistan peace boosts trade Calmer relations between India and Pakistan are paying economic dividends, with new figures showing bilateral trade up threefold in the summer. The value of trade in AprilJuly rose to $186.3m (£97m) from $64.4m in the same period in 2003, the Indian Government said. Nonethless, the figures represent less than 1% of India's overall exports. But business is expected…	business	indiapakistan peace boosts trade calmer relations india pakistan paying economic dividends figures bilateral trade threefold summer trade apriljuly rose period indian government nonethless figures represent india exports business expected boosted south asian free trade agreement starts countries eased travel restrictions peace process aimed decades hostilities sugar plastics pharmaceutical produc…	0	1	0	0	4	4	4	4	4	4	4	4	4	4	4	4	11	4	4
US to probe airline travel chaos The US government is to investigate two airlines US Airways and Delta Air Lines' Comair subsidiary after travel chaos over the Christmas weekend. Staff calling in sick at US Airways and computer failures at Comair left 30,000 passengers stranded and 10,000 pieces of baggage undelivered. US Airways is in Chapter 11 bankruptcy protection for the second time in two y…	business	probe airline travel chaos government investigate airlines airways delta air lines comair subsidiary travel chaos christmas weekend staff calling sick airways computer failures comair left passengers stranded pieces baggage undelivered airways chapter bankruptcy protection time battling cut costs negotiate pay cuts flight baggage staff transportation secretary norman mineta deeply concerned disru…	0	1	0	0	0	4	4	8	8	8	8	8	8	8	8	8	8	8	8
S Korean lender faces liquidation Creditors of South Korea's top credit card firm have said they will put the company into liquidation if its exparent firm fails to back a bailout. LG Card's creditors have given LG group until Wednesday to sign up to a $1.1bn rescue package. The firm avoided bankruptcy thanks to a $4.5bn bailout in January 2004, which gave control to the creditors. LG Group has s…	business	korean lender liquidation creditors south korea top credit card firm company liquidation exparent firm fails bailout lg card creditors lg wednesday sign rescue package firm avoided bankruptcy bailout january control creditors lg package reflect firm ownership accept unfair burden people south korea lg card plastic purchases lg card creditors threatened parent lg penalties fails respond demands cr…	0	1	0	0	4	4	4	0	4	0	11	11	11	11	11	11	11	11	11
Dollar hits new low versus euro The US dollar has continued its recordbreaking slide and has tumbled to a new low against the euro. Investors are betting that the European Central Bank (ECB) will not do anything to weaken the euro, while the US is thought to favour a declining dollar. The US is struggling with a ballooning trade deficit and analysts said one of the easiest ways to fund it was by …	business	dollar hits low versus euro dollar continued recordbreaking slide tumbled low euro investors betting european central bank ecb weaken euro favour declining dollar struggling ballooning trade deficit analysts easiest fund allowing depreciation dollar predicted dollar fall currency trading euro gmt monday compares euro late trading york friday record low dollar weakened sharply september traded eur…	0	1	0	0	4	4	4	4	4	4	4	4	4	4	4	4	11	4	4
Mild winter drives US oil down 6% US oil prices have fallen by 6%, driven down by forecasts of a mild winter in the densely populated northeast. Light crude oil futures fell $2.86 to $41.32 a barrel on the New York Mercantile Exchange (Nymex), and have now lost $4 in five days. Nonetheless, US crude is still 30% more expensive than at the beginning of 2004, boosted by growing demand and bottlenec…	business	mild winter drives oil oil prices fallen driven forecasts mild winter densely populated northeast light crude oil futures fell barrel york mercantile exchange nymex lost days crude expensive boosted growing demand bottlenecks refineries traders effects asia tidal waves global supplies focus consumption heavily influenced short term weather revised milder temperatures inclined push lower test rang…	0	1	0	0	4	4	4	4	4	4	4	4	4	4	4	4	11	4	4
Share boost for feudhit Reliance The board of Indian conglomerate Reliance has agreed a share buyback, to counter the effects of a power struggle in the controlling family. The buyback is a victory for chairman Mukesh Ambani, whose idea it was. His brother Anil, the vicechairman, said had not been consulted and that the buyback was "completely inappropriate and unnecessary". The board hopes the m…	business	share boost feudhit reliance board indian conglomerate reliance agreed share buyback counter effects power struggle controlling family buyback victory chairman mukesh ambani idea brother anil vicechairman consulted buyback completely inappropriate unnecessary board hopes move reverse fall reliance shares feud public month company fractious founder dhirubhai ambani died leaving round mukesh doubt …	0	1	0	0	4	4	7	7	7	0	7	7	7	7	13	7	17	17	16
Giant waves damage S Asia economy Governments, aid agencies, insurers and travel firms are among those counting the cost of the massive earthquake and waves that hammered southern Asia. The worsthit areas are Sri Lanka, India, Indonesia and Thailand, with at least 23,000 people killed. Early estimates from the World Bank put the amount of aid needed at about $5bn (£2.6bn), similar to the cash off…	business	giant waves damage asia economy governments aid agencies insurers travel firms counting cost massive earthquake waves hammered southern asia worsthit sri lanka india indonesia thailand people killed estimates bank amount aid cash offered central america hurricane mitch mitch killed people caused damage bank spokesman damien milverton told wall street journal expected aid package financing debt re…	0	1	0	0	4	6	6	8	8	8	8	8	8	8	8	8	8	18	4
Asia shares defy postquake gloom Thailand has become the first of the 10 southern Asian nations battered by giant waves at the weekend to cut its economic forecast. Thailand's economy is now expected to grow by 5.7% in 2005, rather than 6% as forecast before tsunamis hit six tourist provinces. The full economic costs of the disaster remain unclear. In part, this is because of its scale, and becau…	business	asia shares defy postquake gloom thailand southern asian nations battered giant waves weekend cut economic forecast thailand economy expected grow forecast tsunamis hit tourist provinces economic costs disaster remain unclear scale delivering aid recovering dead remain priorities indonesian indian hong kong stock markets reached record highs wednesday suggesting investors fear major economic impa…	0	1	0	0	4	4	4	4	4	4	4	8	11	8	11	8	11	18	18
Israeli economy picking up pace Israel's economy is forecast to grow by 4.2% in 2004 as it continues to emerge from a threeyear recession. The main driver of the fasterthanexpected expansion has been exports, with tourism seeing a strong rebound, the statistical office said. The economy is benefiting from a quieter period in PalestinianIsraeli violence and a pickup in global demand for technology…	business	israeli economy picking pace israel economy forecast grow continues emerge threeyear recession main driver fasterthanexpected expansion exports tourism strong rebound statistical office economy benefiting quieter period palestinianisraeli violence pickup global demand technology products outlook analysts companies focused cost cutting efficiency government trim public spending push reforms growth…	0	1	0	0	4	4	4	4	4	4	4	4	4	4	4	4	11	4	4
S Korea spending boost to economy South Korea will boost state spending next year in an effort to create jobs and kick start its sputtering economy. It has earmarked 100 trillion won ($96bn) for the first six months of 2005, 60% of its total annual budget. The government's main problems are "slumping consumption and a contraction in the construction industry". It aims to create 400,000 jobs and w…	business	korea spending boost economy south korea boost spending effort create jobs kick start sputtering economy earmarked trillion won months total annual budget government main slumping consumption contraction construction industry aims create jobs focus infrastructure building providing public firms money hire workers government set economic growth rate target hinted danger action internal external ec…	0	1	0	0	4	4	4	4	4	4	4	4	4	4	4	4	11	4	4
Soros group warns of Kazakh close The Open Society Institute (OSI), financed by billionaire George Soros, has accused Kazakhstan officials of trying to close down its local office. A demand for unpaid taxes and fines of $600,000 (£425,000) is politically motivated, the OSI claimed, adding that it paid the money in October. The organisation has found itself in trouble after being accused of helpin…	business	soros warns kazakh close society institute osi financed billionaire george soros accused kazakhstan officials close local office demand unpaid taxes fines politically motivated osi claimed adding paid money october organisation trouble accused helping topple georgia president denies role offices close region osi shut office moscow withdrawn uzbekistan belarus ukraine earlier soros bank england wo…	1	1	1	0	0	0	0	0	0	0	8	0	13	0	0	0	0	8	8
Deutsche attacks Yukos case German investment bank Deutsche Bank has challenged the right of Yukos to claim bankruptcy protection in the US. In a court filing on Tuesday, it said the Russian oil giant has few Texas ties beyond bank accounts and a Texasbased finance chief. Deutsche Bank claimed Yukos had artificially manufactured a legal case to stop the sale of its main asset. It had wanted to he…	business	deutsche attacks yukos german investment bank deutsche bank challenged yukos claim bankruptcy protection court filing tuesday russian oil giant texas ties bank accounts texasbased finance chief deutsche bank claimed yukos artificially manufactured legal sale main asset fund gazprom plans bid yukos unit yuganskneftegas deutsche bank earned fees deal carried chapter bankruptcy rules kremlin auction…	0	0	0	0	0	0	0	0	0	0	0	0	0	0	0	0	0	0	0
GM in crunch talks on Fiat future Fiat will meet car giant General Motors (GM) on Tuesday in an attempt to reach agreement over the future of the Italian firm's lossmaking auto group. Fiat claims that GM is legally obliged to buy the 90% of the car unit it does not already own; GM says the contract, signed in 2000, is no longer valid. Press reports have speculated that Fiat may be willing to acce…	business	gm crunch talks fiat future fiat meet car giant motors gm tuesday attempt reach agreement future italian firm lossmaking auto fiat claims gm legally obliged buy car unit gm contract signed valid press reports speculated fiat accept cash payment return dropping claim companies cut costs car industry adjusts waning demand meeting fiat boss sergio marchionne gm rick wagoner gmt zurich reuters news a…	0	0	0	0	0	0	0	0	0	0	0	0	0	0	0	8	0	0	0
Record year for Chilean copper Chile's copper industry has registered record earnings of $14.2bn in 2004, the governmental Chilean Copper Commission (Cochilco) has reported. Strong demand from China's fastgrowing economy and high prices have fuelled production, said Cochilco vice president Patricio Cartagena. He added that the boom has allowed the government to collect $950m in taxes. Mr Cartagen…	business	record chilean copper chile copper industry registered record earnings governmental chilean copper commission cochilco reported strong demand china fastgrowing economy prices fuelled production cochilco vice president patricio cartagena boom allowed government collect taxes cartagena industry expects investment worth investments continue principle actor mining copper consolidation industry projec…	0	1	0	0	4	4	4	0	0	0	0	0	0	0	0	0	0	0	0
US consumer confidence up Consumers' confidence in the state of the US economy is at its highest for five months and they are optimistic about 2005, an influential survey says. The feelgood factor among US consumers rose in December for the first time since July according to new data. The Conference Board survey of 5,000 households pointed to renewed optimism about job creation and economic growt…	business	consumer confidence consumers confidence economy months optimistic influential survey feelgood factor consumers rose december time july data conference board survey households renewed optimism job creation economic growth retailers reported strong sales days slow start crucial festive season figures released tuesday sales shopping malls week december minute rush walmart largest retailer december …	0	1	0	0	4	4	4	4	4	4	4	4	4	4	4	4	11	4	4
Cash gives way to flexible friend Spending on credit and debit cards has overtaken cash spending in the UK for the first time. The moment that plastic finally toppled cash happened at 10.38am on Wednesday, according to the Association for Payment Clearing Services (Apacs) Apacs chose school teacher Helen Carroll, from Portsmouth, to make the historic transaction. The switch over took place as she…	business	cash flexible friend spending credit debit cards overtaken cash spending uk time moment plastic finally toppled cash happened wednesday association payment clearing services apacs apacs chose school teacher helen carroll portsmouth historic transaction switch paid groceries supermarket chain tesco cromwell road branch carroll born plastic cards appeared uk pay debit card occasional purchases cred…	1	1	0	3	4	1	3	8	8	8	11	11	13	13	11	13	13	13	13
Goahead for Balkan oil pipeline Albania, Bulgaria and Macedonia has given the go ahead for the construction of a $1.2bn oil pipeline that will pass through the Balkan peninsula. The project aims to allow alternative ports for the shipping of Russian and Caspian oil, that normally goes through Turkish ports. It aims to transport 750,000 daily barrels of oil. The pipeline will be built by the USreg…	business	goahead balkan oil pipeline albania bulgaria macedonia ahead construction oil pipeline pass balkan peninsula project aims alternative ports shipping russian caspian oil turkish ports aims transport daily barrels oil pipeline built usregistered albanian macedonian bulgarian oil corporation ambo pipeline bulgarian port burgas black sea albanian city vlore adriatic coast crossing macedonia project c…	0	1	0	0	0	0	0	0	0	0	0	0	0	0	0	0	0	0	0
Durex maker SSL awaits firm bid UK condom maker SSL International has refused to comment on reports it may be subject to a takeover early in 2005. A Financial Times report said business intelligence firm GPW was understood to be starting due diligence work on SSL International, for a corporate client. An spokesman for SSL, which makes the famous Durex brand of condom, would not to comment on "mar…	business	durex maker ssl awaits firm bid uk condom maker ssl international refused comment reports subject takeover financial times report business intelligence firm gpw understood starting diligence ssl international corporate client spokesman ssl famous durex brand condom comment market speculation news shares ssl scholl footwear pence ft highprofile firm woo ssl anglodutch household products reckitt be…	0	0	0	0	0	0	0	0	0	0	0	0	11	11	11	11	0	11	11
Nasdaq planning $100mshare sale The owner of the technologydominated Nasdaq stock index plans to sell shares to the public and list itself on the market it operates. According to a registration document filed with the Securities and Exchange Commission, Nasdaq Stock Market plans to raise $100m (£52m) from the sale. Some observers see this as another step closer to a full public listing. However N…	business	nasdaq planning sale owner technologydominated nasdaq stock plans sell shares public list market operates registration document filed securities exchange commission nasdaq stock market plans raise sale observers step closer public listing nasdaq icon technology boom poured cold water suggestions company sold shares private placements technically public stock started trading otc bulletin board lis…	0	1	0	0	4	0	0	0	0	0	0	0	0	0	0	0	0	0	0
WMC says Xstrata bid is too low Australian mining firm WMC Resources has said it is worth up to 30% more than a hostile 7.4bn Australian dollar ($5.8bn; £3bn) bid by rival Xstrata. There is now pressure on Swissbased Xstrata to increase its takeover offer. A report from investment firm Grant Samuel in WMC defence documents values WMC shares at A$7.17 to A$8.24, against Xstrata's bid of A$6.35 a s…	business	wmc xstrata bid low australian mining firm wmc resources worth hostile australian dollar bid rival xstrata pressure swissbased xstrata increase takeover offer report investment firm grant samuel wmc defence documents values wmc shares xstrata bid share analysts defence documents provided details wmc trigger rival bid bid emerge weeks daiwa securities analyst mark pervan valuation increased pressu…	0	1	0	0	0	4	4	0	0	0	0	0	11	11	11	11	0	3	3
Takeover offer for Sunderland FC Bob Murray, chairman of Sunderland FC, has launched a £1.5m ($2.8m) bid for the club after buying broadcaster BSkyB's stake in the business. Mr Murray is already Sunderland's leading shareholder, holding a 37.6% stake, and now hopes to take full control of the Championship side. Mr Murray said the club would find it easier to attract more investment by having a si…	business	takeover offer sunderland fc bob murray chairman sunderland fc launched bid club buying broadcaster bskyb stake business murray sunderland leading shareholder holding stake hopes control championship murray club easier attract investment single majority owner sunderland delisted shares stock market august lifetime sunderland supporter board director murray agreed buy bskyb holding wearside club t…	0	0	0	0	4	4	0	0	0	0	0	0	11	11	11	11	0	11	18
Warning over US pensions deficit Taxpayers may have to bail out the US agency that protects workers' pension funds, leading economists have warned. With the Pension Benefit Guaranty Corporation (PBGC) some £23bn (£12m) in deficit, the Financial Economists Roundtable (FER) wants Congress to act. Instead of taxpayers having to pick up the bill, the FER wants Congressmen to change the PBGC's funding…	business	warning pensions deficit taxpayers bail agency protects workers pension funds leading economists warned pension benefit guaranty corporation pbgc deficit financial economists roundtable fer congress taxpayers pick bill fer congressmen change pbgc funding rules fer firms allowed reduce insurance premiums pay pbgc fund fer blames law statement signed nobel economics laureate william sharpe dismayed…	1	1	0	1	0	0	1	8	8	8	8	8	8	8	8	8	8	8	8
Beer giant swallows Russian firm Brewing giant Inbev has agreed to buy AlfaEco's stake in Sun Interbrew, Russia's secondlargest brewer, for up to 259.7m euros ($353.3m; £183.75m). AlfaEco, the venture capital arm of Russian conglomerate Alfa Group, has a onefifth stake in Sun Interbrew. The deal gives Inbev, the world's biggest beermaker, neartotal control over the Russian brewer. Inbev bought ou…	business	beer giant swallows russian firm brewing giant inbev agreed buy alfaeco stake sun interbrew russia secondlargest brewer euros alfaeco venture capital arm russian conglomerate alfa onefifth stake sun interbrew deal inbev biggest beermaker neartotal control russian brewer inbev bought partner august inbev brands bass stella artois hoegaarden staropramen employs people running operations countries a…	0	0	0	0	0	0	0	0	0	0	0	0	11	0	5	0	0	11	15
US manufacturing expands US industrial production increased in December, according to the latest survey from the Institute for Supply Management (ISM). Its index of national manufacturing activity rose to 58.6 last month from 57.8 in November. A reading above 50 indicates a level of growth. The result for December was slightly better than analysts' expectations and the 19th consecutive expansion.…	business	manufacturing expands industrial production increased december survey institute supply management ism national manufacturing activity rose month november reading level growth result december analysts expectations consecutive expansion ism growth driven rise completes strong manufacturing based ism data chairman ism survey committee continuing upward pressure prices rate increase slowing trending …	0	1	0	0	4	4	4	4	4	4	4	4	4	4	4	4	11	4	4
Singapore growth at 8.1% in 2004 Singapore's economy grew by 8.1% in 2004, its best performance since 2000, figures from the trade ministry show. The advance, the secondfastest in Asia after China, was led by growth of 13.1% in the key manufacturing sector. However, a slowerthanexpected fourth quarter points to more modest growth for the tradedriven economy in 2005 as global technology demand fal…	business	singapore growth singapore economy grew performance figures trade ministry advance secondfastest asia china led growth key manufacturing sector slowerthanexpected fourth quarter modest growth tradedriven economy global technology demand falls slowdowns china hit electronics exports tsunami disaster service sector economic growth set halve singapore fourth quarter city gross domestic product gdp r…	0	1	0	0	4	4	4	4	4	4	4	4	4	4	11	4	11	4	4
Madagascar completes currency switch Madagascar has completed the replacement of its Malagasy franc with a new currency, the ariary. From Monday, all prices and contracts will have to be quoted in the ariary, which was trading at 1,893 to the US dollar. The Malagasy franc, which lost almost half its value in 2004, is no longer legal tender but will remain exchangeable at banks until 2009. The pha…	business	madagascar completes currency switch madagascar completed replacement malagasy franc currency ariary monday prices contracts quoted ariary trading dollar malagasy franc lost half legal tender remain exchangeable banks phasing franc begun july intended distance country french colonial rule address amount counterfeit francs circulation question sovereignty reuters quoted central bank official symbo…	0	1	0	0	4	4	4	4	4	4	4	4	4	4	11	4	11	4	4
Quiksilver moves for Rossignol Shares of Skis Rossignol, the world's largest skimaker, have jumped as much as 15% on speculation that it will be bought by US surfwear firm Quiksilver. The owners of Rossignol, the BoixVives family, are said to be considering an offer from Quiksilver. Analysts believe other sporting goods companies may now take a closer look at Rossignol, prompting an auction and p…	business	quiksilver moves rossignol shares skis rossignol largest skimaker jumped speculation bought surfwear firm quiksilver owners rossignol boixvives family offer quiksilver analysts sporting companies closer rossignol prompting auction pushing sale price nike mentioned suitors rossignol shares touched euros falling trade euros european sporting companies foreign revenues squeezed slump dollar takeover…	0	1	0	0	4	4	4	4	4	0	0	11	11	11	11	11	0	11	11
Dollar hovers around record lows The US dollar hovered close to record lows against the euro on Friday as concern grows about the size of the US budget deficit. Analysts predict that the dollar will remain weak in 2005 as investors worry about the state of the US economy. The Bush administration's apparent unwillingness to intervene to support the dollar has caused further concern. However, tradi…	business	dollar hovers record lows dollar hovered close record lows euro friday concern grows size budget deficit analysts predict dollar remain weak investors worry economy bush administration apparent unwillingness intervene support dollar caused concern trading volatile week technical automated trading light demand amplified reactions news analysts adding expect markets jumpy january dollar trading ver…	0	1	0	0	4	4	4	4	4	4	4	4	4	4	4	4	11	4	4
S Korean credit card firm rescued South Korea's largest credit card firm has averted liquidation following a one trillion won ($960m; £499m) bailout. LG Card had been threatened with collapse because of its huge debts but the firm's creditors and its former parent have stepped in to rescue it. A consortium of creditors and LG Group, a family owned conglomerate, have each put up $480m to stabilise…	business	korean credit card firm rescued south korea largest credit card firm averted liquidation trillion won bailout lg card threatened collapse huge debts firm creditors parent stepped rescue consortium creditors lg family owned conglomerate stabilise firm lg card customers collapse shockwaves country economy firm creditors lg card agree deal secure future weeks control company january avoided bankrupt…	0	1	0	0	4	4	4	0	4	0	0	11	11	11	11	11	11	11	11
Dollar slides ahead of New Year The US dollar has hit a new record low against the euro and analysts predict that more declines are likely in 2005. Disappointing economic reports dented the currency, which had been rallying after European policy makers said they were worried about the euro's strength. Earlier on Thursday, the Japanese yen touched its lowest versus the euro on concerns about econo…	business	dollar slides ahead dollar hit record low euro analysts predict declines disappointing economic reports dented currency rallying european policy makers worried euro strength earlier thursday japanese yen touched lowest versus euro concerns economic growth asia currency markets volatile week technical automated trading light demand amplified reactions analysts adding expect markets jumpy january p…	0	1	0	0	4	4	4	4	4	4	4	4	4	4	4	4	11	4	4
VW considers opening Indian plant Volkswagen is considering building a car factory in India, but said it had yet to make a final decision. The German giant said it was studying the possibility of opening an assembly plant in the country, but that it remained only a "potential" idea. Its comments came after the industry minister of India's Andhra Pradesh state said a team of VW officials were due …	business	vw considers indian plant volkswagen building car factory india final decision german giant studying possibility assembly plant country remained potential idea comments industry minister india andhra pradesh team vw officials visit plans satyanarayana expected vw cosign memorandum agreement foreign carmakers including hyundai toyota suzuki ford indian production facilities meet demand automobiles…	0	1	0	0	4	4	4	4	4	4	4	4	4	4	8	8	8	4	4
Ukraine strikes Turkmen gas deal Ukraine has agreed to pay 30% more for natural gas supplied by Turkmenistan. The deal was sealed three days after Turkmenistan cut off gas supplies in a price dispute that threatened the Ukrainian economy. Supplies from Turkmenistan account for 45% of all natural gas imported by Ukraine, which has large coal deposits but no gas fields. Turkmenistan is also trying …	business	ukraine strikes turkmen gas deal ukraine agreed pay natural gas supplied turkmenistan deal sealed days turkmenistan cut gas supplies price dispute threatened ukrainian economy supplies turkmenistan account natural gas imported ukraine coal deposits gas fields turkmenistan strike deal russia dependent gas turkmen president saparmurat niyazov signed contract turkmen agreed lower price demanded cubi…	0	1	0	0	0	0	0	0	0	0	0	0	0	0	0	0	0	0	0
Reliance unit loses Anil Ambani Anil Ambani, the younger of the two brothers in charge of India's largest private company, has resigned from running its petrochemicals subsidiary. The move is likely to be seen as the latest twist in a feud between Mr Ambani and his brother Mukesh. Anil, 45, has stepped down as director and vicechairman of Indian Petrochemicals Corporation (IPC). The company was n…	business	reliance unit loses anil ambani anil ambani brothers charge india largest private company resigned running petrochemicals subsidiary move twist feud ambani brother mukesh anil stepped director vicechairman indian petrochemicals corporation ipc company comment ipc owned reliance industries mukesh mukesh spoken ownership issues brothers control reliance empire death father july reliance operations …	0	1	0	0	4	4	0	0	0	0	0	0	7	0	13	0	17	17	16
India opens skies to competition India will allow domestic commercial airlines to fly long haul international routes, a move it hopes will stoke competition and drive down prices. However, only state controlled carriers will be able to fly the lucrative Gulf routes, to countries such as Kuwait and Saudi Arabia, for at least three years. Jet Airways and Air Sahara are the two companies that will b…	business	india skies competition india domestic commercial airlines fly haul international routes move hopes stoke competition drive prices controlled carriers fly lucrative gulf routes countries kuwait saudi arabia jet airways air sahara companies benefit initially india develop airline industry booming economic growth drives demand travel monica chadha bbc delhi reporter air travel india increased previ…	0	1	0	0	4	4	4	4	4	4	8	8	11	11	8	8	8	8	11
Oil rebounds from weather effect Oil prices recovered in Asian trade on Tuesday, after falling in New York on milder winter weather across the US. With winter temperatures staying relatively high in the northern US, a barrel of light crude ended Monday down $1.33 to $42.12. However crude prices have rebounded in Asia, rising to $42.30 a barrel for February delivery. In London, trading of Brent cr…	business	oil rebounds weather oil prices recovered asian trade tuesday falling york milder winter weather winter temperatures staying northern barrel light crude monday crude prices rebounded asia rising barrel february delivery london trading brent crude suspended public holiday price fell east milder temperatures expected continue northern days analysts price oil fall decline temporary weather achilles …	0	1	0	0	4	4	4	4	4	4	4	4	4	4	4	4	4	4	4
Ban on forced retirement under 65 Employers will no longer be able to force workers to retire before 65, unless they can justify it. The government has announced that firms will be barred from 2006 from imposing arbitrary retirement ages. Under new European age discrimination rules, a default retirement age of 65 will be introduced. Workers will be permitted to request staying on beyond this comp…	business	ban forced retirement employers force workers retire justify government announced firms barred imposing arbitrary retirement ages european age discrimination rules default retirement age introduced workers permitted request staying compulsory retirement age employers refuse trade industry secretary patricia hewitt people forced default age statutory compulsory retirement age employers free contin…	1	1	1	1	1	1	1	8	8	8	8	8	8	8	8	1	8	8	8
Fed warns of more US rate rises The US looks set for a continued boost to interest rates in 2005, according to the Federal Reserve. Minutes of the December meeting which pushed rates up to 2.25% showed that policymakers at the Fed are worried about accelerating inflation. The clear signal pushed the dollar up to $1.3270 to the euro by 0400 GMT on Wednesday, but depressed US shares. "The markets a…	business	fed warns rate rises set continued boost rates federal reserve minutes december meeting pushed rates policymakers fed worried accelerating inflation signal pushed dollar euro gmt wednesday depressed shares markets starting fear aggressive fed richard yamarone argus dow jones dropped tuesday nasdaq falling key tech stocks hit broker downgrades dollar gained ground sterling tuesday reaching pound s…	0	1	0	4	4	4	4	4	4	4	4	4	4	4	4	4	11	4	4
Weak endofyear sales hit Next Next has said its annual profit will be £5m lower than previously expected because its endofyear clearance sale has proved disappointing. "Clearance rates in our endofseason sale have been below our expectations," the company said. The High Street retailer said it now expected to report annual profits of between £415m and £425m ($779m798m). Next's shares fell more th…	business	weak endofyear sales hit annual profit lower expected endofyear clearance sale proved disappointing clearance rates endofseason sale expectations company street retailer expected report annual profits shares fell release trading statement chief executive simon wolfson admitted festive sales expect normal christmas sales top analyst expectations wolfson menswear ranges bit previous wolfson disappo…	0	1	0	0	4	4	4	4	4	4	4	4	4	11	11	11	11	11	11
Tate Lyle boss bags top award Tate Lyle's chief executive has been named European Businessman of the Year by a leading business magazine. Iain Ferguson was awarded the title by US publication Forbes for returning one of the UK's "venerable" manufacturers to the country's top 100 companies. The sugar group had been absent from the FTSE 100 for seven years until Mr Ferguson helped it return to grow…	business	tate lyle boss bags top award tate lyle chief executive named european businessman leading business magazine iain ferguson awarded title publication forbes returning uk venerable manufacturers country top companies sugar absent ftse ferguson helped return growth tate shares leapt boosted firming sugar prices sales artificial sweeteners sagging stock price sevenyear hiatus ftse britain venerable m…	0	1	0	0	4	4	4	0	0	0	2	4	11	11	11	11	0	11	4
Krispy Kreme shares hit Shares in Krispy Kreme Doughnuts have taken a dunking on Wall Street after the firm revealed it would have to restate its 2004 financial reports. The company warned the move would cut its profits by $3.8m to $4.9m (£2m to £2.6m) or between 6.6% and 8.6%. Krispy Kreme said accounting errors had forced the move, adding that its board of directors made the decision to restate…	business	krispy kreme shares hit shares krispy kreme doughnuts dunking wall street firm revealed restate financial reports company warned move cut profits krispy kreme accounting errors forced move adding board directors decision restate accounts december company unavailable comment delayed news warned restate shares krispy kreme sank close news revelation month firm warned earnings cut result accounting …	0	1	0	0	4	0	0	0	0	0	0	0	0	11	11	11	0	11	11
Germany nears 1990 jobless level German unemployment rose for the 11th consecutive month in December making the year's average jobless total the highest since reunification. The seasonally adjusted jobless total rose a higher than expected 17,000 to 4.483 million, the Bundesbank said. Allowing for changes in calculating statistics, the average number of people out of work was the highest since 19…	business	germany nears jobless level german unemployment rose consecutive month december average jobless total reunification seasonally adjusted jobless total rose expected bundesbank allowing calculating statistics average people rate bad weather sluggish economy blamed rise increase onstart winter labour office chief frankjuergen weise unadjusted figures unemployment rose sectors construction laying wor…	0	1	0	0	4	4	4	4	4	4	4	4	4	4	4	4	11	4	4
Venezuela identifies 'idle' farms Venezuelan authorities have identified more than 500 farms, including 56 large estates, as idle as it continues with its controversial land reform policy. Under a 2001 land law, the government can tax or seize unused farm sites. A further 40,000 farms are yet to be inspected, the state's National Land Institute has told Associated Press. Vice president Jose Vicen…	business	venezuela identifies farms venezuelan authorities identified farms including estates idle continues controversial land reform policy land law government tax seize unused farm sites farms inspected national land institute told press vice president jose vicente rangel farmers ranchers titles lands productive fear critics land reform policy claim president hugo chavez enforce communiststyle economic…	1	1	0	0	0	0	0	0	0	0	0	0	0	8	8	8	8	8	16
Egypt to sell off stateowned bank The Egyptian government is reportedly planning to privatise one of the country's big public banks. An Investment Ministry official has told the Reuters news agency that the Bank of Alexandria will be sold sometime in 2005. The move is seen as evidence of a new commitment by the government to reduce the size of public sector. The official said the government has n…	business	egypt sell stateowned bank egyptian government reportedly planning privatise country public banks investment ministry official told reuters news agency bank alexandria sold move evidence commitment government reduce size public sector official government decided sale form public flotation decide method selling shares public strategic investor abroad analysts publicsector banks suited government m…	0	1	0	0	0	0	0	0	0	0	0	0	0	0	0	0	0	0	0
WalMart to pay $14m in gun suit The world's largest retailer, WalMart, has agreed to pay a total of $14.5m (£7.74m) to settle a lawsuit over gun sales violations in California. The lawsuit alleged WalMart committed thousands of gun sales violations in California between 2000 and 2003. The total payment includes $5m in fines and more than $4m to fund state compliance checks with gun laws and preve…	business	walmart pay gun suit largest retailer walmart agreed pay total settle lawsuit gun sales violations california lawsuit alleged walmart committed thousands gun sales violations california total payment includes fines fund compliance checks gun laws prevent ammunition sales minors walmart agreed suspend firearms sales california stores alleged violations included sale guns people allowed possess del…	0	1	0	0	0	0	0	0	0	0	0	0	0	8	8	8	8	11	11
Yukos heading back to US courts Russian oil and gas company Yukos is due in a US court on Thursday as it continues to fight for its survival. The firm is in the process of being broken up by Russian authorities in order to pay a $27bn (£14bn) tax bill. Yukos filed for bankruptcy in the US, hoping to use international business law to halt the forced sale of its key oil production unit, Yuganskneft…	business	yukos heading courts russian oil gas company yukos court thursday continues fight survival firm process broken russian authorities pay tax bill yukos filed bankruptcy hoping international business law halt forced sale key oil production unit yuganskneftegas unit sold oil firm rosneft auction disrupted yukos lawyers auction violated bankruptcy law company main shareholders vowed company buys asset…	0	1	0	0	0	0	0	0	0	0	0	0	0	0	0	0	0	0	0
Deutsche Boerse set to 'woo' LSE Bosses of Deutsche Boerse and the London Stock Exchange are to meet amid talk that a takeover bid for the LSE will be raised to £1.5bn ($2.9bn). Last month, the German exchange tabled a 530 pencepershare offer for LSE, valuing it at £1.3bn. Parisbased Euronext, owner of Liffe in London, has also said it is interested in bidding for LSE. Euronext is due to hold tal…	business	deutsche boerse set lse bosses deutsche boerse london stock exchange meet amid talk takeover bid lse raised month german exchange tabled pencepershare offer lse valuing parisbased euronext owner liffe london bidding lse euronext hold talks lse week reported ready raise fund bid euronext chief jeanfrancois theodore scheduled meet lse counterpart clara furse friday deutsche boerse chief werner seif…	0	0	0	0	4	4	4	0	4	0	11	11	11	11	11	11	11	18	18
Laura Ashley chief stepping down Laura Ashley is parting company with its chief executive Ainum MohdSaaid. The clothing and home furnishing retailer said Ms MohdSaaid had resigned for personal reasons. Her departure will come into effect on 1 February and follows the departure of cochief executive Rebecca Navarednam on 1 January. Ms MohdSaaid is to be replaced by Lillian Tan, presently a nonexecu…	business	laura ashley chief stepping laura ashley company chief executive ainum mohdsaaid clothing furnishing retailer ms mohdsaaid resigned personal reasons departure february departure cochief executive rebecca navarednam january ms mohdsaaid replaced lillian tan presently nonexecutive director company head malaysian retailer statement issued thursday laura ashley thanked ms mohdsaaid services company s…	0	1	0	0	4	4	4	0	0	0	11	11	11	11	11	11	11	11	11
US Airways staff agree to pay cut A union representing 5,200 flight attendants at bankrupt US Airways have agreed to a new contract that cuts pay by nearly 10%. The deal will help the carrier, trying to survive by cutting costs by nearly $1bn (£530m) a year, save about $94m. More than two thirds of its 28,000 staff have now accepted wage cuts. But talks are still continuing with a union represent…	business	airways staff agree pay cut union representing flight attendants bankrupt airways agreed contract cuts pay deal carrier survive cutting costs save thirds staff accepted wage cuts talks continuing union representing mechanics baggage handlers cleaners failed negotiate contract seventh largest carrier sought bankruptcy protection time september quickest deal difficulties faced aviation industry att…	0	1	0	0	0	4	4	4	4	4	0	8	11	11	11	8	11	8	11
Delta cuts fares in survival plan Delta Air Lines is cutting domestic fares by as much as 50% as part of a plan to ensure its financial survival. Other US carriers, including United, have sought bankruptcy protection, amid high fuel costs and competition from discount carriers. Delta is restructuring in a bid to fight off insolvency. This latest move to boost business has prompted speculation oth…	business	delta cuts fares survival plan delta air lines cutting domestic fares plan ensure financial survival carriers including united sought bankruptcy protection amid fuel costs competition discount carriers delta restructuring bid fight insolvency move boost business prompted speculation firms forced match fares hurting revenues sector delta simplifares trialled august tickets cincinnati secondlargest…	0	1	0	0	4	4	4	4	4	4	4	4	11	11	11	11	11	11	11
Profits jump at China's top bank Industrial and Commercial Bank (ICBC), China's biggest lender, has seen an 18% jump in profits during 2004. The increase in earnings has allowed the firm to write off bad loans and pave the way for a state bailout and eventual stockmarket listing. China is trying to clean up its banking system, which is weighed down by billions of dollars of unpaid loans. It has a…	business	profits jump china top bank industrial commercial bank icbc china biggest lender jump profits increase earnings allowed firm write bad loans pave bailout eventual stockmarket listing china clean banking system weighed billions dollars unpaid loans pumped largest banks identified icbc recipient aid icbc profits yuan bank statement percentage nonperforming loans dropped percentage icbc founded tota…	0	1	0	0	4	4	4	4	4	4	4	4	4	4	0	4	11	4	4
Green reports shun supply chain Nearly 20% more UK top 250 firms produced nonfinancial reports on social and environment issues than last year. But of the 145 companies reporting, 76% didn't examine their supply chains, says the annual Directions survey. Green groups say putting pressure on supply chains is a major way companies can reduce their environmental impact. The survey is published by co…	business	green reports shun supply chain uk top firms produced nonfinancial reports social environment issues companies reporting examine supply chains annual directions survey green putting pressure supply chains major companies reduce environmental impact survey published corporate social responsibility firm context branding firm salterbaxter blake leeharwood campaigns director greenpeace uk fairly mean…	1	1	0	0	1	1	1	8	8	8	8	8	8	8	15	15	0	8	8
Tsunami to cost Sri Lanka $1.3bn Sri Lanka faces a $1.3bn (£691m) bill in 2005 for reconstruction after the tsunami which killed more than 30,000 of its people, its central bank says. This estimate is preliminary, bank governor Sunil Mendis told reporters, and could rise in 2006. The island state is asking for about $320m from the International Monetary Fund to help pay for relief, he said. The b…	business	tsunami cost sri lanka sri lanka bill reconstruction tsunami killed people central bank estimate preliminary bank governor sunil mendis told reporters rise island international monetary fund pay relief bank rupees set lend lower rate lost property mendis half imf support freeze debt repayments free resources rest fiveyear emergency loan sri lanka hoping wider freeze creditors paris club creditors…	0	1	0	0	4	4	4	4	4	4	4	4	8	8	8	8	11	18	4
Indian oil firm eyes Yukos assets India's biggest oil exploration firm, Oil Natural Gas Corp (ONGC), says it is in talks to buy the former assets of troubled Russian crude producer Yukos. "We are in touch with the concerned Russian entities about the Yukos assets and other opportunities in Russia," said ONGC chairman Subir Raha. Local press had reported that ONGC was looking to buy 15% of Yukos' …	business	indian oil firm eyes yukos assets india biggest oil exploration firm oil natural gas corp ongc talks buy assets troubled russian crude producer yukos touch concerned russian entities yukos assets opportunities russia ongc chairman subir raha local press reported ongc buy yukos key oil production unit yukos broken russian authorities pay massive tax bill forced sell key production unit yuganskneft…	0	1	0	0	0	0	0	0	0	0	0	0	0	0	0	0	0	0	0
Monsanto fined $1.5m for bribery The US agrochemical giant Monsanto has agreed to pay a $1.5m (£799,000) fine for bribing an Indonesian official. Monsanto admitted one of its employees paid the senior official two years ago in a bid to avoid environmental impact studies being conducted on its cotton. In addition to the penalty, Monsanto also agreed to three years' close monitoring of its business…	business	monsanto fined bribery agrochemical giant monsanto agreed pay fine bribing indonesian official monsanto admitted employees paid senior official ago bid avoid environmental impact studies conducted cotton addition penalty monsanto agreed close monitoring business practices american authorities accepted responsibility called improper activities senior manager monsanto directed indonesian consulting…	0	1	0	0	0	0	0	8	8	8	8	8	8	8	8	8	8	18	18
Marsh executive in guilty plea An executive at US insurance firm Marsh McLennan has pleaded guilty to criminal charges in connection with an ongoing fraud and bidrigging probe. New York Attorney General Elliot Spitzer said senior vice president Robert Stearns had pleaded guilty to scheming to defraud. The offence carries a sentence of 16 months to four years in state prison. Mr Spitzer's office a…	business	marsh executive guilty plea executive insurance firm marsh mclennan pleaded guilty criminal charges connection ongoing fraud bidrigging probe york attorney elliot spitzer senior vice president robert stearns pleaded guilty scheming defraud offence carries sentence months prison spitzer office stearns agreed testify future industry inquiry saddened development marsh statement company continue coop…	0	1	0	0	0	0	0	0	0	0	0	0	0	0	0	11	11	18	18
US interest rate rise expected US interest rates are expected to rise for the fifth time since June following the US Federal Reserve's latest ratesetting meeting later on Tuesday. Borrowing costs are tipped to rise by a quarter of a percentage point to 2.25%. The move comes as a recovery in the US economy, the world's biggest, shows signs of robustness and sustainability. The dollar's recordbreak…	business	rate rise expected rates expected rise time june federal reserve ratesetting meeting tuesday borrowing costs tipped rise quarter percentage move recovery economy biggest signs robustness sustainability dollar recordbreaking decline spooked markets oil prices raised concerns pace inflation evidence inflation moving ken kim analyst stone mccarthy risk happening kim borrowing costs rise fed move mea…	0	1	0	4	4	4	4	4	4	4	4	4	4	4	4	4	11	4	4
WorldCom bosses' $54m payout Ten former directors at WorldCom have agreed to pay $54m (£28.85m), including $18m from their own pockets, to settle a class action lawsuit, reports say. James Wareham, a lawyer representing one of the directors, told Reuters the 10 had agreed to pay those who lost billions when the firm collapsed. The remaining $36m will be paid by the directors' insurers. But, a spo…	business	worldcom bosses payout ten directors worldcom agreed pay including pockets settle class action lawsuit reports james wareham lawyer representing directors told reuters agreed pay lost billions firm collapsed remaining paid directors insurers spokesman prosecutor york comptroller alan hevesi formal agreement corporate governance experts directors dip pockets settlement set standard accountability …	0	1	0	0	0	0	0	0	0	0	0	0	0	0	11	11	11	11	18
Continental 'may run out of cash' Shares in Continental Airlines have tumbled after the firm warned it could run out of cash. In a filing to US regulators the airline warned of "inadequate liquidity" if it fails to reduce wage costs by $500m by the end of February. Continental also said that, if it did not make any cuts, it expects to lose "hundreds of millions of dollars" in 2005 in current mark…	business	continental cash shares continental airlines tumbled firm warned cash filing regulators airline warned inadequate liquidity fails reduce wage costs february continental cuts expects lose hundreds millions dollars current market conditions failure cutbacks push reduce fleet shares biggest carrier fallen news gmt reduction wage benefit costs reasonable prospect future profitability ability raise ad…	0	1	0	0	4	4	4	4	4	4	4	4	11	11	11	11	11	11	11
House prices rebound says Halifax UK house prices increased by 1.1% in December, the first monthly rise since September, the Halifax has said. The UK's biggest mortgage lender said prices rose 15.1% over the whole of 2004, but by only 2.8% in the second half of the year. The average price of a house in the UK now stands at £162,086, Halifax said. The survey seems to fly in the face of recent evid…	business	house prices rebound halifax uk house prices increased december monthly rise september halifax uk biggest mortgage lender prices rose half average price house uk stands halifax survey fly evidence uk housing market slowing response rate rises week nationwide house prices fell december annual inflation running low tuesday figures bank england mortgages approved uk fallen lowest level decade loans …	0	1	0	0	4	4	4	4	4	4	4	4	4	4	4	4	11	4	4
Mixed Christmas for US retailers US retailers posted mixed results for December with luxury retailers faring well while many others were forced to slash prices to lift sales. Upscale department store Nordstrom said same store sales were 9.3% higher than during the same period last year. Trendy youth labels also sold well, with sales jumping 28% at young women's clothing retailer Bebe Stores and 3…	business	mixed christmas retailers retailers posted mixed december luxury retailers faring forced slash prices lift sales upscale department store nordstrom store sales period trendy youth labels sold sales jumping women clothing retailer bebe stores american eagle outfitters walmart sales rise cut prices company rise december sales rise earlier customers biggest retailer vulnerable america economic woes …	0	1	0	0	4	4	4	4	4	4	4	11	4	11	11	11	11	11	11
India's Deccan gets more planes Air Deccan has signed a deal to acquire 36 planes from Avions de Transport Regional (ATR). The value of the deal has not been revealed, because of a confidentiality clause in the agreement. But Air Deccan's managing director Gorur Gopinath has said the price agreed was less than the catalogue price of $17.6m (£9.49m) per plane. Recently, India's first lowcost airli…	business	india deccan planes air deccan signed deal acquire planes avions de transport regional atr deal revealed confidentiality clause agreement air deccan managing director gorur gopinath price agreed catalogue price plane india lowcost airline airbus planes agreement air deccan buy atr lease atr provide hand airplanes statement atr deliveries aircraft continue fiveyear period gopinath planes connect r…	0	1	0	0	0	4	6	8	0	0	8	8	11	11	8	8	8	8	11
South African car demand surges Car manufacturers with plants in South Africa, including BMW, General Motors, Toyota and Volkswagen, have seen a surge in demand during 2004. New vehicle sales jumped 22% to 449,603 from a year earlier, the National Association of Automobile Manufacturers of South Africa (NAAMSA) said. Strong economic growth and low interest rates have driven demand, and analysts e…	business	south african car demand surges car manufacturers plants south africa including bmw motors toyota volkswagen surge demand vehicle sales jumped earlier national association automobile manufacturers south africa naamsa strong economic growth low rates driven demand analysts expect trend continue naamsa expects sales top south africa performing markets internationally car sales naamsa domestic deman…	0	1	0	0	4	4	4	4	4	4	4	4	4	4	4	4	11	4	4
UK bank seals South Korean deal UKbased bank Standard Chartered said it would spend $3.3bn (£1.8bn) to buy one of South Korea's main retail banks. Standard Chartered said acquiring Korea First Bank (KFB) fulfilled a strategic objective of building a bigger presence in Asia's third largest economy. Its shares fell nearly 3% in London as the bank raised funds for the deal by selling new stocks wort…	business	uk bank seals south korean deal ukbased bank standard chartered spend buy south korea main retail banks standard chartered acquiring korea bank kfb fulfilled strategic objective building bigger presence asia largest economy shares fell london bank raised funds deal selling stocks worth equal share capital standard chartered expects future revenue kfb south korean bank total assets move citigroup …	0	1	0	0	4	4	4	4	4	4	11	11	11	11	11	11	11	11	11
DaimlerChrysler's 2004 sales rise USGerman carmaker DaimlerChrysler has sold 2.1% more cars in 2004 than in the previous year, as solid Chrysler sales offset a weak showing for Mercedes. Sales totalled 3.9 million units worldwide during 2004, the company said at the Detroit Motor Show. A switch to new models hit luxury marque MercedesBenz, with sales down 3.1% at 1.06 million. Chrysler avoided th…	business	daimlerchrysler sales rise usgerman carmaker daimlerchrysler sold cars previous solid chrysler sales offset weak mercedes sales totalled units worldwide company detroit motor switch models hit luxury marque mercedesbenz sales chrysler avoided fate rivals ford motors lost ground japanese firms sales rose units smart brand compact cars division sales jumping future brand controlled mercedes daimler…	0	0	0	0	4	4	4	4	4	7	7	4	4	4	11	11	11	11	7
Tsunami cost hits Jakarta shares The stock market in Jakarta has seen its biggest slide in a month, after the country doubled the likely cost of rebuilding from the Asian tsunami. The fall came as Indonesia said it expected debt repayments of up to 30 trillion rupiah ($3.2bn; £1.7bn) to be frozen to help pay for the recovery. By Monday's close, the Jakarta Stock Exchange was down 2.1% at 1,011.15…	business	tsunami cost hits jakarta shares stock market jakarta biggest slide month country doubled cost rebuilding asian tsunami fall indonesia expected debt repayments trillion rupiah frozen pay recovery monday close jakarta stock exchange bar slight dip jse risen steadily tsunami hit december construction property companies gained ground banks main fallers monday people believed killed indonesia country…	0	1	0	0	4	4	4	4	4	4	4	4	11	11	11	11	11	18	18
Iran budget seeks state selloffs Iran's president, Mohammad Khatami, has unveiled a budget designed to expand public spending by 30% but loosen the Islamic republic's dependence on oil. The budget for the fiscal year starting on 21 March calls for the selloff of 20% of the state's corporate holdings. Mr Khatami's second term as president ends on 1 August, making this his last budget. But oppositi…	business	iran budget seeks selloffs iran president mohammad khatami unveiled budget designed expand public spending loosen islamic republic dependence oil budget fiscal starting march calls selloff corporate holdings khatami term president august budget opposition parliament attacked previous privatisations block plans elections ousted khatami supporters parliament favour hardline religious conservatives …	0	1	0	0	4	4	4	4	4	4	4	0	4	4	4	4	4	4	4
EC calls truce in deficit battle The European Commission (EC) has called a truce in its battle with France and Germany over breaching deficit limits. The move came after France and Germany vowed to run their budget deficits below the EU cap in 2005 for the first time in four years. But, the EC did warn the two were under close scrutiny and it would act if their fiscal situations deteriorated. Und…	business	ec calls truce deficit battle european commission ec called truce battle france germany breaching deficit limits move france germany vowed budget deficits eu cap time ec warn close scrutiny fiscal situations deteriorated eu rules countries deficits france germany breach row countries broken european union stability growth pact rules eurozone biggest economies left pact tatters november persuaded …	0	1	0	0	4	4	4	8	8	8	8	8	8	8	8	8	8	4	8
Enron bosses in $168m payout Eighteen former Enron directors have agreed a $168m (£89m) settlement deal in a shareholder lawsuit over the collapse of the energy firm. Leading plaintiff, the University of California, announced the news, adding that 10 of the former directors will pay $13m from their own pockets. The settlement will be put to the courts for approval next week. Enron went bankrupt i…	business	enron bosses payout eighteen enron directors agreed settlement deal shareholder lawsuit collapse energy firm leading plaintiff university california announced news adding directors pay pockets settlement courts approval week enron bankrupt emerged hidden hundreds millions dollars debt collapse firm seventh biggest public company revenue demise shockwaves financial markets dented investor confiden…	0	1	0	0	0	0	0	0	0	0	0	0	0	0	0	11	0	18	18
UK house prices dip in November UK house prices dipped slightly in November, the Office of the Deputy Prime Minister (ODPM) has said. The average house price fell marginally to £180,226, from £180,444 in October. Recent evidence has suggested that the UK housing market is slowing after interest rate increases, and economists forecast a drop in prices during 2005. But while the monthly figures may…	business	uk house prices dip november uk house prices dipped november office deputy prime minister odpm average house price fell marginally october evidence suggested uk housing market slowing rate increases economists forecast drop prices monthly figures hint cooling market annual house price inflation strong november economists forecast odpm figures weakening annual house price growth coming months hous…	0	1	0	0	4	4	4	4	4	4	4	4	4	4	4	4	11	4	4
Steady job growth continues in US The US created fewer jobs than expected in December, but analysts said that the dip in hiring was not enough to derail the world's biggest economy. According to Labor Department figures, 157,000 new jobs were added last month. That took 2004's total to 2.2 million, the best showing in five years. Job creation was one of last year's main concerns for the US econom…	business	steady job growth continues created fewer jobs expected december analysts dip hiring derail biggest economy labor department figures jobs month total job creation main concerns economy worries remain conditions set steady growth analysts unemployment rate stayed december jobs created month figure drop respectable report michael moran analyst daiwa securities payroll growth december lighter consen…	0	1	0	0	4	4	4	4	4	4	4	4	4	4	4	4	11	4	4
Barclays shares up on merger talk Shares in UK banking group Barclays have risen on Monday following a weekend press report that it had held merger talks with US bank Wells Fargo. A tieup between Barclays and Californiabased Wells Fargo would create the world's fourth biggest bank, valued at $180bn (£96bn). Barclays has declined to comment on the report in the Sunday Express, saying it does not r…	business	barclays shares merger talk shares uk banking barclays risen monday weekend press report held merger talks bank fargo tieup barclays californiabased fargo create fourth biggest bank valued barclays declined comment report sunday express respond market speculation banks reportedly held talks october november barclays shares pence pence late morning london monday biggest gainer ftse uk banking icon…	0	1	0	0	4	4	4	4	4	0	4	4	11	11	11	11	11	11	11
US firm 'bids for Lacroix label' A US firm has said it is in final negotiations with luxury goods group LVMH to buy the lossmaking Christian Lacroix hautecouture house. Parisbased LVMH has been selling noncore businesses and focusing on its most profitable labels including Moet Chandon champagne and Louis Vuitton. Privatelyheld Falic Group bought two cosmetics brands, Hard Candy and Urban Decay, …	business	firm lacroix label firm final negotiations luxury lvmh buy lossmaking christian lacroix hautecouture house parisbased lvmh selling noncore businesses focusing profitable labels including moet chandon champagne louis vuitton privatelyheld falic bought cosmetics brands hard candy urban decay lvmh florida company chain duty free stores lvmh refused comment reports brothers falic firm held talks desi…	0	0	0	0	0	0	0	0	0	6	11	11	11	11	11	0	11	11	11
$1m payoff for former Shell boss Shell is to pay $1m (£522,000) to the exfinance chief who stepped down from her post in April 2004 after the firm overstated its reserves. Judy Boynton finally left the firm on 31 December, having spent the intervening time as a special advisor to chief executive Jeroen van der Veer. In January 2004, Shell told shocked investors that its reserves were 20% smaller …	business	payoff shell boss shell pay exfinance chief stepped post april firm overstated reserves judy boynton finally left firm december spent intervening time special advisor chief executive jeroen van der veer january shell told shocked investors reserves shell payoff ms boynton contract leaving mutual agreement pursue career opportunities firm statement severance package longterm share options fails co…	0	1	0	0	0	0	0	0	0	0	0	0	0	0	11	5	0	18	5
India and Iran in gas export deal India has signed a $40bn (£21bn) deal to import millions of tonnes of liquefied natural gas from Iran. Firms led by the Oil Natural Gas Corporation (ONGC) will also assist in the development of Iranian oil fields. Ministers, eager to gain access to energy supplies to meet the demands of a booming economy, secured a similar deal to one between Iran and China. The …	business	india iran gas export deal india signed deal import millions tonnes liquefied natural gas iran firms led oil natural gas corporation ongc assist development iranian oil fields ministers eager gain access energy supplies meet demands booming economy secured deal iran china announcement ongc talks buy assets troubled russian oil firm yukos agreements iran sealed talks delhi middle east producers as…	0	1	0	0	0	0	0	0	0	0	0	0	0	0	0	0	0	0	0
LSE 'sets date for takeover deal' The London Stock Exchange (LSE) is planning to announce a preferred takeover by the end of the month, newspaper reports claim. The Sunday Telegraph said the LSE's plan was further evidence it wants to retain tight control over its destiny. Both Deutsche Boerse and rival Euronext held talks with the London market last week over a possible offer. A £1.3bn offer fro…	business	lse takeover deal london stock exchange lse planning preferred takeover month newspaper reports claim sunday telegraph lse plan evidence retain tight control destiny deutsche boerse rival euronext held talks london market week offer offer deutsche boerse rejected euronext cash bid speculation suggests parisbased euronext facilities bid german rival bid mark tabled formal bid lse expected hold tal…	0	0	0	0	4	4	4	0	0	0	11	11	11	11	11	11	11	18	18
News Corp makes $5.4bn Fox offer News Corporation is seeking to buy out minority investors in Fox Entertainment Group, its broadcasting subsidiary, for about $5.4bn (£3.7bn). The media giant, run by Rupert Murdoch, owns 82% of the shares in the company, home to the Fox television network and the 20th Century Fox film studio. The move follows News Corp's decision to register its business in the US…	business	news corp fox offer news corporation seeking buy minority investors fox entertainment broadcasting subsidiary media giant rupert murdoch owns shares company fox television network century fox film studio move news corp decision register business century fox film releases heart huckabees robot fox hit tv series terms offer minority fox shareholders receive news corp shares return fox share hold an…	0	1	0	0	4	0	0	0	0	0	0	0	11	11	11	11	0	11	11
Israel looks to US for bank chief Israel has asked a US banker and former International Monetary Fund director to run its central bank. Stanley Fischer, vice chairman of banking giant Citigroup, has agreed to take the Bank of Israel job subject to approval from parliament and cabinet. His nomination by Prime Minister Ariel Sharon came as a surprise, and led to gains on the Tel Aviv stock market. …	business	israel bank chief israel banker international monetary fund director central bank stanley fischer vice chairman banking giant citigroup agreed bank israel job subject approval parliament cabinet nomination prime minister ariel sharon surprise led gains tel aviv stock market fischer speaks fluent hebrew israeli citizen job citizenship previous incumbent david klein argued finance ministry steps ja…	0	1	0	0	1	1	1	1	1	1	1	1	1	1	4	4	11	4	4
EUUS seeking deal on air dispute The EU and US have agreed to begin talks on ending subsidies given to aircraft makers, EU Trade Commissioner Peter Mandelson has announced. Both sides hope to reach a negotiated deal over state aid received by European aircraft maker Airbus and its US rival Boeing, Mr Mandelson said. Airbus and Boeing accuse each other of benefiting from illegal subsidies. Mr Mand…	business	euus seeking deal air dispute eu agreed talks subsidies aircraft makers eu trade commissioner peter mandelson announced hope reach negotiated deal aid received european aircraft maker airbus rival boeing mandelson airbus boeing accuse benefiting illegal subsidies mandelson eu hoped avoid resolve dispute trade organisation wto agreement eu confirmed willingness resolve dispute arisen mandelson hop…	0	1	0	0	0	4	0	8	0	0	8	0	8	8	8	8	0	8	18
Nortel in $300m profit revision Telecoms equipment maker Nortel Networks has sharply revised downwards its profits for the 2003 fiscal year. In a longawaited filing, Nortel said it had made $434m (£231m), compared to the previously reported $732m. But the figures revised after an audit which led to the sacking of the Canadian firm's chief showed revenue was about 4% higher than first thought. Nor…	business	nortel profit revision telecoms equipment maker nortel networks sharply revised profits fiscal longawaited filing nortel compared reported figures revised audit led sacking canadian firm chief revenue nortel shares lost climbed toronto tuesday nortel head frank dunn executives fired january company announced conducted internal audit securities police authorities canada conducting inquiries accoun…	0	1	0	0	4	0	4	0	0	0	0	0	0	0	11	11	0	11	11
Minister hits out at Yukos sale Russia's renationalisation of its energy industry needs to be reversed, a senior government figure has warned. Economy minister German Gref told the Kommersant newspaper that direct state involvement in oil was "unjustified". His comments follow the sale of much of oil giant Yukos to cover back taxes a deal which effectively took most of the firm's assets into publ…	business	minister hits yukos sale russia renationalisation energy industry reversed senior government figure warned economy minister german gref told kommersant newspaper direct involvement oil unjustified comments follow sale oil giant yukos cover taxes deal effectively firm assets public ownership december senior economic adviser called sale swindle century yuganskneftegaz unit produced yukos output sei…	0	1	0	0	0	0	0	0	0	0	0	0	0	0	0	0	0	0	0
Chinese exports rise 25% in 2004 Exports from China leapt during 2004 over the previous year as the country continued to show breakneck growth. The spurt put China's trade surplus a sore point with some of its trading partners at a sixyear high. It may also increase pressure on China to relax the peg joining its currency, the yuan, with the weakening dollar. The figures released by the Ministry o…	business	chinese exports rise exports china leapt previous country continued breakneck growth spurt china trade surplus sore trading partners sixyear increase pressure china relax peg joining currency yuan weakening dollar figures released ministry commerce china tax chief confirmed growth topped row administration taxation head xie xuren tightening controls tax evasion combined rapid expansion produce ri…	0	1	0	0	4	4	4	4	4	4	4	4	4	4	4	4	11	4	4
Karachi stocks hit historic high The Karachi Stock Exchange (KSE) has recorded its largest single day gain, surging 3.5% to a new high. The index rose 225.79 points in four hours of furious trading, with many investors optimistic that political stability could bring an economic boom. The KSE index closed at 6709.93 an overall gain of nearly 400 points in the first two trading days of the week. En…	business	karachi stocks hit historic karachi stock exchange kse recorded largest single day gain surging rose hours furious trading investors optimistic political stability bring economic boom kse closed gain trading days week energy telecommunication stocks performed recording rise monday morning kse performing stock market rising pakistani investors expecting kse repeat improve performance jubilant inve…	0	1	0	0	4	4	4	4	4	4	4	4	4	4	11	4	11	4	4
US trade gap ballooned in October The US trade deficit widened by more than expected in October, hitting record levels after higher oil prices raised import costs, figures have shown The trade shortfall was $55.5bn (£29bn), up 9% from September, the Commerce Department said. That pushed the 10 month deficit to $500.5bn. Imports rose by 3.4%, while exports increased by only 0.6%. A weaker dollar a…	business	trade gap ballooned october trade deficit widened expected october hitting record levels oil prices raised import costs figures trade shortfall september commerce department pushed month deficit imports rose exports increased weaker dollar increased cost imports drive export demand coming months worse expected david wyss standard poor york dollar increases price imports improved export direction …	0	1	0	0	4	4	4	4	4	4	4	4	4	4	4	4	11	4	4
US prepares for hybrid onslaught Sales of hybrid cars in the US are set to double in 2005, research suggests. Research group JD Power estimates sales will hit 200,000 in 2005, despite higher prices and customer scepticism. Carmakers are starting to build hybrid sports utility vehicles (SUVs), the fourwheeldrive vehicles which now dominate the US car market. Hybrids cut both petrol consumption and…	business	prepares hybrid onslaught sales hybrid cars set double suggests jd power estimates sales hit prices customer scepticism carmakers starting build hybrid sports utility vehicles suvs fourwheeldrive vehicles dominate car market hybrids cut petrol consumption emissions combining petrol engine electric motor constantly charged extra engine power jurisdictions notably california mandate low emissions c…	0	2	0	3	4	4	4	4	4	4	4	4	4	4	7	4	4	4	7
Mitsubishi in Peugeot link talks Troublehit Mitsubishi Motors is in talks with French carmaker PSA Peugeot Citroen about a possible alliance. On Tuesday Mitsubishi, the only major Japanese car firm in the red, confirmed earlier reports of negotiations. But a spokesman refused to comment on speculation that Mitsubishi could end up building cars for PSA and perhaps its Japanese rival Nissan. Mitsub…	business	mitsubishi peugeot link talks troublehit mitsubishi motors talks french carmaker psa peugeot citroen alliance tuesday mitsubishi major japanese car firm red confirmed earlier reports negotiations spokesman refused comment speculation mitsubishi building cars psa japanese rival nissan mitsubishi hit recall scandal withdrawal support shareholder daimlerchrysler usgerman firm majority shareholder de…	0	1	0	0	4	4	4	4	4	4	4	4	4	4	11	4	4	4	4
BA to suspend two Saudi services British Airways is to halt its flights from London Heathrow to Jeddah and Riyadh in Saudi Arabia from 27 March. The airline said the decision was a commercial one due to reduced passenger demand for the services. BA currently operates four flights per week from Heathrow to Jeddah, and three weekly journeys to Riyadh. It suspended flights to Saudi Arabia for three …	business	ba suspend saudi services british airways halt flights london heathrow jeddah riyadh saudi arabia march airline decision commercial reduced passenger demand services ba operates flights week heathrow jeddah weekly journeys riyadh suspended flights saudi arabia weeks autumn government warning threat uk aviation saudi arabia ba suspend saudi flights remain constant review march decision suspend fli…	0	1	0	0	0	4	4	8	4	8	4	12	12	12	11	12	12	15	12
Cairn Energy in Indian gas find Shares in Cairn Energy rose 3.8% to 1,088 pence on Tuesday after the UK firm announced a fresh gas discovery in northern India. The firm, which last year made a number of other new finds in the Rajasthan area, said the latest discovery could lead to large gas volumes. However, chief executive Bill Gammell cautioned that additional evalution was first needed at the …	business	cairn energy indian gas shares cairn energy rose pence tuesday uk firm announced fresh gas discovery northern india firm rajasthan discovery lead gas volumes chief executive bill gammell cautioned additional evalution site cairn granted approval extend rajasthan exploration approval indian government spokesman company decision carry investigations believed gas extent cairn string rajasthan elevat…	0	1	0	0	0	0	0	0	0	0	0	0	0	0	0	0	0	0	0
Asia quake increases poverty risk Nearly two million people across Asia could be thrown into poverty because of the Indian Ocean tsunami, the Asian Development Bank (ADB) has said. In its first overview of the disaster, the ADB said the impact on economic growth would be slight because major cities and factories escaped damage. But the blow to many lowincome people could be "enormous". The Paris …	business	asia quake increases poverty risk people asia thrown poverty indian ocean tsunami asian development bank adb overview disaster adb impact economic growth slight major cities factories escaped damage blow lowincome people enormous paris club rich creditor nations wednesday offered freeze debts owed tsunamihit countries move aimed helping south asian governments budgets rebuild devastated coastal s…	0	1	0	0	4	6	6	8	8	8	8	8	8	8	8	8	8	18	4
Fosters buys stake in winemaker Australian brewer Fosters has bought a large stake in Australian winemaker Southcorp, sparking rumours of a possible takeover. Fosters bought 18.8% of Southcorp, the global winemaker behind the Penfolds, Lindemans and Rosemount brands, for 4.17 Australian dollars per share. A bid at that price would value the company at A$3.1bn ($2.4bn; £1.25bn ). Fosters said it w…	business	fosters buys stake winemaker australian brewer fosters bought stake australian winemaker southcorp sparking rumours takeover fosters bought southcorp global winemaker penfolds lindemans rosemount brands australian dollars share bid price company fosters discussions lead major corporate announcement separate statement southcorp confirmed brewer talks firms sydney stock market suspend trading share…	0	0	0	0	0	0	0	0	0	0	0	0	11	11	11	0	0	18	18
ECB holds rates amid growth fears The European Central Bank has left its key interest rate unchanged at 2% for the 19th month in succession. Borrowing costs have remained on hold amid concerns about the strength of economic growth in the 12 nations sharing the euro, analysts said. Despite signs of pickup, labour markets and consumer demand remain sluggish, while firms are eyeing cost cutting meas…	business	ecb holds rates amid growth fears european central bank left key rate unchanged month succession borrowing costs remained hold amid concerns strength economic growth nations sharing euro analysts signs pickup labour markets consumer demand remain sluggish firms eyeing cost cutting measures redundancies oil prices upward pressure inflation rate surveys economists majority expect borrowing costs st…	0	1	0	0	4	4	4	4	4	4	4	4	4	4	4	4	11	4	4
China bans new tobacco factories The world's biggest tobacco consumer, China, has said it will not allow any new tobacco factories to be built. China already has more than enough cigarettemaking capacity, according to a spokesman for the tobacco industry regulator quoted in China Daily. The ban threatens to reignite tensions between the regulator and British American Tobacco, which plans to becom…	business	china bans tobacco factories biggest tobacco consumer china tobacco factories built china cigarettemaking capacity spokesman tobacco industry regulator quoted china daily ban threatens reignite tensions regulator british american tobacco plans china foreign cigarette maker spokeswoman bat declined comment report china wo tobacco factories built including joint ventures xing wangli spokesman tobac…	0	1	0	0	0	0	0	0	0	0	0	0	0	0	8	8	0	18	18
UK interest rates held at 4.75% The Bank of England has left interest rates on hold again at 4.75%, in a widelypredicted move. Rates went up five times from November 2003 as the bank sought to cool the housing market and consumer debt but have remained unchanged since August. Recent data has indicated a slowdown in manufacturing and consumer spending, as well as in mortgage approvals. And retail …	business	uk rates held bank england left rates hold widelypredicted move rates times november bank sought cool housing market consumer debt remained unchanged august data slowdown manufacturing consumer spending mortgage approvals retail sales disappointed christmas analysts putting drop consumer confidence rising rates accompanying slowdown housing market knocked consumers optimism causing sharp fall dem…	0	1	0	4	4	4	4	4	4	4	4	4	4	4	4	4	11	4	4
German economy rebounds Germany's economy, the biggest among the 12 countries sharing the euro, grew at its fastest rate in four years during 2004, driven by strong exports. Gross domestic product (GDP) rose by 1.7% last year, the statistical office said. The economy contracted in 2003. Foreign sales increased by 8.2% last year, compared with a 0.3% slide in private consumption. Concerns remain, …	business	german economy rebounds germany economy biggest countries sharing euro grew fastest rate driven strong exports gross domestic product gdp rose statistical office economy contracted foreign sales increased compared slide private consumption concerns remain strength euro weak domestic demand sluggish labour market european central bank ecb left benchmark rate unchanged thursday nineteenth month row…	0	1	0	0	4	4	4	4	4	4	4	4	4	4	4	4	11	4	4
US trade deficit widens sharply The gap between US exports and imports has widened to more than $60bn (£31.7bn), an alltime record. Figures from the Commerce Department for November showed exports down 2.3% to $95.6bn, while imports grew 1.3% to $155.8bn on rising consumer demand. Part of the expanding deficit came from high prices for oil imports. But the numbers suggested the sliding dollar whi…	business	trade deficit widens sharply gap exports imports widened alltime record figures commerce department november exports imports grew rising consumer demand expanding deficit prices oil imports suggested sliding dollar exports expensive impact slowing economic growth trade deficit bigger expected wall street prompted rapid response currency markets gmt dollar trading euro cent half weaker announcemen…	0	1	0	0	4	4	4	4	4	4	4	4	4	4	4	4	11	4	4
Trade gap narrows as exports rise The UK's trade gap narrowed in November, helped by a 7.5% rise in exports outside the European Union. According to the Office for National Statistics, the difference between what the UK exported and imported was £3.1bn ($5.8bn), down from October's £3.6bn. Overall UK exports including both goods and services rose by more than 3.2% to £24.8bn, although total impor…	business	trade gap narrows exports rise uk trade gap narrowed november helped rise exports european union office national statistics difference uk exported imported october uk exports including services rose total imports rose record deficit october november uk exported worth imported cumulative deficit eleven months stands period november improvement export levels european union rest office national stat…	0	1	0	0	4	4	4	4	4	4	4	4	4	4	4	4	11	4	4
Lesotho textile workers lose jobs Six foreignowned textile factories have closed in Lesotho, leaving 6,650 garment workers jobless, union officers told the AP news agency. Factory Workers Union secretary general Billy Macaefa blamed the closures on the end of worldwide textile quotas. The quotas for developing nations, ended on 1 January, gave them a set share of the rich countries' markets. They…	business	lesotho textile workers lose jobs foreignowned textile factories closed lesotho leaving garment workers jobless union officers told ap news agency factory workers union secretary billy macaefa blamed closures worldwide textile quotas quotas developing nations january set share rich countries markets limited amount countries china export markets united eu understand owners complaining south africa…	0	1	0	0	4	4	4	4	0	0	0	8	8	8	8	8	8	8	0
Kraft cuts snack ads for children Kraft plans to cut back on advertising of products like Oreo cookies and sugary KoolAid drinks as part of an effort to promote healthy eating. The largest US food maker will also add a label to its more nutritional and lowfat brands to promote the benefits. Kraft rival PepsiCo began a similar labelling initiative last year. The moves come as the firms face critic…	business	kraft cuts snack ads children kraft plans cut advertising products oreo cookies sugary koolaid drinks effort promote healthy eating largest food maker add label nutritional lowfat brands promote benefits kraft rival pepsico labelling initiative moves firms criticism consumer concerned rising levels obesity children major food manufacturers reformulating content calorieheavy products kraft adverti…	1	2	0	0	0	3	7	7	7	7	11	11	11	11	11	11	11	11	11
Khodorkovsky quits Yukos shares Jailed tycoon Mikhail Khodorkovsky has transferred his controlling stake in oil giant Yukos to a business partner. Mr Khodorkovsky handed over his entire 59.5% stake in holding company Group Menatep which controls Yukos to Leonid Nevzlin. A close ally of the exYukos boss, Mr Nevzlin is currently based in Israel. Mr Khodorkovsky handed over his stake after the force…	business	khodorkovsky quits yukos shares jailed tycoon mikhail khodorkovsky transferred controlling stake oil giant yukos business partner khodorkovsky handed entire stake holding company menatep controls yukos leonid nevzlin close ally exyukos boss nevzlin based israel khodorkovsky handed stake forced sale yukos core oil production unit yuganskneftegaz pay giant tax bill yuganskneftegaz sold auction dece…	0	1	0	0	0	0	0	0	0	0	0	0	0	0	0	0	0	0	0
Executive trio leave Aer Lingus Three senior executives of Ireland's stateowned airline, Aer Lingus, are set to leave early on 28 January after accusations of a conflict of interest. The trio are chief executive Willie Walsh, chief financial officer Brian Dunne and chief operations officer Seamus Kearney. The three have refused to confirm reports they plan to launch a private airline in competiti…	business	executive trio leave aer lingus senior executives ireland stateowned airline aer lingus set leave january accusations conflict trio chief executive willie walsh chief financial officer brian dunne chief operations officer seamus kearney refused confirm reports plan launch private airline competition aer lingus announced november quit reason decision announcement irish prime minister bertie ahern …	0	1	1	0	4	4	7	8	8	8	8	7	11	11	7	7	7	7	7
US in EU tariff chaos trade row The US has asked the World Trade Organisation to investigate European Union customs tariffs, which it says are inconsistent and hamper trade. The EU's own institutions have noted the uneven way EU customs rules are applied but failed to act, the US Trade Representative's Office said. Small and midsized US firms were worsthit, it added. The EU expanded from 15 to 25…	business	eu tariff chaos trade row trade organisation investigate european union customs tariffs inconsistent hamper trade eu institutions uneven eu customs rules applied failed trade representative office midsized firms worsthit eu expanded filed complaint talks failed solution move week eu stepped confrontation tense dispute aircraft subsidies european manufacturer airbus firm boeing eu trade commission…	0	1	0	0	0	0	0	8	8	8	8	8	8	8	8	8	8	8	8
News Corp eyes video games market News Corp, the media company controlled by Australian billionaire Rupert Murdoch, is eyeing a move into the video games market. According to the Financial Times, chief operating officer Peter Chernin said that News Corp is "kicking the tires of pretty much all video games companies". Santa Monicabased Activison is said to be one firm on its takeover list. Video g…	business	news corp eyes video games market news corp media company controlled australian billionaire rupert murdoch eyeing move video games market financial times chief operating officer peter chernin news corp kicking tires pretty video games companies santa monicabased activison firm takeover list video games business paper quoted chernin success products sony playstation microsoft xbox nintendo game cu…	1	2	3	3	3	3	7	7	7	7	7	7	7	7	7	7	7	7	7
US Ahold suppliers face charges US prosecutors have charged nine food suppliers with helping Dutch retailer Ahold inflate earnings by more than $800m (£428m). The charges have been brought against individuals as well as companies, alleging they created false accounts. Ahold hit the headlines in February 2003 after it emerged that there were accounting irregularities at its US subsidiary Foodservi…	business	ahold suppliers charges prosecutors charged food suppliers helping dutch retailer ahold inflate earnings charges brought individuals companies alleging created false accounts ahold hit headlines february emerged accounting irregularities subsidiary foodservice ahold top executives agreed settle fraud charges ahold admitted fraudulently inflated promotional allowances foodservice improperly consol…	0	1	0	0	0	0	0	0	0	0	0	11	11	0	9	14	11	11	14
WalMart fights back at accusers Two big US names have launched advertising campaigns to "set the record straight" about their products and corporate behaviour. The world's biggest retailer WalMart took out more than 100 full page adverts in national newspapers. The group is trying to see off criticism over it pay deals, benefits package and promotion strategy. Meanwhile, drugs group Eli Lilly is …	business	walmart fights accusers names launched advertising campaigns set record straight products corporate behaviour biggest retailer walmart adverts national newspapers criticism pay deals benefits package promotion strategy drugs eli lilly planning campaign false claims product prozac walmart kicked battle adverts newspapers wall street journal letter company president lee scott time public hear unfil…	0	1	0	0	0	0	0	0	0	0	8	8	11	11	1	11	1	11	11
US retail sales surge in December US retail sales ended the year on a high note with solid gains in December, boosted by strong car sales. Seasonally adjusted sales rose 1.2% in the month, compared to 0.1% a month earlier, boosted by a surge in shopping just before and after Christmas. Sales climbed 8% for the year, the best performance since an 8.5% rise in 1999, the Commerce Department added. T…	business	retail sales surge december retail sales note solid gains december boosted strong car sales seasonally adjusted sales rose month compared month earlier boosted surge shopping christmas sales climbed performance rise commerce department gains led jump auto sales dealers enhanced offers cars showrooms dealers forced cut prices december maintain sales growth tough quarter usual endofyear holiday sal…	0	1	0	0	4	4	4	4	4	4	4	4	4	4	4	4	11	4	4
Winemaker rejects Foster's offer Australian winemaker Southcorp has rejected a takeover offer worth 3.1bn Australian dollars ($2.3bn; £1.8bn) from brewing giant Foster's Group. Southcorp, whose brands include Penfolds, Rosemount and Lindemans, dismissed the offer as inadequate. The two companies held four days of talks after Foster's bought an 18.8% stake in Southcorp on 13 January. A merger woul…	business	winemaker rejects foster offer australian winemaker southcorp rejected takeover offer worth australian dollars brewing giant foster southcorp brands penfolds rosemount lindemans dismissed offer inadequate companies held days talks foster bought stake southcorp january merger create global player worldwide annual sales revenues southcorp foster takeover proposal offered excellent strategic fit und…	0	0	0	0	0	0	0	0	0	0	0	0	11	11	11	11	0	18	18
McDonald's boss Bell dies aged 44 Charlie Bell, the straighttalking former head of fastfood giant McDonald's, has died of cancer aged 44. Mr Bell was diagnosed with colorectal cancer in May last year, a month after taking over the top job. He resigned in November to fight the illness. Joining the company as a 15yearold parttime worker, Mr Bell quickly moved through its ranks, becoming Australia's…	business	mcdonald boss bell dies aged charlie bell straighttalking head fastfood giant mcdonald died cancer aged bell diagnosed colorectal cancer month top job resigned november fight illness joining company parttime worker bell moved ranks australia store manager popular gogetter credited helping revive mcdonald sales bell leaves wife daughter mourn passing charlie family hearts prayers chief executive j…	1	1	2	2	2	2	2	2	2	2	2	11	11	11	11	11	11	11	11
US industrial output growth eases US industrial production continued to rise in November, albeit at a slower pace than the previous month. The US Federal Reserve said output from factories, mines and utilities rose 0.3% in line with forecasts from a revised 0.6% increase in October. Analysts added that if the carmaking sector which saw production fall 0.5% had been excluded the data would have be…	business	industrial output growth eases industrial production continued rise november albeit slower pace previous month federal reserve output factories mines utilities rose forecasts revised increase october analysts carmaking sector production fall excluded data impressive increase industrial output grown analysts upbeat prospects economy increase production coming heels news recovery retail sales consi…	0	1	0	0	4	4	4	4	4	4	4	4	4	4	4	4	11	4	4
LSE doubts boost bidders' shares Shares in Deutsche Boerse have risen more than 3% after a shareholder fund voiced opposition to the firm's planned takeover of the London Stock Exchange. TCI, which claims to represent owners of 5% of Deutsche Boerse's (DB) shares, has complained that the £1.35bn ($2.5bn) offer for the LSE is too high. Opposition from TCI has fuelled speculation that the proposed …	business	lse doubts boost bidders shares shares deutsche boerse risen shareholder fund voiced opposition firm planned takeover london stock exchange tci claims represent owners deutsche boerse db shares complained offer lse opposition tci fuelled speculation proposed takeover fail rival exchange operator euronext bid lse euronext operates paris amsterdam brussels lisbon bourses deutsche boerse runs frankf…	0	0	0	0	4	4	4	0	0	0	11	11	11	11	11	11	11	18	18
Qantas considers offshore option Australian airline Qantas could transfer as many as 7,000 jobs out of its home country as it seeks to save costs, according to newspaper reports. Chief executive Geoff Dixon was quoted by The Australian newspaper as saying the carrier could no longer afford to remain "allAustralian". Unions criticised the possible move which may affect cabin and maintenance staff …	business	qantas considers offshore option australian airline qantas transfer jobs country seeks save costs newspaper reports chief executive geoff dixon quoted australian newspaper carrier afford remain allaustralian unions criticised move affect cabin maintenance staff qantas profitable airline staff based australia qantas confirmed recruit source products overseas joint ventures continue create jobs aus…	0	1	0	0	0	0	4	0	0	0	11	11	11	11	11	11	11	11	11
Gazprom 'in $36m backtax claim' The nuclear unit of Russian energy giant Gazprom is reportedly facing a 1bn rouble ($35.7m; £19.1m) backtax claim for the 20012003 period. Vedomosti newspaper reported that Russian authorities made the demand at the end of last year. The paper added that most of the taxes claimed are linked to the company's export activity. Gazprom, the biggest gas company in the w…	business	gazprom backtax claim nuclear unit russian energy giant gazprom reportedly facing rouble backtax claim period vedomosti newspaper reported russian authorities demand paper taxes claimed linked company export activity gazprom biggest gas company nuclear fuel giant atomstroieksport october main project atomstroieksport building nuclear plant iran source tension russia gazprom key players complex ru…	0	1	0	0	0	0	0	0	0	0	0	0	0	0	0	0	0	0	0
Germany calls for EU reform German Chancellor Gerhard Schroeder has called for radical reform of the EU's stability pact to grant countries more flexibility over their budget deficits. Mr Schroeder said existing fiscal rules should be loosened to allow countries to run deficits above the current 3% limit if they met certain criteria. Writing in the Financial Times, Mr Schroeder also said heads of…	business	germany calls eu reform german chancellor gerhard schroeder called radical reform eu stability pact grant countries flexibility budget deficits schroeder existing fiscal rules loosened countries deficits current limit met criteria writing financial times schroeder heads government reforms pact agreed economic summit march current eu rules limit size eurozone country deficit gdp countries exceed t…	0	1	0	1	1	1	1	8	8	8	8	8	8	8	8	8	8	8	8
Parmalat founder offers apology The founder and former boss of Parmalat has apologised to investors who lost money as a result of the Italian dairy firm's collapse. Calisto Tanzi said he would cooperate fully with prosecutors investigating the background to one of Europe's largest financial scandals. Parmalat was placed into bankruptcy protection in 2003 after a 14bn euro black hole was found in …	business	parmalat founder offers apology founder boss parmalat apologised investors lost money result italian dairy firm collapse calisto tanzi cooperate prosecutors investigating background europe largest financial scandals parmalat bankruptcy protection euro black hole accounts people lost money firm collapse tanzi issued statement lawyer hours questioning prosecutors parma january prosecutors seeking i…	0	1	0	0	0	0	0	0	0	0	0	0	0	0	0	0	0	18	18
'Golden economic period' to end Ten years of "golden" economic performance may come to an end in 2005 with growth slowing markedly, City consultancy Deloitte has warned. The UK economy could suffer a backlash from the slowdown in the housing market, triggering a fall in consumer spending and a rise in unemployment. Deloitte is forecasting economic growth of 2% this year, below Chancellor Gordon B…	business	economic period ten golden economic performance growth slowing markedly city consultancy deloitte warned uk economy suffer backlash slowdown housing market triggering fall consumer spending rise unemployment deloitte forecasting economic growth chancellor gordon brown forecast believes rates fall quarterly economic review deloitte uk economy enjoyed golden period decade unemployment falling low i…	0	1	0	0	4	4	4	4	4	4	4	4	4	4	4	4	11	4	4
Jobs go at Oracle after takeover Oracle has announced it is cutting about 5,000 jobs following the completion of its $10.3bn takeover of its smaller rival Peoplesoft last week. The company said it would retain more than 90% of Peoplesoft product development and product support staff. The cuts will affect about 9% of the 55,000 staff of the combined companies. Oracle's 18month fight to acquire Peo…	business	jobs oracle takeover oracle announced cutting jobs completion takeover rival peoplesoft week company retain peoplesoft product development product support staff cuts affect staff combined companies oracle fight acquire peoplesoft drawnout hardfought takeover battles times merged companies set major force enterprise software market size germany sap statement oracle notifying staff redundancies fri…	0	1	0	0	0	0	0	0	0	0	0	0	0	0	0	0	0	18	4
Beijingers fume over parking fees Choking traffic jams in Beijing are prompting officials to look at reorganising car parking charges. Car ownership has risen fast in recent years, and there are now two and a half million cars on the city's roads. The trouble is that the high status of car ownership is matched by expensive fees at indoor car parks, making motorists reluctant to use them. Instead …	business	beijingers fume parking fees choking traffic jams beijing prompting officials reorganising car parking charges car ownership risen fast half cars city roads trouble status car ownership matched expensive fees indoor car parks motorists reluctant roads clogged drivers circling search cheaper outdoor option price differences indoor outdoor lots unreasonable wang yan official beijing municipal commi…	0	1	0	0	0	0	0	0	0	0	0	0	0	0	8	8	0	0	0
GM issues 2005 profits warning General Motors has warned that it expects earnings this year be lower than in 2004. The world's biggest car maker is grappling with losses in its European business, and weak US sales. GM said higher healthcare costs in North America, and lower profits at its financial services subsidiary would hurt its performance in 2005. GM said it expects to meet its 2004 earning…	business	gm issues profits warning motors warned expects earnings lower biggest car maker grappling losses european business weak sales gm healthcare costs north america lower profits financial services subsidiary hurt performance gm expects meet earnings targets tough competitive environment gm brands buick cadillac chevrolet opel saab vauxhall europe reveal earnings january deliver shareholder payout sh…	0	1	0	0	4	4	4	4	4	4	4	4	11	11	11	11	11	11	4
US economy still growing says Fed Most areas of the US saw their economy continue to expand in December and early January, the US Federal Reserve said in its latest Beige Book report. Of the 12 US regions it identifies for the study, 11 showed stronger economic growth, with only the Cleveland area falling behind with a "mixed" rating. Consumer spending was higher in December than November, and fe…	business	economy growing fed economy continue expand december january federal reserve beige book report regions identifies study stronger economic growth cleveland falling mixed rating consumer spending december november festive sales employment picture improved fed labour markets firmed districts wage pressures remained modest beige book districts reported prices building materials manufacturing inputs r…	0	1	0	0	4	4	4	4	4	4	4	4	4	4	4	4	11	4	4
Wall Street cool to eBay's profit Shares in online auction house eBay fell 9.8% in afterhours trade on Wednesday, after its quarterly profits failed to meet market expectations. Despite seeing net profits rise by 44% to $205.4m (£110m) during October to December, from $142m a year earlier, Wall Street had expected more. EBay stock fell to $92.9 in afterhours trade, from a $103.05 end on Nasdaq. E…	business	wall street cool ebay profit shares online auction house ebay fell afterhours trade wednesday quarterly profits failed meet market expectations net profits rise october december earlier wall street expected ebay stock fell afterhours trade nasdaq ebay net revenue quarter rose boosted growth paypal payment service excluding special items ebay profit cents share analysts expected cents wall street …	0	1	0	0	4	4	4	4	4	4	4	4	11	11	11	11	11	11	11
[truncated: 1,761 more rows]
