# Supplementary material for: An adaptive method for determining the optimal number of topics in topic modeling
Source: PeerJ journal article supplement (doi:10.7717/peerj-cs.2723), 2025-02-28
Supplement: Code.zip [file bbcsport_nmf.xlsx]

## Sheet: Sheet1
content	type	new_nltk	topic2	topic3	topic4	topic5	topic6	topic7	topic8	topic9	topic12	topic10	topic11	topic13	topic14	topic15	topic16	topic17	topic18	topic19	topic20
Henman overcomes rival Rusedski Tim Henman saved a match point before fighting back to defeat British rival Greg Rusedski 4-6 7-6 (8-6) 6-4 at the Dubai Tennis Championships on Tuesday. World number 46 Rusedski broke in the ninth game to take a tight opening set. Rusedski had match point at 6-5 in the second set tie-break after Henman double-faulted, but missed his chance and Henman rallied to cl…	tennis	henman overcomes rival rusedski tim henman saved match fighting defeat british rival greg rusedski dubai tennis championships tuesday rusedski broke ninth game tight set rusedski match set henman missed chance henman rallied clinch set british superior strength decider earn sixth win rusedski serve held players alarms seventh game final set rusedski wild volley henman vital break furious rusedski…	1	2	2	1	5	0	5	1	7	1	1	5	4	7	14	1	15	6	10
Safin slumps to shock Dubai loss Marat Safin suffered a shock loss to unseeded Nicolas Kiefer in round one of the Dubai Tennis Championships. Playing his first match since winning the Australian Open, Safin showed some good touches but was beaten 7-6 (7-2) 6-4 by the in-form Kiefer. The German got on top in the first-set tie-break, striking a sweet forehand to win the first point against serve. A…	tennis	safin slumps shock dubai loss marat safin suffered shock loss unseeded nicolas kiefer round dubai tennis championships playing match winning australian safin touches beaten kiefer german top striking sweet forehand win serve maintained momentum set breaking russian inspired volley spain feliciano lopez lined round clash andre agassi beating thailand paradorn srichaphan lopez lost sets roger feder…	1	2	2	1	5	0	5	1	7	1	1	5	4	7	14	1	15	6	10
Ferrero eyes return to top form Former world number one Juan Carlos Ferrero insists he can get back to his best despite a tough start to 2005. The 2003 French Open champion has slipped to 64 in the world after a year of illness and injuries in 2004, but is confident that his form will return. "I don't know when it is going to happen," Ferrero told BBC Sport. "But I have a lot of confidence in me …	tennis	ferrero eyes return top form juan carlos ferrero insists tough start french champion slipped illness injuries confident form return happen ferrero told bbc sport lot confidence juan carlos feel mentally spaniard joins top field abn amro tennis tournament rotterdam week add wins rainer schuettler fourth seed david nalbandian round seeded tougher ferrero admitted play joachim johansson round week m…	1	2	2	1	5	0	5	1	4	1	7	5	10	7	7	10	15	5	9
Roddick into San Jose final Andy Roddick will play Cyril Saulnier in the final of the SAP Open in San Jose on Sunday. The American top seed and defending champion overcame Germany's Tommy Haas, the third seed, 7-6 (7-3) 6-3. And Saulnier survived an injury scare in his semi-final with seventh-seeded Austrian Jurgen Melzer. The Frenchman twisted his ankle early in the second set but overcame Melze…	tennis	roddick san jose final andy roddick play cyril saulnier final sap san jose sunday american top seed defending champion overcame germany tommy haas seed saulnier survived injury scare austrian jurgen melzer frenchman twisted ankle set overcame melzer left fuming series calls feeling horrible earlier week roddick tonight step direction returns standing depth hit perfect return roddick won broken st…	1	2	2	1	5	0	5	1	4	1	7	5	4	7	7	1	15	5	10
Federer claims Dubai crown World number one Roger Federer added the Dubai Championship trophy to his long list of successes - but not before he was given a test by Ivan Ljubicic. Top seed Federer looked to be on course for a easy victory when he thumped the eighth seed 6-1 in the first set. But Ljubicic, who beat Tim Henman in the last eight, dug deep to secure the second set after a tense tiebre…	tennis	federer claims dubai crown roger federer dubai championship trophy list successes test ivan ljubicic top seed federer looked easy victory thumped eighth seed set ljubicic beat tim henman dug deep secure set tense tiebreak swiss star federer lose cool style win deciding set match week final indoor tournament rotterdam federer triumphed ljubicic stretched sets start time play confidence rhythm fede…	1	2	2	1	5	0	5	1	7	1	1	5	4	7	14	1	15	6	10
Young debut cut short by Ginepri Fifteen-year-old Donald Young's first appearance in an ATP tennis tournament proved brief as the teenager went out in round one of the San Jose Open. Young shot to the top of the junior world rankings when he won the boys' singles at January's Australian Open. But the wildcard entry was dispatched by fellow American Robby Ginepri in straight sets, 6-2 6-2, in Cali…	tennis	debut cut short ginepri donald appearance atp tennis tournament proved teenager round san jose shot top junior rankings won boys singles january australian wildcard entry dispatched fellow american robby ginepri straight sets california happy tour debut fun chances beat players ranked top set losing games ginepri player win junior slam top global standings admitted impressed talented ginepri futu…	1	2	2	1	5	0	5	1	7	1	7	5	4	7	14	1	15	5	10
Melzer shocks Agassi Second seed Andre Agassi suffered a comprehensive defeat by Jurgen Melzer in the quarter-finals of the SAP Open. Agassi was often bamboozled by the Austrian's drop shots in San Jose, losing 6-3 6-1. Defending champion and top seed Andy Roddick rallied to beat Sweden's Thomas Enqvist 3-6 7-6 (8-6) 7-5. But unseeded Cyril Saulnier beat the fourth seed Vincent Spadea 6-2 6-4 and…	tennis	melzer shocks agassi seed andre agassi suffered comprehensive defeat jurgen melzer sap agassi bamboozled austrian drop shots san jose losing defending champion top seed andy roddick rallied beat sweden thomas enqvist unseeded cyril saulnier beat fourth seed vincent spadea tommy haas overcame eighth seed max mirnyi melzer beaten agassi meetings game plan executed perfectly tough play andre play ga…	1	2	2	1	5	0	5	1	7	1	7	5	4	7	14	1	15	6	10
Federer forced to dig deep Top seed Roger Federer had to save two match points before squeezing past Juan Carlos Ferrero at the Dubai Open. The world number one took two hours 15 minutes to earn his 4-6 6-3 7-6 victory, saving match points at 6-4 in the tiebreak before claiming it 8-6. Federer made a number of unforced errors early on, allowing Ferrero to take advantage and claim the first set. B…	tennis	federer forced dig deep top seed roger federer save match squeezing juan carlos ferrero dubai hours minutes earn victory saving match tiebreak claiming federer unforced errors allowing ferrero advantage claim set swiss star hit reach seventh seed russian mikhail youzhny russian beat germany rainer schuettler federer unduly worried sets consecutive match forced distance ivan ljubicic rotterdam fin…	1	2	2	1	5	0	5	1	7	1	1	5	4	7	14	1	15	6	10
Nadal marches on in Mexico Rafael Nadal continued his run of fine form to beat Guillermo Canas and reach the Mexican Open semis in Acapulco. Eighth seed Nadal, who picked up his second ATP title when he beat Alberto Martin in last week's Brazil Open, saw off the Argentine third seed 7-5 6-3. He now meets Argentine wild card Mariano Puerta, who followed up his win over top seed Carlos Moya by over…	tennis	nadal marches mexico rafael nadal continued fine form beat guillermo canas reach mexican semis acapulco eighth seed nadal picked atp title beat alberto martin week brazil argentine seed meets argentine wild card mariano puerta win top seed carlos moya overcoming spain felix mantilla czech seed czech jiri novak eliminated agustin calleri unseeded argentine won tournament ago plays spain albert mon…	1	2	2	1	5	0	5	1	7	1	1	5	4	7	14	1	15	5	10
Hantuchova in Dubai last eight Daniela Hantuchova moved into the quarter-finals of the Dubai Open, after beating Elene Likhotseva of Russia 7-5 6-4, and now faces Serena Williams. Australian Open champion Williams survived an early scare to beat Russia's Elena Bovina 1-6 6-1 6-4. World number one Lindsay Davenport and Anastasia Myskina also progressed. Davenport defeated China's Jie Zheng 6-2 7-5…	tennis	hantuchova dubai daniela hantuchova moved dubai beating elene likhotseva russia serena williams australian champion williams survived scare beat russia elena bovina lindsay davenport anastasia myskina progressed davenport defeated china jie zheng french champion myskina sailed opponent marion bartoli retired hurt american davenport fellow wimbledon champion conchita martinez spain ousted nathalie…	1	2	2	1	5	0	5	1	7	1	1	1	6	7	14	5	15	4	7
Parmar ruled out of Davis Cup tie A knee injury has forced Arvind Parmar out of Great Britain's Davis Cup tie in Israel and left Alex Bogdanovic in line to take the second singles place. Parmar picked up the injury last week and has failed to recover in time for the Europe/Africa Zone I tie, which begins in Tel Aviv on Friday. Bogdanovic looks set to take the second singles place alongside Greg R…	tennis	parmar ruled davis cup tie knee injury forced arvind parmar britain davis cup tie israel left alex bogdanovic singles parmar picked injury week failed recover time zone tie tel aviv friday bogdanovic set singles alongside greg rusedski gb captain jeremy bates andrew murray david sherwood doubles rubber bogdanovic murray pulled tournaments week injury expected fit jamie delgado lee childs called s…	1	2	2	1	5	0	5	1	4	1	7	5	10	7	7	10	15	5	9
Davenport hits out at Wimbledon World number one Lindsay Davenport has criticised Wimbledon over the issue of equal prize money for women. Reacting to a disputed comment by All England Club chairman Tim Phillips, the American said: "I think it is highly insulting if prize money is taken away. "Somebody, I think it was Mr Phillips, said they won't have money for flowers at Wimbledon. That's insult…	tennis	davenport hits wimbledon lindsay davenport criticised wimbledon issue equal prize money women reacting disputed comment england club chairman tim phillips american highly insulting prize money phillips wo money flowers wimbledon insulting england club spokesperson denied phillips remark insisting statement humorous radio interview conversation moved talking wimbledon grounds davenport speaking an…	1	2	2	1	5	0	5	1	7	1	1	1	6	7	14	5	15	4	7
Dogged Federer claims Dubai crown World number one Roger Federer added the Dubai Championship trophy to his long list of successes - but not before he was given a test by Ivan Ljubicic. Top seed Federer looked to be on course for a easy victory when he thumped the eighth seed 6-1 in the first set. But Ljubicic, who beat Tim Henman in the last eight, dug deep to secure the second set after a tense…	tennis	dogged federer claims dubai crown roger federer dubai championship trophy list successes test ivan ljubicic top seed federer looked easy victory thumped eighth seed set ljubicic beat tim henman dug deep secure set tense tiebreak swiss star federer lose cool style win deciding set match week final indoor tournament rotterdam federer triumphed ljubicic stretched start time play confidence rhythm fe…	1	2	2	1	5	0	5	1	7	1	1	5	4	7	14	1	15	6	10
Henman hopes ended in Dubai Third seed Tim Henman slumped to a straight sets defeat in his rain-interrupted Dubai Open quarter-final against Ivan Ljubicic. The Croatian eighth seed booked his place in the last four with a 7-5 6-4 victory over the British number one. Henman had looked on course to level the match after going 2-0 up in the second set, but his progress was halted as the rain interve…	tennis	henman hopes dubai seed tim henman slumped straight sets defeat dubai ivan ljubicic croatian eighth seed booked victory british henman looked level match set progress halted rain intervened ljubicic hit break seal fourth straight win henman earlier day spanish seed tommy robredo secured beat nicolas kiefer germany henman left cursing weather umpire breaks rain match incredibly frustrating henman …	1	2	2	1	5	0	5	1	7	1	1	5	4	7	14	1	15	6	10
Mirza shocks Kuznetsova Sania Mirza continued her remarkable rise with victory over US Open champion Svetlana Kuznetsova at the Dubai Championships on Tuesday. The 18-year-old Indian, who is already a huge star in her home country, won 6-4 6-2 in front of a delirious crowd. It was Mirza's sixth straight victory following her first WTA tournament win in Hyderabad last month. Earlier, Daniela Hantu…	tennis	mirza shocks kuznetsova sania mirza continued remarkable rise victory champion svetlana kuznetsova dubai championships tuesday indian huge star country won front delirious crowd mirza sixth straight victory wta tournament win hyderabad month earlier daniela hantuchova built improving form win sixth seed alicia molik mirza attention ankle injury game kuznetsova slipped staged dramatic comeback thr…	1	2	2	1	5	0	5	1	7	1	1	1	6	7	14	5	15	4	7
Hantuchova in Dubai last eight Daniela Hantuchova moved into the quarter-finals of the Dubai Open, after beating Elene Likhotseva of Russia 7-5 6-4, and now faces Serena Williams. Australian Open champion Williams survived an early scare to beat Russia's Elena Bovina 1-6 6-1 6-4. World number one Lindsay Davenport and Anastasia Myskina also progressed. Davenport defeated China's Jie Zheng 6-2 7-5…	tennis	hantuchova dubai daniela hantuchova moved dubai beating elene likhotseva russia serena williams australian champion williams survived scare beat russia elena bovina lindsay davenport anastasia myskina progressed davenport defeated china jie zheng french champion myskina sailed opponent marion bartoli retired hurt american davenport fellow wimbledon champion conchita martinez spain ousted nathalie…	1	2	2	1	5	0	5	1	7	1	1	1	6	7	14	5	15	4	7
Murray to make Cup history Andrew Murray will become Britain's youngest-ever Davis Cup player after it was confirmed he will play in the doubles against Israel on Saturday. The 17-year-old will play alongside fellow debutant David Sherwood against Israel's Jonathan Erlich and Andy Ram. Murray will eclipse the record set by Roger Becker back in 1952. Greg Rusedski takes Tim Henman's place as first…	tennis	murray cup history andrew murray britain davis cup player confirmed play doubles israel saturday play alongside fellow debutant david sherwood israel jonathan erlich andy ram murray eclipse record set roger becker greg rusedski takes tim henman choice singles alex bogdanovic play singles clash rusedski harel levy bogdanovic played singles rubbers australia noam okun murray brightest hope british …	1	2	2	1	5	0	5	1	4	1	7	5	10	7	7	10	15	6	9
Davenport hits out at Wimbledon World number one Lindsay Davenport has criticised Wimbledon over the issue of equal prize money for women. Reacting to a disputed comment by All England Club chairman Tim Phillips, the American said: "I think it is highly insulting if prize money is taken away. "Somebody, I think it was Mr Phillips, said they won't have money for flowers at Wimbledon. That's insult…	tennis	davenport hits wimbledon lindsay davenport criticised wimbledon issue equal prize money women reacting disputed comment england club chairman tim phillips american highly insulting prize money phillips wo money flowers wimbledon insulting england club spokesperson denied phillips remark insisting statement humorous radio interview conversation moved talking wimbledon grounds davenport speaking an…	1	2	2	1	5	0	5	1	7	1	1	1	6	7	14	5	15	4	7
Venus stunned by Farina Elia Venus Williams suffered a first-round defeat for the first time in four years at the Dubai Championships. Sylvia Farina Elia, who had lost all nine of her previous meetings with the American fifth seed, won 7-5 7-6 (8-6). Former Wimbledon champion Conchita Martinez and India's Sania Mirza, the oldest and youngest players in the draw, also reached the second round. Mar…	tennis	venus stunned farina elia venus williams suffered defeat time dubai championships sylvia farina elia lost previous meetings american seed won wimbledon champion conchita martinez india sania mirza players draw reached round martinez beat shinobu asagoe mirza beat jelena kostanic mirza indian woman win wta tour title month ground hyderabad champion svetlana kuznetsova remaining confident kuznetsov…	1	2	2	1	5	0	5	1	7	1	1	1	6	7	14	5	15	4	7
Martinez sees off Vinci challenge Veteran Spaniard Conchita Martinez came from a set down to beat Italian Roberta Vinci at the Qatar Open in Doha. The 1994 Wimbledon champion won 5-7 6-0 6-2 to earn a second round meeting with French Open champion Anastasia Myskina. Fifth seed Patty Schnyder also had a battle as she needed three sets to beat China's Na Li 7-5 3-6 7-5. Slovakian Daniela Hantuchova…	tennis	martinez vinci challenge veteran spaniard conchita martinez set beat italian roberta vinci qatar doha wimbledon champion won earn round meeting french champion anastasia myskina seed patty schnyder battle sets beat china li slovakian daniela hantuchova beat bulgarian magdaleena maleeva set round clash russian elena bovina veteran martinez trouble vinci italian clinching set breaks games vinci gam…	1	2	2	1	5	0	5	1	7	1	1	1	6	7	14	5	15	4	7
Serena becomes world number two Serena Williams has moved up five places to second in the world rankings after her Australian Open win. Williams won her first Grand Slam title since 2003 with victory over Lindsay Davenport, the world number one. Men's champion Marat Safin remains fourth in the ATP rankings while beaten finalist Lleyton Hewitt replaces Andy Roddick as world number two. Roger Feder…	tennis	serena serena williams moved rankings australian win williams won grand slam title victory lindsay davenport champion marat safin remains fourth atp rankings beaten finalist lleyton hewitt replaces andy roddick roger federer retains top spot safin overtaken hewitt leader champions race alicia molik lost thriller davenport women top time career rise australia player top women rankings time britain…	1	2	2	1	5	0	5	1	7	1	1	1	6	7	14	5	15	17	7
Hingis to make unexpected return Martina Hingis makes her return to competitve tennis after two years out of the game at the Volvo Women's Open in Pattaya, Thailand, on Tuesday. She faces German Marlene Weingartner in the first round. "As a competitor and athlete, I always want to win. I hope my body will hold up," said Hingis. "You miss being out there in a Grand Slam final and not competing. It…	tennis	hingis unexpected return martina hingis return competitve tennis game volvo women pattaya thailand tuesday german marlene weingartner round competitor athlete win hope body hold hingis grand slam final competing difference playing commenting tv lot retired surgery ankles wta event filderstadt germany october lost elena dementieva insisted comeback speaking thaliand hingis admitted happen body app…	1	2	2	1	5	0	5	1	7	1	1	1	6	7	14	5	15	4	7
Clijsters set for February return Tennis star Kim Clijsters will make her return from a career-threatening injury at the Antwerp WTA event in February. "Kim had considered returning to action in Paris on 7 February," a statement on her website said. "She's decided against this so that she does not risk the final phase of her recovery. If all goes well, Kim will make her return on February 15." Th…	tennis	clijsters set february return tennis star kim clijsters return injury antwerp wta event february kim considered returning action paris february statement website decided risk final phase recovery kim return february played october aggravating wrist injury belgian doctor treating belgian feared career player endured operation earlier season cure wrist hope pessimistic bruno willems clijsters marry…	1	2	2	1	5	0	5	1	7	1	1	1	6	7	14	5	15	4	7
Hewitt falls to Dent Lleyton Hewitt suffered a shock defeat to Taylor Dent in the quarter-finals of the Australian Hardcourt Championships in Adelaide on Friday. The top seed was a strong favourite for the title but went down 7-6 (7-4) 6-3 to the American. Dent will face Juan Ignacio Chela next after the fourth seed was too strong for Jurgen Melzer. Olivier Rochus beat third seed Nicolas Kiefer 6…	tennis	hewitt falls dent lleyton hewitt suffered shock defeat taylor dent australian hardcourt championships adelaide friday top seed strong favourite title american dent juan ignacio chela fourth seed strong jurgen melzer olivier rochus beat seed nicolas kiefer seed joachim johansson swede reached beating compatriot thomas enqvist striking ball johansson lot break chances care broke times broke key set	1	2	2	1	5	0	5	1	7	1	1	5	4	7	14	1	15	17	10
Angry Williams rejects criticism Serena Williams has angrily rejected claims that she and sister Venus are a declining force in tennis. The sisters ended last year without a Grand Slam title for the first time since 1998. But Serena denied their challenge was fading, saying: "That's not fair - I'm tired of not saying anything. "We've been practising hard. We've had serious injuries. I've had surg…	tennis	angry williams rejects criticism serena williams angrily rejected claims sister venus declining force tennis sisters grand slam title time serena denied challenge fading fair tired practising hard injuries surgery wimbledon final serena australian venus fourth round meaning grand slam appearances serena venus severe strain stomach injury tear torn played player alicia molik played mind venus erro…	1	2	2	1	5	0	5	1	7	1	1	1	6	7	14	5	15	4	7
Davenport dismantles young rival Top seed Lindsay Davenport booked her place in the last 16 of the Australian Open with a convincing 6-2 6-4 win over Nicole Vaidisova of the Czech Republic. The American had too much power for her 15-year-old opponent, breaking twice in the first set and once in the second. The German-born Vaidisova rallied well at times but was unable to find a way back after fal…	tennis	davenport dismantles rival top seed lindsay davenport booked australian convincing win nicole vaidisova czech republic american power opponent breaking set vaidisova rallied times unable falling set davenport closed ace plays karolina sprem round expecting tough opponent play davenport hits shots errors inexperience played role game improve sprem croatian seed russia elena likhovtseva powered fou…	1	2	2	1	5	0	5	1	7	1	1	1	6	7	14	5	15	4	7
Serena ends Sania Mirza's dream Sania Mirza, the first Indian woman to reach the third round of a Grand Slam tennis event, has lost to women's favourite Serena Williams. The 18-year-old Mirza, who got a wild card entry into the Australian Open in Melbourne, lost to Williams 1-6,4-6 in the third round. Williams took just 56 minutes to defeat Mirza and sail into the fourth round. The only other Ind…	tennis	serena sania mirza dream sania mirza indian woman reach round grand slam tennis event lost women favourite serena williams mirza wild card entry australian melbourne lost williams round williams minutes defeat mirza sail fourth round indian woman win match grand slam nirupama vaidyanathan vaidyanathan round australian playing biggest match life mirza impact williams stages game teenager confidenc…	1	2	2	1	5	0	5	1	7	1	1	1	6	7	14	5	15	4	7
Kuznetsova 'failed a drugs test' US Open champion Svetlana Kuznetsova has tested positive for a banned drug, according to Belgian authorities. Belgian sports minister Claude Eerdekens said that the Russian world number five tested positive for the stimulant ephedrine on 19 December. Kuznetsova was playing in an exhibition event in Charleroi at the time. Eerdekens said: "There is a problem. Ephedr…	tennis	kuznetsova drugs test champion svetlana kuznetsova tested positive banned drug belgian authorities belgian sports minister claude eerdekens russian tested positive stimulant ephedrine december kuznetsova playing exhibition event charleroi time eerdekens ephedrine discovered remains innocent proved guilty tested situation remains unclear tournament commissioned agency wada international tennis fed…	1	2	2	3	3	0	3	2	10	8	1	1	6	11	12	5	13	4	7
What now for British tennis? Tim Henman's decision to quit Davis Cup tennis has left the British team with a gargantuan void to fill. The world number seven is tied for fourth among his countrymen for wins in the history of the tournament (he has 36 from his 50 rubbers). And Great Britain's last Davis Cup win without Henman came against Slovenia as far back as 1996. Worse could follow, according …	tennis	british tennis tim henman decision quit davis cup tennis left british team gargantuan void fill tied fourth countrymen wins history tournament rubbers britain davis cup win henman slovenia worse follow british team chris bailey bailey told bbc sport tim announcement doubt greg rusedski top leave british ambitions sport premier team event captain jeremy bates singled alex bogdanovic andrew murray …	1	2	2	1	5	0	5	1	4	1	7	5	10	7	7	10	15	5	9
Hewitt overcomes wobble in Sydney Lleyton Hewitt gave himself the perfect preparation for next week's Australian Open with victory over Ivo Minar in the final of the Sydney International. The defending champion brushed aside the Czech qualifier 7-5 6-0. The Australian world number three strolled to the first five games of the match but was shocked as Minar won the next five. The top seed was ratt…	tennis	hewitt overcomes wobble sydney lleyton hewitt perfect preparation week australian victory ivo minar final sydney international defending champion brushed czech qualifier australian strolled games match shocked minar won top seed rattled recovered close set raced victory hour strange match momentum swings hewitt blocks extremely loosened bit settle notch hewitt lifted sydney title times hewitt pla…	1	2	2	1	5	0	5	1	7	1	1	1	6	7	14	5	15	17	7
Moya fights back for Indian title Carlos Moya became the first man to successfully defend the Chennai Open title by beating four-times finalist Paradorn Srichaphan 3-6 6-4 7-6 (7/5). The Spaniard then donated his 拢28,000 prize money to relief efforts for the victims of the Asian tsunami. The final was close throughout, with Thai second seed Srichaphan - the 2003 winner - closing out the first set…	tennis	moya fights indian title carlos moya defend chennai title beating finalist paradorn srichaphan spaniard donated prize money relief efforts victims asian tsunami final close thai seed srichaphan winner closing set moya set bouncing decider force win moya confirmed donating prize money tournament tsunami victims hoping difference lives contribution pledges players donate prize money tournament ahea…	1	2	2	1	5	0	5	1	4	1	7	5	10	7	7	10	15	5	9
Rochus shocks Coria in Auckland Top seed Guillermo Coria went out of the Heineken Open in Auckland on Thursday with a surprise loss to Olivier Rochus of Belgium. Coria lost the semi-final 6-4 6-4 to Rochus, who goes on to face Czech Jan Hernych, a 6-4 7-5 winner over Jose Acasuso of Argentina. Fifth seed Fernando Gonzalez eased past American Robby Ginepri 6-3 6-4. The Chilean will meet sixth seed…	tennis	rochus shocks coria auckland top seed guillermo coria heineken auckland thursday surprise loss olivier rochus belgium coria lost rochus czech jan hernych winner jose acasuso argentina seed fernando gonzalez eased american robby ginepri chilean meet sixth seed juan ignacio chela argentine beat potito starace rochus australian hardcourt championships adelaide week naturally delighted form unbelieva…	1	2	2	1	5	0	5	1	7	1	1	5	4	7	14	1	15	17	10
Johansson takes Adelaide victory Second seed Joachim Johansson won his second career title with a 7-5 6-3 win over Taylor Dent at the Australian hardcourt championships in Adelaide. The Swede was made to graft, American Dent surviving three break points in the fifth game of the match. But Johansson got the breakthrough with a sublime backhand return winner and won the second set with more ease. H…	tennis	johansson takes adelaide victory seed joachim johansson won career title win taylor dent australian hardcourt championships adelaide swede graft american dent surviving break game match johansson breakthrough sublime backhand return winner won set ease tournament win memphis helping leap rankings dent rated johansson top contender australian starts january tennis holding serve playing serve guys …	1	2	2	1	5	0	5	1	7	1	1	5	4	7	14	1	15	17	10
Hingis hints at playing comeback Martina Hingis has admitted that she might consider a competitive return to tennis if an appearance in Thailand later this month goes well. The former world number one will play at the Volvo Women's Open in Pattaya, which starts on 31 January, as part of her charity work in the region. "The tournament is a test," she said. "I don't know how my body will react. "I …	tennis	hingis hints playing comeback martina hingis admitted competitive return tennis appearance thailand month play volvo women pattaya starts january charity region tournament test body react support charities thailand playing speaking le matin swiss pattaya people players ranked hingis retired surgery ankles wta event filderstadt germany october lost elena dementieva	1	2	2	1	5	0	5	1	7	1	1	1	6	7	14	5	15	4	7
Slovakia seal Hopman Cup success Slovakia clinched the Hopman Cup for the second time by beating Argentina 3-0 in Saturday's final in Perth. Daniela Hantuchova put the third seeds ahead, recovering from a terrible start to beat Gisela Dulko 1-6 6-4 6-4. Dominik Hrbaty, who had not lost a set in his three singles matches in the group stages, then upset world number seven Guillermo Coria 6-4 6-1. H…	tennis	slovakia seal hopman cup success slovakia clinched hopman cup time beating argentina saturday final perth daniela hantuchova seeds ahead recovering terrible start beat gisela dulko dominik hrbaty lost set singles matches stages upset guillermo coria hantuchova hrbaty won mixed doubles coria forced withdraw sore slovakia win final defeat united congratulate daniela hrbaty nervous watching heart at…	1	2	2	1	5	0	5	1	7	1	1	1	6	7	14	5	15	4	7
Dementieva prevails in Hong Kong Elena Dementieva swept aside defending champion Venus Williams 6-3 6-2 to win Hong Kong's Champions Challenge event. The Russian, ranked sixth in the world, broke Williams three times in the first set, while losing her service once. Williams saved three championship points before losing the match at the Victoria Park tennis court. "It's really a great start to the…	tennis	dementieva prevails hong kong elena dementieva swept defending champion venus williams win hong kong champions challenge event russian ranked sixth broke williams times set losing service williams saved championship losing match victoria park tennis court start matter exhibition play dementieva confidence grand slams hard win tournament williams disappointed display played nice committing unforce…	1	2	2	1	5	0	5	1	7	1	1	1	6	7	14	5	15	4	7
Injury sidelines Philippoussis Mark Philippoussis withdrew from the Sydney International tennis tournament as expected on Sunday after suffering a groin injury during the Hopman Cup. His participation in the Australian Open, which begins on 17 January in Melbourne, also remains in doubt. Defending women's champion Justine Henin-Hardenne is also out of the Sydney event because of a knee injury. In…	tennis	injury sidelines philippoussis mark philippoussis withdrew sydney international tennis tournament expected sunday suffering groin injury hopman cup participation australian january melbourne remains doubt defending women champion justine sydney event knee injury main draw women singles match sunday nathalie dechy beat american lisa raymond seed lleyton hewitt quest fourth sydney title tuesday pla…	1	2	2	1	5	0	5	1	7	1	1	1	6	7	14	5	15	4	7
Hewitt falls to Dent in Adelaide Lleyton Hewitt suffered a shock defeat to Taylor Dent in the quarter-finals of the Australian Hardcourt Championships in Adelaide on Friday. The top seed was a strong favourite for the title but went down 7-6 (7-4) 6-3 to the American. Dent will face Juan Ignacio Chela next after the fourth seed was too strong for Jurgen Melzer. Olivier Rochus beat third seed Nico…	tennis	hewitt falls dent adelaide lleyton hewitt suffered shock defeat taylor dent australian hardcourt championships adelaide friday top seed strong favourite title american dent juan ignacio chela fourth seed strong jurgen melzer olivier rochus beat seed nicolas kiefer seed joachim johansson swede reached beating compatriot thomas enqvist striking ball johansson lot break chances care broke times brok…	1	2	2	1	5	0	5	1	7	1	1	5	4	7	14	1	15	17	10
Federer breezes into semi-finals Roger Federer reached the last four of the Qatar Open with an easy 6-1 6-2 win over seventh seed Feliciano Lopez. The Swiss world number one reeled off a series winners to outclass the Spaniard and set up a semi-final match against Russian Nikolay Davydenko. Federer, who lost in the quarter-final in his last Qatar appearance in 2003, was happy with his form. "I th…	tennis	federer breezes roger federer reached qatar easy win seventh seed feliciano lopez swiss reeled series winners outclass spaniard set match russian nikolay davydenko federer lost qatar appearance happy form played greg rusedski happy playing top seed lopez glimpses resolve set held service game close breaking federer swiss saved break broke serve game seize control davydenko upset french seed sebas…	1	2	2	1	5	0	5	1	7	1	1	5	4	7	14	1	15	6	10
Davenport puts retirement on hold Lindsay Davenport has put any talk of retirement on hold after having a largely injury-free 2004 campaign. The 28-year-old world number one had said that she would quit at the end of last year, but after a successful season she has had a change of heart. "Finally I felt I put myself in a position to try and win Grand Slams again," said Davenport. "It would be tou…	tennis	davenport retirement hold lindsay davenport talk retirement hold campaign quit successful season change heart finally position win grand slams davenport tough walk feel contend hanging davenport won grand slams australian wimbledon career hit series injuries started hitting top form won titles week hopman cup perth decided rest knee knee withstand rigours coming	1	2	2	1	5	0	5	1	7	1	1	1	6	7	14	5	15	4	7
Rusedski angry over supplements Greg Rusedski has criticised the governing body of men's tennis for not releasing contamination-free supplements in time for the new season. Rusedski said: "I tried to order some but didn't receive any and I haven't got any yet. "You would think they would have been available in December as it can take two months for the body to respond. "This event comes in the ho…	tennis	rusedski angry supplements greg rusedski criticised governing body tennis releasing supplements time season rusedski receive december months body respond event hottest period hope stuff british escaped ban persuaded tribunal positive doping test result contaminated atp supplements response atp struck deal pharmaceutical company glaxosmithkline provide drinks nutritional bars tour david higdon vic…	1	2	2	1	5	0	5	1	7	1	1	5	4	7	14	1	15	6	10
Navratilova hits out at critics Martina Navratilova has defended her decision to prolong her tennis career at the age of 48. Navratilova, who made a comeback after retiring in 1994, will play doubles and mixed doubles events in 2005. "Women's tennis is really strong," she said, dismissing suggestions that the fact she could still win reflected badly on the women's game. "All I can say is I'm that…	tennis	navratilova hits critics martina navratilova defended decision prolong tennis career age navratilova comeback retiring play doubles mixed doubles events women tennis strong dismissing suggestions win reflected badly women game damn blow horn navratilova won grand slam mixed doubles titles retirement encouraged form decided resume playing singles winning matches knocked round french reached round …	1	2	2	1	5	0	5	1	7	1	1	1	6	7	14	5	15	4	7
Prodigy Monfils blows away Gaudio French prodigy Gael Monfils underlined his huge promise by beating French Open champion Gaston Gaudio 6-4 7-6 (7-4) in the first round of the Qatar Open. The 18-year-old wild card won three of the four junior Grand Slam events last year, including Wimbledon. Fabrice Santoro, the 2000 champion, beat Sweden's Thomas Johansson 6-4 6-2 but fourth seed Mikhail Youzhny…	tennis	prodigy monfils blows gaudio french prodigy gael monfils underlined huge promise beating french champion gaston gaudio round qatar wild card won junior grand slam events including wimbledon fabrice santoro champion beat sweden thomas johansson fourth seed mikhail youzhny lost rafael nadal roger federer plays greg rusedski round wednesday monfils wildcard tournament win top player delighted play t…	1	2	2	1	5	0	5	1	7	1	1	5	4	7	14	1	15	6	10
Connors boost for British tennis Former world number one Jimmy Connors is planning a long-term relationship with the Lawn Tennis Association to help unearth the next Tim Henman. The American spent three days at the LTA's annual Elite Performance winter camp in La Manga earlier this week. "Britain has the right attitude," said Connors. "The more involved I can be with the LTA, the better. "A short…	tennis	connors boost british tennis jimmy connors planning relationship lawn tennis association unearth tim henman american spent days lta annual elite performance winter camp la manga earlier week britain attitude connors involved lta arrangement confusing kids lta chief executive john crowther relationship jimmy started develop coaches players jimmy weeks hope relationship camp played host leading sen…	0	2	2	0	5	0	5	1	4	1	7	6	5	7	5	9	5	6	13
Henin-Hardenne beaten on comeback Justine Henin-Hardenne lost to Elena Dementieva in a comeback exhibition match in Belgium on Sunday for her second defeat in two days. And the Belgian, who has slipped to eight in the world after struggling with a virus, faces a tough Australian Open title defence next month. "I will be heading to Australia with a lot of question marks over me, I know that," she …	tennis	beaten comeback justine lost elena dementieva comeback exhibition match belgium sunday defeat days belgian slipped struggling virus tough australian title defence month heading australia lot question marks pressure time champion speaking loss dementieva charleroi belgium sunday previous day olympic champion france nathalie dechy positive weeks body accustomed stress rhythm slid rankings half cont…	1	2	2	3	5	0	5	1	7	1	1	1	6	7	14	5	15	4	7
Moya clinches Cup for Spain Spain won the Davis Cup for the second time in their history when Carlos Moya beat the USA's Andy Roddick in the fourth rubber in Seville. Moya won 6-2 7-6 (7-1) 7-6 (7-5) to give the hosts an unassailable 3-1 lead with only one singles rubber remaining. Roddick battled hard and had chances in the second set, but Moya's clay-court expertise proved the difference. Mardy…	tennis	moya clinches cup spain spain won davis cup time history carlos moya beat usa andy roddick fourth rubber seville moya won hosts unassailable lead singles rubber remaining roddick battled hard chances set moya expertise proved difference mardy fish beat tommy robredo final dead rubber cut spain winning margin spain davis cup title beat australia barcelona time chose play final seville city olympic…	1	2	2	1	5	0	5	1	4	1	7	5	10	7	7	10	15	5	9
Capriati to miss Melbourne Jennifer Capriati has become the third leading lady to withdraw from the Australian Open because of injury. The organisers of the first grand slam of 2005, which begins on 17 January, said the American has a problem with her right shoulder. It comes as a blow to the women's draw as last year's champion, Justin Henin-Hardenne, and runner-up, Kim Clijsters, will also be a…	tennis	capriati melbourne jennifer capriati leading lady withdraw australian injury organisers grand slam january american shoulder blow women draw champion justin kim clijsters absent capriati champion melbourne wins believed picked injury advanta championships philadelphia november pull exhibition match wimbledon champion maria sharapova december capriati decided competing australian event sydney inte…	1	2	2	1	5	0	5	1	7	1	1	1	6	7	14	5	15	4	7
Classy Henman makes winning start Tim Henman opened his 2005 campaign with a 6-1 7-5 victory over Argentine David Nalbandian at the Kooyong Classic exhibition tournament on Wednesday. The British number one will next play Roger Federer at the Australian Open warm-up event on Friday. The world number one beat Gaston Gaudio 5-7 6-1 6-4, before Andre Agassi saw off Chilean Olympic gold medalist Nico…	tennis	classy henman winning start tim henman campaign victory argentine david nalbandian kooyong classic exhibition tournament wednesday british play roger federer australian event friday beat gaston gaudio andre agassi chilean olympic gold medalist nicolas massu andy roddick beat ivan ljubicic replaced paradorn srichaphan henman impressive start faltering nalbandian serving match briton regained compo…	1	2	2	1	5	0	5	1	7	1	1	5	4	7	14	1	15	6	10
Moya emotional after Davis Cup win Carlos Moya described Spain's Davis Cup victory as the highlight of his career after he beat Andy Roddick to end the USA's challenge in Seville. Moya made up for missing Spain's 2000 victory through injury by beating Roddick 6-2 7-6 (7-1) 7-6 (7-5) to give the hosts an unassailable 3-1 lead. "I have woken up so many nights dreaming of this day," said Moya. "All …	tennis	moya emotional davis cup win carlos moya spain davis cup victory highlight career beat andy roddick usa challenge seville moya missing spain victory injury beating roddick hosts unassailable lead woken nights dreaming day moya energy focused lived live spain davis cup title ago valencia beat australia moya nicknamed charly admitted davis cup dream bit nervous outset people obsessed helps reach go…	1	2	2	1	5	0	5	1	4	1	7	5	10	7	7	10	15	5	9
Moya emotional at Davis Cup win Carlos Moya described Spain's Davis Cup victory as the highlight of his career after he beat Andy Roddick to end the USA's challenge in Seville. Moya made up for missing Spain's 2000 victory through injury by beating Roddick 6-2 7-6 (7-1) 7-6 (7-5) to give the hosts an unassailable 3-1 lead. "I have woken up so many nights dreaming of this day," said Moya. "All my …	tennis	moya emotional davis cup win carlos moya spain davis cup victory highlight career beat andy roddick usa challenge seville moya missing spain victory injury beating roddick hosts unassailable lead woken nights dreaming day moya energy focused lived live spain davis cup title ago valencia beat australia moya nicknamed charly admitted davis cup dream bit nervous outset people obsessed helps reach go…	1	2	2	1	5	0	5	1	4	1	7	5	10	7	7	10	15	5	9
Capriati out of Australian Open Jennifer Capriati has become the third leading lady to withdraw from the Australian Open because of injury. The organisers of the first grand slam of 2005, which begins on 17 January, said the American has a problem with her right shoulder. It comes as a blow to the women's draw as last year's champion, Justin Henin-Hardenne, and runner-up, Kim Clijsters, will also…	tennis	capriati australian jennifer capriati leading lady withdraw australian injury organisers grand slam january american shoulder blow women draw champion justin kim clijsters absent capriati champion melbourne wins believed picked injury advanta championships philadelphia november pull exhibition match wimbledon champion maria sharapova december capriati decided competing australian event sydney int…	1	2	2	1	5	0	5	1	7	1	1	1	6	7	14	5	15	4	7
Bryan twins keep US hopes alive The United States kept the Davis Cup final alive with victory in Saturday's doubles rubber, leaving Spain 2-1 ahead going into the final day. Masters Cup champions Mike and Bob Bryan thrashed Juan Carlos Ferrero and Tommy Robredo 6-0 6-3 6-2 in front of a partisan crowd in Seville. Victory would have given Spain the title but they were outclassed. In Sunday's rever…	tennis	bryan twins hopes alive united davis cup final alive victory saturday doubles rubber leaving spain ahead final day masters cup champions mike bob bryan thrashed juan carlos ferrero tommy robredo front partisan crowd seville victory spain title outclassed sunday reverse singles carlos moya takes andy roddick rafael nadal mardy fish feels win tomorrow mike bryan feels guys shot spain sleep bob brya…	1	2	2	1	5	0	5	1	4	1	7	5	10	7	7	10	15	5	9
Faultless Federer has no equal Roger Federer - nice bloke, fantastic tennis player - the ultimate sportsman. When Lleyton Hewitt shook his hand after getting another thrashing, a third in as many months, the Australian said; "You're the best." How right he is. The stats speak for themselves: 11 titles from 11 finals during 2004 - three of them Grand Slams - and 13 final victories in a row going b…	tennis	faultless federer equal roger federer nice bloke fantastic tennis player ultimate sportsman lleyton hewitt shook hand thrashing months australian stats speak titles finals grand slams final victories row vienna record hewitt times houston form easily matched grand efforts outplayed hewitt andy roddick marat safin prominent realistically fighting ranking players federer swiss star league feel bit …	1	2	2	1	5	0	5	1	7	1	1	1	6	7	14	1	15	17	10
Mauresmo opens with victory in LA Amelie Mauresmo and Maria Sharapova won their opening matches at the Tour Championships in Los Angeles. France's Mauresmo routed Vera Zvonareva 6-1 6-0, while Wimbledon champion Sharapova was a 6-1 6-4 winner over fellow Russian Svetlana Kuznetsova. American Serena Williams also won, edging Russian Elena Dementieva 7-6 7-5 for her second victory of the event. The…	tennis	mauresmo victory la amelie mauresmo maria sharapova won matches tour championships los angeles france mauresmo routed vera zvonareva wimbledon champion sharapova winner fellow russian svetlana kuznetsova american serena williams won edging russian elena dementieva victory event event split top advancing mauresmo win ninth row overtake lindsay davenport spot mauresmo spent weeks injury ushered dav…	1	2	2	1	5	0	5	1	7	1	1	1	6	7	14	5	15	4	7
Agassi fear for Melbourne Andre Agassi's involvement in the Australian Open was put in doubt after he pulled out of the Kooyong Classic with a hip injury. Agassi was serving at 5-6 down in the first set to fellow American Andy Roddick when he decided to bring a premature end to the match. "My hip was cramping and I just could not continue," said the 34-year-old. Agassi, who has won the Australian…	tennis	agassi fear melbourne andre agassi involvement australian doubt pulled kooyong classic hip injury agassi serving set fellow american andy roddick decided bring premature match hip cramping continue agassi won australian times mri scan discover extent damage hip injury forced wimbledon news tear tightening body protecting issue comfortable feeling wait dealing pretty scary feeling feel worse disap…	1	2	2	1	5	0	5	1	7	1	1	5	4	7	14	1	15	6	10
Henman to face Saulnier test British number one Tim Henman will face France's Cyril Saulnier in the first round of next week's Australian Open. Greg Rusedski, the British number two, is in the same quarter of the draw and could face Andy Roddick in the second round if he beats Swede Jonas Bjorkman. Local favourite Lleyton Hewitt will meet France's Arnaud Clement, while defending champion and worl…	tennis	henman saulnier test british tim henman france cyril saulnier round week australian greg rusedski british quarter draw andy roddick round beats swede jonas bjorkman local favourite lleyton hewitt meet france arnaud clement defending champion roger federer fabrice santoro women top seed lindsay davenport drew spanish veteran conchita martinez henman sets defeat saulnier round french tough test mel…	1	2	2	1	5	0	5	1	7	1	1	1	6	7	14	5	15	4	7
Moya suffers shock loss Fifth seed Carlos Moya was the first big name to fall at the Australian Open as he went down to fellow Spaniard Guillermo Garcia-Lopez on Monday. Moya began the year with victory at the Chennai Open but looked out of sorts from the start in the Melbourne heat. Garcia-Lopez, ranked 106 in the world, dominated from the outset and withstood a third-set rally from Moya to hang…	tennis	moya suffers shock loss seed carlos moya fall australian fellow spaniard guillermo monday moya victory chennai looked sorts start melbourne heat ranked dominated outset withstood rally moya hang victory plays kevin kim lee round delighted victory grand slam match win life carlos players lot confidence feel beat players moya playing perfect preparation wrong champion andre agassi australian convin…	1	2	2	1	5	0	5	1	7	1	1	5	4	7	14	1	15	5	10
Clijsters hope on Aussie Open Kim Clijsters has denied reports that she has pulled out of January's Australian Open because of her persistent wrist injury. Open chief Paul McNamee had said: "Kim's wrist obviously isn't going to be rehabilitated." But her spokesman insisted she had simply delayed submitting her entry. "The doctors are assessing her injury on a weekly basis and if there is no risk …	tennis	clijsters hope aussie kim clijsters denied reports pulled january australian persistent wrist injury chief paul mcnamee kim wrist rehabilitated spokesman insisted simply delayed submitting entry doctors assessing injury weekly basis risk play risk stay absent wta entry list tournament january clijsters wild card requested clijsters ranked playing handful matches season belgian operation left wris…	1	2	2	1	5	0	5	1	7	1	1	1	6	7	14	5	15	4	7
Clijsters could play Aussie Open Kim Clijsters has denied reports that she has pulled out of January's Australian Open because of her persistent wrist injury. Open chief Paul McNamee had said: "Kim's wrist obviously isn't going to be rehabilitated." But her spokesman insisted she had simply delayed submitting her entry. "The doctors are assessing her injury on a weekly basis and if there is no ri…	tennis	clijsters play aussie kim clijsters denied reports pulled january australian persistent wrist injury chief paul mcnamee kim wrist rehabilitated spokesman insisted simply delayed submitting entry doctors assessing injury weekly basis risk play risk stay absent wta entry list tournament january clijsters wild card requested clijsters ranked playing handful matches season belgian operation left wris…	1	2	2	1	5	0	5	1	7	1	1	1	6	7	14	5	15	4	7
Edgy Agassi struggles past Dent Andre Agassi put in an erratic display before edging into the fourth round of the Australian Open with victory over Taylor Dent. The 34-year-old American, seeded eighth, made a poor start, dropping serve early on and later needing two chances to serve out the set. Having secured the lead, Agassi still failed to take control as both players forced a succession of br…	tennis	edgy agassi struggles dent andre agassi erratic display edging fourth round australian victory taylor dent american seeded eighth poor start dropping serve chances serve set secured lead agassi failed control players forced succession breaks agassi won wrapping win fourth seed survived injury scare battled mario ancic russian ankle game fourth set called treatment sign returned court wrap victory…	1	2	2	1	5	0	5	1	7	1	1	5	4	7	14	1	15	6	10
Roddick splits from coach Gilbert Andy Roddick has ended an 18-month association with coach Brad Gilbert which yielded the US Open title and saw the American become world number one. Roddick released a statement through the SFX Sports Group with the news but did not give a reason for the split. "The decision to not re-hire Brad Gilbert for the 2005 season is based on what I think is best for my g…	tennis	roddick splits coach gilbert andy roddick association coach brad gilbert yielded title american roddick released statement sfx sports news reason split decision brad gilbert season based game time roddick situation private matter coach player roddick won matches gilbert enjoyed time won grand slam event flushing meadows finished top atp tour rankings roddick slipped roger federer win majors seaso…	1	2	2	1	5	0	5	1	4	1	7	5	10	7	7	10	15	5	9
Roddick in talks over new coach Andy Roddick is reportedly close to confirming US Davis Cup assistant Dean Goldfine as his new coach. Roddick ended his 18-month partnership with Brad Gilbert on Monday, and Goldfine admits talks have taken place. "We had a really good conversation and we're on the same page in terms of what I expect from a player in commitment and what he wants," said Goldfine. "T…	tennis	roddick talks coach andy roddick reportedly close confirming davis cup assistant dean goldfine coach roddick partnership brad gilbert monday goldfine admits talks conversation terms expect player commitment goldfine reading lot qualities coach speaking told south florida newspaper goldfine standpoint smart cover bases andy relationship fit fit goldfine todd martin roddick close friend mardy fish …	1	2	2	1	5	0	5	1	4	1	7	5	10	7	7	10	15	5	9
Hewitt survives Nalbandian epic Home favourite Lleyton Hewitt came through a dramatic five-set battle with Argentine David Nalbandian to reach the Australian Open semi-finals. Hewitt looked to be cruising to victory after racing into a two-set lead. But Nalbandian broke his serve three times in both of the next two sets to set up a nailbiting decider. Hewitt eventually grabbed the vital break in …	tennis	hewitt survives nalbandian epic favourite lleyton hewitt dramatic battle argentine david nalbandian reach australian hewitt looked cruising victory racing lead nalbandian broke serve times sets set nailbiting decider hewitt eventually grabbed vital break game served win set meeting andy roddick winner match roger federer marat safin final ninth seed nalbandian sets win match indication hewitt dom…	1	2	2	1	5	0	5	1	7	1	1	5	4	7	14	1	15	17	10
Sydney return for Henin-Hardenne Olympic champion Justine Henin-Hardenne will return to action in January's Sydney International tournament. The Belgian has not competed since losing her top world ranking at the US Open in September, where she was beaten in the fourth round by Nadia Petrova. She took time out to shake off a virus but will defend her titles in Sydney and at the Australian Open. Wo…	tennis	sydney return olympic champion justine return action january sydney international tournament belgian competed losing top ranking september beaten fourth round nadia petrova time shake virus defend titles sydney australian women lindsay davenport french champion anastasia myskina compete event lleyton hewitt returns defend title carlos moya moya spain davis cup final hero win retire ankle injury s…	1	2	2	1	5	0	5	1	4	1	7	1	10	7	7	10	15	5	9
Koubek suspended after drugs test Stefan Koubek says he has been banned for three months by the International Tennis Federation (ITF) after testing positive for a banned substance. The world number 60 failed a routine drugs test at this year's French Open but now plans to lodge an appeal. Koubek believes an injection given to him by an Austrian doctor to treat a wrist injury is to blame for produ…	tennis	koubek suspended drugs test stefan koubek banned months international tennis federation itf testing positive banned substance failed routine drugs test french plans lodge appeal koubek believes injection austrian doctor treat wrist injury blame producing traces substance system acted correctly austrian statement koubek defeated britain greg rusedski decisive rubber davis cup september set start s…	1	2	2	1	3	0	3	2	4	8	7	3	10	11	7	10	13	2	9
Hewitt fights back to reach final Lleyton Hewitt kept his dream of an Australian Open title alive with a four-set win over Andy Roddick in Friday's second semi-final. The home favourite will face Marat Safin in Sunday's final after coming through 3-6 7-6 (7-3) 7-6 (7-4) 6-1. Hewitt fought back from a set down and trailed in both tie-breaks but would not be denied, thrilling the Melbourne crowd wi…	tennis	hewitt fights reach final lleyton hewitt dream australian title alive win andy roddick friday favourite marat safin sunday final coming hewitt fought set trailed denied thrilling melbourne crowd typically battling effort aiming australian winner mark edmondson hewitt australian final pat cash lost mats wilander huge challenge safin conqueror roger federer sets matches reason hewitt struggle fitne…	1	2	2	1	5	0	5	1	7	1	1	5	10	7	14	1	15	17	9
Officials respond in court row Australian tennis' top official has defended the Australian Open courts at Melbourne Park after criticism of the playing surface by Lleyton Hewitt. Hewitt said he had had a "gutful" of trying to persuade them to make the surface faster but Tennis Australia's Geoff Pollard rejected his comments. "We did ask for it to be made faster than last year and, to my knowledge…	tennis	officials respond court row australian tennis top official defended australian courts melbourne park criticism playing surface lleyton hewitt hewitt gutful persuade surface faster tennis australia geoff pollard rejected comments faster knowledge faster spent substantial amount money modifications faster hewitt fourth round melbourne attempts earlier surface worthy prestigious tournament play surf…	1	2	2	1	5	0	5	1	7	1	1	1	6	7	14	5	15	17	7
Williams battles to Aussie title Serena Williams staged a remarkable recovery to beat Lindsay Davenport and win her second Australian Open title. The 2003 champion claimed her seventh Grand Slam title, and her first since Wimbledon in 2003, 2-6 6-3 6-0. Williams had looked close to quitting with a rib injury when she left the court for treatment after five games. She quickly dropped the first set…	tennis	williams battles aussie title serena williams staged remarkable recovery beat lindsay davenport win australian title champion claimed seventh grand slam title wimbledon williams looked close quitting rib injury left court treatment games dropped set gear davenport game collapsed allowing williams title williams explained injury result lunging ball set lindsay wide backhand eventually goodness dav…	1	2	2	1	5	0	5	1	7	1	1	1	6	7	14	5	15	4	7
Safin cool on Wimbledon Newly-crowned Australian Open champion Marat Safin has ruled out any chance of winning Wimbledon in the future. After losing in round one last year, Safin said he had "given up" on Wimbledon and winning his second Grand Slam title has not changed his mind. "I'll play, but with no expectations. I feel like I can't waste my time, my energy on that surface," he said. "Some pe…	tennis	safin cool wimbledon australian champion marat safin ruled chance winning wimbledon future losing round safin wimbledon winning grand slam title changed mind play expectations feel waste time energy surface people play clay people play hard court play grass safin hopeful winning australian belief win grand slam titles relief grand slams hard basically love win couple chance continue coach peter l…	1	2	2	1	5	0	5	1	7	1	1	1	6	7	14	5	15	17	7
Safin plays down Wimbledon hopes Newly-crowned Australian Open champion Marat Safin has ruled out any chance of winning Wimbledon in the future. After losing in round one last year, Safin said he had "given up" on Wimbledon and winning his second Grand Slam title has not changed his mind. "I'll play, but with no expectations. I feel like I can't waste my time, my energy on that surface," he said.…	tennis	safin plays wimbledon hopes australian champion marat safin ruled chance winning wimbledon future losing round safin wimbledon winning grand slam title changed mind play expectations feel waste time energy surface people play clay people play hard court play grass safin hopeful winning australian belief win grand slam titles relief grand slams hard basically love win couple chance continue coach …	1	2	2	1	5	0	5	1	7	1	1	1	6	7	14	5	15	17	7
Nadal puts Spain 2-0 up Result: Nadal 6-7 (6/8) 6-2 7-6 (8/6) 6-2 Roddick Spain's Rafael Nadal beats Andy Roddick of the USA in the second singles match rubber of the 2004 Davis Cup final in Seville. Spain lead 1-0 after Carlos Moya beat Mardy Fish in straight sets in the opening match of the tie. Nadal holds his nerve and the crowd goes wild as Spain go 2-0 up in the tie. Roddick holds serve to …	tennis	nadal spain result nadal roddick spain rafael nadal beats andy roddick usa singles match rubber davis cup final seville spain lead carlos moya beat mardy fish straight sets match tie nadal holds nerve crowd wild spain tie roddick holds serve force nadal serve match american surely nadal roddick court consecutive earn break spaniard secures roddick teetering edge roddick gee clay surface toll game…	1	2	2	1	5	0	5	1	4	1	7	5	10	7	7	10	15	5	9
Henman & Murray claim LTA awards Tim Henman was named player of the year for 2004 by the Lawn Tennis Association at Wimbledon on Monday. The Briton was recognised for the best year of his career, which saw him reach the semis at the French and US Opens. Scotland's Andrew Murray was named young player of the year after winning the US Open juniors, as well as a Futures event in Italy. And world num…	tennis	henman murray claim lta awards tim henman named player lawn tennis association wimbledon monday briton recognised career reach semis french scotland andrew murray named player winning juniors futures event italy peter norfolk won disabled player claiming crown britain boys won team prize victory junior tennis event august henman start campaign kooyong event january field includes roger federer an…	1	2	2	1	5	0	5	1	7	1	1	5	4	7	14	1	15	6	10
Connors' rallying cry for British tennis "Do you have it in your heart? How much guts do you have? How much do you hate to lose?" These are the questions Jimmy Connors will be asking of Britain's brightest tennis hopes in the months, and possibly years, to come. The American legend swept into London on Thursday to announce a "long-term" relationship with the Lawn Tennis Association after spending…	tennis	connors rallying cry british tennis heart guts hate lose questions jimmy connors britain brightest tennis hopes months american legend swept london thursday relationship lawn tennis association spending days elite performance winter camp la manga epitomised phrase win lleyton hewitt born qualities hopes convey hits ball fine connors fine time teaching kids win connors offer services lta rival joh…	1	2	2	1	5	0	5	1	4	1	1	1	6	7	14	10	15	6	7
Roche 'turns down Federer offer' Australian tennis coach Tony Roche has turned down an approach from Roger Federer to be the world number one's new full-time coach, say reports. Melbourne's Herald-Sun said Roche, troubled by a hip complaint, did not want to travel full-time again. However, Roche is happy to work with the Swiss star on a casual basis and is helping him prepare for next month's def…	tennis	roche federer offer australian tennis coach tony roche approach roger federer coach reports melbourne roche troubled hip complaint travel roche happy swiss star casual basis helping prepare month defence australian crown federer coach splitting peter lundgren roche davis cup player australia won french reached wimbledon finals won wimbledon doubles titles john newcombe coached ivan lendl pat raft…	1	2	2	1	5	0	5	1	7	1	1	5	4	7	14	1	15	6	10
Federer joins all-time greats The last year has seen one player dominate men's tennis, and one country dominate the women's game. Roger Federer became the first man since Mats Wilander in 1988 to win three Grand Slams in one season. And after Anastasia Myskina became the first Russian woman to win a Grand Slam at the French Open, two more followed at Wimbledon and the US Open. Meanwhile, Briton T…	tennis	federer joins greats player dominate tennis country dominate women game roger federer mats wilander win grand slams season anastasia myskina russian woman win grand slam french wimbledon briton tim henman enjoyed greg rusedski fought superbly adversity federer holder wimbledon masters cup titles set conquering ground swiss sounded warning dominance australian ripped draw beating marat safin final…	1	2	2	1	5	0	5	1	7	1	1	1	6	7	14	5	15	4	7
Philippoussis doubt over Open bid Mark Philippoussis is almost certain to miss the Australian Open after suffering a groin injury during the Hopman Cup loss to the Netherlands. The 28-year-old suffered two tears to the adductor muscle and was unable to play in the deciding mixed doubles. He is now unlikely to be fit in time for the Australian Open which begins on 17 January in Melbourne. "He has …	tennis	philippoussis doubt bid mark philippoussis australian suffering groin injury hopman cup loss netherlands suffered tears adductor muscle unable play deciding mixed doubles fit time australian january melbourne strengthen cope repetitive days tennis hopman cup doctor hamish osborne opinion days row inside weeks injury common australian rules football fit footballer weeks recover mark injury austral…	1	2	2	1	5	0	5	1	7	1	1	1	6	7	14	5	15	4	7
Slovakia reach Hopman Cup final Slovakia will play Argentina in the final of the Hopman Cup after beating Group B rivals the Netherlands 3-0. Daniela Hantuchova defeated Michaella Krajicek 6-4 6-2 to give the Slovaks the perfect start before Dutchman Peter Wessels retired against Dominik Hrbaty. Wessels was unable to compete in the mixed doubles but Slovakia had already booked their place in the …	tennis	slovakia reach hopman cup final slovakia play argentina final hopman cup beating rivals netherlands daniela hantuchova defeated michaella krajicek slovaks perfect start dutchman peter wessels retired dominik hrbaty wessels unable compete mixed doubles slovakia booked final running argentina claimed top spot wins matches match united defeated australia meghann shaughnessy lost match alicia molik j…	1	2	2	1	5	0	5	1	7	1	1	1	6	7	14	5	15	4	7
Dent continues Adelaide progress American Taylor Dent reached the final of the Australian hardcourt event in Adelaide with a crushing 6-1 6-1 win over Argentine Juan Ignacio Chela. Dent will meet Swede Joachim Johansson on Sunday after the second seed survived a tense tie-break to defeat Belgium's Olivier Rochus 6-1 7-6 (7/5). Johansson, the boyfriend of Lleyton Hewitt's sister Jaslyn, received s…	tennis	dent continues adelaide progress american taylor dent reached final australian hardcourt event adelaide crushing win argentine juan ignacio chela dent meet swede joachim johansson sunday seed survived tense defeat belgium olivier rochus johansson boyfriend lleyton hewitt sister jaslyn received strong crowd support saturday feels jaslyn lives johansson rochus leading set tiebreak concentration ruf…	1	2	2	1	5	0	5	1	7	1	1	5	4	7	14	1	15	17	10
Moya sidesteps Davis Cup in 2005 Carlos Moya has chosen not to help Spain try and defend the Davis Cup crown they won in Seville in November. Moya led Spain to victory over the USA but wants to focus on the Grand Slams in 2005, although insists he will return to the Davis Cup in 2006. "After two years of total commitment with the Davis Cup team... I have taken this difficult decision to concentra…	tennis	moya sidesteps davis cup carlos moya chosen spain defend davis cup crown won seville november moya led spain victory usa focus grand slams insists return davis cup total commitment davis cup team difficult decision concentrate regular circuit moya season count french champion determined impact major events spending top age set tough goals professional career season objectives specific dates tourn…	1	2	2	1	5	0	5	1	4	1	7	5	10	7	7	10	15	5	9
Henman decides to quit Davis Cup Tim Henman has retired from Great Britain's Davis Cup team. The 30-year-old, who made his Davis Cup debut in 1994, is now set to fully focus on the ATP Tour and on winning his first Grand Slam event. "I've made no secret of the fact that representing Great Britain has always been a top priority for me throughout my career," Henman told his website. Captain Jeremy …	tennis	henman decides quit davis cup tim henman retired britain davis cup team davis cup debut set focus atp tour winning grand slam event secret representing britain top priority career henman told website captain jeremy bates touted alex bogdanovic andrew murray replacements veteran henman britain bid davis cup success tie israel march wo playing jeremy lta future draw experience hope british players …	1	2	2	1	5	0	5	1	4	1	7	5	10	7	7	10	15	5	9
Ivanovic seals Canberra victory Serbia's Ana Ivanovic captured her first WTA title with a straight-sets victory over Hungarian Melinda Czink in the final of the Canberra Classic. The 17-year-old took 83 minutes to take the match 7-5 6-1. Ivanovic beat Czink in the last round of qualifying but the Hungarian made the main draw as a lucky loser after Katarina Srebotnik withdrew injured. Ivanovic sai…	tennis	ivanovic seals canberra victory serbia ana ivanovic captured wta title victory hungarian melinda czink final canberra classic minutes match ivanovic beat czink round qualifying hungarian main draw lucky loser katarina srebotnik withdrew injured ivanovic nervous pulled wrong junior wimbledon finalist wta title win energy practice improve ivanovic play seed iveta benesova czech republic australian …	1	2	2	1	5	0	5	1	7	1	1	1	6	7	14	5	15	17	7
Minister digs in over doping row The Belgian sports minister at the centre of the Svetlana Kuznetsova doping row says he will not apologise for making allegations against her. Claude Eerdekens claims the US Open champion tested positive for ephedrine at an exhibition event last month. Criticised for making the announcement, he said: "I will never apologise. This product is banned and it's up to h…	tennis	minister digs doping row belgian sports minister centre svetlana kuznetsova doping row apologise allegations claude eerdekens claims champion tested positive ephedrine exhibition event month criticised announcement apologise product banned explain kuznetsova stimulant cold remedy russian wrong medicine event women tennis association cleared kuznetsova offence drug banned competition eerdekens sta…	1	2	2	3	5	0	5	1	7	1	1	1	6	7	14	5	13	4	7
Safin relieved at Aussie recovery Marat Safin admitted he thought he was suffering another Australian Open final nightmare when he lost the opening set to Lleyton Hewitt. The Russian, who lost the 2002 and 2004 finals, fought back brilliantly to win 1-6 6-3 6-4 6-4. "I was nervous and I couldn't play tennis," said Safin. "He started really well. He wasn't as nervous as I was because I was thinkin…	tennis	safin relieved aussie recovery marat safin admitted suffering australian final nightmare lost set lleyton hewitt russian lost finals fought brilliantly win nervous play tennis safin started nervous thinking finals played successful deal pressure final tight win play tennis huge experience won grand slam titles won titles player deals pressure set safin played tennis reel games control match set s…	1	2	2	1	5	0	5	1	7	1	1	1	6	7	14	5	15	17	7
Veteran Martinez wins Thai title Conchita Martinez won her first title in almost five years with victory over Anna-Lena Groenefeld at the Volvo Women's Open in Pattaya, Thailand. The 32-year-old Spaniard came through 6-3 3-6 6-3 for her first title since Berlin in 2000. "It feels really good," said Martinez, who is playing her last season on the Tour. "To come through like that in an important ma…	tennis	veteran martinez wins thai title conchita martinez won title victory groenefeld volvo women pattaya thailand spaniard title berlin feels martinez playing season tour match feels groenefeld powerful player match opponent relentless accuracy final experience german played match tough match stay week	1	2	2	1	5	0	5	1	7	1	1	1	6	7	14	5	15	4	7
Soderling wins tense Milan final Fifth seed Robin Soderling took the Milan Indoors title with a dramatic win over Radek Stepanek in Sunday's final. The 20-year-old Swede edged the final set tie-break for a 6-3 6-7 (2-7) 7-6 (7-5) victory and his second tour title after winning in Lyon last year. "I'm delighted to have won against such a good opponent in a tournament of this importance," said Sode…	tennis	soderling wins tense milan final seed robin soderling milan indoors title dramatic win radek stepanek sunday final swede edged final set victory tour title winning lyon delighted won opponent tournament soderling form service playing synthetic surface soderling shrugged nervous start set set change approach fourth seed stepanek set paid dividends soderling superior power proved	1	2	2	1	5	0	5	1	7	1	1	5	4	7	14	1	15	17	10
Rusedski forced out in Marseille Greg Rusedski was forced to withdraw from the Open 13 in Marseille on Thursday with a rib injury. The British number two had been scheduled to play qualifier Sebastien de Chaunac, who beat world number five Guillermo Coria 6-4 7-5 in round one. But Rusedski was unable to take to the court because of a problem with the left-hand side of his rib-cage. American Taylo…	tennis	rusedski forced marseille greg rusedski forced withdraw marseille thursday rib injury british scheduled play qualifier sebastien de chaunac beat guillermo coria round rusedski unable court american taylor dent caused shock victory seed david nalbandian seed joachim johansson beating frenchman gilles simon match day sixth seed feliciano lopez defeated ivo karlovic wins slovakia karol beck croatian…	1	2	2	1	5	0	5	1	7	1	1	5	4	7	14	1	15	6	10
Big guns ease through in San Jose Top-seeded Americans Andy Roddick and Andre Agassi survived minor scares to reach the last eight of the SAP Open. Agassi endured early problems against left-handed Dane Kenneth Carlsen before sealing a 7-5 6-1 victory. And world number three Roddick dropped a set to Korean player Hyung-Taik Lee, before pulling out a 6-3 3-6 6-2 win in San Jose, California. Sevent…	tennis	guns ease san jose americans andy roddick andre agassi survived minor scares reach sap agassi endured dane kenneth carlsen sealing victory roddick dropped set korean player lee pulling win san jose california seventh seed jurgen melzer xavier malisse winner delray beach week frenchman cyril saulnier fired aces secure win czech qualifier tomas zib roddick broke racket frustration game set unimpres…	1	2	2	1	5	0	5	1	7	1	7	5	4	7	7	1	15	6	10
Almagro continues Spanish surge Unseeded Nicolas Almagro became the fifth Spaniard to reach the last eight at the Buenos Aires Open, ousting eighth seed Mariano Zabaleta. He showed admirable resolve to win a rain-affected match 6-7 6-4 6-4. Compatriot and seventh seed Rafael Nadal also reached the last eight, beating Italian Potito Starace 6-1 6-3. Nadal, playing in the outdoor clay event for the…	tennis	almagro continues spanish surge unseeded nicolas almagro spaniard reach buenos aires ousting eighth seed mariano zabaleta admirable resolve win match compatriot seventh seed rafael nadal reached beating italian potito starace nadal playing outdoor clay event time hit powerful forehands oust starace match delayed hour rain rain spanish teenager nadal luckily pace match play gaston gaudio beat unse…	1	2	2	1	5	0	5	1	7	1	1	5	4	7	14	1	15	6	10
Melzer shocks Agassi in San Jose Second seed Andre Agassi suffered a comprehensive defeat by Jurgen Melzer in the quarter-finals of the SAP Open. Agassi was often bamboozled by the Austrian's drop shots in San Jose, losing 6-3 6-1. Defending champion and top seed Andy Roddick rallied to beat Sweden's Thomas Enqvist 3-6 7-6 (8-6) 7-5. But unseeded Cyril Saulnier beat the fourth seed Vincent Spadea…	tennis	melzer shocks agassi san jose seed andre agassi suffered comprehensive defeat jurgen melzer sap agassi bamboozled austrian drop shots san jose losing defending champion top seed andy roddick rallied beat sweden thomas enqvist unseeded cyril saulnier beat fourth seed vincent spadea tommy haas overcame eighth seed max mirnyi melzer beaten agassi meetings game plan executed perfectly tough play andr…	1	2	2	1	5	0	5	1	7	1	7	5	4	7	14	1	15	6	10
Mirza makes Indian tennis history Teenager Sania Mirza completed a superb week at the Hyderabad Open by becoming the first Indian in history to win a WTA singles title. In front of a delirious home crowd, the 18-year-old battled past Alyona Bondarenko of the Ukraine 6-4 5-7 6-3. Mirza, ranked 134 in the world, sunk to her knees in celebration after serving out the match against Bondarenko. "It is…	tennis	mirza indian tennis history teenager sania mirza completed superb week hyderabad indian history win wta singles title front delirious crowd battled alyona bondarenko ukraine mirza ranked sunk knees celebration serving match bondarenko moment career effort win hope coming days win tournament badly hometown australian january mirza indian woman reach round grand slam losing eventual champion serena…	1	2	2	1	5	0	5	1	7	1	1	1	6	7	14	5	15	4	7
Roddick to face Saulnier in final Andy Roddick will play Cyril Saulnier in the final of the SAP Open in San Jose on Sunday. The American top seed and defending champion overcame Germany's Tommy Haas, the third seed, 7-6 (7-3) 6-3. "I was feeling horrible earlier in the week," Roddick said. "I thought tonight was a step in the right direction." Saulnier battled to a 6-7 (3-7) 6-3 6-3 win over seve…	tennis	roddick saulnier final andy roddick play cyril saulnier final sap san jose sunday american top seed defending champion overcame germany tommy haas seed feeling horrible earlier week roddick tonight step direction saulnier battled win seventh seed jurgen melzer twisted ankle set roddick won broken start set broke straight broke haas lead extremely frustrating chances player admitted haas rushed ba…	1	2	2	1	5	0	5	1	4	1	7	5	4	7	7	1	15	5	10
Australia miss Molik for Fed Cup Australia will be without their leading player Alicia Molik for the Fed Cup round robin matches in India in April. The world number 10 was not included in new captain John Alexander's squad as she is focusing on her singles career. "Alicia has a real opportunity to achieve a number one world ranking and has a particular schedule designed to achieve that," Alexande…	tennis	australia molik fed cup australia leading player alicia molik fed cup round robin matches india april included captain john alexander squad focusing singles career alicia real opportunity achieve ranking schedule designed achieve alexander explained samantha stosur nicole pratt evie dominikovic bryanne stewart form squad alexander insisted team molik request play fed cup awkward geographical loca…	1	0	3	1	4	6	7	6	1	2	4	8	12	9	3	10	2	18	9
Clijsters sets up Venus match-up Kim Clijsters continued her comeback from a wrist injury with a 7-5 6-7 6-1 win over Russia's Nadia Petrova in round two of the Antwerp Diamond Games. The Belgian will meet fellow former world number one Venus Williams in the quarter-finals after the American swept past France's Virginie Razzano 6-3 6-0. Clijsters, sidelined since October, edged a high-quality fir…	tennis	clijsters sets venus kim clijsters continued comeback wrist injury win russia nadia petrova round antwerp diamond games belgian meet fellow venus williams american swept france virginie razzano clijsters sidelined october edged set petrova hit tiebreak clijsters pulled decider breaking times fine wrist clijsters backhand backhand cross rallies slicing enjoyed backhand intention wearing petrova re…	1	2	2	1	5	0	5	1	7	1	1	1	6	7	14	5	15	4	7
Injured Roddick quits in Memphis Andy Roddick has pulled out of his semi-final at the RMK Championships in Memphis after spraining his left ankle. The American top seed was was supposed to face Dane Kenneth Carlsen, who now advances to the final against eighth seed Max Mirnyi of Belarus. He came through his semi-final against German second seed Tommy Haas 7-5 6-3. Roddick, the 2003 US Open champi…	tennis	injured roddick quits memphis andy roddick pulled rmk championships memphis spraining left ankle american top seed supposed dane kenneth carlsen advances final eighth seed max mirnyi belarus german seed tommy haas roddick champion hurt win friday intensive treatment ankle avail attempted loosen foot jogging saturday hit couple balls move happen roddick decided pass chance win tour title weeks hea…	1	2	2	1	5	0	5	1	4	1	7	5	10	7	7	10	15	5	9
Henman hopes ended in Dubai rain Third seed Tim Henman slumped to a straight sets defeat in his rain-interrupted Dubai Championships quarter-final against Ivan Ljubicic. The Croatian eighth seed booked his place in the last four with a 7-5 6-4 victory over the British number one. Henman had looked on course to level the match after going 2-0 up in the second set, but his progress was halted as th…	tennis	henman hopes dubai rain seed tim henman slumped straight sets defeat dubai championships ivan ljubicic croatian eighth seed booked victory british henman looked level match set progress halted rain intervened ljubicic hit break seal fourth straight win henman earlier day spanish seed tommy robredo secured beat nicolas kiefer germany rain roger federer mikhail youzhny andre agassi nikolay davydenk…	1	2	2	1	5	0	5	1	7	1	1	5	4	7	14	1	15	6	10
Agassi into second round in Dubai Fourth seed Andre Agassi beat Radek Stepanek 6-4 7-5 in the first round of the Dubai Tennis Championships. The 34-year-old, moving well despite a hip problem which needed an injection, served well and won 80% of his first serve and 76% of his second. But the American could not break the Czech Stepanek until the final game of the first set and in the second he had…	tennis	agassi round dubai fourth seed andre agassi beat radek stepanek round dubai tennis championships moving hip injection served won serve american break czech stepanek final game set fight losing serve agassi appearance event received standing ovation days dubai waited time apologise late winners included spaniards juan carlos ferrero tommy robredo dominik hrbaty slovakia germany rainer schuettler f…	1	2	2	1	5	0	5	1	7	1	1	5	4	7	14	1	15	6	10
Mauresmo fights back to win title World number two Amelie Mauresmo came from a set down to beat Venus Williams and win the Diamond Games in Antwerp. Mauresmo, who lost to Dinara Safina in the final of the Paris Indoor Open last week, beat the third seed 4-6 7-5 6-4 for her first title of the season. The Frenchwoman produced some superb volleys in the final set and claimed victory on her fifth mat…	tennis	mauresmo fights win title amelie mauresmo set beat venus williams win diamond games antwerp mauresmo lost dinara safina final paris indoor week beat seed title season frenchwoman produced superb volleys final set claimed victory match hours minutes final tournament happy quality game week final result coach williams seeking title antwerp won previous visits defeat tournaments title drought career…	1	2	2	1	5	0	5	1	7	1	1	1	6	7	14	5	15	4	7
Federer wins title in Rotterdam World number one Roger Federer won the World Indoor Tournament in Rotterdam with a battling 5-7 7-5 7-6 victory over Ivan Ljubicic on Sunday. The Swiss star was made to work hard by Ljubicic, who also lost to Federer in last month's final in Doha. The Croatian broke his serve for the first time in the tournament to take the first set, but Federer hit back and took …	tennis	federer wins title rotterdam roger federer won indoor tournament rotterdam battling victory ivan ljubicic sunday swiss star hard ljubicic lost federer month final doha croatian broke serve time tournament set federer hit decider won finals triumphing hours minutes federer close happy fought crucial victory rest season fight hard happened played shocking game broken advantage broke love game haunt…	1	2	2	1	5	0	5	1	7	1	1	5	4	7	14	1	15	6	10
GB players warned over security Britain's Davis Cup players have been warned not to go out of their Tel Aviv hotel unaccompanied ahead of the weekend's tie against Israel. A suicide bombing in a nightclub in the city on Friday claimed four victims. "We spoke about the bomb and we were told that we must not leave the hotel on our own," Andrew Murray told the Daily Telegraph. "Jeremy (Bates, GB cap…	tennis	gb players warned security britain davis cup players warned tel aviv hotel unaccompanied ahead weekend tie israel suicide bombing nightclub city friday claimed victims spoke bomb told leave hotel andrew murray told daily telegraph jeremy bates gb captain told careful hotel stupid murray insisted team includes greg rusedski arvind parmar david sherwood reserve alex bogdanovic concentrate task ahea…	1	2	2	0	1	5	1	5	4	3	7	6	10	14	7	10	10	5	9
Sharapova overcomes tough Molik Wimbledon champion Maria Sharapova recovered from losing the opening set to win the final of the Qatar Open. The second seed beat fourth-seeded Australian Alicia Molik 4-6 6-1 6-4 for her second title of the year. Molik, who had overcome top seed Amelie Mauresmo in Friday's semi-final, broke Sharapova in the third game of a first set she went on to win. But Sharapo…	tennis	sharapova overcomes tough molik wimbledon champion maria sharapova recovered losing set win final qatar seed beat australian alicia molik title molik overcome top seed amelie mauresmo friday broke sharapova game set win sharapova recovered build healthy lead set looked molik game fall sharapova broke game decider lead molik stayed touch sharapova held serve finished match ace saving break game sh…	1	2	2	1	5	0	5	1	7	1	1	1	6	7	14	5	15	4	7
Hodgson shoulders England blame Fly-half Charlie Hodgson admitted his wayward kicking played a big part in England's 18-17 defeat to France. Hodgson failed to convert three penalties and also missed a relatively easy drop goal attempt which would have given England a late win. "I'm very disappointed with the result and with my myself," Hodgson said. "It is very hard to take but it's something I w…	rugby	hodgson shoulders england blame charlie hodgson admitted wayward kicking played england defeat france hodgson failed convert penalties missed easy drop goal attempt england late win disappointed result hodgson hard stronger training happen hodgson revealed olly barkley penalties range centre convert opportunities drop goal late strike hit boot missed disappointing recover andy robinson kicking sq…	0	0	0	2	0	4	4	7	0	0	0	0	0	0	0	14	0	0	17
Vickery out of Six Nations England tight-head prop Phil Vickery has been ruled out of the rest of the 2005 RBS Six Nations after breaking a bone in his right forearm. Vickery was injured as his club side, Gloucester, beat Bath 17-16 in the West country derby on Saturday. He could be joined on the sidelines by Bath centre Olly Barkley, who sat out the derby due to a leg injury. Barkley will have a…	rugby	vickery nations england prop phil vickery ruled rest rbs nations breaking bone forearm vickery injured club gloucester beat bath west country derby saturday joined sidelines bath centre olly barkley sat derby leg injury barkley scan sunday england trip nations leaders ireland weekend news blow coach andy robinson lose matches nations robinson cup winners jonny wilkinson greenwood mike tindall ric…	0	0	0	2	0	4	4	7	0	0	0	0	0	0	0	14	0	0	17
Yachvili savours France comeback France scrum-half Dimitri Yachvili praised his team after they fought back to beat England 18-17 in the Six Nations clash at Twickenham. Yachvili kicked all of France's points as they staged a second-half revival. "We didn't play last week against Scotland and we didn't play in the first half against England," he said. "But we're very proud to beat England at Twic…	rugby	yachvili savours france comeback france dimitri yachvili praised team fought beat england nations clash twickenham yachvili kicked france staged revival play week scotland play half england beat england twickenham defending half pressure yachvili admitted erratic kicking england charlie hodgson olly barkley missed penalties drop goal chance decisive kicking hard mentally france captain fabien pel…	0	0	0	2	0	4	4	7	0	0	0	0	0	0	0	4	0	0	17
Laporte tinkers with team France coach Bernard Laporte has made four changes to the starting line-up that beat England for Saturday's Six Nations clash with Wales. He opted for Yannick Nyanga in the back row instead of Grand Slam winner Imanol Harinordoquy, who is back in the squad. Other changes see Julien Laharrague win his first cap at full-back, Aurelien Rougerie return after injury on the wi…	rugby	laporte tinkers team france coach bernard laporte starting beat england saturday nations clash wales opted yannick nyanga row grand slam winner imanol harinordoquy squad julien laharrague win cap aurelien rougerie return injury wing yannick jauzion centre laporte resisted fan pressure start frederic michalak dependable yann delaigue jersey clamours flair michalak laharrague chance playing wing cl…	0	0	0	2	0	4	4	7	0	7	8	11	11	8	13	4	17	15	0
Lewsey puzzle over disallowed try England's Josh Lewsey has claimed he was denied a late try in his side's Six Nations loss to Ireland. The Wasps wing insisted he grounded the ball when he was bundled over the line and said referee Jonathan Kaplan had made a wrong decision. "I'm positive I touched the ball down over the line," Lewsey told BBC Sport. "It certainly wasn't a turnover. "I was driven …	rugby	lewsey puzzle disallowed england josh lewsey claimed denied late nations loss ireland wasps wing insisted grounded ball bundled referee jonathan kaplan wrong decision positive touched ball lewsey told bbc sport turnover driven ball ground whistle ball lewsey irish players scooped whistle surprise referee turnover concerned incident mark cueto effort charlie hodgson kick led looked key elements ga…	0	0	0	2	0	4	4	7	0	0	0	0	0	0	0	3	4	0	17
Fuming Robinson blasts officials England coach Andy Robinson insisted he was "livid" after his side were denied two tries in Sunday's 19-13 Six Nations loss to Ireland in Dublin. Mark Cueto's first-half effort was ruled out for offside before the referee spurned TV replays when England crashed over in the dying minutes. "[I'm] absolutely spitting. I'm livid. There's two tries we've been cost," Ro…	rugby	fuming robinson blasts officials england coach andy robinson insisted livid denied sunday nations loss ireland dublin mark cueto effort ruled offside referee spurned tv replays england crashed dying minutes absolutely spitting livid cost robinson told bbc sport technology south african referee jonathan kaplan ruled cueto ahead charlie hodgson hoisted kick sale wing gather kaplan declined chance c…	0	0	0	2	0	4	4	7	0	0	0	0	0	0	0	14	4	0	17
O'Gara revels in Ireland victory Ireland fly-half Ronan O'Gara hailed his side's 19-13 victory over England as a "special" win. The Munster number 10 kicked a total of 14 points, including two drop goals, to help keep alive their Grand Slam hopes. He told BBC Sport: "We made hard work of it but it's still special to beat England. "I had three chances to win the game but didn't. We have work to do…	rugby	revels ireland victory ireland ronan hailed victory england special win munster kicked total including drop goals alive grand slam hopes told bbc sport hard special beat england chances win game victory england lightly ireland hooker shane byrne echoed comments admitted game england outing nations byrne hard game team hard stick defensive pattern trust trust round fantastic ireland captain brian …	0	0	0	2	0	4	4	7	0	0	0	0	0	0	0	14	0	0	17
Thomas out of Six Nations Wales captain Gareth Thomas has been ruled out of the rest of the Six Nations with a broken thumb. The full-back will have surgery on Monday after fracturing his thumb in the 24-18 win over France on Saturday. But Welsh legend Phil Bennett insisted Wales can cope without Thomas as they chase a first Grand Slam in 27 years. Bennett told BBC Sport: "Such is the spirit in t…	rugby	thomas nations wales captain gareth thomas ruled rest nations broken thumb surgery monday fracturing thumb win france saturday welsh legend phil bennett insisted wales cope thomas chase grand slam bennett told bbc sport spirit camp kevin morgan rhys williams wing carry thomas match scotland march promises huge encounter irish days bennett setback captain leads front boys love thomas replaced will…	0	0	0	2	0	4	4	7	0	7	8	11	11	8	13	15	17	15	0
Wales coach elated with win Mike Ruddock paid tribute to his Wales side after they came from 15-6 down to beat France 24-18 in the Six Nations. "After going two tries down in 12 minutes we had to show character," said the national team coach. "I didn't have to tell them anything at half-time because those players have stared down the barrel of a gun before. "They decided they didn't want to do th…	rugby	wales coach elated win mike ruddock paid tribute wales beat france nations minutes character national team coach players stared barrel gun decided fighting team effort character stephen jones kicked penalties drop goal conversion ecstatic win stade de france special moment ago win single game nations happy camp hard squad welshman hard matches happy start double scorer martyn williams keen talk g…	0	0	0	2	0	4	4	7	0	7	8	11	11	8	13	15	17	15	0
Newcastle 27-27 Gloucester Newcastle centre Mathew Tait answered his critics as he scored one try and made another, but he could not stop Gloucester grabbing a draw. The Falcons were 22-6 down at the break before Tait, recently axed by England after just one Six Nations outing, inspired his side to a 27-22 lead. A last-gasp touchdown from Luke Narraway pulled the visitors level. But Gloucester mi…	rugby	newcastle gloucester newcastle centre mathew tait answered critics scored gloucester grabbing draw falcons break tait axed england nations outing inspired lead touchdown luke narraway pulled visitors level gloucester missed victory henry paul fluffed conversion seti kiole denied late newcastle couple chances start half corner failed count joe shaw dave walder released mark mayerholfer black broke…	0	0	0	2	0	4	4	7	0	0	0	0	0	0	0	3	0	0	17
London Irish 19-33 Wasps Wasps made light of the absence of several internationals to sink London Irish with a trio of second-half tries. Rob Hoadley returned to haunt his old club at the Madejski Stadium, scoring the opening try in the 43rd minute. Tom Voyce powered through the Irish defence for Wasps' second try before Richard Birkett went over unchallenged. Mark van Gisbergen added 18 points. …	rugby	london irish wasps wasps light absence internationals sink london irish trio rob hoadley returned haunt club madejski stadium scoring minute tom voyce powered irish defence wasps richard birkett unchallenged mark van gisbergen irish replied penalties mark mapletoft drop goal scott staniforth consolation barry everitt replaced mapletoft late game conversion fourth premiership player reach joins jo…	0	0	0	2	0	4	4	7	0	0	0	0	0	0	0	3	7	12	15
Murray returns to Scotland fold Euan Murray has been named in the Scotland training squad after an eight-week ban, ahead of Saturday's Six Nations match with Ireland. The Glasgow forward's ban for stamping ended on 2 February. "I'm just happy to be back playing and be involved with the squad," said Murray on Monday. "Hopefully I can get a couple of games under my belt and I might have a chance of…	rugby	murray returns scotland fold euan murray named scotland training squad ban ahead saturday nations match ireland glasgow forward ban stamping february happy playing involved squad murray monday couple games belt chance playing nations glad mike blair edinburgh rugby andy craig glasgow rugby chris cusiter borders simon danielli borders marcus di rollo edinburgh rugby phil godman edinburgh rugby cal…	0	0	0	2	0	4	4	7	0	0	0	0	0	10	13	14	7	13	17
Fear will help France - Laporte France coach Bernard Laporte believes his team will be scared going into their game with England on Sunday, but claims it will work in their favour. The French turned in a stuttering performance as they limped to a 16-9 win against Scotland in the opening match of the Six Nations on Saturday. "We will go to Twickenham with a little fear and it'll give us a boost," …	rugby	fear france laporte france coach bernard laporte believes team scared game england sunday claims favour french stuttering performance limped win scotland match nations saturday twickenham fear boost french coach favourites perpignan centre granclaude delighted received france squad incredible youngster expecting playing france team dream true england twickenham nations laporte starting wednesday …	0	0	0	2	0	4	4	7	0	7	8	11	11	8	13	4	17	15	0
Davies favours Gloucester future Wales hooker Mefin Davies is likely to stay with English side Gloucester despite reported interest from the Neath-Swansea Ospreys. BBC Wales understands the Ospreys are interested in the 32-year-old, but that he would prefer to stay where he is. Davies, one of the stars of Saturday's RBS Six Nations win over England, is only on a year contract at Kingsholm. But th…	rugby	davies favours gloucester future wales hooker mefin davies stay english gloucester reported ospreys bbc wales understands ospreys prefer stay davies stars saturday rbs nations win england contract kingsholm hooker proved worth zurich premiership deal season summer demise celtic warriors region left davies cold forced contract neath rfc match time ospreys request wales management admitted move glo…	0	0	0	2	0	4	4	7	0	7	8	11	11	8	13	15	17	15	0
Ref stands by Scotland decisions The referee from Saturday's France v Scotland Six Nations match has defended the officials' handling of the game after criticism by Matt Williams. The Scotland coach said his side were robbed of victory by poor decisions made by the officials. But Nigel Williams said: "I'm satisfied the game was handled correctly." Meanwhile, Matt Williams will not be punished by …	rugby	stands scotland decisions referee saturday france scotland nations match defended officials handling game criticism matt williams scotland coach robbed victory poor decisions officials nigel williams satisfied game handled correctly matt williams punished scottish rugby union allegedly bad language comments officials denies furious decisions denied famous victory nigel williams told scottish dail…	0	0	0	2	0	4	4	7	0	7	8	11	11	8	13	15	4	4	0
Robinson ready for difficult task England coach Andy Robinson faces the first major test of his tenure as he tries to get back to winning ways after the Six Nations defeat by Wales. Robinson is likely to make changes in the back row and centre after the 11-9 loss as he contemplates Sunday's set-to with France at Twickenham. Lewis Moody and Martin Corry could both return after missing the game wit…	rugby	robinson ready difficult task england coach andy robinson major test tenure winning nations defeat wales robinson row centre loss contemplates sunday france twickenham lewis moody martin corry return missing game hamstring shoulder midfield pairing mathew tait jamie noon threat olly barkley allowed england generate field position kicking game replacing debutant tait hour bath start france tait no…	0	0	0	2	0	4	4	7	0	0	0	0	0	0	0	14	0	0	17
Bell set for England debut Bath prop Duncan Bell has been added to England's 30-man squad to face Ireland in the RBS Six Nations. And with Phil Vickery sidelined for at least six weeks with a broken arm and Julian White out with a neck injury, Bell could make his England debut. Bell, 30, had set his sights on an international career with Wales. But last December, the International Rugby Board con…	rugby	bell set england debut bath prop duncan bell england squad ireland rbs nations phil vickery sidelined weeks broken arm julian white neck injury bell england debut bell set sights international career wales december international rugby board confirmed eligible england travelled tour england coach andy robinson gamble call inexperienced sale sharks prop andrew sheridan front row sheridan favours lo…	0	0	0	2	0	4	4	7	0	0	0	0	0	0	0	14	0	0	17
O'Sullivan quick to hail Italians Ireland coach Eddie O'Sullivan heaped praise on Italy after seeing his side stutter to a 28-17 victory in Rome. "It was a hell of a tough game," said O'Sullivan. "We struggled in the first half because we hadn't the football. "Italy played really well. They handled the ball well in terms of kicking it, if that's not an oxymoron. "We said before the game that it m…	rugby	quick hail italians ireland coach eddie heaped praise italy stutter victory rome hell tough game struggled half football italy played handled ball terms kicking oxymoron game minutes game won ireland struggled cope italy fierce start indebted skipper brian set geordan murphy peter stringer attack italian half minutes return possessions half scored half spending time half peter stringer glad irela…	0	0	0	2	0	4	4	7	0	7	8	11	11	8	13	3	7	12	15
Italy 17-28 Ireland Two moments of magic from Brian O'Driscoll guided Ireland to a workmanlike victory against Italy. A pair of classic outside breaks from the Ireland captain set up tries for Geordan Murphy and Peter Stringer. Italy led 9-8 early in the second half but Stringer's try gave Ireland a lead they never lost. The hosts cut the gap to 18-12 with 10 minutes left and nearly scored throug…	rugby	italy ireland moments magic brian guided ireland workmanlike victory italy pair classic breaks ireland captain set geordan murphy peter stringer italy led half stringer ireland lead lost hosts cut gap minutes left scored ludovico nitoglia denis hickie ensured irish victory italy flying blocks lead luciano orquera penalty minutes hosts missed kickable penalties ireland drew level ronan penalty mid…	0	0	0	2	0	4	4	7	0	7	8	11	11	8	13	3	7	12	15
Jones happy with Henson heroics Wales fly-half Stephen Jones admitted he was happy to hand Gavin Henson responsibility for taking the match-winning kick against England. Jones had missed three earlier shots at goal when Wales, 9-8 down, were awarded a long-range penalty with four minutes left in Cardiff. "I knew the percentages of Gavin reaching it were far higher than me," Jones said. "When he s…	rugby	jones happy henson heroics wales stephen jones admitted happy hand gavin henson responsibility kick england jones missed earlier shots goal wales awarded penalty minutes left cardiff percentages gavin reaching jones jones effort fall whisker crossbar hour charlie hodgson england front minutes left looked struggle jones gareth thomas wales captain touch range gavin phenomenal distance confident fa…	0	0	0	2	0	4	4	7	0	7	8	11	11	8	13	15	17	15	0
Double injury blow strikes Wales Wales centre Sonny Parker and number eight Ryan Jones will miss Saturday's game with Italy because of injury. Parker has not recovered from a trapped nerve in his neck that kept him out of the win over England, and Tom Shanklin is expected to continue at centre. Jones damaged his collar bone after coming on as a replacement against England and joins flanker Colin …	rugby	double injury blow strikes wales wales centre sonny parker ryan jones saturday game italy injury parker recovered trapped nerve neck win england tom shanklin expected continue centre jones damaged collar bone coming replacement england joins flanker colin charvis foot injury sidelines mike ruddock gavin henson kicker rome centre wales hero nations win england landing huge late penalty wide clinch…	0	0	0	2	0	4	4	7	0	7	8	11	11	8	13	15	17	15	0
Kirwan demands Italy consistency Italy coach John Kirwan has challenged his side to match the performance they produced in pushing Ireland close when they meet Wales on Saturday. Despite losing 28-17 in Sunday's Six Nations encounter, the Italians confirmed their continuing improvement. "Our goal is to match every side we face and against Ireland we showed we could do that," said Kirwan. "But the…	rugby	kirwan demands italy consistency italy coach john kirwan challenged match performance produced pushing ireland close meet wales saturday losing sunday nations encounter italians confirmed continuing improvement goal match ireland kirwan build performance play wales saturday italy mixed afternoon recalled alessandro troncon impressing luciano orquera boot kirwan happy troncon incredible game attac…	0	0	0	2	0	4	4	7	0	7	8	11	11	8	13	3	7	12	15
Fit-again Betsen in France squad France have brought flanker Serge Betsen back into their squad to face England at Twickenham on Sunday. But the player, who missed the victory over Scotland through injury, must attend a disciplinary hearing on Wednesday after being cited by Wasps. "Serge has a good case so we are confident he will play," said France coach Bernard Laporte. The inexperienced Nicola…	rugby	betsen france squad france brought flanker serge betsen squad england twickenham sunday player missed victory scotland injury attend disciplinary hearing wednesday cited wasps serge confident play france coach bernard laporte inexperienced nicolas mas jimmy marlu grandclaude included squad trio called pieter de villiers ludovic valbon aurelien rougerie picked injuries france win saturday laporte …	0	0	0	2	0	4	4	7	0	7	8	11	11	8	13	4	17	15	0
Wales critical of clumsy Grewcock Wales coach Mike Ruddock says England lock Danny Grewcock needs to review his actions after he kicked Dwayne Peel. Trouble flared at a ruck in the first half of Wales' 11-9 win in Cardiff as Grewcock came recklessly over the top with his boot, leaving Peel bloodied. Grewcock was sin-binned with Wales captain Gareth Thomas for retaliation. "It's up to the citing c…	rugby	wales critical clumsy grewcock wales coach mike ruddock england lock danny grewcock review actions kicked dwayne peel trouble flared ruck half wales win cardiff grewcock recklessly top boot leaving peel bloodied grewcock wales captain gareth thomas retaliation citing commissioner ruddock deliberate grewcock bath leinster june grewcock banned rugby months reckless boot match zealand earlier zealan…	0	0	0	2	0	4	4	7	0	7	8	11	11	8	13	15	17	15	0
Henson stakes early Lions claim The Six Nations may be a glittering prize in itself but every player from the four Home Unions will also have one eye on a possible trip to New Zealand with the Lions this summer. The player who staked the biggest claim for a place in the starting XV over the weekend was Gavin Henson. He's very confident. You just had to listen to his interview afterwards - he beam…	rugby	henson stakes lions claim nations glittering prize player unions eye trip zealand lions summer player staked biggest claim starting xv weekend gavin henson confident listen interview beamed confidence element arrogance arrogance nice touches clean pair heels mathew tait defence kicks hand mentioning majestic penalty wait test brian french midfield wales stephen jones player impressed direction co…	0	0	0	2	0	4	4	7	0	7	8	11	11	8	13	15	17	15	0
Murphy: That was a bruising battle That's what I call a tough game. It was very physical and fair play to the Italians they made us work very hard for our victory. Their organisation was very, very good and they proved again that they are getting better and better as the years go by. It is by far the strongest Italian team that we have faced. We knew all along that we would be a huge threat parti…	rugby	murphy bruising battle call tough game physical fair play italians hard victory organisation proved strongest italian team faced huge threat game championship days scores board socks build scores gradually hard players plenty bumps bruises prove bad feeling bit monday morning frustrated rucking laws bit problematical interpretations referee players difficult managed ball hands half score brian sc…	0	0	0	2	0	4	4	7	0	7	8	11	11	14	13	3	4	12	15
Wales make two changes for France Wales coach Mike Ruddock has made two changes from the team that beat Italy 38-8 for Saturday's trip to France. Kevin Morgan takes over from his injured Newport-Gwent Dragons colleague Hal Luscombe on the right wing. And in the pack Neath-Swansea Ospreys forward Ryan Jones is preferred at blindside flanker to Jonathan Thomas. Thomas, a try-scorer in Rome, drops d…	rugby	wales france wales coach mike ruddock team beat italy saturday trip france kevin morgan takes injured dragons colleague hal luscombe wing pack ospreys forward ryan jones preferred blindside flanker jonathan thomas thomas rome drops bench ian gough cardiff rhys williams steps morgan luscombe sidelined hamstring sustained nations game italy weekend experienced morgan pushing hard start stade de fra…	0	0	0	2	0	4	4	7	0	7	8	11	11	8	13	15	17	15	0
Ireland surge past Scots Ireland maintained their Six Nations Grand Slam ambitions with an impressive victory over Scotland at Murrayfield. Hugo Southwell's try gave the Scots an early 8-0 lead but scores from locks Malcolm O'Kelly and Paul O'Connell put the visitors in command by half-time. A third try from wing Denis Hickie and third penalty from Ronan O'Gara, who kicked 13 points, extended the…	rugby	ireland surge scots ireland maintained nations grand slam ambitions impressive victory scotland murrayfield hugo southwell scots lead scores locks malcolm paul visitors command wing denis hickie penalty ronan kicked extended lead jon petrie scored scotland late scores john hayes gavin duffy sealed victory victories eddie forward welcoming england lansdowne road fortnight scotland coach matt willi…	0	0	0	2	0	4	4	7	0	7	8	11	11	8	13	3	7	12	15
Wales win in Rome Wales secured their first away win in the RBS Six Nations for nearly four years with a six-try victory in Rome. Tries from Jonathan Thomas, Tom Shanklin and Martyn Williams gave the visitors a 19-5 half-time advantage. Luciano Orquera did reply with one for Italy but second-half efforts from Brent Cockbain, Shane Williams and Robert Sidoli sealed victory. Fly-half Stephen Jones …	rugby	wales win rome wales secured win rbs nations victory rome jonathan thomas tom shanklin martyn williams visitors advantage luciano orquera reply italy efforts brent cockbain shane williams robert sidoli sealed victory stephen jones conversions wales maintained superb start tournament starting confidence victory england visitors scored minutes diminutive wing shane williams fielded kick ahead dance…	0	0	0	2	0	4	4	7	0	7	8	11	11	8	13	15	17	15	0
White prepared for battle Tough-scrummaging prop Julian White is expecting a resurgent Wales to give him a rough ride in England's Six Nations opener in Cardiff on Saturday. The Leicester tight-head is in the form of his life, making the England number three shirt his own. But he knows Wales will put his technique under immense scrutiny. "The Welsh scrum is a force to be reckoned with," he told B…	rugby	white prepared battle prop julian white expecting resurgent wales rough ride england nations opener cardiff saturday leicester form life england shirt wales technique immense scrutiny welsh scrum force reckoned told bbc sport lot white impressed welsh pack strength depth gethin jenkins starting played bit favoured position massive contribution england leicester late arguably form prop destroyed s…	0	0	0	2	0	4	4	7	0	0	0	0	0	0	0	14	0	0	17
O'Driscoll saves Irish blushes Two moments of magic from Brian O'Driscoll guided Ireland to a workmanlike victory against Italy. A pair of classic outside breaks from the Ireland captain set up tries for Geordan Murphy and Peter Stringer. Italy led 9-8 early in the second half but Stringer's try gave Ireland a lead they never lost. The hosts cut the gap to 18-12 with 10 minutes left and nearly sc…	rugby	saves irish blushes moments magic brian guided ireland workmanlike victory italy pair classic breaks ireland captain set geordan murphy peter stringer italy led half stringer ireland lead lost hosts cut gap minutes left scored ludovico nitoglia denis hickie ensured irish victory italy flying blocks lead luciano orquera penalty minutes hosts missed kickable penalties ireland drew level ronan penal…	0	0	0	2	0	4	4	7	0	7	8	11	11	8	13	3	7	12	15
Barkley fit for match in Ireland England centre Olly Barkley has been passed fit for Sunday's Six Nations clash with Ireland at Lansdowne Road. Barkley withdrew from Bath's team for Friday's clash with Gloucester after suffering a calf injury in training. Gloucester centre Henry Paul has also been cleared to play after overcoming an ankle injury. England coach Andy Robinson, who names his team on…	rugby	barkley fit match ireland england centre olly barkley passed fit sunday nations clash ireland lansdowne road barkley withdrew bath team friday clash gloucester suffering calf injury training gloucester centre henry paul cleared play overcoming ankle injury england coach andy robinson names team wednesday called bath prop duncan bell phil vickery broken arm vickery sidelined weeks julian white nec…	0	0	0	2	0	4	4	7	0	0	0	0	0	0	0	14	0	0	17
Wales stars need a rest - Ruddock Wales coach Mike Ruddock has defended his decision not to release any of the international stars for this weekend's regional Celtic League fixtures. Ruddock says the players will benefit from the rest, and their absence will give youngsters a chance to impress. "We've got the WRU charter in place now which outlines exactly what happens," Ruddock told BBC Wales Sp…	rugby	wales stars rest ruddock wales coach mike ruddock defended decision release international stars weekend regional celtic league fixtures ruddock players benefit rest absence youngsters chance impress wru charter outlines ruddock told bbc wales sport nations players released wru ospreys scarlets happy support wales dragons expressed disappointment national squad players friday game ulster ceri swee…	0	0	0	2	0	4	4	7	0	7	8	11	11	8	13	15	17	15	0
Munster Cup tie switched to Spain Munster's Heineken Cup quarter-final tie against Biarritz on 3 April has been switched to Real Sociedad's Paseo de Anoeta stadium in San Sebastian. Real's ground holds 32,000 whereas the Parc des Sports Aguilera in Biarritz has a capacity of just 12,667. The Irish province will be given at least 8,000 tickets. "The decision to move was a difficult one, but as we …	rugby	munster cup tie switched spain munster heineken cup tie biarritz april switched real sociedad paseo de anoeta stadium san sebastian real ground holds parc des sports aguilera biarritz capacity irish province tickets decision move difficult considered fans primary objectives biarritz chairman marcel martin hope rewarded huge crowd behaving rugby tradition match heineken cup fixture played spain ex…	0	0	0	2	0	4	4	7	4	6	7	6	10	10	7	10	5	13	9
Williams says he will never quit Defiant Matt Williams says he will not quit as Scotland coach even if his side slump to a new low with defeat by Italy at Murrayfield. That would leave the Scots as favourites to win the Wooden Spoon for the second year running. "I have never quit anything in my life, apart from maybe painting the kitchen," he told BBC Sport. "The support we have been given from M…	rugby	williams quit defiant matt williams quit scotland coach slump low defeat italy murrayfield leave scots favourites win wooden spoon running quit life painting kitchen told bbc sport support murrayfield time williams experience rbs nations victory attempts scotland lost games leadership rejected comparison media sources berti vogts sacked scotland football manager poor german football coach austral…	0	0	0	2	0	4	4	7	0	7	8	11	11	8	13	15	17	15	0
Pountney handed ban and fine Northampton coach Budge Pountney has been fined 拢2,000 and banned from match-day coaching for six weeks for calling a referee "a disgrace". Pountney was found guilty of bringing the game into disrepute at a Rugby Football Union disciplinary hearing in London on Thursday night. Pountney criticised referee Steve Lander's performance in Northampton's defeat by Saracens o…	rugby	pountney handed ban fine northampton coach budge pountney fined banned coaching weeks calling referee disgrace pountney guilty bringing game disrepute rugby football union disciplinary hearing london thursday night pountney criticised referee steve lander performance northampton defeat saracens february weeks ban suspended pountney pleaded guilty offence panel consisting chairman robert horner ni…	0	0	0	2	0	5	4	5	8	3	0	6	3	10	12	11	4	2	16
France v Wales (Sat) Stade de France, Paris Saturday, 26 February 1600 GMT BBC1, Radio 4 LW and this website France may have beaten Scotland and England but they were tedious and uninspired throughout both matches. Wales, on the other hand, have played some fine rugby and have made their best start since they last won the title in 1994. They also have a good record at the Stade de France, having …	rugby	france wales sat stade de france paris saturday february gmt radio lw website france beaten scotland england tedious uninspired matches wales hand played fine rugby start won title record stade de france won games wales team thrashed italy rome kevin morgan takes injured dragons colleague hal luscombe wing pack ospreys forward ryan jones bas brought flank beef wales row jonathan thomas wales coac…	0	0	0	2	0	4	4	7	0	7	8	11	11	8	13	15	17	15	0
Woodward eyes Brennan for Lions Toulouse's former Irish international Trevor Brennan could be one of Clive Woodward's many surprises when the 44-man Lions tour squad is announced. Brennan, who last played for Ireland against Samoa in 2001, is held in high esteem by the former England coach. "If you speak to the players there's a huge amount of respect for the guy," Woodward told the Sunday Indepe…	rugby	woodward eyes brennan lions toulouse irish international trevor brennan clive woodward surprises lions tour squad announced brennan played ireland samoa held esteem england coach speak players huge amount respect guy woodward told sunday independent players tend coaches irish welsh english players dublin milkman moved leinster toulouse picked heineken cup winner medal final perpignan lansdowne ro…	0	0	0	2	0	4	4	7	0	6	0	0	0	10	4	2	9	13	8
Scotland v Italy (Sat) Murrayfield, Edinburgh Saturday, 26 February 1400 GMT BBC1, Five Live and this website Victory for the Azzurri in Rome last year saw Scotland end their campaign without a victory. And the pressure is on Scotland coach Matt Williams as he seeks a first Six Nations victory at the eighth attempt. Italy have lost both their opening games at home to Ireland and Wales, but travel…	rugby	scotland italy sat murrayfield edinburgh saturday february gmt live website victory azzurri rome scotland campaign victory pressure scotland coach matt williams seeks nations victory eighth attempt italy lost games ireland wales travel edinburgh hopes coach john kirwan warned eradicate errors blighted loss wales risk suffering successive defeat defeat wales taught level mistakes kirwan nations er…	0	0	0	2	0	4	4	7	0	7	8	11	11	8	13	3	7	12	15
Preview: Ireland v England (Sun) Lansdowne Road, Dublin Sunday, 27 February 1500 GMT BBC1, Radio 4 LW and this website Ireland are going for their first Grand Slam since 1948 after two opening wins, and England represent their sternest test of the Championship so far. England were sloppy and leaderless in the defeats against Wales and France and another loss would be unthinkable. The pressure is …	rugby	preview ireland england sun lansdowne road dublin sunday february gmt radio lw website ireland grand slam wins england represent sternest test championship england sloppy leaderless defeats wales france loss unthinkable pressure coach andy robinson deliver england dramatic dip form cup final lost matches ireland coach eddie underestimate visitors kicked beaten france created landscape sunday engl…	0	0	0	2	0	4	4	7	0	0	0	0	0	0	0	14	0	0	17
Leeds v Saracens (Fri) Headingley Friday, 25 February 2000 GMT The Tykes have brought in Newcastle prop Ed Kalman and Tom McGee from the Borders on loan while fly-half Craig McMullen has joined from Narbonne. Raphael Ibanez is named at hooker for Saracens in one of four changes. Simon Raiwalui and Ben Russell are also selected in the pack while Kevin Sorrell comes in at outside centre. - Friday's…	rugby	leeds saracens fri headingley friday february gmt tykes brought newcastle prop kalman tom mcgee borders loan craig mcmullen joined narbonne raphael ibanez named hooker saracens simon raiwalui ben russell selected pack kevin sorrell centre friday game headingley friday passing pitch inspection leeds balshaw rees christophers bell doherty mcmullen dickens mcgee rawlinson gerber murphy palmer capt m…	0	0	0	2	0	4	4	7	0	7	8	11	11	8	13	3	7	12	15
Worcester v Sale (Fri) Sixways Friday, 25 February 2000 GMT They make just one change, with Tim Collier replacing Phil Murphy in the second row. In contrast, Sale are missing 14 players due to a combination of international call-ups and injuries. John Payne and Chris Rhys Jones come into the centres while scrum-half Richard Wigglesworth looks set to play on the wing. Delport; Pieters, Rasmussen, …	rugby	worcester sale fri sixways friday february gmt change tim collier replacing phil murphy row contrast sale missing players combination international injuries john payne chris rhys jones centres richard wigglesworth set play wing delport pieters rasmussen lombard brown powell windo van niekerk horsman collier gillies hickey sanderson henderson replacements fortey murphy daly vaili cole hayes truema…	0	0	0	2	0	4	4	7	0	7	8	11	11	8	13	15	13	2	16
Robinson answers critics England captain Jason Robinson has rubbished suggestions that the world champions are a team in decline. England were beaten 11-9 by Wales in their Six Nations opener in Cardiff last week and face current champions France at Twickenham on Sunday. Robinson said: "We are certainly not on the decline. You lose one game and it doesn't make you a bad team. "I have no doubt in …	rugby	robinson answers critics england captain jason robinson rubbished suggestions champions team decline england beaten wales nations opener cardiff week current champions france twickenham sunday robinson decline lose game bad team doubt players team beat day england striving avoid successive championship defeat time robinson believes england team rot france weekend won game lose play week win prove…	0	0	0	2	0	4	4	7	0	0	0	0	0	0	0	14	0	0	17
Sella wants Michalak recall Former France centre Philippe Sella believes coach Bernard Laporte must recall Frederic Michalak to give his side any chance of beating Ireland. Sella admitted he had been impressed by current fly-half Yann Delaigue in the RBS Six Nations to date. But he told BBC Sport: "Michalak is the answer both now and for the future. Delaigue deserved his chance but the time has c…	rugby	sella michalak recall france centre philippe sella believes coach bernard laporte recall frederic michalak chance beating ireland sella admitted impressed current yann delaigue rbs nations told bbc sport michalak answer future delaigue deserved chance time bring michalak weaknesses game upset ireland michalak spent tournament bench delaigue impressed castres season michalak overlooked french stut…	0	0	0	2	0	4	4	7	0	7	8	11	11	8	13	4	17	15	0
Umaga ready for Lions All Blacks captain Tama Umaga has warned the British and Irish Lions will be his most fearsome opponents yet ahead of their summer tour. But Umaga, in England for Saturday's IRB Rugby Aid match, also backed New Zealand to win the three-Test series against the Lions. He told BBC Sport: "It's potentially the most fearsome line-up I've ever come up against. They're awesome. "Bu…	rugby	umaga ready lions blacks captain tama umaga warned british irish lions fearsome opponents ahead summer tour umaga england saturday irb rugby aid match zealand win series lions told bbc sport fearsome awesome beat lions boss sir clive woodward set squad tour month woodward appointed believed rely heavily england players umaga hard pushed shape nations wrong england lot talented guys lions test xv …	0	0	0	2	0	4	4	7	0	6	0	0	0	10	4	2	9	13	8
Umaga ready for "fearsome" Lions All Blacks captain Tama Umaga has warned the British and Irish Lions will be his most fearsome opponents yet ahead of their summer tour. But Umaga, in England for Saturday's IRB Rugby Aid match, also backed New Zealand to win the three-Test series against the Lions. He told BBC Sport: "It's potentially the most fearsome line-up I've ever come up against. They're a…	rugby	umaga ready fearsome lions blacks captain tama umaga warned british irish lions fearsome opponents ahead summer tour umaga england saturday irb rugby aid match zealand win series lions told bbc sport fearsome awesome beat lions boss sir clive woodward set squad tour month woodward appointed believed rely heavily england players umaga hard pushed shape nations wrong england lot talented guys lions…	0	0	0	2	0	4	4	7	0	6	0	0	0	10	4	2	9	13	8
Campese berates whingeing England Former Australian wing David Campese has told England to stop whingeing in the wake of their defeat to Ireland. England coach Andy Robinson lambasted referee Jonathan Kaplan for costing them the game after disallowing tries from Mark Cueto and Josh Lewsey. But Campese told BBC Sport: "Robinson is living up to England's reputation as whingeing Poms. "Stop going on…	rugby	campese berates whingeing england australian wing david campese told england whingeing wake defeat ireland england coach andy robinson lambasted referee jonathan kaplan costing game disallowing mark cueto josh lewsey campese told bbc sport robinson living england reputation whingeing poms cares acting team cheated win england contemplating complaint international rugby board potential cueto half …	0	0	0	2	0	4	4	7	0	0	0	0	0	0	0	14	0	0	17
O'Driscoll/Gregan lead Aid stars Ireland's Brian O'Driscoll will lead the Northern Hemisphere team in the IRB Rugby Aid match at Twickenham. O'Driscoll heads a star-studded cast for the contest to raise funds for the tsunami appeal. The South will be led by George Gregan, one of four Wallabies, alongside five Springboks and four All Blacks including captain Tana Umaga. South African flanker Schal…	rugby	lead aid stars ireland brian lead northern hemisphere team irb rugby aid match twickenham heads cast contest raise funds tsunami appeal south led george gregan wallabies alongside springboks blacks including captain tana umaga south african flanker schalk burger shaken leg injury starting join fellow springboks john smit cobus visagie victor matfield south pack jacque fourie centres north hit wit…	0	0	0	2	0	4	4	7	0	7	8	11	11	10	13	15	17	13	0
Harinordoquy suffers France axe Number eight Imanol Harinordoquy has been dropped from France's squad for the Six Nations match with Ireland in Dublin on 12 March. Harinordoquy was a second-half replacement in last Saturday's 24-18 defeat to Wales. Bourgoin lock Pascal Pape, who has recovered from a sprained ankle, returns to the 22-man squad. Wing Cedric Heymans and Ludovic Valbon come in for Au…	rugby	harinordoquy suffers france axe imanol harinordoquy dropped france squad nations match ireland dublin march harinordoquy replacement saturday defeat wales bourgoin lock pascal pape recovered sprained ankle returns squad wing cedric heymans ludovic valbon aurelien rougerie grandclaude rougerie hurt chest wales grandclaude replacement england wales valbon capped june tests united canada half replac…	0	0	0	2	0	4	4	7	0	7	8	11	11	8	13	4	17	15	0
Parker misses England clash Tom Shanklin will start in the centre for Wales against England in Cardiff on Saturday after Sonny Parker failed to recover from a trapped neck nerve. Shanklin was first-choice wing in the autumn Tests, but prefers centre and will face England debutant Mathew Tait. Dragons three-quarter Hal Luscombe takes Shanklin's wing berth. Up front, Mefin Davies plays at hooker, o…	rugby	parker misses england clash tom shanklin start centre wales england cardiff saturday sonny parker failed recover trapped neck nerve shanklin wing autumn tests prefers centre england debutant mathew tait dragons hal luscombe takes shanklin wing berth front mefin davies plays hooker martyn williams fit start lock rob sidoli replaces veteran gareth llewellyn davies wins vote ahead robin mcbryde sits…	0	0	0	2	0	4	4	7	0	7	8	11	11	8	13	15	17	15	0
Stevens named in England line-up England have named Bath prop Matt Stevens in the starting line-up for their Six Nations match against Ireland at Lansdowne Road on Sunday. Fellow Bath prop Duncan Bell will start on the bench, as coach Andy Robinson makes just one change to the team that was beaten by France. It will be Stevens' first start after two caps as a replacement against the All Blacks la…	rugby	stevens named england england named bath prop matt stevens starting nations match ireland lansdowne road sunday fellow bath prop duncan bell start bench coach andy robinson change team beaten france stevens start caps replacement blacks leicester duo ollie smith andy goode drafted bench stevens takes phil vickery suffered broken arm playing gloucester weekend confident matt grasp opportunity mark…	0	0	0	2	0	4	4	7	0	0	0	0	0	0	0	14	0	0	17
Bortolami predicts dour contest Italy skipper Marco Bortolami believes Saturday's Six Nations contest against Scotland will be a scrappy encounter. With both sides looking for their first win of the championship, the third-round game at Murrayfield has been billed as a wooden-spoon decider. And Bortolami feels the Edinburgh contest could end up being a bruising battle of the packs. "It will not b…	rugby	bortolami predicts dour contest italy skipper marco bortolami believes saturday nations contest scotland scrappy encounter win championship game murrayfield billed decider bortolami feels edinburgh contest bruising battle packs pretty game teams desperate gain win lock forward italy recorded wins joined nations scotland italy stubborn display ireland losing outplayed impressive welsh rome time it…	0	0	0	2	0	4	4	7	0	7	8	11	11	8	13	3	7	12	15
Corry backs skipper Robinson England forward Martin Corry says Jason Robinson is the right man to lead the national team back to winning ways. After losses to Wales and France, critics have started to wonder whether Robinson can captain from full-back. But Corry has backed Robinson, who was given the role after the injury to fly-half Jonny Wilkinson, ahead of this weekend's trip to Ireland. "Jaso…	rugby	corry skipper robinson england forward martin corry jason robinson lead national team winning losses wales france critics started robinson captain corry robinson role injury jonny wilkinson ahead weekend trip ireland jason tremendous job week respect corry told bbc radio live inspirational captain talks squad talks lot sense players lot respect honour england honour play england immense pressure …	0	0	0	2	0	4	4	7	0	0	0	0	0	0	0	14	0	0	17
Prop Jones ready for hard graft Adam Jones says the Wales forwards are determined to set the perfect attacking platform for the backs by dominating the powerful France pack in Paris. The prop said: "If we get stuffed in the front five our backs have had it. "The mentality of the French is 'scrum, scrum, scrum'. We will see how good France are and the scrum is the key. "I just hope [the backs] car…	rugby	prop jones ready hard graft adam jones wales forwards determined set perfect attacking platform dominating powerful france pack paris prop stuffed front mentality french scrum scrum france scrum key hope carry left italy forwards win ball opportunity wales won visits stade de france secured wins graham henry likes shane williams gavin henson finding top form time mike ruddock team international r…	0	0	0	2	0	4	4	7	0	7	8	11	11	8	13	15	17	15	0
Moody joins up with England Lewis Moody has flown to Dublin to join England's camp ahead of their RBS Six Nations game against Ireland on Sunday. Despite joining the squad, the Leicester flanker only has a "slim" chance of playing because of an infection in his finger. A decision will be taken on Saturday as to whether the 26-year-old will be declared fit. If he fails to recover in time for the g…	rugby	moody joins england lewis moody flown dublin join england camp ahead rbs nations game ireland sunday joining squad leicester flanker slim chance playing infection finger decision saturday declared fit fails recover time game pack andy hazell chris jones start game bench chances playing slim coach andy robinson infection deeper moody drip attempt force antibiotics infected finger suffered cut play…	0	0	0	2	0	4	4	7	0	0	0	0	0	0	0	14	0	0	17
Captains lining up for Aid match Ireland's Brian O'Driscoll is one of four Six Nations captains included in the Northern Hemisphere squad for the IRB Rugby Aid match on 5 March. France's Fabien Pelous, Gordon Bullock of Scotland and Italy's Marco Bortolami are also in the Northern party. Sir Clive Woodward will coach the Northern team against Rod Macqueen's Southern Hemisphere team in a tsumani f…	rugby	captains lining aid match ireland brian nations captains included northern hemisphere squad irb rugby aid match march france fabien pelous gordon bullock scotland italy marco bortolami northern party sir clive woodward coach northern team rod macqueen southern hemisphere team tsumani match twickenham forward outstanding players chance woodward assess options unveiling british irish lions touring …	0	0	0	2	0	4	4	7	0	7	8	11	11	8	13	15	17	13	0
Castaignede fires Laporte warning Former France fly-half Thomas Castaignede has warned the pressure is mounting on coach Bernard Laporte following their defeat by Wales. France suffered a shock loss against the Welsh at the weekend after looking on course for an easy win. Castaignede told BBC Sport: "The pressure is big on Laporte after a huge loss to New Zealand, a slim win over Scotland and a m…	rugby	castaignede fires laporte warning france thomas castaignede warned pressure mounting coach bernard laporte defeat wales france suffered shock loss welsh weekend easy win castaignede told bbc sport pressure laporte huge loss zealand slim win scotland miracle england french team lansdowne road victories south africa australia november france deemed leading trounced zealand beat scotland scots disal…	0	0	0	2	0	4	4	7	0	7	8	11	11	8	13	4	17	15	0
Charvis set to lose fitness bid Flanker Colin Charvis is unlikely to play any part in Wales' final two games of the Six Nations. Charvis has missed all three of Wales' victories with an ankle injury and his recovery has been slower than expected. "He will not figure in the Scotland game and is now thought unlikely to be ready for the final game," said Wales physio Mark Davies. Sonny Parker is con…	rugby	charvis set lose fitness bid flanker colin charvis play wales final games nations charvis missed wales victories ankle injury recovery slower expected figure scotland game ready final game wales physio mark davies sonny parker continuing struggle neck injury hal luscombe fit murrayfield trip centre parker slim chance involved scots march luscombe return fitness missing france match hamstring trou…	0	0	0	2	0	4	4	7	0	7	8	11	11	8	13	15	17	15	0
Robinson out of Six Nations England captain Jason Robinson will miss the rest of the Six Nations because of injury. Robinson, stand-in captain in the absence of Jonny Wilkinson, had been due to lead England in their final two games against Italy and Scotland. But the Sale full-back pulled out of the squad on Wednesday because of a torn ligament in his right thumb. The 30-year-old will undergo an …	rugby	robinson nations england captain jason robinson rest nations injury robinson captain absence jonny wilkinson lead england final games italy scotland sale pulled squad wednesday torn ligament thumb undergo operation friday england replacement skipper robinson disappointing england games nations twickenham games club sale sharks playing april robinson picked injury defeat ireland lansdowne road sat…	0	0	0	2	0	4	4	7	0	0	0	0	0	0	0	14	0	0	17
England coach faces rap after row England coach Andy Robinson is facing disciplinary action after criticising referee Jonathan Kaplan in his side's Six Nations defeat to Ireland. The Rugby Football Union (RFU) will investigate Robinson after deciding not to lodge a complaint against Kaplan. Robinson may even have to apologise for his comments in order to avoid sanction from the International Rugb…	rugby	england coach rap row england coach andy robinson facing disciplinary action criticising referee jonathan kaplan nations defeat ireland rugby football union rfu investigate robinson deciding lodge complaint kaplan robinson apologise comments avoid sanction international rugby board robinson livid kaplan decisions saturday disallow england england coach claim refereed reviewing tapes match rfu dec…	0	0	0	2	0	4	4	7	0	0	0	0	0	0	0	14	0	0	17
Harinordoquy suffers France axe Number eight Imanol Harinordoquy has been dropped from France's squad for the Six Nations match with Ireland in Dublin on 12 March. Harinordoquy was a second-half replacement in last Saturday's 24-18 defeat to Wales. Bourgoin lock Pascal Pape, who has recovered from a sprained ankle, returns to the 22-man squad. Wing Cedric Heymans and Ludovic Valbon come in for Au…	rugby	harinordoquy suffers france axe imanol harinordoquy dropped france squad nations match ireland dublin march harinordoquy replacement saturday defeat wales bourgoin lock pascal pape recovered sprained ankle returns squad wing cedric heymans ludovic valbon aurelien rougerie grandclaude rougerie hurt chest wales grandclaude replacement england wales valbon capped june tests united canada half replac…	0	0	0	2	0	4	4	7	0	7	8	11	11	8	13	4	17	15	0
Wilkinson return 'unlikely' Jonny Wilkinson looks set to miss the whole of the 2005 RBS Six Nations. England's World Cup-winning fly-half said last week he was hoping to recover from his latest injury in time to play some role in the championship. But Rob Andrew, coach of Wilkinson's club side Newcastle, said that with only two games left to play Wilkinson was unlikely to be fit in time. "It woul…	rugby	wilkinson return jonny wilkinson set rbs nations england week hoping recover injury time play role championship rob andrew coach wilkinson club newcastle games left play wilkinson fit time irresponsible straight test match andrew told times wilkinson recovering knee injury neck arm injuries played england cup final november stuttering champions lost matches wilkinson aiming start season zurich pr…	0	0	0	2	0	4	4	7	0	0	0	0	0	0	0	14	0	0	17
England 'to launch ref protest' England will protest to the International Rugby Board (IRB) about the referee's performance in the defeat by Ireland, reports the Daily Mail. England coach Andy Robinson has called on ex-international referees Colin High and Steve Lander to analyse several of Jonathan Kaplan's decisions. "I want to go through the tape with Colin and Steve," Robinson told the Daily …	rugby	england launch protest england protest international rugby board irb referee performance defeat ireland reports daily mail england coach andy robinson called referees colin steve lander analyse jonathan kaplan decisions tape colin steve robinson told daily mail speak irb refereed rugby football union referees manager claimed kaplan major errors changed outcome sunday match england beaten irish du…	0	0	0	2	0	4	4	7	0	0	0	0	0	0	0	14	0	0	17
Moore questions captaincy Brian Moore believes the England captain should not be a full-back. Jason Robinson has led the team during their opening three defeats in the Six Nations tournament, in the absence of fly-half Jonny Wilkinson. The world champions have struggled since the retirement of former captain Martin Johnson, a lock forward. And former England captain Moore told the BBC: "Full-back…	rugby	moore questions captaincy brian moore believes england captain jason robinson led team defeats nations tournament absence jonny wilkinson champions struggled retirement captain martin johnson lock forward england captain moore told bbc action reflection robinson personally influence move closer pack games start finish moore lack cohesion forwards reasons england lost wales france ireland tourname…	0	0	0	2	0	4	4	7	0	0	0	0	0	0	0	14	0	0	17
Owen set for skipper role Wales number eight Michael Owen says replacing Gareth Thomas as Wales' captain will be straightforward because of the leadership quality in the squad. "You dream about playing for Wales, but it never enters your head that you will one day captain your country," he said. "It's an easy job really because there are so many experienced players in the side, but it will be a m…	rugby	owen set skipper role wales michael owen replacing gareth thomas wales captain straightforward leadership quality squad dream playing wales enters head day captain country easy job experienced players massive honour coach mike ruddock armband broken thumb victim thomas scotland ruddock praised owen contribution pack leader wins england italy france notably role paris thomas injury dragons thomas …	0	0	0	2	0	4	4	7	0	7	8	11	11	8	13	15	17	15	0
Italy aim to rattle England Italy coach John Kirwan believes his side can upset England as the Six Nations wooden spoon battle hots up. The two sides, both without a win, meet on 12 March at Twickenham and Kirwan says his side will be hoping to make the most of England's current slump. "We have to make sure the England and France games are tough for them. "England have not been having the best of…	rugby	italy aim rattle england italy coach john kirwan believes upset england nations wooden spoon battle hots win meet march twickenham kirwan hoping england current slump england france games tough england championships players rise occasion kirwan admits lot hard kickers trip london roland de marigny luciano orquera miserable time boot dire defeat scotland chris paterson stole hosts victory kirwan k…	0	0	0	2	0	4	4	7	0	0	0	0	0	0	0	14	0	0	17
Dal Maso in to replace Bergamasco David dal Maso has been handed the task of replacing the injured Mauro Bergamasco at flanker in Italy's team to face Scotland on Saturday. Alessandro Troncon continues at scrum-half despite the return to fitness of Paul Griffen. The experienced Cristian Stoica is recalled at centre at the expense of Walter Pozzebon. "We are going to Scotland for the first away wi…	rugby	dal maso replace bergamasco david dal maso handed task replacing injured mauro bergamasco flanker italy team scotland saturday alessandro troncon continues return fitness paul griffen experienced cristian stoica recalled centre expense walter pozzebon scotland win manager marco bollesan team faith saturday game lost player mauro bergamasco coach john kirwan team de marigny parma mirco bergamasco …	0	0	0	2	0	4	4	7	0	7	8	11	11	8	13	3	7	12	15
Teenager Tait picked for England Newcastle's teenage centre Mathew Tait has been named as a centre in England's team to face Wales in the Six Nations opener in Cardiff on Saturday. The 18-year-old will play alongside Falcons' team-mate Jamie Noon in England's midfield. Scrum-half Matt Dawson is also recalled, despite been left out of the initial squad after a row over clashing TV and training com…	rugby	teenager tait picked england newcastle teenage centre mathew tait named centre england team wales nations opener cardiff saturday play alongside falcons jamie noon england midfield matt dawson recalled left initial squad row clashing tv training commitments bath lock danny grewcock start pending citing england coach andy robinson awarded gloucester flanker andy hazell nations start change lost au…	0	0	0	2	0	4	4	7	0	0	0	0	0	0	0	14	0	0	17
Wood - Ireland can win Grand Slam Former captain Keith Wood believes Ireland can win only their second Grand Slam - and first since 1948 - in this year's RBS Six Nations Championship. After claiming their first Triple Crown for 19 years last season, Wood tips his former team-mates to go one better. "Things have been building up over the past few years and I think this is the year for Ireland," he…	rugby	wood ireland win grand slam captain keith wood believes ireland win grand slam rbs nations championship claiming triple crown season wood tips building ireland told bbc sport chance win grand slam lot favour england france ireland finished times including nations finished top flanker keith gleeson coach eddie contend sort casualty lists hit england scotland prior tournament ireland win stay injur…	0	0	0	2	0	4	4	7	0	7	8	11	11	8	13	3	17	15	0
Scots suffer another injury blow Scotland's back row crisis has worsened ahead of the RBS Six Nations with news that Scott Gray will miss out on the opening matches. The Borders flanker has a knee injury and joins Donnie Macfadyen and Allister Hogg on the sidelines. Star number eight Simon Taylor will miss at least the first two games after damaging an ankle during his comeback. Scott MacLeod (an…	rugby	scots suffer injury blow scotland row crisis worsened ahead rbs nations news scott gray matches borders flanker knee injury joins donnie macfadyen allister hogg sidelines star simon taylor games damaging ankle comeback scott macleod ankle ligaments jon petrie cartilage doubtful opener paris february gray won cap australia murrayfield hurt club action weekend scotland doctor james robson scan dama…	0	0	0	2	0	4	4	7	0	7	8	11	11	8	13	15	17	12	15
O'Sullivan keeps his powder dry When you are gunning for glory and ultimate success keeping the gunpowder dry is essential. Ireland coach Eddie O'Sullivan appears to have done that quite successfully in the run-up to this season's Six Nations Championship. He decreed after the 2003 World Cup that players should have a decent conditioning period during the year. That became a reality at the end of…	rugby	powder dry gunning glory ultimate success keeping gunpowder dry essential ireland coach eddie appears season nations championship decreed cup players decent conditioning period reality summer period start season annoyed scottish welsh cousins huffed puffed disrespect celtic league mike ruddock poaching dragons faced leinster sunday rights talking national pride irfu thrown weight glad main contra…	0	0	0	2	0	4	4	7	0	7	8	11	11	8	13	3	7	12	15
Wales get Williams fitness boost Wales are hopeful that openside flanker Martyn Williams could be fit for Saturday's RBS 6 Nations championship opener against England in Cardiff. Williams was expected to miss the match with a disc problem in his neck, but has been making a speedy recovery. "He will have tests in the next 48 hours and we are pretty optimistic he is getting there," Wales' team phys…	rugby	wales williams fitness boost wales hopeful openside flanker martyn williams fit saturday rbs nations championship opener england cardiff williams expected match disc neck speedy recovery tests hours pretty optimistic wales team physiotherapist mark davies frustrating mend progress week williams fellow flanker colin charvis play month recovers foot injury ruled millennium stadium clash williams in…	0	0	0	2	0	4	4	7	0	7	8	11	11	8	13	15	17	15	0
Dawson joins England injury list Scrum-half Matt Dawson is an injury doubt for England's Six Nations opener against Wales next weekend. The World Cup winner missed Wasps' 12-9 loss to Bath on Saturday after injuring his right calf. Wasps coach Warren Gatland said: "He's got a fitness test in the week but he's got a good chance of playing." Gloucester's Andy Hazell and Leicester star Lewis Moody a…	rugby	dawson joins england injury list matt dawson injury doubt england nations opener wales weekend cup winner missed wasps loss bath saturday injuring calf wasps coach warren gatland fitness test week chance playing gloucester andy hazell leicester star lewis moody received knocks respective league matches fit wales week dawson fit wales robinson choose gloucester andy gomarsall leicester youngster h…	0	0	0	2	0	4	4	7	0	0	0	0	0	0	0	14	0	0	17
Wales want rugby league training Wales could follow England's lead by training with a rugby league club. England have already had a three-day session with Leeds Rhinos, and Wales are thought to be interested in a similar clinic with rivals St Helens. Saints coach Ian Millward has given his approval, but if it does happen it is unlikely to be this season. Saints have a week's training in Portugal …	rugby	wales rugby league training wales follow england lead training rugby league club england session leeds rhinos wales clinic rivals st helens saints coach ian millward approval happen season saints week training portugal week wales play england nations match february approach wales confirmed saints spokesman stages consideration st helens welsh connections obvious partners welsh rugby union spat co…	0	0	0	2	0	4	4	7	0	7	8	11	11	8	13	15	17	15	0
Saint-Andre anger at absent stars Sale Sharks director of rugby Philippe Saint-Andre has re-opened rugby's club-versus-country debate. Sale host Bath in the Powergen Cup on Friday, but the Frenchman has endured a "difficult week" with six players away on England's Six Nations training camp. "It's an important game but we've just the one full session. It's the same for everyone but we need to mana…	rugby	anger absent stars sale sharks director rugby philippe rugby debate sale host bath powergen cup friday frenchman endured difficult week players england nations training camp game session manage players picked country move game told bbc sport authorities agree believes england national team suffer clubs opt sign foreigners retired internationals politics english team english rugby argues issue not…	0	0	0	2	0	4	4	7	0	0	0	0	0	0	0	14	0	0	17
Ruddock backs Yapp's credentials Wales coach Mike Ruddock says John Yapp has what it takes as an international. The 21-year-old Blues prop is the only uncapped player in Wales' Six Nations squad, gaining a chance in the absence of Ospreys loose-head Duncan Jones. "John is a young man with a big future. He has been playing with the Blues for two years and has racked up mileage on his playing clock…	rugby	ruddock yapp credentials wales coach mike ruddock john yapp takes international blues prop uncapped player wales nations squad gaining chance absence ospreys duncan jones john future playing blues racked mileage playing clock ruddock international size physical lad ruddock assessment yapp coach blues wales lions prop dai john upward curve season strength strength told bbc sport wales ball carryin…	0	0	0	2	0	4	4	7	0	7	8	11	11	8	13	15	17	15	0
Player burn-out worries Robinson England coach Andy Robinson says English rugby has to act now to prevent injury destroying players' careers. He will be without a host of big names for the Six Nations as the intensity of professional rugby union hits players. "Injuries are part of the sport but we have to have a look at the amount of injuries that occur in the English season," Robinson told BBC S…	rugby	player worries robinson england coach andy robinson english rugby prevent injury destroying players careers host names nations intensity professional rugby union hits players injuries sport amount injuries occur english season robinson told bbc sport players careers robinson missing entire midfield nations likes jonny wilkinson mike tindall greenwood injured rugby union physically demanding game …	0	0	0	2	0	4	4	7	0	0	0	0	0	10	0	14	0	0	17
Hodges announces rugby retirement Scarlets and USA Eagles forward Dave Hodges has ended his playing career to pursue a coaching role in the States. The 36-year-old, who has 54 caps, was Llanelli's player of the season in 2001/2, but has battled injury for the last two of his seven years at Stradey. He tore a pectoral muscle against the Ospreys on Boxing Day, an injury that would have kept him out…	rugby	hodges announces rugby retirement scarlets usa eagles forward dave hodges playing career pursue coaching role caps llanelli player season battled injury stradey tore pectoral muscle ospreys boxing day injury season realising unable play season club agreed contract hodges move pursue opportunities scarlets generation scarlets begun rebuild squad season disappointing heineken cup campaign plenty si…	0	1	1	0	1	4	0	7	8	3	0	6	5	10	5	9	5	10	13
Funding cut hits Wales Students The Wales Students rugby side has become a casualty of the Welsh Rugby Union's reorganisation at youth level. An amalgamated Under-18 side formed from separate schools and national youth teams plays its first match on Thursday, against Italy at the Gnoll. But that move has seen the WRU decide to end its funding of representative sides such as Wales Students. As a r…	rugby	funding cut hits wales students wales students rugby casualty welsh rugby union reorganisation youth level amalgamated formed separate schools national youth teams plays match thursday italy gnoll move wru decide funding representative wales students result traditional international fixtures england france cancelled welsh students rugby football union feels unable properly prepare stage matches s…	0	0	0	2	0	4	4	7	0	7	8	11	11	10	13	15	17	15	0
Calder fears for Scottish rugby Former Scotland international Finlay Calder fears civil war at the SRU could seriously hamper his country's RBS Six Nations campaign. Four members of the executive board, including the chairman, David Mackay, have resigned after a simmering row. And Calder said: "This is terrible news for every level of Scottish rugby. "David is a successful businessman and I thoug…	rugby	calder fears scottish rugby scotland international finlay calder fears civil war sru hamper country rbs nations campaign executive board including chairman david mackay resigned simmering row calder terrible news level scottish rugby david successful businessman transform negative atmosphere rising debt level mackay executive board power struggle committee elected scotland club driven people happ…	0	0	0	2	0	4	4	7	0	7	0	6	5	10	5	9	9	13	13
A year to remember for Irish There used to be one subliminal moment during a year in Irish rugby that stood out more than most. Well, at least there used to one. Now there is a handful to look back with a mixture of satisfaction, and sorrow. It has been quite a year for the Irish, and not just with Eddie O'Sullivan's Triple Crown winning international outfit either. Right down through the ranks I…	rugby	remember irish subliminal moment irish rugby stood handful mixture satisfaction sorrow irish eddie triple crown winning international outfit ranks irish rugby creating waves upsetting established teams game kudos merry band warriors collected triple crown finished autumn campaign record succession finished spot rbs nations games november included victory champions grand slam chasing south africa …	0	0	0	2	0	4	4	7	0	0	0	0	0	10	0	3	7	12	15
Williams stays on despite dispute Matt Williams insists he has no thoughts of quitting as national coach as a result of the power struggle currently gripping Scottish rugby. The chairman, chief executive and three non-executive directors all departed in a row over the game's future direction. But Williams said: "I want to make it clear that I'm committed totally to Scottish rugby. "I've brought m…	rugby	williams stays dispute matt williams insists quitting national coach result power struggle gripping scottish rugby chairman chief executive directors departed row game future direction williams committed totally scottish rugby brought family immersed scottish life walking attempted steer dispute stress national team separate political situation undertaking difference people begrudge jealous drag …	0	0	0	2	0	4	4	7	0	7	0	6	5	10	5	15	17	13	13
Lomu relishing return to action Former All Black star Jonah Lomu says he cannot wait to run out on the pitch for former England rugby union captain Martin Johnson's testimonial on 4 June. The 29-year-old had a kidney transplant in July 2004 but will play his first full match for three years, leading a southern hemisphere side at Twickenham. "I actually started training three weeks after my operat…	rugby	lomu relishing return action black star jonah lomu wait pitch england rugby union captain martin johnson testimonial june kidney transplant july play match leading southern hemisphere twickenham started training weeks operation limited months ago basically bring giant winger match june game training schedule testing combines sevens lot lomu energy operation train times day days week mohammed ali …	0	0	0	2	0	4	4	7	0	0	0	0	0	10	4	14	9	13	17
Johnson announces June retirement Former England captain Martin Johnson has announced he is to retire from rugby union at the end of the season. Johnson, who captained England to World Cup glory in 2003, will play his final match in June. Johnson won 84 England caps and quit Test rugby at the start of 2004, just two months after leading Sir Clive Woodward's team to victory in Sydney. The 34-year-…	rugby	johnson announces june retirement england captain martin johnson announced retire rugby union season johnson captained england cup glory play final match june johnson won england caps quit test rugby start months leading sir clive woodward team victory sydney leicester lock final match testimonial twickenham june confident decision retire johnson times season playing tigers time feel time feel ph…	0	0	0	2	0	4	4	7	0	0	0	0	0	10	0	14	0	13	17
A November to remember Last Saturday, one newspaper proclaimed that England were still the number one side in the world. That statement was made to look a little foolish by events later that afternoon at Twickenham. But it illustrated the wonderful unpredictability of Test rugby at the highest level, at the end of a richly entertaining autumn series. The final weekend threw the world pecking orde…	rugby	november remember saturday newspaper proclaimed england statement foolish events afternoon twickenham illustrated wonderful unpredictability test rugby level richly entertaining autumn series final weekend threw pecking renewed confusion australia triumph london france capitulation zealand moment declared wallabies coach eddie jones arrival sydney competing level day difference bodes rugby sharpe…	0	0	0	2	0	4	4	7	0	7	8	11	11	8	13	14	17	15	0
South Africa sweep top awards South Africa's Schalk Burger was named player of the year as the Tri-Nations champions swept the top honours at the International Rugby Board's awards. The flanker topped a list which included Ireland star Gordon D'Arcy and Australian sensation Matt Giteau. Jake White claimed the coaching award while his side held off Grand Slam winners France to take the team award.…	rugby	south africa sweep top awards south africa schalk burger named player champions swept top honours international rugby board awards flanker topped list included ireland star gordon australian sensation matt giteau jake white claimed coaching award held grand slam winners france team award england player simon amor beat ben gollings argentine lucio lopez fleming win sevens award burger award week w…	1	0	0	2	0	4	4	7	0	0	0	0	0	10	4	14	9	13	17
Robinson wants dual code success England rugby union captain Jason Robinson has targeted dual code success over Australia on Saturday. Robinson, a former rugby league international before switching codes in 2000, leads England against Australia at Twickenham at 1430 GMT. And at 1815 GMT, Great Britain's rugby league team take on Australia in the final of the Tri-Nations tournament. "Beating the A…	rugby	robinson dual code success england rugby union captain jason robinson targeted dual code success australia saturday robinson rugby league international switching codes leads england australia twickenham gmt gmt britain rugby league team australia final tournament beating aussies games massive achievement league robinson england chance seal autumn international victory successive wins canada south…	0	0	0	2	0	4	4	7	0	0	0	0	0	0	0	14	0	0	17
All Black magic: New Zealand rugby Playing colours: All black The Haka and more! The All Blacks Charles John Munro discovered rugby at London's Christ College, and on his return to Nelson he staged New Zealand's first game. Nelson Town met Nelson College on 14 May, 1870, the Town triumphing by two goals to nil, instigating a game that would become a national obsession and come to dominate the cou…	rugby	black magic zealand rugby playing colours black haka blacks charles john munro discovered rugby london christ college return nelson staged zealand game nelson town met nelson college town triumphing goals nil instigating game national obsession dominate country sporting passions game appealed kiwi psyche spread native maoris finding empathy sport warrior ethos british team led ae stoddart toured …	0	0	0	2	0	4	4	7	0	7	8	11	11	10	13	15	17	13	0
WRU proposes season overhaul The Welsh Rugby Union wants to restructure the Northern Hemisphere season into four separate blocks. The season would start with the Celtic League in October, followed by the Heineken Cup in February and March, and the Six Nations moved to April and May. After a nine week break, the WRU then proposes a two-month period of away and home international matches. WRU chair…	rugby	wru proposes season overhaul welsh rugby union restructure northern hemisphere season separate blocks season start celtic league october heineken cup february march nations moved april week break wru proposes period international matches wru chairman david pickering structure player availability club country feel spectator respond impetus intensity rugby played continuously fragmented timetable o…	0	0	0	2	0	4	4	7	0	6	0	6	5	10	5	9	9	13	13
Wilkinson to lead England Fly-half Jonny Wilkinson has been named as England's new rugby union captain for the three November Tests. The 25-year-old Newcastle star takes over from Lawrence Dallaglio, who retired from internationals in August. England's acting head coach Andy Robinson said: "He is a natural leader, holds the respect of the squad and is a formidable talent on the pitch. "And he con…	rugby	wilkinson lead england jonny wilkinson named england rugby union captain november tests newcastle star takes lawrence dallaglio retired internationals august england acting head coach andy robinson natural leader holds respect squad formidable talent pitch consistently demonstrates energy commitment feel essential captain england robinson players squad feel comfortable calling england captain jon…	0	0	0	2	0	4	4	7	0	0	0	0	0	0	0	14	0	0	17
Hong Kong in 2011 World Cup bid Hong Kong is hoping to join Japan as co-host of the 2011 Rugby World Cup. Japan has applied to host the tournament on its own, with the aim of taking it outside rugby's traditional strongholds for the first time. But Hong Kong Rugby Football Union (HKRFU) chairman John Molloy has called for the territory to host one of the pools and a quarter-final. The Japanese Ru…	rugby	hong kong cup bid hong kong hoping join japan rugby cup japan applied host tournament aim rugby traditional strongholds time hong kong rugby football union hkrfu chairman john molloy called territory host pools japanese rugby football union jrfu receive formal presentation hkrfu stage hosting event jrfu secretary koji tokumasu examine proposal definitive form japan stiff competition form south af…	0	0	0	2	0	4	4	7	0	6	0	0	0	10	4	14	9	13	8
Dallaglio his own man to the end Controversy and Lawrence Dallaglio have never been very far away from each other throughout a glittering international career. Even the end of his nine-year career came out of the blue, just four days before the start of the season. But then Dallaglio has always been his own man. Ever since emerging onto the international scene Dallaglio has polarised opinions. To…	rugby	dallaglio controversy lawrence dallaglio glittering international career career blue days start season dallaglio emerging international scene dallaglio polarised opinions supporters england dallaglio wrong integral sustained period success england dallaglio crowning glory won rugby cup rival fans tended alternative view dallaglio epitome agreeable characteristics english rugby afraid speak mind r…	0	0	0	2	0	4	4	7	0	0	0	0	0	10	0	14	0	13	17
Wasps 31-37 Leicester Leicester withstood a stunning Wasps comeback to win a pulsating Heineken Cup encounter at the Causeway Stadium. The Tigers stormed 22-6 ahead within 18 minutes through tries from Lewis Moody, Geordan Murphy and Martin Corry. European champions Wasps fought back through a Josh Lewsey try and Mark van Gisbergen's boot, and they were level at 31-31 with five minutes remaining.…	rugby	wasps leicester leicester withstood stunning wasps comeback win pulsating heineken cup encounter causeway stadium tigers stormed ahead minutes lewis moody geordan murphy martin corry european champions wasps fought josh lewsey mark van gisbergen boot level minutes remaining visitors cool andy goode kicked tigers victory penalty drop goal closing moments desperate defence leicester wasps penalties…	0	0	0	2	0	4	4	7	0	0	0	0	0	0	0	14	0	0	17
Ireland 17-12 South Africa Ronan O'Gara scored all Ireland's points as the home side claimed only their second ever win over South Africa on an emotional day at Lansdowne Road. O'Gara's first-half try, poached after a quick tap-penalty, helped the Irish to a 8-3 lead at half-time. Three further O'Gara penalties extended Ireland's lead to 17-6 as the game entered the final quarter. Two Percy Montg…	rugby	ireland south africa ronan scored ireland claimed win south africa emotional day lansdowne road poached quick helped irish lead penalties extended ireland lead game entered final quarter percy montgomery penalties set frantic finish ireland held claim famous victory ireland led match tense closely fought aware threat posed south africans ireland pressed hard outset played impressive rugby searchi…	0	0	0	2	0	4	4	7	0	7	8	11	11	8	13	3	7	12	15
Ireland v USA (Sat) Saturday 20 November Lansdowne Road, Dublin 1300 GMT The Irish coach knows a repeat of the record 83-3 victory over the States in 2000 is not on the agenda and expects a real test at Lansdowne Road. "Their coach Tom Billups will have them very organised," said O'Sullivan. "They ran five tries past the French in the summer, so we will not take them for granted. We have guys com…	rugby	ireland usa sat saturday november lansdowne road dublin gmt irish coach repeat record victory agenda expects real test lansdowne road coach tom billups organised french summer granted guys coming team chomping bit irish team started south africa winger tommy bowe flanker denis leamy international debuts recalls david humphreys kevin maggs guy easterby eric miller marcus horan donnacha frank sheeh…	0	0	0	2	0	4	4	7	0	7	8	11	11	8	13	3	7	12	15
Ireland call up uncapped Campbell Ulster scrum-half Kieran Campbell is one of five uncapped players included in Ireland's RBS Six Nations squad. Campbell is joined by Ulster colleagues Roger Wilson and Ronan McCormack along with Connacht's Bernard Jackman and Munster's Shaun Payne. Gordon D'Arcy is back after injury while Munster flanker Alan Quinlan also returns to international consideration. "…	rugby	ireland call uncapped campbell ulster kieran campbell uncapped players included ireland rbs nations squad campbell joined ulster colleagues roger wilson ronan mccormack connacht bernard jackman munster shaun payne gordon injury munster flanker alan quinlan returns international consideration squad selected purely form lot players hands coach eddie told bbc sport kieran campbell players playing he…	0	0	0	2	0	4	4	7	0	7	8	11	11	10	13	3	7	12	15
Ireland 21-19 Argentina An injury-time dropped goal by Ronan O'Gara stole victory for Ireland from underneath the noses of Argentina at Lansdowne Road on Saturday. O'Gara kicked all of Ireland's points, with two dropped goals and five penalties, to give the home side a 100% record in their autumn internationals. An impressive Argentina appeared in control until the dying seconds. The Pumas shocke…	rugby	ireland argentina dropped goal ronan stole victory ireland underneath noses argentina lansdowne road saturday kicked ireland dropped goals penalties record autumn internationals impressive argentina appeared control dying pumas shocked irish federico aramburu felipe contepomi kicked sharper pumas ireland stages indiscipline allowed argentina leinster contepomi scoring minute straightforward penal…	0	0	0	2	0	4	4	7	0	7	8	11	11	8	13	3	7	12	15
England claim Dubai Sevens glory England beat Fiji 26-21 in a dramatic final in Dubai to win the first IRB Sevens event of the season. Having beaten Australia and South Africa to reach the final, England fell behind to an early try against Fiji. They then took charge with scores from Pat Sanderson, Kai Horstman, Mathew Tait and Rob Thirlby, but Fiji rallied to force a tense finale. Scotland were …	rugby	england claim dubai sevens glory england beat fiji dramatic final dubai win irb sevens event season beaten australia south africa reach final england fell fiji charge scores pat sanderson kai horstman mathew tait rob thirlby fiji rallied force tense finale scotland beaten samoa plate ireland lost tunisia shield final mike friday england matched opponents pace power skill final led neumi nanuku ma…	0	0	0	2	0	4	4	7	0	0	0	0	0	0	0	14	0	0	17
Barbarians 19-47 New Zealand New Zealand proved too strong for an Australian-dominated Barbarians to round off their unbeaten northern hemisphere tour with an easy win. Rico Gear ran in two of the All Blacks' seven tries in what was a predominantly second-string line-up. The Baa-Baas did threaten, scoring tries through Albert van den Bergh, Xavier Rush and Andrea Lo Cicero, but never looked like …	rugby	barbarians zealand zealand proved strong barbarians round unbeaten northern hemisphere tour easy win rico gear blacks threaten scoring albert van den bergh xavier rush andrea lo cicero looked winning black aaron mauger form boot adding blacks featured started weekend emphatic test victory france paris wallabies starting zealand coach graham henry quality performance experienced guys learnt player…	1	0	0	2	0	4	4	7	0	6	0	0	0	10	4	2	9	13	8
Dawson wins England squad recall Wasps scrum-half Matt Dawson has been recalled to England's training squad ahead of the RBS Six Nations and been reinstated in the Elite Player Squad. Coach Andy Robinson dropped Dawson for the autumn Tests after he missed training to film 'A Question of Sport.' "I always said I would consider bringing Matt back if I felt he was playing well," Robinson said. "He m…	rugby	dawson wins england squad recall wasps matt dawson recalled england training squad ahead rbs nations reinstated elite player squad coach andy robinson dropped dawson autumn tests missed training film question sport bringing matt playing robinson merits return current form newcastle centre mathew tait training squad honour train england tait burst contention forward sessions moment sunday game new…	0	0	0	2	0	4	4	7	0	0	0	0	0	0	0	14	0	0	17
Borders 19-20 Ulster Ulster clung on for a morale-boosting Celtic League win over bottom club Borders at Netherdale on Friday night. A late try by Borders substitute Jonny Weston had set up a dramatic finish, but the Scottish side could not complete the fightback. Ulster had led 20-6 with tries from Paul Steinmetz and Bryn Cunningham. But the Irish province failed to add to the tally in the secon…	rugby	borders ulster ulster clung celtic league win bottom club borders netherdale friday night late borders substitute jonny weston set dramatic finish scottish complete fightback ulster led paul steinmetz bryn cunningham irish province failed add tally half relieved win lift eighth table borders edged ahead penalty charlie hore hand visitors initiative gift calum macrae surrendered possession centre …	0	0	0	2	0	4	4	7	0	7	8	11	11	8	13	3	7	12	15
Lions blow to World Cup stars British and Irish Lions coach Clive Woodward says he is unlikely to select any players not involved in next year's RBS Six Nations Championship. World Cup winners Lawrence Dallaglio, Neil Back and Martin Johnson had all been thought to be in the frame for next summer's tour to New Zealand. "I don't think you can ever say never," said Woodward. "But I would have to ha…	rugby	lions blow cup stars british irish lions coach clive woodward select players involved rbs nations championship cup winners lawrence dallaglio neil martin johnson frame summer tour zealand woodward compulsive reason pick player international rugby dallaglio johnson retired international rugby months continue star club woodward key stress intend nations players international rugby key benchmark job…	0	0	0	2	0	4	4	7	0	6	0	0	0	10	4	14	9	13	8
Campbell to be Lions consultant Former government communications chief Alastair Campbell will act as a media consultant to Sir Clive Woodward's 2005 Lions on their tour to New Zealand. Campbell, who left Downing Street earlier this year, will advise on media strategy before and during the tour. "I hope I can contribute to the planning and preparation, and to ensuring the media and public get the …	rugby	campbell lions consultant government communications chief alastair campbell media consultant sir clive woodward lions tour zealand campbell left street earlier advise media strategy tour hope contribute planning preparation ensuring media public tour forward stages tour woodward decision call prime minister tony blair spin doctor springs deterioration media relations lions tour australia zealande…	0	0	0	2	0	6	7	6	1	6	0	0	0	10	4	2	9	13	8
Lions blow to World Cup winners British and Irish Lions coach Clive Woodward says he is unlikely to select any players not involved in next year's RBS Six Nations Championship. World Cup winners Lawrence Dallaglio, Neil Back and Martin Johnson had all been thought to be in the frame for next summer's tour to New Zealand. "I don't think you can ever say never," said Woodward. "But I would have to …	rugby	lions blow cup winners british irish lions coach clive woodward select players involved rbs nations championship cup winners lawrence dallaglio neil martin johnson frame summer tour zealand woodward compulsive reason pick player international rugby dallaglio johnson retired international rugby months continue star club woodward key stress intend nations players international rugby key benchmark j…	0	0	0	2	0	4	4	7	0	6	0	0	0	10	4	14	9	13	8
Wilkinson fit to face Edinburgh England captain Jonny Wilkinson will make his long-awaited return from injury against Edinburgh on Saturday. Wilkinson, who has not played since injuring his bicep on 17 October, took part in full-contact training with Newcastle Falcons on Wednesday. And the 25-year-old fly-half will start Saturday's Heineken Cup match at Murrayfield on the bench. But Newcastle dir…	rugby	wilkinson fit edinburgh england captain jonny wilkinson return injury edinburgh saturday wilkinson played injuring bicep october training newcastle falcons wednesday start saturday heineken cup match murrayfield bench newcastle director rugby rob andrew fine hope game stage missed england autumn internationals aggravating haematoma upper arm saracens subsequently replaced england captain jason ro…	0	0	0	2	0	4	4	7	0	0	0	0	0	0	0	14	0	0	17
Dallaglio eyeing Lions tour place Former England captain Lawrence Dallaglio still harbours hopes of a place on the British and Irish Lions tour to New Zealand. Lions coach Sir Clive Woodward has made it clear he will pick his squad to tour next summer based on form shown in the Six Nations championship. But Dallaglio, who called time on England earlier this year, said: "I assure you I wouldn't le…	rugby	dallaglio eyeing lions tour england captain lawrence dallaglio harbours hopes british irish lions tour zealand lions coach sir clive woodward pick squad tour summer based form nations championship dallaglio called time england earlier assure takes offer told daily telegraph dallaglio toured south africa lions forced knee injury trip australia ago concentrating club rugby prolonged international s…	0	0	0	2	0	4	4	7	0	6	0	0	0	10	4	14	9	13	8
Dawson set for new Wasps contract European champions Wasps are set to offer Matt Dawson a new deal. The 31-year-old World Cup winning scrum-half has impressed since joining the London side from Northampton this summer on a one-year contract. Wasps coach Warren Gatland told the Daily Mirror: "We have not yet offered Matt a new contract but we will be doing so. "I'm very happy with his contribution…	rugby	dawson set wasps contract european champions wasps set offer matt dawson deal cup winning impressed joining london northampton summer contract wasps coach warren gatland told daily mirror offered matt contract happy contribution play couple dawson played vital england cup win fallen favour coach andy robinson missing training session september hopes deal regain england rugby priority burning desi…	0	0	0	2	0	4	4	7	0	0	0	0	0	0	0	14	0	0	17
Healey targets England comeback Leicester wing Austin Healey hopes to use Sunday's return Heineken Cup clash with Wasps as a further springboard to an England recall for the Six Nations. Healey, who won 51 caps prior to the 2003 World Cup, has been in good form in the Tigers' resurgence this season. "I definitely still have ambitions to play for England," Healey told the BBC. "We will have to see…	rugby	healey targets england comeback leicester wing austin healey hopes sunday return heineken cup clash wasps springboard england recall nations healey won caps prior cup form tigers resurgence season ambitions play england healey told bbc previous autumn tests current squad feel healey played positions career reverted wing won england caps recovering trapped nerve sustained september relishing role …	0	0	0	2	0	4	4	7	0	0	0	0	0	0	0	14	0	0	17
Johnson rules out Lions tour Former England captain Martin Johnson will not be touring New Zealand with the Lions this summer. The 34-year-old will be playing in his own testimonial match against a Jonah Lomu XV on 4 June - the same day as the first game of the Lions tour. Johnson, who retired from the international game last year, has called a news conference on Monday to announce details of the…	rugby	johnson rules lions tour england captain martin johnson touring zealand lions summer playing testimonial match jonah lomu xv june day game lions tour johnson retired international game called news conference monday details match cup winner skippered lions toured times testimonial match played twickenham series events mark johnson career leicester england lions lions play matches bay plenty june r…	0	0	0	2	0	4	4	7	0	6	0	0	0	10	4	2	9	13	8
Wilkinson: Injuries toughened me England skipper Jonny Wilkinson insists his battle with injuries during 2004 has toughened him up mentally. The fly-half returned to action for Newcastle in their 13-10 Heineken Cup win at Edinburgh at the weekend after seven weeks out with a bicep problem. Wilkinson, who also endured an eight-month lay-off with a shoulder injury, said: "I was physically prepared …	rugby	wilkinson injuries toughened england skipper jonny wilkinson insists battle injuries toughened mentally returned action newcastle heineken cup win edinburgh weekend weeks bicep wilkinson endured shoulder injury physically prepared return mentally hard time feel mentally stronger played england country cup glory november admits rushed initial comeback september wilkinson plan push fast time prepar…	0	0	0	2	0	4	4	7	0	0	0	0	0	0	0	14	0	0	17
Gatland fears end of European run Wasps coach Warren Gatland said the defending champions could pay a heavy price for their slow starts against Heineken Cup opponents Leicester. Wasps are struggling to qualify for the next stage after the Tigers won both pool games between the two sides. "We just weren't strong enough, and that has happened two weeks in a row," said a disappointed Gatland, whose …	rugby	gatland fears european wasps coach warren gatland defending champions pay heavy price slow starts heineken cup opponents leicester wasps struggling qualify stage tigers won pool games strong happened weeks row disappointed gatland lie pool relying teams result biarritz leicester swept lead welford road sunday running winners lot character fighting leicester deserved win gatland wasps stages pool …	0	0	0	2	0	4	4	7	0	0	0	0	0	0	0	14	0	0	17
Kafer quits Saracens Saracens head coach Rod Kafer has resigned from the Premiership club. The 33-year-old Australian, who replaced Wayne Shelford in August 2003, has decided to stand down after a disappointing start to the season. Saracens have decided to promote from within, with rugby manager Steve Diamond named as Kafer's replacement. "Following talks about extending my contract, I came to th…	rugby	kafer quits saracens saracens head coach rod kafer resigned premiership club australian replaced wayne shelford august decided stand disappointing start season saracens decided promote rugby manager steve diamond named kafer replacement talks extending contract conclusion preference seek opportunities kafer light chief executive mark sinderberry decided club stand head coach mark board directors …	0	1	1	0	1	2	0	5	8	3	6	6	5	10	5	9	5	13	13
Kafer resigns as Saracens coach Saracens head coach Rod Kafer has resigned from the Premiership club. The 33-year-old Australian, who replaced Wayne Shelford in August 2003, has decided to stand down after a disappointing start to the season. Saracens have decided to promote from within, with rugby manager Steve Diamond named as Kafer's replacement. "Following talks about extending my contract, I…	rugby	kafer resigns saracens coach saracens head coach rod kafer resigned premiership club australian replaced wayne shelford august decided stand disappointing start season saracens decided promote rugby manager steve diamond named kafer replacement talks extending contract conclusion preference seek opportunities kafer light chief executive mark sinderberry decided club stand head coach mark board di…	0	1	1	0	1	2	0	5	8	3	6	6	5	10	5	9	5	13	13
Hurter flees Falcons nest for SA Newcastle tight-head prop Marius Hurter will end six years in the north-east when he returns to his native South Africa before the new year. Hurter, 34, has signed a deal to play Super 12 rugby with the Cats and then the Currie Cup with the Lions. He also wants to further his law studies, while his wife is expecting their first child in seven months. Falcons boss …	rugby	hurter flees falcons nest sa newcastle prop marius hurter returns native south africa hurter signed deal play super rugby cats currie cup lions law studies wife expecting child months falcons boss rob andrew losing marius blow recognise life hurter capped times springboks squad signed falcons played zurich premiership matches helping club lift powergen cup hurter remain contention falcons matches…	0	0	3	4	4	1	6	8	11	9	9	12	9	10	10	7	6	8	18
O'Shea to head up RFU Academies London Irish managing director Conor O'Shea is to leave the Exiles to take up a post as the Rugby Football Union's Director of Regional Academies. O'Shea will start his new role in the spring, monitoring players capable of developing into England internationals. "I look on this move to Twickenham as a huge challenge and one I simply could not turn down," O'Shea sai…	rugby	head rfu academies london irish managing director conor leave exiles post rugby football union director regional academies start role spring monitoring players capable developing england internationals move twickenham huge challenge simply potential moving academy network level excites enormously won caps ireland forced retire player series ankle operations exiles director rugby managing director…	0	0	0	2	0	4	4	7	0	0	0	0	0	10	0	14	0	13	17
Wasps thrown out of Powergen Cup Zurich Premiership champions Wasps have been disqualified from the Powergen Cup by the Rugby Football Union (RFU) for fielding an ineligible player. Hooker Jonny Barrett played in Wasps' sixth-round 43-33 win over Bristol last weekend even though he was cup-tied. The ruling by the RFU is unprecedented in English rugby and means Bristol will take Wasps' quarter-fin…	rugby	wasps thrown powergen cup zurich premiership champions wasps disqualified powergen cup rugby football union rfu fielding ineligible player hooker jonny barrett played wasps win bristol weekend ruling rfu unprecedented english rugby bristol wasps local rivals gloucester january wasps plans appeal decision club admitted mistake punishment clubs tournament wasps chief executive david davies time maj…	0	1	0	2	0	4	4	7	0	0	0	6	0	10	5	14	0	13	17
Wilkinson targets Ireland Jonny Wilkinson says he is "massively positive" about his chances of playing some part in the Six Nations. A knee injury has ruled him out of England's first two matches against Wales and France, but he is hoping to feature against Ireland on 27 February. "I'm coming on really well. The physios at England and Newcastle are as happy as they could possibly be at this point…	rugby	wilkinson targets ireland jonny wilkinson massively positive chances playing nations knee injury ruled england matches wales france hoping feature ireland february coming physios england newcastle happy england wilkinson played england cup final win injury left leg kicker play usual game knee injury happened half weeks ago limit set weeks half nations concentrating bit rehab free selection people…	0	0	0	2	0	4	4	7	0	0	0	0	0	0	0	14	0	0	17
Marshall set for Leeds move All Blacks scrum-half Justin Marshall has agreed a two-year contract to play for Leeds from next season. The 31-year-old has a release clause in his New Zealand contract which allows him to move after the 2005 Lions tour. "It is a really exciting challenge and something new for me," Marshall told BBC Sport. Leeds rugby director Phil Davies added: "Justin is a world cla…	rugby	marshall set leeds move blacks justin marshall agreed contract play leeds season release clause zealand contract move lions tour exciting challenge marshall told bbc sport leeds rugby director phil davies justin class player add greatly professionalism field marshall capped zealand time tests left blacks european tour november travel england captain barbarians international twickenham intent recl…	0	0	0	2	0	4	4	7	0	6	0	0	0	10	4	2	9	13	8
Scrum-half Williams rejoins Bath Bath have signed their former scrum-half Andy Williams on a short-term deal from the Neath-Swansea Ospreys. Wales international Williams, whose contract with the Welsh region was due to expire in June, has agreed a contract until the end of the season. With Martyn Wood's injury likely to keep him out until February, Bath need experienced back-up to Nick Walshe. Sa…	rugby	williams rejoins bath bath signed andy williams deal ospreys wales international williams contract welsh region expire june agreed contract season martyn wood injury february bath experienced nick walshe williams opportunity williams capped wales romania figure match squad monday zurich premiership match sale sharks lost ospreys starting zealander jason spice fallen pecking welsh region outstandi…	0	0	0	2	0	4	4	7	0	7	8	11	11	8	13	15	17	15	0
Bath faced with Tindall ultimatum Mike Tindall's agent has warned Bath they have until next week to improve their contract offer to the England man or risk losing him to a rival club. Dipo Alli says he has received an offer for Tindall which dwarfs Bath's deal and that two other clubs want to talk. "Mike does not want to go into the Six Nations worrying about where he will be playing his club rug…	rugby	bath faced tindall ultimatum mike tindall agent warned bath week improve contract offer england risk losing rival club dipo alli received offer tindall dwarfs bath deal clubs talk mike nations worrying playing club rugby season alli told guardian newspaper bath owner andrew brownsword happen tindall contract season understood brownsword unwilling break club salary structure accommodate demands al…	0	0	0	2	0	4	4	7	0	0	0	0	0	0	5	14	0	0	17
Tindall wants second opinion England centre Mike Tindall is to seek a second opinion before having surgery on a foot injury that could force him to miss the entire Six Nations. The Bath player was already out of the opener against Wales on 5 February because of a hand problem. "Mike had a specialist review on a fracture in his right mid foot," said England doctor Simon Kemp. "Before a final decis…	rugby	tindall opinion england centre mike tindall seek opinion surgery foot injury force entire nations bath player opener wales february hand mike specialist review fracture mid foot england doctor simon kemp final decision surgery medical teams decided specialist england coach andy robinson centre greenwood flanker richard hill jonny wilkinson games robinson expected england monday match millennium s…	0	0	0	2	0	4	4	7	0	0	0	0	0	0	0	14	0	0	17
Paris promise raises Welsh hopes Has there been a better Six Nations match than Saturday's epic in Paris? And can the Welsh revival continue all the way to a first Grand Slam since 1978? Those are the two questions occupying not just Wales supporters but rugby fans as a whole after a scintillating display in Paris. Welsh legend Mervyn Davies, a member of two of three Grand Slam-winning sides of t…	rugby	paris promise raises welsh hopes nations match saturday epic paris welsh revival continue grand slam questions occupying wales supporters rugby fans scintillating display paris welsh legend mervyn davies grand hailed performances decades martyn williams wales scorer day called surreal games played crestfallen france coach bernard laporte simply observed french half welsh half half red dragonhood …	0	0	0	2	0	4	4	7	0	7	8	11	11	8	13	15	17	15	0
Wales silent on Grand Slam talk Rhys Williams says Wales are still not thinking of winning the Grand Slam despite a third Six Nations win. "That's the last thing on our minds at the moment," said Williams, a second- half replacement in Saturday's 24-18 win over France in Paris. "We all realise how difficult a task it is to go up to Scotland and beat them. "We've come unstuck there a couple of tim…	rugby	wales silent grand slam talk rhys williams wales thinking winning grand slam nations win minds moment williams half replacement saturday win france paris realise difficult task scotland beat unstuck couple times focus game worry ireland beaten scotland captain gareth thomas ruled rest campaign broken thumb williams vying start championship kevin morgan favourite replace thomas leaving williams ha…	0	0	0	2	0	4	4	7	0	7	8	11	11	8	13	15	17	15	0
Sculthorpe wants Lions captaincy Paul Sculthorpe has admitted he would love to succeed Andy Farrell as Great Britain skipper if the Wigan star does switch codes to rugby union. Sculthorpe was vice-captain in the Tri-Nations, and took the St Helens captaincy from Chris Joynt last year. "I would definitely want the job - I make no bones about it," Sculthorpe told BBC Sport. "It's something I've alw…	rugby	sculthorpe lions captaincy paul sculthorpe admitted love succeed andy farrell britain skipper wigan star switch codes rugby union sculthorpe st helens captaincy chris joynt job bones sculthorpe told bbc sport gladly offered captained st helens challenge cup success footsteps farrell challenge andy hard follow confident gb team team lot players pushing sculthorpe rugby league understand farrell de…	0	0	0	2	0	4	4	7	0	6	0	6	5	10	5	14	9	13	13
Tigers wary of Farrell 'gamble' Leicester say they will not be rushed into making a bid for Andy Farrell should the Great Britain rugby league captain decide to switch codes. "We and anybody else involved in the process are still some way away from going to the next stage," Tigers boss John Wells told BBC Radio Leicester. "At the moment, there are still a lot of unknowns about Andy Farrell, not l…	rugby	tigers wary farrell leicester rushed bid andy farrell britain rugby league captain decide switch codes involved process stage tigers boss john told bbc radio leicester moment lot unknowns andy farrell medical situation gamble farrell persistent knee operation knee weeks ago expected months leicester saracens believed head list rugby union clubs signing farrell decides move game move union believe…	0	1	0	2	0	4	4	7	0	0	0	0	0	10	5	14	0	13	17
Farrell saga to drag on - Lindsay Wigan chairman Maurice Lindsay says he does not expect a quick solution to the on-going saga of captain Andy Farrell's possible switch to rugby union. Leicester and Saracens are leading the chase for the player, but Lindsay told the BBC it was not yet a done deal. "As well as the Rugby Football Union, the league, the individual club and the England coaching team …	rugby	farrell saga drag lindsay wigan chairman maurice lindsay expect quick solution saga captain andy farrell switch rugby union leicester saracens leading chase player lindsay told bbc deal rugby football union league individual club england coaching team quick decision service support prospect farrell switching codes main talking super league season bolt blue admitted lindsay loyal friend club quest…	0	1	1	0	1	4	0	7	0	0	0	6	5	10	5	9	5	13	13
England given tough Sevens draw England will have to negotiate their way through a tough draw if they are to win the Rugby World Cup Sevens in Hong Kong next month. The second seeds have been drawn against Samoa, France, Italy, Georgia and Chinese Taipei. The top two sides in each pool qualify but England could face 2001 winners New Zealand in the quarter-finals if they stumble against Samoa. Sco…	rugby	england tough sevens draw england negotiate tough draw win rugby cup sevens hong kong month seeds drawn samoa france italy georgia chinese taipei top pool qualify england winners zealand stumble samoa scotland ireland pool blacks england won event international rugby board sevens series dubai slipped fourth table failing build victory beat samoa los angeles sevens losing argentina england ability…	0	0	0	2	0	4	4	7	0	0	0	0	0	10	0	14	0	13	17
Wales hails new superstar One game into his Six Nations career, and Gavin Henson is already a Welsh legend. A mesmeric display against England, topped off by his howitzer of a match-winning penalty, has secured life membership of that particular club. At 23, Henson has the rugby world at his silver-booted feet. And if his natural self-assurance and swagger is shared by his Wales team-mates, then …	rugby	wales hails superstar game nations career gavin henson welsh legend mesmeric display england topped howitzer penalty secured life membership club henson rugby feet natural swagger shared wales revival lot hot air drifting valleys red dragonhood subdued red rose army field henson stellar performance ensured efforts yielded win craved announced game salvo cardiff greeting mark cueto gain defence ma…	0	0	0	2	0	4	4	7	0	7	8	11	11	8	13	15	17	15	0
Sydney to host north v south game Sydney will host a northern versus southern hemisphere charity match in June or July, the Australian Rugby Union (ARU) said on Wednesday. The match will include players from the Lions tour of New Zealand. "The Australian Rugby Union has thrown its support behind a proposed North-South match to raise funds for the tsunami appeals," the ARU said. The date is yet to…	rugby	sydney host north south game sydney host northern versus southern hemisphere charity match june july australian rugby union aru wednesday match players lions tour zealand australian rugby union thrown support proposed match raise funds tsunami appeals aru decided venue sydney olympic stadium aru chief executive gary flowers cricket charity match melbourne earlier month inspired aru options irb in…	1	0	0	2	0	4	4	7	0	6	0	0	0	10	4	2	9	13	8
Celts savour Grand Slam prospect The Six Nations has heralded a new order in northern hemisphere rugby this year and Wales and Ireland rather than traditional big guns France and England face a potential Grand Slam play-off in three weeks' time. But before that game in Cardiff, Wales must get past Scotland at Murrayfield, while Ireland face the not insignificant task of a home fixture with the me…	rugby	celts savour grand slam prospect nations heralded northern hemisphere rugby wales ireland traditional guns france england potential grand slam weeks time game cardiff wales scotland murrayfield ireland insignificant task fixture mercurial french mood france lansdowne road march sublime half wales ridiculous period england twickenham mighty fallen england sat rugby summit months ago champions gran…	0	0	0	2	0	4	4	7	0	7	8	11	11	8	13	15	17	15	0
Ireland win eclipses refereeing 'errors' The International Rugby Board may have to step in to stop frustrated coaches and players from publicly haranguing referees when things go belly-up. It may have to go the whole way and have NFL-style video cameras all over the field, or slap the vociferous perpetrators over the knuckles. What the IRB does not want is a football scenario where the verbal sla…	rugby	ireland win eclipses refereeing international rugby board step frustrated coaches players publicly haranguing referees video cameras field slap vociferous perpetrators knuckles irb football scenario verbal slanging matches overshadow game sunday explosive nations clash lansdowne road ireland step grand slam game exciting england enraged decisions understand frustration doubt ireland rub green vic…	0	0	0	2	0	4	4	7	0	0	0	0	0	0	0	3	0	0	17
Ireland 19-13 England Ireland consigned England to their third straight Six Nations defeat with a stirring victory at Lansdowne Road. A second-half try from captain Brian O'Driscoll and 14 points from Ronan O'Gara kept Ireland on track for their first Grand Slam since 1948. England scored first through Martin Corry but had "tries" from Mark Cueto and Josh Lewsey disallowed. Andy Robinson's men ha…	rugby	ireland england ireland consigned england straight nations defeat stirring victory lansdowne road captain brian ronan ireland track grand slam england scored martin corry mark cueto josh lewsey disallowed andy robinson lost matches cup final defeat heralded england worst championship ireland won title nations share top spot table maximum wales eddie banished ghosts england rampant victors claimin…	0	0	0	2	0	4	4	7	0	0	0	0	0	0	0	3	7	0	15
Fuming Robinson blasts officials England coach Andy Robinson said he was "livid" after his side were denied two tries in Sunday's 19-13 Six Nations loss to Ireland in Dublin. Mark Cueto's first-half effort was ruled out for offside before the referee spurned TV replays when England crashed over in the dying minutes. "[I'm] absolutely spitting. I'm livid. There's two tries we've been cost," Robins…	rugby	fuming robinson blasts officials england coach andy robinson livid denied sunday nations loss ireland dublin mark cueto effort ruled offside referee spurned tv replays england crashed dying minutes absolutely spitting livid cost robinson told bbc sport technology south african referee jonathan kaplan ruled cueto ahead charlie hodgson hoisted kick sale wing gather kaplan declined chance consult fo…	0	0	0	2	0	4	4	7	0	0	0	0	0	0	0	14	4	0	17
Scotland 18-10 Italy Six Chris Paterson penalties gave Scotland victory in a dour but clinical encounter against Italy at Murrayfield. Coach Matt Williams' side were outmuscled and outplayed in a tense first half but led 6-3 at the break. Paterson slotted four more second-half penalties and Scotland were denied a try when wing Sean Lamont's touchdown was ruled out for a forward pass. A late Andre…	rugby	scotland italy chris paterson penalties scotland victory dour clinical encounter italy murrayfield coach matt williams outmuscled outplayed tense half led break paterson slotted penalties scotland denied wing sean lamont touchdown ruled forward pass late andrea masi consolation italy chasing win nations scotland top exchanges quick lead boot paterson powerful azzurri pack eventually rumbled life …	0	0	0	2	0	4	4	7	0	7	8	11	11	8	13	3	7	12	15
Bortolami predicts dour contest Italy skipper Marco Bortolami believes Saturday's Six Nations contest against Scotland will be a scrappy encounter. With both sides looking for their first win of the championship, the third-round game at Murrayfield has been billed as a wooden-spoon decider. And Bortolami feels the Edinburgh contest could end up being a bruising battle of the packs. "It will not b…	rugby	bortolami predicts dour contest italy skipper marco bortolami believes saturday nations contest scotland scrappy encounter win championship game murrayfield billed decider bortolami feels edinburgh contest bruising battle packs pretty game teams desperate gain win lock forward italy recorded wins joined nations scotland italy stubborn display ireland losing outplayed impressive welsh rome time it…	0	0	0	2	0	4	4	7	0	7	8	11	11	8	13	3	7	12	15
O'Connell rejects Lions rumours Ireland and Munster lock Paul O'Connell has dismissed media reports linking him to the captaincy of the Lions tour to New Zealand this summer. O'Connell is rumoured to be among the front-runners for the job, but says he is totally focused on Sunday's Six Nations crunch clash with England. "I honestly don't think about these reports," he told BBC Sport. "The Lions t…	rugby	rejects lions rumours ireland munster lock paul dismissed media reports linking captaincy lions tour zealand summer rumoured job totally focused sunday nations crunch clash england honestly reports told bbc sport lions speculation newspaper talk ignore job annoys reading reports opposition locks imagine guy row play cringe international debut wales ago enjoying meteoric rise rugby shop window ref…	0	0	0	2	0	4	4	7	0	0	0	0	0	10	0	14	0	13	17
Taylor poised for Scotland return Simon Taylor has been named in the Scotland squad for Saturday's Six Nations clash with Italy. The 25-year-old number eight made a scoring return for Edinburgh at the weekend - his first game in a year for the capital side. Taylor suffered knee ligament damage playing against Ireland in Dublin in the 2004 Six Nations championship. "Simon is one of Scotland's trul…	rugby	taylor poised scotland return simon taylor named scotland squad saturday nations clash italy scoring return edinburgh weekend game capital taylor suffered knee ligament damage playing ireland dublin nations championship simon scotland class players huge bonus chris paterson brings dimension defence ability slow opposition ball key italy involved taylor english saracens weeks loan improve fitness …	0	0	0	2	0	4	4	7	0	7	8	11	11	8	13	3	7	12	15
Vickery upbeat about arm injury England prop Phil Vickery is staying positive despite a broken arm ruling him out of the RBS Six Nations. The 28-year-old fractured the radius in his right forearm during Gloucester's 17-16 win over Bath on Saturday. He will undergo an operation on Monday and is expected to be out for at least six weeks. He said: "This isn't an injury that will stop me from working…	rugby	vickery upbeat arm injury england prop phil vickery staying positive broken arm ruling rbs nations fractured radius forearm gloucester win bath saturday undergo operation monday expected weeks injury hard fitness elements lads operation afternoon fitness week frustrating positive game vickery spoke bath prop david barnes broke arm chat david barnes injury operation running week doubt involved ope…	0	0	0	2	0	4	4	7	0	0	0	0	0	0	0	14	0	0	17
Dominici backs lacklustre France Wing Christophe Dominici says France can claim another Six Nations Grand Slam despite two lacklustre wins so far against Scotland and England. The champions only just saw off the Scots in Paris, then needed England to self-destruct in last week's 18-17 win. "The English played better than us but lost, whereas we are still in the race for the Grand Slam," said Domi…	rugby	dominici lacklustre france wing christophe dominici france claim nations grand slam lacklustre wins scotland england champions scots paris england week win english played lost race grand slam dominici display perfect win grand slam ireland wales france ireland wales remain unbeaten rounds rbs nations celtic nations playing impressive rugby france wales stade de france february ireland dublin marc…	0	0	0	2	0	4	4	7	0	7	8	11	11	8	13	4	17	15	0
Llewellyn plans Wales retirement Wales record cap holder Gareth Llewellyn will retire from Test rugby at the end of the Six Nations. The veteran lock, who is 36 at the end of February, told BBC Wales Scrum V that it is time for him to bring down the curtain on his 92-cap Wales career. Llewellyn is on a one-season deal with French club side Narbonne, but said he may consider retiring from all rugb…	rugby	llewellyn plans wales retirement wales record cap holder gareth llewellyn retire test rugby nations veteran lock february told bbc wales scrum time bring curtain wales career llewellyn deal french club narbonne retiring rugby carry playing change career llewellyn narbonne keen stay decide stay ultimitely coaching coaching awards respect chance fellow locks robert sidoli brent cockbain scored satu…	0	0	0	2	0	4	4	7	0	7	8	11	11	8	13	15	17	15	0
England 17-18 France England suffered an eighth defeat in 11 Tests as scrum-half Dimitri Yachvili booted France to victory at Twickenham. Two converted tries from Olly Barkley and Josh Lewsey helped the world champions to a 17-6 half-time lead. But Charlie Hodgson and Barkley missed six penalties between them, while Yachvili landed six for France to put the visitors in front. England could have w…	rugby	england france england suffered eighth defeat tests dimitri yachvili booted france victory twickenham converted olly barkley josh lewsey helped champions lead charlie hodgson barkley missed penalties yachvili landed france visitors front england won game minutes left hodgson pushed easy drop goal opportunity wide dismal defeat england coming hard heels nations loss wales game france reach remarka…	0	0	0	2	0	4	4	7	0	0	0	0	0	0	0	4	0	0	17
Wilkinson to miss Ireland match England will have to take on Ireland in the Six Nations without captain and goal-kicker Jonny Wilkinson, according to his Newcastle boss Rob Andrew. Wilkinson - who had targeted the 27 February match for his international comeback - has been missed by England, not least for his goal-kicking. "Jonny's not fit yet," Falcons chief Andrew told BBC Radio Five Live. "He …	rugby	wilkinson ireland match england ireland nations captain jonny wilkinson newcastle boss rob andrew wilkinson targeted february match international comeback missed england jonny fit falcons chief andrew told bbc radio live wo fit dublin doubt fit scotland italy played england cup final succession injuries england lost nations games row wasted lead defeat france charlie hodgson olly barkley missed p…	0	0	0	2	0	4	4	7	0	0	0	0	0	0	0	14	0	0	17
Italy 8-38 Wales Wales secured their first away win in the RBS Six Nations for nearly four years with a six-try victory in Rome. Tries from Jonathan Thomas, Tom Shanklin and Martyn Williams gave the visitors a 19-5 half-time advantage. Luciano Orquera did reply with one for Italy but second-half efforts from Brent Cockbain, Shane Williams and Robert Sidoli sealed victory. Fly-half Stephen Jones a…	rugby	italy wales wales secured win rbs nations victory rome jonathan thomas tom shanklin martyn williams visitors advantage luciano orquera reply italy efforts brent cockbain shane williams robert sidoli sealed victory stephen jones conversions wales maintained superb start tournament starting confidence victory england visitors scored minutes diminutive wing shane williams fielded kick ahead danced o…	0	0	0	2	0	4	4	7	0	7	8	11	11	8	13	15	17	15	0
D'Arcy injury adds to Ireland woe Gordon D'Arcy has been ruled out of the Ireland team for Saturday's Six Nations clash against Scotland in Murrayfield. Like skipper Brian O'Driscoll, D'Arcy failed to recover from a hamstring injury. The side will now be led by Munster lock Paul O'Connell. Shane Horgan switches from wing to centre where he will be joined by Ulster's Kevin Maggs. Girvan Dempsey co…	rugby	injury adds ireland woe gordon ruled ireland team saturday nations clash scotland murrayfield skipper brian failed recover hamstring injury led munster lock paul shane horgan switches wing centre joined ulster kevin maggs girvan dempsey team wing spot gavin duffy called replacements gordon chance ireland coach eddie terms risk element precaution fine game tempt fate maggs win cap obvious replacem…	0	0	0	2	0	4	4	7	0	7	8	11	11	8	13	3	7	12	15
O'Driscoll out of Scotland game Ireland captain Brian O'Driscoll has been ruled out of Saturday's RBS Six Nations clash against Scotland. O'Driscoll was originally named in the starting line-up but has failed to recover from the hamstring injury he picked up in the win over Italy. His replacement will be named after training on Friday morning. Fellow centre Gordon D'Arcy is also struggling with a…	rugby	scotland game ireland captain brian ruled saturday rbs nations clash scotland originally named starting failed recover hamstring injury picked win italy replacement named training friday morning fellow centre gordon struggling hamstring injury undergo fitness test friday play kevin maggs obvious replacement centre shane horgan moved wing ulster wing tommy bowe travel squad scotland precautionary …	0	0	0	2	0	4	4	7	0	7	8	11	11	8	13	3	7	12	15
Tindall aiming to earn Lions spot Bath and England centre Mike Tindall believes he can make this summer's Lions tour, despite missing most of the season through injury. The World Cup winner has been out of action since December, having damaged both his shoulder and his foot. But Tindall, who recently signed for Bath's west-country rivals Gloucester, told Rugby Special he would be fit in time for …	rugby	tindall aiming earn lions spot bath england centre mike tindall believes summer lions tour missing season injury cup winner action december damaged shoulder foot tindall signed bath rivals gloucester told rugby special fit time tour zealand aiming fit april hope play spoken sir clive woodward understands situation hope tour stiff competition centre brian gordon gavin henson aware competition inte…	0	0	0	2	0	4	4	7	0	0	0	0	0	10	4	14	0	13	17
O'Connor aims to grab opportunity Johnny O'Connor is determined to make a big impression when he makes his RBS Six Nations debut for Ireland against Scotland on Saturday. The Wasps flanker replaces Denis Leamy but O'Connor knows that the Munster man will be pushing hard for a recall for the following game against England. "It's a 'horses for courses' selection really," said O'Connor. "There's a l…	rugby	aims grab opportunity johnny determined impression rbs nations debut ireland scotland saturday wasps flanker replaces denis leamy munster pushing hard recall game england courses selection lot competition drag heels picked definite battle leamy stone heavier role champions concerned impression winning cap missing italian game disappointing dwell parcel rugby denis playing deserved opportunity sit…	0	0	0	2	0	4	4	7	0	0	0	0	0	10	0	3	7	13	15
Man Utd stroll to Cup win Wayne Rooney made a winning return to Everton as Manchester United cruised into the FA Cup quarter-finals. Rooney received a hostile reception, but goals in each half from Quinton Fortune and Cristiano Ronaldo silenced the jeers at Goodison Park. Fortune headed home after 23 minutes before Ronaldo scored when Nigel Martyn parried Paul Scholes' free-kick. Marcus Bent miss…	football	utd stroll cup win wayne rooney winning return everton manchester united cruised fa cup rooney received hostile reception goals half quinton fortune cristiano ronaldo silenced jeers goodison park fortune headed minutes ronaldo scored nigel martyn parried paul scholes marcus bent missed everton chance roy carroll struck missile saved feet rooney return potential flashpoint involved angry exchange …	0	1	1	0	1	5	0	5	8	3	6	9	8	14	6	6	10	14	12
Van Nistelrooy set to return Manchester United striker Ruud van Nistelrooy may make his comeback after an Achilles tendon injury in the FA Cup fifth round tie at Everton on Saturday. He has been out of action for nearly three months and had targeted a return in the Champions League tie with AC Milan on 23 February. But Manchester United manager Sir Alex Ferguson hinted he may be back early. He sa…	football	van nistelrooy set return manchester united striker ruud van nistelrooy comeback achilles tendon injury fa cup round tie everton saturday action months targeted return champions league tie ac milan february manchester united manager sir alex ferguson hinted chance involved everton training training holland ferguson ruud tuesday assess training holland perfect satisfied van nistelrooy united wins …	0	1	1	0	1	5	0	5	8	3	6	9	8	14	6	6	10	14	12
Moyes U-turn on Beattie dismissal Everton manager David Moyes will discipline striker James Beattie after all for his headbutt on Chelsea defender William Gallas. The Scot initially defended Beattie, whose dismissal put Everton on the back foot in a game they ultimately lost 1-0, saying Gallas overreacted. But he has had a rethink after looking over the video evidence again. He said: "I believe t…	football	moyes beattie dismissal everton manager david moyes discipline striker james beattie headbutt chelsea defender william gallas scot initially defended beattie dismissal everton foot game ultimately lost gallas overreacted rethink video evidence set record straight conceding dismissal correct moyes comments saturday final whistle opportunity quick incident club website reported beattie unrepentant …	0	1	1	0	1	2	0	0	6	5	6	9	8	6	8	6	14	9	5
Ronaldo considering new contract Manchester United winger Cristiano Ronaldo said he is close to agreeing to a new contract at Old Trafford. The Portugal star, who joined in August 2003 on a five-year-deal, is a regular in the United first-team. "The United board have already made an offer to renew the contract but I'm trying not to think about it," he told the News of the World. "My agent has spo…	football	ronaldo contract manchester united winger cristiano ronaldo close agreeing contract trafford portugal star joined august regular united united board offer renew contract told news agent spoken club resolved reach agreement ronaldo refused commit future club tomorrow bigger clubs ambition club happy future	0	1	1	0	1	5	0	5	8	3	6	6	5	14	5	9	10	14	12
Smith keen on Home series return Scotland manager Walter Smith has given his backing to the reinstatement of the Home International series. Such a plan is to be proposed by the new chief executive of the Northern Irish FA, Howard Wells, at the next meeting of the four home countries. The English FA has expressed doubt as to whether the fixtures could be accommodated at the end of each season. But…	football	smith keen series return scotland manager walter smith reinstatement international series plan proposed chief executive northern irish fa howard meeting countries english fa expressed doubt fixtures accommodated season smith bringing add meaning friendly games international series traditional fixture continuing game smith delighted reinstated scotland england match highlight season italy friendly…	0	0	0	2	0	4	4	7	0	6	6	6	5	14	5	9	7	7	8
Mido makes third apology Ahmed 'Mido' Hossam has made another apology to the Egyptian people in an attempt to rejoin the national team. The 21-year-old told a news conference in Cairo on Sunday that he is sorry for the problems that have led to his exclusion from the Pharaohs since July last year. Mido said: "There isn't much I have to say today, all there is to say is that I came specially from …	football	mido apology ahmed hossam apology egyptian people attempt rejoin national team told news conference cairo sunday led exclusion pharaohs july mido specially england egypt rejoin national team apologise mistakes mido axed coach marco tardelli failing answer national claiming groin injury played friendly club roma hours cup qualifying match cameroon september mido play time national team matches top…	0	1	1	0	1	5	0	5	8	3	6	6	5	14	5	9	5	10	13
Man City 0-2 Man Utd Manchester United reduced Chelsea's Premiership lead to nine points after a scrappy victory over Manchester City. Wayne Rooney met Gary Neville's cross to the near post with a low shot, which went in via a deflection off Richard Dunne, to put United ahead. Seven minutes later, the unfortunate Dunne hooked a volley over David James' head and into his own net. Steve McManaman w…	football	city utd manchester united reduced chelsea premiership lead scrappy victory manchester city wayne rooney met gary neville cross post low shot deflection richard dunne united ahead minutes unfortunate dunne hooked volley david james head net steve mcmanaman wasted city chance shot wide yards half minutes united looked earn win maintain chance catching chelsea title race approach play laboured pati…	0	1	1	0	1	5	0	5	8	3	6	9	8	14	6	6	10	14	12
Gerrard plays down European hopes Steven Gerrard has admitted that Liverpool have little chance of winning the Champions League this season. The 24-year-old Reds skipper spoke out ahead of Tuesday's first leg at home to Bayer Leverkusen in the last 16, which he will miss through suspension. "Let's be realistic, there are some fantastic teams left in the Champions League," he told BBC Radio Five L…	football	gerrard plays european hopes steven gerrard admitted liverpool chance winning champions league season reds skipper spoke ahead tuesday leg bayer leverkusen suspension realistic fantastic teams left champions league told bbc radio live stay realise gerrard secret desire involved europe premier club competition season qualification champions league rumours persist leave anfield reds fail secure com…	0	1	1	0	1	2	0	0	5	5	5	10	7	5	15	0	8	16	6
Duff ruled out of Barcelona clash Chelsea's Damien Duff has been ruled out of Wednesday's Champions League clash with Barcelona at the Nou Camp. Duff sustained a knee injury in the FA Cup defeat at Newcastle and manager Jose Mourinho said: "He cannot run. His injury is very painful, so he is out." But Mourinho has revealed defender Willian Gallas and striker Didier Drogba will be in the starting …	football	duff ruled barcelona clash chelsea damien duff ruled wednesday champions league clash barcelona nou camp duff sustained knee injury fa cup defeat newcastle manager jose mourinho injury painful mourinho revealed defender willian gallas striker didier drogba starting blues boss unusual step naming day match jole cole named midfield mourinho session drogba play gallas play drogba trained monday tues…	0	1	1	0	1	2	0	0	6	5	6	9	8	6	8	6	14	9	5
Chelsea clinch cup in extra-time (after extra-time - score at 90 mins 1-1) John Arne Riise volleyed Liverpool ahead after 45 seconds but Steven Gerrard scored a 79th-minute own goal. Blues boss Jose Mourinho was sent off for taunting Liverpool fans after the goal and he watched on television as his side went on to win the game. Drogba and Kezman scored from close range before Antonio Nunez's head…	football	chelsea clinch cup score mins john arne riise volleyed liverpool ahead steven gerrard scored goal blues boss jose mourinho taunting liverpool fans goal watched television win game drogba kezman scored close range antonio nunez header tense finale amazing climax mourinho silverware chelsea manager controversial mourinho sending putting finger lips hush liverpool fans hushing extraordinary reds stu…	0	1	1	0	1	2	0	0	6	5	5	10	7	6	8	0	14	9	5
Newcastle 2-1 Bolton Kieron Dyer smashed home the winner to end Bolton's 10-game unbeaten run. Lee Bowyer put Newcastle ahead when he fed Stephen Carr on the right flank, then sprinted into the area to power home a header from the resultant cross. Wanderers hit back through Stelios Giannakopoulos, who ended a fluid passing move with a well-struck volley. But Dyer had the last word in a game of fe…	football	newcastle bolton kieron dyer smashed winner bolton unbeaten lee bowyer newcastle ahead fed stephen carr flank sprinted power header resultant cross wanderers hit stelios giannakopoulos fluid passing move volley dyer word game chances pouncing loose ball alan shearer shot blocked firing top corner lacked urgency stages game plenty tackles flying opportunities front goal harder bolton keeper jussi …	0	1	1	0	1	5	0	5	8	3	6	9	8	14	6	3	7	14	15
Middlesbrough 2-2 Charlton A late header by teenager Danny Graham earned Middlesbrough a battling draw with Charlton at the Riverside. Matt Holland had put the visitors ahead in the 14th minute after his shot took a deflection off Franck Queudrue. But Middlesbrough peppered the Charlton goal after the break and Chris Riggott stroked home the equaliser. Shaun Bartlett's strike put Charlton back in…	football	middlesbrough charlton late header teenager danny graham earned middlesbrough battling draw charlton riverside matt holland visitors ahead minute shot deflection franck queudrue middlesbrough peppered charlton goal break chris riggott stroked equaliser shaun bartlett strike charlton front lead lasted minutes graham rushed queudrue pass head match burst life whistle charlton defender hermann hreid…	0	1	1	0	1	5	0	5	8	3	6	9	8	14	6	3	7	12	15
Dundee Utd 4-1 Aberdeen Dundee United eased into the semi-final of the Scottish Cup with an emphatic win over Aberdeen. Alan Archibald prodded United ahead in 19 minutes and James Grady made it two from close range 10 minutes later. Richie Byrne's header gave Aberdeen a way back into the game, but Stevie Crawford restored United's lead from 18 yards before half time. The scoring was completed by …	football	dundee utd aberdeen dundee united eased scottish cup emphatic win aberdeen alan archibald prodded united ahead minutes james grady close range minutes richie byrne header aberdeen game stevie crawford restored united lead yards half time scoring completed grady break superb shot tony bullock united goal called action time clock noel whelan laid ball jamie winter edge box effort gathered united ke…	0	1	1	0	1	5	0	5	8	3	6	9	8	14	6	3	10	14	12
Clyde 0-5 Celtic Celtic brushed aside Clyde to secure their place in the Scottish Cup semi-final, but only after a nervy and testing first half. The home side's Craig Bryson had a goal chopped off before Stan Varga headed Celtic into the lead. Alan Thompson scored from the penalty spot at the start of the second half after Shaun Maloney had been fouled. Stilian Petrov slid in a third, Varga tappe…	football	clyde celtic celtic brushed clyde secure scottish cup nervy testing half craig bryson goal chopped stan varga headed celtic lead alan thompson scored penalty spot start half shaun maloney fouled stilian petrov slid varga tapped craig bellamy completed rout fine drive bryn halliwell busier keeper saving bellamy chris sutton juninho clyde ball net tremendous strike bryson referee blown foul petrov …	0	1	1	0	1	5	0	5	8	3	6	6	5	14	5	3	4	12	13
Hearts 2-1 Livingston Hearts wrapped up their Scottish Cup quarter-final tie against Livingston with two goals in the first 10 minutes. Lee Miller scored inside the opening 60 seconds, heading over Colin Meldrum and into the net from a Jamie McAllister free kick. McAllister himself scored the second when he met Saul Mikoliunas' cross at the back post to put the game beyond the visitors. Craig Eas…	football	hearts livingston hearts wrapped scottish cup tie livingston goals minutes lee miller scored inside heading colin meldrum net jamie mcallister free kick mcallister scored met saul mikoliunas cross post game visitors craig easton headed controversial goal hour hearts held goal gus bahoken clumsily fouled miller yards goal mcallister floated free kick livi box miller outjumped static visiting defen…	0	1	1	0	1	5	0	5	8	3	6	9	8	14	6	3	4	12	15
Kenyon denies Robben Barca return Chelsea chief executive Peter Kenyon has played down reports that Arjen Robben will return for the Champions League match against Barcelona. "He's been responding well to treatment and started running on Friday, but we'll have to wait and see," he told BBC Five Live's Sportsweek. "We're looking to getting him back as soon as possible, but he'll be back when it's …	football	kenyon denies robben barca return chelsea chief executive peter kenyon played reports arjen robben return champions league match barcelona responding treatment started running friday wait told bbc live sportsweek plans moment barcelona game comments contradict chiropractor jean pierre meersseman treated dutchman fractured foot start february robben expected weeks meersseman hinted winger fit vita…	0	1	1	0	1	2	0	0	6	5	6	9	8	6	8	6	14	9	5
Bridge could miss rest of season Chelsea left-back Wayne Bridge could miss the rest of the season with a suspected broken ankle. The England international, 24, was hurt in an innocuous challenge with Alan Shearer during the Londoners' FA Cup defeat at Newcastle on Sunday. "We think it's a big injury," said Jose Mourinho, whose Chelsea team this week meet Barcelona in the Champions League and Live…	football	bridge rest season chelsea wayne bridge rest season suspected broken ankle england international hurt innocuous challenge alan shearer londoners fa cup defeat newcastle sunday injury jose mourinho chelsea team week meet barcelona champions league liverpool carling cup final william gallas damien duff barcelona game france defender gallas ireland winger duff picked injuries closing stages chelsea …	0	1	1	0	1	2	0	0	6	5	6	9	8	6	8	6	14	9	5
Parry firm over Gerrard Listen to the full interview on Sport on Five and the BBC Sport website from 1900 GMT. But Parry, speaking exclusively to BBC Sport, also admits Gerrard, who has been constantly linked with Chelsea, will have the final say on his future. He told BBC Five Live: "Steven is above money. He is the future of Liverpool. "It doesn't matter if it's 拢30m, 拢40m or 拢50m, we will not …	football	parry firm gerrard listen interview sport bbc sport website gmt parry speaking exclusively bbc sport admits gerrard constantly linked chelsea final future told bbc live steven money future liverpool matter accept offers realistic steven subject liverpool finances parry revealed club ready explore possibility sponsorship deal proposed stadium responding criticism bbc sport pundit liverpool stalwar…	0	1	1	0	1	2	0	0	5	5	5	10	7	5	15	0	8	16	6
Wright-Phillips to start on right England coach Sven-Goran Eriksson has revealed Shaun Wright-Phillips will start against the Netherlands. But Wright-Phillips will not make his first start for England playing on the left, as had been widely expected. "Shaun Wright-Phillips will probably start the game," said Eriksson. "But I'm not going to start Wright-Phillips on the left." Eriksson also reveale…	football	start england coach eriksson revealed shaun start netherlands start england playing left expected shaun start game eriksson start left eriksson revealed wes brown start alongside jamie carragher centre defence brown carragher start eriksson replied blow central defenders injuries hand carragher brown level positive england coach impressed form manchester city deserves chance playing season forwar…	0	0	0	2	0	4	4	7	0	0	0	0	0	0	0	14	0	0	17
Robben sidelined with broken foot Chelsea winger Arjen Robben has broken two metatarsal bones in his foot and will be out for at least six weeks. Robben had an MRI scan on the injury, sustained during the Premiership win at Blackburn, on Monday. "Six weeks is the average time to heal this injury and then I need a few more weeks to be completely fit again," he told Dutch newspaper Algemeen Dagblad…	football	robben sidelined broken foot chelsea winger arjen robben broken metatarsal bones foot weeks robben mri scan injury sustained premiership win blackburn monday weeks average time heal injury weeks completely fit told dutch newspaper algemeen dagblad feeling swelling impossible final diagnosis missed months season injury challenge roma olivier dacourt summer injury foot walk days stayed sidelined pe…	0	1	1	0	1	2	0	0	6	5	6	9	8	6	8	6	14	9	5
Giggs handed Wales leading role Ryan Giggs will captain Wales as he wins his 50th cap in Wednesday's friendly against Hungary in Cardiff. John Toshack, in his first game as coach after succeeding Mark Hughes, admits he is surprised that Giggs has only just reached the landmark. "With the games he's played for United, proportionately it doesn't seem that many for Wales," Toshack said. "But he's on…	football	giggs handed wales leading role ryan giggs captain wales wins cap wednesday friendly hungary cardiff john toshack game coach succeeding mark hughes admits surprised giggs reached landmark games played united proportionately wales toshack welsh internationals cap captain giggs admits considered retirement international game targetting playing wales european championships manchester united wing rev…	0	1	1	0	1	5	0	5	8	3	6	6	5	14	6	15	10	14	12
Bosvelt optimistic over new deal Manchester City's Paul Bosvelt will find out "within a month" whether he is to be offered a new one-year deal. The 34-year-old Dutch midfielder is out of contract in the summer and, although his age may count against him, he feels he can play on for another season. "I told the club I would like to stay for one more year. They promised me an answer within the next …	football	bosvelt optimistic deal manchester city paul bosvelt month offered deal dutch midfielder contract summer age count feels play season told club stay promised answer month waiting main concern age proved fit bosvelt joined city feyenoord struggled adapt life england professionalism dedication impressed manager kevin keegan realised pace game faster drove team unsung hero keegan	0	1	1	0	1	5	0	5	8	3	6	6	5	14	5	9	5	14	13
Sociedad set to rescue Mladenovic Rangers are set to loan out-of-favour midfielder Dragan Mladenovic to Real Sociedad, despite the closure of the January transfer window. Sociedad have been given special permission by the Spanish FA to sign a player due to an injury crisis. Mladenovic will effectively replace former Rangers midfielder Mikel Arteta, who has been loaned to Everton. Sociedad say the…	football	sociedad set rescue mladenovic rangers set loan midfielder dragan mladenovic real sociedad closure january transfer window sociedad special permission spanish fa sign player injury crisis mladenovic effectively replace rangers midfielder mikel arteta loaned everton sociedad pay rangers option buy serbia montenegro international mladenovic loan move subject passing medical joined rangers red star …	0	1	1	0	1	5	0	5	8	3	6	6	5	14	5	9	5	10	13
Parry relishes Anfield challenge BBC Sport reflects on the future for Liverpool after our exclusive interview with chief executive Rick Parry. Chief executive Parry is the man at the helm as Liverpool reach the most crucial point in their recent history. Parry has to deliver a new 60,000-seat stadium in Stanley Park by 2007 amid claims of costs spiralling above 拢120m. He is also searching for an …	football	parry relishes anfield challenge bbc sport reflects future liverpool exclusive interview chief executive rick parry chief executive parry helm liverpool reach crucial history parry deliver stadium stanley park amid claims costs spiralling searching investment package size stature restore liverpool european football top table challenge appears sit easily parry forged reputation football respected …	0	1	1	0	1	2	0	0	5	5	5	10	7	5	15	0	8	16	6
Time to get tough on friendlies? For an international manager, a friendly provides an important opportunity to work with your players. The only problem is that the game itself can often be a farce. Some people have been saying it would be better to get the players together for the week, and do away with the 90 minutes at the end. I would say it's 50-50 whether you should have these games or not, …	football	time tough friendlies international manager friendly opportunity players game farce people players week minutes games club managers happy reduce risk players returning domestic duty injured international bosses scrapping friendlies counterproductive team playing play easier crunch games cup brazil friendlies manager play strongest minutes send half difficult player substitute team worth debate ra…	0	1	1	0	1	5	0	5	8	3	6	6	5	14	5	9	5	14	13
Barcelona title hopes hit by loss Barcelona's pursuit of the Spanish title took a blow on Sunday as they fell to a 2-0 defeat at home to Atletico Madrid. Fernando Torres gave Athletico an ideal start with a goal in the first minute. Ronaldino wasted a second-half chance to equalise for Barca when he put a penalty wide, but Torres made no such mistake with a last-minute spot-kick. The defeat, coup…	football	barcelona title hopes hit loss barcelona pursuit spanish title blow sunday fell defeat atletico madrid fernando torres athletico ideal start goal minute ronaldino wasted chance equalise barca penalty wide torres mistake defeat coupled real madrid win espanyol saturday reduces barca lead everton midfielder thomas gravesen scored goal real comfortable victory bernabeu zinedine zidane scoring raul b…	0	1	1	0	1	2	0	0	8	3	5	6	5	14	5	9	5	10	13
Parry puts Gerrard 'above money' Listen to the full interview on Sport on Five and the BBC Sport website from 1900 GMT. But Parry, speaking exclusively to BBC Sport, also admits Gerrard, who has been constantly linked with Chelsea, will have the final say on his future. He told BBC Five Live: "Steven is above money. He is the future of Liverpool. "It doesn't matter if it's 拢30m, 拢40m or 拢50m, we …	football	parry gerrard money listen interview sport bbc sport website gmt parry speaking exclusively bbc sport admits gerrard constantly linked chelsea final future told bbc live steven money future liverpool matter accept offers realistic steven subject liverpool finances parry revealed club ready explore possibility sponsorship deal proposed stadium responding criticism bbc sport pundit liverpool stalwa…	0	1	1	0	1	2	0	0	5	5	5	10	7	5	15	0	8	16	6
Bees handed potential Man Utd tie Brentford face a home tie against holders Manchester United in the FA Cup sixth round if they can come through their replay against Southampton. The League One side held the Saints at St Mary's in their fifth-round tie and were rewarded with a potential draw against Sir Alex Ferguson's side. Newcastle will be at home to either Tottenham or Nottingham Forest. Bolt…	football	bees handed potential utd tie brentford tie holders manchester united fa cup sixth round replay southampton league held saints st mary tie rewarded potential draw sir alex ferguson newcastle tottenham nottingham forest bolton host arsenal sheffield united leicester visit winners burnley blackburn replay ties played weekend march delighted paired united admitted plenty set dream tie cut tuesday de…	0	1	1	0	1	5	0	5	8	3	6	9	8	14	6	6	10	14	12
England's defensive crisis grows England's defensive worries have deepened following the withdrawal of Tottenham's Ledley King from the squad to face Holland. Chelsea's John Terry and Wayne Bridge are also out, leaving coach Sven-Goran Eriksson with a real problem for Wednesday's match at Villa Park. Injured Rio Ferdinand and Sol Campbell were both left out of the squad, and Matthew Upson has alr…	football	england defensive crisis grows england defensive worries deepened withdrawal tottenham ledley king squad holland chelsea john terry wayne bridge leaving coach eriksson real wednesday match villa park injured rio ferdinand sol campbell left squad matthew upson pulled wes brown jamie carragher makeshift partnership terry captain chelsea push premiership title starter absence campbell ferdinand pull…	0	1	1	0	1	4	0	7	6	0	0	0	0	0	0	14	0	0	17
Ferdinand casts doubt over Glazer Rio Ferdinand has said he is unsure of Malcolm Glazer's motives after the American billionaire launched a new offer to buy Manchester United. The club have confirmed that the Glazer Family Partnership have submitted proposals of a third bid. "A lot of people want the club's interest to be with people who have grown up with the club and have got its interests at h…	football	ferdinand casts doubt glazer rio ferdinand unsure malcolm glazer motives american billionaire launched offer buy manchester united club confirmed glazer family partnership submitted proposals bid lot people club people grown club heart ferdinand guy bringing table central defender bbc radio live wait glazer situation resolved people bored coming news proposals stuff pitch takes shine pitch glazer…	0	1	1	0	1	5	0	5	8	3	6	6	5	14	5	9	10	14	13
Premier League planning Cole date The Premier League is attempting to find a mutually convenient date to investigate allegations Chelsea made an illegal approach for Ashley Cole. Both Chelsea and Arsenal will be asked to give evidence to a Premier League commission, but no deadline has been put on when that meeting will convene. "It's hard to put a date on it," a Premier League spokesman confirme…	football	premier league planning cole premier league attempting mutually convenient investigate allegations chelsea illegal approach ashley cole chelsea arsenal evidence premier league commission deadline meeting convene hard premier league spokesman confirmed bbc sport formal situation time respond arsenal england defender cole reportedly met blues boss jose mourinho chief executive peter kenyon london h…	0	1	1	0	1	5	0	5	6	3	6	9	8	6	8	6	14	9	5
McCall earns Tannadice reprieve Dundee United manager Ian McCall has won a reprieve from the sack, with chairman Eddie Thompson calling for an end to speculation over his future. It is understood that McCall would have been sacked if Sheffield Wednesday manager Paul Sturrock had been willing to return to Tannadice. But Sturrock has distanced himself from the position. "We're in a difficult situat…	football	mccall earns tannadice reprieve dundee united manager ian mccall won reprieve sack chairman eddie thompson calling speculation future understood mccall sacked sheffield wednesday manager paul sturrock return tannadice sturrock distanced position difficult situation efforts current personnel thompson ian mccall detailed talk including current league position manner exit league cup continuing specu…	0	1	1	0	1	5	0	5	8	3	6	6	5	14	6	9	10	14	12
Kewell waits as injury drags on Liverpool winger Harry Kewell is struggling to recover from his Achilles tendinitis problem and may not recover until March, claims his agent. Kewell, 26, had hoped to play against Fulham last weekend and to be ready for the Champions League tie against Bayer Leverkusen on 22 February. But Bernie Mandic said: "He's had scans which don't show anything substantial. "…	football	kewell waits injury drags liverpool winger harry kewell struggling recover achilles tendinitis recover march claims agent kewell hoped play fulham weekend ready champions league tie bayer leverkusen february bernie mandic scans substantial efforts moment simply shake discomfort park mandic continued sydney morning herald harry struggling bit club harry desperate fit fulham game plan play leverkus…	0	1	1	0	1	2	0	0	5	5	5	10	7	5	15	0	8	16	6
Smith aims to bring back respect Scotland manager Walter Smith says he wants to restore the national team's respectability in world football. Smith has joined his first squad for a three-day get-together near Manchester in preference to playing a friendly. While qualification for the 2006 World Cup appears to be beyond Scotland, Smith is anxious that the remainder of the campaign should be positi…	football	smith aims bring respect scotland manager walter smith restore national team respectability football smith joined squad manchester preference playing friendly qualification cup appears scotland smith anxious remainder campaign positive bit respectability approach game approach italian game manner moldova meet challenge match smith meeting squad time brought monday outline ideas improving nation f…	0	0	1	0	1	5	0	5	8	3	6	6	5	14	5	9	10	14	12
Injury doubts beset Wales squad Wales have a clutch of injury worries before Wednesday's international friendly against Hungary in Cardiff. West Ham's Gavin Williams (ankle) looks certain to be out, so uncapped Wrexham defender Stephen Roberts is drafted in. Defenders Danny Gabbidon and Gareth Roberts, plus Ryan Giggs have hamstring concerns, while there are also doubts over Robbie Savage (groin)…	football	injury doubts beset wales squad wales clutch injury worries wednesday international friendly hungary cardiff west ham gavin williams ankle uncapped wrexham defender stephen roberts drafted defenders danny gabbidon gareth roberts ryan giggs hamstring concerns doubts robbie savage groin manchester united winger giggs expected recover time earn cap millennium stadium doubts gabbidon fellow cardiff d…	0	0	0	2	0	5	4	5	8	7	8	11	11	8	13	15	17	15	0
Weir poised for Sunderland move Larne's teenage star Robbie Weir is poised to join Sunderland after turning down a move to Stoke City. The 17-year-old Irish League midfielder was also being chased by Rangers and Fulham, but Mick McCarthy's side appear to have won the race. But Larne boss Jimmy McGeough has yet to confirm that Weir is on his way from Inver Park. "I heard on Sunday that he has join…	football	weir poised sunderland move larne teenage star robbie weir poised join sunderland move stoke city irish league midfielder chased rangers fulham mick mccarthy won race larne boss jimmy mcgeough confirm weir inver park heard sunday joined sunderland lad robbie agreement larne negotiate clubs personally impact local level build physique moving game trial clubs sunderland	0	1	1	0	1	5	0	5	8	3	6	6	5	14	5	9	5	14	13
Newry to fight cup exit in courts Newry City are expected to discuss legal avenues on Friday regarding overturning their ejection from the Nationwide Irish Cup. The IFA upheld its original decision to throw Newry out of the cup following the Andy Crawford registration row. ''A law firm will put a case forward for Newry FC, and see what the legal implications of all this is are,'' said Newry boss …	football	newry fight cup exit courts newry city expected legal avenues friday overturning ejection nationwide irish cup ifa upheld original decision throw newry cup andy crawford registration row law firm forward newry fc legal implications newry boss roy mccreadie issue appeal pending wednesday fresh ifa hearing crawford registration saga ruled week original verdict correct meant bangor beaten newry fiel…	0	1	1	0	1	5	0	5	4	3	6	6	5	14	5	9	5	10	13
Republic to face China and Italy The Republic of Ireland have arranged friendlies against China and Italy which will take place at Lansdowne Road in March and August. Brian Kerr's side will face the 54th ranked Chinese on 29 March - just three days after the World Cup qualifier against Israel in Tel Aviv. Italy will visit on 17 August in what will be a warm-up game ahead of the autumn World Cup q…	football	republic china italy republic ireland arranged friendlies china italy lansdowne road march august brian kerr ranked chinese march days cup qualifier israel tel aviv italy visit august game ahead autumn cup qualifiers meeting irish beat italy cup finals republic victory attempts italians won games march game time republic played china previous encounter june irish winning sapporo japan brian kerr …	0	0	0	2	0	4	4	7	0	7	8	11	11	8	13	3	7	12	15
Finnan says Irish can win group Steve Finnan believes the Republic of Ireland can qualify directly for the World Cup finals. After Saturday's superb display in the draw in Paris, Ireland face minnows the Faroe Islands in Dublin on Wednesday. The versatile Finnan, who starred against the French, is confident the group is Ireland's for the taking. "There is a chance for us now to go on, win our hom…	football	finnan irish win steve finnan believes republic ireland qualify directly cup finals saturday superb display draw paris ireland minnows faroe islands dublin wednesday versatile finnan starred french confident ireland chance win games win tough liverpool player switzerland ireland france israel tied matches republic slight edge claiming draws basel paris basel play football teams majority game pari…	0	0	0	2	0	4	4	7	0	7	8	11	11	8	13	3	7	12	15
Irish finish with home game Republic of Ireland manager Brian Kerr has been granted his wish for a home game as the final World Cup qualifier. Ireland will close their bid to reach the 2006 finals by playing Switzerland in Dublin on 12 October 2005. The Republic met the Swiss in their final Euro 2004 qualifier, losing 2-0 away and missing out on a place in the finals in Portugal. The Group Four f…	football	irish finish game republic ireland manager brian kerr granted game final cup qualifier ireland close bid reach finals playing switzerland dublin october republic met swiss final euro qualifier losing missing finals portugal fixtures hammered meeting dublin tuesday irish campaign september cyprus wrap series october visit switzerland manager brian kerr fai officials met representatives switzerland…	0	0	0	2	0	4	4	7	0	7	8	11	11	8	13	3	7	12	15
Israeli club look to Africa Four African players, including Zimbabwe goalkeeper Energy Murambadoro, are all ready to play for Israeli club Hapoel Bnei Sakhnin in the Uefa Cup. Bnei Sakhnin are the first Arab side ever to play in European competition and will play English Premiership side Newcastle United in the first round. Warriors' goalkeeper Murambadoro, who made a name for himself at the Afri…	football	israeli club africa african players including zimbabwe goalkeeper energy murambadoro ready play israeli club hapoel bnei sakhnin uefa cup bnei sakhnin arab play european competition play english premiership newcastle united round warriors goalkeeper murambadoro african nations cup finals tunisia helped bnei sakhnin overcome albania partizani tirana previous round murambadoro moved israel stint so…	0	1	1	0	1	5	0	5	8	3	6	6	5	14	5	9	5	14	13
Iranian misses Israel match Iranian striker Vahid Hashemian will not travel to Israel for Bayern Munich's Champions League match against Maccabi Tel Aviv on Wednesday. The German club said the player had pulled out because of a back injury. Iran refuses to recognise Israel's right to exist and does not allow its citizens to travel to the country. A Bayern spokesman said on Monday that the decisio…	football	iranian misses israel match iranian striker vahid hashemian travel israel bayern munich champions league match maccabi tel aviv wednesday german club player pulled injury iran refuses recognise israel exist citizens travel country bayern spokesman monday decision hashemian israel motivated physical condition pain train spokesman sense iran judo champion arash miresmaeili reward refused fight isra…	0	2	2	0	3	3	3	2	10	8	10	3	13	11	12	11	11	11	11
Highbury tunnel players in clear The Football Association has said it will not be bringing charges over the tunnel incident prior to the Arsenal and Manchester United game. Arsenal's Patrick Vieira had earlier denied accusations that he threatened Gary Neville before the 4-2 defeat. Vieira also clashed with opposing skipper Roy Keane and referee Graham Poll had to separate them. "The referee has …	football	highbury tunnel players football association bringing charges tunnel incident prior arsenal manchester united game arsenal patrick vieira earlier denied accusations threatened gary neville defeat vieira clashed opposing skipper roy keane referee graham poll separate referee confirmed satisfied dealt incident time fa statement united win pass intervention governing body chief executive brian barwi…	0	1	1	0	1	5	0	5	8	3	6	9	8	14	6	6	10	14	12
Bellamy under new fire Newcastle boss Graeme Souness has reopened his dispute with Craig Bellamy after claiming the Welshman was "not good enough" for the Magpies. Bellamy left Newcastle to join Celtic on loan after a major row with Souness. Souness - who refused to refer to the 25-year-old by name - said Bellamy did not score enough goals "The chap that's just gone has scored 9.3 goals a season …	football	bellamy fire newcastle boss graeme souness reopened dispute craig bellamy claiming welshman magpies bellamy left newcastle join celtic loan major row souness souness refused refer bellamy score goals chap scored goals season time senior football half top flight souness striker club strikers goals regular basis bellamy move birmingham favour joining celtic disagreement welsh international playing …	0	1	1	0	1	5	0	5	8	3	6	6	5	14	5	9	5	14	13
Chelsea denied by James heroics A brave defensive display, led by keeper David James, helped Manchester City hold the leaders Chelsea. After a quiet opening, James denied Damien Duff, Jiri Jarosik and Mateja Kezman, while Paul Bosvelt cleared William Gallas' header off the line. Robbie Fowler should have scored for the visitors but sent his header wide. Chelsea had most of the possession in the s…	football	chelsea denied james heroics brave defensive display led keeper david james helped manchester city hold leaders chelsea quiet james denied damien duff jiri jarosik mateja kezman paul bosvelt cleared william gallas header robbie fowler scored visitors header wide chelsea possession half james frank lampard superbly tipped player volley wide city game record domestic team beat chelsea season alarm …	0	1	1	0	1	2	0	0	6	5	6	9	8	6	8	6	14	9	5
Chelsea ridiculed over complaint Barcelona assistant coach Henk Ten Cate has branded Chelsea's expected complaint to Uefa as "pathetic". The Blues are poised to complain about an alleged half-time incident during Wednesday's 2-1 loss at the Nou Camp. The source of Chelsea's anger was an alleged talk between Barca boss Frank Rijkaard and referee Anders Frisk, who later dismissed Didier Drogba. "To…	football	chelsea ridiculed complaint barcelona assistant coach henk ten cate branded chelsea expected complaint uefa pathetic blues poised complain alleged incident wednesday loss nou camp source chelsea anger alleged talk barca boss frank rijkaard referee anders frisk dismissed didier drogba react chelsea pathetic mourinho lied ten cate uefa tunnel representative witnessed unusual ordinary break spokesma…	0	1	1	0	1	2	0	0	6	5	6	9	8	6	8	6	14	9	5
Benitez issues warning to Gerrard Liverpool manager Rafael Benitez has ordered captain Steven Gerrard not to play down their Champions League ambitions and be more positive. Gerrard told the BBC Liverpool were unlikely to win the trophy this year. Benitez responded: "I spoke to Steven and said to him that in future it's better to think we can win the Champions League. Why not?" He said: "We need …	football	benitez issues warning gerrard liverpool manager rafael benitez captain steven gerrard play champions league ambitions positive gerrard told bbc liverpool win trophy benitez responded spoke steven future win champions league winners thinking winning win benitez lose solutions winning game draw win game draw strong injuries suspensions benitez hoping win trophy arriving liverpool valencia play che…	0	1	1	0	1	2	0	0	5	5	5	10	7	5	15	0	8	16	6
Owen determined to stay in Madrid England forward Michael Owen has told the BBC he is happy in Spain and has no plans to quit Real Madrid to return to the Premiership in the near future. But the 25-year-old, who has spent much of his time coming off the bench in La Liga, did not rule out a return to the Premiership at some stage. "I'm pleased with the start I've made here," he told BBC Radio Five…	football	owen determined stay madrid england forward michael owen told bbc happy spain plans quit real madrid return premiership future spent time coming bench la liga rule return premiership stage pleased start told bbc radio live england country playing owen moved bernabeu liverpool summer grabbed goals real unable replace raul ronaldo starting delighted time spain dismissed criticism decision join real…	0	1	1	0	1	2	0	0	5	5	5	6	5	5	5	9	5	10	13
Wenger handed summer war chest Arsenal boss Arsene Wenger has been guaranteed transfer funds to boost his squad the summer. The club's managing director, Keith Edelman, stressed that the development of their new 拢350m stadium had no affect on Wenger's spending power. "The money is there. Don't worry we've got it," Edelman told BBC Sport. "Hopefully, we'll spend it this summer and in the coming ye…	football	wenger handed summer war chest arsenal boss arsene wenger guaranteed transfer funds boost squad summer club managing director keith edelman stressed development stadium affect wenger spending power money worry edelman told bbc sport spend summer coming arsene attends board meetings finances strong edelman pointless brand stadium team match surroundings nice surroundings team performing pitch resp…	0	1	1	0	1	5	0	5	8	3	6	6	5	14	5	9	3	14	14
Souness delight at Euro progress Boss Graeme Souness felt Newcastle were never really in danger of going out of the Uefa Cup against Heerenveen. An early own goal followed by an Alan Shearer strike earned them a 2-1 win and a place in the Uefa Cup last 16. "Obviously with winning in the first leg it gave us a great advantage," he said after the 4-2 aggregate victory. "We got our goals early and i…	football	souness delight euro progress boss graeme souness newcastle danger uefa cup heerenveen goal alan shearer strike earned win uefa cup winning leg advantage aggregate victory goals minds players job goal bit nervous shearer goal moved jackie milburn club scoring record magpies souness beating record bearing decision retire season stay struck ball power pace beat goalkeeper souness paid tribute laure…	0	1	1	0	1	5	0	5	8	3	6	6	5	14	5	9	5	14	13
Downing injury mars Uefa victory Middlesbrough boss Steve McClaren hopes that Stewart Downing did not seriously damage his hamstring during the 2-1 Uefa Cup win over Graz AK. The winger was carried off on a stretcher in the closing stages as Boro booked their place in the last 16. McClaren said: "Stewart has tweaked a hamstring, which is a blow for us. We will assess it in the morning. "But I'm d…	football	injury mars uefa victory middlesbrough boss steve mcclaren hopes stewart damage hamstring uefa cup win graz ak winger carried stretcher closing stages boro booked mcclaren stewart tweaked hamstring blow assess morning delighted match result sport win ugly mcclaren relieved tough encounter riverside fair graz gameplan knocked ball forward half struggled deal half frustrating goal slip boro sportin…	0	1	1	0	1	5	0	5	8	3	6	6	5	14	6	9	5	14	13
Rangers seal Old Firm win Goals from Gregory Vignal and Nacho Novo gave Rangers a scrappy victory at Celtic Park that moves them three points clear of the champions. Rangers had rarely threatened until Celtic goalkeeper Rab Douglas let defender Vignal's 25-yard drive slip through his grasp and into the net. Opposite number Ronald Waterreus had been Rangers' hero, saving superbly from Craig Bellam…	football	rangers seal firm win goals gregory vignal nacho novo rangers scrappy victory celtic park moves champions rangers rarely threatened celtic goalkeeper rab douglas defender vignal drive slip grasp net opposite ronald waterreus rangers hero saving superbly craig bellamy john hartson striker novo secured victory lobbing douglas minutes remaining celtic unbeaten firm derbies rangers manager alex mclei…	0	1	1	0	1	5	0	5	8	3	6	6	5	14	5	9	5	14	13
SFA awaits report over Mikoliunas The Scottish Football Association is awaiting referee Hugh Dallas's report before acting against Hearts winger Saulius Mikoliunas. Mikoliunas, 20, barged linesman Andy Davis, who had advised Dallas to award Rangers an injury-time penalty in Hearts's 2-1 defeat at Tynecastle. "He was sent off for violent conduct in the 90th minute but we don't know if he did somet…	football	sfa awaits report mikoliunas scottish football association awaiting referee hugh dallas report acting hearts winger saulius mikoliunas mikoliunas barged linesman andy davis advised dallas award rangers penalty hearts defeat tynecastle violent conduct minute whistle red cards sfa statement hearts action fans arrested throwing coins pitch rangers striker dad prso incident received yellow card wrest…	0	1	1	0	1	5	0	5	8	3	6	6	5	14	6	3	4	14	15
Palace threat over Cantona masks Manchester United fans wearing Eric Cantona masks will not be allowed in Selhurst Park on Saturday. United fans are planning to mark the 10th anniversary of Cantona's infamous kung-fu kick on Crystal Palace fan Matthew Simmons by wearing the masks. But Palace stadium manager Kevin Corner has warned: "If they wear them inside Selhurst Park they will be immediately …	football	palace threat cantona masks manchester united fans wearing eric cantona masks allowed selhurst park saturday united fans planning mark anniversary cantona infamous kick crystal palace fan matthew simmons wearing masks palace stadium manager kevin corner warned wear inside selhurst park rejected safety grounds fans wearing cantona masks allowed entry stadium united fans declared saturday day plann…	0	1	1	0	1	5	0	5	8	3	6	6	5	14	6	9	10	14	12
Legendary Dutch boss Michels dies Legendary Dutch coach Rinus Michels, the man credited with developing "total football", has died aged 77. Referred to in the Netherlands as "the General", Michels led the Dutch at the 1974 World Cup - when they reached the final only to lose 2-1 to Germany. However, he guided his side to the 1988 European Championship title with a 2-0 win over the Soviet Union in…	football	legendary dutch boss michels dies legendary dutch coach rinus michels credited developing total football died aged referred netherlands michels led dutch cup reached final lose germany guided european championship title win soviet union final michels played ajax coached national titles european cup dutch team built johan cruyff johan neeskens introduced concept football strategy foster team coher…	0	1	1	0	1	5	0	5	8	3	6	6	5	14	5	9	4	10	13
Jol joy at 'professional' Cup win Tottenham manager Martin Jol acclaimed his players for their patience in their 3-0 FA Cup fifth-round victory over a determined Nottingham Forest side. "We had the initiative but it wasn't easy. It was a professional sort of performance," the Dutchman said. "Forest played with a lot of players behind the ball in the first half, but at 2-0 they were dead and burie…	football	jol joy cup win tottenham manager martin jol acclaimed players patience fa cup victory determined nottingham forest initiative easy professional sort performance dutchman forest played lot players ball half dead buried ahead jol newcastle difficult magpies premiership afraid robbie keane skipper night scorer crucial goal echoed manager sentiments match confident games played win conceded win fore…	0	1	1	0	1	5	0	5	8	3	6	6	5	14	6	9	10	14	12
Owen delighted with Real display Michael Owen revelled in his return to the to the Real Madrid starting line-up and inspired a 3-1 win over Real Betis on Wednesday by scoring the first goal. He said: "I am happy I could play a game from the start again. "I felt good all though the game and it is obvious that I am happy to have scored another goal. "People have talked a lot about my performances a…	football	owen delighted real display michael owen revelled return real madrid starting inspired win real betis wednesday scoring goal happy play game start game obvious happy scored goal people talked lot performances months owen starting successive la liga match converted low cross santiago solari robert carlos break smashing indirect midfielder reduced deficit ivan helguera headed keeper antonio doblas …	0	1	1	0	1	2	0	0	5	5	5	6	5	5	5	9	5	10	13
Ferguson fears Milan cutting edge Manchester United manager Sir Alex Ferguson said his side's task against AC Milan would not be made any easier by the absence of Andriy Shevchenko. Milan's talismanic European footballer of the year misses Wednesday's Champions League first-leg tie after fracturing his cheekbone. "It's a loss (to Milan), but it could be worse if they didn't have such quality to b…	football	ferguson fears milan cutting edge manchester united manager sir alex ferguson task ac milan easier absence andriy shevchenko milan talismanic european footballer misses wednesday champions league tie fracturing cheekbone loss milan worse quality bring ferguson tomorrow night ferguson milan front represent formidable challenge defenders play rui costa play kaka forward bring serginho play jon dahl…	0	1	1	0	1	5	0	5	8	3	6	9	8	14	6	6	10	14	12
Rush future at Chester uncertain Ian Rush's future as Chester manager is uncertain after he and assistant Mark Aizlewood refused a severance package. Chester have won only two of their last 10 League games but Chairman Steve Vaughan claims he cannot afford to sack the 43-year-old Liverpool legend. Vaughan said: "I offered a financial settlement so they could resign with dignity but an obvious act…	football	rush future chester uncertain ian rush future chester manager uncertain assistant mark aizlewood refused severance package chester won league games chairman steve vaughan claims afford sack liverpool legend vaughan offered financial settlement resign dignity obvious action dismiss finances technically employees vaughan claimed aizlewood verbally agreed offer chester chairman discussed offer solic…	0	1	1	0	1	2	0	0	5	5	5	10	7	5	15	0	8	16	6
Reyes tricked into Real admission Jose Antonio Reyes has added to speculation linking him with a move from Arsenal to Real Madrid after falling victim to a radio prank. The Spaniard believed he was talking to Real Madrid sporting director Emilio Butragueno when he allegedly berated his team-mates as "bad people". "I wish I was playing for Real Madrid," the 21-year-old told Cadena Cope. "Hopefully…	football	reyes tricked real admission jose antonio reyes speculation linking move arsenal real madrid falling victim radio prank spaniard believed talking real madrid sporting director emilio butragueno allegedly berated bad people playing real madrid told cadena cope happen love madrid play happy striker joined gunners seville start frequently reported homesick season superb form struggled maintain stand…	0	1	1	0	1	2	0	5	8	3	6	6	5	14	5	9	5	10	13
Benitez joy as Reds take control Liverpool boss Rafael Benitez was satisfied after his team's 3-1 win over Bayer Leverkusen despite conceding a goal in the last minute. "Before the game if you had said the score will be 3-1 I would have happily accepted that," said Benitez. "But you must realise that you have to concentrate right to the very last seconds of a game at this level. "I have confidenc…	football	benitez joy reds control liverpool boss rafael benitez satisfied team win bayer leverkusen conceding goal minute game score happily accepted benitez realise concentrate game level confidence complete task germany confident positive benitez defended goalkeeper jerzy dudek failure hold dimitar berbatov weak drive allowed franca score kick game german team lifeline leg jerzy dudek fault benitez play…	0	1	1	0	1	2	0	0	5	5	5	10	7	5	15	0	8	16	6
Souness eyes summer move for Owen Newcastle boss Graeme Souness is lining up a summer move for England and Real Madrid striker Michael Owen. He sees Owen as the ideal replacement for Alan Shearer, who is due to retire in the summer, although he hopes to persuade Shearer to carry on. "Michael is in the category of players who would excite the fans and we're monitoring him," he told BBC Newcastle. …	football	souness eyes summer move owen newcastle boss graeme souness lining summer move england real madrid striker michael owen owen ideal replacement alan shearer retire summer hopes persuade shearer carry michael category players excite fans monitoring told bbc newcastle monitoring situation real souness hinted shearer carry stated intent retire season believes prospect breaking jackie milburn club sco…	0	1	1	0	1	2	0	5	8	3	5	6	5	14	5	9	5	10	13
Wenger dejected as Arsenal slump Arsenal manager Arsene Wenger claimed their display in the 3-1 defeat against Bayern Munich was "our worst peformance in the Champions League". Kolo Toure's late goal gives the Gunners hope for the second leg, but Wenger said: "The only positive is that we are still in the tie. "The players are really down in the dressing-room. I feel we really turned in a bad per…	football	wenger dejected arsenal slump arsenal manager arsene wenger claimed display defeat bayern munich worst peformance champions league kolo toure late goal gunners hope leg wenger positive tie players feel bad performance faced real struggle chance goalscorer toure fault goals wenger toure rebuild confidence low moment wenger stay upbeat adding time crying cry easier life job bad nights bad night con…	0	1	1	0	1	5	0	5	8	3	6	9	8	14	6	6	3	14	14
Stam spices up Man Utd encounter AC Milan defender Jaap Stam says Manchester United "know they made a mistake" by selling him in 2001. The sides meet at Old Trafford in the Champions League game on Wednesday and the 32-year-old's Dutchman's presence is sure to add spice to the fixture. "United made a mistake in selling me," Stam told Uefa's Champions magazine. "I was settled at Manchester United,…	football	stam spices utd encounter ac milan defender jaap stam manchester united mistake selling meet trafford champions league game wednesday dutchman presence add spice fixture united mistake selling stam told uefa champions magazine settled manchester united sell club sell sold cattle sir alex ferguson surprised football stam selling dutchman lazio august decision shortly stam claimed autobiography fer…	0	1	1	0	1	5	0	5	8	3	6	6	8	14	6	6	10	14	12
Mourinho defiant on Chelsea form Chelsea boss Jose Mourinho has insisted that Sir Alex Ferguson and Arsene Wenger would swap places with him. Mourinho's side were knocked out of the FA Cup by Newcastle last Sunday before seeing Barcelona secure a 2-1 Champions League first-leg lead in the Nou Camp. But he denied his club was suffering a dip in form which league rivals Arsenal and Manchester Unite…	football	mourinho defiant chelsea form chelsea boss jose mourinho insisted sir alex ferguson arsene wenger swap mourinho knocked fa cup newcastle sunday barcelona secure champions league lead nou camp denied club suffering dip form league rivals arsenal manchester united exploit speak blips position mourinho change positions top league carling cup final position fa cup champions league teams team position…	0	1	1	0	1	2	0	0	6	5	6	9	8	6	8	6	14	9	5
Hodgson relishes European clashes Former Blackburn boss Roy Hodgson says the Premiership should follow the rest of Europe and have a winter break - but insists that a gruelling domestic schedule will not damage the English elite's bid for Champions League glory. Hodgson - now in charge at Viking Stavanger - was at Liverpool's clash with Bayer Leverkusen at Anfield on Tuesday as a member of Uefa's…	football	hodgson relishes european clashes blackburn boss roy hodgson premiership follow rest europe winter break insists gruelling domestic schedule damage english elite bid champions league glory hodgson charge viking stavanger liverpool clash bayer leverkusen anfield tuesday uefa technical committee hodgson fierce advocate winter break employed europe england champions league contenders ploughed heavy …	0	1	1	0	1	2	0	0	0	5	6	6	5	0	5	6	14	9	5
Coach Ranieri sacked by Valencia Claudio Ranieri has been sacked as Valencia coach just eight months after taking charge at the Primera Liga club for the second time in his career. The decision was taken at a board meeting following the side's surprise elimination from the Uefa Cup. "We understand, and he understands, that the results in the last few weeks have not been the most appropriate," sai…	football	coach ranieri sacked valencia claudio ranieri sacked valencia coach months charge primera liga club time career decision board meeting surprise elimination uefa cup understand understands weeks club president juan bautista assistant antonio lopez coach italian ranieri valencia job june replaced chelsea jose mourinho spanish champions extended winless streak losing racing santander weekend defeat …	0	1	1	0	1	2	0	0	6	5	6	6	5	6	8	6	14	9	5
Cole faces lengthy injury lay-off Aston Villa's Carlton Cole could be out for six weeks with a knee injury. The striker, who is on a season-long loan from Chelsea, picked up the knock in an England Under-21 match against Holland earlier this month. "Carlton will be out of action for four to six weeks after a bad challenge," said Villa boss David O'Leary. "I won't be able to tell you whether he wi…	football	cole lengthy injury aston villa carlton cole weeks knee injury striker loan chelsea picked knock england match holland earlier month carlton action weeks bad challenge villa boss david wo operation week operation left chelsea cole struggled ankle earlier season unable rest shortage strikers return fitness darius vassell months broken ankle emergence luke moore alleviated villa manager department	0	1	1	0	1	5	0	5	6	3	6	9	8	6	8	6	14	9	5
Arsenal through on penalties Arsenal win 4-2 on penalties The Spanish goalkeeper saved from Alan Quinn and Jon Harley as Arsenal sealed a quarter-final trip to Bolton with a 4-2 victory on penalties. Lauren, Patrick Vieira, Freddie Ljungberg and Ashley Cole scored for Arsenal, while Andy Gray and Phil Jagielka were on target for the Blades. Michael Tonge and Harley wasted chances for the underdog…	football	arsenal penalties arsenal win penalties spanish goalkeeper saved alan quinn jon harley arsenal sealed trip bolton victory penalties lauren patrick vieira freddie ljungberg ashley cole scored arsenal andy gray phil jagielka target blades michael tonge harley wasted chances underdogs paddy kenny inspired arsenal bay arsenal stripped attacking talent thierry henry dennis bergkamp partnered italian s…	0	1	1	0	1	5	0	5	8	3	6	9	8	14	6	6	3	14	14
Ajax refuse to rule out Jol move Ajax have refused to reveal whether Tottenham's boss Martin Jol is on the Dutch champions' shortlist to become the Amsterdam club's new coach. Jol, who has coached in his native Holland, has guided Spurs to the Premiership's top eight. An Ajax spokesman told BBC Sport: "The coach must fit our profile - a coach who understands the Dutch league and offensive and dis…	football	ajax refuse rule jol move ajax refused reveal tottenham boss martin jol dutch champions shortlist amsterdam club coach jol coached native holland guided spurs premiership top ajax spokesman told bbc sport coach fit profile coach understands dutch league offensive distinctive football solution season ronald koeman quit ajax boss week exit uefa cup jol linked vacant post ajax reports fallen spurs s…	0	1	1	0	1	5	0	5	8	3	6	6	5	14	5	9	4	14	13
Unclear future for striker Baros Liverpool forward Milan Baros is uncertain whether he remains part of boss Rafa Benitez's plans after being dropped for the Carling Cup final. Baros, who is Liverpool's leading scorer this season, denied reports of a row with Benitez but claims he is mystified at being left on the bench. He told Czech newspaper Daily Sport: "I don't know why I didn't play on Sunda…	football	unclear future striker baros liverpool forward milan baros uncertain remains boss rafa benitez plans dropped carling cup final baros liverpool leading scorer season denied reports row benitez claims mystified left bench told czech newspaper daily sport play sunday argue disappointed thinking leaving czech international substitute minutes prevent losing chelsea baros denied suggestions leave mille…	0	1	1	0	1	2	0	0	5	5	5	10	7	5	15	0	8	16	6
Prutton poised for lengthy FA ban Southampton's David Prutton faces a possible seven-match ban when he goes before the Football Association. The 23-year-old has admitted two charges of improper conduct following his dismissal against Arsenal. The first charge relates to his failure to leave the field promptly, pushing referee Alan Wiley and remonstrating with assistant referee Paul Norman. And th…	football	prutton poised lengthy fa ban southampton david prutton ban football association admitted charges improper conduct dismissal arsenal charge relates failure leave field pushing referee alan wiley remonstrating assistant referee paul norman charge threatening behaviour match official draw paolo di canio suspension pushed referee paul alcock premiership game sheffield wednesday arsenal prutton joine…	0	1	1	0	1	5	0	5	8	3	6	9	8	14	6	6	4	14	14
Robben plays down European return Injured Chelsea winger Arjen Robben has insisted that he only has a 10% chance of making a return against Barcelona in the Champions League. The 21-year-old has been sidelined since breaking a foot against Blackburn last month. Chelsea face Barcelona at home on 8 March having lost 2-1 in the first leg. And Robben told the Daily Star: "It is not impossible that I …	football	robben plays european return injured chelsea winger arjen robben insisted chance return barcelona champions league sidelined breaking foot blackburn month chelsea barcelona march lost leg robben told daily star impossible play barcelona chance robben inspirational player chelsea season switch psv einhoven summer recovery expected weeks ago barcelona game wo risks	0	1	1	0	1	2	0	0	6	5	6	9	8	6	8	6	14	9	5
Adriano's Chelsea link rejected Adriano's agent Gilmar Rinaldi has insisted that he has had no contact with Chelsea over the striker. Chelsea were reported to have made inquiries about Inter Milan's 22-year-old Brazilian star. Rinaldi told BBC Sport from Rio de Janeiro: "I can assure you that Chelsea have had no dealings whatsoever with either me or Adriano. "Parma and Real Madrid are interested …	football	adriano chelsea link rejected adriano agent gilmar rinaldi insisted contact chelsea striker chelsea reported inquiries inter milan brazilian star rinaldi told bbc sport rio de janeiro assure chelsea dealings whatsoever adriano parma real madrid time adriano scored goals serie appearances season chelsea boss jose mourinho claimed milan talking adriano day alleged held clandestine meeting arsenal d…	0	1	1	0	1	2	0	0	6	5	6	9	8	6	8	6	14	9	5
FA decides not to punish Mourinho The Football Association will take no action against Chelsea boss Jose Mourinho following his sending-off in Sunday's Carling Cup final. Mourinho, who was sent from the touchline for appearing to taunt Liverpool fans, has been "reminded of his responsibilities to the game". But the FA confirmed: "There will be no further action taken in this matter." Mourinho cla…	football	fa decides punish mourinho football association action chelsea boss jose mourinho sunday carling cup final mourinho touchline appearing taunt liverpool fans reminded responsibilities game fa confirmed action matter mourinho claimed gesture aimed media ground porto coach forced watch climax victory liverpool television ushered touchline fourth official phil crossley gesture chelsea equaliser minut…	0	1	1	0	1	2	0	0	6	5	6	9	8	6	8	6	14	9	5
Aragones angered by racism fine Spain coach Luis Aragones is furious after being fined by The Spanish Football Federation for his comments about Thierry Henry. The 66-year-old criticised his 3000 euros (拢2,060) punishment even though it was far below the maximum penalty. "I am not guilty, nor do I accept being judged for actions against the image of the sport," he said. "I'm not a racist and I've…	football	aragones angered racism fine spain coach luis aragones furious fined spanish football federation comments thierry henry criticised euros punishment maximum penalty guilty accept judged actions image sport racist lacked sporting decorum medals sporting merit aragones handed fine tuesday racist remarks henry arsenal spanish international jose reyes october spanish football federation declined actio…	0	1	1	0	1	5	0	5	8	3	6	6	5	14	6	9	3	14	14
Boro suffer Morrison injury blow Middlesbrough midfielder James Morrison has been ruled out for up to eight weeks after an operation on Tuesday. The 18-year-old, who has played in 13 of the club's last 14 games, had surgery to repair a double hernia. A club spokesman confirmed: "It is a bilateral sportsman's hernia, which was operated on yesterday." Morrison was sent for scans after being substit…	football	boro suffer morrison injury blow middlesbrough midfielder james morrison ruled weeks operation tuesday played club games surgery repair double hernia club spokesman confirmed bilateral sportsman hernia operated yesterday morrison scans substituted boro uefa cup win graz ak scored equaliser injury blow teessiders gaizka mendieta george boateng mark viduka extended periods time boro uefa cup match …	0	1	1	0	1	5	0	5	8	3	6	6	5	14	5	9	5	14	13
Mourinho receives Robson warning Sir Bobby Robson has offered Chelsea boss Jose Mourinho some advice on coping under pressure. The pair worked together at Barcelona and Porto and Robson had a word of warning for his protege. "It has all gone for him just lately and that is marvellous, but sometimes you have to have a bit of humility and learn how to lose," said Robson. "It is when it goes against…	football	mourinho receives robson warning sir bobby robson offered chelsea boss jose mourinho advice coping pressure pair barcelona porto robson word warning protege marvellous bit humility learn lose robson bit bad luck learn straight robson speaking formally granted freedom city newcastle jose moment robson pot follow game barcelona losing lead premiership position expect win wonderful achievement occur…	0	1	1	0	1	2	0	0	6	5	6	9	8	6	8	6	14	9	5
QPR keeper Day heads for Preston Queens Park Rangers keeper Chris Day is set to join Preston on a month's loan. Day has been displaced by the arrival of Simon Royce, who is in his second month on loan from Charlton. QPR have also signed Italian Generoso Rossi. R's manager Ian Holloway said: "Some might say it's a risk as he can't be recalled during that month and Simon Royce can now be recalled b…	football	qpr keeper day heads preston queens park rangers keeper chris day set join preston month loan day displaced arrival simon royce month loan charlton qpr signed italian generoso rossi manager ian holloway risk recalled month simon royce recalled charlton irons fire couple day rangers contract expires summer holloway hoping complete signing middlesbrough defender andy davies permanently loan saturda…	0	1	1	0	1	5	0	5	8	3	6	6	5	14	5	9	5	14	13
Cudicini misses Carling Cup final Chelsea goalkeeper Carlo Cudicini will miss Sunday's Carling Cup final after the club dropped their appeal against his red card against Newcastle. The Italian was sent off for bringing down Shola Ameobi in the final minute of Sunday's match. Blues boss Jose Mourinho had promised to pick Cudicini for the final instead of first-choice keeper Petr Cech. The 31-year-…	football	cudicini misses carling cup final chelsea goalkeeper carlo cudicini sunday carling cup final club dropped appeal red card newcastle italian bringing shola ameobi final minute sunday match blues boss jose mourinho promised pick cudicini final keeper petr cech serve suspension commencing cudicini club record clean sheets season chelsea petr cech established choice mourinho moving stamford bridge su…	0	1	1	0	1	2	0	0	6	5	6	9	8	6	8	6	14	9	5
Beattie return calms attack fears Everton striker James Beattie has been declared fit for training on Tuesday, despite suffering an alleged assault last Saturday. Beattie, 27, is not believed to be as seriously hurt as some reports have suggested after being "the victim of an unprovoked assault" in Birmingham. He was on a night out with his girlfriend and two friends following Everton's 3-1 win o…	football	beattie return calms attack fears everton striker james beattie declared fit training tuesday suffering alleged assault saturday beattie believed hurt reports suggested victim unprovoked assault birmingham night girlfriend friends everton win aston villa shaken badly injured everton spokesman ian ross speak police pressing charges spoken manager david moyes happened beattie suspended win aston vi…	0	1	1	0	1	2	0	0	5	5	6	9	8	5	5	9	10	10	13
Keegan hails comeback king Fowler Manchester City boss Kevin Keegan has praised striker Robbie Fowler for his landmark return to form. The 29-year-old, out of favour at City earlier this season, took his Premiership goal tally past 150 with a brace in Monday's 3-2 win at Norwich. "He is still a quality player and knows where the net is - we have just got to supply him with ammunition and, in the …	football	keegan hails comeback king fowler manchester city boss kevin keegan praised striker robbie fowler landmark return form favour city earlier season premiership goal tally brace monday win norwich quality player net supply ammunition keegan hard liverpool striker moved city poor stint leeds battled contention struggling fitness start season fowler overtook les ferdinand tuesday evening scorer time p…	0	1	1	0	1	5	0	5	8	3	6	6	5	14	5	9	5	14	13
Thompson says Gerrard should stay Liverpool legend Phil Thompson has pleaded with Steve Gerrard to reject any overtures from Chelsea. The ex-Reds assistant boss also warned that any honours won at Chelsea would be cheapened by the bid to buy success. He told BBC Radio Five Live: "Liverpool would think about any bid made but it will all be down to Steve in the end. "But it wouldn't have that same …	football	thompson gerrard stay liverpool legend phil thompson pleaded steve gerrard reject overtures chelsea assistant boss warned honours won chelsea cheapened bid buy success told bbc radio live liverpool bid steve sweet feeling chelsea simply buying thompson reacted sharply liverpool supporters criticised gerrard performance carling cup final chelsea fans questioned gerrard commitment sarcastically bra…	0	1	1	0	1	2	0	0	5	5	5	10	7	5	15	0	8	16	6
Cole refuses to blame van Persie Ashley Cole has refused to blame Robin van Persie for leaving Arsenal with no fully-fit strikers for the FA Cup fifth round replay at Sheffield United. Van Persie is suspended alongside Dennis Bergkamp and Jose Antonio Reyes after being sent off at Southampton when Arsenal had a numerical advantage. Thierry Henry is ruled out with an Achilles tendon injury but Col…	football	cole refuses blame van persie ashley cole refused blame robin van persie leaving arsenal strikers fa cup round replay sheffield united van persie suspended alongside dennis bergkamp jose antonio reyes southampton arsenal numerical advantage thierry henry ruled achilles tendon injury cole putting blame robin spur moment cole hope blame learn couple times bit crazy freddie ljungberg emergency strik…	0	1	1	0	1	5	0	5	8	3	6	9	8	14	6	6	3	14	14
Blackburn v Burnley Ewood Park Tuesday, 1 March 2000 GMT Howard Webb (South Yorkshire) home to Leicester in the quarter-finals But defender Andy Todd is suspended and could be replaced by Dominic Matteo - if he recovers from a hamstring injury. Burnley have major injury concerns over Frank Sinclair and John McGreal. Michael Duff looks set to continue at right-back with John Oster in midfield and …	football	blackburn burnley ewood park tuesday march gmt howard webb south yorkshire leicester defender andy todd suspended replaced dominic matteo recovers hamstring injury burnley major injury concerns frank sinclair john mcgreal michael duff set continue john oster midfield micah hyde expected recover knee injury blackburn boss mark hughes burnley resolute individual talent expect progress comfortable g…	0	1	1	0	1	5	0	5	8	3	6	6	8	14	6	6	10	14	12
Brentford v Southampton Griffin Park Tuesday, 1 March 1945 GMT Barry Knight (Kent) home to Manchester United in the quarter-finals Midfielder Andrew Frampton and striker Deon Burton are both slight doubts with hamstring injuries, but should be fit Saints are missing their entire first-choice midfield of Jamie Redknapp, Graeme Le Saux, Nigel Quashie and David Prutton. Anders Svensson and Matt Oakl…	football	brentford southampton griffin park tuesday march gmt barry knight kent manchester united midfielder andrew frampton striker deon burton slight doubts hamstring injuries fit saints missing entire midfield jamie redknapp graeme le saux nigel quashie david prutton anders svensson matt oakley replacements kevin phillips scheduled start henri camara rested brentford boss martin allen conceding goals m…	0	1	1	0	1	5	0	5	8	3	6	6	8	14	6	6	10	14	12
Desailly backs Blues revenge trip Marcel Desailly insists there is no chance of history repeating itself when Chelsea take on Barcelona on Wednesday. The French star was part of the Chelsea side crushed 5-1 at the Nou Camp in the Champions League quarter-final second leg in 2000. "Things will be totally different this time," he told BBC Sport. "Now everyone knows about Chelsea and is a little bit…	football	desailly blues revenge trip marcel desailly insists chance history repeating chelsea barcelona wednesday french star chelsea crushed nou camp champions league leg totally time told bbc sport chelsea bit afraid major clubs europe pressure barcelona chelsea played barcelona tie ago blues looked destined progress winning leg stamford bridge courtesy goals tore andre flo gianfranco zola collapsed leg…	0	1	1	0	1	2	0	0	6	5	6	9	8	6	8	6	14	9	5
Desailly backs Blues revenge trip Marcel Desailly insists there is no chance of history repeating itself when Chelsea take on Barcelona on Wednesday. The French star was part of the Chelsea side crushed 5-1 at the Nou Camp in the Champions League quarter-final second leg in 2000. "Things will be totally different this time," he told BBC Sport. "Now everyone knows about Chelsea and is a little bit…	football	desailly blues revenge trip marcel desailly insists chance history repeating chelsea barcelona wednesday french star chelsea crushed nou camp champions league leg totally time told bbc sport chelsea bit afraid major clubs europe pressure barcelona chelsea played barcelona tie ago blues looked destined progress winning leg stamford bridge courtesy goals tore andre flo gianfranco zola collapsed leg…	0	1	1	0	1	2	0	0	6	5	6	9	8	6	8	6	14	9	5
Mourinho expects fight to finish Chelsea manager Jose Mourinho expects the Champions League clash with Barcelona to be a fight to the finish. Mourinho is relishing the first leg of the tie against his former club in the last 16 in the Nou Camp. He said: "I wouldn't be surprised if nothing had been decided by the last minute of the return leg and the match had to go into extra time. "I have to def…	football	mourinho expects fight finish chelsea manager jose mourinho expects champions league clash barcelona fight finish mourinho relishing leg tie club nou camp surprised decided minute return leg match extra time defend mine champions league mine moment manager won mourinho coached barcelona assisting sir bobby robson louis van gaal envious insisting jealous barcelona history won european cup managing…	0	1	1	0	1	2	0	0	6	5	6	9	8	6	8	6	14	9	5
Cup holders Man Utd visit Everton Holders Manchester United and Premiership leaders Chelsea both face difficult away ties against Premiership opposition in the FA Cup fifth round. United were drawn against Everton, while Chelsea face a trip to Newcastle. Brentford and Hartlepool - the only sides left from outside the top two divisions - will replay for the right to travel to Southampton. Burnley'…	football	cup holders utd visit everton holders manchester united premiership leaders chelsea difficult ties premiership opposition fa cup round united drawn everton chelsea trip newcastle brentford hartlepool left top divisions replay travel southampton burnley reward tie lancashire rivals blackburn tie manchester united everton return teenage striker wayne rooney club time acrimonious move nottingham for…	0	1	1	0	1	5	0	5	8	3	6	9	8	14	6	6	10	14	12
Candela completes Bolton switch Bolton boss Sam Allardyce has signed Roma defender Vincent Candela on a five-month deal. The 31-year-old former France international gave his last press conference as a Roma player on Monday, anouncing his move to Bolton. "I have signed a five-month contract with Bolton," said Candela, who will travel to England on Tuesday. "In June I will decide whether to continu…	football	candela completes bolton switch bolton boss sam allardyce signed roma defender vincent candela deal france international press conference roma player monday anouncing move bolton signed contract bolton candela travel england tuesday june decide continue play bolton retire professional football allardyce hopes candela arrival relieve bolton injury crisis defender nicky hunt limped injured oldham w…	0	1	1	0	1	5	0	5	8	3	6	6	5	14	5	9	10	14	13
Stuart joins Norwich from Addicks Norwich have signed Charlton midfielder Graham Stuart until the end of the season for an undisclosed fee. "It was a very easy decision to make," the 34-year-old told Norwich's website. "The attraction for me was to continue to play in the Premiership." Canaries boss Nigel Worthington added: "I'm delighted that Graham will be joining us until the end of the season…	football	stuart joins norwich addicks norwich signed charlton midfielder graham stuart season undisclosed fee easy decision told norwich website attraction continue play premiership canaries boss nigel worthington delighted graham joining season wealth experience keeping premier league stuart extensive experience everton chelsea charlton play midfield positions joins norwich norfolk club premiership stuar…	0	1	1	0	1	5	0	5	8	3	6	6	5	14	5	9	5	14	13
Celtic make late bid for Bellamy Newcastle striker Craig Bellamy is discussing a possible short-term loan move to Celtic, BBC Sport understands. The Welsh striker has rejected a move to Birmingham after falling out with Magpies manager Graeme Souness. The Toon boss vowed Bellamy would not play again after a bitter row over his exclusion for the game against Arsenal. Celtic are in no position to m…	football	celtic late bid bellamy newcastle striker craig bellamy discussing loan move celtic bbc sport understands welsh striker rejected move birmingham falling magpies manager graeme souness toon boss vowed bellamy play bitter row exclusion game arsenal celtic position match birmingham offer stay season suit bellamy considers future bellamy agent player dismissed permanent move birmingham newcastle play…	0	1	1	0	1	5	0	5	8	3	6	6	5	14	5	9	5	14	13
Campbell lifts lid on United feud Arsenal's Sol Campbell has called the rivalry between Manchester United and the Gunners "bitter and personal". Past encounters have stirred up plenty of ill-feeling between the sides and they meet again at Highbury on Tuesday. "It is just more bitter and personal against United," the defender told The Guardian newspaper. "There's an edge. "After all that has happ…	football	campbell lifts lid united feud arsenal sol campbell called rivalry manchester united gunners bitter personal encounters stirred plenty meet highbury tuesday bitter personal united defender told guardian newspaper edge happened beat sweetest wins lost october arsenal lost trafford record unbeaten league sparked gunners winning games psychological impact defeated referring controversial penalty awa…	0	1	1	0	1	5	0	5	8	3	6	9	8	14	6	6	10	14	12
Rovers reject third Ferguson bid Blackburn have rejected a third bid from Rangers for Scotland captain Barry Ferguson, BBC Sport has learnt. It is thought Blackburn want 拢6m for the midfielder but chief executive John Williams has confirmed the club are still "in dialogue" with Rangers. The 26-year-old has already handed in a transfer request at Ewood Park as he seeks a return to Ibrox. But the c…	football	rovers reject ferguson bid blackburn rejected bid rangers scotland captain barry ferguson bbc sport learnt blackburn midfielder chief executive john williams confirmed club dialogue rangers handed transfer request ewood park seeks return ibrox clubs unable reach agreement fee ferguson moved lancashire thursday rangers increasing offer blackburn midfielder williams rejected proposals rangers deal …	0	1	1	0	1	5	0	5	8	3	6	6	5	14	5	9	10	14	13
SA return to Mauritius Top seeds South Africa return to the scene of one of their most embarrassing failures when they face the Seychelles in the Cosafa Cup next month. Last year Bafana Bafana were humbled in the first by minnows Mauritius who beat them 2-0 in Curepipe. Coach Stuart Baxter and his squad will return to Curepipe face the Seychelles in their first game of the new-look regional compe…	football	sa return mauritius top seeds south africa return scene embarrassing failures seychelles cosafa cup month bafana bafana humbled minnows mauritius beat curepipe coach stuart baxter squad return curepipe seychelles game regional competition format event changed entry seychelles participants teams divided play matches successive days determine champions mauritius host opponents madagascar seychelles…	1	0	3	4	4	1	6	8	11	9	9	12	9	12	10	7	6	8	18
Tottenham bid &#163;8m for Forest duo Nottingham Forest have confirmed they have received an 拢8m bid from Tottenham for Andy Reid and Michael Dawson. Reid rejected a move to Southampton after Forest accepted a cash-plus-players offer while Spurs had made previous bids for the 22-year-old. Spurs had also made an undisclosed offer for 21-year-old defender Dawson. Forest chief executive Mark Arthur …	football	tottenham bid forest duo nottingham forest confirmed received bid tottenham andy reid michael dawson reid rejected move southampton forest accepted offer spurs previous bids spurs undisclosed offer defender dawson forest chief executive mark arthur received bid spurs players offer southampton offer republic ireland international reid comprised players brett ormerod darren kenton spurs previous bi…	0	1	1	0	1	5	0	5	8	3	6	6	5	14	5	9	5	14	13
Redknapp's Saints face Pompey tie New Southampton manager Harry Redknapp faces an immediate reunion with his old club Portsmouth after they were drawn together in the FA Cup fourth round. Exeter City face a home tie against Middlesbrough if they can see off holders Manchester United in a replay. Oldham's reward for beating Manchester City is a home tie with Bolton, while Yeovil will be away to Ch…	football	redknapp saints pompey tie southampton manager harry redknapp reunion club portsmouth drawn fa cup fourth round exeter city tie middlesbrough holders manchester united replay oldham reward beating manchester city tie bolton yeovil charlton chelsea host birmingham tottenham travel west brom arsenal entertain championship wolves saints boss redknapp upbeat draw club walked weeks ago walk portsmouth…	0	1	1	0	1	5	0	5	8	3	6	9	8	14	6	6	10	14	12
Real in talks over Gravesen move Real Madrid are closing in on a 拢2m deal for Everton's Thomas Gravesen after the Dane's agent travelled to Spain to hold talks about a move. John Sivabaek told BBC Sport: "I'm here to listen to what Real have to say. Nothing has been agreed, but this is a big opportunity for any player." The 28-year-old's contract expires in the summer, but Real want a quick deal.…	football	real talks gravesen move real madrid closing deal everton thomas gravesen dane agent travelled spain hold talks move john sivabaek told bbc sport listen real agreed opportunity player contract expires summer real quick deal sivabaek meeting real wednesday everton hands everton decide cash denmark midfield risk losing summer manager david moyes defiantly claimed expects gravesen everton transfer w…	0	1	1	0	1	2	0	0	8	3	5	6	5	14	5	9	5	10	13
Klinsmann issues Lehmann warning Germany coach Jurgen Klinsmann has warned goalkeeper Jens Lehmann he may have to quit Arsenal to keep his World Cup dreams alive. Lehmann is understudy to Oliver Kahn in the German squad, but has lost his place to Manuel Alumnia at Highbury. Klinsmann said: "It will be difficult for any of our players if he is not a first-choice at his club. "If Jens is not Arsena…	football	klinsmann issues lehmann warning germany coach jurgen klinsmann warned goalkeeper jens lehmann quit arsenal cup dreams alive lehmann understudy oliver kahn german squad lost manuel alumnia highbury klinsmann difficult players club jens arsenal keeper playing regularly lehmann desperate germany squad country hosts cup klinsmann playing regularly germany keeper keeper situation jens keeper arsenal …	0	1	1	0	1	5	0	5	8	3	6	9	8	14	6	6	3	14	14
Juninho demand for O'Neill talks Juninho's agent has confirmed that the player is hoping for talks with Martin O'Neill as the Brazilian midfielder comes closer to departing Celtic. Brian Hassell says no official approach has been received from Manchester City but that the English club had been earmarked as a possible destination. But it was being stressed to BBC Sport that Juninho would prefer to…	football	juninho demand talks juninho agent confirmed player hoping talks martin brazilian midfielder closer departing celtic brian hassell official approach received manchester city english club earmarked destination stressed bbc sport juninho prefer remain scottish champions juninho assurances return plans frustrated lack action move middlesbrough summer hassel juninho bought desperately stay celtic see…	0	1	1	0	1	5	0	5	8	3	6	6	5	14	5	9	5	10	13
Wenger signs new deal Arsenal manager Arsene Wenger has signed a new contract to stay at the club until May 2008. Wenger has ended speculation about his future by agreeing a long-term contract that takes him beyond the opening of Arsenal's new stadium in two years. He said: "Signing a new contract just rubber-stamps my desire to take this club forward and fulfil my ambitions. "I still have so muc…	football	wenger signs deal arsenal manager arsene wenger signed contract stay club wenger speculation future agreeing contract takes arsenal stadium signing contract desire club forward fulfil ambitions achieve target drive club exciting times arsenal frenchman told arsenal website intention love club happy wenger won title fa cup times reign chairman peter absolutely delighted arsene signed extension con…	0	1	1	0	1	5	0	5	8	3	6	6	5	14	5	9	3	14	14
FA probes crowd trouble The FA is to take action after trouble marred Wednesday's Carling Cup tie between Chelsea and West Ham. Police in riot gear were confronted by a section of the West Ham support after the match which the Blues won 1-0. Mateja Kezman, the scorer of Chelsea's goal, needed treatment on a head injury during the match after being hit by a missile, believed to be a coin. A spokes…	football	fa probes crowd trouble fa action trouble marred wednesday carling cup tie chelsea west ham police riot gear confronted west ham support match blues won mateja kezman scorer chelsea goal treatment head injury match hit missile believed coin spokeswoman chelsea club await referee report deciding action kezman forced field receive treatment cut eye continue chelsea assistant boss steve clarke talk …	0	1	1	0	1	2	0	0	6	5	6	9	8	6	8	6	14	9	5
Edu describes tunnel fracas Arsenal's Edu has lifted the lid on the scenes that followed Manchester United's win over the Gunners. The Brazilian confirmed tempers had flared but could shed no light on reports that food was thrown at United boss Sir Alex Ferguson. "I saw people being pulled apart, people pushing, pointing and shouting," he told Uefa's official website. "The United players were try…	football	describes tunnel fracas arsenal lifted lid scenes manchester united win gunners brazilian confirmed tempers flared light reports food thrown united boss sir alex ferguson people pulled people pushing shouting told uefa official website united players wind result soup thrown play incidents adding brazilian derbies derby matches brazil worse play games intense rivalry highly critical ferocity unite…	0	1	1	0	1	5	0	5	8	3	6	9	8	14	6	6	10	14	12
Chelsea sack Mutu Chelsea have sacked Adrian Mutu after he failed a drugs test. The 25-year-old tested positive for a banned substance - which he later denied was cocaine - in October. Chelsea have decided to write off a possible transfer fee for Mutu, a 拢15.8m signing from Parma last season, who may face a two-year suspension. A statement from Chelsea explaining the decision read:"We want to mak…	football	chelsea sack mutu chelsea sacked adrian mutu failed drugs test tested positive banned substance denied cocaine october chelsea decided write transfer fee mutu signing parma season suspension statement chelsea explaining decision read chelsea tolerance policy drugs mutu scored goals games arriving stamford bridge form decline frozen coach jose mourinho chelsea statement applies drugs drugs club sp…	0	1	1	0	1	2	0	0	6	5	6	9	3	6	8	6	14	9	5
Ferguson urges Henry punishment Sir Alex Ferguson has called on the Football Association to punish Arsenal's Thierry Henry for an incident involving Gabriel Heinze. Ferguson believes Henry deliberately caught Heinze on the head with his knee during United's controversial win. The United boss said it was worse than Ruud van Nistelrooy's foul on Ashley Cole for which he got a three-game ban. "We sh…	football	ferguson urges henry punishment sir alex ferguson called football association punish arsenal thierry henry incident involving gabriel heinze ferguson believes henry deliberately caught heinze head knee united controversial win united boss worse ruud van nistelrooy foul ashley cole ban fa tackle heinze terrible clubs permitted fa examine specific incidents expected provided hours game clash occurr…	0	1	1	0	1	5	0	5	8	3	6	9	8	14	6	6	10	14	12
Wenger offers Mutu hope Arsenal boss Arsene Wenger would consider signing Adrian Mutu once the striker has served his drugs ban. Mutu was sacked by Chelsea on Friday after testing positive for cocaine - a move Wenger has backed. But he said: "I don't even wonder if that could happen because I think he will be suspended for a long period. "But once he has served his suspension, he has the right ag…	football	wenger offers mutu hope arsenal boss arsene wenger signing adrian mutu striker served drugs ban mutu sacked chelsea friday testing positive cocaine move wenger happen suspended period served suspension start meet player tells mutu ban months football association decides punishment chelsea decided heard sacked striker grounds gross misconduct revealed failed drug test mutu hit club decision chelse…	0	1	1	0	1	5	0	5	6	3	6	9	8	6	8	6	3	9	14
Santini resigns as Spurs manager Tottenham manager Jacques Santini has resigned for "personal reasons". The former France manager moved to White Hart Lane this summer but now wants to return to France. Santini said: "My time at Tottenham has been memorable and it is with deep regret that I take my leave. I wish the club and the supporters all the best. "Private issues in my personal life have ari…	football	santini resigns spurs manager tottenham manager jacques santini resigned personal reasons france manager moved white hart lane summer return france santini time tottenham memorable deep regret leave club supporters private issues personal life arisen caused decision hope wonderful fans respect decision sporting director frank arnesen chairman daniel levy understanding assistant coach martin jol t…	0	1	1	0	1	5	0	5	8	3	6	6	5	14	5	9	5	10	13
Mutu to hold talks with Juventus Disgraced former Chelsea striker Adrian Mutu is to begin talks with Juventus as he looks for a new club. "Mutu will be in our club's main stand to watch the match between Juventus and Fiorentina," said a Juventus official, who declined to be named. "Then he will meet some important people of the club," he added. Mutu, 25, sacked by Chelsea and banned for seven mon…	football	mutu hold talks juventus disgraced chelsea striker adrian mutu talks juventus club mutu club main stand watch match juventus fiorentina juventus official declined named meet people club mutu sacked chelsea banned months cocaine represented alessandro moggi son juve manager luciano moggi mutu banned english fa resume playing undergo drug education rehabilitation programme mutu train romanian dinam…	0	1	1	0	1	2	0	0	6	5	6	6	3	6	8	9	14	9	5
Uefa approves fake grass Uefa says it will allow European matches to be played on artificial pitches from the start of next season. European football's governing body made the decision at a meeting of its Executive Committee on Wednesday. Uefa explained that the move "follows comprehensive studies into the sporting and medical aspects of using artificial playing surfaces." They can be used subjec…	football	uefa approves fake grass uefa european matches played artificial pitches start season european football governing body decision meeting executive committee wednesday uefa explained move comprehensive studies sporting medical aspects artificial playing surfaces subject complying uefa quality criteria obligatory luton preston queens park rangers clubs plastic pitches study uefa insists surfaces mov…	0	1	1	0	1	2	0	5	8	3	6	6	5	14	5	9	5	7	13
Yeading face Newcastle in FA Cup Premiership side Newcastle United face a trip to Ryman Premier League leaders Yeading in the FA Cup third round. The game - arguably the highlight of the draw - is a potential money-spinner for non-League Yeading, who beat Slough in the second round. Conference side Exeter City, who knocked out Doncaster on Saturday, will travel to Old Trafford to meet holders Man…	football	yeading newcastle fa cup premiership newcastle united trip ryman premier league leaders yeading fa cup round game arguably highlight draw potential yeading beat slough round conference exeter city knocked doncaster saturday travel trafford meet holders manchester united january arsenal drawn stoke chelsea play host scunthorpe draw hinckley united held brentford goalless draw sunday meet league le…	0	1	1	0	1	5	0	5	8	3	6	9	8	14	6	6	10	14	12
Anelka 'eyes Man City departure' Striker Nicolas Anelka reportedly wants to leave Manchester City in search of Champions League football. Anelka, 25, is in talks over a contract extension beyond 2007 with City but is believed to fear his career will go stale if he stays at the club. The News of the World reports that Anelka told a French magazine: "I either decide to win titles or to have an easy…	football	anelka city departure striker nicolas anelka reportedly leave manchester city search champions league football anelka talks contract extension city believed fear career stale stays club news reports anelka told french magazine decide win titles easy life choose football club offer win titles players capability stagnate eighth impossible progress score goals win risk create feeling fed anelka earn…	0	1	1	0	1	2	0	5	8	3	6	6	5	14	5	9	5	10	13
Arnesen denies rift with Santini Tottenham sporting director Frank Arnesen has denied that coach Jacques Santini resigned because of a clash of personalities at White Hart Lane. There had been newspaper speculation that Santini had felt undermined by Arnesen's role at the club. "It is absolutely not true," Arnesen told BBC Radio Five Live. "There is only one thing that made him resign and that is…	football	arnesen denies rift santini tottenham sporting director frank arnesen denied coach jacques santini resigned clash personalities white hart lane newspaper speculation santini undermined arnesen role club absolutely true arnesen told bbc radio live resign personal talked matter absolutely arnesen unable throw light caused santini quit games charge jacques trust accept respect plan weekend talks boa…	0	1	1	0	1	5	0	5	8	3	6	6	5	14	5	9	5	10	13
Souness backs Smith for Scotland Graeme Souness believes Walter Smith would be the perfect choice to succeed Berti Vogts as Scotland manager. Souness's former assistant at Rangers is hot favourite to take over from Vogts, who resigned on Monday. "Walter is most definitely the ideal candidate for that job. He'd be perfect for it," Souness told BBC Sport. The Scottish Football Association has appoi…	football	souness smith scotland graeme souness believes walter smith perfect choice succeed berti vogts scotland manager souness assistant rangers hot favourite vogts resigned monday walter ideal candidate job perfect souness told bbc sport scottish football association appointed tommy burns provisional friendly sweden november fits bill knowledge understanding scotland team football experienced successfu…	0	1	1	0	1	5	0	5	8	3	6	6	5	14	5	9	5	14	13
Gallas sees two-horse race Chelsea's William Gallas believes they will battle it out with Arsenal for the Premiership in the coming months. "It'll be a two-horse race all the way to the end of the season because we are both going to give it everything," he told BBC Sport. "You need to be good and you need a lot of luck. You need a bit of both but it will be as hard for the Arsenal players as it i…	football	gallas race chelsea william gallas believes battle arsenal premiership coming months race season told bbc sport lot luck bit hard arsenal players chelsea boys power hands gallas happen football seasons ago manchester united picked season won title chelsea football challenging arsenal player challenging gallas extra confidence impact manager jose mourinho manager summer french international defend…	0	1	1	0	1	2	0	0	6	5	6	9	8	6	8	6	14	9	5
Tevez - an Argentine in Brazil Some 65 years ago Bernardo Gandulla left Boca Juniors in his native Argentina and headed for Brazil. He arrived at the Vasco da Gama club with considerable prestige - which he failed to live up to. He left an impression, but not for reasons he would have wanted. The only thing of note he did was to throw the ball back when it went out of play. Even today, 'gandula' …	football	tevez argentine brazil ago bernardo gandulla left boca juniors native argentina headed brazil arrived vasco da gama club considerable prestige failed live left impression reasons note throw ball play term brazil ballboy brazilians delighted failure gandulla delight history repeated boca juniors player coming brazil maradona carlos tevez joining corinthians strong candidate strangest move corinthi…	0	1	1	0	1	5	0	5	8	3	6	6	5	14	5	9	5	10	13
Edu blasts Arsenal Arsenal's Brazilian midfielder Edu has hit out at the club for stalling over offering him a new contract. Edu's deal expires next summer and he has been linked with Spanish trio Real Madrid, Barcelona and Valencia. He told BBC Sport: "I'm not sure if I want to stay or not because the club have let the situation go on this far. "If they had really wanted to sign they should have…	football	blasts arsenal arsenal brazilian midfielder hit club stalling offering contract deal expires summer linked spanish trio real madrid barcelona valencia told bbc sport stay club situation sign offer months indicating sign brother representative amadeo fensao arsenal current offer midfielder short seeking brother london thursday meeting planned january sort arsenal choice stay sort club decision mee…	0	1	1	0	1	5	0	5	8	3	6	6	5	14	5	9	5	10	13
Can Smith work Scottish wonders? The worst kept secret in Scottish football was revealed on Thursday when Walter Smith was named as the new national manager. From the moment Berti Vogts' miserable tenure in charge of Scotland ended, the former Rangers and Everton boss has been the overwhelming favourite for the post. But is Smith the man for what must be one of the hardest jobs in football? The 5…	football	smith scottish wonders worst secret scottish football revealed thursday walter smith named national manager moment berti vogts miserable tenure charge scotland rangers everton boss overwhelming favourite post smith hardest jobs football takes time national doldrums scotland reached major finals cup reaching germany impossible picked games qualifying race fifa rankings scotland listed time low lik…	0	1	1	0	1	5	0	5	8	3	6	6	5	14	5	9	10	14	13
Jansen suffers a further setback Blackburn striker Matt Jansen faces three weeks out after surgery to treat a cartilage problem. But central defender Lorenzo Amoruso is moving closer to fitness following a knee operation. Rovers' assistant manager Mark Bowen said: "Matt had a small operation to trim knee cartilage. "It's a tiny piece of work, which should be a fairly quick recovery. Lorenzo is al…	football	jansen suffers setback blackburn striker matt jansen weeks surgery treat cartilage central defender lorenzo amoruso moving closer fitness knee operation rovers assistant manager mark bowen matt operation trim knee cartilage tiny piece fairly quick recovery lorenzo jogging time kicking ball jansen career dogged injury freak scooter accident ago returned action mark hughes appointment blackburn bos…	0	1	1	0	1	5	0	5	8	3	6	6	5	14	5	9	5	14	13
Mansfield 0-1 Leyton Orient An second-half goal from Andy Scott condemned Mansfield to a ninth successive game without a win. Early in the second half Wayne Carlisle's cross was met by Scott and he blasted the ball home from just outside the penalty area. As Orient chased a second, Mansfield had to clear Alan White's header off the line and Kevin Pilkington saved well from Michael Simpson. By the…	football	mansfield leyton orient goal andy scott condemned mansfield ninth successive game win half wayne carlisle cross met scott blasted ball penalty orient chased mansfield alan white header kevin pilkington saved michael simpson mansfield fans chanting head chairman keith haslam pilkington talbot buxton dimech artell corden murray curtis neil warne barker subs white mcintosh wood lloyd herron harrison…	0	0	0	2	0	5	4	5	8	3	8	11	11	13	11	3	16	12	19
Zambia confident and cautious Zambia's technical director, Kalusha Bwalya is confident and cautious ahead of the Cosafa Cup final against Angola on Saturday in Lusaka. Bwalya said: "Nothing short of victory will do." However Bwalya warned his side not to be too complacent. "I don't want my team to be too comfortable or too sure of victory as it is going to be a difficult game. "For me the main ai…	football	zambia confident cautious zambia technical director kalusha bwalya confident cautious ahead cosafa cup final angola saturday lusaka bwalya short victory bwalya warned complacent team comfortable victory difficult game main aim game enjoy win zambia determination win final recalling players bwalya player competition played scored mauritius uncertain field chipolopolo fans cautious concert schedule…	0	0	2	2	5	0	5	1	0	1	1	6	10	7	14	10	15	5	9
Reaction from Spanish press England's 1-0 defeat to Spain on Wednesday dominated the back and front pages of the country's press on Thursday. Controversy was in no short supply, with racist abuse of England's black players, Wayne Rooney's petulance and England's inept performance. But what did the Spanish press make of the affair? BBC Sport looks at the reaction. There is little coverage of the r…	football	reaction spanish press england defeat spain wednesday dominated front country press thursday controversy short supply racist abuse england black players wayne rooney petulance england inept performance spanish press affair bbc sport reaction coverage racist chanting wednesday night game cover english reaction comments spain coach luis aragones highlighted britain colonial probed remarks thierry h…	0	1	1	0	1	5	0	5	8	3	6	6	5	14	5	9	5	10	13
Kerr frustrated at victory margin Republic of Ireland manager Brian Kerr admitted he was frustrated his side did not score more than one goal in their friendly win over Croatia. Robbie Keane took his Republic record to 24 with a first-half goal which proved enough for victory. "We had more good chances. It is just a shame we did not take them against such a technically gifted team," said Kerr. "B…	football	kerr frustrated victory margin republic ireland manager brian kerr admitted frustrated score goal friendly win croatia robbie keane republic record goal proved victory chances shame technically gifted team kerr conditions standard croatian team happy win republic clean sheet eighth time matches unbeaten games kerr succeeded mick mccarthy kerr applauded decisive move earned victory brilliant goal …	0	1	1	0	1	5	0	5	8	3	6	9	8	14	6	3	7	12	15
Mourinho plots impressive course Chelsea's win at Fulham - confirming their position at the Premiership summit - proves that they now have everything in place to mount serious challenges on all fronts this season. They have got strength in depth, great players, an outstanding manager in Jose Mourinho and finances no other club in the world can match. All they need to add now is the big prizes whi…	football	mourinho plots impressive chelsea win fulham confirming position premiership summit proves mount challenges fronts season strength depth players outstanding manager jose mourinho finances club match add prizes difficult position leap success impressively beat tough everton stamford bridge won newcastle carling cup won fulham result form winning major honours hardest task mourinho manager lot easi…	0	1	1	0	1	2	0	0	6	5	6	9	8	6	8	6	14	9	5
Hearts of Oak 3-2 Cotonsport Hearts of Oak set up an all Ghanaian Confederation Cup final with a 3-2 win over Cameroon's Cotonsport Garoua in Accra on Sunday. The win for Hearts means they will play Asante Kotoko in the two-leg final, after the Kumasi team qualified from Group A on Saturday. In the other Group B game Cameroon's beat of South Africa 3-2 in Douala, neither side could have qualified…	football	hearts oak cotonsport hearts oak set ghanaian confederation cup final win cameroon cotonsport garoua accra sunday win hearts play asante kotoko final kumasi team qualified saturday game cameroon beat south africa douala qualified final hearts oak started game win qualify final cotonsport avoid defeat louis agyemang scored goals hearts half time ben don bortey scored hearts looked set comfortable …	0	0	2	0	5	0	5	1	7	1	1	9	8	7	6	3	7	12	15
Curbishley delight for Johansson Charlton manager Alan Curbishley paid tribute to two-goal striker Jonatan Johansson after beating Norwich. Curbishley said after the 4-0 win: "There was talk about Norwich being interested in the summer but I have a lot of faith in Jonatan. "When there was talk of other clubs I just told him he was going nowhere. "He's part of our squad and he got us a couple of i…	football	curbishley delight johansson charlton manager alan curbishley paid tribute striker jonatan johansson beating norwich curbishley win talk norwich summer lot faith jonatan talk clubs told squad couple goals happy delighted players curbishley subjected criticism charlton fans club pulling direction happened people	0	1	1	0	1	5	0	5	8	3	6	6	5	14	5	9	5	17	13
Lennon brands Rangers favourites Celtic's Neil Lennon admits Rangers could be considered "slight favourites" for the Old Firm CIS Cup clash, but insists his side can still win. Lennon concedes Rangers are in good form at the moment, but they have failed to beat Celtic in their last seven meetings. "Rangers are on the up and have been on a good run in recent weeks," he said. "But it's a game we be…	football	lennon brands rangers favourites celtic neil lennon admits rangers considered slight favourites firm cis cup clash insists win lennon concedes rangers form moment failed beat celtic meetings rangers weeks game capable winning play told evening times boys forward brilliant games involved playing top game winning matches minute top league chance staying europe crisis people concern losing goals not…	0	1	1	0	1	5	0	5	8	3	6	6	5	14	5	9	5	14	13
McClaren hails Boro's Uefa spirit Middlesbrough boss Steve McClaren has praised the way his side have got to grips with European football after the 2-0 Uefa Cup win against Lazio. Boro, who are playing in Europe for the first time in their 128-year history, are top of Group E with maximum points. "I think we have taken to Europe really well," said McClaren. "We got about Lazio, didn't let them se…	football	mcclaren hails boro uefa spirit middlesbrough boss steve mcclaren praised grips european football uefa cup win lazio boro playing europe time history top maximum europe mcclaren lazio settle play possession controlled looked threatening time forward match mcclaren win italian giants boro firmly european footballing map perfect european night team fans performance icing cake performances special e…	0	1	1	0	1	5	0	5	8	3	6	6	5	14	6	9	4	14	3
Benitez delight after crucial win Liverpool manager Rafael Benitez admitted victory against Deportivo La Coruna was vital in their tight Champions League group. Jorge Andrade's early own goal gave Liverpool a 1-0 win. And Benitez said: "We started at a very high tempo and had many chances. It is a very important win for us and we could have scored more goals. "We were very good defensively and al…	football	benitez delight crucial win liverpool manager rafael benitez admitted victory deportivo la coruna vital tight champions league jorge andrade goal liverpool win benitez started tempo chances win scored goals defensively counter attack pleased move game igor biscan outstanding midfield replacing injured xabi alonso benitez played players ready squad play games level benitez hands win delighted feel…	0	1	1	0	1	2	0	0	5	5	5	10	7	5	15	0	8	16	6
Bristol City 2-1 Milton Keynes Leroy Lita took his goal tally to 13 for the season as his double earned City an LDV Vans Trophy win. The striker finished off Scott Murray cross from close range just seconds before half-time. Lita then made it 2-0 on 52 minutes, but Dons' substitute Serge Makofo then netted a great volley to make it 2-1. The visitors almost took the tie to extra time with a late 3…	football	bristol city milton keynes leroy lita goal tally season double earned city ldv vans trophy win striker finished scott murray cross close range lita minutes dons substitute serge makofo netted volley visitors tie extra time late bullet richard johnson held steve phillips phillips amankwaah coles hill fortune murray anyinsah doherty harley dinning bell lita cotterill gillespie subs orr brown hill l…	0	1	1	0	2	5	0	5	3	3	6	7	8	1	1	3	10	14	3
Hereford 1-1 Doncaster Hereford win 3-1 on penalties. Rovers took the lead on 59 minutes as Michael McIndoe's corner found Adriano Rigoglioso, whose stunning volley soared into the top right of the net. Danny Williams equalised for the hosts after 72 minutes with a crisp finish from just insist the penalty box. McIndoe saw an extra-time penalty saved, giving Mills the chance to net the winning pe…	football	hereford doncaster hereford win penalties rovers lead minutes michael mcindoe corner adriano rigoglioso stunning volley soared top net danny williams equalised hosts minutes crisp finish insist penalty box mcindoe penalty saved mills chance net winning penalty mawson travis mkandawire james robinson daniel williams stanley hyde pitman purdie mills brown stansfield green subs smith scott james dan…	0	0	0	2	0	4	4	7	0	7	8	11	11	8	13	3	7	12	15
Wolves appoint Hoddle as manager Glenn Hoddle will be unveiled as the new Wolves manager on Tuesday. The club have confirmed that the former England coach will be unveiled as the successor to Dave Jones at a news conference at Molineux at 1100 GMT. Hoddle has been linked with a return to former club Southampton but Wolves have won the race for his services. He has been out of the game since being…	football	wolves appoint hoddle manager glenn hoddle unveiled wolves manager tuesday club confirmed england coach unveiled successor dave jones news conference molineux gmt hoddle linked return club southampton wolves won race services game sacked spurs september alongside wolves caretaker boss stuart gray southampton hoddle managerial career swindon moving chelsea england job spell charge national cup con…	0	1	1	0	1	5	0	5	8	3	6	6	5	14	5	9	5	14	13
Wenger keeping faith with Almunia Arsene Wenger has pledged to keep faith with stand-in keeper Manuel Almunia for the crunch week which could define Arsenal's season. Almunia will start Tuesday's Champions League group tie against Rosenborg and is likely to face Chelsea on Sunday. Wenger said: "You don't think I would take out one goalkeeper for just one game, do you? I don't do that. "I have to …	football	wenger keeping faith almunia arsene wenger pledged faith keeper manuel almunia crunch week define arsenal season almunia start tuesday champions league tie rosenborg chelsea sunday wenger goalkeeper game games story bigger wenger insists complete faith spaniard signed summer celta vigo jens lehmann career left players time dennis bergkamp kanu goalkeeper usual situation team matter mistake traffo…	0	1	1	0	1	5	0	5	8	3	6	9	8	14	6	6	3	14	14
Houllier praises Benitez regime Former Liverpool manager Gerard Houllier has praised the work of his Anfield successor Rafael Benitez. Houllier was angry at reports that he has been critical of Benitez since the Spaniard took over at Liverpool. But Houllier told BBC Sport: "In private and in public, I have stressed I believe Rafa is doing a good job. He is the right man at the right place. "Rafa …	football	houllier praises benitez regime liverpool manager gerard houllier praised anfield successor rafael benitez houllier angry reports critical benitez spaniard liverpool houllier told bbc sport private public stressed rafa job rafa coach spoken liverpool criticised houllier revealed ready return game leaving liverpool anfield france boss linked host jobs pulled race succeed mark hughes wales national…	0	1	1	0	1	2	0	0	5	5	5	10	7	5	15	0	8	16	6
McClaren targets Champions League Middlesbrough boss Steve McClaren believes his side can clinch a top-four spot in the Premiership and secure qualification for the Champions League. After their 3-2 win over Manchester City, McClaren said: "We are playing exciting football, it's a magnificent result to keep us in the top five. "But how well we do depends how often we can get our best team out. "O…	football	mcclaren targets champions league middlesbrough boss steve mcclaren believes clinch spot premiership secure qualification champions league win manchester city mcclaren playing exciting football magnificent result top depends team goal paid mcclaren praised winger stewart strikers jimmy floyd hasselbaink mark viduka barren runs front goal stewart playing eriksson pick strikers scored goals combina…	0	1	1	0	1	5	0	5	8	3	6	9	8	14	6	6	10	14	12
Hitzlsperger waiting on O'Leary Aston Villa's Thomas Hitzlsperger is waiting to learn the future of manager David O'Leary before committing himself to a new contract with the club. O'Leary has been in talks over a new deal and he said: "I had a message from Thomas' agent asking me what the news was on myself. "He wants to find out before he goes into discussions over Thomas. "The reason Thomas is…	football	hitzlsperger waiting aston villa thomas hitzlsperger waiting learn future manager david committing contract club talks deal message thomas agent news discussions thomas reason thomas speaking club agent outcome hitzlsperger current deal expires summer offered deal midlands club german international understood keen remain villa native country hamburg assurances committing negotiations contract sta…	0	1	1	0	1	5	0	5	8	3	6	6	5	14	5	9	5	10	13
Mourinho to escape FA charge Chelsea boss Jose Mourinho will not face any Football Association action over the comments he made after their Carling Cup tie with Manchester United. Mourinho intimated that United boss Sir Alex Ferguson influenced referee Neale Barry after the duo walked down the tunnel together at half-time. But an FA spokesman told BBC Sport: "We are not taking action over Mourinh…	football	mourinho escape fa charge chelsea boss jose mourinho football association action comments carling cup tie manchester united mourinho intimated united boss sir alex ferguson influenced referee neale barry duo walked tunnel fa spokesman told bbc sport action mourinho looked comments decided action required mourinho concerned ferguson conversation barry inconsistent display official referee half mou…	0	1	1	0	1	5	0	5	6	5	6	9	8	6	8	6	14	9	5
Wolves appoint Hoddle as manager Glenn Hoddle has been unveiled as the new Wolves manager. The ex-England coach has been given a six-month contract to succeed Dave Jones, who was sacked after the club's poor start to the season. Wolves chairman Rick Hayward said: "We're delighted Glenn is here. He has a six-month contract so we can test each other out and see if it works." Hoddle, who will work a…	football	wolves appoint hoddle manager glenn hoddle unveiled wolves manager coach contract succeed dave jones sacked club poor start season wolves chairman rick hayward delighted glenn contract test hoddle alongside stuart gray game sacked spurs gray caretaker manager assistant boss hoddle manager southampton delighted hoddle massive potential wolves desire amibition premiership parallels ambitions stuart…	0	1	1	0	1	5	0	5	8	3	6	6	5	14	5	9	5	14	13
Redknapp poised for Saints Southampton are set to unveil Harry Redknapp as their new manager at a news conference at 1500 GMT on Wednesday. The former Portsmouth boss replaces Steve Wigley, who has been relieved of first-team duties after just one win in 14 league games in charge. Redknapp, 57, quit his Fratton Park position on 24 November and vowed: "I will not go down the road - no chance." Pom…	football	redknapp poised saints southampton set unveil harry redknapp manager news conference gmt wednesday portsmouth boss replaces steve wigley relieved duties win league games charge redknapp quit fratton park position november vowed road chance pompey coach kevin bond poised join redknapp saints boss season redknapp game charge middlesbrough saturday portsmouth chairman milan mandaric disappointed new…	0	1	1	0	1	5	0	5	8	3	6	6	5	14	5	9	10	14	13
FA charges Liverpool and Millwall Liverpool and Millwall have been charged by the Football Association over crowd trouble during their Carling Cup match on 26 October. Millwall, who lost the match 3-0, have also been charged over alleged racist behaviour by their supporters. During the match at Millwall's new Den Stadium, seats were ripped up and four people were ejected from the ground. A disabl…	football	fa charges liverpool millwall liverpool millwall charged football association crowd trouble carling cup match october millwall lost match charged alleged racist behaviour supporters match millwall den stadium seats ripped people ejected ground disabled fan injured perimeter pitch riot police control situation liverpool fans claimed trouble sparked chants hillsborough disaster supporters crushed d…	0	1	1	0	1	2	0	0	5	5	5	10	7	5	15	0	8	16	6
Wenger steps up row Arsene Wenger has stepped up his feud with Sir Alex Ferguson by claiming the Manchester United manager is guilty of bringing football into disrepute. The pair's long-running row was put back in the headlines on Saturday when Ferguson said his Arsenal counterpart was "a disgrace". Wenger initially refused to bite back, saying only: "I will never answer any questions any more ab…	football	wenger steps row arsene wenger stepped feud sir alex ferguson claiming manchester united manager guilty bringing football disrepute pair row headlines saturday ferguson arsenal counterpart disgrace wenger initially refused bite answer questions claims ferguson punished football association twist saga saturday united boss interview independent newspaper discussed events game october united won day…	0	1	1	0	1	5	0	5	8	3	6	9	8	14	6	6	3	14	14
Liverpool revel in night of glory Liverpool manager Rafael Benitez said their qualification for the next stage of the Champions League was "one of the proudest nights of my career." The Reds beat Olympiakos 3-1 with a late Steven Gerrard strike and Benitez said: "It was a really great night. "The players ran hard all the time and you see how much it means to the fans. "We knew before the game tha…	football	liverpool revel night glory liverpool manager rafael benitez qualification stage champions league proudest nights career reds beat olympiakos late steven gerrard strike benitez night players hard time fans game club gain extra finances liverpool result benitez hailed gerrard strike minutes time anfield crowd sticking fallen goal interval reds scored goals sensational comeback capped gerrard drive…	0	1	1	0	1	2	0	0	5	5	5	10	7	5	15	0	8	16	6
English clubs make Euro history All four of England's Champions League representatives have reached the knockout stages for the first time. Arsenal and Chelsea are seeded as group winners, while runners-up Manchester United and Liverpool are not. Rules stipulate that teams from the same country or group will be kept apart in the draw on 17 December. The favourites are Chelsea and Barcelona, and R…	football	english clubs euro history england champions league representatives reached knockout stages time arsenal chelsea seeded winners manchester united liverpool rules stipulate teams country draw december favourites chelsea barcelona real madrid milan juventus bayern munich hat steven gerrard secured qualification olympiakos wednesday evening ac milan bayer leverkusen internazionale juventus lyon qual…	0	1	1	0	1	2	0	0	6	5	6	9	8	6	8	6	14	10	5
Ferguson puts faith in youngsters Manchester United manager Sir Alex Ferguson said he has no regrets after his second-string side lost 3-0 away at Fenerbahce in the Champions League. Ferguson said: "The good thing about being manager is that you are in control of which team to pick. "I care about United, that's important, so while I am disappointed at the result I am not at the team I selected. "…	football	ferguson faith youngsters manchester united manager sir alex ferguson regrets lost fenerbahce champions league ferguson manager control team pick care united disappointed result team selected game lads remember time ferguson admitted turks result meant finished lyon play lack strength complaints scoreline half moments attack situation chance game petered difference won finished inter ac milan juv…	0	1	1	0	1	5	0	5	8	3	6	9	8	14	6	6	10	14	12
Beckham relief as Real go through David Beckham expressed his relief at Real Madrid's passage to the Champions League knockout phase. After Real's 3-0 win at Roma, the England skipper admitted another season of under-achievement would not be tolerated at the Bernabeu stadium. Beckham said: "It's expected of Madrid to get through, but it's a relief for the club and players to have won. "We lost mo…	football	beckham relief real david beckham expressed relief real madrid passage champions league knockout phase real win roma england skipper admitted season tolerated bernabeu stadium beckham expected madrid relief club players won lost momentum season afford season winning real finish champions league club manchester united round real drawn premiership hopefuls arsenal chelsea won respective play englis…	0	1	1	0	1	2	0	0	8	3	6	6	5	14	5	9	5	10	13
Man Utd through after Exeter test Manchester United avoided an FA Cup upset by edging past Exeter City in their third round replay. Cristiano Ronaldo scored the opener, slipping the ball between Paul Jones' legs after just nine minutes. United wasted a host of chances to make it safe as Jones made some great saves, but Wayne Rooney put the tie beyond doubt late on with a cool finish. Exeter had c…	football	utd exeter test manchester united avoided fa cup upset edging exeter city round replay cristiano ronaldo scored opener slipping ball paul jones legs minutes united wasted host chances safe jones saves wayne rooney tie doubt late cool finish exeter chances sean devine volleying wide andrew taylor forcing tim howard save united boss sir alex ferguson chances draw game handed starts paul scholes rya…	0	1	1	0	1	5	0	5	8	3	6	9	8	14	6	6	10	14	12
Hamm bows out for US Women's football legend Mia Hamm has played her final game. Hamm, 32, who officially retired after this year's Athens Olympics, took to the field for the last time to help the US claim a 5-0 win over Mexico. Hamm ends her career as the most prolific scorer - male or female - in international football, with 158 goals in 276 games for the US. She was twice Fifa women's player o…	football	hamm bows women football legend mia hamm played final game hamm officially retired athens olympics field time claim win mexico hamm career prolific scorer male female international football goals games fifa women player won cup olympic golds retirement hamm mixed emotions life focus time energy commit friendly julie foudy joy fawcett careers hamm embark life husband chicago cubs shortstop nomar g…	0	2	2	3	2	3	0	5	8	4	2	6	5	14	5	9	4	4	13
Wenger rules out new keeper Arsenal boss Arsene Wenger says he has no plans to sign a new goalkeeper during the January transfer window. Wenger has brought in Manuel Almunia for the last three games for the out-of-form Jens Lehmann - but the Spaniard himself has been prone to mistakes. There have been suggestions that Wenger will swoop for a high-quality shot-stopper in the New Year. But he told …	football	wenger rules keeper arsenal boss arsene wenger plans sign goalkeeper january transfer window wenger brought manuel almunia games jens lehmann spaniard prone mistakes suggestions wenger swoop told evening standard feel bring goalkeeper january gunners manager refused comment difficult start almunia career highbury drawn lehmann return table clash chelsea sunday almunia fault rosenborg goal arsenal…	0	1	1	0	1	5	0	5	8	3	6	9	8	14	6	6	3	14	14
Liverpool pledge to keep Gerrard Liverpool chief executive Rick Parry insists the club will never sell Steven Gerrard amid reports Chelsea will renew their bid to lure him from Anfield. Gerrard reiterated his desire to win trophies with the Reds after his superb Champions League winner on Wednesday. And Parry has moved to scotch claims that Chelsea could launch a 拢35m bid. "There is no chance of …	football	liverpool pledge gerrard liverpool chief executive rick parry insists club sell steven gerrard amid reports chelsea renew bid lure anfield gerrard reiterated desire win trophies reds superb champions league winner wednesday parry moved scotch claims chelsea launch bid chance stevie january parry wo happen intention gerrard scored spectacular late goal liverpool win olympiakos book knockout stages…	0	1	1	0	1	2	0	0	5	5	5	10	7	5	15	0	8	16	6
Pearce keen on succeeding Keegan Joint assistant boss Stuart Pearce has admitted he would like to succeed Kevin Keegan as manager at Manchester City. Keegan has decided to step down as City manager when his contract comes to an end in 18 months. "You don't have to be Einstein to realise there will be a manager's job available at a really good club," Pearce told BBC GMR. "I will certainly be apply…	football	pearce keen succeeding keegan joint assistant boss stuart pearce admitted succeed kevin keegan manager manchester city keegan decided step city manager contract months einstein realise manager job club pearce told bbc gmr applying board deem pearce initially joined city player keegan coaching staff promoted joint departure arthur cox summer england defender nottingham forest seasons ago secret de…	0	1	1	0	1	5	0	5	8	3	6	6	5	14	5	9	5	14	13
Bomb threat at Bernabeu stadium Spectators were evacuated from Real Madrid's Bernabeu stadium on Sunday following a bomb scare during the game between the hosts and Real Sociedad. More than 70,000 people abandoned the ground with the score at 1-1 and only three minutes left to play. The Basque newspaper Gara apparently received a telephone call saying a bomb was due to explode at 2100 local time.…	football	bomb threat bernabeu stadium spectators evacuated real madrid bernabeu stadium sunday bomb scare game hosts real sociedad people abandoned ground score minutes left play basque newspaper gara received telephone call bomb explode local time searching stadium sniffer dogs police explosive device police completed search real madrid president florentino perez nightmare madrid midfielder guti told pri…	0	1	1	0	1	2	0	0	5	3	5	6	5	14	5	9	5	10	13
Chelsea hold Arsenal A gripping game between Arsenal and Chelsea ended with the honours finishing even at Highbury. Thierry Henry produced a sublime strike to put Arsenal ahead but John Terry levelled with a powerful header. Henry's quickly-taken free-kick put Arsenal back in front but Eidur Gudjohnsen equalised with a header from William Gallas' knockback. Henry missed a golden chance when he bl…	football	chelsea hold arsenal gripping game arsenal chelsea honours finishing highbury thierry henry produced sublime strike arsenal ahead john terry levelled powerful header henry arsenal front eidur gudjohnsen equalised header william gallas knockback henry missed golden chance blazed shot late arsenal penalty appeal rejected henry opener arsenal perfect start set enthralling affair french striker heade…	0	1	1	0	1	5	0	5	6	3	6	9	8	6	8	6	3	9	14
Real will finish abandoned match Real Madrid and Real Socieded will play the final six minutes of their match, which was abandoned on Sunday because of a bomb scare. The Bernabeu was evacuated with the score at 1-1 and two minutes of normal time remaining in the game. The teams will now play the final two minutes, plus four minutes of injury time, on 5 January. Brazilian Ronaldo and England capta…	football	real finish abandoned match real madrid real socieded play final minutes match abandoned sunday bomb scare bernabeu evacuated score minutes normal time remaining game teams play final minutes minutes injury time january brazilian ronaldo england captain david beckham wait street kit abandonment real sociedad president jose luis astiazaran play time remaining hundreds fans streamed pitch exits gam…	0	1	1	0	1	2	0	5	8	3	6	6	5	14	5	9	5	10	13
Poll explains free-kick decision Referee Graham Poll said he applied the laws of the game in allowing Arsenal striker Thierry Henry's free-kick in Sunday's 2-2 draw with Chelsea. Keeper Petr Cech was organising his defensive wall when Henry's quick free-kick flew in, which angered Chelsea. "The whistle doesn't need to be blown. I asked Henry 'do you want a wall?'. He said 'can I take it please?' …	football	poll explains decision referee graham poll applied laws game allowing arsenal striker thierry henry sunday draw chelsea keeper petr cech organising defensive wall henry quick flew angered chelsea whistle blown henry wall polite poll deal laws game deal poll signal happened refereed chelsea west ham fa cup replay ago jimmy floyd hasselbaink scored remember complaining henry explained paused striki…	0	1	1	0	1	5	0	5	8	3	6	9	8	6	8	6	3	9	14
Solskjaer raises hopes of return Manchester United striker Ole Gunnar Solskjaer said he hoped to return next season following a career-threatening injury to his right knee. The 31-year-old Norway international had surgery in Sweden in August to transplant cartilage into the joint. "I'm in no doubt that I'll play again," Solskjaer told Aftenposten Daily. "The problem will be the speed but we're ta…	football	solskjaer raises hopes return manchester united striker ole gunnar solskjaer hoped return season injury knee norway international surgery sweden august transplant cartilage joint doubt play solskjaer told aftenposten daily speed talking months time knee slavishly programme solskjaer played united late substitute fa cup final win millwall contract united runs time premier league club	0	1	1	0	1	5	0	5	8	3	6	6	5	14	6	6	10	14	12
Dunne keen to commit to Man City Richard Dunne is ready to commit his long-term future to Manchester City after turning his career around. He was once threatened with the sack by City boss Kevin Keegan but has since responded with impressive performances, prompting interest from other clubs. Early talks have taken place and the defender said: "Hopefully something will be sorted out as soon as pos…	football	dunne keen commit city richard dunne ready commit future manchester city career threatened sack city boss kevin keegan responded impressive performances prompting clubs talks defender sorted stay city improved player newcastle boss graeme souness impressed dunne turnaround form ready bid stopper january transfer window dubliner underlined intention stay eastlands nice linked top clubs enjoy city …	0	1	1	0	1	5	0	5	8	3	6	6	5	14	5	9	5	14	13
Bates seals takeover Ken Bates has completed his takeover of Leeds United. The 73-year-old former Chelsea chairman sealed the deal at 0227 GMT on Friday, and has bought a 50% stake in the club. He said: "I'm delighted to be stepping up to the mantel at such a fantastic club. I recognise Leeds as a great club that has fallen on hard times. "We have a lot of hard work ahead to get the club back whe…	football	bates seals takeover ken bates completed takeover leeds united chelsea chairman sealed deal gmt friday bought stake club delighted stepping mantel fantastic club recognise leeds club fallen hard times lot hard ahead club belongs premiership fans bates bought stake guise company forward sports fund revealed plan buy leeds elland road stadium thorp arch training ground tough jon task stabilise cash…	0	1	1	0	1	5	0	5	8	3	6	6	5	14	5	9	5	14	13
Ferguson rues failure to cut gap Boss Sir Alex Ferguson was left ruing Manchester United's failure to close the gap on Chelsea, Everton and Arsenal after his side's 1-1 draw with Fulham. Premiership leaders Chelsea and the Gunners endured a 2-2 stalemate on Sunday, giving United the chance to make up some ground in the league. But Ferguson said: "I think what makes it so bad is that both our riva…	football	ferguson rues failure cut gap boss sir alex ferguson left ruing manchester united failure close gap chelsea everton arsenal draw fulham premiership leaders chelsea gunners endured stalemate sunday united chance ground league ferguson bad rivals dropped weekend opportunity delivered united ahead alan smith minute bouba diop superb strike cancelled visitors lead minute ferguson result absolute give…	0	1	1	0	1	5	0	5	8	3	6	9	8	14	6	6	10	14	12
Old Firm pair handed suspensions Celtic's Henri Camara and Nacho Novo of Rangers have both been suspended for offences missed by the referee in a recent Old Firm game. Both were given automatic one-match bans and 12 additional disciplinary points for their actions. That means Novo will miss a further two games because of his prior record. Camara will miss one additional game. Novo was found guilt…	football	firm pair handed suspensions celtic henri camara nacho novo rangers suspended offences missed referee firm game automatic bans additional disciplinary actions novo games prior record camara additional game novo guilty stamping celtic stephen pearson camara punished kicking gregory vignal extremely disappointed lot add rangers manager alex mcleish novo punishment loss incident picked highlighted i…	0	1	1	0	1	5	0	5	8	3	6	6	5	14	5	9	4	14	12
Anelka apologises for criticism Manchester City striker Nicolas Anelka has issued an apology for criticising the ambitions of the club. Anelka was quoted in a French newspaper as saying he would like to play in the Champions League for a bigger club. But chairman John Wardle said: "I've spoken to Nicolas and he's apologised for anything that might have been mistakenly taken from the French press.…	football	anelka apologises criticism manchester city striker nicolas anelka issued apology criticising ambitions club anelka quoted french newspaper play champions league bigger club chairman john wardle spoken nicolas apologised mistakenly french press club nicolas told agrees club wardle speaking club annual meeting confirmed club received bids arsenal real madrid striker club owe french club psg purcha…	0	1	1	0	1	2	0	0	5	3	5	6	5	5	5	9	5	10	13
Ferguson rues failure to cut gap Boss Sir Alex Ferguson was left ruing Manchester United's failure to close the gap on Chelsea, Everton and Arsenal after his side's 1-1 draw with Fulham. Premiership leaders Chelsea and the Gunners endured a 2-2 stalemate on Sunday, giving United the chance to make up some ground in the league. But Ferguson said: "I think what makes it so bad is that both our riva…	football	ferguson rues failure cut gap boss sir alex ferguson left ruing manchester united failure close gap chelsea everton arsenal draw fulham premiership leaders chelsea gunners endured stalemate sunday united chance ground league ferguson bad rivals dropped weekend opportunity delivered united ahead alan smith minute bouba diop superb strike cancelled visitors lead minute ferguson result absolute give…	0	1	1	0	1	5	0	5	8	3	6	9	8	14	6	6	10	14	12
Everton's Weir cools Euro hopes Everton defender David Weir has played down talk of European football, despite his team lying in second place in the Premiership after beating Liverpool. Weir told BBC Radio Five Live: "We don't want to rest on our laurels and say we have achieved anything yet. "I think you start taking your eye off the ball if you make statements and look too far into the future. …	football	everton weir cools euro hopes everton defender david weir played talk european football team lying premiership beating liverpool weir told bbc radio live rest laurels achieved start eye ball statements future start predictions fall trouble matters game hard league injuries suspensions cost badly lot	0	1	1	0	1	2	0	0	5	5	5	6	5	5	5	9	8	16	6
Spain coach faces racism inquiry Spain's Football Federation has initiated disciplinary action against national coach Luis Aragones over racist comments about Thierry Henry. If found guilty Aragones could lose his job or face a fine of about 拢22,000. The federation had initially declined to take action against Aragones after comments he made during a national team training session in October. But…	football	spain coach racism inquiry spain football federation initiated disciplinary action national coach luis aragones racist comments thierry henry guilty aragones lose job fine federation initially declined action aragones comments national team training session october president angel maria villar changed mind request spain commission aragones insisted comments henry arsenal jose antonio reyes meant …	0	1	1	0	1	5	0	5	4	3	7	6	5	14	5	9	5	10	14
Spain coach faces racism inquiry Spain's Football Federation has initiated disciplinary action against national coach Luis Aragones over racist comments about Thierry Henry. If found guilty Aragones could lose his job or face a fine of about 拢22,000. The federation had initially declined to take action against Aragones after comments he made during a national team training session in October. But…	football	spain coach racism inquiry spain football federation initiated disciplinary action national coach luis aragones racist comments thierry henry guilty aragones lose job fine federation initially declined action aragones comments national team training session october president angel maria villar changed mind request spain commission aragones insisted comments henry arsenal jose antonio reyes meant …	0	1	1	0	1	5	0	5	4	3	7	6	5	14	5	9	5	10	14
Benitez deflects blame from Dudek Liverpool manager Rafael Benitez has refused to point the finger of blame at goalkeeper Jerzy Dudek after Portsmouth claimed a draw at Anfield. Dudek fumbled a cross before Lomana LuaLua headed home an injury-time equaliser, levelling after Steven Gerrard put Liverpool ahead. Benitez said: "It was difficult for Jerzy. It was an unlucky moment. "He was expecting a…	football	benitez deflects blame dudek liverpool manager rafael benitez refused finger blame goalkeeper jerzy dudek portsmouth claimed draw anfield dudek fumbled cross lomana lualua headed equaliser levelling steven gerrard liverpool ahead benitez difficult jerzy unlucky moment expecting cross matthew taylor shot blame happened benitez admitted costly loss liverpool derby defeat everton disappointing draw …	0	1	1	0	1	2	0	0	5	5	5	10	7	5	15	0	8	16	6
Bellamy fined after row Newcastle have fined their Welsh striker Craig Bellamy two weeks' wages - about 拢80,000 - following his row with manager Graeme Souness. But Bellamy, 25, has not been put on the transfer list, although he did not train with the first team on Tuesday. Magpies chairman Freddy Shepherd told the Newcastle Evening Chronicle: "It is not about money. It is about a player thinking…	football	bellamy fined row newcastle fined welsh striker craig bellamy weeks wages row manager graeme souness bellamy transfer list train team tuesday magpies chairman freddy shepherd told newcastle evening chronicle money player thinking bigger club individual chairman manager player souness dropped bellamy sunday game arsenal claiming welshman feigned injury play position heard manager shock bellamy lyi…	0	1	1	0	1	5	0	5	8	3	6	6	5	14	5	9	5	14	13
McClaren eyes Uefa Cup top spot Steve McClaren wants his Middlesbrough team to win their Uefa Cup group by beating Partizan Belgrade. Boro have already qualified for the knockout stages alongside Partizan and Villareal, at the expense of Lazio. But boss McClaren is looking for a victory which would mean they avoid a team that has played in the Champions League in Friday's third-round draw. "To ne…	football	mcclaren eyes uefa cup top spot steve mcclaren middlesbrough team win uefa cup beating partizan belgrade boro qualified knockout stages alongside partizan villareal expense lazio boss mcclaren victory avoid team played champions league friday draw win finish top fantastic tough mcclaren draw toughest proved lazio favourites villarreal partizan fantastic experience europe pleasing business games w…	0	1	1	0	1	2	0	5	4	3	6	6	10	14	7	10	10	14	9
Spurs to sign Iceland U21 star Tottenham are primed to snap up Iceland Under-21 international Emil Hallfredsson after he impressed on trial at White Hart Lane. The 20-year-old midfielder, who plays for FH Hafnarfjordur, also starred in the Uefa Cup match against Scottish side Dunfermline earlier this season. Spurs have agreed a fee for the player, who has yet to agree personal terms. "He had offe…	football	spurs sign iceland star tottenham primed snap iceland international emil hallfredsson impressed trial white hart lane midfielder plays fh hafnarfjordur starred uefa cup match scottish dunfermline earlier season spurs agreed fee player agree personal terms offers clubs decided tottenham spurs sporting director frank arnesen player position talent time decided road bringing talent prospects tottenh…	0	1	1	0	1	5	0	5	8	3	6	6	5	14	5	9	5	14	13
McLeish ready for criticism Rangers manager Alex McLeish accepts he is going to be criticised after their disastrous Uefa Cup exit at the hands of Auxerre at Ibrox on Wednesday. McLeish told BBC Radio Five Live: "We were in pole position to get through to the next stage but we blew it, we absolutely blew it. "There's no use burying your head in the sand, we know we are going to get a lot of criti…	football	mcleish ready criticism rangers manager alex mcleish accepts criticised disastrous uefa cup exit hands auxerre ibrox wednesday mcleish told bbc radio live pole position stage blew absolutely blew burying head sand lot criticism bounce mcleish admitted team defending amateurish watching lose guy roux french disappointed chance losing goal corner amateur goal half mountain climb created chances hal…	0	1	1	0	1	5	0	5	8	3	6	6	5	14	5	9	4	14	13
O'Leary agrees new Villa contract Aston Villa boss David O'Leary signed a three-and-a-half year contract extension on Thursday, securing his future at the club until summer 2008. O'Leary's future was in question, but Villa chairman Doug Ellis said he was happy to secure the deal. "David's record since his arrival in 2003 is excellent and he shares the board's amibitions in taking this club forwar…	football	agrees villa contract aston villa boss david signed contract extension thursday securing future club summer future question villa chairman doug ellis happy secure deal david record arrival excellent shares board amibitions club forward told villa website reason pen paper deals sorted roy aitken steve mcgregor roy steve integral team stay time thursday ahead signing deal aston villa belong challen…	0	1	1	0	1	5	0	5	8	3	6	6	5	14	5	9	5	14	13
Gronkjaer agrees switch to Madrid Jesper Gronkjaer has agreed a move to Atletico Madrid from Birmingham City. The 27-year-old winger spent just five months at St Andrews following a 拢2.2m move from Chelsea in July after playing for Denmark at Euro 2004. He is set to move during the January transfer window in a deal rumoured to be about 拢1.4m, subject to a medical. "We will meet with the player's …	football	gronkjaer agrees switch madrid jesper gronkjaer agreed move atletico madrid birmingham city winger spent months st andrews move chelsea july playing denmark euro set move january transfer window deal rumoured subject medical meet player representative finalise contract decide sign atletico sporting director toni munoz gronkjaer targeted blues fans sarcastically applauded everton month boss steve …	0	1	1	0	1	2	0	5	8	3	6	6	5	14	5	9	5	10	13
Benitez 'to launch Morientes bid' Liverpool may launch an 拢8m January bid for long-time target Fernando Morientes, according to reports. The Real Madrid striker has been linked with a move to Anfield since the summer and is currently behind Raul, Ronaldo and Michael Owen at the Bernabeu. Liverpool boss Rafael Benitez is keen to bolster his forward options with Djibril Cisse out until next season.…	football	benitez launch morientes bid liverpool launch january bid target fernando morientes reports real madrid striker linked move anfield summer raul ronaldo michael owen bernabeu liverpool boss rafael benitez keen bolster forward options djibril cisse season attractive propostition keen leave admitted morientes control situation contract real decisions fee liverpool prospective deal real keen net cash…	0	1	1	0	1	2	0	0	5	5	5	10	7	5	15	0	8	16	6
Robertson out to retain Euro lure Hearts manager John Robertson hopes a place in the knock-out stages of the Uefa Cup could help keep some of his out-of-contract players at the club. "It could help. If we get through and have another European tie it may encourage players to stay at least until the end of the season," he said. "If we manage to get through it shows how well the club's progressing. …	football	robertson retain euro lure hearts manager john robertson hopes stages uefa cup players club european tie encourage players stay season manage club progressing clubs decide move win robertson ferencvaros basle fail beat feyenoord player prerogative playing european football incentive robertson players play football club committed europe helps bit game played murrayfield tynecastle uefa regulations…	0	1	1	0	1	5	0	5	8	3	6	6	5	14	5	9	5	14	13
Campbell rescues Arsenal Sol Campbell proved to be an unlikely match-winner to earn Arsenal a hard-fought win at Portsmouth. The England defender lashed home a 25-yard shot for his first goal in 16 months to take Arsenal back into second spot, five points behind Chelsea. But before Campbell scored the best two chances of the game fell to Pompey striker Ricardo Fuller. In the first half he blasted…	football	campbell rescues arsenal sol campbell proved earn arsenal win portsmouth england defender lashed shot goal months arsenal spot chelsea campbell scored chances game fell pompey striker ricardo fuller half blasted wide control half portsmouth plenty bodies ball deny arsenal space stages marking slack corner patrick vieira ball fell yards mistake arjan de zeeuw thierry henry pompey defence minutes b…	0	1	1	0	1	5	0	5	8	3	6	9	8	14	6	6	3	14	14
Reds sink 10-man Magpies Titus Bramble's own goal put Liverpool on the comeback trail as injury-hit Newcastle were well beaten at Anfield. Patrick Kluivert's close-range finish put Newcastle ahead after 31 minutes, but they were pegged back as Bramble headed in Steven Gerrard's corner. Neil Mellor gave Liverpool the lead before half-time from Milan Baros' pass before the Czech added a third after…	football	reds sink magpies titus bramble goal liverpool comeback trail newcastle beaten anfield patrick kluivert finish newcastle ahead minutes pegged bramble headed steven gerrard corner neil mellor liverpool lead milan baros pass czech rounding shay hour newcastle lee bowyer bookable offences liverpool brought luis garcia hamstring injury newcastle forced draft kluivert craig bellamy late withdrawal inj…	0	1	1	0	1	2	0	0	5	5	5	10	7	5	15	0	8	16	6
Strachan turns down Pompey Former Southampton manager Gordon Strachan has rejected the chance to become Portsmouth's new boss. The Scot was Pompey chairman Milan Mandaric's first choice to replace Harry Redknapp, who left Fratton Park for rivals Saints earlier in December. "I think it's a fantastic job for anybody apart from somebody who has just been the Southampton manager," Strachan told the B…	football	strachan pompey southampton manager gordon strachan rejected chance portsmouth boss scot pompey chairman milan mandaric choice replace harry redknapp left fratton park rivals saints earlier december fantastic job southampton manager strachan told bbc club director terry brady held initial talks strachan saturday scotland international joining southampton local rivals wise move memories sour memor…	0	1	1	0	1	5	0	5	8	3	6	6	5	14	5	9	5	14	13
Henry tipped for Fifa award Fifa president Sepp Blatter hopes Arsenal's Thierry Henry will be named World Player of the Year on Monday. Henry is on the Fifa shortlist with Barcelona's Ronaldinho and newly-crowned European Footballer of the Year, AC Milan's Andriy Shevchenko. Blatter said: "Henry, for me, is the personality on the field. He is the man who can run and organise the game." The winner…	football	henry tipped fifa award fifa president sepp blatter hopes arsenal thierry henry named player monday henry fifa shortlist barcelona ronaldinho european footballer ac milan andriy shevchenko blatter henry personality field organise game winner accolade named glittering ceremony zurich opera house shortlisted candidates women award mia hamm united germany birgit prinz brazilian youngster marta hamm …	0	1	1	0	1	5	0	5	8	3	6	6	5	14	5	9	4	14	14
Newcastle to join Morientes race Newcastle have joined the race to sign Real Madrid striker Fernando Morientes and scupper Liverpool's bid to snap up the player, according to reports. Liverpool were reported to have bid 拢3.5m for the 28-year-old Spanish international this week. But the Liverpool Echo newspaper has said Anfield boss Rafa Benitez will avoid a bidding war and instead turn his attent…	football	newcastle join morientes race newcastle joined race sign real madrid striker fernando morientes scupper liverpool bid snap player reports liverpool reported bid spanish international week liverpool echo newspaper anfield boss rafa benitez avoid bidding war attentions nicolas anelka real believed selling morientes monaco race player loan season reports liverpool lift offer bowing deal tuesday mori…	0	1	1	0	1	2	0	0	5	5	5	10	7	5	15	0	8	16	6
Blues slam Blackburn over Savage Birmingham have confirmed Blackburn made a bid for Robbie Savage - but managing director Karen Brady has called it "derisory". Rovers have reportedly offered 拢500,000 up front for the Wales star, 30, with the fee rising to 拢2.2m. But Brady told The Sun the bid was "a waste of fax paper and my time". She added: "The way things are going all this could affect the re…	football	blues slam blackburn savage birmingham confirmed blackburn bid robbie savage managing director karen brady called derisory rovers reportedly offered front wales star fee rising brady told sun bid waste fax paper time affect relationship clubs robbie head sale savage future birmingham source speculation weeks fans criticising performances club earlier season displays west brom aston villa impresse…	0	1	1	0	1	5	0	5	8	3	6	6	5	14	5	9	5	14	13
Gerrard happy at Anfield Liverpool captain Steven Gerrard has reiterated his desire to stay at Anfield and win trophies with the club. The 24-year-old England midfielder is determined to see out his contract, despite reported interest from Chelsea. He said: "I'm signed here for this season and another two so there is no situation. There's a lot of speculation but that's not down to me. "As club c…	football	gerrard happy anfield liverpool captain steven gerrard reiterated desire stay anfield win trophies club england midfielder determined contract reported chelsea signed season situation lot speculation club captain table champions league gerrard looked set move chelsea summer speculation switch stamford bridge arisen january transfer window approaching raised doubts reds future club prove title cha…	0	1	1	0	1	2	0	0	5	5	5	10	7	5	15	0	8	16	6
Beckham rules out management move Real Madrid midfielder David Beckham has no plans to become a manager when his playing career is over. "I am not interested in being a coach but I would like to have football schools," the England captain said on television station Canal Plus. "I have wanted to do that since I went to the Bobby Charlton school. I'm going to open one in London and one in LA. "My s…	football	beckham rules management move real madrid midfielder david beckham plans manager playing career coach football schools england captain television station canal bobby charlton school london la passion charity ambassador unicef pride beckham revealed priority winning spanish league title real madrid real slipped leaders barcelona defeat hands sevilla wednesday beckham admitted disappointing frustra…	0	1	1	0	1	2	0	0	8	3	6	6	5	14	5	9	5	10	13
Mexicans tracking unhappy Juninho Mexican outfit Red Sharks Veracruz hope to sign Juninho if the Brazilian decides to leave Celtic frustrated at his lack of first-team action. Their president, Gustavo Parente Sanchez, says Juninho "does not wish to remain in Scottish football anymore". Agent Brian Hassell insists that the 31-year-old Brazilian midfielder is determined to win back his place. "But,…	football	mexicans tracking unhappy juninho mexican outfit red sharks veracruz hope sign juninho brazilian decides leave celtic frustrated lack action president gustavo parente sanchez juninho remain scottish football agent brian hassell insists brazilian midfielder determined win manager pick ball game told sun juninho deserves respect kid hassell warns juninho reconsider future celtic games january trans…	0	1	1	0	1	5	0	5	8	3	6	6	5	14	5	9	5	10	13
Celtic unhappy over Bulgaria date Martin O'Neill hopes to block Stilian Petrov's call-up by Bulgaria during Celtic's busy festive programme. The Celtic manager does not view the friendly against Valenciana - a region of Spain - on 28 December as important. "I can't say I was overly pleased at the fixture being played just after Christmas," said O'Neill. "We will have to speak with the Bulgarian F…	football	celtic unhappy bulgaria martin hopes block stilian petrov bulgaria celtic busy festive programme celtic manager view friendly valenciana region spain december overly pleased fixture played christmas speak bulgarian fa prerogative arrange fixture prerogative handle bulgaria game celtic boxing day meeting hearts january fixture livingston believes extra game midfielder season injury organised game …	0	1	1	0	1	5	0	5	8	3	6	6	5	14	5	9	5	14	13
Robben and Cole earn Chelsea win Cheslea salvaged a win against a battling Portsmouth side just as it looked like the Premiership leaders would have to settle for a point. Arjen Robben curled in a late deflected left-footed shot from the right side of Pompey's box to break the home side's brave resistance. Chelsea had been continually frustrated but Joe Cole added a second with a 20-yard shot in …	football	robben cole earn chelsea win cheslea salvaged win battling portsmouth looked premiership leaders settle arjen robben curled late deflected shot pompey box break brave resistance chelsea continually frustrated joe cole shot nigel quashie pompey chance effort tipped fratton park crowd voice usual portsmouth held chelsea managed carve chances striker didier drogba snapped angled shot force keeper sh…	0	1	1	0	1	5	0	0	6	5	6	9	8	6	8	6	14	9	5
Newcastle line up Babayaro Newcastle manager Graeme Souness is closing in on signing Chelsea defender Celestine Babayaro when the transfer window reopens. Souness is bidding to bolster his defence and, according to reports, contract negotiations are at an advanced stage with the player. Babayaro has been in the Premiership since 1997 when he moved to Chelsea for 拢2.25m from Anderlecht. But the 26…	football	newcastle babayaro newcastle manager graeme souness closing signing chelsea defender celestine babayaro transfer window reopens souness bidding bolster defence reports contract negotiations advanced stage player babayaro premiership moved chelsea anderlecht surplus requirements season souness drawn specifics individual players chairman hard couple months deals day strengthen hoping coming weeks	0	1	1	0	1	2	0	5	6	3	6	6	5	6	5	9	5	9	13
Mourinho takes swipe at Arsenal Chelsea boss Jose Mourinho has attempted to pile the pressure on title rivals Arsenal ahead of the Gunners facing Newcastle on Wednesday. Arsenal will play the Magpies a day after Chelsea beat Portsmouth during a busy festive programme. And Mourinho said: "They always seem to have two or three days' rest in which to recover. Perhaps it's something to do with the te…	football	mourinho takes swipe arsenal chelsea boss jose mourinho attempted pile pressure title rivals arsenal ahead gunners facing newcastle wednesday arsenal play magpies day chelsea beat portsmouth busy festive programme mourinho days rest recover television schedule players tired john terry chelsea boss jose mourinho admitted lucky win fratton park unhappy amount games short space time time play matche…	0	1	1	0	1	2	0	0	6	5	6	9	8	6	8	6	14	9	5
Wenger shock at Newcastle dip Arsenal manager Arsene Wenger has admitted he is at a loss to explain why Newcastle are languishing in the bottom half of the table. The Gunners travel to St James' Park on Wednesday, with Newcastle 14th in the Premiership after a troubled season. And Wenger said: "At the beginning of the season you would expect them to be fighting for the top four. "I don't know how…	football	wenger shock newcastle dip arsenal manager arsene wenger admitted loss explain newcastle languishing bottom half table gunners travel st james park wednesday newcastle premiership troubled season wenger season expect fighting top injuries arsenal game victory fulham sunday wenger prepare game win previous newcastle shape fatigue wo play weeks players coming rotate bit play season players squad de…	0	1	1	0	1	5	0	5	8	3	6	9	8	14	6	6	3	14	14
Ferguson hails Man Utd's resolve Manchester United's Alex Ferguson has praised his players' gutsy performance in the 1-0 win at Aston Villa. "That was our hardest away game of the season and it was a fantastic game of football, end-to-end with lots of good passing," said the Old Trafford boss. "We showed lots of character and guts and we weren't going to lose. "I look at that fixture and think we…	football	ferguson hails utd resolve manchester united alex ferguson praised players gutsy performance win aston villa hardest game season fantastic game football lots passing trafford boss lots character guts lose fixture won arsenal chelsea villa players ferguson hailed senior stars ryan giggs roy keane bench injured john roy brought bit composure midfield player giggs tremendous threat brings tremendous…	0	1	1	0	1	5	0	5	8	3	6	9	8	14	6	6	10	14	12
TV calls after Carroll error Spurs boss Martin Jol said his team were "robbed" at Manchester United after Pedro Mendes' shot clearly crossed the line but was not given. "The referee is already wearing an earpiece so why can't we just stop the game and get the decision right," said Jol after the 0-0 draw. "But at the end of the day it's so obvious that Pedro's shot was over the line it's incredibl…	football	tv calls carroll error spurs boss martin jol team robbed manchester united pedro mendes shot crossed referee wearing earpiece game decision jol draw day obvious pedro shot incredible feel robbed difficult linesman referee mendes shot yards united goalkeeper roy carroll spilled ball net hooking jol talking ball couple centimetres inch metre inside goal annoys watching tv monitor incident occurring…	0	1	1	0	1	5	0	5	8	3	6	9	8	14	6	6	4	14	12
FA charges Mourinho Chelsea manager Jose Mourinho has been charged with improper conduct by the Football Association. The move follows comments on Chelsea TV after the Carling Cup semi-final first leg draw against Manchester United. Mourinho suggested United boss Sir Alex Ferguson had put pressure on referee Neale Barry at half-time. The Chelsea boss, who has until 14 February to respond, said: "…	football	fa charges mourinho chelsea manager jose mourinho charged improper conduct football association move comments chelsea tv carling cup leg draw manchester united mourinho suggested united boss sir alex ferguson pressure referee neale barry chelsea boss february respond half whistle whistle fault fault cheat cheat fa action comments issue chelsea defender john terry match terry captain word listen d…	0	1	1	0	1	2	0	0	6	5	6	9	8	6	8	6	14	9	5
Clean sweep impossible - Mourinho Chelsea boss Jose Mourinho says his side have little chance of winning all four major trophies this season. The Blues are seven points clear in the league after beating Middlesbrough, and into the Carling Cup semi-finals and the Champions League knockout stages. "We want to win something, but I think it is impossible to win all four trophies," Mourinho admitted. …	football	clean sweep impossible mourinho chelsea boss jose mourinho chance winning major trophies season blues league beating middlesbrough carling cup champions league knockout stages win impossible win trophies mourinho admitted squad fa cup saturday carling cup week injury list demanding schedule mourinho insists competition chelsea scunthorpe saturday watched watch team change players game change butw…	0	1	1	0	1	2	0	0	6	5	6	9	8	6	8	6	14	9	5
Wenger refuses to give up title Arsene Wenger refused to concede the title, despite Arsenal falling seven points behind Chelsea after their 1-1 draw with Manchester City at Highbury. He said: "We have to believe we can come back and give everything in every game. For us to give up and say Chelsea have won it would be criminal. "I am very concerned because we have never been so far behind and Chel…	football	wenger refuses title arsene wenger refused concede title arsenal falling chelsea draw manchester city highbury game chelsea won criminal concerned chelsea dropping season wenger blamed mounting injury list sol campbell dennis bergkamp unavailable failure beat city inexperienced qualities team played settled played half half caught mental qualities half outstanding chance chance feel team gunners …	0	1	1	0	1	5	0	5	8	3	6	9	8	6	6	6	3	14	14
Henchoz prefers England to Gers Rangers could miss out on Liverpool defender Stephane Henchoz because he wants to continue playing in England. The Ibrox club have offered a deal to the Swiss international, 30, who is out of contract at the end of the season and has been linked with Southampton. More talks are planned between Rangers and the player's agent on Wednesday, but Henchoz said: "Actually…	football	henchoz prefers england gers rangers liverpool defender stephane henchoz continue playing england ibrox club offered deal swiss international contract season linked southampton talks planned rangers player agent wednesday henchoz stay premiership rangers offer henchoz leave liverpool criticising manager rafael benitez rangers replacement boumsong moved newcastle blackburn defender reported reject…	0	1	1	0	1	2	0	0	5	5	5	10	7	5	15	0	8	16	6
Keane returns to Republic squad Manchester United skipper Roy Keane is back in the Republic of Ireland squad for the 9 February friendly against Portugal at Lansdowne Road. Keane was rested for the last game with Croatia in November but has been recalled as boss Brian Kerr prepares for a World Cup qualifier in Israel. Clinton Morrison, Stephen Carr, Andy O'Brien, Matt Holland, Andy Reid and Jon M…	football	keane returns republic squad manchester united skipper roy keane republic ireland squad february friendly portugal lansdowne road keane rested game croatia november recalled boss brian kerr prepares cup qualifier israel clinton morrison stephen carr andy matt holland andy reid jon macken injury chelsea winger damien duff set win international cap kerr named squad emphasis blend experience youth m…	0	1	1	0	1	5	0	5	8	3	6	9	8	14	6	6	10	14	12
Newcastle move in for Boa Morte Newcastle manager Graeme Souness has confirmed Fulham striker Luis Boa Morte is his latest transfer target. Souness wants to add the 拢3m-rated Portugal international to his revamped squad during the transfer window. He said: "We have declared an interest in him. The chairman is working hard to bring at least one more body in before this window goes past." Souness m…	football	newcastle move boa morte newcastle manager graeme souness confirmed fulham striker luis boa morte transfer target souness add portugal international revamped squad transfer window declared chairman hard bring body window souness offer olivier bernard titus bramble lee bowyer bait deal newcastle boss unveiled boumsong buy ranger defender celestine babayaro capture chelsea revamps squad fulham insi…	0	1	1	0	1	5	0	5	8	3	6	6	5	14	5	9	5	14	13
Sanchez targets NI win in Warsaw Northern Ireland manager Lawrie Sanchez has targeted the 30 March game in Poland as their most important in the World Cup qualifying campaign. While fans are savouring the prospect of playing England at Old Trafford four days earlier, Sanchez knows the Polish clash holds the key to second place. "If we do not beat Poland the group will be almost dead. They will be…	football	sanchez targets ni win warsaw northern ireland manager lawrie sanchez targeted march game poland cup qualifying campaign fans savouring prospect playing england trafford days earlier sanchez polish clash holds key beat poland dead pretty sanchez beat england poland game sanchez fourth poles games left northern ireland ground warsaw qualifying cup closed beat poland sanchez time european champions…	0	0	0	2	0	4	4	7	0	0	0	0	0	0	0	3	7	12	15
FAI secures &#163;7m sponsorship deal The Football Association of Ireland has signed a 拢7million, six-year sponsorship deal with Umbro. The deal is the second largest in sponsorship in FAI history. It will bring in 拢4.8m in cash and be worth more than 拢2m in kit supplies with other bonus payments linked to performance in major competitions. "It brings immediate and lasting benefits to the develop…	football	fai secures sponsorship deal football association ireland signed sponsorship deal umbro deal largest sponsorship fai history bring cash worth kit supplies bonus payments linked performance major competitions brings lasting benefits development generation people play football fai chief john delaney umbro deal stable platform period provide football community support football association ireland se…	0	1	1	0	1	5	0	5	8	3	6	6	5	14	5	9	4	12	13
Highbury will be our Cup final Arsenal is a very special place for me because it is one of the few away games I remember going to when I was a boy. I can't remember what the year was but I was so young I was in short trousers. My father worked for English Steel Corporation, he was a crane driver and worked 12-hour shifts. Every year they had a trip to London and in this particular year they were …	football	highbury cup final arsenal special games remember boy remember short trousers father english steel corporation crane driver shifts trip london london watch arsenal play remember smuggling bus imperial hotel remember vividly smuggling turnstiles highbury remember massive clock memory forget marvellous game arsenal fans absolutely brilliant sheffield united fans mixed lost joe shaw player day satur…	0	1	1	0	1	5	0	5	8	3	6	9	8	14	6	6	3	14	14
Beckham defends form for England England captain David Beckham insists he is not concerned by criticism of his displays for club and country. "As long as I'm happy with my form for Real Madrid and England, whatever anybody else says doesn't really matter," said Beckham. "The most important thing for me is that I'm comfortable with the way I'm playing - I must admit, the last month has been my bes…	football	beckham defends form england england captain david beckham insists concerned criticism displays club country happy form real madrid england matter beckham comfortable playing admit month month lot games coming real england midfielder feels coach wanderley luxemburgo arrival madrid lifted spanish giants exciting manager playing attractive football months beckham explained totally changed lot harde…	0	1	1	0	1	2	0	5	8	3	6	6	5	14	5	9	5	10	13
Beckham hints at Man Utd return England captain David Beckham said he would return to Manchester United if he ever leaves Real Madrid. Beckham left United in July 2003 after falling out with Sir Alex Ferguson and has been linked with a return to London if he decided to move back to England. "If I ever leave I would go back to United and work with Sir Alex again, definitely," he told the Daily Mir…	football	beckham hints utd return england captain david beckham return manchester united leaves real madrid beckham left united july falling sir alex ferguson linked return london decided move england leave united sir alex told daily mirror manchester united club grew career beckham insisted happy real plenty prove spain half played football months happy playing players win top prizes spanish league champ…	0	1	1	0	1	5	0	5	8	3	6	6	5	14	5	9	5	10	12
Beckham's chat reigns in Spain England captain David Beckham won a spontaneous round of applause from journalists as he made his first real attempt at speaking Spanish in public. The Real Madrid midfielder tried a curious mix of Spanish and English at a news conference. "El partido con Atletico was mucho mejor para todos," he declared. And yes, that was 'was'. Of course, in English it all transla…	football	beckham chat reigns spain england captain david beckham won spontaneous round applause journalists real attempt speaking spanish public real madrid midfielder curious mix spanish english news conference el partido con atletico mucho mejor para todos declared english translates game atletico smiling beckham wearing white woolly hat talking victory fierce city rivals blushed fielded questions stilt…	0	1	1	0	1	2	0	5	8	3	6	6	5	14	5	9	5	10	13
Gerrard future not decided by Cardiff loss Steven Gerrard's own goal in Liverpool's Carling Cup defeat against Chelsea sparked yet another round of speculation about his Anfield future. There was no denying the irony of Gerrard's mishap, coming as it did in a cup final against the club that almost paid 拢30m for him last summer. And that irony was not missed by the media - or indeed Chelsea's supp…	football	gerrard future decided cardiff loss steven gerrard goal liverpool carling cup defeat chelsea sparked round speculation anfield future denying irony gerrard mishap coming cup final club paid summer irony missed media chelsea supporters incident defeat shape stays liverpool wrong happened time game mistake mistake liverpool defenders ball pull conspiracy theory goal combined liverpool defeat finall…	0	1	1	0	1	2	0	0	5	5	5	10	7	5	15	0	8	16	6
Barwick installed as new FA boss New Football Association chief executive Brian Barwick has been handed the task of restoring the organisation's credibility. The FA has suffered with financial problems and the Faria Alam scandal. Sports minister Richard Caborn said: "Brian's main task will be to restore the respect and authority. "The FA has taken some knocks and it will be up to him to pick the …	football	barwick installed fa boss football association chief executive brian barwick handed task restoring organisation credibility fa suffered financial faria alam scandal sports minister richard caborn brian main task restore respect authority fa knocks pick organisation respected game barwick jobs bottom claim chelsea held illegal meeting arsenal england defender ashley cole january fa decide leave ma…	0	1	1	0	1	5	0	5	8	3	6	6	8	6	8	6	4	9	5
Barwick calls for Highbury calm New Football Association chief Brian Barwick pleaded with Arsenal and Manchester United to show calm ahead of their Highbury showdown. "When these two great teams meet it should represent all that is good about our domestic game," said Barwick, who started at the FA on Monday. "It shouldn't be the subject of recrimination and revenge for weeks and months following.…	football	barwick calls highbury calm football association chief brian barwick pleaded arsenal manchester united calm ahead highbury showdown teams meet represent domestic game barwick started fa monday subject recrimination revenge weeks months set rest game barwick underlined determination clamp diving cheating unequivocally called bid clean game issues game concerns personally technically termed real di…	0	1	1	0	1	5	0	5	8	3	6	6	8	14	6	6	4	14	14
Linesman defends disallowed goal Linesman Rob Lewis has defended his role in Tottenham's disallowed goal against Manchester United. Pedro Mendes' shot clearly crossed the line and Lewis has been criticised for his positioning in the incident. Lewis said: "The Spurs player shot from distance and I was doing my primary job which was to stand in line with the last defender and watch for an offside. …	football	linesman defends disallowed goal linesman rob lewis defended role tottenham disallowed goal manchester united pedro mendes shot crossed lewis criticised positioning incident lewis spurs player shot distance primary job stand defender watch offside faster linford christie ball landed yards goal impossible judge crossed tottenham boss martin jol criticised decision cost referee wearing earpiece gam…	0	1	1	0	1	5	0	5	8	3	6	9	8	14	6	6	4	14	12
Bookies pay out on Spurs 'goal' A bookmaker will pay out to punters who bet on Pedro Mendes to score the first goal in Tottenham's controversial game against Manchester United. The match at Old Trafford finished goalless after Mendes' long-range shot was fumbled by home keeper Roy Carroll. TV replays showed the ball went over the line, but the incident was missed by the referee and his assistant.…	football	bookies pay spurs bookmaker pay punters bet pedro mendes score goal tottenham controversial game manchester united match trafford finished goalless mendes shot fumbled keeper roy carroll tv replays ball incident missed referee assistant william hill honour bets chance mendes score rival firm ladbrokes hills spokesman graham sharpe admitted handful customers mendes score bets struck mendes score a…	0	1	1	0	1	5	0	5	8	3	6	9	8	14	6	6	4	14	12
Gunners clock up winning record Arsenal claimed the Premiership title and re-wrote the record books in the process by going the entire 38-game season unbeaten. It was the first time a team had gone through a top-flight season undefeated since Preston in the 1888-89 season. Arsenal romped home by a convincing 11-point margin from Chelsea. The closest they came to defeat was in the so-called "Battl…	football	gunners clock winning record arsenal claimed premiership title record books process entire season unbeaten time team season undefeated preston season arsenal romped convincing margin chelsea closest defeat battle trafford ruud van nistelrooy missed penalty goalless draw game cast shadow season van nistelrooy surrounded angry arsenal players arsenal lauren banned games martin keown matches ray par…	0	1	1	0	1	5	0	5	6	3	6	9	8	6	8	6	10	14	5
Fifa agrees goal-line technology Fifa is expected to use a football containing a microchip as part of new goal-line technology in September's Under-17 World championships in Peru. The game's governing body has agreed to the experiment in a bid to end controversies over goal-line decisions. It follows a presentation by sports manufacturer Adidas to the International FA board in Cardiff. The compan…	football	fifa agrees technology fifa expected football microchip technology september championships peru game governing body agreed experiment bid controversies decisions presentation sports manufacturer adidas international fa board cardiff company tested device game nuremberg reserve team ahead board meeting football microchip inside crosses referee alerted directly system video replays delay game impre…	0	1	1	0	1	5	0	5	8	3	6	6	5	14	6	6	4	14	12
Owen may have to return home Michael Owen has delivered the first hint that he may consider his future away from Real Madrid if he fails to get regular first-team football - and no-one can blame him. Owen displayed his world-class ability once again with another goal after coming on as a substitute in Real's win at Osasuna on Sunday. And therein lies his problem. Michael may have made a rod for h…	football	owen return michael owen delivered hint future real madrid fails regular football blame owen displayed ability goal coming substitute real win osasuna sunday lies michael rod fantastic performances coming substitute coaches real madrid decided role coming sooner michael hope performances earn regular starting opportunity rest assured chance bench earlier season michael pride ensure stuck branded …	0	1	1	0	1	2	0	0	6	3	6	9	8	6	8	6	5	10	12
Moyes U-turn on Beattie dismissal Everton manager David Moyes will discipline striker James Beattie after all for his headbutt on Chelsea defender William Gallas. The Scot initially defended Beattie, whose dismissal put Everton on the back foot in a game they ultimately lost 1-0, saying Gallas overreacted. But he has had a rethink after looking over the video evidence again. He said: "I believe t…	football	moyes beattie dismissal everton manager david moyes discipline striker james beattie headbutt chelsea defender william gallas scot initially defended beattie dismissal everton foot game ultimately lost gallas overreacted rethink video evidence set record straight conceding dismissal correct moyes comments saturday final whistle opportunity quick incident club website reported beattie unrepentant …	0	1	1	0	1	2	0	0	6	5	6	9	8	6	8	6	14	9	5
Owen dismisses fresh Real rumours England striker Michael Owen helped inspire Real Madrid to a 2-1 win at Osasuna in La Liga on Sunday before insisting he is happy at the club. The ex-Liverpool player started on the bench, an on-going situation that has led to rumours of a Premiership return. Owen has admitted he is frustrated at his lack of first-team chances but is determined to succeed in Spai…	football	owen dismisses fresh real rumours england striker michael owen helped inspire real madrid win osasuna la liga sunday insisting happy club player started bench situation led rumours premiership return owen admitted frustrated lack chances determined succeed spain play minutes unhappy substitute goal game grounds difficult owen happy goal vital goal win barcelona beating real zaragoza saturday deci…	0	1	1	0	1	2	0	0	5	3	5	6	5	14	5	9	5	10	13
A need to limit foreign numbers With all the top clubs vying for the title and the Champions League, at least the FA Cup gave an opportunity for one or two of the younger lads at the major clubs to get a game in the first team. I don't personally like to see weakened sides in the competition, but it seems in some cases it's the only chance for the young lads to get some first-team experience. Ove…	football	limit foreign top clubs vying title champions league fa cup opportunity lads major clubs game team personally weakened competition chance lads experience influx foreign players englishman freedom movement time countries limit overseas players including europeans trend noticeable influx foreign bosses arsene wenger claudio ranieri jose mourinho foreign market english chelsea signing englishmen for…	0	1	1	0	1	2	0	5	8	3	6	6	5	14	5	9	5	14	13
No lack of Christmas spirit It's that time of year when footballers and managers brace themselves for what I think is the most important period of the entire season. I was thinking to myself last week that the last time I had a Christmas off was 39 years ago. I have never been out of work at Christmas as a player or manager since I was 17 when our youth team coach at Chesterfield, a chap called R…	football	lack christmas spirit time footballers managers brace period entire season thinking week time christmas ago christmas player manager youth team coach chesterfield chap called reg wright christmans games changed dramatically terms discipline players lot responsibility days talking changed outlook continue playing level managers trust players squad warn excess massive bonus players squad training s…	0	1	1	0	1	5	0	5	8	3	6	6	5	14	5	9	5	14	13
FA ready to test out goal bleeper The Football Association may volunteer to test a new goal-line bleeper when the game's bosses meet this weekend. The technology will be presented at the annual meeting of the International FA Board (IFAB), made up of Fifa and the four home nation associations. The bleeper-type system alerts the referee when the ball, containing a micro-chip, crosses the goal-line…	football	fa ready test goal bleeper football association volunteer test bleeper game bosses meet weekend technology annual meeting international fa board ifab fifa nation associations system alerts referee ball crosses calls technology tottenham goal controversially disallowed month spurs denied winner manchester united pedro mendes effort crossing mendes speculative strike halfway comfortably crossed err…	0	1	1	0	1	5	0	5	8	3	6	6	8	14	6	6	4	14	12
The gloves are off When Arsenal play Manchester United on Tuesday, a fixture that is usually a title-decider has this time been relegated to undercard status. Both teams will be playing for pride and hoping for a win to seize on any possible hiccup by Premiership leaders Chelsea. Arsenal and United have been left in the slipstream of the Stamford Bridge outfit and the reason, according to many ex…	football	gloves arsenal play manchester united tuesday fixture time relegated undercard status teams playing pride hoping win seize hiccup premiership leaders chelsea arsenal united left slipstream stamford bridge outfit reason experts goalkeeping woes chelsea keeper petr cech gunners missed signing conceded league goals season rivals quality questioned mistakes misdemeanours arsenal goals jens lehmann dr…	0	1	1	0	1	5	0	5	8	3	6	9	8	14	6	6	3	14	14
Underdogs have more fun I've always had a soft spot for the FA Cup, it's a fabulous competition - the best in the world - and there's nothing quite like it. We play Aston Villa in the third round on Saturday, and on paper it should be a straightforward win for them - but it's horrible being in the favourites' dressing room. It's a terrible feeling as a manager when you are expected to win. You're…	football	underdogs fun soft spot fa cup fabulous competition play aston villa round saturday paper straightforward win horrible favourites dressing terrible feeling manager expected win wondering players doubts mind instil players professional prepared battle ahead ready crowd bad pitch underdogs throw grasp underdogs hand lose enjoy lower division players publicity surrounds cup manager talk talking stru…	0	1	1	0	1	5	0	5	8	3	6	6	5	14	5	9	5	14	13
Bitter Santini hits out at Spurs Former Tottenham coach Jacques Santini said he quit partly because he felt agreements with the club were broken. Santini, 52, left in November after just 13 games in charge amid tensions with sporting director Frank Arnesen. "They promised me a big apartment on the beach and I found myself 200m from the sea with a view of my neighbours," he told France's Journal d…	football	bitter santini hits spurs tottenham coach jacques santini quit partly agreements club broken santini left november games charge amid tensions sporting director frank arnesen promised apartment beach sea view neighbours told france journal di dimanche coach admitted dug grave agreeing join club euro regret signed tottenham waited euro missed chance santini spurs transfer policy learned day team ph…	0	1	1	0	1	5	0	5	8	3	6	6	5	14	5	9	5	10	13
Uefa threat over foreign quotas Uefa has warned clubs planning to ignore its proposal for quotas of homegrown players in squads. From 2006-07 teams must submit a 25-man 'A' squad with at least two players from the club academy and two others from the same national association. Clubs may be punished with reduced squads if they refuse to comply, although Uefa has ruled out legal action against offe…	football	uefa threat foreign quotas uefa warned clubs planning ignore proposal quotas homegrown players squads teams submit squad players club academy national association clubs punished reduced squads refuse comply uefa ruled legal action offending clubs arsenal overseas players monday game crystal palace plan introduced season figures rise seasons squad academy players team country sanction fairly simpl…	0	1	1	0	1	5	0	5	8	3	6	6	5	14	5	9	5	14	13
[truncated: 272 more rows]
