# Supplementary material for: An adaptive method for determining the optimal number of topics in topic modeling
Source: PeerJ journal article supplement (doi:10.7717/peerj-cs.2723), 2025-02-28
Supplement: Code.zip [file reuters_nmf.xlsx]

## Sheet: Sheet1
new	type	new_nltk	topic2	topic3	topic4	topic5	topic6	topic7	topic8	topic9	topic10	topic11	topic12	topic13	topic14	topic15	topic16	topic17	topic18	topic19	topic20
supreme court stand ruling corp lt pay mln dlrs company controlled saudi businessman court denied appeal challenging arbitration ruling pay mln dlrs commissions stemming arms contracts won saudi arabia seeking sell aircraft supporting services saudi arabia hired firm marketing representative paid mln dlrs commissions firm international marketing defense department records sales saudi arabia perio…	1	supreme court stand ruling corp lt pay mln dlrs company controlled saudi businessman court denied appeal challenging arbitration ruling pay mln dlrs commissions stemming arms contracts won saudi arabia seeking sell aircraft supporting services saudi arabia hired firm marketing representative paid mln dlrs commissions firm international marketing defense department records sales saudi arabia perio…	0	2	1	2	0	0	5	6	2	7	0	0	0	0	0	0	6	9	7
house agriculture committee approved proposals extend life export enhancement program eep fiscal urged reagan administration offer eep wheat soviet union proposals approved amendments comprehensive trade bill moving congress addition amendments eep committee approved proposals restrict imports lamb sugar products tobacco amendments imports uncertain future house committee jurisdiction trade legis…	1	house agriculture committee approved proposals extend life export enhancement program eep fiscal urged reagan administration offer eep wheat soviet union proposals approved amendments comprehensive trade bill moving congress addition amendments eep committee approved proposals restrict imports lamb sugar products tobacco amendments imports uncertain future house committee jurisdiction trade legis…	1	1	3	4	5	3	7	7	5	8	7	3	3	3	3	2	2	2	13
department forecast french season soft wheat stocks double premature surprising french cereal organisation officials cereals intervention board onic wheat association national union agricultural cereal cooperatives forecast exports season stocks officials figure stocks mln tonnes mln surprising record yield forecast april french feed cereals institute forecast mid april average yield tonnes hecta…	1	department forecast french season soft wheat stocks double premature surprising french cereal organisation officials cereals intervention board onic wheat association national union agricultural cereal cooperatives forecast exports season stocks officials figure stocks mln tonnes mln surprising record yield forecast april french feed cereals institute forecast mid april average yield tonnes hecta…	0	0	0	0	1	3	1	0	1	2	8	6	6	7	9	4	9	0	12
major farm unusual step releasing joint statement urging congressional leaders tinker existing farm law meetings house agriculture committee chairman de la tex senate agriculture committee chairman patrick leahy vt issued statement lawmakers resist efforts overhaul month law operating crop marketing farm included american farm bureau federation american soybean association national association na…	1	major farm unusual step releasing joint statement urging congressional leaders tinker existing farm law meetings house agriculture committee chairman de la tex senate agriculture committee chairman patrick leahy vt issued statement lawmakers resist efforts overhaul month law operating crop marketing farm included american farm bureau federation american soybean association national association na…	1	1	3	4	5	4	7	7	5	8	7	3	3	2	12	2	2	2	13
main paddy crop expected fall mln tonnes nov oct season previous mln estimate november actual mln ago thai rice mills association joint field survey late month association commerce ministry bank thailand paddy output northeast region lower expected drought provinces association rice growing low half november drought reduced total national sown paddy mln hectares mln ago main crop represents pct p…	1	main paddy crop expected fall mln tonnes nov oct season previous mln estimate november actual mln ago thai rice mills association joint field survey late month association commerce ministry bank thailand paddy output northeast region lower expected drought provinces association rice growing low half november drought reduced total national sown paddy mln hectares mln ago main crop represents pct p…	0	0	0	0	1	0	5	6	2	7	0	0	0	0	0	0	0	9	7
winter wheat crops western soviet union poland eastern czechoslovakia northern romania suffer winterkill private accu weather western ussr winter wheat light snow winterkill tonight tomorrow night temperatures drop minus degrees snow cover poland pct winter wheat reporting inches snow morning remaining pct winter wheat crops snow cover winterkill lowest temperatures minus degrees winter wheat eas…	1	winter wheat crops western soviet union poland eastern czechoslovakia northern romania suffer winterkill private accu weather western ussr winter wheat light snow winterkill tonight tomorrow night temperatures drop minus degrees snow cover poland pct winter wheat reporting inches snow morning remaining pct winter wheat crops snow cover winterkill lowest temperatures minus degrees winter wheat eas…	0	0	0	4	5	3	7	7	5	8	7	3	3	3	3	11	4	11	11
marketed maize production fall tonnes apr poor rainfall major producing agriculture minister told parliament southern provinces harvest pct level previous marketing nation lucky produce mln bags tonnes maize stated zambia setting irrigation fund canadian aid lessen effects poor rainfall	1	marketed maize production fall tonnes apr poor rainfall major producing agriculture minister told parliament southern provinces harvest pct level previous marketing nation lucky produce mln bags tonnes maize stated zambia setting irrigation fund canadian aid lessen effects poor rainfall	0	0	0	0	1	3	1	0	1	2	8	6	6	7	9	4	9	0	6
tanzania seeks export surplus tonnes maize bumper harvest agriculture minister paul yesterday maize crop officially estimated mln tonnes fraction marketed grain consumed farmers grew owned national milling corp sell tonnes maize stored country acting manager john tanzania tonnes storage capacity concentrated dar es salaam north central tanzania addition country tonnes flat storage capacity govern…	1	tanzania seeks export surplus tonnes maize bumper harvest agriculture minister paul yesterday maize crop officially estimated mln tonnes fraction marketed grain consumed farmers grew owned national milling corp sell tonnes maize stored country acting manager john tanzania tonnes storage capacity concentrated dar es salaam north central tanzania addition country tonnes flat storage capacity govern…	0	0	0	0	1	3	1	0	1	2	8	6	6	7	9	4	9	0	6
zealand tonnes wheat australia united agriculture department report export markets grains department deregulation zealand wheat board imports wheat australia possibility wheat purchases united shipping cost zealand eastern coast australia west coast united equal	1	zealand tonnes wheat australia united agriculture department report export markets grains department deregulation zealand wheat board imports wheat australia possibility wheat purchases united shipping cost zealand eastern coast australia west coast united equal	0	0	0	4	5	3	7	7	9	10	4	2	2	3	3	12	12	14	12
european community commission decided abolish special tax ecus tonne imposed exports spanish maize commission sources tax applies spanish sales ec ec countries required exports spanish ports south decision meeting cereals management committee tax introduced september time subsidy ecus tonne brought exports maize spain ec countries aim tax prevent maize imported spain ec subsidies sources spain re…	1	european community commission decided abolish special tax ecus tonne imposed exports spanish maize commission sources tax applies spanish sales ec ec countries required exports spanish ports south decision meeting cereals management committee tax introduced september time subsidy ecus tonne brought exports maize spain ec countries aim tax prevent maize imported spain ec subsidies sources spain re…	0	0	0	0	1	3	1	8	3	6	3	1	11	4	14	9	11	6	14
phillips petroleum raised contract price grades crude oil cts barrel effective increase brings posted price west texas intermediate west texas sour grades dlrs bbl phillips changed crude oil postings march price increase moves lt subsidiary marathon oil sun lt sun earlier	1	phillips petroleum raised contract price grades crude oil cts barrel effective increase brings posted price west texas intermediate west texas sour grades dlrs bbl phillips changed crude oil postings march price increase moves lt subsidiary marathon oil sun lt sun earlier	0	2	2	3	3	1	0	4	4	5	1	4	5	5	4	13	5	8	5
texas weekly usda crop report winter weather limited conditions improved week caused cattle panhandle cold wet weather covered weather dry fields limit planting delays grains progress cool temperatures slowed growth additional moisture fields head wheat rated pct fair pct pct excellent corn sorghum planting land preparation ahead schedule plains weather cotton planting lower valley	1	texas weekly usda crop report winter weather limited conditions improved week caused cattle panhandle cold wet weather covered weather dry fields limit planting delays grains progress cool temperatures slowed growth additional moisture fields head wheat rated pct fair pct pct excellent corn sorghum planting land preparation ahead schedule plains weather cotton planting lower valley	0	0	0	4	5	3	7	7	5	8	7	8	9	11	11	11	13	11	11
china raised purchase prices corn rice peanuts april encourage farmers grow official china commercial daily paper price paid corn northern provinces cities regions increased yuan foreign agricultural expert rise price paper price rice southern provinces cities raised yuan paper price round rice provinces regions cities central east northwest china increased yuan price details local authorities in…	1	china raised purchase prices corn rice peanuts april encourage farmers grow official china commercial daily paper price paid corn northern provinces cities regions increased yuan foreign agricultural expert rise price paper price rice southern provinces cities raised yuan paper price round rice provinces regions cities central east northwest china increased yuan price details local authorities in…	0	0	0	4	5	1	7	7	5	8	7	3	3	2	12	11	17	11	11
jordan boosted bids soft hard wheat export bonus private export sources jordan bid dlrs tonne soft wheat dlrs tonne hard red winter wheat tender tonnes hard soft wheat april november shipment earlier usda rejected bids dlrs varieties	1	jordan boosted bids soft hard wheat export bonus private export sources jordan bid dlrs tonne soft wheat dlrs tonne hard red winter wheat tender tonnes hard soft wheat april november shipment earlier usda rejected bids dlrs varieties	0	0	0	4	5	3	1	0	9	10	4	2	2	6	5	12	12	14	12
rio grande mt hss dlrs basis ports spanish med mt hss dlrs basis days purposes usg taiwan mt hss usg option seaforth tons hss days purposes ports italian mt bulk wheat st lawrence ports range mt bulk wheat mt bulk bagged red sea mt bulk barley usg mt wheat grades days	1	rio grande mt hss dlrs basis ports spanish med mt hss dlrs basis days purposes usg taiwan mt hss usg option seaforth tons hss days purposes ports italian mt bulk wheat st lawrence ports range mt bulk wheat mt bulk bagged red sea mt bulk barley usg mt wheat grades days	0	0	0	4	5	3	7	7	9	10	4	2	2	6	5	12	6	14	12
issuing centre swiss regional banks launching bond issues mln mln swiss francs mln franc issue coupon pct issue price pct mln franc issue coupon pct issue price pct subscriptions close march funds partly repay mln franc bond maturing april	1	issuing centre swiss regional banks launching bond issues mln mln swiss francs mln franc issue coupon pct issue price pct mln franc issue coupon pct issue price pct subscriptions close march funds partly repay mln franc bond maturing april	0	2	1	2	0	0	5	6	2	7	0	8	9	11	11	6	13	13	8
kansas city board trade federal futures regulators modify proposal raise chicago board cbt speculative position limits wheat futures contracts plan kansas exchange competitive disadvantage commodity futures trading commission cftc month proposed raising cbt wheat speculative limits contracts months net contracts contracts single month contracts time cftc proposed leaving wheat speculative positio…	1	kansas city board trade federal futures regulators modify proposal raise chicago board cbt speculative position limits wheat futures contracts plan kansas exchange competitive disadvantage commodity futures trading commission cftc month proposed raising cbt wheat speculative limits contracts months net contracts contracts single month contracts time cftc proposed leaving wheat speculative positio…	0	0	0	4	5	3	7	7	5	8	7	3	3	3	3	12	4	10	12
corn sales tonnes week march level mid november agriculture department department ussr dominated activity purchases mln tonnes earlier reported daily reporting system posted japan unknown destinations taiwan purchased tonnes season tonnes season wheat sales tonnes current season tonnes season preceding week week average wheat sales china tonnes switched season soybean sales tonnes pct prior week …	1	corn sales tonnes week march level mid november agriculture department department ussr dominated activity purchases mln tonnes earlier reported daily reporting system posted japan unknown destinations taiwan purchased tonnes season tonnes season wheat sales tonnes current season tonnes season preceding week week average wheat sales china tonnes switched season soybean sales tonnes pct prior week …	0	0	0	0	1	3	1	0	1	2	8	6	6	7	9	4	9	0	6
directors american farm bureau largest farm organization voted tuesday urge congress leave farm bill opposed farm bill dean president current farm bill judgment gained time maintaining legislation independent studies farm bill balance alternatives advanced farm bureau urged agriculture secretary richard lyng adjust loan rate crop soybeans farm bill soybeans competitive market farm bureau proposal…	1	directors american farm bureau largest farm organization voted tuesday urge congress leave farm bill opposed farm bill dean president current farm bill judgment gained time maintaining legislation independent studies farm bill balance alternatives advanced farm bureau urged agriculture secretary richard lyng adjust loan rate crop soybeans farm bill soybeans competitive market farm bureau proposal…	1	1	3	4	5	4	7	7	5	8	7	3	3	3	3	2	2	2	13
agriculture undersecretary daniel amstutz wheat supply demand situation bullish developments market increased consumption speaking house agriculture appropriations subcommittee amstutz cited factors improved wheat outlook consumption wheat increasing mln tonnes feed reports australia canada argentina plantings reduced cited reports normal winterkill soviet union reasonable expect production consu…	1	agriculture undersecretary daniel amstutz wheat supply demand situation bullish developments market increased consumption speaking house agriculture appropriations subcommittee amstutz cited factors improved wheat outlook consumption wheat increasing mln tonnes feed reports australia canada argentina plantings reduced cited reports normal winterkill soviet union reasonable expect production consu…	0	0	0	4	5	3	7	7	5	8	7	3	3	3	3	2	4	10	2
french domestic bond issuing committee approved issues totalling billion francs credit lead manage billion franc issue caisse centrale de credit banque francaise de lead union de de placement mln franc issue account caisse centrale des lead mln issue des industries le details	1	french domestic bond issuing committee approved issues totalling billion francs credit lead manage billion franc issue caisse centrale de credit banque francaise de lead union de de placement mln franc issue account caisse centrale des lead mln issue des industries le details	1	1	1	2	0	2	4	3	6	0	5	5	4	9	7	3	14	16	0
soviet union tonnes corn previous commitments delivery fourth ussr grain supply agreement october agriculture department export sales report covering transactions week april corn transactions consisted tonnes sales destinations tonnes total corn commitments ussr delivery fourth agreement amount tonnes soviets purchased wheat soybeans fourth agreement	1	soviet union tonnes corn previous commitments delivery fourth ussr grain supply agreement october agriculture department export sales report covering transactions week april corn transactions consisted tonnes sales destinations tonnes total corn commitments ussr delivery fourth agreement amount tonnes soviets purchased wheat soybeans fourth agreement	0	0	0	0	1	3	1	0	1	2	8	6	6	7	9	4	9	0	6
joint committee maize importers tender april cargoes maize totalling tonnes delivery june committee spokesman told reuters taiwan set calendar import target mln tonnes compared imports mln pct imports expected rest south africa spokesman	1	joint committee maize importers tender april cargoes maize totalling tonnes delivery june committee spokesman told reuters taiwan set calendar import target mln tonnes compared imports mln pct imports expected rest south africa spokesman	0	0	0	0	1	3	1	0	1	2	8	6	6	7	9	4	9	0	12
highly favorable trial bread lbs wheat flour february ready delivery tranche tonnes mixed wheat agriculture department report export markets grain department senegal bought tonnes wheat export enhancement program november local opposition french wheat delaying deliveries result series baking trial effort satisfy local flour convince key officials qualities wheat department deliveries wheat senega…	1	highly favorable trial bread lbs wheat flour february ready delivery tranche tonnes mixed wheat agriculture department report export markets grain department senegal bought tonnes wheat export enhancement program november local opposition french wheat delaying deliveries result series baking trial effort satisfy local flour convince key officials qualities wheat department deliveries wheat senega…	0	0	0	4	5	3	1	0	1	2	4	6	2	7	9	12	9	0	12
bank provide mln dlrs tanzania international development association lending affiliate tanzania mln dlr loan telecommunications network bank mln dlr loan finance tropical forest conservation projects program bank credit including grace carries bank	1	bank provide mln dlrs tanzania international development association lending affiliate tanzania mln dlr loan telecommunications network bank mln dlr loan finance tropical forest conservation projects program bank credit including grace carries bank	0	2	1	2	0	0	5	6	2	7	0	0	0	0	0	14	6	9	7
french cereals intervention board onic left estimate french july june soft wheat deliveries unchanged forecast mln tonnes compared deliveries mln tonnes august july estimated maize deliveries left unchanged previous forecast february mln tonnes mln previous season barley deliveries unchanged mln tonnes mln	1	french cereals intervention board onic left estimate french july june soft wheat deliveries unchanged forecast mln tonnes compared deliveries mln tonnes august july estimated maize deliveries left unchanged previous forecast february mln tonnes mln previous season barley deliveries unchanged mln tonnes mln	0	0	0	0	1	3	1	0	1	2	8	6	6	7	9	4	9	0	12
egypt cancelled april tender tonnes origin wheat april shipment trade egyptian official sources trade sources cancellation offer egyptian company islamic corp dlrs tonne cost freight offers dlrs tonne egyptian trade official paris confirmed cancellation tender islamic corp offer government refused legal reasons official denied trade reports government private deal islamic corp original tender	1	egypt cancelled april tender tonnes origin wheat april shipment trade egyptian official sources trade sources cancellation offer egyptian company islamic corp dlrs tonne cost freight offers dlrs tonne egyptian trade official paris confirmed cancellation tender islamic corp offer government refused legal reasons official denied trade reports government private deal islamic corp original tender	1	1	3	1	2	3	1	0	0	1	2	11	10	8	2	1	16	1	12
japanese real estate company launch campaign sell land farming rich japanese nippon house offer acres land illinois california florida indiana april gauge response set international farm corp america chicago september operation american farmers continue profits harvests rice corn soybean oranges japanese investors rental japanese agriculture ministry officials told reuters sales limited farmers l…	1	japanese real estate company launch campaign sell land farming rich japanese nippon house offer acres land illinois california florida indiana april gauge response set international farm corp america chicago september operation american farmers continue profits harvests rice corn soybean oranges japanese investors rental japanese agriculture ministry officials told reuters sales limited farmers l…	1	1	3	4	5	4	7	7	5	8	10	10	8	13	13	5	8	17	4
tons usg taiwan dlrs days continental trade banner tons grain usg morocco dlrs april reference york grain april ship brokers vessel fixed lakes algeria dlrs reported wave reference york grain april grain maize business east london dlrs japan spain reported	1	tons usg taiwan dlrs days continental trade banner tons grain usg morocco dlrs april reference york grain april ship brokers vessel fixed lakes algeria dlrs reported wave reference york grain april grain maize business east london dlrs japan spain reported	0	0	0	4	5	3	7	7	5	8	7	3	3	13	13	11	6	11	11
honduras tender april public law tonnes bulk agent country agent honduras seeking northern spring pct protein minimum pct moisture maximum hard red winter pct protein minimum pct moisture maximum agent laydays july tonnes aug tonnes sept tonnes laydays june tonnes july tonnes september tonnes offers hrs edt april remain valid hrs edt april agent	1	honduras tender april public law tonnes bulk agent country agent honduras seeking northern spring pct protein minimum pct moisture maximum hard red winter pct protein minimum pct moisture maximum agent laydays july tonnes aug tonnes sept tonnes laydays june tonnes july tonnes september tonnes offers hrs edt april remain valid hrs edt april agent	0	0	0	0	1	3	1	0	1	2	8	6	6	7	9	4	9	0	6
total food aid developed countries declined fell countries africa middle east asia agriculture department summary agriculture report department grain production saharan africa record gains country food central america rose worsened drought reduced crops civil record wheat production pushing global wheat consumption food yielding varieties effective spring wheat common crop developing countries tr…	1	total food aid developed countries declined fell countries africa middle east asia agriculture department summary agriculture report department grain production saharan africa record gains country food central america rose worsened drought reduced crops civil record wheat production pushing global wheat consumption food yielding varieties effective spring wheat common crop developing countries tr…	0	0	0	4	5	3	7	7	7	4	9	7	1	1	3	11	1	11	11
united signed public law agreement honduras provide sale mln dlrs worth agricultural commodities agriculture department agreement signed march sale tonnes wheat wheat flour worth mln dlrs tonnes corn sorghum worth mln dlrs tonnes tallow worth mln dlrs department commodities supplied current fiscal september sales private traders competitive bid basis purchase announced issued	1	united signed public law agreement honduras provide sale mln dlrs worth agricultural commodities agriculture department agreement signed march sale tonnes wheat wheat flour worth mln dlrs tonnes corn sorghum worth mln dlrs tonnes tallow worth mln dlrs department commodities supplied current fiscal september sales private traders competitive bid basis purchase announced issued	0	0	0	0	1	3	1	0	9	10	4	2	2	6	5	12	6	9	6
agriculture secretary richard lyng japan farm market washington cut trade deficit ease protectionist pressures agriculture ministry official told reporters maki director economic affairs bureau quoted lyng telling agriculture minister mutsuki kato removal import restrictions japan united meeting kato day visit japan lyng farm trade maki quoted kato japan largest grain importer kato japan largest …	1	agriculture secretary richard lyng japan farm market washington cut trade deficit ease protectionist pressures agriculture ministry official told reporters maki director economic affairs bureau quoted lyng telling agriculture minister mutsuki kato removal import restrictions japan united meeting kato day visit japan lyng farm trade maki quoted kato japan largest grain importer kato japan largest …	1	1	3	1	2	4	3	1	0	1	10	10	8	13	13	5	8	17	4
commodity credit corporation ccc accepted bid export bonus cover sale tonnes barley cyprus agriculture department barley shipment bonus dlrs tonne harvest cooperatives department bonus paid form commodities inventory ccc stocks department additional tonnes barley cyprus export enhancement program initiative announced august	1	commodity credit corporation ccc accepted bid export bonus cover sale tonnes barley cyprus agriculture department barley shipment bonus dlrs tonne harvest cooperatives department bonus paid form commodities inventory ccc stocks department additional tonnes barley cyprus export enhancement program initiative announced august	0	0	0	4	5	3	1	7	9	10	4	2	2	6	5	12	12	14	15
commodity credit corporation accepted bid export bonus cover sale tonnes wheat flour iraq agriculture department bonus awarded dlrs tonne paid peavey company form commodities ccc stocks wheat flour delivery june department additional tonnes wheat flour iraq export enhancement program initiative announced january usda	1	commodity credit corporation accepted bid export bonus cover sale tonnes wheat flour iraq agriculture department bonus awarded dlrs tonne paid peavey company form commodities ccc stocks wheat flour delivery june department additional tonnes wheat flour iraq export enhancement program initiative announced january usda	0	0	0	4	5	3	7	7	9	10	4	2	2	6	5	12	12	14	15
portuguese court preliminary ruling grain buying agency epac allowed public import tenders private importers grain traders officials terms january accession european community ec grain import monopoly held epac de de reduced pct annually imports liberalised private traders epac permitted tenders liberalised pct share annual import grain oilseed importers association legal proceedings epac partici…	1	portuguese court preliminary ruling grain buying agency epac allowed public import tenders private importers grain traders officials terms january accession european community ec grain import monopoly held epac de de reduced pct annually imports liberalised private traders epac permitted tenders liberalised pct share annual import grain oilseed importers association legal proceedings epac partici…	1	0	3	1	2	3	3	8	3	6	3	1	11	4	14	9	11	6	14
grain traders analysts expect lower wheat soybean exports corn exports ago export inspection report corn export guesses ranged mln mln bushels compared mln inspected week mln ago soybean export guesses ranged mln mln mln inspected week mln reported ago wheat estimates ranged mln mln bushels compared mln reported week mln ago	1	grain traders analysts expect lower wheat soybean exports corn exports ago export inspection report corn export guesses ranged mln mln bushels compared mln inspected week mln ago soybean export guesses ranged mln mln mln inspected week mln reported ago wheat estimates ranged mln mln bushels compared mln reported week mln ago	0	0	0	0	1	0	5	6	2	7	0	0	0	0	0	0	0	9	7
honduras authorized buy tonnes wheat tonnes corn tonnes tallow existing pl agreement agriculture department department buy wheat valued mln dlrs corn valued mln tallow valued mln dlrs march august ship ports canadian september purchase cover entire quantity provided agreement signed march	1	honduras authorized buy tonnes wheat tonnes corn tonnes tallow existing pl agreement agriculture department department buy wheat valued mln dlrs corn valued mln tallow valued mln dlrs march august ship ports canadian september purchase cover entire quantity provided agreement signed march	0	0	0	0	1	3	1	0	1	2	8	6	6	7	9	4	9	0	6
sichuan government meeting fight drought cancelled postponed save time energy manpower daily domestic edition sichuan provinces threatened drought hong kong daily drought worst mln hectares counties sichuan biggest agricultural producer sichuan experienced temperatures degrees centigrade normal rainfall pct normal february wheat oil bearing crops rice planting cash crops paper hectares county gua…	1	sichuan government meeting fight drought cancelled postponed save time energy manpower daily domestic edition sichuan provinces threatened drought hong kong daily drought worst mln hectares counties sichuan biggest agricultural producer sichuan experienced temperatures degrees centigrade normal rainfall pct normal february wheat oil bearing crops rice planting cash crops paper hectares county gua…	0	0	0	0	1	0	5	6	5	8	7	8	9	11	11	11	13	11	11
warm dry weather china crops china news agency drought rice planting difficult provinces including sichuan plant diseases insect pests increased wheat producing agency provinces suffering drought months agency dry weather reduced amount water stored pct compared march lowered water level rivers reduced power supplies caused water shortages industry consumers upper reaches lowest levels century ca…	1	warm dry weather china crops china news agency drought rice planting difficult provinces including sichuan plant diseases insect pests increased wheat producing agency provinces suffering drought months agency dry weather reduced amount water stored pct compared march lowered water level rivers reduced power supplies caused water shortages industry consumers upper reaches lowest levels century ca…	0	0	0	4	5	3	7	7	5	8	7	8	9	11	11	11	13	11	11
china expects grain harvest mln tonnes mln tonnes short target china news agency quoted statistical bureau spokesman harvest history poor weather low incentives grain producing farmers yields earlier chinese press reports industry sources expect china import mln tonnes grain harvest shortfall chinese customs figures grain imports mln tonnes months compared mln period agriculture minister month pr…	1	china expects grain harvest mln tonnes mln tonnes short target china news agency quoted statistical bureau spokesman harvest history poor weather low incentives grain producing farmers yields earlier chinese press reports industry sources expect china import mln tonnes grain harvest shortfall chinese customs figures grain imports mln tonnes months compared mln period agriculture minister month pr…	0	0	0	0	1	3	1	0	1	2	8	6	6	7	9	4	9	11	11
house agriculture committee voted billion dlrs feedgrains deficiency payments late fall measure defeated senate floor week bill passed voice vote called payments late payments feedgrains crops changed bill move billion dlrs spending fiscal fiscal measure expected meet stiff resistance house	1	house agriculture committee voted billion dlrs feedgrains deficiency payments late fall measure defeated senate floor week bill passed voice vote called payments late payments feedgrains crops changed bill move billion dlrs spending fiscal fiscal measure expected meet stiff resistance house	1	1	1	2	0	2	7	7	5	8	5	5	4	9	7	3	2	2	13
boeing national space administration selected boeing operate mission services marshall space flight center boeing provide engineers scientists management personnel equipment materials services aid operations projects space proposed space station provide program management support mission support systems engineering computer systems services applications software hardware maintenance boeing cost a…	1	boeing national space administration selected boeing operate mission services marshall space flight center boeing provide engineers scientists management personnel equipment materials services aid operations projects space proposed space station provide program management support mission support systems engineering computer systems services applications software hardware maintenance boeing cost a…	0	2	2	3	5	6	2	2	7	4	9	7	1	1	8	10	6	12	1
american express plan sell stake shearson lehman brothers believed prelude public offering shares brokerage unit analysts american express earlier understanding nippon life insurance japan sell pct shearson mln dlrs statement triggered rise brokerage stocks investors speculated possibility investment brokerage industry japanese concerns stocks brokerage firms climbed response nippon stake firm an…	1	american express plan sell stake shearson lehman brothers believed prelude public offering shares brokerage unit analysts american express earlier understanding nippon life insurance japan sell pct shearson mln dlrs statement triggered rise brokerage stocks investors speculated possibility investment brokerage industry japanese concerns stocks brokerage firms climbed response nippon stake firm an…	1	1	3	1	2	6	2	2	7	4	10	8	9	11	8	10	8	12	8
commodity credit corporation ccc accepted bonus offers exporters sales tonnes hard red winter tonnes soft red winter wheat jordan agriculture department department bonuses awarded averaged dlrs tonne wheat delivery november bonus awards louis dreyfus corp tonnes continental grain tonnes paid form commodities ccc stocks purchases wheat completes export enhancement program initiative announced dece…	1	commodity credit corporation ccc accepted bonus offers exporters sales tonnes hard red winter tonnes soft red winter wheat jordan agriculture department department bonuses awarded averaged dlrs tonne wheat delivery november bonus awards louis dreyfus corp tonnes continental grain tonnes paid form commodities ccc stocks purchases wheat completes export enhancement program initiative announced dece…	0	0	0	4	5	3	1	0	9	10	4	2	2	6	5	12	12	14	15
ivory coast maize output risen steadily decades country aims produce mln tonnes annually rapidly official daily fraternite matin reported country reached sufficiency maize ago harvested record tonnes compared tonnes earlier daily detail output production increases anticipated ahead policy boosting domestic output cut grain imports	1	ivory coast maize output risen steadily decades country aims produce mln tonnes annually rapidly official daily fraternite matin reported country reached sufficiency maize ago harvested record tonnes compared tonnes earlier daily detail output production increases anticipated ahead policy boosting domestic output cut grain imports	0	0	0	0	1	3	1	0	1	2	8	6	6	7	9	4	9	0	6
agriculture department reported farmer owned reserve national day average price february dlrs bu sorghum cwt loan release call rate level price price wheat iv vi corn iv rates loan release call rate level price price oats barley iv sorghum iv reserves ii iii level iv reflects grain entered oct feedgrain july wheat level wheat barley corn sorghum level vi covers wheat entered january rates dlrs cw…	1	agriculture department reported farmer owned reserve national day average price february dlrs bu sorghum cwt loan release call rate level price price wheat iv vi corn iv rates loan release call rate level price price oats barley iv sorghum iv reserves ii iii level iv reflects grain entered oct feedgrain july wheat level wheat barley corn sorghum level vi covers wheat entered january rates dlrs cw…	0	0	0	4	5	3	7	7	5	8	7	3	3	2	12	2	17	15	3
senate finance committee approved urging reagan administration oppose ruling corn imports proposed european community tax vegetable oils approved voice vote senate floor expected approved ec oils measure offered sen john danforth mo urges administration strong retaliatory measures tax approved ec council ministers sen david minn offered corn amendment urges administration file complaint gatt beli…	1	senate finance committee approved urging reagan administration oppose ruling corn imports proposed european community tax vegetable oils approved voice vote senate floor expected approved ec oils measure offered sen john danforth mo urges administration strong retaliatory measures tax approved ec council ministers sen david minn offered corn amendment urges administration file complaint gatt beli…	1	1	3	4	5	4	7	8	3	6	3	1	11	2	12	2	17	15	14
agriculture department increased estimate grain purchases soviet union mln tonnes mln tonnes month monthly report soviet grain situation usda imports earlier estimated soviet grain buyers actively purchasing month usda increased purchasing surprising soviet crop estimates increase estimated imports corn usda mln tonnes total mln tonnes wheat mln tonnes coarse grains remaining mln tonnes grains us…	1	agriculture department increased estimate grain purchases soviet union mln tonnes mln tonnes month monthly report soviet grain situation usda imports earlier estimated soviet grain buyers actively purchasing month usda increased purchasing surprising soviet crop estimates increase estimated imports corn usda mln tonnes total mln tonnes wheat mln tonnes coarse grains remaining mln tonnes grains us…	0	0	0	0	1	3	1	0	1	2	8	6	6	7	9	4	9	0	6
swiss lawyers headed attempt restrict banking secrecy curb powers clients revised code banking conduct agreed association week analysts drug insider dealing money controversy accounts ousted philippine haitian hurt standing swiss banks strained international relations united critics code fell short demands reform close key loophole requirement banks identity customers social democratic party ruli…	1	swiss lawyers headed attempt restrict banking secrecy curb powers clients revised code banking conduct agreed association week analysts drug insider dealing money controversy accounts ousted philippine haitian hurt standing swiss banks strained international relations united critics code fell short demands reform close key loophole requirement banks identity customers social democratic party ruli…	1	1	3	1	2	4	3	1	0	1	2	8	9	11	11	14	6	12	17
cash grain dealers reported slow country movement corn soybeans midwest corn sales pik roll activity earlier week drying dealers usda adjust posted county price gulf account barge freight rates corn sales flowing current plan weeks hoped corn soybean basis values continued drop illinois river strong barge freight rates toledo chicago elevators loading corn boats shipping season supporting spot ba…	1	cash grain dealers reported slow country movement corn soybeans midwest corn sales pik roll activity earlier week drying dealers usda adjust posted county price gulf account barge freight rates corn sales flowing current plan weeks hoped corn soybean basis values continued drop illinois river strong barge freight rates toledo chicago elevators loading corn boats shipping season supporting spot ba…	0	0	0	4	5	3	7	7	5	8	7	3	3	2	12	2	17	15	3
missouri republican senators john danforth christopher bond introduced bill wheat feedgrain producers mississippi missouri rivers hurt flooding collect pct deficiency payments planting danforth aide bill provision included house agriculture committee passed emergency disaster assistance bill scheduled house tomorrow flooding destroyed rivers october leaving farmland vulnerable damage	1	missouri republican senators john danforth christopher bond introduced bill wheat feedgrain producers mississippi missouri rivers hurt flooding collect pct deficiency payments planting danforth aide bill provision included house agriculture committee passed emergency disaster assistance bill scheduled house tomorrow flooding destroyed rivers october leaving farmland vulnerable damage	1	1	3	4	5	4	7	7	5	8	7	3	3	8	3	1	2	2	13
joint committee maize importers awarded contracts companies shipments totalling tonnes maize delivery september december committee official united grain corp oregon won contracts supply tonnes priced dlrs tonne september november delivery cargill minnesota shipments totalling tonnes priced dlrs tonne october december delivery adm export minnesota received tonne cargo dlrs tonne november delivery …	1	joint committee maize importers awarded contracts companies shipments totalling tonnes maize delivery september december committee official united grain corp oregon won contracts supply tonnes priced dlrs tonne september november delivery cargill minnesota shipments totalling tonnes priced dlrs tonne october december delivery adm export minnesota received tonne cargo dlrs tonne november delivery …	0	0	0	0	1	3	1	0	1	2	8	6	6	7	9	4	9	0	12
european community ec leaders hope attempt inject fresh urgency talks reforming controversial farm policy ec agriculture ministers meet day discussions morning community officials farm commissioner frans andriessen met belgian minister paul de keersmaeker late night plan initiative andriessen de keersmaeker ec farm meetings disappointed lack progress talks week executive commission proposed tough…	1	european community ec leaders hope attempt inject fresh urgency talks reforming controversial farm policy ec agriculture ministers meet day discussions morning community officials farm commissioner frans andriessen met belgian minister paul de keersmaeker late night plan initiative andriessen de keersmaeker ec farm meetings disappointed lack progress talks week executive commission proposed tough…	1	1	3	1	2	4	3	8	3	6	3	1	11	4	14	9	11	6	14
commodity credit corporation ccc authorized mln dlrs credit guarantees sales rice algeria fiscal export credit guarantee program gsm agriculture department additional guarantees increase cumulative fiscal program sales agricultural products algeria mln dlrs eligible credit guarantee coverage sales registered exported september department aid	1	commodity credit corporation ccc authorized mln dlrs credit guarantees sales rice algeria fiscal export credit guarantee program gsm agriculture department additional guarantees increase cumulative fiscal program sales agricultural products algeria mln dlrs eligible credit guarantee coverage sales registered exported september department aid	0	0	0	4	5	3	7	7	9	10	4	2	2	6	5	12	12	14	15
shareholders illinois cooperative futures futures trading arm midwest farm cooperatives vote wednesday dissolution directors company called special meeting recommended dissolution month citing falling volume increasing costs sources close organization told reuters growmark holds pct capital stock led call dissolution cooperative set clearing houses trading business regional local cooperatives com…	1	shareholders illinois cooperative futures futures trading arm midwest farm cooperatives vote wednesday dissolution directors company called special meeting recommended dissolution month citing falling volume increasing costs sources close organization told reuters growmark holds pct capital stock led call dissolution cooperative set clearing houses trading business regional local cooperatives com…	0	1	3	4	5	0	7	7	5	8	7	3	3	2	12	2	6	12	3
pakistani government allowed private sector export cotton rice trade policy announced cover commerce planning minister televised speech decided duty free import cotton yarn cotton rice main exports handled exclusively corporations private sector export cotton rice corporations duty free import cotton yarn allowed quality yarn local industries enable compete effectively market overcome domestic sh…	1	pakistani government allowed private sector export cotton rice trade policy announced cover commerce planning minister televised speech decided duty free import cotton yarn cotton rice main exports handled exclusively corporations private sector export cotton rice corporations duty free import cotton yarn allowed quality yarn local industries enable compete effectively market overcome domestic sh…	1	1	3	1	2	4	7	7	5	8	2	11	10	8	2	11	16	11	16
tunisia bought tonnes french soft wheat august december shipment dlrs tonne fob export credit trade sources french soft wheat export sale season starts july brazilian purchase tonnes france sold tonnes soft wheat tunisia season	1	tunisia bought tonnes french soft wheat august december shipment dlrs tonne fob export credit trade sources french soft wheat export sale season starts july brazilian purchase tonnes france sold tonnes soft wheat tunisia season	0	0	0	0	1	3	1	0	1	2	8	6	6	7	9	4	9	0	12
house representatives approved bill enable winter wheat feedgrains farmers hit midwestern flooding receive pct federal income support payments plant time pilot program designed assist farmers kansas oklahoma michigan missouri passed vote senate bill includes narrow version provision endorsed reagan administration agriculture department withheld support measure usda bill discourage farmers buying …	1	house representatives approved bill enable winter wheat feedgrains farmers hit midwestern flooding receive pct federal income support payments plant time pilot program designed assist farmers kansas oklahoma michigan missouri passed vote senate bill includes narrow version provision endorsed reagan administration agriculture department withheld support measure usda bill discourage farmers buying …	0	0	0	4	5	0	7	7	5	8	7	3	3	2	3	2	2	2	13
polish farmers receive price rises ranging pct crops pct meat july finance agriculture ministries procurement price rape rise pct wheat average pct pork rise pct beef pct ministries prices aimed ensure profits meet living costs time fertilisers rise average pct animal pct pct	1	polish farmers receive price rises ranging pct crops pct meat july finance agriculture ministries procurement price rape rise pct wheat average pct pork rise pct beef pct ministries prices aimed ensure profits meet living costs time fertilisers rise average pct animal pct pct	0	2	2	4	5	6	2	2	5	8	7	8	9	11	11	6	13	13	8
agricultural stabilization conservation service ascs established unit values commodities offered government stocks redemption commodity credit corporation commodity certificates effective business day price bushel dollars sorghum priced cwt corn yellow grade wheat hrs srw durum chicago ill track toledo memphis denver cincinnati minneapolis baltimore phil kansas city st louis lubbock hrs srw durum…	1	agricultural stabilization conservation service ascs established unit values commodities offered government stocks redemption commodity credit corporation commodity certificates effective business day price bushel dollars sorghum priced cwt corn yellow grade wheat hrs srw durum chicago ill track toledo memphis denver cincinnati minneapolis baltimore phil kansas city st louis lubbock hrs srw durum…	0	0	0	4	5	3	7	7	5	9	11	9	12	2	12	15	17	15	3
grain analysts surveyed american soybean association asa projected acreage mln acres soybeans mln acres corn farmers planted mln acres soybeans mln acres corn february usda supply demand report usda release planting intentions report march survey included soybean estimates corn estimates released march soybean update newsletter estimates ranged mln mln acres soybeans mln mln acres corn asa spokes…	1	grain analysts surveyed american soybean association asa projected acreage mln acres soybeans mln acres corn farmers planted mln acres soybeans mln acres corn february usda supply demand report usda release planting intentions report march survey included soybean estimates corn estimates released march soybean update newsletter estimates ranged mln mln acres soybeans mln mln acres corn asa spokes…	0	0	0	4	5	0	5	6	5	8	7	3	3	2	12	2	17	15	3
commodity credit corporation ccc reallocated mln dlrs credit guarantees earmarked sales wheat provide coverage sales vegetable oil bangladesh agriculture department usda action request bangladesh government reduces guarantee authorized wheat sales mln dlrs mln dlrs vegetable oils eligible coverage intermediate export credit program credit terms excess sales covered credit guarantees registered sh…	1	commodity credit corporation ccc reallocated mln dlrs credit guarantees earmarked sales wheat provide coverage sales vegetable oil bangladesh agriculture department usda action request bangladesh government reduces guarantee authorized wheat sales mln dlrs mln dlrs vegetable oils eligible coverage intermediate export credit program credit terms excess sales covered credit guarantees registered sh…	0	0	0	4	5	3	7	7	9	10	4	2	2	6	5	12	12	14	15
grain imports rise drought increasing demand chinese officials japanese traders told reuters foreign exchange constraints national policy return scale imports peaked mln tonnes agricultural official shanghai government maximum imports mln tonnes mln mln officials grain imports rose poor harvest rising domestic demand remained exports rose mln tonnes mln china short foreign exchange shanghai offic…	1	grain imports rise drought increasing demand chinese officials japanese traders told reuters foreign exchange constraints national policy return scale imports peaked mln tonnes agricultural official shanghai government maximum imports mln tonnes mln mln officials grain imports rose poor harvest rising domestic demand remained exports rose mln tonnes mln china short foreign exchange shanghai offic…	0	0	0	0	1	0	5	6	5	8	7	3	3	0	0	11	0	11	11
dome petroleum pct stake gold producer dome mines continues sale price spokesman david annesley response inquiry remarks chairman howard annesley company selling stake dome mines dome pct stake lt encor energy corp annesley encor strategic investment dome intention selling dome spokesman annesley answer question aware negotiations sale dome mln dome mines shares declined price company selling sha…	1	dome petroleum pct stake gold producer dome mines continues sale price spokesman david annesley response inquiry remarks chairman howard annesley company selling stake dome mines dome pct stake lt encor energy corp annesley encor strategic investment dome intention selling dome spokesman annesley answer question aware negotiations sale dome mln dome mines shares declined price company selling sha…	0	2	2	3	4	6	2	2	7	4	9	7	9	11	8	10	6	12	8
french operators friday requested licences export tonnes free market maize tonnes free market barley soft wheat flour ec countries daily rebates french trade sources requests maize export switzerland austria maximum daily rebate friday ecus tonne previous ecu daily rebate special daily rebate maize set context commission commitment grant season rebates export tonnes french maize ec countries comp…	1	french operators friday requested licences export tonnes free market maize tonnes free market barley soft wheat flour ec countries daily rebates french trade sources requests maize export switzerland austria maximum daily rebate friday ecus tonne previous ecu daily rebate special daily rebate maize set context commission commitment grant season rebates export tonnes french maize ec countries comp…	0	0	0	0	1	3	1	0	1	2	3	1	11	4	14	9	9	0	12
agriculture secretary richard lyng told representatives largest grain exporting firms farm organizations position comment request reagan administration offer subsidized wheat soviet union participants meeting lyng simply told position talk eep export enhancement program initiative soviet union hofer vice president national council farmer cooperatives meeting identified lyng request participants m…	1	agriculture secretary richard lyng told representatives largest grain exporting firms farm organizations position comment request reagan administration offer subsidized wheat soviet union participants meeting lyng simply told position talk eep export enhancement program initiative soviet union hofer vice president national council farmer cooperatives meeting identified lyng request participants m…	1	0	0	4	5	3	7	7	5	8	7	3	3	3	3	2	4	10	2
american savings bank issuing billion yen eurobond april paying pct priced pct lead manager nikko securities europe issue pct government federal securities cash aim aaa listing nikko official issue denominations mln yen listed luxembourg payment april selling concession pct management underwriting combined pays pct	1	american savings bank issuing billion yen eurobond april paying pct priced pct lead manager nikko securities europe issue pct government federal securities cash aim aaa listing nikko official issue denominations mln yen listed luxembourg payment april selling concession pct management underwriting combined pays pct	0	1	1	2	0	0	5	6	2	7	5	8	9	11	11	6	13	13	8
agriculture department forecast soviet wheat crop mln tonnes mln tonnes month crop mln tonnes mln tonnes month soviet coarse grain production estimated mln tonnes mln tonnes month production projected mln tonnes mln tonnes month ussr wheat imports forecast mln tonnes mln tonnes month imports mln tonnes mln tonnes month usda estimated soviet coarse grain imports mln tonnes mln tonnes month imports…	1	agriculture department forecast soviet wheat crop mln tonnes mln tonnes month crop mln tonnes mln tonnes month soviet coarse grain production estimated mln tonnes mln tonnes month production projected mln tonnes mln tonnes month ussr wheat imports forecast mln tonnes mln tonnes month imports mln tonnes mln tonnes month usda estimated soviet coarse grain imports mln tonnes mln tonnes month imports…	0	0	0	0	1	3	1	0	1	2	8	6	6	7	9	4	9	0	6
failure bangladesh government tackle current food crisis lead leader bangladesh party told press conference yesterday prices rice rose pct country march government begun emergency rice wheat sales lower cereal prices food ministry report ministry officials harvest mid april ease situation temporary grain shortage north rain regions unusual time official practices food officials failure grains con…	1	failure bangladesh government tackle current food crisis lead leader bangladesh party told press conference yesterday prices rice rose pct country march government begun emergency rice wheat sales lower cereal prices food ministry report ministry officials harvest mid april ease situation temporary grain shortage north rain regions unusual time official practices food officials failure grains con…	0	0	0	0	1	3	1	0	1	2	8	6	6	7	9	4	9	0	6
soviet union honor commitment united buy minimum mln tonnes corn agriculture department official agreement reason told reuters aggressive buying campaign european community canada active buyers sources official explaining department raised soviet grain imports estimate mln tonnes mln tonnes dramatic shift months ago analysts ussr buy corn time drawdown corn supplies china argentina concern soviet…	1	soviet union honor commitment united buy minimum mln tonnes corn agriculture department official agreement reason told reuters aggressive buying campaign european community canada active buyers sources official explaining department raised soviet grain imports estimate mln tonnes mln tonnes dramatic shift months ago analysts ussr buy corn time drawdown corn supplies china argentina concern soviet…	0	0	0	4	5	3	7	7	5	8	7	3	3	3	3	2	4	10	2
agricultural stabilization conservation service ascs bought mln pounds wheat flour cost mln dlrs domestic shipment april april ascs spokesman ascs bought mln pounds flour mln dlrs mln pounds pasta dlrs mln pounds processed cereal products dlrs mln pounds corn products dlrs mln pounds milled rice mln dlrs	1	agricultural stabilization conservation service ascs bought mln pounds wheat flour cost mln dlrs domestic shipment april april ascs spokesman ascs bought mln pounds flour mln dlrs mln pounds pasta dlrs mln pounds processed cereal products dlrs mln pounds corn products dlrs mln pounds milled rice mln dlrs	0	0	0	0	1	0	5	6	2	7	0	0	0	0	0	0	6	9	7
ten grain ships loading waiting load orleans elevators trade sources elevator loading waiting continental grain mississippi river adm growmark grain elevator loading waiting st charles reserve elevator corp peavey st cargill grain cargill grain port allen	1	ten grain ships loading waiting load orleans elevators trade sources elevator loading waiting continental grain mississippi river adm growmark grain elevator loading waiting st charles reserve elevator corp peavey st cargill grain cargill grain port allen	0	0	0	4	5	3	7	7	5	8	7	3	3	3	3	11	4	11	11
plan feedgrains delay offering proposals disaster aid bill house agriculture committee winter wheat congressional sources disaster aid bill introduced rep glenn english okla sparked sharp controversy proposals implement program wheat winter wheat agreement reached trim bill wheat supporters feedgrains plan version equitable farmers english bill winter wheat simple disaster payment feedgrains trea…	1	plan feedgrains delay offering proposals disaster aid bill house agriculture committee winter wheat congressional sources disaster aid bill introduced rep glenn english okla sparked sharp controversy proposals implement program wheat winter wheat agreement reached trim bill wheat supporters feedgrains plan version equitable farmers english bill winter wheat simple disaster payment feedgrains trea…	0	0	0	4	5	3	7	7	5	8	7	3	3	3	3	2	2	2	13
maize import commitments expected rise tonnes months tonnes earlier spokesman joint committee maize importers told reuters pct imports rest south africa maize import target calendar set mln tonnes compared actual mln	1	maize import commitments expected rise tonnes months tonnes earlier spokesman joint committee maize importers told reuters pct imports rest south africa maize import target calendar set mln tonnes compared actual mln	0	0	0	0	1	3	1	0	1	2	8	6	6	7	9	4	9	0	12
european community ec cool initial reaction proposals european commission cereal price measures coming season ec diplomats meetings ec special committee agriculture representatives impact incomes britain netherlands willingness accept package cuts pct common prices cereals commission proposes limitation intervention february march period reduced monthly intervention prices ec farm ministers discu…	1	european community ec cool initial reaction proposals european commission cereal price measures coming season ec diplomats meetings ec special committee agriculture representatives impact incomes britain netherlands willingness accept package cuts pct common prices cereals commission proposes limitation intervention february march period reduced monthly intervention prices ec farm ministers discu…	1	1	3	1	2	4	3	8	3	6	3	1	11	4	14	9	11	6	14
congress eager budget savings review agriculture generic commodity certificate program tomorrow amid signs usda accounting office gao program cost taxpayers gao concluded preliminary report week payment pik certificates cost pct cash outlays administration officials identified usda officials issue report account storage handling transport savings government gao decided examine costs sources issue…	1	congress eager budget savings review agriculture generic commodity certificate program tomorrow amid signs usda accounting office gao program cost taxpayers gao concluded preliminary report week payment pik certificates cost pct cash outlays administration officials identified usda officials issue report account storage handling transport savings government gao decided examine costs sources issue…	0	1	1	4	5	2	7	7	5	8	7	3	3	2	12	2	17	15	13
european ec cereal management committee granted export licences tonnes quality soft bread wheat maximum export rebate european currency units ecus tonne traders committee granted export certificates tonnes barley ecus tonne rejected bids export soft feed wheat certificates granted export tonnes maize maximum rebate ecus tonne traders	1	european ec cereal management committee granted export licences tonnes quality soft bread wheat maximum export rebate european currency units ecus tonne traders committee granted export certificates tonnes barley ecus tonne rejected bids export soft feed wheat certificates granted export tonnes maize maximum rebate ecus tonne traders	0	0	0	0	1	3	1	0	1	2	8	6	6	7	9	4	9	0	12
dry weather pushed south orange free maize triangle week march joint agricultural weather facility agriculture commerce departments summary weather crop bulletin agency scattered showers continued dry northeast south temperatures average degrees normal grain grain corn receiving rainfall agency rainfall february normal earlier periods hot dry weather reduced yield prospects northern southern oran…	1	dry weather pushed south orange free maize triangle week march joint agricultural weather facility agriculture commerce departments summary weather crop bulletin agency scattered showers continued dry northeast south temperatures average degrees normal grain grain corn receiving rainfall agency rainfall february normal earlier periods hot dry weather reduced yield prospects northern southern oran…	0	0	0	4	5	3	7	7	5	8	7	3	3	2	11	11	17	11	11
south african maize production estimate mln tonnes current conservative leading grain produce merchants kahn kahn pty company detailed report estimated harvest mln tonnes forecast met surplus export mln tonnes creating maize board kahn kahn maize export price depressed board necessity maintain increase internal price maize offset loss faced exporting surplus amounts	1	south african maize production estimate mln tonnes current conservative leading grain produce merchants kahn kahn pty company detailed report estimated harvest mln tonnes forecast met surplus export mln tonnes creating maize board kahn kahn maize export price depressed board necessity maintain increase internal price maize offset loss faced exporting surplus amounts	0	0	0	0	1	3	1	0	1	2	8	6	6	7	9	4	9	0	12
government cut consumer rice price official producer price reduced month director economic planning agency epa told reporters cabinet meeting consumers receive benefits falling costs rice farming strong yen lower oil prices agriculture ministry sources producer rice price paid rice farmers cut discussions rice price council advisory body ministry july consumer rice price set december	1	government cut consumer rice price official producer price reduced month director economic planning agency epa told reporters cabinet meeting consumers receive benefits falling costs rice farming strong yen lower oil prices agriculture ministry sources producer rice price paid rice farmers cut discussions rice price council advisory body ministry july consumer rice price set december	0	2	2	3	5	5	7	7	5	8	7	3	3	12	6	11	15	11	11
weekly export inspection report expected steady corn wheat exports lower soybean exports cbt floor forecasts traders projected soybean exports mln mln bushels mln bushels week ago mln bushels ago corn guesses ranged mln mln bushels compared mln bushels week ago bushels ago wheat guesses ranged mln mln bushels compared mln bushels week ago mln bushels ago	1	weekly export inspection report expected steady corn wheat exports lower soybean exports cbt floor forecasts traders projected soybean exports mln mln bushels mln bushels week ago mln bushels ago corn guesses ranged mln mln bushels compared mln bushels week ago bushels ago wheat guesses ranged mln mln bushels compared mln bushels week ago mln bushels ago	0	0	0	0	1	0	5	6	2	7	0	0	0	0	0	0	0	9	7
policy sufficiency rice extreme protectionism visiting agriculture secretary richard lyng told press conference told national press club japan japan export balance countries inconsistent pct sufficient product speaking farm trade talks japan agriculture minister mutsuki kato lyng total liberalisation rice market japan lyng urged japan imports rice access rice market trade representative clayton y…	1	policy sufficiency rice extreme protectionism visiting agriculture secretary richard lyng told press conference told national press club japan japan export balance countries inconsistent pct sufficient product speaking farm trade talks japan agriculture minister mutsuki kato lyng total liberalisation rice market japan lyng urged japan imports rice access rice market trade representative clayton y…	1	1	3	1	2	4	3	1	0	1	10	10	8	13	13	5	8	17	4
joint committee maize importers awarded contracts firms supply shipments totalling tonnes committee spokesman continental grain york won contract supply tonnes priced dlrs tonne taiwan delivery june gulf coast grain memphis tennessee won contract tonnes dlrs tonne taiwan june delivery	1	joint committee maize importers awarded contracts firms supply shipments totalling tonnes committee spokesman continental grain york won contract supply tonnes priced dlrs tonne taiwan delivery june gulf coast grain memphis tennessee won contract tonnes dlrs tonne taiwan june delivery	0	0	0	0	1	3	1	0	1	2	8	6	6	7	9	4	9	0	12
australian wheat shipments rose mln tonnes february mln january australian wheat board official shipments mln tonnes shipped february cumulative shipments months october september wheat mln tonnes mln earlier official major destinations february china tonnes egypt iraq japan south korea soviet union tonnes	1	australian wheat shipments rose mln tonnes february mln january australian wheat board official shipments mln tonnes shipped february cumulative shipments months october september wheat mln tonnes mln earlier official major destinations february china tonnes egypt iraq japan south korea soviet union tonnes	0	0	0	0	1	3	1	0	1	2	8	6	6	7	9	4	9	0	6
agriculture ministry declined comment local newspaper report japan agreed hold talks closed rice market gatt round idea report comment spokesman told reuters quoting unnamed government sources japan agriculture secretary richard lyng trade representative clayton yeutter intentions visit japan month farm talks pressing japan rice issue round agreement tariffs trade talks japan gatt forum imports r…	1	agriculture ministry declined comment local newspaper report japan agreed hold talks closed rice market gatt round idea report comment spokesman told reuters quoting unnamed government sources japan agriculture secretary richard lyng trade representative clayton yeutter intentions visit japan month farm talks pressing japan rice issue round agreement tariffs trade talks japan gatt forum imports r…	1	1	3	1	2	4	3	1	0	1	10	10	8	13	13	1	16	1	17
thailand exported tonnes rice week april tonnes previous week commerce ministry government private exporters shipped tonnes private exporters concluded advance weekly sales tonnes tonnes previous week thailand exported mln tonnes rice mln tonnes ago commitments export tonnes	1	thailand exported tonnes rice week april tonnes previous week commerce ministry government private exporters shipped tonnes private exporters concluded advance weekly sales tonnes tonnes previous week thailand exported mln tonnes rice mln tonnes ago commitments export tonnes	0	0	0	0	1	3	1	0	1	2	8	6	6	7	9	4	9	0	6
senator richard lugar indiana ranking republican senate agriculture committee decided introduce administration bill apply called provision grain crops aide senator reagan administration lugar offer measure aide farm told lugar oppose proposal grounds reopen farm bill senator decided proposal aide week aide lugar planning offer measure bill tighten payment limitation loophole	1	senator richard lugar indiana ranking republican senate agriculture committee decided introduce administration bill apply called provision grain crops aide senator reagan administration lugar offer measure aide farm told lugar oppose proposal grounds reopen farm bill senator decided proposal aide week aide lugar planning offer measure bill tighten payment limitation loophole	1	1	3	4	5	4	7	7	5	8	7	3	3	3	3	2	2	2	13
soviet winter grain crop suffered losses dry planting conditions fall severe cold winter analyst weather crop conditions grain analyst meteorologist martell hutton publication global crop news report soviets import grain wheat potential crop damage compared outlook soviet winter grain crop pessimistic talk disastrous losses lot depend spring weather outcome troubled winter grain crop spring plant…	1	soviet winter grain crop suffered losses dry planting conditions fall severe cold winter analyst weather crop conditions grain analyst meteorologist martell hutton publication global crop news report soviets import grain wheat potential crop damage compared outlook soviet winter grain crop pessimistic talk disastrous losses lot depend spring weather outcome troubled winter grain crop spring plant…	0	0	0	4	5	3	7	7	5	8	7	3	3	3	3	11	4	11	11
west german intervention board accepted tonnes grain start current agricultural month compared mln tonnes july february period accepted tonnes bread wheat nil earlier period nil tonnes quality wheat tonnes feed wheat tonnes tonnes quality tonnes summer barley tonnes winter barley	1	west german intervention board accepted tonnes grain start current agricultural month compared mln tonnes july february period accepted tonnes bread wheat nil earlier period nil tonnes quality wheat tonnes feed wheat tonnes tonnes quality tonnes summer barley tonnes winter barley	0	0	0	0	1	3	1	0	1	2	8	6	6	7	9	4	9	0	6
farmers grown oats failed government allowed continue planting crop eligible corn program benefits aide agriculture secretary richard lyng farmer eligible corn program benefits restrict plantings program crops acreage base crop congress iowa complained farmers failed grown oats halt oats production lose corn program benefits usda historic oats farmers plant oats extend exemption farmers aide	1	farmers grown oats failed government allowed continue planting crop eligible corn program benefits aide agriculture secretary richard lyng farmer eligible corn program benefits restrict plantings program crops acreage base crop congress iowa complained farmers failed grown oats halt oats production lose corn program benefits usda historic oats farmers plant oats extend exemption farmers aide	0	0	0	4	5	3	7	7	5	8	7	3	3	2	12	2	17	15	3
agriculture department release estimated billion dlrs worth certificates certs corn farmers fall usda decides maintain equal split total feedgrain deficiency payments cash certs usda officials final crop deficiency payments feed grain producers october wheat deficiency payments crop complete cash certificate split usda officials feedgrains billion dlrs estimated billion corn deficiency payments a…	1	agriculture department release estimated billion dlrs worth certificates certs corn farmers fall usda decides maintain equal split total feedgrain deficiency payments cash certs usda officials final crop deficiency payments feed grain producers october wheat deficiency payments crop complete cash certificate split usda officials feedgrains billion dlrs estimated billion corn deficiency payments a…	0	0	1	4	5	2	7	7	5	8	7	3	3	2	12	2	17	15	13
planned agriculture calculation price differentials interior grain locations texas gulf senior usda official ralph klopfenstein usda deputy administrator commodity operations told reuters anticipate texas gulf differentials calculate posted county prices corn relate texas gulf structure louisiana gulf structure totally situation rumors circulated market morning usda widened texas gulf differentia…	1	planned agriculture calculation price differentials interior grain locations texas gulf senior usda official ralph klopfenstein usda deputy administrator commodity operations told reuters anticipate texas gulf differentials calculate posted county prices corn relate texas gulf structure louisiana gulf structure totally situation rumors circulated market morning usda widened texas gulf differentia…	0	2	2	4	3	1	0	4	5	9	11	9	12	10	10	15	10	3	10
commodity credit corp ccc accepted bids export bonuses cover sales tonnes hard red winter wheat tonnes soft red winter wheat china agriculture department bonuses awarded averaged dlrs tonne wheat scheduled delivery oct bonus awards cargill tonnes continental grain tonnes mitsubishi international corp tonnes grain tonnes bonuses paid exporters form commodities ccc stocks purchases complete export …	1	commodity credit corp ccc accepted bids export bonuses cover sales tonnes hard red winter wheat tonnes soft red winter wheat china agriculture department bonuses awarded averaged dlrs tonne wheat scheduled delivery oct bonus awards cargill tonnes continental grain tonnes mitsubishi international corp tonnes grain tonnes bonuses paid exporters form commodities ccc stocks purchases complete export …	0	0	0	0	1	3	1	0	9	10	4	2	2	6	5	12	12	14	15
ec commission decide shortly arrange import country maize sorghum ec agreement united commission sources accord reached complaints impact agricultural exports spanish ec membership ec import mln tonnes maize tonnes sorghum produce imported spain special levy levels applying imports ec countries sources spanish intervention board buy produce directly late arrangements choice future appears lie sys…	1	ec commission decide shortly arrange import country maize sorghum ec agreement united commission sources accord reached complaints impact agricultural exports spanish ec membership ec import mln tonnes maize tonnes sorghum produce imported spain special levy levels applying imports ec countries sources spanish intervention board buy produce directly late arrangements choice future appears lie sys…	1	0	0	0	1	3	1	8	3	6	3	1	11	4	14	9	11	6	14
european community ec cereals trade lobby organisation written ec farm commissioner frans andriessen propose system sales intervention claims save ec budget money proposes applications intervention certificate valid execution months months trader market buy certificate payment pct premium argues restore original function intervention safety net situation produce sold intervention	1	european community ec cereals trade lobby organisation written ec farm commissioner frans andriessen propose system sales intervention claims save ec budget money proposes applications intervention certificate valid execution months months trader market buy certificate payment pct premium argues restore original function intervention safety net situation produce sold intervention	1	1	3	1	2	4	3	8	3	6	3	1	11	4	14	9	11	6	14
agriculture department seeking public comments question adjusting commodity credit ccc discount premium schedules improve quality grain accepts loan collateral price support programs premiums discounts schedule based quality factors moisture content kernel damage schedule premiums discounts valuing grain ccc accepts purchases department producers encouraged delivery quality grain ccc adjusting pr…	1	agriculture department seeking public comments question adjusting commodity credit ccc discount premium schedules improve quality grain accepts loan collateral price support programs premiums discounts schedule based quality factors moisture content kernel damage schedule premiums discounts valuing grain ccc accepts purchases department producers encouraged delivery quality grain ccc adjusting pr…	0	0	0	4	5	3	7	7	9	10	4	2	2	6	5	12	12	14	15
sri lanka appealed countries emergency aid mln worst drought government officials received letters weekend outlining aid sixth sri population districts letter government step avert economic hardship social services ministry entire budget provision mln rupees distributing worst hit letter mln rupees month period september rice crop harvested tonnes wheat rice flour cereals required supplies sugar …	1	sri lanka appealed countries emergency aid mln worst drought government officials received letters weekend outlining aid sixth sri population districts letter government step avert economic hardship social services ministry entire budget provision mln rupees distributing worst hit letter mln rupees month period september rice crop harvested tonnes wheat rice flour cereals required supplies sugar …	0	0	0	0	1	0	5	6	2	7	0	0	0	0	0	0	0	9	7
corn sales mln tonnes week april pct prior week pct week average agriculture department comments export sales report department iraq japan ussr largest buyers sales marketing september totaled tonnes iraq taiwan wheat sales tonnes current season net reductions tonnes season combined total prior week week average sri lanka active wheat destination purchases tonnes current purchasers current mexico…	1	corn sales mln tonnes week april pct prior week pct week average agriculture department comments export sales report department iraq japan ussr largest buyers sales marketing september totaled tonnes iraq taiwan wheat sales tonnes current season net reductions tonnes season combined total prior week week average sri lanka active wheat destination purchases tonnes current purchasers current mexico…	0	0	0	0	1	3	1	0	1	2	8	6	6	7	9	4	9	0	6
commodity futures trading commission approved minneapolis grain application trade fructose corn syrup hfcs futures contracts commission contract delivery lbs minus pct bulk hfcs meeting standards physical chemical properties cftc exchange plans trading july hfcs contract april cftc soft drink industry buys pct produced hfcs liquid food beverage sweetener produced processing corn starch corn refin…	1	commodity futures trading commission approved minneapolis grain application trade fructose corn syrup hfcs futures contracts commission contract delivery lbs minus pct bulk hfcs meeting standards physical chemical properties cftc exchange plans trading july hfcs contract april cftc soft drink industry buys pct produced hfcs liquid food beverage sweetener produced processing corn starch corn refin…	0	0	0	4	5	3	7	7	5	8	7	3	3	2	12	2	17	15	3
soviet union fulfill buying obligations ussr grains agreement depends united soviet trade official told reuters ready fulfill agreement united offer grain competitive prices albert melnikov deputy trade representative soviet union united market grains united seller offer soviets competitive prices interview melnikov united lived agreement failing moscow grain prevailing market prices accused impl…	1	soviet union fulfill buying obligations ussr grains agreement depends united soviet trade official told reuters ready fulfill agreement united offer grain competitive prices albert melnikov deputy trade representative soviet union united market grains united seller offer soviets competitive prices interview melnikov united lived agreement failing moscow grain prevailing market prices accused impl…	0	0	0	4	5	3	7	7	5	8	7	3	3	3	3	2	4	10	2
rain wide raised prospect food crops suffered disastrous drought ago head agriculture development department told reporters prospects target tonnes grain growing season normal crop production tonnes tonnes produced rains fall time rains plant quick maturing crops maize barley shortfall period production main season farmers stocks seed regions suffered severely drought crops favourable rains gover…	1	rain wide raised prospect food crops suffered disastrous drought ago head agriculture development department told reporters prospects target tonnes grain growing season normal crop production tonnes tonnes produced rains fall time rains plant quick maturing crops maize barley shortfall period production main season farmers stocks seed regions suffered severely drought crops favourable rains gover…	0	0	0	0	1	3	1	0	1	2	8	6	6	7	9	11	9	11	11
chicago board trade grain traders analysts voiced lot farmers planned handle upcoming spring plantings prompting sales crop months corn oats purchases crop soybeans futures markets grains trade farmers stick corn acres soybeans corn protected acreage reduction program deficiency payments farmers corn prices stay low farmers soybeans loan program sign reduced acreage price guarantees price outlook…	1	chicago board trade grain traders analysts voiced lot farmers planned handle upcoming spring plantings prompting sales crop months corn oats purchases crop soybeans futures markets grains trade farmers stick corn acres soybeans corn protected acreage reduction program deficiency payments farmers corn prices stay low farmers soybeans loan program sign reduced acreage price guarantees price outlook…	0	0	0	4	5	3	7	7	5	8	7	3	3	2	12	2	17	15	3
shipments grain soybeans soviet union week march agriculture export sales report ussr purchased mln tonnes corn delivery fourth ussr grain agreement total shipments ussr grains agreement september amounted tonnes wheat tonnes corn tonnes soybeans shipments ussr amounted tonnes wheat tonnes corn	1	shipments grain soybeans soviet union week march agriculture export sales report ussr purchased mln tonnes corn delivery fourth ussr grain agreement total shipments ussr grains agreement september amounted tonnes wheat tonnes corn tonnes soybeans shipments ussr amounted tonnes wheat tonnes corn	0	0	0	0	1	3	1	0	1	2	8	6	6	7	9	4	9	0	6
agriculture department major pricing system posted county prices agriculture department current plans major adjustments pricing bob sindt usda assistant deputy administrator commodity operations grain traders earlier week usda reduce cash corn price premium gulf versus interior price levels dropping ascs posted prices encourage interior pik roll movement sindt denied usda planning people suggesti…	1	agriculture department major pricing system posted county prices agriculture department current plans major adjustments pricing bob sindt usda assistant deputy administrator commodity operations grain traders earlier week usda reduce cash corn price premium gulf versus interior price levels dropping ascs posted prices encourage interior pik roll movement sindt denied usda planning people suggesti…	0	0	2	4	5	3	7	7	5	8	7	3	3	2	12	2	17	15	3
antwerp libya mt bagged flour orleans mt bulk hss days saudi red sea mt barley mt bagged flour toledo seaforth mt hss offers dlrs days river plate malaysia tons hss apr	1	antwerp libya mt bagged flour orleans mt bulk hss days saudi red sea mt barley mt bagged flour toledo seaforth mt hss offers dlrs days river plate malaysia tons hss apr	0	2	0	4	5	3	6	5	9	10	4	2	2	6	5	12	12	14	15
farmers enrolled mln acres program crops conservation reserve program signup mln acres program crops agriculture department conservation specialists soybean acreage amounted mln acres program crop acreage enrolled usda analyst heavy enrollment base acreage wheat percentage soybean land accounted portion program acreage analyst wheat corn acreage comprised pct total acres accepted ten program usda…	1	farmers enrolled mln acres program crops conservation reserve program signup mln acres program crops agriculture department conservation specialists soybean acreage amounted mln acres program crop acreage enrolled usda analyst heavy enrollment base acreage wheat percentage soybean land accounted portion program acreage analyst wheat corn acreage comprised pct total acres accepted ten program usda…	0	0	0	4	5	0	7	7	5	8	7	3	3	2	12	2	17	15	3
agriculture secretary richard lyng term soviet grain agreement worth extending expires worth lived agreement lyng interview reuters worth effort agreement agreement lyng definitive commitment accord covering soviets agreed buy mln tonnes grain including mln tonnes corn wheat moscow bought mln tonnes corn tonnes wheat agreement september bought mln tonnes corn lyng knowledge grain moscow buy peopl…	1	agriculture secretary richard lyng term soviet grain agreement worth extending expires worth lived agreement lyng interview reuters worth effort agreement agreement lyng definitive commitment accord covering soviets agreed buy mln tonnes grain including mln tonnes corn wheat moscow bought mln tonnes corn tonnes wheat agreement september bought mln tonnes corn lyng knowledge grain moscow buy peopl…	0	0	0	0	1	3	7	7	5	8	7	3	3	3	3	2	4	10	2
generic grain certificates released market certificate program commodities study commodities agriculture department grain deficiency payments paid land diversion payments certificate cash ratio fiscal carroll president commodities told house agriculture subcommittee hearing certificates government payments issued roughly split cash certificates study certificates examined growing season certifica…	1	generic grain certificates released market certificate program commodities study commodities agriculture department grain deficiency payments paid land diversion payments certificate cash ratio fiscal carroll president commodities told house agriculture subcommittee hearing certificates government payments issued roughly split cash certificates study certificates examined growing season certifica…	0	0	1	4	5	2	7	7	5	8	7	3	3	2	12	2	17	15	13
moderately active grain fixing reported business involved continent japan ship brokers steady dlrs paid gulf morocco dlrs paid tons gulf taiwan vessel carrying tons bagged wheat flour gulf received sum dlrs grain lakes algeria dlrs paid fixing march market talk suggested federal commerce vessel booked move grain lakes morocco account dlrs paid cargo oilseeds british columbia japan confirmation co…	1	moderately active grain fixing reported business involved continent japan ship brokers steady dlrs paid gulf morocco dlrs paid tons gulf taiwan vessel carrying tons bagged wheat flour gulf received sum dlrs grain lakes algeria dlrs paid fixing march market talk suggested federal commerce vessel booked move grain lakes morocco account dlrs paid cargo oilseeds british columbia japan confirmation co…	0	0	0	4	5	3	7	7	9	10	4	2	2	6	5	12	6	14	15
thai traders plan establish company regulate maize forward trading step commodities futures exchange maize dealers traders internal trade department officials agreed week commission study structure regulate maize forward trading set company thailand commodity exchange businesses shareholders brokers futures market commodities trader draw study maize futures market succeeds extended commodities su…	1	thai traders plan establish company regulate maize forward trading step commodities futures exchange maize dealers traders internal trade department officials agreed week commission study structure regulate maize forward trading set company thailand commodity exchange businesses shareholders brokers futures market commodities trader draw study maize futures market succeeds extended commodities su…	0	0	3	4	5	3	1	8	3	6	3	1	11	4	14	9	11	6	12
canadian egyptian wheat negotiators failed conclude agreement canadian wheat exports egypt talks week canadian team return cairo negotiations canadian embassy officials embassy official declined identify issues remained resolved talks resume protocol signed cairo agreed purchase tonnes canadian wheat	1	canadian egyptian wheat negotiators failed conclude agreement canadian wheat exports egypt talks week canadian team return cairo negotiations canadian embassy officials embassy official declined identify issues remained resolved talks resume protocol signed cairo agreed purchase tonnes canadian wheat	0	0	0	4	5	3	1	0	1	2	8	6	6	7	9	4	9	0	16
staff commodity futures trading commission cftc recommended regulatory agency approve minneapolis grain application trade fructose corn syrup hfcs futures contracts commission expected approve application meeting tomorrow proposed contract provide delivery lbs minus pct bulk hfcs liquid food beverage sweetener produced processed corn starch corn refiners proposed rules shipping certificate limite…	1	staff commodity futures trading commission cftc recommended regulatory agency approve minneapolis grain application trade fructose corn syrup hfcs futures contracts commission expected approve application meeting tomorrow proposed contract provide delivery lbs minus pct bulk hfcs liquid food beverage sweetener produced processed corn starch corn refiners proposed rules shipping certificate limite…	0	0	0	4	5	3	7	7	5	8	7	3	3	2	12	2	17	15	3
agriculture department detailed supply demand data major importers exporters corn country mln tonnes ussr corn start stocks production imports domes exports nil nil nil nil stocks south africa corn mln tonnes start stcks production imports nil nil domes exports stocks ec corn mln tonnes start stcks production imports domes exports stocks argentina corn mln tonnes start stcks production imports ni…	1	agriculture department detailed supply demand data major importers exporters corn country mln tonnes ussr corn start stocks production imports domes exports nil nil nil nil stocks south africa corn mln tonnes start stcks production imports nil nil domes exports stocks ec corn mln tonnes start stcks production imports domes exports stocks argentina corn mln tonnes start stcks production imports ni…	0	0	0	0	1	3	1	0	1	2	8	6	6	7	9	4	17	15	3
senate republican leader robert dole congress legislation apply called option producers major commodities dole told national corn growers association proposal supported reagan administration considered refusal play hands mandatory controls production dole support option offer producers pct income support payments planted senate republican leader option posed viewed addition debate proposal farm b…	1	senate republican leader robert dole congress legislation apply called option producers major commodities dole told national corn growers association proposal supported reagan administration considered refusal play hands mandatory controls production dole support option offer producers pct income support payments planted senate republican leader option posed viewed addition debate proposal farm b…	1	1	3	4	5	4	7	7	5	8	7	3	3	3	3	2	2	2	13
american farm bureau federation official hurting canadian corn producers farm programs benefit foreign producers president dean comments response ruling earlier canadian import tribunal subsidized corn imports canadian growers tribunal upheld countervailing duty cents bushel farm bureau specialists ottawa testified previous farm programs benefited foreign producers reducing amount corn grown losi…	1	american farm bureau federation official hurting canadian corn producers farm programs benefit foreign producers president dean comments response ruling earlier canadian import tribunal subsidized corn imports canadian growers tribunal upheld countervailing duty cents bushel farm bureau specialists ottawa testified previous farm programs benefited foreign producers reducing amount corn grown losi…	1	1	3	4	5	3	7	7	5	8	7	3	3	2	12	2	17	15	16
european community ec increased size special export tenders british west german feed wheat held intervention stores included south korea acceptable destination traders tender originally tonnes british tonnes west german feed wheat shipment poland tranches increased tonnes tonnes south korea destination tenders june	1	european community ec increased size special export tenders british west german feed wheat held intervention stores included south korea acceptable destination traders tender originally tonnes british tonnes west german feed wheat shipment poland tranches increased tonnes tonnes south korea destination tenders june	0	0	0	0	1	3	1	0	1	2	8	6	6	7	9	4	9	0	6
senate voted unanimously seek probe canadian tariffs corn imports determine united retaliate senate record cents bushel tariff approved canadian import tribunal binding measure probe trade representative determine days tariff agreement tariffs trade recommend days president reagan retaliatory action canada	1	senate voted unanimously seek probe canadian tariffs corn imports determine united retaliate senate record cents bushel tariff approved canadian import tribunal binding measure probe trade representative determine days tariff agreement tariffs trade recommend days president reagan retaliatory action canada	1	1	3	1	2	4	3	1	0	1	2	11	10	8	2	1	16	1	16
grain trade representatives continued speculate reagan administration offer subsidized wheat soviet union agriculture department officials reports pure senior official foreign agricultural service referring rumor administration export enhancement offer moscow weeks aide agriculture secretary richard lyng identified speculation started wheat market wheat futures strengthened partly basis speculati…	1	grain trade representatives continued speculate reagan administration offer subsidized wheat soviet union agriculture department officials reports pure senior official foreign agricultural service referring rumor administration export enhancement offer moscow weeks aide agriculture secretary richard lyng identified speculation started wheat market wheat futures strengthened partly basis speculati…	0	0	0	4	5	3	7	7	5	8	7	3	3	3	3	2	4	10	2
trade representative clayton yeutter export enhancement program eep tool policy yeutter comment response question expand eep cover grain sales soviet union comment directly soviet question decision levels reagan administration yeutter told national grain feed association eep continue tool european community policy selective eep successful pressuring	1	trade representative clayton yeutter export enhancement program eep tool policy yeutter comment response question expand eep cover grain sales soviet union comment directly soviet question decision levels reagan administration yeutter told national grain feed association eep continue tool european community policy selective eep successful pressuring	1	1	3	4	5	4	7	7	5	8	7	3	3	3	3	2	4	10	2
agriculture department private exporters reported purchases foreign sellers tonnes wheat delivery unknown destinations wheat consisting tonnes hard red winter soft red winter delivery season june purchase foreign seller transaction exporter contracts buy produced commodities foreign firm department	1	agriculture department private exporters reported purchases foreign sellers tonnes wheat delivery unknown destinations wheat consisting tonnes hard red winter soft red winter delivery season june purchase foreign seller transaction exporter contracts buy produced commodities foreign firm department	0	0	0	0	1	3	1	0	1	2	8	6	6	7	9	4	9	0	6
joint committee maize importers awarded contracts companies supply shipments maize totalling tonnes committee spokesman told reuters continental grain york received tonne cargo contract priced dlrs tonne peavey minneapolis won shipment tonnes dlrs tonne shipments taiwan set march spokesman	1	joint committee maize importers awarded contracts companies supply shipments maize totalling tonnes committee spokesman told reuters continental grain york received tonne cargo contract priced dlrs tonne peavey minneapolis won shipment tonnes dlrs tonne shipments taiwan set march spokesman	0	0	0	0	1	3	1	0	1	2	8	6	6	7	9	4	9	0	12
agriculture department seeking comments common provisions wheat feedgrains cotton rice programs program provisions common commodity programs decisions regard apply program crops specific comments percentage reduction acreage limitation requirements wheat program loan purchase level marketing loan inventory reduction program provisions implemented percentage acreage reduction pct announced june wh…	1	agriculture department seeking comments common provisions wheat feedgrains cotton rice programs program provisions common commodity programs decisions regard apply program crops specific comments percentage reduction acreage limitation requirements wheat program loan purchase level marketing loan inventory reduction program provisions implemented percentage acreage reduction pct announced june wh…	0	0	0	4	5	3	7	7	5	8	7	3	3	6	5	2	12	14	13
rep pat roberts kan predicted reagan administration ten days weeks offer subsidized wheat soviet union export enhancement program eep roberts comment press conference held republican house agriculture committee based comment aide roberts touch top republican officials possibility expansion eep wheat moscow rumored time industry sources decision issue reagan administration secretary george shultz …	1	rep pat roberts kan predicted reagan administration ten days weeks offer subsidized wheat soviet union export enhancement program eep roberts comment press conference held republican house agriculture committee based comment aide roberts touch top republican officials possibility expansion eep wheat moscow rumored time industry sources decision issue reagan administration secretary george shultz …	1	0	3	4	5	3	7	7	5	8	7	3	3	3	3	2	4	10	2
unfavorable late winter weather conditions main wheat growing yugoslavia prospects emerging winter wheat crop agricultural officer belgrade officer belgrade field report dated march wheat crop set weeks cold spell period warm weather warm weather late february brought wheat crop winter dormancy weeks unusually cold weather damaging effects fields stands yellow brown cast indicating extensive leaf…	1	unfavorable late winter weather conditions main wheat growing yugoslavia prospects emerging winter wheat crop agricultural officer belgrade officer belgrade field report dated march wheat crop set weeks cold spell period warm weather warm weather late february brought wheat crop winter dormancy weeks unusually cold weather damaging effects fields stands yellow brown cast indicating extensive leaf…	0	0	0	4	5	3	7	7	5	8	7	3	3	3	3	11	4	11	11
agreement european community ec special imports maize sorghum equal chance ec countries supply spanish market ec commission spokeswoman denied clause agreement guaranteed bulk maize export business ec official told reuters yesterday agreement ec import mln tonnes maize tonnes sorghum spain specially reduced levy rates commission decide maize direct purchases spanish intervention board tender syst…	1	agreement european community ec special imports maize sorghum equal chance ec countries supply spanish market ec commission spokeswoman denied clause agreement guaranteed bulk maize export business ec official told reuters yesterday agreement ec import mln tonnes maize tonnes sorghum spain specially reduced levy rates commission decide maize direct purchases spanish intervention board tender syst…	0	0	0	0	1	3	1	8	3	6	3	1	11	4	14	9	11	6	14
agriculture minister disagreed court barring grain buying agency epac cereals import tenders private traders told reporters aim epac tenders terms january accession european community ec grain import monopoly held epac de de reduced pct annually imports liberalised legal proceedings private importers civil court decided preliminary ruling earlier month epac allowed tenders liberalised share annua…	1	agriculture minister disagreed court barring grain buying agency epac cereals import tenders private traders told reporters aim epac tenders terms january accession european community ec grain import monopoly held epac de de reduced pct annually imports liberalised legal proceedings private importers civil court decided preliminary ruling earlier month epac allowed tenders liberalised share annua…	0	0	0	0	1	3	1	8	3	6	3	1	11	4	14	9	11	6	14
oklahoma weekly usda crop report cold weather slowed crop development caused cattle wheat growth halted cold weather rain week prevented fertilizer application fields west short nitrogen moderate insect activity southwest region wheat condition rated pct fair pct pct excellent row crop activity slow amid wet conditions moisture rated pct adequate pct surplus moisture rated pct adequate days suita…	1	oklahoma weekly usda crop report cold weather slowed crop development caused cattle wheat growth halted cold weather rain week prevented fertilizer application fields west short nitrogen moderate insect activity southwest region wheat condition rated pct fair pct pct excellent row crop activity slow amid wet conditions moisture rated pct adequate pct surplus moisture rated pct adequate days suita…	0	0	0	4	5	3	7	7	5	8	7	8	9	11	11	11	13	11	11
moderate heavy rain continued double crop rice eastern eastern fujian week march joint agricultural weather facility agriculture commerce departments international weather crop summary agency moisture irrigation moisture rice planting adequate rain guangdong southern rice fields requiring light showers southern sichuan increased moisture corn planting slow start earlier dryness north china plain …	1	moderate heavy rain continued double crop rice eastern eastern fujian week march joint agricultural weather facility agriculture commerce departments international weather crop summary agency moisture irrigation moisture rice planting adequate rain guangdong southern rice fields requiring light showers southern sichuan increased moisture corn planting slow start earlier dryness north china plain …	0	0	0	4	5	3	7	7	5	8	7	3	3	11	11	11	13	11	11
ec cereals management committee agreed brussels tonnes intervention wheat sale market months ministry agriculture committee agreed tonnes wheat april tonnes month assurance tonnes allocated june complete tonnes originally requested ministry sales intervention july august discussed earlier paris trade sources ec commission tonnes british intervention feed wheat sale domestic market	1	ec cereals management committee agreed brussels tonnes intervention wheat sale market months ministry agriculture committee agreed tonnes wheat april tonnes month assurance tonnes allocated june complete tonnes originally requested ministry sales intervention july august discussed earlier paris trade sources ec commission tonnes british intervention feed wheat sale domestic market	0	0	0	0	1	3	1	0	1	2	8	6	6	7	9	4	9	0	6
tunisia expected tender april tonnes french soft wheat delivery august covered french export credit agency export credits traders official tender announced tunisia france sold total tonnes soft wheat tunisia current campaign covered export credits amount total tonnes exported march	1	tunisia expected tender april tonnes french soft wheat delivery august covered french export credit agency export credits traders official tender announced tunisia france sold total tonnes soft wheat tunisia current campaign covered export credits amount total tonnes exported march	0	0	0	0	1	3	1	0	1	2	8	6	6	7	9	4	9	0	12
danish crops weeks normal growth levels cold weather june temperatures centigrade average plant bureau report crop test june bureau rated crops june figure represents normal average growth conditions crop damage test ratings expressed factor winter wheat winter winter barley spring barley oats sugar beets winter rapeseed spring rapeseed final harvest figures	1	danish crops weeks normal growth levels cold weather june temperatures centigrade average plant bureau report crop test june bureau rated crops june figure represents normal average growth conditions crop damage test ratings expressed factor winter wheat winter winter barley spring barley oats sugar beets winter rapeseed spring rapeseed final harvest figures	0	0	0	4	5	3	7	7	5	8	7	3	3	11	11	11	13	11	11
graan elevator mij balance port grains oilseeds derivatives rose tonnes april week earlier arrivals tonnes tonnes week balance comprised tonnes grains oilseeds tonnes derivatives estimated arrivals total tonnes grains oilseeds derivatives figures cover pct rotterdam traffic products concerned	1	graan elevator mij balance port grains oilseeds derivatives rose tonnes april week earlier arrivals tonnes tonnes week balance comprised tonnes grains oilseeds tonnes derivatives estimated arrivals total tonnes grains oilseeds derivatives figures cover pct rotterdam traffic products concerned	0	0	0	0	1	3	1	0	1	2	8	6	6	7	9	4	9	0	6
corn soybean crops condition suffered yield deterioration hot dry weather agriculture department private weather crop analysts reduction yield potential norton strommen chief meteorologist usda told reuters corn soybean crop condition progressing ahead normal hot dry weather midwestern crop sparked sharp rally chicago futures causing crop soybeans advance cent daily limit dlrs bushel september co…	1	corn soybean crops condition suffered yield deterioration hot dry weather agriculture department private weather crop analysts reduction yield potential norton strommen chief meteorologist usda told reuters corn soybean crop condition progressing ahead normal hot dry weather midwestern crop sparked sharp rally chicago futures causing crop soybeans advance cent daily limit dlrs bushel september co…	0	0	0	4	5	3	7	7	5	8	7	3	3	2	12	11	17	11	11
taiwan flour mills association import tonnes wheat canada calendar unchanged level association spokesman told reuters total delivered shipments shipped taiwan march april total wheat import target set tonnes actual imports wheat imports spokesman	1	taiwan flour mills association import tonnes wheat canada calendar unchanged level association spokesman told reuters total delivered shipments shipped taiwan march april total wheat import target set tonnes actual imports wheat imports spokesman	0	0	0	0	1	3	1	0	1	2	8	6	6	7	9	4	9	0	6
asia linked scientists complex understood el nino weather pattern lt accu weather commercial weather forecasting service rice wheat farmers china wheat sugarcane growers australia tea planters sri lanka losses respective harvests rains arrive time break reports government officials hong kong daily close peking links drought worst provinces adequate rainfall months rice planting threatened provinc…	1	asia linked scientists complex understood el nino weather pattern lt accu weather commercial weather forecasting service rice wheat farmers china wheat sugarcane growers australia tea planters sri lanka losses respective harvests rains arrive time break reports government officials hong kong daily close peking links drought worst provinces adequate rainfall months rice planting threatened provinc…	0	0	0	4	5	3	7	7	5	8	7	8	9	11	11	11	13	11	11
commodity credit corporation ccc accepted bids export bonuses cover sales tonnes wheat flour iraq agriculture department department bonuses awarded averaged dlrs tonne shipment periods march april tonnes april tonnes bonus awards peavey company paid form commodities ccc stocks additional tonnes wheat flour iraq export enhancement program announced january department	1	commodity credit corporation ccc accepted bids export bonuses cover sales tonnes wheat flour iraq agriculture department department bonuses awarded averaged dlrs tonne shipment periods march april tonnes april tonnes bonus awards peavey company paid form commodities ccc stocks additional tonnes wheat flour iraq export enhancement program announced january department	0	0	0	4	5	3	1	0	9	10	4	2	2	6	5	12	12	14	15
european commission authorised buy mln tonnes maize intervention stores half june sales intervention april commission sources approval cereals management committee market heavy imports maize agreement ec united agreement guarantees access spanish market mln tonnes ec maize sources intervention price maize ecus tonne price decision designed prevent massive offers maize intervention ahead normal ap…	1	european commission authorised buy mln tonnes maize intervention stores half june sales intervention april commission sources approval cereals management committee market heavy imports maize agreement ec united agreement guarantees access spanish market mln tonnes ec maize sources intervention price maize ecus tonne price decision designed prevent massive offers maize intervention ahead normal ap…	0	0	0	0	1	3	1	8	3	6	3	1	11	4	14	9	11	6	12
agriculture secretary richard lyng disappointed canadian government finding corn injured ontario corn growers action helpful context ongoing canada free trade talks round multilateral trade negotiations lyng statement canadian government ottawa continue apply duty cents bushel corn imports lyng corn imports canadian corn producers adding corn exports canada declining canada canadian corn coarse g…	1	agriculture secretary richard lyng disappointed canadian government finding corn injured ontario corn growers action helpful context ongoing canada free trade talks round multilateral trade negotiations lyng statement canadian government ottawa continue apply duty cents bushel corn imports lyng corn imports canadian corn producers adding corn exports canada declining canada canadian corn coarse g…	1	1	3	4	5	3	7	7	5	8	7	3	3	2	12	2	17	15	16
britain australia offered total tonnes wheat bangladesh grants rising cereal prices support rural employment projects officials tonnes wheat promised britain shipped week food program program workers building roads irrigation engaged rural development activities daily wages wheat money tonnes australian wheat arrive bangladesh month sold market operations designed price increases officials prices…	1	britain australia offered total tonnes wheat bangladesh grants rising cereal prices support rural employment projects officials tonnes wheat promised britain shipped week food program program workers building roads irrigation engaged rural development activities daily wages wheat money tonnes australian wheat arrive bangladesh month sold market operations designed price increases officials prices…	0	0	0	0	1	3	1	0	1	2	8	6	6	7	9	4	9	0	6
kansas republican congressman pat roberts urged reagan administration offer export enhancement program eep subsidies soviet union speaking house foreign agriculture subcommittee roberts offered eep china poland soviet union rep roberts talk issue eep moscow raised reagan administration secretary george shultz country tom kay agriculture department foreign agricultural service administrator kay to…	1	kansas republican congressman pat roberts urged reagan administration offer export enhancement program eep subsidies soviet union speaking house foreign agriculture subcommittee roberts offered eep china poland soviet union rep roberts talk issue eep moscow raised reagan administration secretary george shultz country tom kay agriculture department foreign agricultural service administrator kay to…	1	0	3	4	5	3	7	7	5	8	7	3	3	3	3	2	4	10	2
upcoming considered agriculture transportation loan programs outlined usda official addressing annual meeting national grain feed association tom assistant deputy administrator county operations consideration usda termination transportation assistance program wheat barley sorghum proposed week reserve program consideration department final decision pik roll grain reserve heavy consideration loan …	1	upcoming considered agriculture transportation loan programs outlined usda official addressing annual meeting national grain feed association tom assistant deputy administrator county operations consideration usda termination transportation assistance program wheat barley sorghum proposed week reserve program consideration department final decision pik roll grain reserve heavy consideration loan …	0	0	0	4	5	3	7	7	5	8	7	3	3	2	12	2	17	15	3
secretary george shultz decided oppose wheat subsidy offer soviet union left final decision sell subsidized wheat moscow president reagan agriculture department department official shultz feels fought battle subsidy summer basically usda decisions official usda decides ahead subsidy offer soviet union shultz wage vigorous campaign favor president voice objections official statement remarks yester…	1	secretary george shultz decided oppose wheat subsidy offer soviet union left final decision sell subsidized wheat moscow president reagan agriculture department department official shultz feels fought battle subsidy summer basically usda decisions official usda decides ahead subsidy offer soviet union shultz wage vigorous campaign favor president voice objections official statement remarks yester…	0	0	0	4	5	3	7	7	5	8	7	3	3	3	3	2	4	10	2
european commission proposed minimum standards sales durum wheat intervention stores european community sources document drawn commission officials proposes reduction maximum level pct increase minimum weight kilos tightening technical standards introduction current public stocks durum wheat ec mln tonnes mln italy	1	european commission proposed minimum standards sales durum wheat intervention stores european community sources document drawn commission officials proposes reduction maximum level pct increase minimum weight kilos tightening technical standards introduction current public stocks durum wheat ec mln tonnes mln italy	0	0	0	0	1	3	1	8	3	6	3	1	11	4	14	9	11	6	14
agriculture department reported farmer owned reserve national day average price april dlrs bu sorghum cwt loan release call rate level price price wheat iv vi corn iv rates loan release call rate level price price oats barley iv sorghum iv reserves ii iii level iv reflects grain entered oct feedgrain july wheat level wheat barley corn sorghum level vi covers wheat entered january rates dlrs cwt l…	1	agriculture department reported farmer owned reserve national day average price april dlrs bu sorghum cwt loan release call rate level price price wheat iv vi corn iv rates loan release call rate level price price oats barley iv sorghum iv reserves ii iii level iv reflects grain entered oct feedgrain july wheat level wheat barley corn sorghum level vi covers wheat entered january rates dlrs cwt l…	0	0	0	4	5	3	7	7	5	8	7	3	3	2	12	2	17	15	3
dutch central bank announced eleven day special advances unchanged pct aid money market liquidity covering period march amount set tender monday march gmt facility replace current billion guilders day advances expiring monday money dealers estimated money market shortage billion guilders barely changed yesterday call money pct result tight set bids accepted bank previous day facility	1	dutch central bank announced eleven day special advances unchanged pct aid money market liquidity covering period march amount set tender monday march gmt facility replace current billion guilders day advances expiring monday money dealers estimated money market shortage billion guilders barely changed yesterday call money pct result tight set bids accepted bank previous day facility	0	2	1	2	0	2	4	3	6	0	5	8	9	11	11	6	13	13	8
jamaica bought corn wheat rice tender earlier week pl funds department agriculture official purchase consisted cargoes cargill sold tonnes soft red winter srw wheat shipment dlrs tonne fob gulf ports continental grain tonnes northern spring northern spring wheat pct protein april dlrs fob gulf excluding tonnes srw wheat june july dlrs fob gulf tonnes wheat pct protein june dlrs fob gulf cargill t…	1	jamaica bought corn wheat rice tender earlier week pl funds department agriculture official purchase consisted cargoes cargill sold tonnes soft red winter srw wheat shipment dlrs tonne fob gulf ports continental grain tonnes northern spring northern spring wheat pct protein april dlrs fob gulf excluding tonnes srw wheat june july dlrs fob gulf tonnes wheat pct protein june dlrs fob gulf cargill t…	0	0	0	0	1	3	1	0	1	2	8	6	6	7	9	4	9	0	6
canadian import tribunal ruled subsidized corn imports canadian growers upheld countervailing duty cts bushel set earlier ruling result trade action launched ontario corn producers association subsidies driving american corn prices canadian production costs spokesman department revenue study level duty undertaken months determine adjusted	1	canadian import tribunal ruled subsidized corn imports canadian growers upheld countervailing duty cts bushel set earlier ruling result trade action launched ontario corn producers association subsidies driving american corn prices canadian production costs spokesman department revenue study level duty undertaken months determine adjusted	0	1	3	4	5	3	7	7	5	8	7	3	3	2	12	2	17	15	16
shifts mild cold weather east germany damaged winter barley late sown winter wheat central regions barley north berlin agricultural officer east berlin field report officer indications winter kill hectares compared damage limited southern central regions widespread north damage severe plants ground snow cover officer heavy night sunshine day led developed plants winter barley ground surface stand…	1	shifts mild cold weather east germany damaged winter barley late sown winter wheat central regions barley north berlin agricultural officer east berlin field report officer indications winter kill hectares compared damage limited southern central regions widespread north damage severe plants ground snow cover officer heavy night sunshine day led developed plants winter barley ground surface stand…	0	0	0	4	5	3	7	7	5	8	7	3	3	3	11	11	13	11	11
soviet winter grains start spring dry fall cold winter weather crop analysts prospects record grain harvest soviet union dim premature forecast major crop analysts situation careful watching weeks ultimately impact soviet grain supply future buying plans analysts soviet union weather soviets start lower crop martell chief meteorologist hutton weeks grain growing crucial period determine final out…	1	soviet winter grains start spring dry fall cold winter weather crop analysts prospects record grain harvest soviet union dim premature forecast major crop analysts situation careful watching weeks ultimately impact soviet grain supply future buying plans analysts soviet union weather soviets start lower crop martell chief meteorologist hutton weeks grain growing crucial period determine final out…	0	0	0	4	5	3	7	7	5	8	7	3	3	3	3	11	4	11	11
agriculture secretary richard lyng intend wheat export enhancement initiative soviet union cabinet level economic policy council meeting set tomorrow aide lyng lyng intend bring aide adding subsidy offer remains lyng plans spend minutes reviewing status farm legislation capitol hill economic policy council responsible economic policy aide usda secretary met morning house foreign affairs committee…	1	agriculture secretary richard lyng intend wheat export enhancement initiative soviet union cabinet level economic policy council meeting set tomorrow aide lyng lyng intend bring aide adding subsidy offer remains lyng plans spend minutes reviewing status farm legislation capitol hill economic policy council responsible economic policy aide usda secretary met morning house foreign affairs committee…	1	1	3	4	5	3	7	7	5	8	7	3	3	3	3	2	4	10	2
fresh heavy rains caused damage argentine coarse grains crop week yesterday buenos aires province trade sources sunflower maize soybean sorghum crops damaged yield estimates production forecasts crops rains weekend yesterday registered mm average western buenos aires worsened flooding province weather bureau rains buenos aires surpassed mm days continue northeast country hit heavy rains province …	1	fresh heavy rains caused damage argentine coarse grains crop week yesterday buenos aires province trade sources sunflower maize soybean sorghum crops damaged yield estimates production forecasts crops rains weekend yesterday registered mm average western buenos aires worsened flooding province weather bureau rains buenos aires surpassed mm days continue northeast country hit heavy rains province …	0	0	0	0	1	0	5	6	1	2	8	6	6	7	9	4	9	0	6
size french carryover barley stocks estimated mln tonnes compared tonnes worrying french cereals intervention office onic director bernard told journalists estimates unchanged february previous month export forecasts lowered mln tonnes mln called ec commission larger volume export certificates outlets french barley amount intervention amount french barley intervention amount outlook french maize …	1	size french carryover barley stocks estimated mln tonnes compared tonnes worrying french cereals intervention office onic director bernard told journalists estimates unchanged february previous month export forecasts lowered mln tonnes mln called ec commission larger volume export certificates outlets french barley amount intervention amount french barley intervention amount outlook french maize …	0	0	0	0	1	3	1	0	1	2	8	6	6	7	9	4	9	0	12
weekend rain western corn belt brought relief crop dry earlier month developing weather patterns bring moisture central eastern belt locations week dale mohler senior meteorologist accu weather rain days fairly wet pattern normal normal moisture week mohler rainfall averaged inch southern minnesota inch southwest iowa inch eastern nebraska inches south central nebraska illinois fields virtually r…	1	weekend rain western corn belt brought relief crop dry earlier month developing weather patterns bring moisture central eastern belt locations week dale mohler senior meteorologist accu weather rain days fairly wet pattern normal normal moisture week mohler rainfall averaged inch southern minnesota inch southwest iowa inch eastern nebraska inches south central nebraska illinois fields virtually r…	0	0	0	4	5	3	7	7	5	8	7	3	3	2	12	11	17	11	11
france sold tonnes wheat flour china director cereal intervention board onic bernard details sale french worried unfair competition facing french flour lack season storage premiums wheat onic raised estimate flour exports mln tonnes compared mln forecast march mln exported	1	france sold tonnes wheat flour china director cereal intervention board onic bernard details sale french worried unfair competition facing french flour lack season storage premiums wheat onic raised estimate flour exports mln tonnes compared mln forecast march mln exported	0	0	0	0	1	3	1	0	1	2	8	6	6	7	9	4	9	0	12
anticipated competitive prices political soviet corn industry government officials rumors circulated grain markets soviet union purchased additional mln tonnes corn industry government sources factors soviet buying corn supply concerns trade sources speculation soviet grain crop revised mln tonnes mln announced increasing soviet grain drop argentine corn crop prospects affect soviet corn buying a…	1	anticipated competitive prices political soviet corn industry government officials rumors circulated grain markets soviet union purchased additional mln tonnes corn industry government sources factors soviet buying corn supply concerns trade sources speculation soviet grain crop revised mln tonnes mln announced increasing soviet grain drop argentine corn crop prospects affect soviet corn buying a…	0	0	0	4	5	3	7	7	5	8	7	3	3	2	12	2	17	15	2
chicago board trade cbt agricultural financial futures markets period major exchange ahead planned cbt spokesman told reuters exchange options identify cost effective efficient proceed including involve moving entire grains floor building nearby commodity exchange cbt chairman agenda items proceed financial futures spokesman cbt official executive vice president george issue discussed friday spec…	1	chicago board trade cbt agricultural financial futures markets period major exchange ahead planned cbt spokesman told reuters exchange options identify cost effective efficient proceed including involve moving entire grains floor building nearby commodity exchange cbt chairman agenda items proceed financial futures spokesman cbt official executive vice president george issue discussed friday spec…	1	1	3	4	5	4	7	7	5	8	7	3	3	2	12	14	17	15	3
rising demand rice gradually reduce surpluses marketing loan increase share rice market sluggish trade agriculture department quarterly rice outlook situation summary department rice production marketing causing stocks fall mln earlier estimated mln cwt july grain acreage percentage total acreage expected decline report usda factors supportive increased grain acreage domestic prices medium grain …	1	rising demand rice gradually reduce surpluses marketing loan increase share rice market sluggish trade agriculture department quarterly rice outlook situation summary department rice production marketing causing stocks fall mln earlier estimated mln cwt july grain acreage percentage total acreage expected decline report usda factors supportive increased grain acreage domestic prices medium grain …	0	0	0	4	5	3	7	7	5	8	7	3	3	2	12	11	17	11	11
mln bushels government grain allocated redemptions commodity certificates program april commodity credit corporation redemptions included mln bushels corn valued mln dlrs average bushel price dlrs current grain issued december ccc wheat redemptions totaled mln bushels valued mln dlrs	1	mln bushels government grain allocated redemptions commodity certificates program april commodity credit corporation redemptions included mln bushels corn valued mln dlrs average bushel price dlrs current grain issued december ccc wheat redemptions totaled mln bushels valued mln dlrs	0	0	0	4	5	0	5	6	2	7	0	0	0	0	0	0	0	9	7
tonnes corn worth mln pesos philippines months manila bulletin newspaper quoting official national food authority official named corn shortage customs coast guard personnel ban corn imports aimed saving foreign currency newspaper quoted marketing director monthly corn consumption stood tonnes national stock inventory tonnes continuing drought hectares corn led loss tonnes corn worth mln pesos con…	1	tonnes corn worth mln pesos philippines months manila bulletin newspaper quoting official national food authority official named corn shortage customs coast guard personnel ban corn imports aimed saving foreign currency newspaper quoted marketing director monthly corn consumption stood tonnes national stock inventory tonnes continuing drought hectares corn led loss tonnes corn worth mln pesos con…	0	0	0	0	1	3	1	0	1	2	8	6	6	7	9	4	9	0	6
agriculture department extended april agricultural stabilization conservation county offices determine eligibility individuals entities payments farm programs jerome director cotton grain rice price support division decision meant farmers april file farm operating plan indicating persons involved farming operations earlier usda extended deadline april march administrator hertz statement extension…	1	agriculture department extended april agricultural stabilization conservation county offices determine eligibility individuals entities payments farm programs jerome director cotton grain rice price support division decision meant farmers april file farm operating plan indicating persons involved farming operations earlier usda extended deadline april march administrator hertz statement extension…	0	0	0	4	5	3	7	7	5	8	7	3	3	2	12	2	17	15	13
dart corp offered buy supermarkets corp dlrs share cash earlier supermarkets unsolicited party offer analysts estimated billion dlrs based mln shares outstanding kidder peabody told dart affiliate prepared advance mln dlrs subordinated	1	dart corp offered buy supermarkets corp dlrs share cash earlier supermarkets unsolicited party offer analysts estimated billion dlrs based mln shares outstanding kidder peabody told dart affiliate prepared advance mln dlrs subordinated	0	2	1	2	0	0	5	6	2	7	0	0	0	0	0	0	6	9	7
corn sales gained tonnes week february weekly total august quarter times prior level agriculture department comments export sales report department sales mln tonnes ussr reported daily reporting system sales delivery ussr fourth ussr grains supply agreement october japan tonnes previous purchases sales unknown destinations rose tonnes wheat sales tonnes current season season half previous combine…	1	corn sales gained tonnes week february weekly total august quarter times prior level agriculture department comments export sales report department sales mln tonnes ussr reported daily reporting system sales delivery ussr fourth ussr grains supply agreement october japan tonnes previous purchases sales unknown destinations rose tonnes wheat sales tonnes current season season half previous combine…	0	0	0	0	1	3	1	0	1	2	8	6	6	7	9	4	9	0	6
agriculture department offer dlr bushel bonus payment corn farmers enrolled conservation reserve program aide usda secretary richard lyng sen charles iowa yesterday lyng farmers dlr bonus offered corn farmers signing program month aide lyng doubtful department offer retroactive bonus farmers enrolled land conservation reserve tide referring demands follow commodity	1	agriculture department offer dlr bushel bonus payment corn farmers enrolled conservation reserve program aide usda secretary richard lyng sen charles iowa yesterday lyng farmers dlr bonus offered corn farmers signing program month aide lyng doubtful department offer retroactive bonus farmers enrolled land conservation reserve tide referring demands follow commodity	0	0	0	4	5	3	7	7	5	8	7	3	3	2	12	2	17	15	3
french cereal exports port fell pct tonnes period february period february trade sources main destinations saudi arabia tonnes barley soviet union wheat italy wheat spain wheat maize china wheat algeria wheat february ships loaded tonnes cereals sources tonnes comprised tonnes wheat china wheat soviet union wheat algeria friday sources estimated tonnes cereals loaded comprising tonnes barley whea…	1	french cereal exports port fell pct tonnes period february period february trade sources main destinations saudi arabia tonnes barley soviet union wheat italy wheat spain wheat maize china wheat algeria wheat february ships loaded tonnes cereals sources tonnes comprised tonnes wheat china wheat soviet union wheat algeria friday sources estimated tonnes cereals loaded comprising tonnes barley whea…	0	0	0	0	1	3	1	0	1	2	8	6	6	7	9	4	9	0	12
hot dry weather midwest forecast pushed grain futures prices highs chicago board trade soybean futures led advance closing cent bushel daily trading limit contracts delivery fall harvest months set life contract highs november closed dlrs bushel market anticipating stay normal time david assistant vice president merrill lynch time measure level soymeal futures led grain rally week posted contract…	1	hot dry weather midwest forecast pushed grain futures prices highs chicago board trade soybean futures led advance closing cent bushel daily trading limit contracts delivery fall harvest months set life contract highs november closed dlrs bushel market anticipating stay normal time david assistant vice president merrill lynch time measure level soymeal futures led grain rally week posted contract…	0	0	0	4	5	3	7	7	5	8	7	3	3	2	12	11	17	15	3
commodity credit corporation ccc accepted bids export cover sales tonnes barley saudi arabia agriculture department ccc accepted bonus offers exporter averaged dlrs tonne barley delivery august november tonnes bonus awards louis dreyfus corporation paid form commodities ccc stocks additional tonnes barley saudi arabia export enhancement program initiative	1	commodity credit corporation ccc accepted bids export cover sales tonnes barley saudi arabia agriculture department ccc accepted bonus offers exporter averaged dlrs tonne barley delivery august november tonnes bonus awards louis dreyfus corporation paid form commodities ccc stocks additional tonnes barley saudi arabia export enhancement program initiative	0	0	0	4	5	3	1	0	9	10	4	2	2	6	5	12	12	14	15
agriculture department actively offering subsidized wheat soviet union export enhancement program eep senior usda officials grain trade analysts proposal ruled offer future grain companies fired aide agriculture secretary richard lyng talk informally formally analysts interviewed reuters confident usda officials bonus wheat offered soviets officials offer held grain talks soviet counterparts earl…	1	agriculture department actively offering subsidized wheat soviet union export enhancement program eep senior usda officials grain trade analysts proposal ruled offer future grain companies fired aide agriculture secretary richard lyng talk informally formally analysts interviewed reuters confident usda officials bonus wheat offered soviets officials offer held grain talks soviet counterparts earl…	0	0	0	4	5	3	7	7	5	8	7	3	3	3	3	2	4	10	2
survey provinces cities pct grain stocks china daily mln tonnes pct fruit output left rot mln tonnes pct vegetables paper blamed waste inadequate storage bad methods government launched national programme reduce waste calling improved technology storage production paper details	1	survey provinces cities pct grain stocks china daily mln tonnes pct fruit output left rot mln tonnes pct vegetables paper blamed waste inadequate storage bad methods government launched national programme reduce waste calling improved technology storage production paper details	0	0	0	0	1	0	1	0	1	2	8	8	9	11	11	6	13	13	8
farmland left grow grain middle official edge shanghai sums dilemma china feed billion people time building factories homes china feed quarter population seventh land arable sharp increases farm output china net grain exporter time rapid occurred time arable land factories homes afford official figures china lost pct arable land amount gained mln feed lost land prior official families county buil…	1	farmland left grow grain middle official edge shanghai sums dilemma china feed billion people time building factories homes china feed quarter population seventh land arable sharp increases farm output china net grain exporter time rapid occurred time arable land factories homes afford official figures china lost pct arable land amount gained mln feed lost land prior official families county buil…	0	0	0	4	5	3	7	7	5	8	7	3	3	2	12	11	17	11	11
fob gulf corn values firmer active gulf boosted gulf fob cif values exporters loading programs slow country movement gulf indications tonnes traded august shipment cents september tonnes traded yesterday june cents july tonnes corn traded yesterday atlantic hard wheat offers firm amid tight pipeline supplies dealers quoted afternoon fob gulf values basis chicago futures hard red winter wheat basi…	1	fob gulf corn values firmer active gulf boosted gulf fob cif values exporters loading programs slow country movement gulf indications tonnes traded august shipment cents september tonnes traded yesterday june cents july tonnes corn traded yesterday atlantic hard wheat offers firm amid tight pipeline supplies dealers quoted afternoon fob gulf values basis chicago futures hard red winter wheat basi…	0	0	0	4	5	3	7	7	9	10	4	2	2	6	5	12	12	14	3
agriculture secretariat set support prices grains oilseeds official statement support price wheat australs tonne sunflowerseed northwestern argentina australs price monday secretariat support price sorghum increased australs tonne australs maize australs australs	1	agriculture secretariat set support prices grains oilseeds official statement support price wheat australs tonne sunflowerseed northwestern argentina australs price monday secretariat support price sorghum increased australs tonne australs maize australs australs	0	0	0	4	5	3	7	7	5	8	7	3	3	3	3	12	15	5	12
china tonnes wheat purchases delivery season cancelled tonnes wheat purchases delivery season agriculture department export sales report covering transactions week february china outstanding wheat commitments season tonnes tonnes delivery season wheat season june china total corn commitments tonnes soybeans commitments tonnes season corn soybeans september	1	china tonnes wheat purchases delivery season cancelled tonnes wheat purchases delivery season agriculture department export sales report covering transactions week february china outstanding wheat commitments season tonnes tonnes delivery season wheat season june china total corn commitments tonnes soybeans commitments tonnes season corn soybeans september	0	0	0	0	1	3	1	0	1	2	8	6	6	7	9	4	9	0	6
summer grain harvest drought council cabinet spent billion yuan irrigation anti drought hong kong newspaper drought hebei henan eased march rains south china march north irrigation projects drought worsen hope bumper harvest quoted experts ministry electric power figures summer grain harvest record mln tonnes mln total grain harvest mln target mln	1	summer grain harvest drought council cabinet spent billion yuan irrigation anti drought hong kong newspaper drought hebei henan eased march rains south china march north irrigation projects drought worsen hope bumper harvest quoted experts ministry electric power figures summer grain harvest record mln tonnes mln total grain harvest mln target mln	0	0	0	0	1	0	5	6	2	7	0	0	0	0	0	11	0	11	11
generic commodity certificates helped ease storage export promotion programs senior executive largest grain company testifying house agriculture subcommittee wheat soybeans feedgrains johnson vice president cargill disputed claims grain companies huge profits certificate trading certs program windfall trade johnson cargill dealing pct spread certificate transactions normal grain marketing levels …	1	generic commodity certificates helped ease storage export promotion programs senior executive largest grain company testifying house agriculture subcommittee wheat soybeans feedgrains johnson vice president cargill disputed claims grain companies huge profits certificate trading certs program windfall trade johnson cargill dealing pct spread certificate transactions normal grain marketing levels …	0	0	0	4	5	3	7	7	5	8	7	3	3	2	12	2	2	2	13
insects threatening hectares spring rice crop northern vietnam radio reported drought hit hectares hectares badly short supply rice fields radio red river delta coastal northern vietnam produce cent rice radio report monitored bangkok april translated weekend threatened damage spread vietnam grow food expanding population soviet union buying rice thailand supply vietnam vietnam produced tonnes fo…	1	insects threatening hectares spring rice crop northern vietnam radio reported drought hit hectares hectares badly short supply rice fields radio red river delta coastal northern vietnam produce cent rice radio report monitored bangkok april translated weekend threatened damage spread vietnam grow food expanding population soviet union buying rice thailand supply vietnam vietnam produced tonnes fo…	0	0	0	0	1	3	1	0	1	2	8	6	6	7	9	11	9	11	11
french operators requested licences export tonnes free market feed wheat tonnes soft bread wheat tonnes barley tonnes maize european community tender trade sources rebates requested ranged european currency units ecus tonne feed wheat ecus tonne bread wheat ecus barley ecus maize	1	french operators requested licences export tonnes free market feed wheat tonnes soft bread wheat tonnes barley tonnes maize european community tender trade sources rebates requested ranged european currency units ecus tonne feed wheat ecus tonne bread wheat ecus barley ecus maize	0	0	0	0	1	3	1	0	1	2	8	6	6	7	9	4	9	0	12
agriculture department breakdown grain remaining farmer owned grain reserve april mln bushels reserve ii iii iv vi wheat nil nil corn sorghum barley mln cwts note usda totals match total reserve	1	agriculture department breakdown grain remaining farmer owned grain reserve april mln bushels reserve ii iii iv vi wheat nil nil corn sorghum barley mln cwts note usda totals match total reserve	0	0	0	4	5	3	7	7	5	8	7	3	3	2	12	2	17	15	3
commodity futures trading commission cftc april chicago board proposal establish night trading chicago exchange hopes night trading month proposed trading session united extend local time gmt cftc april philadelphia board application trade futures australian dollar york cotton application trade treasury	1	commodity futures trading commission cftc april chicago board proposal establish night trading chicago exchange hopes night trading month proposed trading session united extend local time gmt cftc april philadelphia board application trade futures australian dollar york cotton application trade treasury	1	1	3	1	2	4	3	1	0	1	2	11	10	8	2	1	16	1	18
soviet union rumored morning bought mln tonnes corn export trade sources amount confirmed talk widespread trade gulf cash barge basis levels jumped cents morning rumors expected boost futures prices soviet union bought mln tonnes corn conciliatory gesture ahead trade talks agriculture officials purchases rumored positive factor light soviet trade statement previous purchase satisfied term	1	soviet union rumored morning bought mln tonnes corn export trade sources amount confirmed talk widespread trade gulf cash barge basis levels jumped cents morning rumors expected boost futures prices soviet union bought mln tonnes corn conciliatory gesture ahead trade talks agriculture officials purchases rumored positive factor light soviet trade statement previous purchase satisfied term	0	0	0	0	1	3	1	0	5	2	8	3	3	3	3	2	4	10	2
barley crop condition harvesting expected shortly agricultural marketing board expected mid june excellent weather periods sunshine rain encouraged growth expected lose barley crop extreme dryness yields expected low levels favourable weather continues weeks average yield tonnes hectare national production pct previous season mln tonnes yields reach record tonnes hectare achieved production mln t…	1	barley crop condition harvesting expected shortly agricultural marketing board expected mid june excellent weather periods sunshine rain encouraged growth expected lose barley crop extreme dryness yields expected low levels favourable weather continues weeks average yield tonnes hectare national production pct previous season mln tonnes yields reach record tonnes hectare achieved production mln t…	0	0	0	0	1	3	1	0	1	2	8	6	6	7	9	4	9	0	6
agriculture secretary richard lyng late implement acreage provision decoupling grain crops chance legislation passed crops late lyng told national grain feed association convention lyng support congress chance pilot program passed pending disaster bill late alter crop program sign spring crops closes month lyng predicted change farm bill	1	agriculture secretary richard lyng late implement acreage provision decoupling grain crops chance legislation passed crops late lyng told national grain feed association convention lyng support congress chance pilot program passed pending disaster bill late alter crop program sign spring crops closes month lyng predicted change farm bill	1	0	0	4	5	3	7	7	5	8	7	3	3	3	3	2	2	2	13
agriculture undersecretary dan amstutz united talk soviet union competitiveness wheat prices wheat prices cheap difference competitive cheap amstutz told senate agriculture appropriations hearing amstutz difference opinion moscow washington summer level subsidy offered wheat soviet union wheat price competitive cheap willingness explore issue competitiveness amstutz amstutz united wheat prices mo…	1	agriculture undersecretary dan amstutz united talk soviet union competitiveness wheat prices wheat prices cheap difference competitive cheap amstutz told senate agriculture appropriations hearing amstutz difference opinion moscow washington summer level subsidy offered wheat soviet union wheat price competitive cheap willingness explore issue competitiveness amstutz amstutz united wheat prices mo…	0	0	0	4	5	3	7	7	5	8	7	3	3	3	3	2	4	10	2
posted county prices southern texas counties changed reflect market differential usual terminal market pricing system senior agriculture department official interior grain soybean prices counties based solely texas gulf prior change county prices priced market reflect local market conditions ralph klopfenstein deputy administrator commodity operations usda texas gulf dominant market counties effe…	1	posted county prices southern texas counties changed reflect market differential usual terminal market pricing system senior agriculture department official interior grain soybean prices counties based solely texas gulf prior change county prices priced market reflect local market conditions ralph klopfenstein deputy administrator commodity operations usda texas gulf dominant market counties effe…	0	2	2	4	3	1	0	4	4	5	1	4	5	5	4	13	5	8	5
london markets trade potato soymeal meat futures merge form agricultural futures exchange legal advisers instructed implement amalgamation london potato futures association london meat futures exchange lmfe grain feed trade gafta soya bean meal futures association timetable exchanges consulted agricultural futures exchange secretary bill told reuters objections raised merger markets involved exch…	1	london markets trade potato soymeal meat futures merge form agricultural futures exchange legal advisers instructed implement amalgamation london potato futures association london meat futures exchange lmfe grain feed trade gafta soya bean meal futures association timetable exchanges consulted agricultural futures exchange secretary bill told reuters objections raised merger markets involved exch…	1	1	3	1	2	4	7	7	5	8	7	3	3	8	2	14	16	1	3
grain analysts increase mln tonnes soviet grain imports affect market tuesday market discounted soviet imports partly news month soviet union bought mln tonnes corn rumors reagan administration pushing authority sell soviets wheat export enhancement program supply demand report usda raised estimate soviet grain imports mln tonnes mln business practical purposes drexel burnham analyst dale reflect…	1	grain analysts increase mln tonnes soviet grain imports affect market tuesday market discounted soviet imports partly news month soviet union bought mln tonnes corn rumors reagan administration pushing authority sell soviets wheat export enhancement program supply demand report usda raised estimate soviet grain imports mln tonnes mln business practical purposes drexel burnham analyst dale reflect…	0	0	0	0	1	3	1	0	1	2	8	3	3	3	3	2	4	10	2
senate agriculture committee expected bill tomorrow exempt government conservation regulations farmers row crops committee staff current called law farmers planted highly land lose federal farm program benefits produce row crop land sen edward sponsor measure crop practices erosion practices farmers produced strictly row crops	1	senate agriculture committee expected bill tomorrow exempt government conservation regulations farmers row crops committee staff current called law farmers planted highly land lose federal farm program benefits produce row crop land sen edward sponsor measure crop practices erosion practices farmers produced strictly row crops	1	1	3	4	5	4	7	7	5	8	7	3	3	2	12	2	2	2	13
grain handling rotterdam main grain terminal standstill largest dutch transport union fnv staged strike day running van der managing director graan elevator mij pct grain passing port main terminal action strike technical staff actions support union demands negotiations labour agreement wednesday grain stopped van der strikes continued scale time vessels coming grain rotterdam delays happening ac…	1	grain handling rotterdam main grain terminal standstill largest dutch transport union fnv staged strike day running van der managing director graan elevator mij pct grain passing port main terminal action strike technical staff actions support union demands negotiations labour agreement wednesday grain stopped van der strikes continued scale time vessels coming grain rotterdam delays happening ac…	0	0	0	4	5	3	7	7	5	8	7	3	3	3	3	2	4	10	2
grain traders analysts mln acre sign conservation reserve program scheduled announced usda accept pct acres submitted total enrollment program mln acres sharp increase expected crop corn futures week analysts mln acre sign negative crop corn prices citing trade talk earlier mln acres submitted farmers acres set conservation program definition poor yielding impact total corn production minimal	1	grain traders analysts mln acre sign conservation reserve program scheduled announced usda accept pct acres submitted total enrollment program mln acres sharp increase expected crop corn futures week analysts mln acre sign negative crop corn prices citing trade talk earlier mln acres submitted farmers acres set conservation program definition poor yielding impact total corn production minimal	0	0	0	4	5	0	7	7	5	8	7	3	3	2	12	2	17	15	3
agriculture budget cut additional billion dlrs chairman key house agriculture subcommittee implementation program tightening commodity certificates farms possibilities studied reduce farm spending dan glickman chairman house agriculture subcommittee wheat soybeans feedgrains speaking annual meeting national grain feed association glickman learned week house budget committee agriculture committee …	1	agriculture budget cut additional billion dlrs chairman key house agriculture subcommittee implementation program tightening commodity certificates farms possibilities studied reduce farm spending dan glickman chairman house agriculture subcommittee wheat soybeans feedgrains speaking annual meeting national grain feed association glickman learned week house budget committee agriculture committee …	1	1	1	4	5	2	7	7	5	8	7	3	3	2	3	2	2	2	13
west banking authorities drawn currency scandal surrounding volkswagen ag lt vowg allegations financial community widen banking sources bundesbank currency experts investigating currency fraud volkswagen vw brunswick bundesbank spokesman federal banking supervisory office west berlin press allegations banks positions vw breaching banking regulations earlier month volkswagen incurred potential los…	1	west banking authorities drawn currency scandal surrounding volkswagen ag lt vowg allegations financial community widen banking sources bundesbank currency experts investigating currency fraud volkswagen vw brunswick bundesbank spokesman federal banking supervisory office west berlin press allegations banks positions vw breaching banking regulations earlier month volkswagen incurred potential los…	1	1	3	1	2	6	2	2	7	4	9	8	9	11	11	14	13	12	17
grain trade heading recovery season cargill analyst writing march issue cargill bulletin david rogers commodity marketing division cited gradual rise wheat trade months slow rise wheat prices historic lows wheat trade wheat produced nations grain trade lead activity grain markets rogers grain prices lowest level quarter century real terms demand begun rise producing nations examining expensive pr…	1	grain trade heading recovery season cargill analyst writing march issue cargill bulletin david rogers commodity marketing division cited gradual rise wheat trade months slow rise wheat prices historic lows wheat trade wheat produced nations grain trade lead activity grain markets rogers grain prices lowest level quarter century real terms demand begun rise producing nations examining expensive pr…	0	0	0	4	5	3	7	7	5	8	7	3	3	3	3	1	4	1	11
shipments grain soybeans soviet union week march agriculture export sales report ussr purchased mln tonnes corn delivery fourth ussr grain agreement total shipments ussr grains agreement september amounted tonnes wheat tonnes corn tonnes soybeans	1	shipments grain soybeans soviet union week march agriculture export sales report ussr purchased mln tonnes corn delivery fourth ussr grain agreement total shipments ussr grains agreement september amounted tonnes wheat tonnes corn tonnes soybeans	0	0	0	0	1	3	1	0	1	2	8	6	6	7	9	4	9	0	6
indonesia rejected bank recommendations sweeping reforms farm economy foreign aid donors met billion dlrs grants soft loans agriculture minister affandi written remarks distributed foreign nations met hague argument bank free trade economy view weak bank called indonesia manages largest farm south east asia agricultural growth stagnating rice farming bank report rice production peaked subsidies w…	1	indonesia rejected bank recommendations sweeping reforms farm economy foreign aid donors met billion dlrs grants soft loans agriculture minister affandi written remarks distributed foreign nations met hague argument bank free trade economy view weak bank called indonesia manages largest farm south east asia agricultural growth stagnating rice farming bank report rice production peaked subsidies w…	1	1	3	1	2	4	7	7	5	8	7	8	9	11	11	14	13	11	13
prospects slim summer meeting soviet officials countries enter final bilateral grains agreement agriculture department officials meet approaches meeting delayed february delay endanger grains agreement extends september usda officials difficult pull people meeting july aide usda undersecretary daniel amstutz meeting months ago talks couple months grain industry speculation usda offer moscow wheat…	1	prospects slim summer meeting soviet officials countries enter final bilateral grains agreement agriculture department officials meet approaches meeting delayed february delay endanger grains agreement extends september usda officials difficult pull people meeting july aide usda undersecretary daniel amstutz meeting months ago talks couple months grain industry speculation usda offer moscow wheat…	0	0	0	4	5	3	7	7	5	8	7	3	3	3	3	2	4	10	2
ministry agriculture left estimates french winter cereal sowings campaign barely changed mln hectares compared previous forecast mln compared mln ha winter cereals harvested campaign winter soft wheat sowings mln ha compared previous estimate mln mln ha harvested campaign winter barley plantings forecast mln ha unchanged previous estimate compared mln harvested season ministry hard winter wheat s…	1	ministry agriculture left estimates french winter cereal sowings campaign barely changed mln hectares compared previous forecast mln compared mln ha winter cereals harvested campaign winter soft wheat sowings mln ha compared previous estimate mln mln ha harvested campaign winter barley plantings forecast mln ha unchanged previous estimate compared mln harvested season ministry hard winter wheat s…	0	0	0	0	1	0	5	6	2	7	0	0	0	0	0	0	0	9	7
house agriculture committee meeting draft disaster aid bill controversial provision postponed tuesday committee staff announced bill provision implementing acreage reduction plan wheat winter wheat payments farmers plant winter wheat crop flooding controversy exists provisions bill expanded cut left	1	house agriculture committee meeting draft disaster aid bill controversial provision postponed tuesday committee staff announced bill provision implementing acreage reduction plan wheat winter wheat payments farmers plant winter wheat crop flooding controversy exists provisions bill expanded cut left	0	0	0	4	5	3	7	7	5	8	7	3	3	3	3	11	2	2	13
study grain certificates shortly government accounting office gao certificates cost government pct cash outlays administration industry sources analysis gao agriculture department office management budget suggests certificates cost cash payments gao official told reuters gao preparing certificate study specific request sen chairman senate agriculture committee report focus cost certificates compa…	1	study grain certificates shortly government accounting office gao certificates cost government pct cash outlays administration industry sources analysis gao agriculture department office management budget suggests certificates cost cash payments gao official told reuters gao preparing certificate study specific request sen chairman senate agriculture committee report focus cost certificates compa…	0	0	0	4	5	3	7	7	5	8	7	3	3	2	12	2	17	15	13
grain trade analysts expect sharp drop corn acreage expecting modest decline soybeans agriculture department usda plantings intentions report est gmt average trade guess planted corn acreage mln acres ranging mln mln planted improved incentives usda farmers retire acres corn acres totalled mln pik program introduced average soybean planted acreage mln ranging mln compared mln planted substantial …	1	grain trade analysts expect sharp drop corn acreage expecting modest decline soybeans agriculture department usda plantings intentions report est gmt average trade guess planted corn acreage mln acres ranging mln mln planted improved incentives usda farmers retire acres corn acres totalled mln pik program introduced average soybean planted acreage mln ranging mln compared mln planted substantial …	0	0	0	4	5	0	5	6	5	8	7	3	3	2	12	2	17	15	3
french soft wheat exports european community countries fell pct mln tonnes months season january compared mln period french cereals intervention office onic onic statistics main buyers italy mln mln period west germany tonnes netherlands belgium tonnes british greek imports french soft wheat period ago levels july january britain bought tonnes tonnes onic figures spanish purchases sharply tonnes …	1	french soft wheat exports european community countries fell pct mln tonnes months season january compared mln period french cereals intervention office onic onic statistics main buyers italy mln mln period west germany tonnes netherlands belgium tonnes british greek imports french soft wheat period ago levels july january britain bought tonnes tonnes onic figures spanish purchases sharply tonnes …	0	0	0	0	1	3	1	0	1	2	8	6	6	7	9	4	9	0	6
agriculture department update estimate winter wheat acreage prospective planting report scheduled release est gmt tomorrow march original estimate winter wheat published january survey integrated nationwide survey program probability procedures combine farmers operating selected farmers identified special lists	1	agriculture department update estimate winter wheat acreage prospective planting report scheduled release est gmt tomorrow march original estimate winter wheat published january survey integrated nationwide survey program probability procedures combine farmers operating selected farmers identified special lists	0	0	0	4	5	3	7	7	5	8	7	3	3	3	3	11	12	11	11
agriculture department usda figures highly land enrolled conservation reserve program regarded grain analysts neutral bearish breakdown assess price impact mln acres mln acres accepted corn neutral bearish trade dale drexel burnham lambert usda accepted acres conservation program bids total acres changing estimate planted acreage corn result figures analysts adjust estimates usda release planting…	1	agriculture department usda figures highly land enrolled conservation reserve program regarded grain analysts neutral bearish breakdown assess price impact mln acres mln acres accepted corn neutral bearish trade dale drexel burnham lambert usda accepted acres conservation program bids total acres changing estimate planted acreage corn result figures analysts adjust estimates usda release planting…	0	0	0	4	5	0	7	7	5	8	7	3	3	2	12	2	17	15	3
french cereal exports port fell pct tonnes period february period february trade sources main destinations saudi arabia tonnes barley soviet union wheat italy wheat spain wheat maize china wheat algeria wheat february ships loaded tonnes cereals sources tonnes comprised tonnes wheat china wheat soviet union wheat algeria friday sources estimated tonnes cereals loaded comprising tonnes barley whea…	1	french cereal exports port fell pct tonnes period february period february trade sources main destinations saudi arabia tonnes barley soviet union wheat italy wheat spain wheat maize china wheat algeria wheat february ships loaded tonnes cereals sources tonnes comprised tonnes wheat china wheat soviet union wheat algeria friday sources estimated tonnes cereals loaded comprising tonnes barley whea…	0	0	0	0	1	3	1	0	1	2	8	6	6	7	9	4	9	0	12
fiji welcomed trade ban imposed australian labor unions supporters ousted prime minister renewed pressure strikes shop closures government welcomed decision australian federation lift ban shipments fiji imposed support newly elected government military ban threatened food shortages imported wheat fresh vegetables direct result union decision shipment tons rice wheat australian port government sho…	1	fiji welcomed trade ban imposed australian labor unions supporters ousted prime minister renewed pressure strikes shop closures government welcomed decision australian federation lift ban shipments fiji imposed support newly elected government military ban threatened food shortages imported wheat fresh vegetables direct result union decision shipment tons rice wheat australian port government sho…	1	1	3	4	5	4	7	7	0	1	7	3	8	3	3	14	4	10	12
thai rice exports rose tonnes week october previous week commerce ministry government private exporters shipped tonnes private exporters concluded advance weekly sales tonnes previous week ministry expects tonnes exports week thailand shipped mln tonnes rice mln ago commitments export tonnes	1	thai rice exports rose tonnes week october previous week commerce ministry government private exporters shipped tonnes private exporters concluded advance weekly sales tonnes previous week ministry expects tonnes exports week thailand shipped mln tonnes rice mln ago commitments export tonnes	0	0	0	0	1	3	1	0	1	2	8	6	6	7	9	4	9	0	6
national medical enterprises filed registration statement securities exchange commission covering mln dlrs debt securities proposed offering includes mln dlrs debentures mln dlrs notes company net proceeds offering reduce bank borrowings national medical adding merrill lynch capital markets manage underwriting	1	national medical enterprises filed registration statement securities exchange commission covering mln dlrs debt securities proposed offering includes mln dlrs debentures mln dlrs notes company net proceeds offering reduce bank borrowings national medical adding merrill lynch capital markets manage underwriting	0	2	1	2	0	0	5	6	2	7	0	0	0	0	0	0	6	9	7
winter kill west german winter barley rapeseed average degree season west german grain trader alfred report assess extent damage northern west german crops risk insufficient snow cover soil warm rapidly moisture content improve avoid delays spring field	1	winter kill west german winter barley rapeseed average degree season west german grain trader alfred report assess extent damage northern west german crops risk insufficient snow cover soil warm rapidly moisture content improve avoid delays spring field	0	0	0	4	5	3	7	7	5	8	7	4	5	5	11	11	5	11	11
current prospects grain crop romania favorable agriculture officer belgrade field report report assessment based travel countries march april crop conditions earlier expected extreme dry conditions fall prolonged winter temperatures spring plant development weeks normal spring conditions varied greatly regions report fields period fall receiving supplemental irrigation water pct fields observed a…	1	current prospects grain crop romania favorable agriculture officer belgrade field report report assessment based travel countries march april crop conditions earlier expected extreme dry conditions fall prolonged winter temperatures spring plant development weeks normal spring conditions varied greatly regions report fields period fall receiving supplemental irrigation water pct fields observed a…	0	0	0	4	5	6	7	7	5	8	7	8	9	11	11	11	13	11	11
joint committee maize importers awarded contracts companies supply total tonnes maize delivery october committee spokesman won contract cargo tonnes priced dlrs tonne fob pacific northwest port delivery july continental grain york received shipments totalling tonnes price ranging dlrs tonne taiwan delivery october cargill minnesota shipments totalling tonnes priced dlrs tonne taiwan september sep…	1	joint committee maize importers awarded contracts companies supply total tonnes maize delivery october committee spokesman won contract cargo tonnes priced dlrs tonne fob pacific northwest port delivery july continental grain york received shipments totalling tonnes price ranging dlrs tonne taiwan delivery october cargill minnesota shipments totalling tonnes priced dlrs tonne taiwan september sep…	0	0	0	0	1	3	1	0	1	2	8	6	6	7	9	4	9	0	6
south china province guangdong importing millions tonnes grain overseas china farmers switched grain profitable crops peking review magazine official magazine grain fell mln hectares mln total farmland mln hectares farmers switched cash crops sugarcane oranges fish farming supply major consumer markets hong kong magazine figures magazine china aims pct national farmland grain pct cash crops pct c…	1	south china province guangdong importing millions tonnes grain overseas china farmers switched grain profitable crops peking review magazine official magazine grain fell mln hectares mln total farmland mln hectares farmers switched cash crops sugarcane oranges fish farming supply major consumer markets hong kong magazine figures magazine china aims pct national farmland grain pct cash crops pct c…	0	0	0	4	5	0	7	7	5	8	7	3	3	11	11	11	13	11	11
argentine grain producers reduced estimates total yield soybean crop harvested mid april trade sources growers forecast soybean production season mln tonnes estimate mln tonnes mln tonnes forecast mid february forecast record total production private sources production record mln tonnes pct lower forecast current crop official figure mln tonnes pct estimates growers week discovered empty soybean …	1	argentine grain producers reduced estimates total yield soybean crop harvested mid april trade sources growers forecast soybean production season mln tonnes estimate mln tonnes mln tonnes forecast mid february forecast record total production private sources production record mln tonnes pct lower forecast current crop official figure mln tonnes pct estimates growers week discovered empty soybean …	0	0	0	0	1	0	5	6	2	7	0	6	6	7	9	0	0	9	11
corn acreage drop lowest level acreage reductions pik rank lowest corn plantings united agriculture department officials usda releases official plantings report march agriculture department analysts figures sharp drop acreage low mln acres pct plantings mln acres assuming mln acre drop plantings corn production decrease analysts corn production drop billion bushels billion bushels expected signup…	1	corn acreage drop lowest level acreage reductions pik rank lowest corn plantings united agriculture department officials usda releases official plantings report march agriculture department analysts figures sharp drop acreage low mln acres pct plantings mln acres assuming mln acre drop plantings corn production decrease analysts corn production drop billion bushels billion bushels expected signup…	0	0	0	4	5	0	7	7	5	8	7	3	3	2	12	2	17	15	3
secretary agriculture richard lyng meet representatives major grain exporting companies subject subsidized wheat soviet union discussed aide lyng meeting set est gmt scheduled request exporters aide eep export enhancement program pretty exporters talk agenda aide private industry export officials met lyng farm policies export situation meeting prompt action issue moscow offered export bonus wheat…	1	secretary agriculture richard lyng meet representatives major grain exporting companies subject subsidized wheat soviet union discussed aide lyng meeting set est gmt scheduled request exporters aide eep export enhancement program pretty exporters talk agenda aide private industry export officials met lyng farm policies export situation meeting prompt action issue moscow offered export bonus wheat…	0	0	0	4	5	3	7	7	5	8	7	3	3	3	3	2	4	10	2
national medical enterprises filed registration statement securities exchange commission covering mln dlrs debt securities proposed offering includes mln dlrs debentures mln dlrs notes company net proceeds offering reduce bank borrowings national medical adding merrill lynch capital markets manage underwriting	1	national medical enterprises filed registration statement securities exchange commission covering mln dlrs debt securities proposed offering includes mln dlrs debentures mln dlrs notes company net proceeds offering reduce bank borrowings national medical adding merrill lynch capital markets manage underwriting	0	2	1	2	0	0	5	6	2	7	0	0	0	0	0	0	6	9	7
rep dan glickman kan chairman house agriculture subcommittee wheat soybeans feedgrains introduce bill apply called concept wheat feedgrains producers glickman told reuters measure winter wheat producers feedgrains producers possibility receiving pct income support payments acreage planted bill protect program participants reduced income payments event market prices rose loan rate	1	rep dan glickman kan chairman house agriculture subcommittee wheat soybeans feedgrains introduce bill apply called concept wheat feedgrains producers glickman told reuters measure winter wheat producers feedgrains producers possibility receiving pct income support payments acreage planted bill protect program participants reduced income payments event market prices rose loan rate	0	0	0	4	5	3	7	7	5	8	7	3	3	3	3	2	2	2	13
agriculture department supply demand projections seasons mln bushels comparisons corn acreage mln acres planted harvested yield bu supply mln bu start stock production total includes imports corn cont usage feed ttl exports total stocks farmer ccc stocks free stocks note price dlrs bu corn season sept wheat acreage mln acres planted harvested yield supply mln bu start stcks production total suppl…	1	agriculture department supply demand projections seasons mln bushels comparisons corn acreage mln acres planted harvested yield bu supply mln bu start stock production total includes imports corn cont usage feed ttl exports total stocks farmer ccc stocks free stocks note price dlrs bu corn season sept wheat acreage mln acres planted harvested yield supply mln bu start stcks production total suppl…	0	0	0	0	1	0	5	6	2	7	0	0	0	2	12	0	17	15	3
house agriculture committee meeting draft disaster aid bill expected spark debate lawmakers expand de provision cover feedgrains oppose severely limited congressional sources disaster aid bill stands calls pilot program crop wheat winter wheat crop bill farmers forego planting receive pct deficiency payments administration urged bill expanded feedgrains difficult form provision emerge committee s…	1	house agriculture committee meeting draft disaster aid bill expected spark debate lawmakers expand de provision cover feedgrains oppose severely limited congressional sources disaster aid bill stands calls pilot program crop wheat winter wheat crop bill farmers forego planting receive pct deficiency payments administration urged bill expanded feedgrains difficult form provision emerge committee s…	1	0	0	4	5	3	7	7	5	8	7	3	3	3	3	2	2	2	13
grain traders analysts expect weekly corn export inspection figure wheat soybeans corn export inspection guesses ranged mln bushels week april compared mln inspected week earlier mln ago week soybean export estimates ranged mln bushels versus mln exported week mln export guesses wheat ranged mln bushels compared mln week mln	1	grain traders analysts expect weekly corn export inspection figure wheat soybeans corn export inspection guesses ranged mln bushels week april compared mln inspected week earlier mln ago week soybean export estimates ranged mln bushels versus mln exported week mln export guesses wheat ranged mln bushels compared mln week mln	0	0	0	0	1	0	5	6	2	7	0	0	0	0	0	0	0	9	7
australian wheat plantings forecast fall mln hectares mln sown australian wheat pty preliminary crop forecast reason expect australian production mln tonnes private crops south wales queensland suffered poor yields season fall plantings expected western australia average yields growers sowing wheat rest main reason low western australia estimate poor profit outlook cost credit yield pressures eas…	1	australian wheat plantings forecast fall mln hectares mln sown australian wheat pty preliminary crop forecast reason expect australian production mln tonnes private crops south wales queensland suffered poor yields season fall plantings expected western australia average yields growers sowing wheat rest main reason low western australia estimate poor profit outlook cost credit yield pressures eas…	0	0	0	0	1	3	5	6	2	7	0	6	0	0	0	11	0	11	11
agriculture department announced accepted bids exporters export bonuses cover sales tonnes durum wheat algeria usda bonuses awarded dlrs tonne paid form commodities ccc inventory bonus awards usa tonnes tonnes shipment scheduled june additional tonnes durum wheat algeria export enhancement program	1	agriculture department announced accepted bids exporters export bonuses cover sales tonnes durum wheat algeria usda bonuses awarded dlrs tonne paid form commodities ccc inventory bonus awards usa tonnes tonnes shipment scheduled june additional tonnes durum wheat algeria export enhancement program	0	0	0	0	1	3	1	0	9	10	4	2	2	6	5	12	12	14	15
commodity credit corporation ccc accepted bonus offer exporter sale tonnes barley nigeria agriculture department department bonus awarded dlrs tonne paid form commodities inventory stocks ccc barley scheduled shipment april additional tonnes barley nigeria export enhancement program initiative announced december	1	commodity credit corporation ccc accepted bonus offer exporter sale tonnes barley nigeria agriculture department department bonus awarded dlrs tonne paid form commodities inventory stocks ccc barley scheduled shipment april additional tonnes barley nigeria export enhancement program initiative announced december	0	0	0	4	5	3	1	0	9	10	4	2	2	6	5	12	12	14	15
tonnes corn shipped soviet union week april agriculture export sales report compares tonnes shipped prior week wheat soybean shipments week ussr purchased tonnes corn april delivery fourth ussr grain agreement total shipments ussr grains agreement september amounted tonnes wheat tonnes corn tonnes soybeans	1	tonnes corn shipped soviet union week april agriculture export sales report compares tonnes shipped prior week wheat soybean shipments week ussr purchased tonnes corn april delivery fourth ussr grain agreement total shipments ussr grains agreement september amounted tonnes wheat tonnes corn tonnes soybeans	0	0	0	0	1	3	1	0	1	2	8	6	6	7	9	4	9	0	6
soviet union featured grain exports ec period july march combined total mln tonnes wheat barley destination exports mln tonnes grown cereals authority quoting provisional customs excise figures soviet total comprises tonnes wheat tonnes barley grain traders figures shipments tonnes expect total grain exports ussr season reach mln tonnes comprising mln wheat mln barley	1	soviet union featured grain exports ec period july march combined total mln tonnes wheat barley destination exports mln tonnes grown cereals authority quoting provisional customs excise figures soviet total comprises tonnes wheat tonnes barley grain traders figures shipments tonnes expect total grain exports ussr season reach mln tonnes comprising mln wheat mln barley	0	0	0	0	1	3	1	0	1	2	8	6	6	7	9	4	9	0	6
total tonnes british intervention feed wheat sold tender market grown cereals authority bids amounted tonnes offerings prices paid prevailing intervention feed wheat price stg tonne grain traders tonnage offer stores transport costs european commission tonnes tender	1	total tonnes british intervention feed wheat sold tender market grown cereals authority bids amounted tonnes offerings prices paid prevailing intervention feed wheat price stg tonne grain traders tonnage offer stores transport costs european commission tonnes tender	0	0	0	0	1	3	1	0	1	2	8	6	6	7	9	4	9	0	12
majority senate agriculture committee urged president reagan reverse opposition export subsidies soviet union negotiators purchase mln dlrs american wheat led committee chairman patrick leahy democrat urged reagan step negotiations soviet union providing export subsidies farmers	1	majority senate agriculture committee urged president reagan reverse opposition export subsidies soviet union negotiators purchase mln dlrs american wheat led committee chairman patrick leahy democrat urged reagan step negotiations soviet union providing export subsidies farmers	0	0	0	4	5	3	7	7	5	8	7	3	3	3	3	2	4	10	2
wheat crop threatened plant pests diseases china news agency mln hectares wheat producing land north china warm dry weather allowed insect eggs survive winter agency china ministry agriculture animal called measures including timely supply farmers combat threat	1	wheat crop threatened plant pests diseases china news agency mln hectares wheat producing land north china warm dry weather allowed insect eggs survive winter agency china ministry agriculture animal called measures including timely supply farmers combat threat	0	0	0	4	5	3	7	7	5	8	7	3	3	3	3	11	4	11	11
current soviet vessels carry grain chief factor surge values baltic international freight futures exchange biffex dealers futures soared barrier time spot position market market nervous values baltic freight calculated spot physical rates specific figure soviet sufficient drain tonnage tonnes dw gulf operate trip japan dealers appears chernobyl disaster worse soviet grain harvest reported freight…	1	current soviet vessels carry grain chief factor surge values baltic international freight futures exchange biffex dealers futures soared barrier time spot position market market nervous values baltic freight calculated spot physical rates specific figure soviet sufficient drain tonnage tonnes dw gulf operate trip japan dealers appears chernobyl disaster worse soviet grain harvest reported freight…	0	0	0	4	5	3	7	7	5	8	7	3	3	3	3	2	4	10	2
agriculture secretary richard lyng declined confirm statements farm congressman united offer subsidized wheat soviet union days weeks clarify comments rep pat roberts kansas administration offer export enhancement wheat soviet union lyng official comment lyng comment wheat subsidy offer ussr active consideration usda remarks official announcement	1	agriculture secretary richard lyng declined confirm statements farm congressman united offer subsidized wheat soviet union days weeks clarify comments rep pat roberts kansas administration offer export enhancement wheat soviet union lyng official comment lyng comment wheat subsidy offer ussr active consideration usda remarks official announcement	0	0	0	4	5	3	7	7	5	8	7	3	3	3	3	2	4	10	2
government official decision brazil import maize forecast record harvest affect exports heard brazil decided import maize main customers agriculture livestock secretary miguel private sources exports decision agriculture minister announced yesterday sao paulo brazil argentine maize crop adverse weather summer argentina reduced production brazil bought tonnes argentine maize imported argentina sov…	1	government official decision brazil import maize forecast record harvest affect exports heard brazil decided import maize main customers agriculture livestock secretary miguel private sources exports decision agriculture minister announced yesterday sao paulo brazil argentine maize crop adverse weather summer argentina reduced production brazil bought tonnes argentine maize imported argentina sov…	0	0	0	0	1	3	1	0	1	2	8	6	6	7	9	4	9	0	12
agriculture department projected wheat crop mln tonnes mln tonnes month estimated crop mln tonnes mln month usda projected wheat imports mln tonnes mln tonnes month estimated imports mln tonnes mln month	1	agriculture department projected wheat crop mln tonnes mln tonnes month estimated crop mln tonnes mln month usda projected wheat imports mln tonnes mln tonnes month estimated imports mln tonnes mln month	0	0	0	0	1	0	1	0	1	2	8	6	6	7	9	4	0	0	6
commodity credit corporation approved additional mln dlrs export credit guarantee program gsm sales wheat morocco agriculture department action increases cumulative fiscal program wheat gsm mln dlrs credit terms extended exports program excess eligible credit coverage sales registered exported september department guarantee sales wheat export credit guarantee program gsm decreased mln dlrs mln	1	commodity credit corporation approved additional mln dlrs export credit guarantee program gsm sales wheat morocco agriculture department action increases cumulative fiscal program wheat gsm mln dlrs credit terms extended exports program excess eligible credit coverage sales registered exported september department guarantee sales wheat export credit guarantee program gsm decreased mln dlrs mln	0	0	0	4	5	3	7	7	9	10	4	2	2	6	5	12	12	14	15
agriculture department estimated wheat crop mln tonnes mln tonnes month estimated output mln tonnes mln month canadian coarse grain production projected mln tonnes mln tonnes month production estimated mln tonnes mln month canadian wheat exports forecast mln tonnes mln tonnes month exports estimated mln tonnes mln month	1	agriculture department estimated wheat crop mln tonnes mln tonnes month estimated output mln tonnes mln month canadian coarse grain production projected mln tonnes mln tonnes month production estimated mln tonnes mln month canadian wheat exports forecast mln tonnes mln tonnes month exports estimated mln tonnes mln month	0	0	0	0	1	0	1	0	1	2	8	6	6	7	9	4	0	0	6
secretary george shultz agriculture department decide offer subsidized wheat soviet union shultz told newspaper farm america wheat bonus offer soviet union basically leave agriculture department figure shultz spoke president decision offer subsidized wheat soviet union offer moscow idea arrange food supplies price soviet buy american produced food american buy shultz sell markets meet price shult…	1	secretary george shultz agriculture department decide offer subsidized wheat soviet union shultz told newspaper farm america wheat bonus offer soviet union basically leave agriculture department figure shultz spoke president decision offer subsidized wheat soviet union offer moscow idea arrange food supplies price soviet buy american produced food american buy shultz sell markets meet price shult…	0	0	0	4	5	3	7	7	5	8	7	3	3	3	3	2	4	10	2
agriculture department forecast european wheat crop mln tonnes mln tonnes month estimated output mln tonnes mln month coarse grain production projected mln tonnes mln tonnes month crop estimated mln tonnes mln month wheat exports forecast mln tonnes mln tonnes month exports estimated mln tonnes month	1	agriculture department forecast european wheat crop mln tonnes mln tonnes month estimated output mln tonnes mln month coarse grain production projected mln tonnes mln tonnes month crop estimated mln tonnes mln month wheat exports forecast mln tonnes mln tonnes month exports estimated mln tonnes month	0	0	0	0	1	0	1	0	1	2	8	6	6	7	9	4	9	0	6
storage record grain crop result losses mln tonnes agriculture ministry spokesman ministry spokesman speaking brasilia told reuters believed mln tonnes estimated crop mln tonnes lost normal loss inevitable harvesting stem storage brazil storage capacity mln tonnes sufficient crop storage capacity badly distributed sao paulo parana rio grande sul pct capacity responsible pct production biggest con…	1	storage record grain crop result losses mln tonnes agriculture ministry spokesman ministry spokesman speaking brasilia told reuters believed mln tonnes estimated crop mln tonnes lost normal loss inevitable harvesting stem storage brazil storage capacity mln tonnes sufficient crop storage capacity badly distributed sao paulo parana rio grande sul pct capacity responsible pct production biggest con…	0	0	0	0	1	3	1	0	1	2	8	6	6	7	9	11	9	11	11
controversial study farm subsidies conducted paris based organisation economic cooperation development oecd japan agriculture subsidies dairy farmers benefit commodity producers subsidies study released oecd objections countries provided reuters officials countries condition identified oecd study level farm subsidies measure called producer subsidy equivalent study dairy products amount aid farme…	1	controversial study farm subsidies conducted paris based organisation economic cooperation development oecd japan agriculture subsidies dairy farmers benefit commodity producers subsidies study released oecd objections countries provided reuters officials countries condition identified oecd study level farm subsidies measure called producer subsidy equivalent study dairy products amount aid farme…	1	1	3	4	5	4	7	8	3	6	3	8	9	11	11	6	13	13	8
ghana lifted ban rice maize imports crop caused unusually dry weather official ghana news agency reported secretary finance economic planning announcement night accepting tonnes rice worth mln dlrs japanese food aid programme lifting ban imposed earlier government concern lower average rainfall southern ghana implications major harvest rain major cereal growing south ministry agriculture predicte…	1	ghana lifted ban rice maize imports crop caused unusually dry weather official ghana news agency reported secretary finance economic planning announcement night accepting tonnes rice worth mln dlrs japanese food aid programme lifting ban imposed earlier government concern lower average rainfall southern ghana implications major harvest rain major cereal growing south ministry agriculture predicte…	0	0	0	0	1	3	1	0	5	8	7	8	9	11	11	11	13	11	11
implementation pilot program wheat feedgrains promoted chairman key house agriculture subcommittee cut farm costs simultaneously farmers option planting decisions budget driven farm policy dan glickman chairman subcommittee wheat soybeans feed grains cut costs hurt farmer plan properly glickman announced week plans introduce bill wheat feedgrains aide glickman introduced week glickman program far…	1	implementation pilot program wheat feedgrains promoted chairman key house agriculture subcommittee cut farm costs simultaneously farmers option planting decisions budget driven farm policy dan glickman chairman subcommittee wheat soybeans feed grains cut costs hurt farmer plan properly glickman announced week plans introduce bill wheat feedgrains aide glickman introduced week glickman program far…	1	1	3	4	5	3	7	7	5	8	7	3	3	2	12	2	2	2	13
commodity credit corporation ccc accepted bid export bonus cover sale tons barley israel agriculture department department barley delivery april bonus awarded dlrs ton bonus cargill paid form commodities ccc stocks additional tons barley israel export enhancement program announced june	1	commodity credit corporation ccc accepted bid export bonus cover sale tons barley israel agriculture department department barley delivery april bonus awarded dlrs ton bonus cargill paid form commodities ccc stocks additional tons barley israel export enhancement program announced june	0	0	0	4	5	3	7	7	9	10	4	2	2	6	5	12	12	14	15
american express plan sell stake shearson lehman brothers believed prelude public offering shares brokerage unit analysts american express earlier understanding nippon life insurance japan sell pct shearson mln dlrs statement triggered rise brokerage stocks investors speculated possibility investment brokerage industry japanese concerns stocks brokerage firms climbed response nippon stake firm an…	1	american express plan sell stake shearson lehman brothers believed prelude public offering shares brokerage unit analysts american express earlier understanding nippon life insurance japan sell pct shearson mln dlrs statement triggered rise brokerage stocks investors speculated possibility investment brokerage industry japanese concerns stocks brokerage firms climbed response nippon stake firm an…	1	1	3	1	2	6	2	2	7	4	10	8	9	11	8	10	8	12	8
lt securities statement acted broker unsolicited individual named securities exchange commission civil suit alleging insider trading violations filled david israeli allegedly traded inside vaskevitch head merrill lynch lt mer london mergers office vaskevitch suspended merrill cooperating probe knowledge reason transactions based inside	1	lt securities statement acted broker unsolicited individual named securities exchange commission civil suit alleging insider trading violations filled david israeli allegedly traded inside vaskevitch head merrill lynch lt mer london mergers office vaskevitch suspended merrill cooperating probe knowledge reason transactions based inside	1	2	2	3	2	6	2	2	7	4	9	7	1	1	8	10	3	12	1
commodity credit corporation ccc switched mln dlrs credit guarantees mexico cover purchases wheat agriculture department credit guarantees earmarked sales dry edible beans rice action reduces guarantee lines authorized dry edible beans mln dlrs mln dlrs rice mln increases coverage wheat sales mln mln dlrs	1	commodity credit corporation ccc switched mln dlrs credit guarantees mexico cover purchases wheat agriculture department credit guarantees earmarked sales dry edible beans rice action reduces guarantee lines authorized dry edible beans mln dlrs mln dlrs rice mln increases coverage wheat sales mln mln dlrs	0	0	0	4	5	0	5	6	9	10	4	2	2	6	5	12	12	14	15
commodity credit ccc accepted bid export bonus cover sale tonnes wheat west african countries agriculture department northern spring wheat shipment june bonus dlrs tonne peavey company paid form commodities ccc inventory additional tonnes wheat west african countries export enhancement program initiative announced october	1	commodity credit ccc accepted bid export bonus cover sale tonnes wheat west african countries agriculture department northern spring wheat shipment june bonus dlrs tonne peavey company paid form commodities ccc inventory additional tonnes wheat west african countries export enhancement program initiative announced october	0	0	0	4	5	3	7	7	9	10	4	2	2	6	5	12	12	14	15
enrollment agriculture fourth conservation signup expected announced tomorrow usda officials figure total enrollment enrollment range mln acres usda conservation specialists total enrollment conservation program mln acres producers submitted bids enter mln acres program hertz administrator agricultural stabilization conservation service congressional hearing yesterday bids accepted hertz enrollme…	1	enrollment agriculture fourth conservation signup expected announced tomorrow usda officials figure total enrollment enrollment range mln acres usda conservation specialists total enrollment conservation program mln acres producers submitted bids enter mln acres program hertz administrator agricultural stabilization conservation service congressional hearing yesterday bids accepted hertz enrollme…	0	0	0	4	5	0	7	7	5	8	7	3	3	2	12	2	17	15	3
pct alberta northeastern british columbia crops week ahead average alberta wheat pool report hard red spring wheat accounts acreage mln estimated changed oats acreage mln unchanged barley mln rapeseed planting estimated mln expected pct south south central alberta lacked moisture growth prospects northern range soil moisture north central wheat pool	1	pct alberta northeastern british columbia crops week ahead average alberta wheat pool report hard red spring wheat accounts acreage mln estimated changed oats acreage mln unchanged barley mln rapeseed planting estimated mln expected pct south south central alberta lacked moisture growth prospects northern range soil moisture north central wheat pool	0	0	0	4	5	0	5	6	2	7	0	0	0	0	0	0	0	9	7
major grain producing countries reduce global surpluses australian farm policy proposals wheat organizations australian proposals starting discussions feel developing agenda discussions grain trade president national association wheat growers nawg chairman wheat associates letter agriculture secretary richard lyng trade representative clayton yeutter future discussions international wheat trade c…	1	major grain producing countries reduce global surpluses australian farm policy proposals wheat organizations australian proposals starting discussions feel developing agenda discussions grain trade president national association wheat growers nawg chairman wheat associates letter agriculture secretary richard lyng trade representative clayton yeutter future discussions international wheat trade c…	1	0	3	4	5	3	7	7	5	8	7	3	3	3	3	2	4	10	17
rice corn farmers receive largest payments government subsidies calculated planted acre agriculture department usda government outlays rice farmers expected reach dlrs acre planted corn dlrs planted acre government outlays deficiency payments price support loans acre basis cotton payments reach dlrs wheat dlrs sorghum dlrs barley dlrs oats dlrs usda usda estimates farm subsidies reach billion dlr…	1	rice corn farmers receive largest payments government subsidies calculated planted acre agriculture department usda government outlays rice farmers expected reach dlrs acre planted corn dlrs planted acre government outlays deficiency payments price support loans acre basis cotton payments reach dlrs wheat dlrs sorghum dlrs barley dlrs oats dlrs usda usda estimates farm subsidies reach billion dlr…	0	0	1	4	5	2	7	7	5	8	7	3	3	2	12	2	17	15	3
agriculture department narrowed cents price differential louisiana gulf price corn posted country prices pegged gulf price usda officials change effective april posted county prices cents region robert sindt assistant deputy administrator agricultural stabilization conservation service trade sources usda adjusted differentials gulf prices weakness days compared rest country sindt louisiana gulf c…	1	agriculture department narrowed cents price differential louisiana gulf price corn posted country prices pegged gulf price usda officials change effective april posted county prices cents region robert sindt assistant deputy administrator agricultural stabilization conservation service trade sources usda adjusted differentials gulf prices weakness days compared rest country sindt louisiana gulf c…	0	2	2	4	5	1	7	7	5	8	7	3	3	2	12	2	17	15	3
acres highly farmland submitted department agriculture conservation reserve program trade guesses mln neutral impact grain soybean prices monday grain traders farmers enrolled acres corn base acreage conservation program advantage corn bonus rental payment offered usda underpin crop futures crop corn prices firmed earlier week ideas sign program traders poor yielding acres set result modest decre…	1	acres highly farmland submitted department agriculture conservation reserve program trade guesses mln neutral impact grain soybean prices monday grain traders farmers enrolled acres corn base acreage conservation program advantage corn bonus rental payment offered usda underpin crop futures crop corn prices firmed earlier week ideas sign program traders poor yielding acres set result modest decre…	0	0	0	4	5	3	7	7	5	8	7	3	3	2	12	2	17	15	3
agriculture secretary richard lyng japan offer share rice market exporters visits country month interview reuters lyng reagan administration tokyo remove quotas beef citrus exports lyng plans japan april tokyo liberalize rice market urge sharing rice market usda secretary share japanese rice market request cent improvement reagan administration rejected petition rice industry seeking relief japan…	1	agriculture secretary richard lyng japan offer share rice market exporters visits country month interview reuters lyng reagan administration tokyo remove quotas beef citrus exports lyng plans japan april tokyo liberalize rice market urge sharing rice market usda secretary share japanese rice market request cent improvement reagan administration rejected petition rice industry seeking relief japan…	1	1	3	1	2	4	3	1	0	1	10	10	8	13	13	5	8	17	4
vietnam army grow food ease shortages meet economic recovery goals set army newspaper dan monitored harder care rice vegetables crops unusually hot weather paper mln strong regular army contributed pct mln tonne food output north vietnam set food target mln tonnes	1	vietnam army grow food ease shortages meet economic recovery goals set army newspaper dan monitored harder care rice vegetables crops unusually hot weather paper mln strong regular army contributed pct mln tonne food output north vietnam set food target mln tonnes	0	0	0	0	1	0	5	6	2	7	0	0	0	0	0	11	0	11	11
agriculture department projections supply demand report comparisons mln tonnes total grain total supply trade usage based export estimate wheat start production imports feed total domes exports stocks note imports exports balance differing marketing grains transit reporting coarse grain start stcks production imports feed total domes exports stocks note imports exports balance differing marketing…	1	agriculture department projections supply demand report comparisons mln tonnes total grain total supply trade usage based export estimate wheat start production imports feed total domes exports stocks note imports exports balance differing marketing grains transit reporting coarse grain start stcks production imports feed total domes exports stocks note imports exports balance differing marketing…	0	0	0	0	1	3	4	3	6	0	5	5	4	2	12	3	0	15	0
farmers operations cap federal payments add billion dlrs cost agricultural programs accounting office gao estimate trend farm continue adding mln dlrs annually program costs gao senior associate director brian crowley cumulative costs period approach billion dlrs persons agriculture department payment rolls crowley told house agriculture subcommittee wheat soybeans feedgrains	1	farmers operations cap federal payments add billion dlrs cost agricultural programs accounting office gao estimate trend farm continue adding mln dlrs annually program costs gao senior associate director brian crowley cumulative costs period approach billion dlrs persons agriculture department payment rolls crowley told house agriculture subcommittee wheat soybeans feedgrains	0	1	1	4	5	2	7	7	5	8	7	3	3	9	7	3	6	2	13
western agricultural moscow evidence rumours chernobyl nuclear disaster worse soviet grain reported current soviet ships carry grain helped prompt rumours markets diplomats reports press heard comments officials official media initially slow reporting accident kremlin leader mikhail campaign gradually details land nuclear plant varying degrees grow industrial crops grain	1	western agricultural moscow evidence rumours chernobyl nuclear disaster worse soviet grain reported current soviet ships carry grain helped prompt rumours markets diplomats reports press heard comments officials official media initially slow reporting accident kremlin leader mikhail campaign gradually details land nuclear plant varying degrees grow industrial crops grain	0	0	0	4	5	3	7	7	5	8	7	3	3	3	3	11	4	10	2
pier imports board declared split common stock cents preferred stock declared regular quarterly dividend cents share pre split shares common stock outstanding pier declared pct annual dividend increase post split common shares split effected form pct stock dividend classes company shareholder approval required increase authorized shares common stock mln mln approval increase authorized shares pre…	1	pier imports board declared split common stock cents preferred stock declared regular quarterly dividend cents share pre split shares common stock outstanding pier declared pct annual dividend increase post split common shares split effected form pct stock dividend classes company shareholder approval required increase authorized shares common stock mln mln approval increase authorized shares pre…	0	2	2	3	3	0	5	6	2	7	0	8	9	11	8	6	6	12	8
senate week proposed legislation serve rod broad initiatives change farm policy senate house passed bill wheat feedgrains farmers receive pct income support payments flooding prevented prevent planting crops senate staff told reuters pending bill extend life national commission dairy policy sen boschwitz minn intends offer amendment bills suspend minimum planting requirement wheat feedgrain cotto…	1	senate week proposed legislation serve rod broad initiatives change farm policy senate house passed bill wheat feedgrains farmers receive pct income support payments flooding prevented prevent planting crops senate staff told reuters pending bill extend life national commission dairy policy sen boschwitz minn intends offer amendment bills suspend minimum planting requirement wheat feedgrain cotto…	1	1	3	4	5	4	7	7	5	8	7	3	3	2	3	2	2	2	13
agriculture department announced prevailing market prices rice loan rate basis previous prices grain kernels cts lb medium grain kernels cts lb short grain kernels cts lb broken kernels cts lb repayment rate crop warehouse farm stored rice loans price pct loan rate dlrs cwt prices remain week prices announced earlier warranted usda	1	agriculture department announced prevailing market prices rice loan rate basis previous prices grain kernels cts lb medium grain kernels cts lb short grain kernels cts lb broken kernels cts lb repayment rate crop warehouse farm stored rice loans price pct loan rate dlrs cwt prices remain week prices announced earlier warranted usda	0	2	2	4	5	1	7	7	5	8	7	3	3	5	4	13	5	8	5
rainfall days eased threat drought south china province guangdong china news agency pct rice fields ready planted pct rice fields island hectares farmland planted cash crops including sugar cane peanuts soybeans ha provincial government increased investment grain effective measures combat natural agency details	1	rainfall days eased threat drought south china province guangdong china news agency pct rice fields ready planted pct rice fields island hectares farmland planted cash crops including sugar cane peanuts soybeans ha provincial government increased investment grain effective measures combat natural agency details	0	0	0	4	5	6	7	7	5	8	7	8	9	11	11	11	13	11	11
commodity credit corporation ccc transferred mln dlrs credit guarantees earmarked sales corn mln dlrs sales oilseeds increase coverage sales poultry meat iraq agriculture department department action request trade organization grains guarantee sales corn reduced mln dlrs mln oilseeds mln dlrs guarantee sales frozen poultry increased mln dlrs mln dlrs usda	1	commodity credit corporation ccc transferred mln dlrs credit guarantees earmarked sales corn mln dlrs sales oilseeds increase coverage sales poultry meat iraq agriculture department department action request trade organization grains guarantee sales corn reduced mln dlrs mln oilseeds mln dlrs guarantee sales frozen poultry increased mln dlrs mln dlrs usda	0	0	0	4	5	0	5	6	2	7	0	0	0	0	0	0	6	9	7
commodity credit corporation ccc announced mln dlrs credit guarantees earmarked cover sales dry edible beans honduras switched cover sales white corn agriculture department department action reduces coverage sales dry edible beans dlrs mln dlrs sales white corn sales credit guarantee registered shipped september	1	commodity credit corporation ccc announced mln dlrs credit guarantees earmarked cover sales dry edible beans honduras switched cover sales white corn agriculture department department action reduces coverage sales dry edible beans dlrs mln dlrs sales white corn sales credit guarantee registered shipped september	0	0	0	4	5	3	7	7	9	10	4	2	2	6	5	12	12	14	15
industries raised mln dlrs holders company warrants program expired february issued shares holders exercised options exchange warrants dlrs share common stock pct warrants exercised proceeds mln dlrs sale notes provide term financing heavy system construction la refinery	1	industries raised mln dlrs holders company warrants program expired february issued shares holders exercised options exchange warrants dlrs share common stock pct warrants exercised proceeds mln dlrs sale notes provide term financing heavy system construction la refinery	0	2	1	2	0	0	5	6	2	7	0	0	0	0	0	0	6	12	7
feedgrains council surprised disappointed canadian import decision imports corn materially canadian corn producers council spokesman time attempting liberalize trade multilateral negotiations country stands gain reduction agricultural trade barriers threaten process pressures protectionism council president finding strain canadian trading relationship damage future feedgrains support free trade n…	1	feedgrains council surprised disappointed canadian import decision imports corn materially canadian corn producers council spokesman time attempting liberalize trade multilateral negotiations country stands gain reduction agricultural trade barriers threaten process pressures protectionism council president finding strain canadian trading relationship damage future feedgrains support free trade n…	1	1	3	1	2	4	3	1	5	8	2	11	10	8	2	1	16	1	16
french operators requested licences export tonnes maize tonnes barley tonnes soft bread wheat tonnes feed wheat european community tender traders rebates requested ranged european currency units tonne maize ecus tonne barley ecus bread wheat rebates requested feed wheat ecus	1	french operators requested licences export tonnes maize tonnes barley tonnes soft bread wheat tonnes feed wheat european community tender traders rebates requested ranged european currency units tonne maize ecus tonne barley ecus bread wheat rebates requested feed wheat ecus	0	0	0	0	1	3	1	0	1	2	8	6	6	7	9	4	9	0	12
senate agriculture committee voted limit county loan rate differentials starting crop budget deficit reduction package panel approved measures trigger larger corn wheat acreage reduction requirements increase farmer held reserve storage payments reduce potential milk support price cut require advance deficiency payments producers major crops proposal require imported tropical oils food products f…	1	senate agriculture committee voted limit county loan rate differentials starting crop budget deficit reduction package panel approved measures trigger larger corn wheat acreage reduction requirements increase farmer held reserve storage payments reduce potential milk support price cut require advance deficiency payments producers major crops proposal require imported tropical oils food products f…	1	1	0	4	5	3	7	7	5	8	7	3	3	2	12	2	2	2	13
agriculture department forecast soviet wheat crop mln tonnes mln tonnes month crop mln tonnes mln tonnes month soviet coarse grain production estimated mln tonnes mln tonnes month production projected mln tonnes mln tonnes month ussr wheat imports forecast mln tonnes mln tonnes month imports mln tonnes mln tonnes month usda estimated soviet coarse grain imports mln tonnes mln tonnes month imports…	1	agriculture department forecast soviet wheat crop mln tonnes mln tonnes month crop mln tonnes mln tonnes month soviet coarse grain production estimated mln tonnes mln tonnes month production projected mln tonnes mln tonnes month ussr wheat imports forecast mln tonnes mln tonnes month imports mln tonnes mln tonnes month usda estimated soviet coarse grain imports mln tonnes mln tonnes month imports…	0	0	0	0	1	3	1	0	1	2	8	6	6	7	9	4	9	0	6
dart corp offered buy supermarkets corp dlrs share cash earlier supermarkets unsolicited party offer analysts estimated billion dlrs based mln shares outstanding kidder peabody told dart affiliate prepared advance mln dlrs subordinated	1	dart corp offered buy supermarkets corp dlrs share cash earlier supermarkets unsolicited party offer analysts estimated billion dlrs based mln shares outstanding kidder peabody told dart affiliate prepared advance mln dlrs subordinated	0	2	1	2	0	0	5	6	2	7	0	0	0	0	0	0	6	9	7
french agricultural minister francois guillaume warned france reject proposed reforms european community ec cereals sugar oilseeds sectors disrupt markets ec proposals intervention period lower monthly premiums cereals increase financial burden sugar producers result lower real prices producers told farmers word france reject technical adjustments discussion simply reply negative bad reforms guil…	1	french agricultural minister francois guillaume warned france reject proposed reforms european community ec cereals sugar oilseeds sectors disrupt markets ec proposals intervention period lower monthly premiums cereals increase financial burden sugar producers result lower real prices producers told farmers word france reject technical adjustments discussion simply reply negative bad reforms guil…	1	1	3	4	5	4	7	8	3	6	3	1	11	4	14	9	11	6	14
trade sources confirmed earlier tentative reports bangladesh bought tonnes optional origin feed wheat late week weekend continental grain united won contract supply wheat ec europe supply tonnes rate dlrs tonne april supply remaining tonnes rate dlrs april	1	trade sources confirmed earlier tentative reports bangladesh bought tonnes optional origin feed wheat late week weekend continental grain united won contract supply wheat ec europe supply tonnes rate dlrs tonne april supply remaining tonnes rate dlrs april	0	0	0	0	1	3	1	0	1	2	8	6	6	7	9	4	9	0	6
iran launched fresh offensive north baghdad days thrust iraq southern gulf war front iranian news agency irna received london offensive northeast border miles northeast iraqi capital heavy losses iraqi forces fresh iranian irna iran reported major gains southern front major iraqi port city forces defensive	1	iran launched fresh offensive north baghdad days thrust iraq southern gulf war front iranian news agency irna received london offensive northeast border miles northeast iraqi capital heavy losses iraqi forces fresh iranian irna iran reported major gains southern front major iraqi port city forces defensive	0	2	2	3	4	6	2	2	7	9	11	9	12	10	10	15	10	3	10
usda posted county prices increased pik roll activity pull corn government stockpiles jump free supplies pressuring terminal corn basis values cash grain dealers processors dropped spot chicago corn basis bids cents covering april week river corn basis bids cif gulf corn values lower surge pik roll pressured corn futures settling cents bushel dlrs contract low dlrs lower prices slowed country mov…	1	usda posted county prices increased pik roll activity pull corn government stockpiles jump free supplies pressuring terminal corn basis values cash grain dealers processors dropped spot chicago corn basis bids cents covering april week river corn basis bids cif gulf corn values lower surge pik roll pressured corn futures settling cents bushel dlrs contract low dlrs lower prices slowed country mov…	0	0	0	4	5	3	7	7	5	8	7	3	3	2	12	2	17	15	3
senate agriculture committee expected proposals limit adjustments county loan rate differentials trigger larger corn wheat acreage reduction requirements senate staff budget saving proposal drafted chairman patrick leahy vt limit adjustments county loan rate differentials pct national average loan rate starting crops plan agriculture secretary increase acreage reduction requirement corn amount ge…	1	senate agriculture committee expected proposals limit adjustments county loan rate differentials trigger larger corn wheat acreage reduction requirements senate staff budget saving proposal drafted chairman patrick leahy vt limit adjustments county loan rate differentials pct national average loan rate starting crops plan agriculture secretary increase acreage reduction requirement corn amount ge…	0	0	0	4	5	3	7	7	5	8	7	3	3	2	12	2	17	15	3
emergency action distribute european community ec food surpluses poor proved successful ec executive commission propose permanent scheme commission spokesman tonnes food ec stores january agriculture ministers approved scheme march commission figures food including tonnes cereals tonnes sugar tonnes beef tonnes butter distributed scheme approved emergency measure poor people unusually cold winter…	1	emergency action distribute european community ec food surpluses poor proved successful ec executive commission propose permanent scheme commission spokesman tonnes food ec stores january agriculture ministers approved scheme march commission figures food including tonnes cereals tonnes sugar tonnes beef tonnes butter distributed scheme approved emergency measure poor people unusually cold winter…	0	0	0	0	1	3	1	8	3	6	3	1	11	4	14	9	11	6	14
winter wheat survive impact cold late april polish institute varieties winter wheat sown poland survive ground temperatures low minus degrees spokesman told reuters earlier thin protective snow february air temperatures minus harmful wheat damaged cold march april night	1	winter wheat survive impact cold late april polish institute varieties winter wheat sown poland survive ground temperatures low minus degrees spokesman told reuters earlier thin protective snow february air temperatures minus harmful wheat damaged cold march april night	0	0	0	4	5	3	7	7	5	8	7	3	3	3	3	11	4	11	11
heavy rains fell main grain growing week yesterday trade sources rains fell heaviest week volume buenos aires province cordoba la pampa santa fe provinces rainfall totalled mm buenos aires heaviest western sectors province mm la pampa mm cordoba mm santa fe rainfall lighter provinces rainfall totalled mm mm san luis mm mm mm mm growers rains damaged crops maize sunflower crops suffered harvesting…	1	heavy rains fell main grain growing week yesterday trade sources rains fell heaviest week volume buenos aires province cordoba la pampa santa fe provinces rainfall totalled mm buenos aires heaviest western sectors province mm la pampa mm cordoba mm santa fe rainfall lighter provinces rainfall totalled mm mm san luis mm mm mm mm growers rains damaged crops maize sunflower crops suffered harvesting…	0	0	0	0	1	0	5	6	1	2	8	6	6	7	9	11	9	11	11
european community offer argentina compensation loss maize sorghum exports spain accession ec ec sources offer week geneva headquarters agreement tariffs trade gatt involve products cereals details argentine exports sorghum spain fell tonnes maize sales fell tonnes official ec statistics sources agreement ec guarantees special access spanish market mln tonnes ec maize tonnes sorghum details accor…	1	european community offer argentina compensation loss maize sorghum exports spain accession ec ec sources offer week geneva headquarters agreement tariffs trade gatt involve products cereals details argentine exports sorghum spain fell tonnes maize sales fell tonnes official ec statistics sources agreement ec guarantees special access spanish market mln tonnes ec maize tonnes sorghum details accor…	0	0	0	0	1	3	1	8	3	6	3	1	11	4	14	9	11	6	14
widespread rains aided crop development province northwest crop producing region receiving precipitation agriculture weekly crop report rains low soil moisture reserves reserves rated report plantings virtually complete province advanced fields stands cereal crops southwest pct fields subsequent stage oilseeds northwest region pct emerged regions pct emerged	1	widespread rains aided crop development province northwest crop producing region receiving precipitation agriculture weekly crop report rains low soil moisture reserves reserves rated report plantings virtually complete province advanced fields stands cereal crops southwest pct fields subsequent stage oilseeds northwest region pct emerged regions pct emerged	0	0	0	4	5	6	7	7	5	8	7	8	9	11	11	11	13	11	11
bids european community market tenders wheat barley ec farm ministers agree farm price package trade sources failure farm ministers week agreement bids tender export subsidies traders bids uncertainty remains trader permanent damage export prospects avoided reached situation time traders buyers lessening impact delay poland south korea market feed wheat offered intervention grain special tenders …	1	bids european community market tenders wheat barley ec farm ministers agree farm price package trade sources failure farm ministers week agreement bids tender export subsidies traders bids uncertainty remains trader permanent damage export prospects avoided reached situation time traders buyers lessening impact delay poland south korea market feed wheat offered intervention grain special tenders …	1	0	3	4	5	3	7	8	3	6	3	1	11	4	14	9	11	6	12
agriculture department proposing tighter federal standards setting allowable limits insect grain shipments standards establishing equal live insects shipments food grains feed grains oilseeds revising definition equal insects grain establishing lower levels level set live insects representative grams insects final level set live insects representative revising definition grade adding limit live d…	1	agriculture department proposing tighter federal standards setting allowable limits insect grain shipments standards establishing equal live insects shipments food grains feed grains oilseeds revising definition equal insects grain establishing lower levels level set live insects representative grams insects final level set live insects representative revising definition grade adding limit live d…	0	0	0	4	5	3	7	7	5	8	7	3	3	3	3	11	4	11	11
agriculture department private exporters reported tonnes corn unknown destinations switched soviet union corn delivery marketing fourth ussr term grain supply agreement marketing september sales corn ussr delivery fourth agreement october total tonnes agreement sales totaled tonnes tonnes wheat tonnes corn	1	agriculture department private exporters reported tonnes corn unknown destinations switched soviet union corn delivery marketing fourth ussr term grain supply agreement marketing september sales corn ussr delivery fourth agreement october total tonnes agreement sales totaled tonnes tonnes wheat tonnes corn	0	0	0	0	1	3	1	0	1	2	8	6	6	7	9	4	9	0	6
commodity credit corporation ccc accepted bid export bonus cover sale tonnes semolina egypt agriculture department department bonus dlrs tonne international multifoods corp bonus paid form commodities ccc stocks semolina shipment june additional tonnes semolina egypt export enhancement program initiative announced august	1	commodity credit corporation ccc accepted bid export bonus cover sale tonnes semolina egypt agriculture department department bonus dlrs tonne international multifoods corp bonus paid form commodities ccc stocks semolina shipment june additional tonnes semolina egypt export enhancement program initiative announced august	0	0	0	4	5	3	7	7	9	10	4	2	2	6	5	12	12	14	15
commodity credit accepted bid export bonus cover sale tonnes hard red winter wheat zaire agriculture department wheat scheduled shipment june department bonus continental grain dlrs tonne paid form commodities ccc stocks additional tonnes wheat zaire export enhancement program initiative announced october	1	commodity credit accepted bid export bonus cover sale tonnes hard red winter wheat zaire agriculture department wheat scheduled shipment june department bonus continental grain dlrs tonne paid form commodities ccc stocks additional tonnes wheat zaire export enhancement program initiative announced october	0	0	0	4	5	3	7	7	9	10	4	2	2	6	5	12	12	14	15
efforts governments control wheat surpluses cutting support prices met partial success international wheat council iwc monthly report faster achieved policy reducing price employed united iwc survey support prices main wheat exporters argentina australia canada ec countries australia argentina highly dependent wheat shipments export income reducing production policy cutting wheat production lead …	1	efforts governments control wheat surpluses cutting support prices met partial success international wheat council iwc monthly report faster achieved policy reducing price employed united iwc survey support prices main wheat exporters argentina australia canada ec countries australia argentina highly dependent wheat shipments export income reducing production policy cutting wheat production lead …	0	0	0	4	5	3	7	7	5	8	7	3	3	3	3	12	4	10	12
residents central oklahoma returned homes weekend week heavy rains severe flooding left dead caused mln dlrs damage officials people homes rains flooding week civil defense officials set threatened flooding red rivers closed residents returned damaged homes farmers expected record wheat crop largest losses decades henry thursday declared flooding emergency central oklahoma expected president reag…	1	residents central oklahoma returned homes weekend week heavy rains severe flooding left dead caused mln dlrs damage officials people homes rains flooding week civil defense officials set threatened flooding red rivers closed residents returned damaged homes farmers expected record wheat crop largest losses decades henry thursday declared flooding emergency central oklahoma expected president reag…	0	0	0	4	5	0	7	7	5	8	7	3	3	14	15	11	2	11	11
wheat rapeseed crops east china suffered considerable damage frost spell unusually cold weather late march china daily average temperatures days march east china degrees centigrade average snow fell anhui henan rice sowing difficult heavy snow central south north leaving farmland spring sowing paper paper rainfall days march south normal heavy rain fell sunday guangdong dry season start flood sea…	1	wheat rapeseed crops east china suffered considerable damage frost spell unusually cold weather late march china daily average temperatures days march east china degrees centigrade average snow fell anhui henan rice sowing difficult heavy snow central south north leaving farmland spring sowing paper paper rainfall days march south normal heavy rain fell sunday guangdong dry season start flood sea…	0	0	0	4	5	3	7	7	5	8	7	8	9	11	11	11	13	11	11
french exporters estimated tonnes french soft wheat sold china delivery july june tonnes exported china july february tonnes shipped month amount april france sold tonnes soft wheat china customs figures exporters fear china contract france offered mln tonnes soft wheat export enhancement program january purchases initiative	1	french exporters estimated tonnes french soft wheat sold china delivery july june tonnes exported china july february tonnes shipped month amount april france sold tonnes soft wheat china customs figures exporters fear china contract france offered mln tonnes soft wheat export enhancement program january purchases initiative	0	0	0	0	1	3	1	0	1	2	8	6	6	7	9	4	9	0	6
dry weather covered european crop week march southwestern france southern italy greece joint agricultural weather facility agriculture commerce departments international weather crop agency mixed rain snow covered greece winter grains england france northern italy remained grains break dormancy march winter grains eastern europe break dormancy april showers improved irrigation supplies winter whe…	1	dry weather covered european crop week march southwestern france southern italy greece joint agricultural weather facility agriculture commerce departments international weather crop agency mixed rain snow covered greece winter grains england france northern italy remained grains break dormancy march winter grains eastern europe break dormancy april showers improved irrigation supplies winter whe…	0	0	0	4	5	3	7	7	5	8	7	3	3	11	11	11	13	11	11
canadian wheat board advised federal government sharply cut initial prices paid farmers wheat oats barley crop august board spokesman spokesman declined size recommended price drops news western canadian grain growers lower pretty talking economic worthwhile farmers crop farm leaders economists estimated board recommend cuts pct initial prices farmers receive initial payment grain delivered eleva…	1	canadian wheat board advised federal government sharply cut initial prices paid farmers wheat oats barley crop august board spokesman spokesman declined size recommended price drops news western canadian grain growers lower pretty talking economic worthwhile farmers crop farm leaders economists estimated board recommend cuts pct initial prices farmers receive initial payment grain delivered eleva…	0	0	0	4	5	3	7	7	5	8	7	3	3	2	3	2	17	11	16
agriculture widening louisiana gulf differentials affect county posted prices yellow corn ten usda official counties iowa counties gulf price corn illinois indiana tennessee kentucky missouri mississippi arkansas alabama louisiana deputy director commodity operations division usda usda night notified grain industry effective gulf differentials price interior corn widened sliding scale basis cts d…	1	agriculture widening louisiana gulf differentials affect county posted prices yellow corn ten usda official counties iowa counties gulf price corn illinois indiana tennessee kentucky missouri mississippi arkansas alabama louisiana deputy director commodity operations division usda usda night notified grain industry effective gulf differentials price interior corn widened sliding scale basis cts d…	0	2	2	4	5	1	7	7	5	8	7	3	3	2	12	2	17	15	3
prolonged dry spell damaged hectares rice corn plantations provinces central southern philippines agriculture officials tonnes agricultural produce estimated mln pesos lost lack rainfall warned severe drought prevailing conditions continued month agriculture secretary carlos hoped losses offset expected increase output productive dry spell hectares rice representing production loss tonnes valued …	1	prolonged dry spell damaged hectares rice corn plantations provinces central southern philippines agriculture officials tonnes agricultural produce estimated mln pesos lost lack rainfall warned severe drought prevailing conditions continued month agriculture secretary carlos hoped losses offset expected increase output productive dry spell hectares rice representing production loss tonnes valued …	0	0	0	0	1	3	1	0	1	2	8	6	6	7	9	11	17	11	11
drought reduction estimated wheat crop mln tonnes mln harvest agriculture officer peking field report report dated march imports season projected mln tonnes mln tonnes current estimate imports united estimated mln tonnes compared tonnes estimated major wheat producing obtaining planted total planted estimated hectares dry fall report compensate normal precipitation irrigation increased fertilizer…	1	drought reduction estimated wheat crop mln tonnes mln harvest agriculture officer peking field report report dated march imports season projected mln tonnes mln tonnes current estimate imports united estimated mln tonnes compared tonnes estimated major wheat producing obtaining planted total planted estimated hectares dry fall report compensate normal precipitation irrigation increased fertilizer…	0	0	0	0	1	3	1	0	1	2	8	6	6	7	9	4	9	0	6
exporters opportunity sell tonnes wheat west african countries export enhancement program agriculture department addition ivory coast ghana countries gabon declared eligible initiative export sales subsidized commodities inventory commodity credit corporation ccc west african countries purchased tonnes wheat announced export bonus programs	1	exporters opportunity sell tonnes wheat west african countries export enhancement program agriculture department addition ivory coast ghana countries gabon declared eligible initiative export sales subsidized commodities inventory commodity credit corporation ccc west african countries purchased tonnes wheat announced export bonus programs	0	0	0	4	5	3	1	7	9	10	4	2	2	6	5	12	12	14	15
argentine grain producers adjusted yield estimates coarse grain crop downward week yesterday heavy rains march april trade sources sunflower maize sorghum production estimates reduced warm dry weather allowed return harvesting showers fell weekend producers feared spell prolonged intense rain damage crops badly hit season rains middle week reached average millimetres buenos aires province mm cord…	1	argentine grain producers adjusted yield estimates coarse grain crop downward week yesterday heavy rains march april trade sources sunflower maize sorghum production estimates reduced warm dry weather allowed return harvesting showers fell weekend producers feared spell prolonged intense rain damage crops badly hit season rains middle week reached average millimetres buenos aires province mm cord…	0	0	0	0	1	0	5	6	2	7	0	0	0	0	0	0	0	9	7
industry aid protection review body industries assistance commission hold month inquiry australian wheat industry primary industry minister john report assistance industry nature duration extent aid statement inquiry step setting marketing arrangements apply june underwriting pricing provisions wheat marketing expire broad ranging reference examination aspects wheat marketing system inquiry requi…	1	industry aid protection review body industries assistance commission hold month inquiry australian wheat industry primary industry minister john report assistance industry nature duration extent aid statement inquiry step setting marketing arrangements apply june underwriting pricing provisions wheat marketing expire broad ranging reference examination aspects wheat marketing system inquiry requi…	0	0	0	4	5	3	7	7	5	8	7	3	3	3	3	12	4	10	12
statement yesterday secretary george shultz met wheat growers agricultural products competitively priced recognized soviet market prices market levels grain trade industry officials comments subsidized wheat sales ussr negative action response query position selling subsidized wheat moscow shultz told leaders national association wheat growers prices competitive trade soviet union largest grain i…	1	statement yesterday secretary george shultz met wheat growers agricultural products competitively priced recognized soviet market prices market levels grain trade industry officials comments subsidized wheat sales ussr negative action response query position selling subsidized wheat moscow shultz told leaders national association wheat growers prices competitive trade soviet union largest grain i…	0	0	0	4	5	3	7	7	5	8	7	3	3	3	3	2	4	10	2
reagan cabinet level economic policy council scheduled meet friday issues status agricultural legislation administration officials officials discussion agriculture department wheat export subsidy soviet union agenda matters agenda brought council officials grain trade officials speculated usda wheat export enhancement offer moscow usda officials matter active consideration usda congress package l…	1	reagan cabinet level economic policy council scheduled meet friday issues status agricultural legislation administration officials officials discussion agriculture department wheat export subsidy soviet union agenda matters agenda brought council officials grain trade officials speculated usda wheat export enhancement offer moscow usda officials matter active consideration usda congress package l…	1	1	3	4	5	3	7	7	5	8	7	3	3	3	3	2	4	10	2
commodity credit corporation ccc accepted bid export bonus cover sale tonnes semolina egypt agriculture department department semolina shipment april october bonus awarded dlrs tonne bonus international multifoods corp paid exporter form commodities ccc stocks department additional tonnes semolina egypt export enhancement program initiative announced august	1	commodity credit corporation ccc accepted bid export bonus cover sale tonnes semolina egypt agriculture department department semolina shipment april october bonus awarded dlrs tonne bonus international multifoods corp paid exporter form commodities ccc stocks department additional tonnes semolina egypt export enhancement program initiative announced august	0	0	0	4	5	3	7	7	9	10	4	2	2	6	5	12	12	14	15
intergrated generics biopharmaceutics subsidiary negotiations manufacturer distributor generic equivalents brand prescription drugs company successful agreement distribute anti anxiety drug market potential mln dlrs integrated anonymity time finalization agreement expected weeks company	1	intergrated generics biopharmaceutics subsidiary negotiations manufacturer distributor generic equivalents brand prescription drugs company successful agreement distribute anti anxiety drug market potential mln dlrs integrated anonymity time finalization agreement expected weeks company	0	2	2	3	3	0	5	6	2	7	0	0	0	0	0	0	6	12	7
soviet union purchasing crop wheat grain shipment offered subsidy wheat executive major grain export company lower prices desire delay purchases condition winter spring crops crop wheat attractive george hoffman director commodity analysis pillsbury company pillsbury assuming soviets offered subsidy subsidy respond hoffman told reuters interview agribusiness education conference constraints subsi…	1	soviet union purchasing crop wheat grain shipment offered subsidy wheat executive major grain export company lower prices desire delay purchases condition winter spring crops crop wheat attractive george hoffman director commodity analysis pillsbury company pillsbury assuming soviets offered subsidy subsidy respond hoffman told reuters interview agribusiness education conference constraints subsi…	0	0	0	4	5	3	7	7	5	8	7	3	3	3	3	2	4	10	2
private exporters reported sales tonnes corn soviet union delivery season term grain supply agreement department sales reported delivery agreement october sales wheat corn ussr delivery fourth agreement totaled tonnes tonnes wheat tonnes corn addition sales soybeans totaled tonnes	1	private exporters reported sales tonnes corn soviet union delivery season term grain supply agreement department sales reported delivery agreement october sales wheat corn ussr delivery fourth agreement totaled tonnes tonnes wheat tonnes corn addition sales soybeans totaled tonnes	0	0	0	0	1	3	1	0	1	2	8	6	6	7	9	4	9	0	6
hot dry weather caused deterioration saskatchewan crops saskatchewan wheat weekly crop report rain southwest west central northeast regions regions expected rain crops fair condition crops rated fair poor wheat durum oats barley crops pct headed pct milk stage winter wheat pct milk stage pct pct southern grain belt hit winds tuesday damage reported	1	hot dry weather caused deterioration saskatchewan crops saskatchewan wheat weekly crop report rain southwest west central northeast regions regions expected rain crops fair condition crops rated fair poor wheat durum oats barley crops pct headed pct milk stage winter wheat pct milk stage pct pct southern grain belt hit winds tuesday damage reported	0	0	0	4	5	3	7	7	5	8	7	8	9	11	11	11	13	11	11
exporters opportunity sell additional tonnes durum wheat algeria export enhancement program eep agriculture department department sales subsidized commodities commodity credit corporation ccc inventory subsidy enable exports compete commercial prices algerian market algeria purchased tonnes durum wheat previous export enhancement initiative announced november details initiative including invitati…	1	exporters opportunity sell additional tonnes durum wheat algeria export enhancement program eep agriculture department department sales subsidized commodities commodity credit corporation ccc inventory subsidy enable exports compete commercial prices algerian market algeria purchased tonnes durum wheat previous export enhancement initiative announced november details initiative including invitati…	0	0	0	4	5	3	7	7	9	10	4	2	2	6	5	12	12	14	15
commodity credit corporation ccc switched mln dlrs wheat credit guarantees jordan export credit guarantee program intermediate export credit guarantee program agriculture department switch reduces total gsm guarantees current fiscal mln dlrs credit terms extended export sales intermediate export credit guarantee program gsm excess sales registered exports completed september department	1	commodity credit corporation ccc switched mln dlrs wheat credit guarantees jordan export credit guarantee program intermediate export credit guarantee program agriculture department switch reduces total gsm guarantees current fiscal mln dlrs credit terms extended export sales intermediate export credit guarantee program gsm excess sales registered exports completed september department	0	0	0	4	5	3	7	7	9	10	4	2	2	6	5	12	12	14	15
specialty retailing continues pay woolworth store chain income rose pct fourth consecutive profit increases york based retailer founded ago income rose mln dlrs dlrs share compared profit mln dlrs share revenues rose billion compared prior billion fourth quarter company reported profits rose pct mln dlrs dlrs share compared fourth quarter mln dlrs share revenues rose billion billion dlrs roy wool…	1	specialty retailing continues pay woolworth store chain income rose pct fourth consecutive profit increases york based retailer founded ago income rose mln dlrs dlrs share compared profit mln dlrs share revenues rose billion compared prior billion fourth quarter company reported profits rose pct mln dlrs dlrs share compared fourth quarter mln dlrs share revenues rose billion billion dlrs roy wool…	0	2	1	2	0	2	4	3	6	0	5	5	4	9	7	3	6	16	0
china short sorghum sixth successive production costs low profits discourage farmers growing china daily business weekly sorghum output calendar mln tonnes pct level prices free market rose january yuan pct january sorghum acreage pct lower sorghum accounts pct raw materials details	1	china short sorghum sixth successive production costs low profits discourage farmers growing china daily business weekly sorghum output calendar mln tonnes pct level prices free market rose january yuan pct january sorghum acreage pct lower sorghum accounts pct raw materials details	0	0	0	0	1	0	5	6	2	7	7	8	9	11	11	6	13	13	8
french operators requested licences export tonnes free market maize tonnes barley tonnes feed wheat ec tender trade sources maize rebates requested range european currency units tonne barley ecus feed wheat ecus	1	french operators requested licences export tonnes free market maize tonnes barley tonnes feed wheat ec tender trade sources maize rebates requested range european currency units tonne barley ecus feed wheat ecus	0	0	0	0	1	3	1	0	1	2	8	6	6	7	9	4	9	0	12
australia wheat export sales providing specific quality grades meet buyer requirements australian wheat board awb awb customers increasingly quality demanding strict adherence contractual quality board royal commission grain storage handling transport specific current categories australia commission identify saving costs boosting efficiency grain handling system australia rely quality retain whea…	1	australia wheat export sales providing specific quality grades meet buyer requirements australian wheat board awb awb customers increasingly quality demanding strict adherence contractual quality board royal commission grain storage handling transport specific current categories australia commission identify saving costs boosting efficiency grain handling system australia rely quality retain whea…	0	0	0	4	5	3	7	7	5	8	7	3	3	3	3	11	4	10	12
rain india damaged tonnes grain intended human consumption storage transportation food civil supplies minister told parliament comparative figures government owned food corporation india decided grains cattle feed total mln tonnes food grains warehouses governments build warehouses avoid damage grains	1	rain india damaged tonnes grain intended human consumption storage transportation food civil supplies minister told parliament comparative figures government owned food corporation india decided grains cattle feed total mln tonnes food grains warehouses governments build warehouses avoid damage grains	0	0	0	0	1	3	1	0	1	2	8	6	6	7	9	4	9	0	6
japanese feed starch makers actively bought corn week basis july september shipment view bullish freight rates active inquiries soviet union trade sources makers buying pct requirements estimated mln tonnes month shipment period belief growing freight rates decline sharply current levels sluggish summer season soviet continuing months april source sources japanese trading houses covering total to…	1	japanese feed starch makers actively bought corn week basis july september shipment view bullish freight rates active inquiries soviet union trade sources makers buying pct requirements estimated mln tonnes month shipment period belief growing freight rates decline sharply current levels sluggish summer season soviet continuing months april source sources japanese trading houses covering total to…	0	0	0	0	1	3	1	0	1	2	8	6	6	7	9	4	9	0	6
french cereals intervention board onic tender wednesday tonnes soft wheat pakistan french food aid programme onic official grain shipped june july onic hold tender june tonnes soft wheat european community food aid programme shipment bulk august official	1	french cereals intervention board onic tender wednesday tonnes soft wheat pakistan french food aid programme onic official grain shipped june july onic hold tender june tonnes soft wheat european community food aid programme shipment bulk august official	0	0	0	0	1	3	1	0	1	2	8	6	6	7	9	4	9	0	12
marketing loan wheat feedgrains soybeans surplus production situation extremely costly sen boschwitz minn support marketing loan told house agriculture subcommittee wheat soybeans feedgrains boschwitz original supporters marketing loan cotton rice focused support decoupling legislation bill market loan grains soybeans encourage production yielding expensive current cotton rice marketing loans inc…	1	marketing loan wheat feedgrains soybeans surplus production situation extremely costly sen boschwitz minn support marketing loan told house agriculture subcommittee wheat soybeans feedgrains boschwitz original supporters marketing loan cotton rice focused support decoupling legislation bill market loan grains soybeans encourage production yielding expensive current cotton rice marketing loans inc…	0	0	0	4	5	3	7	7	5	8	7	3	3	2	12	2	2	2	13
national association wheat growers nawg board directors scheduled meet secretary george schultz undersecretary allen wallis current role farm trade policy association nawg president jim miller statement organization secretary schultz exports hold agriculture degree farmers dependent favorable department trade policies remain profitable foreign policy decisions department severely hampered efforts…	1	national association wheat growers nawg board directors scheduled meet secretary george schultz undersecretary allen wallis current role farm trade policy association nawg president jim miller statement organization secretary schultz exports hold agriculture degree farmers dependent favorable department trade policies remain profitable foreign policy decisions department severely hampered efforts…	1	1	3	4	5	4	7	7	5	8	7	3	3	3	3	2	4	10	2
australia lose valuable wheat markets lack availability plantings coming season reduced australian wheat board awb chairman clinton predictions pct decrease plantings prove true australia supply wheat valuable markets statement predictions awb spokesman industry feeling farmers hard hit low prices rising costs cut plantings sharply wheat sowing plantings cut pct farmers facing enormous financial …	1	australia lose valuable wheat markets lack availability plantings coming season reduced australian wheat board awb chairman clinton predictions pct decrease plantings prove true australia supply wheat valuable markets statement predictions awb spokesman industry feeling farmers hard hit low prices rising costs cut plantings sharply wheat sowing plantings cut pct farmers facing enormous financial …	0	0	0	4	5	3	7	7	5	8	7	3	3	3	3	11	4	10	12
reagan administration continues debate offer subsidized wheat soviet union assurances soviets buy wheat subsidy offer senior agriculture department official active debate export enhancement offer soviets thomas kay administrator foreign agriculture service told reuters assurances soviets buy offered wheat subsidy plan kay called reports offer imminent premature reagan cabinet level economic polic…	1	reagan administration continues debate offer subsidized wheat soviet union assurances soviets buy wheat subsidy offer senior agriculture department official active debate export enhancement offer soviets thomas kay administrator foreign agriculture service told reuters assurances soviets buy offered wheat subsidy plan kay called reports offer imminent premature reagan cabinet level economic polic…	0	0	0	4	5	3	7	7	5	8	7	3	3	3	3	2	4	10	2
sen boschwitz minn intended offer legislation producers wheat feedgrains cotton rice receive pct deficiency payments planted boschwitz told senate agriculture committee applying called provision crops supported reagan administration save mln dlrs including mln dlrs corn payments mln dlrs wheat mln dlrs cotton minnesota senator offer bill senate floor conference committee house representatives eve…	1	sen boschwitz minn intended offer legislation producers wheat feedgrains cotton rice receive pct deficiency payments planted boschwitz told senate agriculture committee applying called provision crops supported reagan administration save mln dlrs including mln dlrs corn payments mln dlrs wheat mln dlrs cotton minnesota senator offer bill senate floor conference committee house representatives eve…	0	0	0	4	5	0	7	7	5	8	7	3	3	2	3	2	2	2	13
syria bought tonnes french soft wheat traders payment guarantees shipping contract ahead syria bought tonnes soft french wheat campaign tonnes exported month country bought tonnes ec soft wheat days ago dlrs tonne fob	1	syria bought tonnes french soft wheat traders payment guarantees shipping contract ahead syria bought tonnes soft french wheat campaign tonnes exported month country bought tonnes ec soft wheat days ago dlrs tonne fob	0	0	0	0	1	3	1	0	1	2	8	6	6	7	9	4	9	0	12
intensive technology concept grain production floor ussr grain production agriculture officer moscow field report report quoting broadcast radio moscow intensive technology grain production bad fall mln tonnes grain production reach mln tonnes agriculture department forecasts ussr crop mln tonnes realized soviet grain harvest exceeded mln tonnes largest crop mln tonnes harvested usda data	1	intensive technology concept grain production floor ussr grain production agriculture officer moscow field report report quoting broadcast radio moscow intensive technology grain production bad fall mln tonnes grain production reach mln tonnes agriculture department forecasts ussr crop mln tonnes realized soviet grain harvest exceeded mln tonnes largest crop mln tonnes harvested usda data	0	0	0	0	1	3	1	0	1	2	8	6	6	7	9	4	9	0	6
proposed securities offerings filed securities exchange commission allied supermarkets lt offering mln dlrs senior subordinated discount debentures mln dlrs subordinated debentures drexel burnham lambert donaldson lufkin jenrette securities corp integrated resources lt offering mln dlrs senior notes mln dlrs april mln dlrs april mln dlrs april drexel burnham lambert	1	proposed securities offerings filed securities exchange commission allied supermarkets lt offering mln dlrs senior subordinated discount debentures mln dlrs subordinated debentures drexel burnham lambert donaldson lufkin jenrette securities corp integrated resources lt offering mln dlrs senior notes mln dlrs april mln dlrs april mln dlrs april drexel burnham lambert	0	2	1	2	0	0	5	6	2	7	0	0	0	0	0	0	6	9	7
agriculture department estimated wheat crop mln tonnes mln tonnes month estimated output mln tonnes mln month canadian coarse grain production projected mln tonnes mln tonnes month production estimated mln tonnes mln month canadian wheat exports forecast mln tonnes mln tonnes month exports estimated mln tonnes mln month	1	agriculture department estimated wheat crop mln tonnes mln tonnes month estimated output mln tonnes mln month canadian coarse grain production projected mln tonnes mln tonnes month production estimated mln tonnes mln month canadian wheat exports forecast mln tonnes mln tonnes month exports estimated mln tonnes mln month	0	0	0	0	1	0	1	0	1	2	8	6	6	7	9	4	0	0	6
exported tonnes wheat tonnes barley days march grown cereals authority quoting provisional customs excise figures brought combined wheat barley exports season started july mln tonnes mln exported period total comprises mln tonnes wheat mln barley compared mln mln ago	1	exported tonnes wheat tonnes barley days march grown cereals authority quoting provisional customs excise figures brought combined wheat barley exports season started july mln tonnes mln exported period total comprises mln tonnes wheat mln barley compared mln mln ago	0	0	0	0	1	3	1	0	1	2	8	6	6	7	9	4	9	0	6
zambian government plans follow increase producer price maize hike retail price maize meal official ruling party december pct increase consumer price refined maize meal zambian staple led food people died price increase president kenneth kaunda pressure international monetary fund imf reduce subsidy bill producer price rise dlrs dlrs bag accompanied retail price increase government spend subsidie…	1	zambian government plans follow increase producer price maize hike retail price maize meal official ruling party december pct increase consumer price refined maize meal zambian staple led food people died price increase president kenneth kaunda pressure international monetary fund imf reduce subsidy bill producer price rise dlrs dlrs bag accompanied retail price increase government spend subsidie…	0	2	2	3	3	1	0	4	4	5	1	4	5	5	4	13	13	8	12
agriculture department forecast wheat crop mln tonnes mln tonnes month estimated output mln tonnes mln month australian wheat exports forecast mln tonnes mln tonnes month exports estimated mln tonnes mln month	1	agriculture department forecast wheat crop mln tonnes mln tonnes month estimated output mln tonnes mln month australian wheat exports forecast mln tonnes mln tonnes month exports estimated mln tonnes mln month	0	0	0	0	1	0	1	0	1	2	8	6	6	7	9	4	0	0	6
cash grain dealers reported slow country movement corn soybeans midwest corn sales pik roll activity earlier week drying dealers usda adjust posted county price gulf account barge freight rates corn sales flowing current plan weeks hoped corn soybean basis values continued drop illinois river strong barge freight rates toledo chicago elevators loading corn boats shipping season supporting spot ba…	1	cash grain dealers reported slow country movement corn soybeans midwest corn sales pik roll activity earlier week drying dealers usda adjust posted county price gulf account barge freight rates corn sales flowing current plan weeks hoped corn soybean basis values continued drop illinois river strong barge freight rates toledo chicago elevators loading corn boats shipping season supporting spot ba…	0	0	0	4	5	3	7	7	5	8	7	3	3	2	12	2	17	15	3
agriculture department breakdown supply distribution classes mln bushels comparisons hard winter start stocks production ttl supply domestic exports total stocks note season june includes imports hard spring start stocks production ttl supply domestic exports total stocks note season june includes imports soft red start stocks production ttl supply domestic exports total stocks note season june i…	1	agriculture department breakdown supply distribution classes mln bushels comparisons hard winter start stocks production ttl supply domestic exports total stocks note season june includes imports hard spring start stocks production ttl supply domestic exports total stocks note season june includes imports soft red start stocks production ttl supply domestic exports total stocks note season june i…	0	0	0	0	1	3	5	6	2	7	0	0	0	2	12	0	0	15	3
thailand week seek clarification decision freeze rice export prices january april commerce minister told reporters seek meeting ambassador william brown determine failed set weekly rice prices rising prices period policy weakening rice prices announcing highly subsidised export prices lower quoted thai traders thai officials weekly rice prices announced agriculture department unchanged weeks apri…	1	thailand week seek clarification decision freeze rice export prices january april commerce minister told reporters seek meeting ambassador william brown determine failed set weekly rice prices rising prices period policy weakening rice prices announcing highly subsidised export prices lower quoted thai traders thai officials weekly rice prices announced agriculture department unchanged weeks apri…	0	0	0	0	1	3	1	0	1	2	8	8	9	11	11	6	13	13	8
harvested mln tonnes rice paddy crops previous official news agency yesterday diplomats estimates harvest mln tonnes planned expand planting mln mln hectares boost rice paddy output mln tonnes calendar mln tonnes paddy produce mln tonnes milled rice mln tonnes minimum mln people	1	harvested mln tonnes rice paddy crops previous official news agency yesterday diplomats estimates harvest mln tonnes planned expand planting mln mln hectares boost rice paddy output mln tonnes calendar mln tonnes paddy produce mln tonnes milled rice mln tonnes minimum mln people	0	0	0	0	1	0	5	6	1	2	8	6	6	7	9	0	0	9	6
traded volumes grain potato futures february previous month pigmeat pig cash settlement futures official figures combined wheat barley futures trade declined tonnes mln january fell mln stg mln grain feed trade association gafta figures total tonnes registered main crop potato futures february valued mln stg versus mln stg january soymeal futures trade totalled tonnes january declined mln stg mln…	1	traded volumes grain potato futures february previous month pigmeat pig cash settlement futures official figures combined wheat barley futures trade declined tonnes mln january fell mln stg mln grain feed trade association gafta figures total tonnes registered main crop potato futures february valued mln stg versus mln stg january soymeal futures trade totalled tonnes january declined mln stg mln…	0	0	0	0	1	0	5	6	2	7	0	0	0	0	0	0	0	9	7
european community authorised export tonnes barley yesterday bringing cumulative total weekly tenders series started june mln tonnes close mln licence ago period traders bids wheat rejected total mln tonnes mln licence ago tonnes french maize granted export moved total tonnes tender february facilities maize previous weekly grain export series	1	european community authorised export tonnes barley yesterday bringing cumulative total weekly tenders series started june mln tonnes close mln licence ago period traders bids wheat rejected total mln tonnes mln licence ago tonnes french maize granted export moved total tonnes tender february facilities maize previous weekly grain export series	0	0	0	0	1	3	1	0	1	2	8	6	6	7	9	4	9	0	12
week remaining feedgrains program agriculture department officials final signup exceed level pct enrollment basic acreage reduction program total close pct agricultural stabilization conservation service ascs officials pct farmers expected sign paid land diversion program signup period feedgrains program officially close business day march usda release official signup report april official usda p…	1	week remaining feedgrains program agriculture department officials final signup exceed level pct enrollment basic acreage reduction program total close pct agricultural stabilization conservation service ascs officials pct farmers expected sign paid land diversion program signup period feedgrains program officially close business day march usda release official signup report april official usda p…	0	0	0	4	5	3	7	7	5	8	7	3	3	2	12	2	17	15	3
western resource based economy hurt international market forces ottawa finance minister michael wilson international energy price price copper price wheat wilson told house finance committee pressure oil companies wheat farmers depressed commodity prices wilson recognized market forces country wilson committee spending estimates released earlier week government region citing billion dlrs aid west…	1	western resource based economy hurt international market forces ottawa finance minister michael wilson international energy price price copper price wheat wilson told house finance committee pressure oil companies wheat farmers depressed commodity prices wilson recognized market forces country wilson committee spending estimates released earlier week government region citing billion dlrs aid west…	1	1	3	4	5	4	7	7	5	8	2	11	10	8	2	14	2	2	13
heightened fears el nino returning peru intensity approaching disaster weather caused widespread damage drought agriculture officer lima field report continued heavy rains northern coastal flooding major rivers led increased concern report dated march official sources el nino weak moderate intensity el nino phenomenon involving shift winds waters pacific usda report el nino experienced negative i…	1	heightened fears el nino returning peru intensity approaching disaster weather caused widespread damage drought agriculture officer lima field report continued heavy rains northern coastal flooding major rivers led increased concern report dated march official sources el nino weak moderate intensity el nino phenomenon involving shift winds waters pacific usda report el nino experienced negative i…	0	0	0	4	5	3	7	7	5	8	7	8	9	11	11	11	13	11	11
light scattered showers covered winter wheat north china plain week march wheat breaking dormancy central northern joint agricultural weather facility agriculture commerce departments international weather crop summary agency southern winter wheat stage normal february temperatures north china plain caused winter grains break dormancy south moderate heavy rains southern anhui eastern hebei fujian…	1	light scattered showers covered winter wheat north china plain week march wheat breaking dormancy central northern joint agricultural weather facility agriculture commerce departments international weather crop summary agency southern winter wheat stage normal february temperatures north china plain caused winter grains break dormancy south moderate heavy rains southern anhui eastern hebei fujian…	0	0	0	4	5	3	7	7	5	8	7	3	3	3	3	11	4	11	11
commodity credit corporation ccc accepted bids export bonuses tonnes durum wheat algeria agriculture department department bonuses awarded averaged dlrs tonne paid exporters form commodities ccc inventories bonuses usa department wheat shipment additional tonnes durum wheat algeria export enhancement program initiative announced march	1	commodity credit corporation ccc accepted bids export bonuses tonnes durum wheat algeria agriculture department department bonuses awarded averaged dlrs tonne paid exporters form commodities ccc inventories bonuses usa department wheat shipment additional tonnes durum wheat algeria export enhancement program initiative announced march	0	0	0	4	5	3	7	7	9	10	4	2	2	6	5	12	12	14	15
agriculture department lowered ascs terminal prices low protein hard red winter hard red spring wheat locations senior usda official usda reduced price hard red winter wheat kansas city texas cents minneapolis cents st louis cents ralph klopfenstein deputy administrator commodity operations agricultural stabilization conservation service department lowered terminal price hard red spring wheat min…	1	agriculture department lowered ascs terminal prices low protein hard red winter hard red spring wheat locations senior usda official usda reduced price hard red winter wheat kansas city texas cents minneapolis cents st louis cents ralph klopfenstein deputy administrator commodity operations agricultural stabilization conservation service department lowered terminal price hard red spring wheat min…	0	0	0	4	5	3	7	7	5	8	7	3	3	3	3	12	12	14	15
brazil happy existing structure bank advisory committee commercial bank debt finance minister dilson funaro banks pct representation committee holding pct debt banks adding fair european japanese banks committee played role noting reactions japanese european banks funaro told journalists brazil adopt approach involving separate discussions regions debtor treated basis principle apply creditors ce…	1	brazil happy existing structure bank advisory committee commercial bank debt finance minister dilson funaro banks pct representation committee holding pct debt banks adding fair european japanese banks committee played role noting reactions japanese european banks funaro told journalists brazil adopt approach involving separate discussions regions debtor treated basis principle apply creditors ce…	1	1	1	2	0	2	4	3	6	0	5	5	4	9	7	14	14	16	0
soviet farmers sown spring crops mln hectares pct land april compared mln ha april grains maize sown mln ha compared mln time spring sowing slow start planting weeks schedule winter unusually cold western agricultural experts crop heavy winterkill difficult reach grain target mln tonnes crop mln	1	soviet farmers sown spring crops mln hectares pct land april compared mln ha april grains maize sown mln ha compared mln time spring sowing slow start planting weeks schedule winter unusually cold western agricultural experts crop heavy winterkill difficult reach grain target mln tonnes crop mln	0	0	0	0	1	0	5	6	2	7	0	0	0	0	0	11	0	9	11
salomon elected gerald vice president chief financial officer succeeding ray golden left january joined lt salomon named position chief financial officer salomon brothers financial division people joined salomon salomon merger acquisitions head salomon capital commitments committee role retains	1	salomon elected gerald vice president chief financial officer succeeding ray golden left january joined lt salomon named position chief financial officer salomon brothers financial division people joined salomon salomon merger acquisitions head salomon capital commitments committee role retains	1	1	3	1	2	6	2	2	7	4	9	7	1	1	8	10	3	12	1
thailand exported tonnes rice week february previous week commerce ministry government private exporters shipped tonnes private exporters concluded advance weekly sales tonnes previous week thailand exported tonnes rice january february tonnes period commitments export tonnes	1	thailand exported tonnes rice week february previous week commerce ministry government private exporters shipped tonnes private exporters concluded advance weekly sales tonnes previous week thailand exported tonnes rice january february tonnes period commitments export tonnes	0	0	0	0	1	3	1	0	1	2	8	6	6	7	9	4	9	0	6
cpc international officials sale european corn wet milling business remove mln dlrs debt liabilities balance sheet told analysts deal expected close september cash flow operations reduce total debt debt totaled billion dlrs officials company current plans sell north american corn wet milling businesses capital spending budgeted mln dlrs mln dlrs officials told analysts	1	cpc international officials sale european corn wet milling business remove mln dlrs debt liabilities balance sheet told analysts deal expected close september cash flow operations reduce total debt debt totaled billion dlrs officials company current plans sell north american corn wet milling businesses capital spending budgeted mln dlrs mln dlrs officials told analysts	0	1	1	2	0	0	5	6	2	7	0	0	0	0	0	0	6	9	7
south purchase mln tonnes corn months close double total imports united total imports set dramatic jump agriculture department production trade report department total south korea corn imports season oct sept estimated mln tonnes mln tonnes united season imports totaled mln tonnes corn total mln tonnes appears shifting corn light competitive prices uncertain supplies china argentina south africa	1	south purchase mln tonnes corn months close double total imports united total imports set dramatic jump agriculture department production trade report department total south korea corn imports season oct sept estimated mln tonnes mln tonnes united season imports totaled mln tonnes corn total mln tonnes appears shifting corn light competitive prices uncertain supplies china argentina south africa	0	0	0	0	1	3	1	0	1	2	8	6	6	7	9	4	9	0	6
bangladesh keeping options seek penalty continental grain united alleged breach wheat shipment contract company shipment cargo senior food ministry official official declined named company deal agreed ship tonnes wheat april tonnes april shipped tonnes altogether supplier pay penalty rate dlrs tonne delayed day document signed food ministry agent told reuters arrange quick shipment view official …	1	bangladesh keeping options seek penalty continental grain united alleged breach wheat shipment contract company shipment cargo senior food ministry official official declined named company deal agreed ship tonnes wheat april tonnes april shipped tonnes altogether supplier pay penalty rate dlrs tonne delayed day document signed food ministry agent told reuters arrange quick shipment view official …	0	0	0	0	1	3	1	0	1	2	8	6	6	7	9	4	9	0	12
ten grain ships loading waiting load orleans elevators trade sources elevator loading waiting continental grain mississippi river adm growmark grain elevator loading waiting st charles reserve elevator corp peavey st cargill grain cargill grain port allen	1	ten grain ships loading waiting load orleans elevators trade sources elevator loading waiting continental grain mississippi river adm growmark grain elevator loading waiting st charles reserve elevator corp peavey st cargill grain cargill grain port allen	0	0	0	4	5	3	7	7	5	8	7	3	3	3	3	11	4	11	11
eligible producers crop corn sorghum receive estimated mln dlrs deficiency payments pct generic commodity certificates pct cash agriculture department corn producers receive mln dlrs sorghum producers mln dlrs cash portion payments subject pct reduction compliance gramm rudman budget deficit control corn sorghum producers requested advance deficiency payments received billion dlrs mln dlrs usda d…	1	eligible producers crop corn sorghum receive estimated mln dlrs deficiency payments pct generic commodity certificates pct cash agriculture department corn producers receive mln dlrs sorghum producers mln dlrs cash portion payments subject pct reduction compliance gramm rudman budget deficit control corn sorghum producers requested advance deficiency payments received billion dlrs mln dlrs usda d…	0	0	0	4	5	3	7	7	5	8	7	3	3	2	12	2	17	15	3
trade representative clayton yeutter suggested file formal complaint agreement tariffs trade gatt challenging decision impose duties corn imports canadian government decision apply duty cents bushel corn shipments yeutter file formal complaint gatt dispute settlement procedures subsidies code options appeal decision canadian courts retaliate canadian lower level trade official retaliation step in…	1	trade representative clayton yeutter suggested file formal complaint agreement tariffs trade gatt challenging decision impose duties corn imports canadian government decision apply duty cents bushel corn shipments yeutter file formal complaint gatt dispute settlement procedures subsidies code options appeal decision canadian courts retaliate canadian lower level trade official retaliation step in…	1	1	3	1	2	4	3	1	0	1	2	11	10	8	2	1	16	1	16
argentine grain growers reduced estimates maize soybean production current harvest week yesterday trade sources soybean production estimated reach mln tonnes versus mln tonnes estimated week ago mln tonnes estimated mid february lowest estimates pct total mln tonnes official figures record total planted soybeans harvest record mln hectares increased pct compared mln hectares planted change yield …	1	argentine grain growers reduced estimates maize soybean production current harvest week yesterday trade sources soybean production estimated reach mln tonnes versus mln tonnes estimated week ago mln tonnes estimated mid february lowest estimates pct total mln tonnes official figures record total planted soybeans harvest record mln hectares increased pct compared mln hectares planted change yield …	0	0	0	0	1	0	5	6	2	7	0	8	9	11	11	0	0	9	7
commodity credit corporation ccc authorized mln dlrs credit guarantees north yemen cover purchases wheat intermediate export credit guarantee program gsm agriculture department program credit terms extended excess sales registered exports completed september department	1	commodity credit corporation ccc authorized mln dlrs credit guarantees north yemen cover purchases wheat intermediate export credit guarantee program gsm agriculture department program credit terms extended excess sales registered exports completed september department	0	0	0	4	5	3	7	7	9	10	4	2	2	6	5	12	12	14	15
explosion fire damaged grain elevator bancroft iowa destroying thousands bushels grain authorities pre explosion elevator fire continued burning late morning contained police department injuries reported rock facility elevator filled corn nearby drying building holding soybeans fire explosion days iowa destruction archer daniels midland elevator burlington friday	1	explosion fire damaged grain elevator bancroft iowa destroying thousands bushels grain authorities pre explosion elevator fire continued burning late morning contained police department injuries reported rock facility elevator filled corn nearby drying building holding soybeans fire explosion days iowa destruction archer daniels midland elevator burlington friday	0	0	0	4	5	3	7	7	5	8	7	3	3	2	12	2	17	15	3
key house agriculture committee agreed scale provision pending disaster aid bill cover crop wheat broader proposal congressional sources sources key lawmakers including glenn english okla dan glickman kan agreed support amendment offered week rep charles tex limit producers crop winter spring wheat scale provision original proposal english allowing pilot program wheat provision subcommittee crop …	1	key house agriculture committee agreed scale provision pending disaster aid bill cover crop wheat broader proposal congressional sources sources key lawmakers including glenn english okla dan glickman kan agreed support amendment offered week rep charles tex limit producers crop winter spring wheat scale provision original proposal english allowing pilot program wheat provision subcommittee crop …	1	0	0	4	5	3	7	7	5	8	7	3	3	3	3	2	2	2	13
evidence winterkill winter wheat field travel running northwest belgrade agriculture counselor belgrade field report report dated february evidence delayed late fall dry conditions warm temperatures weeks promoted growth crop late yugoslav agriculture officials concerned situation warm temperatures brought grain dormancy snow protection report cold temperatures month damage conditions report whea…	1	evidence winterkill winter wheat field travel running northwest belgrade agriculture counselor belgrade field report report dated february evidence delayed late fall dry conditions warm temperatures weeks promoted growth crop late yugoslav agriculture officials concerned situation warm temperatures brought grain dormancy snow protection report cold temperatures month damage conditions report whea…	0	0	0	4	5	3	7	7	5	8	7	3	3	3	3	11	4	11	11
earlier optimistic indications south african corn crop critical stage development reports heat stress reduce production exportable supplies agriculture department report export markets grains department south corn exports oct sept season estimated mln tonnes pct previous emergence south africa competitor period severe required south africa import mln corn imports facing increased competition sout…	1	earlier optimistic indications south african corn crop critical stage development reports heat stress reduce production exportable supplies agriculture department report export markets grains department south corn exports oct sept season estimated mln tonnes pct previous emergence south africa competitor period severe required south africa import mln corn imports facing increased competition sout…	0	0	0	0	1	3	1	0	5	2	7	3	3	2	12	2	17	15	3
billion dlrs generic certificates market harvest agriculture department official commodity credit corp depend heavily certificates relieve storage ralph klopfenstein deputy administrator commodity operations usda told participants national grain feed annual convention klopfenstein ccc relocate grain amount fall certificates programs relieve storage tightness klopfenstein certificates meet goal al…	1	billion dlrs generic certificates market harvest agriculture department official commodity credit corp depend heavily certificates relieve storage ralph klopfenstein deputy administrator commodity operations usda told participants national grain feed annual convention klopfenstein ccc relocate grain amount fall certificates programs relieve storage tightness klopfenstein certificates meet goal al…	0	0	0	4	5	3	7	7	5	8	7	3	3	6	5	2	12	14	15
agriculture department increased estimate soviet grain imports mln tonnes projection mln tonnes monthly ussr grain situation outlook usda increase reflected return soviet union corn market continued purchases wheat coarse grain major suppliers ussr wheat imports projected mln tonnes mln estimate tonnes preliminary figure soviet grain feed estimated record mln tonnes record record livestock invent…	1	agriculture department increased estimate soviet grain imports mln tonnes projection mln tonnes monthly ussr grain situation outlook usda increase reflected return soviet union corn market continued purchases wheat coarse grain major suppliers ussr wheat imports projected mln tonnes mln estimate tonnes preliminary figure soviet grain feed estimated record mln tonnes record record livestock invent…	0	0	0	0	1	3	1	0	1	2	8	6	6	7	9	4	9	0	6
graan elevator mij balance port grains oilseeds derivatives rose tonnes march week earlier arrivals tonnes tonnes week balance comprised tonnes grains oilseeds tonnes derivatives estimated arrivals total tonnes grains oilseeds derivatives figures cover pct rotterdam traffic products concerned	1	graan elevator mij balance port grains oilseeds derivatives rose tonnes march week earlier arrivals tonnes tonnes week balance comprised tonnes grains oilseeds tonnes derivatives estimated arrivals total tonnes grains oilseeds derivatives figures cover pct rotterdam traffic products concerned	0	0	0	0	1	3	1	0	1	2	8	6	6	7	9	4	9	0	6
soviet communist party criticised grain products ministry failing ensure proper grain storage poor quality bread unsatisfactory book keeping pravda party daily losses industry waste theft amounted mln roubles half situation bad central asian republic severely criticised leader december leader times grain growing republic performed badly obliged seek grain supplies national reserves tass news agen…	1	soviet communist party criticised grain products ministry failing ensure proper grain storage poor quality bread unsatisfactory book keeping pravda party daily losses industry waste theft amounted mln roubles half situation bad central asian republic severely criticised leader december leader times grain growing republic performed badly obliged seek grain supplies national reserves tass news agen…	0	0	0	4	5	3	7	7	5	8	7	3	3	3	3	11	4	11	11
gradual continued regions western soviet union week april joint agricultural weather facility agriculture commerce departments international weather crop summary agency precipitation fell rain southern snow cover continued slowly retreat moderate deep snow cover northern half northern north lower month usual agency average weekly temperatures normal southeast normal southwest northeast normal nor…	1	gradual continued regions western soviet union week april joint agricultural weather facility agriculture commerce departments international weather crop summary agency precipitation fell rain southern snow cover continued slowly retreat moderate deep snow cover northern half northern north lower month usual agency average weekly temperatures normal southeast normal southwest northeast normal nor…	0	0	0	4	5	3	7	7	5	8	7	3	3	3	11	11	4	11	11
agriculture department detailed supply demand data major importers exporters coarse grains country mln tonnes ussr coarse grain start stcks production imports domes exports nil nil nil nil stocks ec coarse grain mln tonnes start stcks production imports exports stocks eastern europe coarse grain mln tonnes start stcks production imports exports stocks japan coarse grain mln tonnes start stcks pro…	1	agriculture department detailed supply demand data major importers exporters coarse grains country mln tonnes ussr coarse grain start stcks production imports domes exports nil nil nil nil stocks ec coarse grain mln tonnes start stcks production imports exports stocks eastern europe coarse grain mln tonnes start stcks production imports exports stocks japan coarse grain mln tonnes start stcks pro…	0	0	0	0	1	3	1	0	1	2	8	6	6	7	9	4	9	0	6
senate agriculture committee approved measure exempt farmers planted federal conservation requirement sen edward bill restore equity federal rules deny farm program benefits farmers planted plantings row crop official leading conservation identified move action lead exemption millions acres regulations established farm bill	1	senate agriculture committee approved measure exempt farmers planted federal conservation requirement sen edward bill restore equity federal rules deny farm program benefits farmers planted plantings row crop official leading conservation identified move action lead exemption millions acres regulations established farm bill	1	1	3	4	5	4	7	7	5	8	7	3	3	2	12	2	2	2	13
agriculture secretary richard lyng reagan administration decided offering soviet union subsidized wheat offer ruled interview reuters lyng knowledge upcoming discussion matter cabinet administration ruled offering subsidize wheat exports soviet union export enhancement program lyng decision talked looked reports moscow buy wheat competitively priced lyng responded soviets offer buy wheat accept d…	1	agriculture secretary richard lyng reagan administration decided offering soviet union subsidized wheat offer ruled interview reuters lyng knowledge upcoming discussion matter cabinet administration ruled offering subsidize wheat exports soviet union export enhancement program lyng decision talked looked reports moscow buy wheat competitively priced lyng responded soviets offer buy wheat accept d…	0	0	0	4	5	3	7	7	5	8	7	3	3	3	3	2	4	10	2
national association wheat growers nawg urged reagan administration offer soviet union wheat export enhancement program eep letter agriculture secretary richard lyng nawg stated strong support eep offer moscow solid continues exist soviet eep eligibility announced reported soviet purchases corn soviet willingness purchase grain competitively priced nawg renew eep offer ensure mutual adherence ter…	1	national association wheat growers nawg urged reagan administration offer soviet union wheat export enhancement program eep letter agriculture secretary richard lyng nawg stated strong support eep offer moscow solid continues exist soviet eep eligibility announced reported soviet purchases corn soviet willingness purchase grain competitively priced nawg renew eep offer ensure mutual adherence ter…	0	0	0	4	5	3	7	7	5	8	7	3	3	3	3	2	4	10	2
japan plans liberalise farm markets narrow gap price farm products overseas agriculture minister mutsuki kato told reporters move aimed criticism japanese protectionism agricultural kato plans start bilateral trade talks united rice staple food washington called rice policy extreme protectionism demanded access growers japanese market closed imports emergency kato japanese farmers blood relieve d…	1	japan plans liberalise farm markets narrow gap price farm products overseas agriculture minister mutsuki kato told reporters move aimed criticism japanese protectionism agricultural kato plans start bilateral trade talks united rice staple food washington called rice policy extreme protectionism demanded access growers japanese market closed imports emergency kato japanese farmers blood relieve d…	1	1	3	1	2	4	3	1	0	1	10	10	8	13	13	5	8	17	4
sri food department officials department agriculture rejected offer dlrs tonne supply tonnes soft wheat colombo pacific northwest sri food department subsequently counter offer firms buy wheat dlrs april delivery company usda approval proposed price inform department gmt	1	sri food department officials department agriculture rejected offer dlrs tonne supply tonnes soft wheat colombo pacific northwest sri food department subsequently counter offer firms buy wheat dlrs april delivery company usda approval proposed price inform department gmt	0	0	0	4	5	3	7	7	9	10	4	2	2	6	5	12	4	14	15
taiwan overnight bought tonnes corn pct moisture gulf west coast shipment cargoes october private export sources gulf shipment ranged prices dlrs tonne trimmed fob west coast shipments ranged dlrs tonne trimmed fob equivalent	1	taiwan overnight bought tonnes corn pct moisture gulf west coast shipment cargoes october private export sources gulf shipment ranged prices dlrs tonne trimmed fob west coast shipments ranged dlrs tonne trimmed fob equivalent	0	0	0	0	1	3	1	0	9	2	4	2	2	7	9	4	9	0	12
shr cts cts shr diluted cts cts net revs mln mln mths shr cts cts shr diluted cts cts net revs mln mln note includes change accounting investment tax credit cts share mths prior qtr includes recurring charge abandoning plan convert limited partnership	1	shr cts cts shr diluted cts cts net revs mln mln mths shr cts cts shr diluted cts cts net revs mln mln note includes change accounting investment tax credit cts share mths prior qtr includes recurring charge abandoning plan convert limited partnership	0	2	2	3	3	1	0	4	4	5	1	4	5	5	4	13	5	8	5
upcoming month deficiency payments corn sorghum farmers half cash half generic commodity certificates senior agriculture department official told reuters mln dlrs certificates certs mailed farmers march tom von assistant deputy administrator county operations decision payments cash certs ratio monday payments producers delayed mid month computer program von cts bushel payment cts certs cts cash c…	1	upcoming month deficiency payments corn sorghum farmers half cash half generic commodity certificates senior agriculture department official told reuters mln dlrs certificates certs mailed farmers march tom von assistant deputy administrator county operations decision payments cash certs ratio monday payments producers delayed mid month computer program von cts bushel payment cts certs cts cash c…	0	0	0	4	5	1	7	7	5	8	7	3	3	2	12	2	17	15	13
wheat imports expected fall mln tonnes calendar mln annual agriculture report drop expected drawdown stocks built wheat stocks tonnes forecast stocks tonnes main suppliers australia pct pct canada pct argentina pct saudi arabia pct	1	wheat imports expected fall mln tonnes calendar mln annual agriculture report drop expected drawdown stocks built wheat stocks tonnes forecast stocks tonnes main suppliers australia pct pct canada pct argentina pct saudi arabia pct	0	0	0	0	1	3	1	0	1	2	8	8	9	11	11	6	13	13	8
grain planting intentions stocks reports bear optimistic news agriculture grain analyst chicago board trade panel decline intended soybean acreage lower stocks report time optimism john grain analyst executive vice president department agriculture farmers intend plant mln acres corn mln planted mln acres soybeans mln report march stocks billion bushels soybeans billion bushels corn billion bushel…	1	grain planting intentions stocks reports bear optimistic news agriculture grain analyst chicago board trade panel decline intended soybean acreage lower stocks report time optimism john grain analyst executive vice president department agriculture farmers intend plant mln acres corn mln planted mln acres soybeans mln report march stocks billion bushels soybeans billion bushels corn billion bushel…	0	0	0	4	5	0	7	7	5	8	7	3	3	2	12	2	17	15	3
indonesia agriculture sector grow pct calendar estimated pct production commodities declines embassy report production indonesia staple food rice forecast fall mln tonnes embassy estimate mln tonnes annual report indonesia agricultural performance government officially estimates rice production mln tonnes forecast mln tonnes output report wheat imports fall mln tonnes calendar mln tonnes drawdown…	1	indonesia agriculture sector grow pct calendar estimated pct production commodities declines embassy report production indonesia staple food rice forecast fall mln tonnes embassy estimate mln tonnes annual report indonesia agricultural performance government officially estimates rice production mln tonnes forecast mln tonnes output report wheat imports fall mln tonnes calendar mln tonnes drawdown…	0	0	0	0	1	3	1	0	1	2	8	6	6	7	9	4	9	0	6
japan increase foreign access farm products market encouraging development domestic agriculture government report white paper agriculture march active participation writing farm trade rules round agreement tariffs trade gatt talks prepare japan improve access agriculture ministry sources paper marked easing tough position agricultural imports stressed strict controls products maintain sufficiency…	1	japan increase foreign access farm products market encouraging development domestic agriculture government report white paper agriculture march active participation writing farm trade rules round agreement tariffs trade gatt talks prepare japan improve access agriculture ministry sources paper marked easing tough position agricultural imports stressed strict controls products maintain sufficiency…	1	1	3	1	2	4	3	1	0	1	10	10	8	13	13	5	8	17	4
agriculture department accepted bid export bonus cover sale durum wheat algeria usda sales manager sims commodity credit corp accepted bid usa sale tonnes durum wheat sims bonus dlrs tonne shipment scheduled june additional tonnes durum wheat algeria export enhancement program	1	agriculture department accepted bid export bonus cover sale durum wheat algeria usda sales manager sims commodity credit corp accepted bid usa sale tonnes durum wheat sims bonus dlrs tonne shipment scheduled june additional tonnes durum wheat algeria export enhancement program	0	0	0	4	5	3	7	7	9	10	4	2	2	6	5	12	12	14	15
intergrated generics biopharmaceutics subsidiary negotiations manufacturer distributor generic equivalents brand prescription drugs company successful agreement distribute anti anxiety drug market potential mln dlrs integrated anonymity time finalization agreement expected weeks company	1	intergrated generics biopharmaceutics subsidiary negotiations manufacturer distributor generic equivalents brand prescription drugs company successful agreement distribute anti anxiety drug market potential mln dlrs integrated anonymity time finalization agreement expected weeks company	0	2	2	3	3	0	5	6	2	7	0	0	0	0	0	0	6	12	7
argentine grain board issued figures covering shipments major export grains week april tonnes comparisons previous week week bread wheat maize sorghum soybean nil nil nil sunflowerseed nil cumulative figures april calendar previous figures brackets thousands tonnes bread wheat maize sorghum soybean nil nil nil nil sunflowerseed nil nil	1	argentine grain board issued figures covering shipments major export grains week april tonnes comparisons previous week week bread wheat maize sorghum soybean nil nil nil sunflowerseed nil cumulative figures april calendar previous figures brackets thousands tonnes bread wheat maize sorghum soybean nil nil nil nil sunflowerseed nil nil	0	0	0	0	1	3	1	0	1	2	8	6	6	7	9	4	9	0	12
thailand exported tonnes rice week march tonnes previous week commerce ministry government private exporters shipped tonnes private exporters concluded advance weekly sales tonnes tonnes previous week thailand exported mln tonnes rice january march mln tonnes ago commitments export tonnes	1	thailand exported tonnes rice week march tonnes previous week commerce ministry government private exporters shipped tonnes private exporters concluded advance weekly sales tonnes tonnes previous week thailand exported mln tonnes rice january march mln tonnes ago commitments export tonnes	0	0	0	0	1	3	1	0	1	2	8	6	6	7	9	4	9	0	6
argentine grain market quiet week wednesday prices rising increased wheat wheat domestic consumption rose australs tonne export rose tonne bahia blanca increased unchanged rosario maize increased tonne buenos aires unchanged bahia blanca increased fell parana river ports sorghum bahia blanca increased australs tonne dropped rosario quoted san puerto oats unchanged tonne buenos aires buenos aires …	1	argentine grain market quiet week wednesday prices rising increased wheat wheat domestic consumption rose australs tonne export rose tonne bahia blanca increased unchanged rosario maize increased tonne buenos aires unchanged bahia blanca increased fell parana river ports sorghum bahia blanca increased australs tonne dropped rosario quoted san puerto oats unchanged tonne buenos aires buenos aires …	0	0	0	4	5	3	1	0	9	10	4	2	2	6	5	12	12	14	12
federal grain inspection service advisory committee meet monday april agriculture department items agenda meeting scheduled edt grain quality issues status proposed regulations financial matters safety matters department federal grain inspection service advisory committee composed representing grain industry provide advice administrator federal grain inspection service	1	federal grain inspection service advisory committee meet monday april agriculture department items agenda meeting scheduled edt grain quality issues status proposed regulations financial matters safety matters department federal grain inspection service advisory committee composed representing grain industry provide advice administrator federal grain inspection service	0	0	0	4	5	3	7	7	5	8	7	3	3	3	3	2	4	11	11
agriculture department forecast wheat crop mln tonnes mln tonnes month estimated output mln tonnes mln month australian wheat exports forecast mln tonnes mln tonnes month exports estimated mln tonnes mln month	1	agriculture department forecast wheat crop mln tonnes mln tonnes month estimated output mln tonnes mln month australian wheat exports forecast mln tonnes mln tonnes month exports estimated mln tonnes mln month	0	0	0	0	1	0	1	0	1	2	8	6	6	7	9	4	0	0	6
australian government reimburse australian wheat board awb mln dlrs pay wheat farmers crop agriculture department report export markets grains department sharp fall wheat prices reduced export sales revenue awb levels insufficient cover breakeven export price estimated dlrs tonne sales wheat china mln tonnes egypt mln tonnes breakeven export price australian wheat farmers receive advance payment …	1	australian government reimburse australian wheat board awb mln dlrs pay wheat farmers crop agriculture department report export markets grains department sharp fall wheat prices reduced export sales revenue awb levels insufficient cover breakeven export price estimated dlrs tonne sales wheat china mln tonnes egypt mln tonnes breakeven export price australian wheat farmers receive advance payment …	0	0	0	4	5	3	7	7	9	10	4	2	2	7	9	12	9	14	15
exported tonnes wheat tonnes barley february grown cereals authority based previous provisional figures issued february wheat exports increased tonnes barley tonnes figures bring cumulative wheat exports period july march mln tonnes barley mln compared mln tonnes season	1	exported tonnes wheat tonnes barley february grown cereals authority based previous provisional figures issued february wheat exports increased tonnes barley tonnes figures bring cumulative wheat exports period july march mln tonnes barley mln compared mln tonnes season	0	0	0	0	1	3	1	0	1	2	8	6	6	7	9	4	9	0	6
brazil suspended tonnes maize excellent domestic maize harvest expected agriculture minister agriculture ministry expects record maize crop mln tonnes pct increase crop mln tonnes total grain crop expected mln tonnes record history brazilian agriculture ministry spokesman announced suspension maize imports news conference brasilia yesterday ministry spokesman details maize transaction	1	brazil suspended tonnes maize excellent domestic maize harvest expected agriculture minister agriculture ministry expects record maize crop mln tonnes pct increase crop mln tonnes total grain crop expected mln tonnes record history brazilian agriculture ministry spokesman announced suspension maize imports news conference brasilia yesterday ministry spokesman details maize transaction	0	0	0	0	1	3	1	0	1	2	8	6	6	7	9	4	9	0	12
program impact acreage prompting farmers idle additional mln acres report agriculture department savings additional mln acres idled mln dlrs loan savings mln dlrs transportation storage savings mln dlrs deficiency payment savings report usda report impacts proposed acreage program wheat corn cotton sorghum barley mln acres crops harvested likelihood removed crop production report returns typical …	1	program impact acreage prompting farmers idle additional mln acres report agriculture department savings additional mln acres idled mln dlrs loan savings mln dlrs transportation storage savings mln dlrs deficiency payment savings report usda report impacts proposed acreage program wheat corn cotton sorghum barley mln acres crops harvested likelihood removed crop production report returns typical …	0	0	0	4	5	0	7	7	5	8	7	3	3	2	12	2	17	15	3
purchases corn soviet union domestic cash market increasing price difference premium price paid gulf export interior levels cash grain dealers dealers expect usda reduce cash price premium gulf versus interior dealer iowa roughly pct wider normal time cents bushel worthwhile farmers move grain lowering ascs county posted prices corn usda encourage farmers engage pik roll corn sales pik certificat…	1	purchases corn soviet union domestic cash market increasing price difference premium price paid gulf export interior levels cash grain dealers dealers expect usda reduce cash price premium gulf versus interior dealer iowa roughly pct wider normal time cents bushel worthwhile farmers move grain lowering ascs county posted prices corn usda encourage farmers engage pik roll corn sales pik certificat…	0	0	0	4	5	3	7	7	5	8	7	3	3	2	12	2	17	15	3
trade representative clayton yeutter finding announced corn imports canadian farmers totally corn exports canada canadian corn farmers reasonable measure yeutter statement countries follow lead result protectionist actions french corn growers challenge corn feed shipments europe yeutter examine canadian decision closely believes decision based carefully evaluate yeutter steps response	1	trade representative clayton yeutter finding announced corn imports canadian farmers totally corn exports canada canadian corn farmers reasonable measure yeutter statement countries follow lead result protectionist actions french corn growers challenge corn feed shipments europe yeutter examine canadian decision closely believes decision based carefully evaluate yeutter steps response	1	1	3	4	5	4	7	7	5	8	7	3	3	2	12	2	17	15	16
agricultural stabilization conservation service ascs seeking offers process rice owned commodity credit corporation ccc deliver mln pounds milled rice export shipment june ascs spokesman offers received cdt april successful notified april	1	agricultural stabilization conservation service ascs seeking offers process rice owned commodity credit corporation ccc deliver mln pounds milled rice export shipment june ascs spokesman offers received cdt april successful notified april	0	0	0	4	5	3	7	7	9	10	4	2	2	6	5	12	12	14	15
agriculture department accepted acres highly conservation reserve program usda announced signup farmers farms submitted bids total acres accepted bids annual rental payments ranged dlrs acre average dlrs acre land entered conservation reserve program farming ten planted permanent cover producers enrolled acres corn base acreage conservation program advantage corn bonus rental payment offered usda…	1	agriculture department accepted acres highly conservation reserve program usda announced signup farmers farms submitted bids total acres accepted bids annual rental payments ranged dlrs acre average dlrs acre land entered conservation reserve program farming ten planted permanent cover producers enrolled acres corn base acreage conservation program advantage corn bonus rental payment offered usda…	0	0	0	4	5	3	7	7	5	8	7	3	3	2	12	2	17	15	3
swiss lawyers headed attempt restrict banking secrecy curb powers clients revised code banking conduct agreed association week analysts drug insider dealing money controversy accounts ousted philippine haitian hurt standing swiss banks strained international relations united critics code fell short demands reform close key loophole requirement banks identity customers social democratic party ruli…	1	swiss lawyers headed attempt restrict banking secrecy curb powers clients revised code banking conduct agreed association week analysts drug insider dealing money controversy accounts ousted philippine haitian hurt standing swiss banks strained international relations united critics code fell short demands reform close key loophole requirement banks identity customers social democratic party ruli…	1	1	3	1	2	4	3	1	0	1	2	8	9	11	11	14	6	12	17
government daily considerable amount soviet winter crops grain harvest target mln tonnes easy fulfil figures newspaper considerable winter crops extra effort fields spring soviet union mln hectares winter grain winterkill department agriculture analyst washington figure mln hectares equal pct total winter crop winterkill planned task bringing mln tonnes grain simple sudden fall temperatures count…	1	government daily considerable amount soviet winter crops grain harvest target mln tonnes easy fulfil figures newspaper considerable winter crops extra effort fields spring soviet union mln hectares winter grain winterkill department agriculture analyst washington figure mln hectares equal pct total winter crop winterkill planned task bringing mln tonnes grain simple sudden fall temperatures count…	0	0	0	0	1	3	5	6	5	8	7	3	3	3	3	11	4	11	11
vital rice crop estimated tonnes paddy ministry agriculture trade ministry rice imports local currency months government established buffer stock staple food rice imports increased billion francs months billion period ministry disclosing tonnages involved	1	vital rice crop estimated tonnes paddy ministry agriculture trade ministry rice imports local currency months government established buffer stock staple food rice imports increased billion francs months billion period ministry disclosing tonnages involved	1	1	1	2	0	2	4	3	6	0	5	5	4	9	7	3	14	16	0
sen tom harkin iowa defended controversial mandatory supply control farm bill farmers allowed vote approve proposal harkin proposal set loan rates dlrs bushel wheat dlrs corn dlrs soybeans strict controls planted acreage reductions loan rates dlrs wheat corn effectively soybeans plan seek market sharing cartel european community exporting nations share export markets harkin senate agriculture sub…	1	sen tom harkin iowa defended controversial mandatory supply control farm bill farmers allowed vote approve proposal harkin proposal set loan rates dlrs bushel wheat dlrs corn dlrs soybeans strict controls planted acreage reductions loan rates dlrs wheat corn effectively soybeans plan seek market sharing cartel european community exporting nations share export markets harkin senate agriculture sub…	0	1	0	4	5	3	7	7	5	8	7	3	3	2	12	2	2	2	13
argentine grain board adjusted minimum export prices grain oilseed products dlrs tonne fob previous brackets sorghum sunflowerseed cake expellers pellets meal linseed oil groundnutseed oil soybean oil rapeseed oil sunflowerseed oil shipment june onwards board adjusted export prices export taxes levied dlrs tonne fob previous brackets wheat pellets	1	argentine grain board adjusted minimum export prices grain oilseed products dlrs tonne fob previous brackets sorghum sunflowerseed cake expellers pellets meal linseed oil groundnutseed oil soybean oil rapeseed oil sunflowerseed oil shipment june onwards board adjusted export prices export taxes levied dlrs tonne fob previous brackets wheat pellets	0	2	2	3	4	6	2	2	7	4	9	7	1	1	5	12	1	4	1
ec commission rejected bids free market bread feed wheat bids special west german tender weekly ec cereals tender trade sources granted export licences tonnes free market barley maximum rebate ecus tonne tonnes maize maximum rebate ecus licences tonnes barley awarded french trade houses	1	ec commission rejected bids free market bread feed wheat bids special west german tender weekly ec cereals tender trade sources granted export licences tonnes free market barley maximum rebate ecus tonne tonnes maize maximum rebate ecus licences tonnes barley awarded french trade houses	0	0	0	0	1	3	1	0	3	2	3	1	11	4	14	9	9	0	12
lend sudan mln dlrs buy tonnes wheat tonnes wheat flour agreement signed agreement sudan receive mln dlrs commodities rest sea transportation loan including grace period pct grace period pct repayment period	1	lend sudan mln dlrs buy tonnes wheat tonnes wheat flour agreement signed agreement sudan receive mln dlrs commodities rest sea transportation loan including grace period pct grace period pct repayment period	0	0	0	0	1	3	1	0	1	2	8	6	6	7	9	4	9	0	6
agriculture department private exporters reported sales tonnes wheat jordan tonnes soybean meal iraq tonnes corn algeria wheat jordan includes tonnes hard red winter tonnes soft red winter delivery marketing soybean meal sales iraq includes tonnes delivery season tonnes season department tonnes corn sales algeria delivery season marketing wheat june corn september soybean meal october	1	agriculture department private exporters reported sales tonnes wheat jordan tonnes soybean meal iraq tonnes corn algeria wheat jordan includes tonnes hard red winter tonnes soft red winter delivery marketing soybean meal sales iraq includes tonnes delivery season tonnes season department tonnes corn sales algeria delivery season marketing wheat june corn september soybean meal october	0	0	0	0	1	3	1	0	1	2	8	6	6	7	9	4	9	0	6
generic commodity certificates certs fiscal save government mln dlrs department agriculture undersecretary daniel amstutz speaking house agriculture subcommittee hearing certificates amstutz issuance billion dlrs certificates fiscal result government outlays mln dlrs certificates mln dlrs storage handling costs net savings government mln dlrs certificates amstutz entire crop loan commodity credit…	1	generic commodity certificates certs fiscal save government mln dlrs department agriculture undersecretary daniel amstutz speaking house agriculture subcommittee hearing certificates amstutz issuance billion dlrs certificates fiscal result government outlays mln dlrs certificates mln dlrs storage handling costs net savings government mln dlrs certificates amstutz entire crop loan commodity credit…	0	0	0	4	5	0	7	7	5	8	7	3	3	2	5	2	6	14	13
dutch animal feed formal legal proceedings month test ec grain responsibility levy applied spokesman dutch grain feed trade association het comite told reuters het comite national actions alleged distortions caused currency factors levy december individual business appeal court hague basic complaint levy account currency cross rates exchange countries strong currencies pay currency paid producers…	1	dutch animal feed formal legal proceedings month test ec grain responsibility levy applied spokesman dutch grain feed trade association het comite told reuters het comite national actions alleged distortions caused currency factors levy december individual business appeal court hague basic complaint levy account currency cross rates exchange countries strong currencies pay currency paid producers…	1	1	3	4	2	4	7	8	3	6	3	1	11	4	14	9	11	12	14
tonnes corn shipped soviet union week march agriculture export sales report wheat soybean shipments week ussr purchased mln tonnes corn march delivery fourth ussr grain agreement total shipments ussr grains agreement september amounted tonnes wheat tonnes corn tonnes soybeans	1	tonnes corn shipped soviet union week march agriculture export sales report wheat soybean shipments week ussr purchased mln tonnes corn march delivery fourth ussr grain agreement total shipments ussr grains agreement september amounted tonnes wheat tonnes corn tonnes soybeans	0	0	0	0	1	3	1	0	1	2	8	6	6	7	9	4	9	0	6
agriculture department supply demand projections seasons mln bushels comparisons corn stocks aug month stocks aug month exports projected month exports month domestic month usage season month wheat stocks projected month stocks month exports season month season month domestic month month cotton mln lb bales stocks july month stocks july month exports season month exports month soybeans mln bushel…	1	agriculture department supply demand projections seasons mln bushels comparisons corn stocks aug month stocks aug month exports projected month exports month domestic month usage season month wheat stocks projected month stocks month exports season month season month domestic month month cotton mln lb bales stocks july month stocks july month exports season month exports month soybeans mln bushel…	0	0	0	0	1	0	5	6	2	7	0	0	0	0	0	0	0	9	7
prospects renewal ussr grains agreement uncertain soviet trade official told reuters current trade imbalance united soviet union commodity prices increased grain production renewal supply agreement albert melnikov deputy trade representative soviet union interview current agreement expires sept melnikov grain markets agreement signed statements soviet officials term grains agreement attractive ag…	1	prospects renewal ussr grains agreement uncertain soviet trade official told reuters current trade imbalance united soviet union commodity prices increased grain production renewal supply agreement albert melnikov deputy trade representative soviet union interview current agreement expires sept melnikov grain markets agreement signed statements soviet officials term grains agreement attractive ag…	1	1	3	4	5	4	7	7	5	8	7	3	3	3	3	2	4	10	2
producers acreage reduction program eligible deficiency payments pct enrolled acreage planted wheat program crops agriculture department department provision farm disaster assistance eligible winter wheat producers producers types wheat prevented planting wheat crop natural disaster producers operate farms program crop acreage bases subject flooding pct permitted acreage producer acreage reductio…	1	producers acreage reduction program eligible deficiency payments pct enrolled acreage planted wheat program crops agriculture department department provision farm disaster assistance eligible winter wheat producers producers types wheat prevented planting wheat crop natural disaster producers operate farms program crop acreage bases subject flooding pct permitted acreage producer acreage reductio…	0	0	0	4	5	3	7	7	5	8	7	3	3	2	12	2	2	2	13
issuing centre swiss regional banks launching bond issues mln mln swiss francs mln franc issue coupon pct issue price pct mln franc issue coupon pct issue price pct subscriptions close march funds partly repay mln franc bond maturing april	1	issuing centre swiss regional banks launching bond issues mln mln swiss francs mln franc issue coupon pct issue price pct mln franc issue coupon pct issue price pct subscriptions close march funds partly repay mln franc bond maturing april	0	2	1	2	0	0	5	6	2	7	0	8	9	11	11	6	13	13	8
international wheat council iwc lifted estimate wheat coarse grain production mln tonnes record mln compared mln tonnes previous season monthly market report iwc leaving unchanged forecast wheat production coming season mln tonnes record mln mln tonne upward revision wheat production reflects minor adjustments iwc raised coarse grain trade figure mln mln tonnes left wheat trade unchanged mln iwc …	1	international wheat council iwc lifted estimate wheat coarse grain production mln tonnes record mln compared mln tonnes previous season monthly market report iwc leaving unchanged forecast wheat production coming season mln tonnes record mln mln tonne upward revision wheat production reflects minor adjustments iwc raised coarse grain trade figure mln mln tonnes left wheat trade unchanged mln iwc …	0	0	0	0	1	3	5	6	1	2	8	6	6	0	0	0	0	9	7
private exporters china bought total tonnes wheat export enhancement program final confirmation department agriculture subsidies awaited purchase consisted total tonnes hard red winter wheat aug shipments tonnes soft red winter aug sept exporters	1	private exporters china bought total tonnes wheat export enhancement program final confirmation department agriculture subsidies awaited purchase consisted total tonnes hard red winter wheat aug shipments tonnes soft red winter aug sept exporters	0	0	0	0	1	3	1	0	1	2	8	6	6	7	9	4	9	0	6
agriculture department forecast south corn crop mln tonnes mln tonnes month estimated crop mln mln month usda forecast south african corn exports mln tonnes mln tonnes month exports mln tonnes mln tonnes month	1	agriculture department forecast south corn crop mln tonnes mln tonnes month estimated crop mln mln month usda forecast south african corn exports mln tonnes mln tonnes month exports mln tonnes mln tonnes month	0	0	0	0	1	0	1	0	1	2	8	6	6	7	9	4	0	0	6
purchase mln dlrs worth wheat wheat flour public law issued sudan agriculture department authorization mln dlrs tonnes worth wheat grade durum mln dlrs tonnes worth wheat flour contracting period commodities march august delivery period wheat march september wheat flour april september usda	1	purchase mln dlrs worth wheat wheat flour public law issued sudan agriculture department authorization mln dlrs tonnes worth wheat grade durum mln dlrs tonnes worth wheat flour contracting period commodities march august delivery period wheat march september wheat flour april september usda	0	0	0	0	1	3	1	0	9	10	4	2	2	6	5	12	9	14	15
exports french soft wheat period july march fell pct mln tonnes mln tonnes period national cereals office onic quoting customs figures total exports ec countries totalled mln tonnes pct mln exports ec nations mln tonnes pct previous mln main ec destinations italy mln tonnes versus mln belgium tonnes mln netherlands west germany spain britain greece ireland flour exports totalled tonnes pct previo…	1	exports french soft wheat period july march fell pct mln tonnes mln tonnes period national cereals office onic quoting customs figures total exports ec countries totalled mln tonnes pct mln exports ec nations mln tonnes pct previous mln main ec destinations italy mln tonnes versus mln belgium tonnes mln netherlands west germany spain britain greece ireland flour exports totalled tonnes pct previo…	0	0	0	0	1	0	1	0	1	2	8	6	6	7	9	4	9	0	6
indications usda accepted bid tonnes hard red winter wheat rejected bids remaining tonnes export bonus tender exporters usda accepted bid dlrs tonne tonnes nov shipment nov dec sources rejected bids wheat shipment dates	1	indications usda accepted bid tonnes hard red winter wheat rejected bids remaining tonnes export bonus tender exporters usda accepted bid dlrs tonne tonnes nov shipment nov dec sources rejected bids wheat shipment dates	0	0	0	0	1	3	1	0	9	10	4	2	2	6	5	12	12	14	15
soviets urgent wheat subsidy offer offer soviet summit expected held month agriculture secretary richard lyng told reuters exclusive interview reuters lyng united offer moscow wheat subsidy offer offer offered pressing sort deal wheat subsidy subsidy offered soviet summit lyng agriculture secretary wheat subsidy deal moscow topic discussion summit issue president chairman specific negotiations di…	1	soviets urgent wheat subsidy offer offer soviet summit expected held month agriculture secretary richard lyng told reuters exclusive interview reuters lyng united offer moscow wheat subsidy offer offer offered pressing sort deal wheat subsidy subsidy offered soviet summit lyng agriculture secretary wheat subsidy deal moscow topic discussion summit issue president chairman specific negotiations di…	0	0	0	4	5	3	7	7	5	8	7	3	3	3	3	2	4	10	2
policy offering subsidized wheat moscow secretary george shultz told farm leaders products competitive market sell products wheat meet market shultz told board directors national association wheat growers competitive ridiculous buy product lower price approach negotiations soviets approach american farm program figure shultz told wheat growers schultz favor situation soviet buy food cheaper ameri…	1	policy offering subsidized wheat moscow secretary george shultz told farm leaders products competitive market sell products wheat meet market shultz told board directors national association wheat growers competitive ridiculous buy product lower price approach negotiations soviets approach american farm program figure shultz told wheat growers schultz favor situation soviet buy food cheaper ameri…	0	0	0	4	5	3	7	7	5	8	7	3	3	3	3	2	4	10	2
package proposed farm policy reagan administration congress includes provision eliminate minimum price support levels upland cotton rice soybeans package reuters includes provision outlined advance usda officials increase annual cut basic price support levels major crops pct pct current law basic support prices upland cotton rice soybeans cut cents lb dlrs dlrs bushel intention propose price cott…	1	package proposed farm policy reagan administration congress includes provision eliminate minimum price support levels upland cotton rice soybeans package reuters includes provision outlined advance usda officials increase annual cut basic price support levels major crops pct pct current law basic support prices upland cotton rice soybeans cut cents lb dlrs dlrs bushel intention propose price cott…	0	2	2	4	5	4	7	7	5	8	7	3	3	2	11	2	2	2	13
intergrated generics biopharmaceutics subsidiary negotiations manufacturer distributor generic equivalents brand prescription drugs company successful agreement distribute anti anxiety drug market potential mln dlrs integrated anonymity time finalization agreement expected weeks company	1	intergrated generics biopharmaceutics subsidiary negotiations manufacturer distributor generic equivalents brand prescription drugs company successful agreement distribute anti anxiety drug market potential mln dlrs integrated anonymity time finalization agreement expected weeks company	0	2	2	3	3	0	5	6	2	7	0	0	0	0	0	0	6	12	7
april december commodity credit corporation ccc issued billion dlrs worth generic certificates billion exchanged january agriculture department department additional billion dlrs certificates authorized issuance january august certificates provide ample free supplies corn wheat remainder crop department summary agricultural outlook report stocks certificates grain competitive markets department s…	1	april december commodity credit corporation ccc issued billion dlrs worth generic certificates billion exchanged january agriculture department department additional billion dlrs certificates authorized issuance january august certificates provide ample free supplies corn wheat remainder crop department summary agricultural outlook report stocks certificates grain competitive markets department s…	0	0	1	4	5	2	7	7	6	0	5	5	4	9	7	3	14	16	0
ban portuguese court buying agency epac cereals import tenders private traders remain reversed portugal challenged european court justice european commission sources denied statement yesterday portuguese agriculture minister commission accepted epac eligible view matter terms accession european community grain import monopoly held epac reduced pct annually imports liberalised civil court decided …	1	ban portuguese court buying agency epac cereals import tenders private traders remain reversed portugal challenged european court justice european commission sources denied statement yesterday portuguese agriculture minister commission accepted epac eligible view matter terms accession european community grain import monopoly held epac reduced pct annually imports liberalised civil court decided …	0	0	0	1	2	3	3	8	3	6	3	1	11	4	14	9	11	6	14
announcements moscow grain production targets soviets estimating grain crop mln tonnes agriculture department analysts usda soviet crop mln tonnes earlier estimates soviet officials grain crop match record mln tonnes moscow outlined economic targets monday putting grain harvest goal mln tonnes analyst soviet agriculture usda article soviet grain production planned mln tonnes expected estimate mln…	1	announcements moscow grain production targets soviets estimating grain crop mln tonnes agriculture department analysts usda soviet crop mln tonnes earlier estimates soviet officials grain crop match record mln tonnes moscow outlined economic targets monday putting grain harvest goal mln tonnes analyst soviet agriculture usda article soviet grain production planned mln tonnes expected estimate mln…	0	0	0	0	1	3	1	0	1	2	8	6	6	7	9	4	0	9	6
agriculture secretary richard lyng decisions white house economic policy council meeting speaking reporters return meeting lyng minutes session dealt agriculture issues decision meeting lyng aides lyng earlier agriculture legislative proposals farm topic agenda lyng comment farm issues discussed respond farm congressmen urging offer wheat bonus soviet union lyng	1	agriculture secretary richard lyng decisions white house economic policy council meeting speaking reporters return meeting lyng minutes session dealt agriculture issues decision meeting lyng aides lyng earlier agriculture legislative proposals farm topic agenda lyng comment farm issues discussed respond farm congressmen urging offer wheat bonus soviet union lyng	1	1	3	4	5	4	7	7	5	8	7	3	3	3	3	2	4	10	2
commodity credit corporation ccc accepted bid export bonus cover sale tonnes wheat flour iraq agriculture department department bonus awarded dlrs tonne wheat flour shipment july bonus awarded pillsbury company paid form commodities ccc stocks additional tonnes wheat flour iraq export enhancement program initiative announced january department	1	commodity credit corporation ccc accepted bid export bonus cover sale tonnes wheat flour iraq agriculture department department bonus awarded dlrs tonne wheat flour shipment july bonus awarded pillsbury company paid form commodities ccc stocks additional tonnes wheat flour iraq export enhancement program initiative announced january department	0	0	0	4	5	3	7	7	9	10	4	2	2	6	5	12	12	14	15
sharp cuts planted acreage grain stockpile grain surpluses increasing agriculture department industry commodity analysts scenario stocks supply demand picture finally balance usda analyst usda prospective plantings report week farmers idle mln acres annual acreage reduction programs additional mln acres enrolled conservation reserve program bringing total idled acreage mln acres total mln acre cr…	1	sharp cuts planted acreage grain stockpile grain surpluses increasing agriculture department industry commodity analysts scenario stocks supply demand picture finally balance usda analyst usda prospective plantings report week farmers idle mln acres annual acreage reduction programs additional mln acres enrolled conservation reserve program bringing total idled acreage mln acres total mln acre cr…	0	0	0	4	5	0	7	7	5	8	7	3	3	2	12	2	17	15	3
china switched purchases wheat totaling tonnes season june season delivery agriculture department department outstanding wheat sales china current season amount tonnes sales delivery season amount tonnes total corn commitments season total tonnes department	1	china switched purchases wheat totaling tonnes season june season delivery agriculture department department outstanding wheat sales china current season amount tonnes sales delivery season amount tonnes total corn commitments season total tonnes department	0	0	0	0	1	3	1	0	1	2	8	6	6	7	9	4	9	0	6
grain output major chinese grain producing province increasing farmers lack incentives production costs rising storage facilities poor investment grain vice governor china daily quoted vice governor anhui farmers earn growing cotton growing grain times growing cash crops production costs risen pct earnings pct lower investment caused land fall investment agriculture fell pct total investment pct …	1	grain output major chinese grain producing province increasing farmers lack incentives production costs rising storage facilities poor investment grain vice governor china daily quoted vice governor anhui farmers earn growing cotton growing grain times growing cash crops production costs risen pct earnings pct lower investment caused land fall investment agriculture fell pct total investment pct …	0	0	0	4	5	3	7	7	5	8	7	8	3	11	11	11	13	11	11
australian wheat awb export program advanced mln tonnes sold awb manager reach mln tonne export target statement detail commitments awb spokesman sales egypt china iran soviet union iraq wheat september awb exported record mln tonnes australian wheat harvest cool summer mln tonnes delivered awb season produced crop pct downgraded feed quality weather damaged grain held farms milling feed wheat de…	1	australian wheat awb export program advanced mln tonnes sold awb manager reach mln tonne export target statement detail commitments awb spokesman sales egypt china iran soviet union iraq wheat september awb exported record mln tonnes australian wheat harvest cool summer mln tonnes delivered awb season produced crop pct downgraded feed quality weather damaged grain held farms milling feed wheat de…	0	0	0	0	1	3	1	0	1	2	8	6	6	7	9	4	9	0	6
exported tonnes wheat tonnes barley january grown cereals authority quoting adjusted customs excise figures based previous january figures issued february wheat exports increased tonnes barley tonnes figures bring cumulative wheat exports period july february mln tonnes barley mln compared mln tonnes ago january wheat exports comprised tonnes european community destinations tonnes countries sovie…	1	exported tonnes wheat tonnes barley january grown cereals authority quoting adjusted customs excise figures based previous january figures issued february wheat exports increased tonnes barley tonnes figures bring cumulative wheat exports period july february mln tonnes barley mln compared mln tonnes ago january wheat exports comprised tonnes european community destinations tonnes countries sovie…	0	0	0	0	1	3	1	0	1	2	8	6	6	7	9	4	9	0	6
rains grain producing virtually coarse grain harvesting week yesterday trade sources sunflower maize sorghum harvests rains proved aid soybean crops harvesting april rains damage maize sunflower sorghum crops fresh rains volume reduce yields cut total volume harvest rainfall measured mm buenos aires heaviest rains western sectors mm cordoba mm la pampa mm santa fe mm mm mm san luis rain recorded …	1	rains grain producing virtually coarse grain harvesting week yesterday trade sources sunflower maize sorghum harvests rains proved aid soybean crops harvesting april rains damage maize sunflower sorghum crops fresh rains volume reduce yields cut total volume harvest rainfall measured mm buenos aires heaviest rains western sectors mm cordoba mm la pampa mm santa fe mm mm mm san luis rain recorded …	0	0	0	0	1	0	5	6	2	7	0	8	9	11	11	0	0	9	7
purchase mln tonnes corn japan tonnes south korea suggests demand reliable supplies corn increasing agriculture department production trade report department view expectation decline exportable supplies argentine corn uncertainty availability south african chinese corn corn purchases japan committed buying mln tonnes corn sept aug tonnes ago figures south cumulative commitments amount mln tonnes …	1	purchase mln tonnes corn japan tonnes south korea suggests demand reliable supplies corn increasing agriculture department production trade report department view expectation decline exportable supplies argentine corn uncertainty availability south african chinese corn corn purchases japan committed buying mln tonnes corn sept aug tonnes ago figures south cumulative commitments amount mln tonnes …	0	0	0	0	1	3	1	0	1	2	8	6	6	7	9	4	17	15	6
february volume chicago board trade cbt declined pct ago month contracts exchange steady rate climate reduced volume active contract treasury bond futures pct ago contracts trading agricultural futures contracts increased month led oats corn futures oats volume contracts corn volume increased pct contracts wheat soybean oil futures activity rose ago soybean soybean oil volume slipped exchange maj…	1	february volume chicago board trade cbt declined pct ago month contracts exchange steady rate climate reduced volume active contract treasury bond futures pct ago contracts trading agricultural futures contracts increased month led oats corn futures oats volume contracts corn volume increased pct contracts wheat soybean oil futures activity rose ago soybean soybean oil volume slipped exchange maj…	0	2	2	4	5	6	7	7	5	8	7	8	9	11	11	6	13	13	8
ship tonnes feed wheat china month food aid cost british aid program mln stg overseas development administration wheat supplied grain exporter uk european obligation food aid convention pledged supply tonnes cereals commitment allocations food programme	1	ship tonnes feed wheat china month food aid cost british aid program mln stg overseas development administration wheat supplied grain exporter uk european obligation food aid convention pledged supply tonnes cereals commitment allocations food programme	0	0	0	0	1	3	1	0	1	2	8	6	6	7	9	4	9	0	6
national foodgrain target fixed mln tonnes apr mar unchanged target agriculture ministry annual report actual output estimated mln tonnes failure rains divisions country report targets crops estimated harvested crops brackets mln tonnes rice wheat coarse grains including sorghum failure rains maintain foodgrain production growing agricultural sector report strategy increasing irrigation potential…	1	national foodgrain target fixed mln tonnes apr mar unchanged target agriculture ministry annual report actual output estimated mln tonnes failure rains divisions country report targets crops estimated harvested crops brackets mln tonnes rice wheat coarse grains including sorghum failure rains maintain foodgrain production growing agricultural sector report strategy increasing irrigation potential…	0	0	0	0	1	0	1	0	1	2	8	6	6	7	9	4	9	0	6
kansas city commodity credit corp office preparing wheat roughly mln bushels scheduled released weeks ccc spokesman ccc stocks stored terminals pct stocks stored country elevators spokesman hard red winter wheat comprise bulk stocks spring wheat release tentative preparation spokesman	1	kansas city commodity credit corp office preparing wheat roughly mln bushels scheduled released weeks ccc spokesman ccc stocks stored terminals pct stocks stored country elevators spokesman hard red winter wheat comprise bulk stocks spring wheat release tentative preparation spokesman	0	0	0	4	5	3	7	7	9	10	4	2	2	6	5	12	12	14	15
european commission decision applications british government release tonnes intervention feed wheat british market june commission sources cereals management committee agreed release tonnes feed wheat weekly tenders april planned release tonnes april decided leave consideration release wheat british government applied release tonnes june british intervention stores prevent market prices rising so…	1	european commission decision applications british government release tonnes intervention feed wheat british market june commission sources cereals management committee agreed release tonnes feed wheat weekly tenders april planned release tonnes april decided leave consideration release wheat british government applied release tonnes june british intervention stores prevent market prices rising so…	0	0	0	0	1	3	1	0	1	2	8	6	6	7	9	4	9	0	12
agriculture department weekly crop report precipitation reported province week allowing grain progress rapidly south field preparation northern growing regions grains province weeks assuming weather remains dry planting progress advanced southeast pct spring wheat acres pct barley acres cereals plantings south central province southwest summer acres statistics canada projections report	1	agriculture department weekly crop report precipitation reported province week allowing grain progress rapidly south field preparation northern growing regions grains province weeks assuming weather remains dry planting progress advanced southeast pct spring wheat acres pct barley acres cereals plantings south central province southwest summer acres statistics canada projections report	0	0	0	4	5	3	7	7	5	8	7	3	3	2	12	11	17	11	11
agriculture department private exporters reported sales tonnes corn soviet union tonnes corn switched announced unknown destinations ussr corn delivery marketing fourth ussr term grain supply agreement usda department exporters reported corn sales tonnes delivery taiwan tonnes shipment season balance shipment marketing corn september sales corn ussr delivery fourth agreement september total mln t…	1	agriculture department private exporters reported sales tonnes corn soviet union tonnes corn switched announced unknown destinations ussr corn delivery marketing fourth ussr term grain supply agreement usda department exporters reported corn sales tonnes delivery taiwan tonnes shipment season balance shipment marketing corn september sales corn ussr delivery fourth agreement september total mln t…	0	0	0	0	1	3	1	0	1	2	8	6	6	7	9	4	9	15	6
sharp cuts planted acreage grain stockpile grain surpluses increasing agriculture department industry commodity analysts scenario stocks supply demand picture finally balance usda analyst usda prospective plantings report week farmers idle mln acres annual acreage reduction programs additional mln acres enrolled conservation reserve program bringing total idled acreage mln acres total mln acre cr…	1	sharp cuts planted acreage grain stockpile grain surpluses increasing agriculture department industry commodity analysts scenario stocks supply demand picture finally balance usda analyst usda prospective plantings report week farmers idle mln acres annual acreage reduction programs additional mln acres enrolled conservation reserve program bringing total idled acreage mln acres total mln acre cr…	0	0	0	4	5	0	7	7	5	8	7	3	3	2	12	2	17	15	3
ec commission cereals management committee rejected bids licences export free market spanish barley ec countries trade sources licence requests tonnes european currency units ecus tender special tender tonnes spanish barley sources bids licences free market soft wheat spanish barley exports ec countries	1	ec commission cereals management committee rejected bids licences export free market spanish barley ec countries trade sources licence requests tonnes european currency units ecus tender special tender tonnes spanish barley sources bids licences free market soft wheat spanish barley exports ec countries	0	0	0	0	1	3	1	8	3	6	3	1	11	4	14	9	11	6	12
brazil bought tonnes french wheat tender brazilian wheat board spokesman shipment accepted offers tonnes wheat dlrs fob tonne june shipment brazil bought tonnes dlrs fob tonne tender set april june july shipment spokesman	1	brazil bought tonnes french wheat tender brazilian wheat board spokesman shipment accepted offers tonnes wheat dlrs fob tonne june shipment brazil bought tonnes dlrs fob tonne tender set april june july shipment spokesman	0	0	0	0	1	3	1	0	1	2	8	6	6	7	9	4	9	0	12
argentine grain board preliminary figures crop export registrations grains oilseeds week april tonnes compared previous week comparable week earlier bread wheat nil nil nil maize sorghum nil soybean sunflowerseed nil nil cumulative figures export registrations crop april comparative figures crop april brackets thousands tonnes bread wheat maize sorghum soybean sunflowerseed	1	argentine grain board preliminary figures crop export registrations grains oilseeds week april tonnes compared previous week comparable week earlier bread wheat nil nil nil maize sorghum nil soybean sunflowerseed nil nil cumulative figures export registrations crop april comparative figures crop april brackets thousands tonnes bread wheat maize sorghum soybean sunflowerseed	0	0	0	0	1	3	1	0	1	2	8	6	6	7	9	4	9	0	12
grain ships loading waiting load orleans elevators trade sources elevator loading waiting continental grain mississippi river adm growmark grain elevator loading waiting st charles reserve elevator corp peavey st cargill grain cargill grain port allen	1	grain ships loading waiting load orleans elevators trade sources elevator loading waiting continental grain mississippi river adm growmark grain elevator loading waiting st charles reserve elevator corp peavey st cargill grain cargill grain port allen	0	0	0	4	5	3	7	7	5	8	7	3	3	3	3	11	4	11	11
canadian import tribunal countervailing duty corn imports cut canadian cts bushel dlrs bushel report canadian finance department tribunal duty hurting canadian farmers food processors duty imposed revenue department corn production subsidized government decide change duty	1	canadian import tribunal countervailing duty corn imports cut canadian cts bushel dlrs bushel report canadian finance department tribunal duty hurting canadian farmers food processors duty imposed revenue department corn production subsidized government decide change duty	0	0	0	4	5	1	7	7	5	8	7	3	3	2	12	2	17	15	16
canadian government expected week final ruling corn exports canada injured ontario corn growers government farm representatives deadline final determination march officials encouraged outcome covering european pasta imports canada decided pasta imports ten pct canadian market domestic producers corn exports represent pct canadian market canada dlrs bushel duty corn imports november reduced duty c…	1	canadian government expected week final ruling corn exports canada injured ontario corn growers government farm representatives deadline final determination march officials encouraged outcome covering european pasta imports canada decided pasta imports ten pct canadian market domestic producers corn exports represent pct canadian market canada dlrs bushel duty corn imports november reduced duty c…	0	1	0	4	5	3	7	7	5	8	7	3	3	2	12	2	17	15	16
house senate budget negotiators agreed budget accord reached yesterday cut billion dlrs fiscal spending agricultural programs congressional sources told reuters agreed cut farm programs compromise billion sought senate billion house negotiators agreed cut billion farm budget fiscal billion total billion saving sources agreement house senate agriculture committees difficult agriculture programs ac…	1	house senate budget negotiators agreed budget accord reached yesterday cut billion dlrs fiscal spending agricultural programs congressional sources told reuters agreed cut farm programs compromise billion sought senate billion house negotiators agreed cut billion farm budget fiscal billion total billion saving sources agreement house senate agriculture committees difficult agriculture programs ac…	1	1	1	4	5	2	7	7	5	8	7	3	3	2	12	2	2	2	13
agriculture department net change export commitments including sales foreign purchases cumulative exports current seasons week april comparisons tonnes prev week wheat corn soybeans soy cake meal soybean oil cotton minus total running bales totals reported commitments named unnamed destinations sales account optional origin sales actual exports respective marketing seasons usda reported outstandi…	1	agriculture department net change export commitments including sales foreign purchases cumulative exports current seasons week april comparisons tonnes prev week wheat corn soybeans soy cake meal soybean oil cotton minus total running bales totals reported commitments named unnamed destinations sales account optional origin sales actual exports respective marketing seasons usda reported outstandi…	0	0	0	0	1	3	1	0	1	2	8	6	6	7	9	4	9	0	12
indonesia rejected bank recommendations sweeping reforms farm economy foreign aid donors met billion dlrs grants soft loans agriculture minister affandi written remarks distributed foreign nations met hague argument bank free trade economy view weak bank called indonesia manages largest farm south east asia agricultural growth stagnating subsidies rice farming bank report rice production peaked s…	1	indonesia rejected bank recommendations sweeping reforms farm economy foreign aid donors met billion dlrs grants soft loans agriculture minister affandi written remarks distributed foreign nations met hague argument bank free trade economy view weak bank called indonesia manages largest farm south east asia agricultural growth stagnating subsidies rice farming bank report rice production peaked s…	1	1	3	1	2	4	7	7	5	8	7	8	9	11	11	14	13	11	13
louisiana weekly usda crop report days suitable soil moisture supplies rated pct adequate pct surplus winter wheat fair condition pct headed pct ago pct average corn pct planted pct ago pct average pct emerged avg spring pct completed pct ago pct avg	1	louisiana weekly usda crop report days suitable soil moisture supplies rated pct adequate pct surplus winter wheat fair condition pct headed pct ago pct average corn pct planted pct ago pct average pct emerged avg spring pct completed pct ago pct avg	0	0	1	4	5	6	5	6	5	8	7	8	9	11	11	6	13	13	8
french operators requested licences export tonnes free market barley tonnes maize tonnes free market bread wheat tonnes feed wheat ec tender trade sources barley rebates european currency units ecus tonne sought maize ecus bread wheat ecus feed wheat ecus barley rebates ecus requested total tonnes ecus tonnes rebates ecus tonne requested total tonnes maize ecus tonnes sources	1	french operators requested licences export tonnes free market barley tonnes maize tonnes free market bread wheat tonnes feed wheat ec tender trade sources barley rebates european currency units ecus tonne sought maize ecus bread wheat ecus feed wheat ecus barley rebates ecus requested total tonnes ecus tonnes rebates ecus tonne requested total tonnes maize ecus tonnes sources	0	0	0	0	1	3	1	0	1	2	8	6	6	7	9	4	9	0	12
brazil bought tonnes french wheat tender brazilian wheat board spokesman board accepted offers tonnes wheat grain firm dlrs tonne fob august shipment september shipment board bought tonnes dlrs tonne fob october shipment accepted tonnes dlrs tonne fob tender aug sept oct shipment set june spokesman	1	brazil bought tonnes french wheat tender brazilian wheat board spokesman board accepted offers tonnes wheat grain firm dlrs tonne fob august shipment september shipment board bought tonnes dlrs tonne fob october shipment accepted tonnes dlrs tonne fob tender aug sept oct shipment set june spokesman	0	0	0	0	1	3	1	0	1	2	8	6	6	7	9	4	9	0	12
volume contracts traded zealand futures exchange reached record contracts february international commodities clearing house icch previous contracts december icch contracts traded february billion dlrs contracts traded government bonds share price day bank bills day prime commercial paper dollar wheat	1	volume contracts traded zealand futures exchange reached record contracts february international commodities clearing house icch previous contracts december icch contracts traded february billion dlrs contracts traded government bonds share price day bank bills day prime commercial paper dollar wheat	0	2	1	2	0	2	4	3	6	0	5	5	4	9	7	3	14	16	0
ruling favor duty corn keen disappointment national corn growers association set dangerous nations follow mike hall association french corn growers charge ahead change corn corn feed complaint hall told reuters canadian government agency ruled farm policies causing injury canadian corn supported earlier imposed countervailing duty cts bushel political decision hall amount corn export canada unexp…	1	ruling favor duty corn keen disappointment national corn growers association set dangerous nations follow mike hall association french corn growers charge ahead change corn corn feed complaint hall told reuters canadian government agency ruled farm policies causing injury canadian corn supported earlier imposed countervailing duty cts bushel political decision hall amount corn export canada unexp…	0	0	0	4	5	3	7	7	5	8	7	3	3	2	12	2	17	15	16
intergrated generics biopharmaceutics subsidiary negotiations manufacturer distributor generic equivalents brand prescription drugs company successful agreement distribute anti anxiety drug market potential mln dlrs integrated anonymity time finalization agreement expected weeks company	1	intergrated generics biopharmaceutics subsidiary negotiations manufacturer distributor generic equivalents brand prescription drugs company successful agreement distribute anti anxiety drug market potential mln dlrs integrated anonymity time finalization agreement expected weeks company	0	2	2	3	3	0	5	6	2	7	0	0	0	0	0	0	6	12	7
european community ec sold tonnes soft wheat subsidized price dlrs tonne fob march delivery continuing bid establish brazilian wheat market agriculture department sale sharply undercut offer dlrs tonne fob tonnes wheat report export markets grains ec sales brazil total tonnes july june stark contrast tonnes season increasing presence ec wheat brazil time brazilian wheat board expects wheat import…	1	european community ec sold tonnes soft wheat subsidized price dlrs tonne fob march delivery continuing bid establish brazilian wheat market agriculture department sale sharply undercut offer dlrs tonne fob tonnes wheat report export markets grains ec sales brazil total tonnes july june stark contrast tonnes season increasing presence ec wheat brazil time brazilian wheat board expects wheat import…	0	0	0	0	1	3	1	0	1	2	8	6	6	7	9	4	9	0	6
commodity credit corporation ccc reallocated mln dlrs credit guarantees announced provide additional guarantees sales feedgrains oilseeds wheat south korea agriculture department department action increases feed grains mln dlrs mln oilseed mln dlrs mln wheat guarantee mln mln dlrs reduced commodities delivery current fiscal september	1	commodity credit corporation ccc reallocated mln dlrs credit guarantees announced provide additional guarantees sales feedgrains oilseeds wheat south korea agriculture department department action increases feed grains mln dlrs mln oilseed mln dlrs mln wheat guarantee mln mln dlrs reduced commodities delivery current fiscal september	0	0	0	4	5	0	5	6	9	10	4	0	0	0	0	0	12	9	7
soviet union heavy buyer yugoslav corn october purchasing close mln tonnes marketing report agriculture counselor belgrade mln tonnes yugoslav corn committed foreign buyers sold soviet union yugoslav grain association reported official report dated march official tonnes corn delivered balance tonnes shipped june additional tonnes corn shipped july september grain total yugoslav corn exports reach…	1	soviet union heavy buyer yugoslav corn october purchasing close mln tonnes marketing report agriculture counselor belgrade mln tonnes yugoslav corn committed foreign buyers sold soviet union yugoslav grain association reported official report dated march official tonnes corn delivered balance tonnes shipped june additional tonnes corn shipped july september grain total yugoslav corn exports reach…	0	0	0	0	1	3	1	0	1	2	8	6	6	7	9	4	17	15	6
soviet union tonnes previous purchases corn purchases agriculture department export sales report covering transactions week march department destinations tonnes corn soviet union reported tonnes transaction reported daily reporting system total corn commitments delivery fourth ussr grain supply agreement amount tonnes	1	soviet union tonnes previous purchases corn purchases agriculture department export sales report covering transactions week march department destinations tonnes corn soviet union reported tonnes transaction reported daily reporting system total corn commitments delivery fourth ussr grain supply agreement amount tonnes	0	0	0	0	1	3	1	0	1	2	8	6	6	7	9	4	9	0	6
agriculture department forecast coarse grain crop mln tonnes mln tonnes month estimated crop mln tonnes mln month usda forecast wheat crop mln tonnes mln tonnes month crop projected mln tonnes mln month usda forecast argentine coarse grain exports mln tonnes mln tonnes month projected exports mln tonnes mln month	1	agriculture department forecast coarse grain crop mln tonnes mln tonnes month estimated crop mln tonnes mln month usda forecast wheat crop mln tonnes mln tonnes month crop projected mln tonnes mln month usda forecast argentine coarse grain exports mln tonnes mln tonnes month projected exports mln tonnes mln month	0	0	0	0	1	0	1	0	1	2	8	6	6	7	9	4	0	0	6
commodity credit corporation late friday county price differentials pik corn redemptions traded louisiana gulf ccc spokesman kansas city agricultural stabilization conservation service ascs office adjusted differentials adjustments march represent increase original differentials lower differential adjustments differentials cents ccc cent cents add cents cts add cts cts add cts cts add cts drop ba…	1	commodity credit corporation late friday county price differentials pik corn redemptions traded louisiana gulf ccc spokesman kansas city agricultural stabilization conservation service ascs office adjusted differentials adjustments march represent increase original differentials lower differential adjustments differentials cents ccc cent cents add cents cts add cts cts add cts cts add cts drop ba…	0	2	2	4	3	1	0	4	4	5	1	4	5	5	4	13	5	8	5
exports commodities start current seasons april comparisons reported usda exporters tonnes prev wk wheat soybeans corn sorghum soybean oil soybean meal cotton tonnes corn tonnes sorghum reflect change marketing sept aug	1	exports commodities start current seasons april comparisons reported usda exporters tonnes prev wk wheat soybeans corn sorghum soybean oil soybean meal cotton tonnes corn tonnes sorghum reflect change marketing sept aug	0	0	0	0	1	3	1	0	1	2	8	6	6	7	9	4	9	0	6
proposal house democrats target government farm benefits medium sized farms received democrats house subcommittee balance idea rep dan glickman kan chairman house agriculture subcommittee wheat feedgrains soybeans hard constructive proposal coming alternative reagan farm proposal plan offered penny minn raise target prices wheat dlrs bushel corn dlrs producers receive deficiency payments pct norm…	1	proposal house democrats target government farm benefits medium sized farms received democrats house subcommittee balance idea rep dan glickman kan chairman house agriculture subcommittee wheat feedgrains soybeans hard constructive proposal coming alternative reagan farm proposal plan offered penny minn raise target prices wheat dlrs bushel corn dlrs producers receive deficiency payments pct norm…	0	0	0	4	5	3	7	7	5	8	7	3	3	2	12	2	2	2	13
top leader china import mln tonnes grain ming newspaper hong kong customs figures china imported mln tonnes grain mln record mln newspaper quoted grain output key issues influence development economy context remarks grain production target mln mln newspaper quoted situation reached pigs fed grain increases output slowed economic planning agriculture proper reach target mln tonnes avoid situation …	1	top leader china import mln tonnes grain ming newspaper hong kong customs figures china imported mln tonnes grain mln record mln newspaper quoted grain output key issues influence development economy context remarks grain production target mln mln newspaper quoted situation reached pigs fed grain increases output slowed economic planning agriculture proper reach target mln tonnes avoid situation …	0	0	0	0	1	0	5	6	1	7	0	0	0	0	0	0	0	9	7
french maize producers ec commission grant permanent maize export rebates ec accord annual export quota mln tonnes maize spain french maize producers association commission decided accord rebates export tonnes french maize rebates tonnes granted request export certificates granted tonnes association request cover exports destinations adding soviet union maize excluded list destination countries t…	1	french maize producers ec commission grant permanent maize export rebates ec accord annual export quota mln tonnes maize spain french maize producers association commission decided accord rebates export tonnes french maize rebates tonnes granted request export certificates granted tonnes association request cover exports destinations adding soviet union maize excluded list destination countries t…	0	0	0	0	1	3	1	0	1	2	8	6	6	7	9	4	9	0	12
european community ec considers talks agricultural trade reform talks trade reform gatt round willy de clercq external relations commissioner ec told reporters ec bow pressure reach agreement agricultural trade ec stick schedule agreed agreement tariffs trade gatt punta del este uruguay included agricultural trade liberalisation time lengthy program negotiate gatt trade issues discussed current g…	11	european community ec considers talks agricultural trade reform talks trade reform gatt round willy de clercq external relations commissioner ec told reporters ec bow pressure reach agreement agricultural trade ec stick schedule agreed agreement tariffs trade gatt punta del este uruguay included agricultural trade liberalisation time lengthy program negotiate gatt trade issues discussed current g…	1	1	3	1	2	4	3	8	3	6	3	1	11	4	14	1	16	1	17
bank president barber conable called japan boost investment developing nations sake economy japan major contribution development told japanese businessmen pleased additional support pct total banking assets japan assist indebted countries develop roads infrastructure conable additional commercial bank investment advantage profit huge trade surplus economies notably south america china india expan…	11	bank president barber conable called japan boost investment developing nations sake economy japan major contribution development told japanese businessmen pleased additional support pct total banking assets japan assist indebted countries develop roads infrastructure conable additional commercial bank investment advantage profit huge trade surplus economies notably south america china india expan…	1	1	3	1	2	4	3	1	0	1	2	8	9	11	11	14	13	13	17
customs cleared trade surplus days february jumped billion dlrs billion earlier finance ministry february interim surplus sharply mln dlr surplus january period fob exports rose pct earlier days february billion cif imports fell pct billion average dollar yen rates exports imports exports imports earlier	11	customs cleared trade surplus days february jumped billion dlrs billion earlier finance ministry february interim surplus sharply mln dlr surplus january period fob exports rose pct earlier days february billion cif imports fell pct billion average dollar yen rates exports imports exports imports earlier	1	1	1	2	0	2	4	3	6	0	5	5	4	9	7	3	14	16	0
external trade grew pct quarter pct decline period pct growth previous quarter trade development board exports period rose pct billion dlrs imports pct billion trade deficit billion billion deficit period billion deficit growth attributed strength oil trade computers computer electronic components	11	external trade grew pct quarter pct decline period pct growth previous quarter trade development board exports period rose pct billion dlrs imports pct billion trade deficit billion billion deficit period billion deficit growth attributed strength oil trade computers computer electronic components	1	1	1	2	0	2	4	3	6	0	5	5	4	9	7	3	14	16	0
leading industrial organisation send buying mission effort reduce trade surplus washington spokesman chinese national federation industries told reuters mission broader plan switch purchases japan federation major industrial associations purchased billion dlrs worth industrial products japan billion spokesman federation discussing volume business transfer america drawn list industrial products sh…	11	leading industrial organisation send buying mission effort reduce trade surplus washington spokesman chinese national federation industries told reuters mission broader plan switch purchases japan federation major industrial associations purchased billion dlrs worth industrial products japan billion spokesman federation discussing volume business transfer america drawn list industrial products sh…	1	1	1	2	0	2	4	3	6	0	5	5	4	9	7	3	14	16	0
february monthly merchandise trade figures reported tuesday commerce department basis reflecting data avoiding future revisions monthly figure commerce officials january deficit billion dlrs revised february figure final officials initial monthly figure revised subsequent months time lag report compiling final estimates imports exports reporting february trade data delayed weeks permit gathering …	11	february monthly merchandise trade figures reported tuesday commerce department basis reflecting data avoiding future revisions monthly figure commerce officials january deficit billion dlrs revised february figure final officials initial monthly figure revised subsequent months time lag report compiling final estimates imports exports reporting february trade data delayed weeks permit gathering …	1	1	1	2	0	2	4	3	6	0	5	5	4	9	7	3	14	16	0
taiwan relax import controls foreign items including books effort trading partners access markets taiwan announced easing import curbs farm industrial products month council economic planning development spokesman told reuters move intended balance trade taiwan trading partners trade surplus reached record billion dlrs billion january taiwan cut import tariffs foreign products allowed imports win…	11	taiwan relax import controls foreign items including books effort trading partners access markets taiwan announced easing import curbs farm industrial products month council economic planning development spokesman told reuters move intended balance trade taiwan trading partners trade surplus reached record billion dlrs billion january taiwan cut import tariffs foreign products allowed imports win…	1	1	1	2	0	2	4	3	6	0	5	5	4	9	7	3	14	16	0
leading industrial nations reviewing paris agreement stabilize exchange rates foster increased worldwide growth reduce trade imbalances accord successful senior treasury official paris accord reviewed meeting successful continues senior treasury official told reporters briefing ahead imf bank meetings west germany japan bolster economic growth official surplus countries west germany japan deficit…	11	leading industrial nations reviewing paris agreement stabilize exchange rates foster increased worldwide growth reduce trade imbalances accord successful senior treasury official paris accord reviewed meeting successful continues senior treasury official told reporters briefing ahead imf bank meetings west germany japan bolster economic growth official surplus countries west germany japan deficit…	1	1	3	1	2	4	3	1	0	1	2	11	10	8	2	14	16	1	17
text statement japan west germany france britain italy canada issued washington meeting yesterday finance ministers central bank governors major industrial countries met continued process multilateral surveillance economies pursuant arrangements strengthened economic policy coordination agreed tokyo summit heads government managing director international monetary fund meeting ministers governors …	11	text statement japan west germany france britain italy canada issued washington meeting yesterday finance ministers central bank governors major industrial countries met continued process multilateral surveillance economies pursuant arrangements strengthened economic policy coordination agreed tokyo summit heads government managing director international monetary fund meeting ministers governors …	1	1	3	1	2	4	3	1	0	1	2	11	10	8	2	14	16	1	17
tough trade sanctions president reagan imposed japanese exports shot bow sign reagan attack unfair trade practices worldwide officials robert crandall trade specialist institution tank shot bow result shot left united retaliation officials pct tariffs reagan mln dlrs worth japanese congress tough pro trade stand existing laws protectionist legislation tough trade action european community corn so…	11	tough trade sanctions president reagan imposed japanese exports shot bow sign reagan attack unfair trade practices worldwide officials robert crandall trade specialist institution tank shot bow result shot left united retaliation officials pct tariffs reagan mln dlrs worth japanese congress tough pro trade stand existing laws protectionist legislation tough trade action european community corn so…	1	1	3	1	2	4	3	1	0	1	2	11	10	8	2	1	16	1	18
australian treasurer paul keating expects current account deficit billion dlrs lower billion forecast august budget keating told dinner mln dlr deficit billion expectations bring current account billion billion dollars forecast budget keating lower current account deficit fall proportion gdp australia posted billion dlr current account deficit keating monthly figures encouraging trend keating gov…	11	australian treasurer paul keating expects current account deficit billion dlrs lower billion forecast august budget keating told dinner mln dlr deficit billion expectations bring current account billion billion dollars forecast budget keating lower current account deficit fall proportion gdp australia posted billion dlr current account deficit keating monthly figures encouraging trend keating gov…	1	1	1	2	0	2	4	3	6	0	5	5	4	9	7	3	14	16	0
british foreign secretary sir geoffrey howe called industrial developing countries combat trade protectionism remove barriers free trading agricultural products howe address annual meeting economic social commission asia pacific success fighting protectionism current uruguay round agreement tariffs trade britain committed resisting protectionism free trade vital britain pct gnp trade services how…	11	british foreign secretary sir geoffrey howe called industrial developing countries combat trade protectionism remove barriers free trading agricultural products howe address annual meeting economic social commission asia pacific success fighting protectionism current uruguay round agreement tariffs trade britain committed resisting protectionism free trade vital britain pct gnp trade services how…	1	1	3	1	2	4	3	1	0	1	2	11	10	8	2	1	16	1	17
trade deficit totalled mln dlrs months figures released statistics bureau china news agency quoted bureau foreign trade totalled billion dlrs period exports worth billion dlrs bureau total trade volume pct period exports pct comparative figures trade deficit totalled billion dlrs official figures	11	trade deficit totalled mln dlrs months figures released statistics bureau china news agency quoted bureau foreign trade totalled billion dlrs period exports worth billion dlrs bureau total trade volume pct period exports pct comparative figures trade deficit totalled billion dlrs official figures	1	1	1	2	0	2	4	3	6	0	5	5	4	9	7	3	14	16	0
countries eastern southern africa agreed cut tariffs regional trade pct statement preferential trade pta seeks create common market stretching north south governments tariff cut assess impact tariff reductions timetable complete elimination barriers trade pta set kenya tanzania uganda zambia zimbabwe pta sources agreement split progress free trade weaker concerned effects customs revenue reductio…	11	countries eastern southern africa agreed cut tariffs regional trade pct statement preferential trade pta seeks create common market stretching north south governments tariff cut assess impact tariff reductions timetable complete elimination barriers trade pta set kenya tanzania uganda zambia zimbabwe pta sources agreement split progress free trade weaker concerned effects customs revenue reductio…	1	1	3	1	2	4	3	1	0	1	2	11	10	8	2	1	16	1	18
japan isolated europe feel japanese promises switch export domestic led growth officials businessmen dollar slipped record low yen japanese exporters holders dollar investments harder finance minister kiichi miyazawa perception japan promise deep centres key maekawa report april document prepared private committee formed prime minister yasuhiro nakasone led bank japan head haruo maekawa recommend…	11	japan isolated europe feel japanese promises switch export domestic led growth officials businessmen dollar slipped record low yen japanese exporters holders dollar investments harder finance minister kiichi miyazawa perception japan promise deep centres key maekawa report april document prepared private committee formed prime minister yasuhiro nakasone led bank japan head haruo maekawa recommend…	1	1	3	1	2	4	3	1	0	1	10	10	8	13	13	5	8	17	4
president reagan expected prime minister yasuhiro nakasone week lift trade sanctions japan june york times newspaper quoting administration officials scenario president june economic summit meeting venice hoped lift restrictions electronics imports month japan stopped semiconductors widened access japan chip producers administration imposed pct tariffs mln dlrs worth japanese color television set…	11	president reagan expected prime minister yasuhiro nakasone week lift trade sanctions japan june york times newspaper quoting administration officials scenario president june economic summit meeting venice hoped lift restrictions electronics imports month japan stopped semiconductors widened access japan chip producers administration imposed pct tariffs mln dlrs worth japanese color television set…	1	1	3	1	2	4	3	1	0	1	10	10	8	13	13	5	8	17	4
south korea cut loans exporting companies reduce growing trade surplus united european community finance ministry officials billion dlrs worth foreign currency loans firms import industrial facilities mln dlrs importing raw materials exporters received won dlrs worth overseas won dlrs officials government stopped bank loans aid installation export oriented facilities largest business finance mini…	11	south korea cut loans exporting companies reduce growing trade surplus united european community finance ministry officials billion dlrs worth foreign currency loans firms import industrial facilities mln dlrs importing raw materials exporters received won dlrs worth overseas won dlrs officials government stopped bank loans aid installation export oriented facilities largest business finance mini…	1	1	1	2	0	2	4	3	6	0	5	5	4	9	7	3	6	16	0
house committee completed action legislation toughen trade laws chairman dan rostenkowski consideration controversial provisions plan force major trade surplus countries cut trade imbalance united deferred house considers trade bill sponsor rep richard gephardt gephardt missouri democrat told reuters exact form trade surplus reduction proposal house approved plan force pct surplus cutback countri…	11	house committee completed action legislation toughen trade laws chairman dan rostenkowski consideration controversial provisions plan force major trade surplus countries cut trade imbalance united deferred house considers trade bill sponsor rep richard gephardt gephardt missouri democrat told reuters exact form trade surplus reduction proposal house approved plan force pct surplus cutback countri…	1	1	3	1	2	4	3	1	0	1	2	11	10	8	2	1	2	2	18
debt african countries continue grow economies remain developed countries lower rates nigerian trade minister told informal meeting agreement tariffs trade widening gap industrialized developing countries unfair international economic system major obstacles growth developing countries emphasize growth volume external indebtedness african countries reflects deflationary monetary trade policies dev…	11	debt african countries continue grow economies remain developed countries lower rates nigerian trade minister told informal meeting agreement tariffs trade widening gap industrialized developing countries unfair international economic system major obstacles growth developing countries emphasize growth volume external indebtedness african countries reflects deflationary monetary trade policies dev…	1	1	3	1	2	4	3	1	0	1	2	11	10	8	2	14	16	1	17
cbt soybean futures expected steady easier disappointing weekly soybean export figure previous week ago levels moderate country movement overnight traders outlook increased brazilian harvest pressure month settlement brazilian seamen strike add negative sentiment crop soybean harvest pct complete april compared average pct newsletter rio grande sul pct pct parana pct grosso sul pct grosso pct pct…	11	cbt soybean futures expected steady easier disappointing weekly soybean export figure previous week ago levels moderate country movement overnight traders outlook increased brazilian harvest pressure month settlement brazilian seamen strike add negative sentiment crop soybean harvest pct complete april compared average pct newsletter rio grande sul pct pct parana pct grosso sul pct grosso pct pct…	0	0	0	2	4	0	5	6	2	4	9	8	9	11	11	6	13	13	8
short term foreign exchange rate movements correcting international trade imbalances appears term efforts required cut dependence external demand bank japan monthly report trade surplus nominal terms remain future central bank fundamental adjustments japan hopes benefit international allocation resources maintain free trade system	11	short term foreign exchange rate movements correcting international trade imbalances appears term efforts required cut dependence external demand bank japan monthly report trade surplus nominal terms remain future central bank fundamental adjustments japan hopes benefit international allocation resources maintain free trade system	1	1	3	1	2	4	3	1	0	1	2	11	10	8	2	14	16	1	17
basic reform protected farm sector key shifting economy export domestic led growth vital step trim trade surplus securities analysts farm sector protected import tariffs quotas subsidies price supports tax system ample change economic terms reform christopher brokerage firm james capel ultimate cost existing system food prices europe times analysts spending food accounts quarter average budget ro…	11	basic reform protected farm sector key shifting economy export domestic led growth vital step trim trade surplus securities analysts farm sector protected import tariffs quotas subsidies price supports tax system ample change economic terms reform christopher brokerage firm james capel ultimate cost existing system food prices europe times analysts spending food accounts quarter average budget ro…	1	1	3	1	2	4	3	1	0	1	7	8	9	11	1	14	1	13	13
yugoslav trade declining rapidly hard currency terms federal statistics office fso figures fso figures total exports january march valued billion dinars compared billion dinars period figures pct dollar terms exchange rate fluctuations figures calculated fso sources current exchange rates time fixed rate dinars dollar belgrade march yugoslav trade declining rapidly hard currency terms federal sta…	11	yugoslav trade declining rapidly hard currency terms federal statistics office fso figures fso figures total exports january march valued billion dinars compared billion dinars period figures pct dollar terms exchange rate fluctuations figures calculated fso sources current exchange rates time fixed rate dinars dollar belgrade march yugoslav trade declining rapidly hard currency terms federal sta…	1	1	1	2	0	2	4	3	6	0	5	5	4	9	7	3	14	16	0
application join agreement tariffs trade gatt test soviet union demand follow china top european community official willy de clercq external relations commissioner european communities told news conference application involve difficult negotiations china formally applied join gatt july february memorandum application de clercq studied questions china china trading countries including soviet union…	11	application join agreement tariffs trade gatt test soviet union demand follow china top european community official willy de clercq external relations commissioner european communities told news conference application involve difficult negotiations china formally applied join gatt july february memorandum application de clercq studied questions china china trading countries including soviet union…	1	1	3	1	2	4	3	8	3	6	3	1	11	4	14	9	16	1	14
trade gap expected widen fiscal july government relaxed restrictions imports including cars country set export target billion dlrs imports billion dlrs compared billion dlrs export earnings billion dlrs imports commerce minister abdul aimed encouraging export oriented industries boost foreign exchange earnings imports essential machinery raw materials increase industrial production government eas…	11	trade gap expected widen fiscal july government relaxed restrictions imports including cars country set export target billion dlrs imports billion dlrs compared billion dlrs export earnings billion dlrs imports commerce minister abdul aimed encouraging export oriented industries boost foreign exchange earnings imports essential machinery raw materials increase industrial production government eas…	1	1	1	2	0	2	4	3	6	0	5	5	4	9	7	3	14	16	0
rising imports japanese cars electronic upset west european officials prepared stay trade row united japan huge trade surplus west europe united charges unfair trade practices involving computer microchips leave europeans cold european community billion dlr trade deficit japan seeks redress feels japanese trade policy europeans diplomats economists britain suggestion acting huge trade surplus ec …	11	rising imports japanese cars electronic upset west european officials prepared stay trade row united japan huge trade surplus west europe united charges unfair trade practices involving computer microchips leave europeans cold european community billion dlr trade deficit japan seeks redress feels japanese trade policy europeans diplomats economists britain suggestion acting huge trade surplus ec …	1	1	3	1	2	4	3	1	0	1	3	1	11	4	14	9	11	6	14
semiconductor industry association urged government impose trade sanctions japan violating japan semiconductor trade agreement letter treasury secretary james baker sanctions imposed japanese chipmakers april continue united satisfied compliance agreement action japan cut semiconductor exports required require agreements industries bear burden persistent unwillingness inability government japan d…	11	semiconductor industry association urged government impose trade sanctions japan violating japan semiconductor trade agreement letter treasury secretary james baker sanctions imposed japanese chipmakers april continue united satisfied compliance agreement action japan cut semiconductor exports required require agreements industries bear burden persistent unwillingness inability government japan d…	1	1	3	1	2	4	3	1	0	1	10	10	8	13	13	5	8	17	4
commerce secretary malcolm baldrige united stand japan dominate electronics market baldrige told senate finance committee united insist japan markets products market japanese products testimony meant united close markets japan baldrige prepared alternatives studied baldrige testimony japan closed supercomputer market restricted telecommunications market conclude common objective japanese governme…	11	commerce secretary malcolm baldrige united stand japan dominate electronics market baldrige told senate finance committee united insist japan markets products market japanese products testimony meant united close markets japan baldrige prepared alternatives studied baldrige testimony japan closed supercomputer market restricted telecommunications market conclude common objective japanese governme…	1	1	3	1	2	4	3	1	0	1	10	10	8	13	13	5	8	17	4
british government licences selected japanese banks securities companies operating financial city renewal summer progress markets foreign competition government sources licences considered official comments government formally urged cross influential mps joint retaliatory action united japan britain grown increasingly japanese trade practices sense urgency emphasis securing undermining japan gove…	11	british government licences selected japanese banks securities companies operating financial city renewal summer progress markets foreign competition government sources licences considered official comments government formally urged cross influential mps joint retaliatory action united japan britain grown increasingly japanese trade practices sense urgency emphasis securing undermining japan gove…	1	1	3	1	2	4	3	1	0	1	10	10	8	13	13	5	8	17	4
prime minister yasuhiro nakasone dealt political blow renewed rapid rise threat trade war united political analysts nakasone fire tax reform plan forced june economic summit industrialised nations local elections month candidates ruling liberal democratic party ldp close relationship nakasone president reagan element power base university political science professor told reuters emergence critici…	11	prime minister yasuhiro nakasone dealt political blow renewed rapid rise threat trade war united political analysts nakasone fire tax reform plan forced june economic summit industrialised nations local elections month candidates ruling liberal democratic party ldp close relationship nakasone president reagan element power base university political science professor told reuters emergence critici…	1	1	3	1	2	4	3	1	0	1	10	10	8	13	13	5	8	17	4
commerce secretary malcolm baldrige predicted congress pass reasonable trade bill tough protectionist legislation prompt trade war mood congress tough trade washington baldrige weekend television interview reasonable trade bill spite congress administration trade attitude president reagan opposes protectionist legislation agreed support trade bill apparent opposition democrats pass legislation ba…	11	commerce secretary malcolm baldrige predicted congress pass reasonable trade bill tough protectionist legislation prompt trade war mood congress tough trade washington baldrige weekend television interview reasonable trade bill spite congress administration trade attitude president reagan opposes protectionist legislation agreed support trade bill apparent opposition democrats pass legislation ba…	1	1	3	1	2	4	3	1	0	1	2	11	10	8	2	1	16	1	18
key house panel voted greatly ease government controls exports house committees moved rapidly approval major trade laws hope solve trade house foreign affairs subcommittee international economic policy voted direct administration cut list controlled exports cent removing items considered military security industries complained losing sales foreign competitors allowed export freely products compan…	11	key house panel voted greatly ease government controls exports house committees moved rapidly approval major trade laws hope solve trade house foreign affairs subcommittee international economic policy voted direct administration cut list controlled exports cent removing items considered military security industries complained losing sales foreign competitors allowed export freely products compan…	1	1	3	1	2	4	3	1	0	1	2	11	10	8	2	1	2	2	18
philippines trade industry secretary jose concepcion told trade ministers agreement real european community ec imposed levy vegetable oils concepcion speaking informal meeting agreement tariffs trade gatt ministers declared uruguay september trade developed nations disrupted ec request lower tariffs coconut oil introduced levy vegetable oils fats vital exports southeast asian countries concepcion…	11	philippines trade industry secretary jose concepcion told trade ministers agreement real european community ec imposed levy vegetable oils concepcion speaking informal meeting agreement tariffs trade gatt ministers declared uruguay september trade developed nations disrupted ec request lower tariffs coconut oil introduced levy vegetable oils fats vital exports southeast asian countries concepcion…	1	1	3	1	2	4	3	8	3	6	3	1	11	4	14	9	11	6	14
canada trade surplus billion dlrs february compared upward revised mln dlrs surplus january statistics canada january surplus originally reported mln dlrs february surplus mln dlrs february exports seasonally adjusted billion dlrs billion january billion february february imports billion dlrs billion january billion february	11	canada trade surplus billion dlrs february compared upward revised mln dlrs surplus january statistics canada january surplus originally reported mln dlrs february surplus mln dlrs february exports seasonally adjusted billion dlrs billion january billion february february imports billion dlrs billion january billion february	1	1	1	2	0	2	4	3	6	0	5	5	4	9	7	3	14	16	0
south korean foreign trade minister bae firms agreed buy billion dlrs worth week buying trip united purchases represented shifts japanese firms firms south effort reduce billion dlr trade surplus united south korea billion dlr trade deficit japan	11	south korean foreign trade minister bae firms agreed buy billion dlrs worth week buying trip united purchases represented shifts japanese firms firms south effort reduce billion dlr trade surplus united south korea billion dlr trade deficit japan	1	1	1	2	0	2	4	3	6	0	5	5	4	9	7	3	14	16	18
japanese finance minister kiichi miyazawa told press conference expects trade deficit eventually start reflecting economic fundamentals influence exchange rates minister referring trade data released washington miyazawa told major industrial nations washington week exchange rates earlier washington current exchange rates levels implied february paris currency accord	11	japanese finance minister kiichi miyazawa told press conference expects trade deficit eventually start reflecting economic fundamentals influence exchange rates minister referring trade data released washington miyazawa told major industrial nations washington week exchange rates earlier washington current exchange rates levels implied february paris currency accord	1	1	3	1	2	4	3	1	0	1	2	11	10	8	2	14	16	1	17
textile exports quarter reached record billion dlrs increase pct earlier period daily overseas edition country breakdown largest markets textiles commerce secretary malcolm baldrige told press conference chinese textile apparel exports rose pct level rate growth sustainable equitable major foreign suppliers china united largest textile supplier baldrige declined acceptable growth rate chinese tex…	11	textile exports quarter reached record billion dlrs increase pct earlier period daily overseas edition country breakdown largest markets textiles commerce secretary malcolm baldrige told press conference chinese textile apparel exports rose pct level rate growth sustainable equitable major foreign suppliers china united largest textile supplier baldrige declined acceptable growth rate chinese tex…	1	1	1	2	0	2	4	3	6	0	5	8	9	11	11	6	13	13	8
taiwan revised extended textile export agreement negotiations washington week spokesman taiwan textile federation charles chen told reuters original accord extended agreed raise limit annual growth textile apparel exports pct pct calendar accord fair breathing space textile makers diversify exports nations chen revised agreement taiwan textile exporting terms hong kong south korea taiwanese firms…	11	taiwan revised extended textile export agreement negotiations washington week spokesman taiwan textile federation charles chen told reuters original accord extended agreed raise limit annual growth textile apparel exports pct pct calendar accord fair breathing space textile makers diversify exports nations chen revised agreement taiwan textile exporting terms hong kong south korea taiwanese firms…	1	1	1	2	0	2	4	3	6	0	5	8	9	11	11	6	13	13	8
terms trade fell pct fourth quarter declining pct quarter pct earlier statistics bureau seasonally adjusted current account deficit billion dlrs quarter dropped mln terms trade decline fourth quarter decline pct fall export prices pct rise import prices bureau terms trade fallen pct fourth quarter	11	terms trade fell pct fourth quarter declining pct quarter pct earlier statistics bureau seasonally adjusted current account deficit billion dlrs quarter dropped mln terms trade decline fourth quarter decline pct fall export prices pct rise import prices bureau terms trade fallen pct fourth quarter	0	1	1	2	0	2	4	3	6	0	5	8	9	11	11	6	13	13	8
taiwanese investment expected double mln dlrs calendar rise mln dlrs forecast economic ministry taiwanese investment totalled mln dlrs ministry document investment electronics trading food service industries lee ming deputy director industrial development investment centre forecast rise planned government incentives growing willingness taiwanese invest abroad lee told reuters incentives introduce…	11	taiwanese investment expected double mln dlrs calendar rise mln dlrs forecast economic ministry taiwanese investment totalled mln dlrs ministry document investment electronics trading food service industries lee ming deputy director industrial development investment centre forecast rise planned government incentives growing willingness taiwanese invest abroad lee told reuters incentives introduce…	0	1	1	2	0	0	5	6	2	7	0	0	0	0	0	0	6	9	7
summit petroleum corp sold mln shares pct common stock lt halbert associates company shares held lt consolidated energy corp oil gas lt addition david halbert president chief executive officer halbert investment firm named chairman chief executive summit company halbert charles bruce james named directors expanding board summit company president chief executive lt allied comprehensive health bruc…	11	summit petroleum corp sold mln shares pct common stock lt halbert associates company shares held lt consolidated energy corp oil gas lt addition david halbert president chief executive officer halbert investment firm named chairman chief executive summit company halbert charles bruce james named directors expanding board summit company president chief executive lt allied comprehensive health bruc…	0	2	2	3	4	6	2	2	7	4	9	7	1	1	8	10	3	12	1
australian beef output forecast decline mln tonnes weight mln mln australian meat live stock corp amlc exports beef predicted decline tonnes shipped weight rally amlc summary bi annual meat livestock forecasts cattle remaining level mln herd expected slower forecast beef producers confident returns market domestically overseas continue amlc slow herd build forecast lower production expected bring…	11	australian beef output forecast decline mln tonnes weight mln mln australian meat live stock corp amlc exports beef predicted decline tonnes shipped weight rally amlc summary bi annual meat livestock forecasts cattle remaining level mln herd expected slower forecast beef producers confident returns market domestically overseas continue amlc slow herd build forecast lower production expected bring…	0	0	0	0	1	0	5	6	2	7	0	8	9	11	11	6	13	13	8
house speaker jim wright dismissed charges trade bill congress contributed fall stock prices wall street ridiculous texas democrat told reporters treasury secretary james baker administration officials weekend pending legislation brand protectionist key factor record setting drop	11	house speaker jim wright dismissed charges trade bill congress contributed fall stock prices wall street ridiculous texas democrat told reporters treasury secretary james baker administration officials weekend pending legislation brand protectionist key factor record setting drop	1	1	3	1	2	4	3	1	0	1	2	11	10	8	2	1	2	2	18
japan agreed drop barriers american caught shipments reach mln dlrs annually trade representative clayton yeutter announced yeutter accord reached extensive bilateral negotiations earlier tokyo commerce department estimated shipments processed products rise mln dlrs mln dlrs annually assessment current shipments officials pact lift quotas americans ship japanese firms time yeutter washington temp…	11	japan agreed drop barriers american caught shipments reach mln dlrs annually trade representative clayton yeutter announced yeutter accord reached extensive bilateral negotiations earlier tokyo commerce department estimated shipments processed products rise mln dlrs mln dlrs annually assessment current shipments officials pact lift quotas americans ship japanese firms time yeutter washington temp…	1	1	3	1	2	4	3	1	0	1	10	10	8	13	13	5	8	17	17
visible trade deficit narrowed seasonally adjusted provisional mln stg february mln january trade industry department current account balance payments february seasonally adjusted provisional surplus mln stg compared surplus mln january invisibles february provisionally mln surplus january seasonally adjusted imports rose february billion stg billion january exports rose record billion month bill…	11	visible trade deficit narrowed seasonally adjusted provisional mln stg february mln january trade industry department current account balance payments february seasonally adjusted provisional surplus mln stg compared surplus mln january invisibles february provisionally mln surplus january seasonally adjusted imports rose february billion stg billion january exports rose record billion month bill…	0	1	1	2	0	2	4	3	6	0	5	5	4	9	7	3	14	16	0
pursue complaint european governments unfairly airbus industrie aircraft consortium proceedings gatt civil aircraft committee gatt spokesman time aircraft committee agreement tariffs trade gatt special day session gatt rules cover pct commerce committee agreed debate complaint starting informal consultations holding special session july trade officials tension eased permanent trade ambassador eur…	11	pursue complaint european governments unfairly airbus industrie aircraft consortium proceedings gatt civil aircraft committee gatt spokesman time aircraft committee agreement tariffs trade gatt special day session gatt rules cover pct commerce committee agreed debate complaint starting informal consultations holding special session july trade officials tension eased permanent trade ambassador eur…	1	1	3	1	2	4	3	8	3	6	2	11	10	8	2	1	16	1	17
private investment protection textile industry competitive modern foreign producers analysts congressional agencies office technology assessment arm congress told house trade subcommittee hearing concern future textile apparel industry reason optimism ago textile producers investments analyst henry congressional budget office budget analysis arm congress federal loans loan guarantees options cong…	11	private investment protection textile industry competitive modern foreign producers analysts congressional agencies office technology assessment arm congress told house trade subcommittee hearing concern future textile apparel industry reason optimism ago textile producers investments analyst henry congressional budget office budget analysis arm congress federal loans loan guarantees options cong…	1	1	3	1	2	4	3	1	0	1	2	11	10	8	2	1	2	2	18
trade representative clayton yeutter trade issues japanese relations resolved countries trade talks late april level discussions issues united relationship strained japan moment relieve strains earliest wait late april yeutter zealand day informal meeting trade ministers reviewing uruguay round agreement trade tariffs gatt meet japanese delegation days declined methods relieving strain countries …	11	trade representative clayton yeutter trade issues japanese relations resolved countries trade talks late april level discussions issues united relationship strained japan moment relieve strains earliest wait late april yeutter zealand day informal meeting trade ministers reviewing uruguay round agreement trade tariffs gatt meet japanese delegation days declined methods relieving strain countries …	1	1	3	1	2	4	3	1	0	1	2	11	10	8	2	1	16	1	17
china tighten imports ordinary restrict import domestically premier told national congress parliament foreign exchange limited expand production import substitutes increase proportion exports china increase proportion manufactured textiles light industrial electronics machinery china lower cost exports control export incur loss china trade deficit billion dlrs record billion china provide favoura…	11	china tighten imports ordinary restrict import domestically premier told national congress parliament foreign exchange limited expand production import substitutes increase proportion exports china increase proportion manufactured textiles light industrial electronics machinery china lower cost exports control export incur loss china trade deficit billion dlrs record billion china provide favoura…	1	1	1	2	0	2	4	3	6	0	5	5	4	9	7	11	14	11	11
philippines trade industry secretary jose concepcion told trade ministers agreement real european community ec proposed levy vegetable oils concepcion speaking informal meeting agreement tariffs trade gatt ministers declared uruguay september trade developed nations disrupted ec request lower tariffs coconut oil proposed levy vegetable oils fats vital exports southeast asian countries concepcion …	11	philippines trade industry secretary jose concepcion told trade ministers agreement real european community ec proposed levy vegetable oils concepcion speaking informal meeting agreement tariffs trade gatt ministers declared uruguay september trade developed nations disrupted ec request lower tariffs coconut oil proposed levy vegetable oils fats vital exports southeast asian countries concepcion …	1	1	3	1	2	4	3	8	3	6	3	1	11	4	14	9	11	6	14
ministry international trade industry japanese computer microchip makers slash output quarter effort save semiconductor pact united miti officials united accused japan reneging semiconductor pact failing flow cut price japanese chips asian markets washington threatened retaliatory action april pact agreed calls japan selling cut price chips markets increase imports american chips reduce huge trad…	11	ministry international trade industry japanese computer microchip makers slash output quarter effort save semiconductor pact united miti officials united accused japan reneging semiconductor pact failing flow cut price japanese chips asian markets washington threatened retaliatory action april pact agreed calls japan selling cut price chips markets increase imports american chips reduce huge trad…	1	1	3	1	2	4	3	1	0	1	10	10	8	13	13	5	8	17	4
agriculture ministry officials cuts import duties chocolate ease friction united agricultural trade japan lowered duties sharply domestic market conditions official duties chocolate cut pct pct april washington demanding cut pct equivalent duties ministry sources japanese chocolate imports rose tonnes calendar official statistics ministry sources government cuts response strong european demand co…	11	agriculture ministry officials cuts import duties chocolate ease friction united agricultural trade japan lowered duties sharply domestic market conditions official duties chocolate cut pct pct april washington demanding cut pct equivalent duties ministry sources japanese chocolate imports rose tonnes calendar official statistics ministry sources government cuts response strong european demand co…	1	1	3	1	2	4	3	1	0	1	10	10	8	13	13	5	8	17	4
dollar decline result complete reduction current account deficit anthony solomon chairman warburg usa president federal reserve bank york presentation japan society solomon expects decline dollar dollar fall current account deficit reduced reaches structural core solomon structural core half current billion dlr annual deficit cited factors prevent elimination deficit investment manufacturing indu…	11	dollar decline result complete reduction current account deficit anthony solomon chairman warburg usa president federal reserve bank york presentation japan society solomon expects decline dollar dollar fall current account deficit reduced reaches structural core solomon structural core half current billion dlr annual deficit cited factors prevent elimination deficit investment manufacturing indu…	1	1	1	2	0	2	4	3	6	0	5	8	9	11	11	14	13	13	8
united japan brink conflict trade semiconductors japanese unwillingness public bodies buy super computers barriers firms seeking participate billion dlr kansai airport project trade representative clayton yeutter talking reporters yesterday eve day meeting trade ministers review progress committees set uruguay meeting september launched round gatt agreement tariffs trade talks european community …	11	united japan brink conflict trade semiconductors japanese unwillingness public bodies buy super computers barriers firms seeking participate billion dlr kansai airport project trade representative clayton yeutter talking reporters yesterday eve day meeting trade ministers review progress committees set uruguay meeting september launched round gatt agreement tariffs trade talks european community …	1	1	3	1	2	4	3	1	0	1	2	11	10	8	2	1	16	1	17
agriculture undersecretary daniel amstutz reach global agreement scale agricultural supports calendar speaking senate agriculture appropriations committee hearing amstutz reach agreement calendar amstutz priority uruguay round global trade talks comments statement secretary george shultz week urging agriculture priority item upcoming summit western heads venice italy	11	agriculture undersecretary daniel amstutz reach global agreement scale agricultural supports calendar speaking senate agriculture appropriations committee hearing amstutz reach agreement calendar amstutz priority uruguay round global trade talks comments statement secretary george shultz week urging agriculture priority item upcoming summit western heads venice italy	1	1	3	4	5	4	7	7	5	8	2	11	10	3	3	1	4	10	17
trade deficit widened billion baht quarter billion ago business economics department march imports rose billion baht billion improved business climate pct increase imports raw materials semi finished products oil import bill fell pct quarter lower oil prices department quarter exports expanded billion baht billion export growth expected lower earnings key commodities including rice earnings decli…	11	trade deficit widened billion baht quarter billion ago business economics department march imports rose billion baht billion improved business climate pct increase imports raw materials semi finished products oil import bill fell pct quarter lower oil prices department quarter exports expanded billion baht billion export growth expected lower earnings key commodities including rice earnings decli…	0	1	1	2	0	2	4	3	6	0	5	8	9	11	11	6	13	13	8
trade surplus march totalled mln dlrs billion dlrs month official banco brasil announced news conference director foreign trade department cacex fendt attributed weak performance labour strikes march exports totalled billion dlrs billion dlrs february billion dlrs march march imports amounted billion dlrs compared billion dlrs february billion dlrs march fendt coffee earnings mln dlrs march mln d…	11	trade surplus march totalled mln dlrs billion dlrs month official banco brasil announced news conference director foreign trade department cacex fendt attributed weak performance labour strikes march exports totalled billion dlrs billion dlrs february billion dlrs march march imports amounted billion dlrs compared billion dlrs february billion dlrs march fendt coffee earnings mln dlrs march mln d…	0	1	1	2	0	2	4	3	6	0	5	5	4	9	7	3	14	16	0
south korea cut import taxes items including construction equipment film cigarettes pipe tobacco reduce trade surplus united finance ministry tariff cuts percentage july brings import taxes cut ministry official items washington seoul lower tariffs announcement removal import curbs products products sought free access south korean market policy limit trade surplus united reduce trade friction cou…	11	south korea cut import taxes items including construction equipment film cigarettes pipe tobacco reduce trade surplus united finance ministry tariff cuts percentage july brings import taxes cut ministry official items washington seoul lower tariffs announcement removal import curbs products products sought free access south korean market policy limit trade surplus united reduce trade friction cou…	1	1	1	2	0	2	4	3	6	0	5	5	4	9	7	3	14	16	18
exports american wine rose cent total gallons wine institute san francisco based promotional cent exported wine california top markets canada japan britain japan edged britain leading importer american wines continued canadian imports rose cent gallons japan cent gallons britain cent gallons spokesman institute declining dollar strong promotional efforts california wine industry contributed incre…	11	exports american wine rose cent total gallons wine institute san francisco based promotional cent exported wine california top markets canada japan britain japan edged britain leading importer american wines continued canadian imports rose cent gallons japan cent gallons britain cent gallons spokesman institute declining dollar strong promotional efforts california wine industry contributed incre…	1	1	3	1	2	4	3	1	0	1	10	10	8	13	13	5	8	17	16
reagan administration encourage expanded trade soviet union moscow warrants favored nation treatment deputy secretary john trade trade told forum soviet trade relations administration january allowed foreign policy controls export oil gas equipment soviet union lapse washington allies reviewing remaining export controls hopes list prohibited items speeding licensing process treatment favored nati…	11	reagan administration encourage expanded trade soviet union moscow warrants favored nation treatment deputy secretary john trade trade told forum soviet trade relations administration january allowed foreign policy controls export oil gas equipment soviet union lapse washington allies reviewing remaining export controls hopes list prohibited items speeding licensing process treatment favored nati…	1	1	3	1	2	4	3	1	0	1	2	11	10	3	3	1	4	10	2
visible trade deficit narrowed seasonally adjusted provisional mln stg february mln january trade industry department current account balance payments february seasonally adjusted provisional surplus mln stg compared surplus mln january invisibles february provisionally mln surplus january seasonally adjusted imports rose february billion stg billion january exports rose record billion month bill…	11	visible trade deficit narrowed seasonally adjusted provisional mln stg february mln january trade industry department current account balance payments february seasonally adjusted provisional surplus mln stg compared surplus mln january invisibles february provisionally mln surplus january seasonally adjusted imports rose february billion stg billion january exports rose record billion month bill…	0	1	1	2	0	2	4	3	6	0	5	5	4	9	7	3	14	16	0
white house economic policy council recommendation president reagan retaliate japan alleged unfair practices semiconductor trade officials disclose recommendation officials earlier council call retaliation urge curbs imposed japanese exports united officials days reagan moves public senate week unanimously called reagan impose japanese exports retaliation called semiconductor industry chief trade…	11	white house economic policy council recommendation president reagan retaliate japan alleged unfair practices semiconductor trade officials disclose recommendation officials earlier council call retaliation urge curbs imposed japanese exports united officials days reagan moves public senate week unanimously called reagan impose japanese exports retaliation called semiconductor industry chief trade…	1	1	3	1	2	4	3	1	0	1	10	10	8	13	13	5	8	17	4
[truncated: 885 more rows]
