# Supplementary material for: An adaptive method for determining the optimal number of topics in topic modeling
Source: PeerJ journal article supplement (doi:10.7717/peerj-cs.2723), 2025-02-28
Supplement: Code.zip [file snippets1.xlsx]

## Sheet: Sheet1
new	type	new_nltk
turtlesoft goldenseal software reference banktran bank transactions goldenseal accounting software business	business	turtlesoft goldenseal software reference banktran bank transactions goldenseal accounting software business
forbes markets stock market news stock quotes world markets forbes com stock market news market news headlines forbes com	business	forbes markets stock market news stock quotes markets forbes stock market news market news headlines forbes
webtech kennesaw edu jcheek stock market stock market american stock exchange comprehensive resource investors issuers unique market environment american stock	business	webtech kennesaw jcheek stock market stock market american stock exchange comprehensive resource investors issuers unique market environment american stock
stock market crash stock market crash information stock market crash lead depression chart glossary links	business	stock market crash stock market crash stock market crash lead depression chart glossary links
wikipedia wiki economic economy wikipedia encyclopedia economy system human activities production distribution exchange consumption services	business	wikipedia wiki economic economy wikipedia encyclopedia economy system human activities production distribution exchange consumption services
wikipedia wiki economies scale economies scale wikipedia encyclopedia economies scale characterizes production process scale firm causes cost	business	wikipedia wiki economies scale economies scale wikipedia encyclopedia economies scale characterizes production process scale firm cost
bloomberg news economy economies bloomberg com economies lei distinct signal economy moderating anthony chan chief economist jpmorgan client services	business	bloomberg news economy economies bloomberg economies lei distinct signal economy moderating anthony chan chief economist jpmorgan client services
library thinkquest stockmarket introduction stock market learn stock market money economy healthy tutorial	business	library thinkquest stockmarket introduction stock market learn stock market money economy healthy tutorial
siteresources worldbank cso resources wvaids economies false economies aids-affected countries action copyright world vision international rights reserved	business	siteresources worldbank cso resources wvaids economies false economies aids countries action copyright vision international rights reserved
answers topic economy economy information answers com economy meanings economy disambiguation economy human activities production distribution exchange	business	answers topic economy economy answers economy meanings economy disambiguation economy human activities production distribution exchange
communityeconomies community economies community economies project home page stories strategies knowledges connections links resources reading lists	business	communityeconomies community economies community economies project stories strategies knowledges connections links resources reading lists
latineconomies latin economies daily news events global news service information affairs news	business	latineconomies latin economies daily news events global news service affairs news
usinfo state gov products pubs market mktec market economy command market economies usinfo gov united department	business	usinfo gov products pubs market mktec market economy command market economies usinfo gov united department
wps product cws home ethnic economies elsevier ethnic economy middleman minorities booker washington ethnic economy ethnic enclave economy interactionism	business	wps product cws ethnic economies elsevier ethnic economy middleman minorities booker washington ethnic economy ethnic enclave economy interactionism
afdb portal dad portal schema portal oil prices african economies african economies globe feeling pressure escalating oil prices putting economies	business	afdb portal dad portal schema portal oil prices african economies african economies globe feeling pressure escalating oil prices putting economies
economywatch world economy world economy world economies economy world world economy integrated information world economy economy	business	economywatch economy economy economies economy economy integrated economy economy
nasdaq reference glossary stm nasdaq stock market glossary firms act nasdaq market makers nasdaq stock market markets	business	nasdaq reference glossary stm nasdaq stock market glossary firms nasdaq market makers nasdaq stock market markets
hsx welcome hollywood stock exchange entertainment hollywood stock exchange entertainment prediction market buy sell hold favorite movies stars virtual stock market	business	hsx hollywood stock exchange entertainment hollywood stock exchange entertainment prediction market buy sell hold favorite movies stars virtual stock market
quote quote com source financial markets quotes charts news keycorp buy holding mln cash stock shares sur market data delayed exchange rules quotes eastern	business	quote quote source financial markets quotes charts news keycorp buy holding mln cash stock shares sur market data delayed exchange rules quotes eastern
erealdeal erealdeal marketplace- trade export import directory auction international business trade import export portal consumers companies manufacturers suppliers products export import	business	erealdeal erealdeal marketplace trade export import directory auction international business trade import export portal consumers companies manufacturers suppliers products export import
whitehouse gov omb expectmore summary expectmore gov international trade administration import international trade commission program administers antidumping anti-subsidy laws relief american	business	whitehouse gov omb expectmore summary expectmore gov international trade administration import international trade commission program administers antidumping anti subsidy laws relief american
nasdaq nasdaq stock market market security information nasdaq counter stock exchange portfolio tracking ipo information	business	nasdaq nasdaq stock market market security nasdaq counter stock exchange portfolio tracking ipo
finance yahoo yahoo finance stock quotes market news mortgage rates yahoo finance stock quotes news portfolio management resources international market data message boards mortgage rates	business	finance yahoo yahoo finance stock quotes market news mortgage rates yahoo finance stock quotes news portfolio management resources international market data message boards mortgage rates
nyse nyse york stock exchange news data information website nyse	business	nyse nyse york stock exchange news data website nyse
wikipedia wiki stock market stock market wikipedia encyclopedia stock market market trading company stock derivatives securities listed stock exchange	business	wikipedia wiki stock market stock market wikipedia encyclopedia stock market market trading company stock derivatives securities listed stock exchange
smgww stock market game™ home stock market game™ smg students chance invest hypothetical on-line portfolio playing game	business	smgww stock market stock market smg students chance invest hypothetical portfolio playing game
stockmarketyellowpages hottest stocks stock market stock quotes streaming livecharts customizable interactive charts raging bull message boards financial news research portfolio tracking	business	stockmarketyellowpages hottest stocks stock market stock quotes streaming livecharts customizable interactive charts raging bull message boards financial news portfolio tracking
money howstuffworks stock howstuffworks stocks stock market stock market trading shares company stock stock market learn stock trading process	business	money howstuffworks stock howstuffworks stocks stock market stock market trading shares company stock stock market learn stock trading process
neopets stockmarket neopets login neopets com virtual pet community games shops auctions chat	business	neopets stockmarket neopets login neopets virtual pet community games shops auctions chat
mit edu stocks stockmaster mit mit stockmaster service presently unavailable author commercial version address	business	mit stocks stockmaster mit mit stockmaster service presently unavailable author commercial version address
money cnn data markets markets financial market coverage breaking news analysis stock quotes hours market data research earnings	business	money cnn data markets markets financial market coverage breaking news analysis stock quotes hours market data earnings
factmonster spot stockmarket stock market market public bought sold stock market business buying selling stock stock market	business	factmonster spot stockmarket stock market market public bought sold stock market business buying selling stock stock market
seattletimes nwsource news business stocks seattle business technology stock market seattle seattletimes com northwest news information seattle daily news sports arts entertainment classified ads	business	seattletimes nwsource news business stocks seattle business technology stock market seattle seattletimes northwest news seattle daily news sports arts entertainment classified ads
vse marketwatch virtual stock exchange home stock market game message boards trade stocks funds collaborative environment competition	business	vse marketwatch virtual stock exchange stock market game message boards trade stocks funds collaborative environment competition
ciesin columbia edu wbank tde home trends developing economies trends developing economies tide reports world bank borrowing countries compendium country economic	business	ciesin columbia wbank tde trends developing economies trends developing economies tide reports bank borrowing countries compendium country economic
infoplease cig economics getting organized command market mixed economies overview economics—getting organized command market practice command economies socialism communism command economies people	business	infoplease cig economics organized command market mixed economies overview organized command market practice command economies socialism communism command economies people
samvak tripod guide world conflict economies transition essays articles economics politics history cultures societies countries regions conflict transition central eastern europe	business	samvak tripod guide conflict economies transition essays articles economics politics history cultures societies countries regions conflict transition central eastern europe
amazon ethnic economies ivan light amazon com ethnic economies books ivan light gold amazon com ethnic economies books ivan light gold ivan light gold	business	amazon ethnic economies ivan light amazon ethnic economies books ivan light gold amazon ethnic economies books ivan light gold ivan light gold
epa gov epp environmentally preferable purchasing environmentally preferable purchasing product service purchasing information documents environment price performance epp	business	epa gov epp environmentally preferable purchasing environmentally preferable purchasing product service purchasing documents environment price performance epp
purchasing state purchasing vendor bid opportunities contracts listings purchasing contacts	business	purchasing purchasing vendor bid opportunities contracts listings purchasing contacts
purchasing tamu edu texas university purchasing services divisions purchasing stores central surplus property holding interior design customer information supplier mall	business	purchasing tamu texas university purchasing services divisions purchasing stores central surplus property holding interior design customer supplier mall
indiana edu purchase indiana university purchasing information purchasing indiana university institutional contracts purchasing policies	business	indiana purchase indiana university purchasing purchasing indiana university institutional contracts purchasing policies
energystar gov index bulk purchasing bus purchasing purchasing procurement energy star epa resources designed assist procurement officials smart purchase decisions online training	business	energystar gov bulk purchasing bus purchasing purchasing procurement energy star epa resources designed assist procurement officials smart purchase decisions online training
gov dcs central purchasing department central services central purchasing purchasing division department central services procurement functions oversight agencies procurement	business	gov dcs central purchasing department central services central purchasing purchasing division department central services procurement functions oversight agencies procurement
wikipedia wiki the global economy global economy wikipedia encyclopedia technology environment characterized global global economy business market products	business	wikipedia wiki global economy global economy wikipedia encyclopedia technology environment characterized global global economy business market products
wikipedia wiki globalization globalization wikipedia encyclopedia global economic system critics globalization price damage pollution environmental	business	wikipedia wiki globalization globalization wikipedia encyclopedia global economic system critics globalization price damage pollution environmental
globalexchange campaigns democratizing global economy background analysis information links progressive perspectives critical patterns policies globalization	business	globalexchange campaigns democratizing global economy background analysis links progressive perspectives critical patterns policies globalization
globalexchange campaigns econ introduction global economy global econ introduction global economy developed deeper understanding educate global economy section	business	globalexchange campaigns econ introduction global economy global econ introduction global economy developed deeper understanding educate global economy
worldbank globaloutlook prospects global economy soft-landing global economy outcome uncertainties depth slowdown united	business	worldbank globaloutlook prospects global economy soft landing global economy outcome uncertainties depth slowdown united
rgemonitor roubini global economics rge monitor global economic political debates team experienced analysts issues	business	rgemonitor roubini global economics rge monitor global economic political debates team experienced analysts issues
bepress gej global economy journal global economy journal gej journal international trade finance association innovative peer-reviewed	business	bepress gej global economy journal global economy journal gej journal international trade finance association innovative peer reviewed
weforum initiatives gcp global competitiveness report index world economic forum global competitiveness report growing complexity global economy report contribution enhancing understanding key factors economic	business	weforum initiatives gcp global competitiveness report economic forum global competitiveness report growing complexity global economy report contribution enhancing understanding key factors economic
news yahoo business global economy global economy coverage yahoo news coverage global economy cashing global warming marketplace protests germany violent npr	business	news yahoo business global economy global economy coverage yahoo news coverage global economy cashing global warming marketplace protests germany violent npr
grc purchasing grc purchase download entry realtime software purchase download system	business	grc purchasing grc purchase download entry realtime software purchase download system
tradeleadscenter directory export import international trade leads post trade leads directory export import international trade leads help business partners	business	tradeleadscenter directory export import international trade leads post trade leads directory export import international trade leads business partners
oracle applications peoplesoft srm ent module purchasing oracle enterprise purchasing procurement software streamline purchasing process peoplesoft enterprise purchasing procurement software procurement software automated workflow	business	oracle applications peoplesoft srm ent module purchasing oracle enterprise purchasing procurement software streamline purchasing process peoplesoft enterprise purchasing procurement software procurement software automated workflow
purchasing state alabama department finance purchasing division vendor bid opportunities contracts listings purchasing faq news	business	purchasing alabama department finance purchasing division vendor bid opportunities contracts listings purchasing faq news
amazon monetary reform former socialist economies amazon com monetary reform socialist economies books amazon com monetary reform socialist economies books george macesich dimitrije dimitrejevic george macesich dimitrije dimitrejevic	business	amazon monetary reform socialist economies amazon monetary reform socialist economies books amazon monetary reform socialist economies books george macesich dimitrije dimitrejevic george macesich dimitrije dimitrejevic
answers topic economies scale economy scale definition answers com economy scale economies scale unit cost product service large-scale operations mass	business	answers topic economies scale economy scale definition answers economy scale economies scale unit cost product service scale operations mass
americanscientist template bookreviewtypedetail assetid american scientist online ancient economies archaeological perspectives political economies edited gary feinman nicholas university utah press	business	americanscientist template bookreviewtypedetail assetid american scientist online ancient economies archaeological perspectives political economies edited gary feinman nicholas university utah press
doingbusiness home business world bank business indicators comparable economies indicate regulatory costs business analyze	business	doingbusiness business bank business indicators comparable economies regulatory costs business analyze
raphkoster agc mmo economies raph website agc mmo economies money economy faucets drains words player-to-game exchanges player hours help faucet	business	raphkoster agc mmo economies raph website agc mmo economies money economy faucets drains player game exchanges player hours faucet
purchasing purchasing com magazine chief procurement officers purchasing com online home purchasing magazine covers practices studies strategic sourcing chain management procurement	business	purchasing purchasing magazine chief procurement officers purchasing online purchasing magazine covers practices studies strategic sourcing chain management procurement
bls gov oco ocos purchasing managers buyers purchasing agents purchasing managers buyers purchasing agents key component firm chain buy services company	business	bls gov oco ocos purchasing managers buyers purchasing agents purchasing managers buyers purchasing agents key component firm chain buy services company
ism institute management home page sale items ism online discount sale save percent listed price purchase professional management reference books	business	ism institute management sale items ism online discount sale save percent listed price purchase professional management reference books
wikipedia wiki purchasing purchasing wikipedia encyclopedia purchasing function business whereby enterprise inputs services	business	wikipedia wiki purchasing purchasing wikipedia encyclopedia purchasing function business enterprise inputs services
wikipedia wiki purchasing power parity purchasing power parity wikipedia encyclopedia purchasing power parity ppp theory developed gustav cassel method long-run equilibrium exchange rate	business	wikipedia wiki purchasing power parity purchasing power parity wikipedia encyclopedia purchasing power parity ppp theory developed gustav cassel method equilibrium exchange rate
american purchasing american purchasing society purchasing assistance faq training education	business	american purchasing american purchasing society purchasing assistance faq training education
entrepreneur formnet purchasingforms business purchasing business purchasing formalize purchasing process--and wasting money--with smart	business	entrepreneur formnet purchasingforms business purchasing business purchasing formalize purchasing process wasting money smart
michigan gov doingbusiness business information chooses vendors purchases online purchasing system	business	michigan gov doingbusiness business chooses vendors purchases online purchasing system
kodak eknec pagequerier path purchasing welcome purchasing website information global strategies policies procedures contacts	business	kodak eknec pagequerier path purchasing purchasing website global strategies policies procedures contacts
purchasinga purchasing inventory chain ecommerce information purchasing management links resources purchasing management professionals research	business	purchasinga purchasing inventory chain ecommerce purchasing management links resources purchasing management professionals
oracle applications procurement purchasing oracle purchasing oracle purchasing application professional buyers streamlines purchase processing strengthening policy compliance	business	oracle applications procurement purchasing oracle purchasing oracle purchasing application professional buyers streamlines purchase processing strengthening policy compliance
dir yahoo social science economics global economy global economy yahoo directory sites globalization global economy address development issues global financial crisis global economy	business	dir yahoo social science economics global economy global economy yahoo directory sites globalization global economy address development issues global financial crisis global economy
wikipedia wiki import import international trade wikipedia encyclopedia economics import commodity country country legitimate fashion trade	business	wikipedia wiki import import international trade wikipedia encyclopedia economics import commodity country country legitimate fashion trade
geographia bahamas investment trade bahamas investment authority import export export import trade bahamas government bahamas encourage commission agencies engaged import export trade	business	geographia bahamas investment trade bahamas investment authority import export export import trade bahamas government bahamas encourage commission agencies engaged import export trade
bea gov bea home gdp gross domestic product	business	bea gov bea gdp gross domestic product
bea gov newsreleases national gdp gdpnewsrelease bea news release gross domestic product source economic statistics national income product accounts nipas gross domestic product gdp measures national	business	bea gov newsreleases national gdp gdpnewsrelease bea news release gross domestic product source economic statistics national income product accounts nipas gross domestic product gdp measures national
nationmaster graph eco gdp economy gdp nominal nationmaster statistics gdp nominal japan economy gross domestic product gdp ppp measure poverty rates	business	nationmaster graph eco gdp economy gdp nominal nationmaster statistics gdp nominal japan economy gross domestic product gdp ppp measure poverty rates
investorwords gdp gdp definition gdp definition gdp gross domestic product market value services country	business	investorwords gdp gdp definition gdp definition gdp gross domestic product market services country
biz yahoo terms gdp yahoo briefing economic calendar gross domestic product gdp broadest measure economic activity annualized quarterly percent gdp reflect growth rate	business	biz yahoo terms gdp yahoo briefing economic calendar gross domestic product gdp broadest measure economic activity annualized quarterly percent gdp reflect growth rate
hmit gdp gdp net gross domestic product gdp market value services country period	business	hmit gdp gdp net gross domestic product gdp market services country period
wikipedia wiki list countries gdp nominal countries gdp nominal wikipedia encyclopedia article countries world sorted gross domestic product gdp value services	business	wikipedia wiki list countries gdp nominal countries gdp nominal wikipedia encyclopedia article countries sorted gross domestic product gdp services
answers topic gross domestic product gross domestic product definition answers com gross domestic product abbr gdp market value services borders nation	business	answers topic gross domestic product gross domestic product definition answers gross domestic product abbr gdp market services borders nation
dieoff wrong gdp gdp gpi isew genuine progress indicator science ecology economics environment politics	business	dieoff wrong gdp gdp gpi isew genuine progress indicator science ecology economics environment politics
gdp gordon document products premier document management sales service lanier muratec paperclip duplo copiers fax electronic imaging computer networks duplicators office atlanta	business	gdp gordon document products premier document management sales service lanier muratec paperclip duplo copiers fax electronic imaging computer networks duplicators office atlanta
investopedia ask answers gdp gross domestic product gdp indicator gauge health country economy dollar value	business	investopedia answers gdp gross domestic product gdp indicator gauge health country economy dollar
epi content webfeatures econindicators gdppict gdp picture bureau economic analysis bea reported gross domestic product gdp grew quarter growth	business	epi content webfeatures econindicators gdppict gdp picture bureau economic analysis bea reported gross domestic product gdp grew quarter growth
theatlantic politics ecbig gdp gdp america atlantic unbound atlantic monthly magazine online	business	theatlantic politics ecbig gdp gdp america atlantic unbound atlantic monthly magazine online
siteresources worldbank datastatistics resources gdp gdp gdp millions ranking economy dollars united rankings economies confirmed gdp estimates	business	siteresources worldbank datastatistics resources gdp gdp gdp millions ranking economy dollars united rankings economies confirmed gdp estimates
chinadaily bizchina content gross domestic product gdp monetary value services country borders period gdp calculated	business	chinadaily bizchina content gross domestic product gdp monetary services country borders period gdp calculated
wikipedia wiki gross domestic product gross domestic product wikipedia encyclopedia region gross domestic product gdp measuring economy gdp country market value	business	wikipedia wiki gross domestic product gross domestic product wikipedia encyclopedia region gross domestic product gdp measuring economy gdp country market
tiaonline business research mrf chapters market sector data purchase chapters ii- tia telecommunications market review forecast sector -specific	business	tiaonline business mrf chapters market sector data purchase chapters ii tia telecommunications market review forecast sector specific
statistics gov statbase product vlnk national statistics online product market sector gross value market sector gva experimental published zip article market sector gross value web link	business	statistics gov statbase product vlnk national statistics online product market sector gross market sector gva experimental published zip article market sector gross web link
thinkglink market sector market sector market sector categorizing companies industry operate sectors technology	business	thinkglink market sector market sector market sector categorizing companies industry operate sectors technology
moneycentral msn investor market usindex investing sector key indexes msn money leading market indexes sector indexes statistics sector indexes values leading stock sector indexes	business	moneycentral msn investor market usindex investing sector key indexes msn money leading market indexes sector indexes statistics sector indexes values leading stock sector indexes
progs wealth market market sector summary programmes wealth international market sector summary	business	progs wealth market market sector summary programmes wealth international market sector summary
gov prod consum idcplg idcservice get siteid sstargetnodeid ssdocname sector market mapping department health publications report commissioned iff research ltd department health	business	gov prod consum idcplg idcservice siteid sstargetnodeid ssdocname sector market mapping department health publications report commissioned iff department health
money cnn data sectors techstocks index tech stock sectors market prices data cnnmoney technology industry center financial data performance information tech stock sector	business	money cnn data sectors techstocks tech stock sectors market prices data cnnmoney technology industry center financial data performance tech stock sector
ashkon ptt monitor stock market sectors stock market sector monitor watch stock market industry performance	business	ashkon ptt monitor stock market sectors stock market sector monitor watch stock market industry performance
independentsector mission market index independent sector mission market mission market resource center effective corporate-nonprofit partnerships resources nonprofit corporate executives	business	independentsector mission market independent sector mission market mission market resource center effective corporate nonprofit partnerships resources nonprofit corporate executives
infoexport industrysector market research report listings agricultural technology spacer market reports services abroad sector industry sector market reports staff	business	infoexport industrysector market report listings agricultural technology spacer market reports services abroad sector industry sector market reports staff
recomresearch sector overview communication market research recom research recom research market sector furnish activity dynamic markets clients	business	recomresearch sector overview communication market recom recom market sector furnish activity dynamic markets clients
vega group marketsectors vega market sectors core markets aerospace defence government key clients commercial market sectors	business	vega marketsectors vega market sectors core markets aerospace defence government key clients commercial market sectors
smacna councils smacna market sector councils smacna market sector councils architectural hvac industrial residential councils established structured	business	smacna councils smacna market sector councils smacna market sector councils architectural hvac industrial residential councils established structured
eweek article non-retiring retirees fastest-growing job market sector research americans record	business	eweek article retiring retirees fastest growing job market sector americans record
eia doe gov cneaf solar renewables solarreport table table shipments solar thermal collectors market sector data table market sector shipments solar thermal collectors	business	eia doe gov cneaf solar renewables solarreport table table shipments solar thermal collectors market sector data table market sector shipments solar thermal collectors
online wsj mdc public mfsctrscan money flows market sector overview markets data center wsj com	business	online wsj mdc public mfsctrscan money flows market sector overview markets data center wsj
https uktradeinvest gov ukti market sector research market sector research market sector research business market unique assistance research advice customers	business	https uktradeinvest gov ukti market sector market sector market sector business market unique assistance advice customers
businessweek the thread economicsunbound archives phantom gdp phantom gdp story promised summarize statistics miscounting impact offshoring crazy	business	businessweek thread economicsunbound archives phantom gdp phantom gdp story promised summarize statistics miscounting impact offshoring crazy
gentoo proj gdp gentoo linux projects gentoo documentation project gentoo documentation project gdp responsible creation maintenance gentoo documentation gdp team	business	gentoo proj gdp gentoo linux projects gentoo documentation project gentoo documentation project gdp responsible creation maintenance gentoo documentation gdp team
enn globe pollution china stopped public enn beijing news reported release gdp report computing cost pollution ecological degradation	business	enn globe pollution china stopped public enn beijing news reported release gdp report computing cost pollution ecological degradation
marketwatch news story economists get joy story guid eadb fbc dist mostreadhome economists joy gdp jump marketwatch complicating factor gdp report revisions economic growth	business	marketwatch news story economists joy story guid eadb fbc dist mostreadhome economists joy gdp jump marketwatch complicating factor gdp report revisions economic growth
finance yahoo ticker symbol yahoo finance information quote performance real-time ecn technical chart analysis key stats insider transactions company	business	finance yahoo ticker symbol yahoo finance quote performance real time ecn technical chart analysis key stats insider transactions company
fita import export business international trade leads fita global import export business international trade leads fita global trade leads	business	fita import export business international trade leads fita global import export business international trade leads fita global trade leads
fita webindex international trade links resources import -export fita org international trade leads world trade export import fita org global trade portal	business	fita webindex international trade links resources import export fita org international trade leads trade export import fita org global trade portal
trade gov index trade gov import administration international trade administration enforcement actions ita import administration agency lead unit enforcing	business	trade gov trade gov import administration international trade administration enforcement actions ita import administration agency lead unit enforcing
tradezone busops import export business opportunities suppliers business opportunity mellinger import export business opportunities guidance running import export business opportunity	business	tradezone busops import export business opportunities suppliers business opportunity mellinger import export business opportunities guidance running import export business opportunity
tradezone import export trade leads global trade business opportunity mellinger import export business opportunity global trade leads services suppliers manufactures directory importers exporters	business	tradezone import export trade leads global trade business opportunity mellinger import export business opportunity global trade leads services suppliers manufactures directory importers exporters
dmoz business international business and trade import and export directory business international business trade business international business trade import export usenet alt business import -export news google	business	dmoz business international business trade import export directory business international business trade business international business trade import export usenet alt business import export news google
eximbooks world importers buyers traders agents dealers exporters export- import trade directories pages database guide books information buyers guides	business	eximbooks importers buyers traders agents dealers exporters export import trade directories database guide books buyers guides
trade indiamart trade leads international trade leads import export trade leads trade leads international trade lead import export trade leads business trade global buy sell international trade zone sell	business	trade indiamart trade leads international trade leads import export trade leads trade leads international trade lead import export trade leads business trade global buy sell international trade zone sell
myownbusiness international trade import export business session international trade import export business	business	myownbusiness international trade import export business session international trade import export business
onetrade biz trade international import export trade leads world marketplace gateway trade commerce industry business opportunities international import export trade leads valuable business	business	onetrade biz trade international import export trade leads marketplace gateway trade commerce industry business opportunities international import export trade leads valuable business
swissinfo import export bulletin board international trade leads import -export buy sell business opportunities	business	swissinfo import export bulletin board international trade leads import export buy sell business opportunities
traderscity board importers exporters import export trade leads traderscity importers exporters import export trade leads board importers exporters international trading import export leads viewable	business	traderscity board importers exporters import export trade leads traderscity importers exporters import export trade leads board importers exporters international trading import export leads viewable
eceurope eceurope international trade leads import export marketplace eceurope network international government import export trade leads marketplace directory world	business	eceurope eceurope international trade leads import export marketplace eceurope network international government import export trade leads marketplace directory
foreign trade import export resources foreign trade online premier web portal foreign trade importers exporters manufacturers freight forwarders directories trade leads statistics	business	foreign trade import export resources foreign trade online premier web portal foreign trade importers exporters manufacturers freight forwarders directories trade leads statistics
nasdaq comlookup stock quotes nasdaq stock prices stock symbols stock quotes nasdaq stock quotes stock quote feed features nasdaq nyse amex otcbb listed companies	business	nasdaq comlookup stock quotes nasdaq stock prices stock symbols stock quotes nasdaq stock quotes stock quote feed features nasdaq nyse amex otcbb listed companies
import export guide import export trade leads trade leads international import export traders	business	import export guide import export trade leads trade leads international import export traders
bloomberg bloomberg com marc faber stock market overdue play aig chubb allstate share buybacks portend premiums stock prices	business	bloomberg bloomberg marc faber stock market overdue play aig chubb allstate share buybacks portend premiums stock prices
money excite excite excite money investing stock quotes finance research stay investments instant stock market data forecasts news quotes research help informed decisions stock	business	money excite excite excite money investing stock quotes finance stay investments instant stock market data forecasts news quotes informed decisions stock
finance yahoo yahoo finance stock quotes market news mortgage rates yahoo finance stock quotes news portfolio management resources international market data message boards mortgage rates	business	finance yahoo yahoo finance stock quotes market news mortgage rates yahoo finance stock quotes news portfolio management resources international market data message boards mortgage rates
quote quote com source financial markets quotes charts news quote com financial portal streaming quotes charts keycorp buy holding mln cash stock shares sur	business	quote quote source financial markets quotes charts news quote financial portal streaming quotes charts keycorp buy holding mln cash stock shares sur
quote default quote com homepage quote com stock quotes streaming livecharts customizable interactive charts raging bull message boards financial news research	business	quote default quote homepage quote stock quotes streaming livecharts customizable interactive charts raging bull message boards financial news
markets newsday custom tribune interactive localmktscreener localmktscreener full siteid newsday stock quotes	business	markets newsday custom tribune interactive localmktscreener localmktscreener siteid newsday stock quotes
nasdaq nasdaq stock market nasdaq stock quotes prices check pre market hours stock trading	business	nasdaq nasdaq stock market nasdaq stock quotes prices check pre market hours stock trading
pcquote quote online access comprehensive technical analysis stock quote page comprehensive financials reports	business	pcquote quote online access comprehensive technical analysis stock quote comprehensive financials reports
moneycentral msn detail stock quote stock quotes msn money stock quote stock market quotes stock price fundamental investing data price charts news	business	moneycentral msn detail stock quote stock quotes msn money stock quote stock market quotes stock price fundamental investing data price charts news
bigcharts bigcharts interactive online charting service unlimited access charts reports indicators quotes stocks mutual funds	business	bigcharts bigcharts interactive online charting service unlimited access charts reports indicators quotes stocks mutual funds
jsonline bym your online business investments stock quotes symbol lookup wisconsin stocks stocks wisconsin companies operations	business	jsonline bym online business investments stock quotes symbol lookup wisconsin stocks stocks wisconsin companies operations
customwire dynamic files static moneywire basic tables full flmyr section asia news-press business stock quotes desktop weather email news npmobile com text messaging quotes delayed minutes	business	customwire dynamic files static moneywire basic tables flmyr asia news press business stock quotes desktop weather email news npmobile text messaging quotes delayed minutes
forbes markets stock market news stock quotes world markets forbes com stock market news market news headlines forbes com	business	forbes markets stock market news stock quotes markets forbes stock market news market news headlines forbes
dbc dbc com home real-time stock market quotes financial information news customized portfolio tracking information investors traders	business	dbc dbc real time stock market quotes financial news customized portfolio tracking investors traders
moneycentral msn investor home investing stock quotes charts market news msn money investing home page features investment tools stock quotes charts portfolio manager plus market news financial commentary	business	moneycentral msn investor investing stock quotes charts market news msn money investing features investment tools stock quotes charts portfolio manager market news financial commentary
nyse nyse york stock exchange news data information website nyse	business	nyse nyse york stock exchange news data website nyse
money cnn business financial personal finance news cnnmoney practical personal finance advice calculators investing tips business news stock quotes financial market coverage editors	business	money cnn business financial personal finance news cnnmoney practical personal finance advice calculators investing tips business news stock quotes financial market coverage editors
bigcharts marketwatch historical historical quotes charting tools security bigcharts world leading investment charting research historical stock quotes charting tool	business	bigcharts marketwatch historical historical quotes charting tools security bigcharts leading investment charting historical stock quotes charting tool
bullsector bull sector stock market sector industry lists keyword searches financial news articles stocks hot sectors	business	bullsector bull sector stock market sector industry lists keyword searches financial news articles stocks hot sectors
zmag crisescurevts globalism globalecon znet global economics crisis analysis commentaries interviews information resources world trade critical corporate globalization	business	zmag crisescurevts globalism globalecon znet global economics crisis analysis commentaries interviews resources trade critical corporate globalization
morganstanley views gef index morgan stanley global economic forum argued robust global economy capable de-coupling slowing economy divergence growth	business	morganstanley views gef morgan stanley global economic forum argued robust global economy capable de coupling slowing economy divergence growth
marketingpower welcome american marketing association www marketingpower com dedicated serving educational professional marketing executives	business	marketingpower american marketing association marketingpower dedicated serving educational professional marketing executives
careers marketing careers marketing careerselector com information key careers business investment banking consulting marketing	business	careers marketing careers marketing careerselector key careers business investment banking consulting marketing
marketingjobs sales jobs marketing jobs advertising jobs marketingjobs com employment marketing sales professionals	business	marketingjobs sales jobs marketing jobs advertising jobs marketingjobs employment marketing sales professionals
redflymarketing search engine marketing redfly online marketing organic search engine optimisation pay-per-click marketing campaign management dublin ireland	business	redflymarketing search engine marketing redfly online marketing organic search engine optimisation pay click marketing campaign management dublin ireland
marketingsherpa marketingsherpa home resource publishes news studies practices data internet integrated marketing	business	marketingsherpa marketingsherpa resource publishes news studies practices data internet integrated marketing
inc resources marketing business marketing plans marketing ideas business marketing plans marketing ideas internet marketing business inc com marketing resource center	business	resources marketing business marketing plans marketing ideas business marketing plans marketing ideas internet marketing business marketing resource center
knowthis knowthis marketing market research internet marketing virtual library information resources reference professionals academics students traditional internet marketing	business	knowthis knowthis marketing market internet marketing virtual library resources reference professionals academics students traditional internet marketing
wikipedia wiki category marketing category marketing wikipedia encyclopedia jump navigation search article category marketing retrieved http wikipedia org wiki category marketing	business	wikipedia wiki category marketing category marketing wikipedia encyclopedia jump navigation search article category marketing retrieved http wikipedia org wiki category marketing
marketingmag marketing canada canadian source news articles marketing advertising media	business	marketingmag marketing canada canadian source news articles marketing advertising media
clickz clickz internet marketing solutions marketers columns commentary analysis internet marketing subjects ranging marketing search engine marketing	business	clickz clickz internet marketing solutions marketers columns commentary analysis internet marketing subjects ranging marketing search engine marketing
lib lsu edu bus marketin lsu libraries business subject guides business marketing information sectoral product information project research program marketing computer mediated	business	lib lsu bus marketin lsu libraries business subject guides business marketing sectoral product project program marketing computer mediated
sales marketing careerbuilder default sales jobs marketing jobs advertising jobs careerbuilder com sales marketing jobs job search careerbuilder leader job search sites access jobs	business	sales marketing careerbuilder default sales jobs marketing jobs advertising jobs careerbuilder sales marketing jobs job search careerbuilder leader job search sites access jobs
hollywoodreporter film marketing index film marketing movie marketing movie promotions film marketing movie marketing movie promotions thehollywoodreporter com scoop film marketing movie marketing movie promotions	business	hollywoodreporter film marketing film marketing movie marketing movie promotions film marketing movie marketing movie promotions thehollywoodreporter scoop film marketing movie marketing movie promotions
abanet buslaw aba section business law mission business law section serve public profession section development improvement business law	business	abanet buslaw aba business law mission business law serve public profession development improvement business law
del icio popular marketing pages tagged marketing del icio items tagged marketing tag description view marketing blogs save posted prblogger	business	del icio popular marketing tagged marketing del icio items tagged marketing tag description view marketing blogs save posted prblogger
bidvertiser bidvertiser pay click advertising sites pay click advertising online advertising sites internet marketing solution online advertisers	business	bidvertiser bidvertiser pay click advertising sites pay click advertising online advertising sites internet marketing solution online advertisers
marketing business marketing association marketing training seminars business marketing association bma focuses field business-to-business marketing bma marketing services	business	marketing business marketing association marketing training seminars business marketing association bma focuses field business business marketing bma marketing services
entrepreneur marketing index business marketing business marketing business marketing business marketing	business	entrepreneur marketing business marketing business marketing business marketing business marketing
pwcmoneytree pricewaterhousecoopers global insights solutions moneytree moneytree report quarterly study venture capital investment activity united collaboration pricewaterhousecoopers	business	pwcmoneytree pricewaterhousecoopers global insights solutions moneytree moneytree report quarterly study venture capital investment activity united collaboration pricewaterhousecoopers
nvca national venture capital association global venture investment trends vcs foreign strategy national venture capital association affiliated	business	nvca national venture capital association global venture investment trends vcs foreign strategy national venture capital association affiliated
sba gov inv business administration temp programoffice style mission business investment company sbic program equity capital loan funds sound financing	business	sba gov inv business administration temp programoffice style mission business investment company sbic program equity capital loan funds sound financing
ohiomeansbusiness cost ohio business development coalition cost ohio business development coalition discover benefits business expansion relocation economic development ohio research key data resources	business	ohiomeansbusiness cost ohio business development coalition cost ohio business development coalition discover benefits business expansion relocation economic development ohio key data resources
ohiomeansbusiness docs tax research impact ohio tax reform capital investment ohio capital investment study role capital investment decision survey responders	business	ohiomeansbusiness docs tax impact ohio tax reform capital investment ohio capital investment study role capital investment decision survey responders
philvencap philippine venture capital investment home joomla dynamic portal engine content management system	business	philvencap philippine venture capital investment joomla dynamic portal engine content management system
cic capital investment consulting investment advice financial planning services	business	cic capital investment consulting investment advice financial planning services
wvncif natural capital investment fund donors invest natural capital investment fund commitment safeguarding privacy exceeding industry standards	business	wvncif natural capital investment fund donors invest natural capital investment fund commitment safeguarding privacy exceeding industry standards
gov iedc incentives venture indiana economic development corporation venture capital investment tax credit established application approved indiana venture capital investment tax credit	business	gov iedc incentives venture indiana economic development corporation venture capital investment tax credit established application approved indiana venture capital investment tax credit
feeds bizjournals bizj denver daily venture capital investment surges quarter denver venture capital investment surges quarter	business	feeds bizjournals bizj denver daily venture capital investment surges quarter denver venture capital investment surges quarter
vcic unc edu about vcic vcic venture capital investment competition venture capital investment competition technology bubble educational event mbas learn venture	business	vcic unc vcic vcic venture capital investment competition venture capital investment competition technology bubble educational event mbas learn venture
capgroup capital companies investment management companies capital international capital guardian capital research management	business	capgroup capital companies investment management companies capital international capital guardian capital management
wikipedia wiki marketing marketing wikipedia encyclopedia marketing theory practice justified belief customers product service product service	business	wikipedia wiki marketing marketing wikipedia encyclopedia marketing theory practice justified belief customers product service product service
managementhelp mrktng mrktng marketing learn marketing impression marketing advertising marketing promotion	business	managementhelp mrktng mrktng marketing learn marketing impression marketing advertising marketing promotion
marketing about marketing marketing strategy marketing plan marketing learn marketing careers stages developing marketing plan marketing research marketing strategy market	business	marketing marketing marketing strategy marketing plan marketing learn marketing careers stages developing marketing plan marketing marketing strategy market
abanet buslaw blt business law business law section news magazine business lawyers published month update busy professionals	business	abanet buslaw blt business law business law news magazine business lawyers published month update busy professionals
business gov business gov business link government business portal government guides resources help businesses comply business laws government regulations	business	business gov business gov business link government business portal government guides resources businesses comply business laws government regulations
business law freeadvice business law legal information business law information businesses written lawyers legal	business	business law freeadvice business law legal business law businesses written lawyers legal
wikipedia wiki list business law topics business law topics wikipedia encyclopedia retrieved http wikipedia org wiki business law topics categories business lists law lists business law	business	wikipedia wiki list business law topics business law topics wikipedia encyclopedia retrieved http wikipedia org wiki business law topics categories business lists law lists business law
house leg state fiscal files ibgf fund budget situation budget forecast fund released chart illustrates fund budget situation	business	house leg fiscal files ibgf fund budget situation budget forecast fund released chart illustrates fund budget situation
house leg state fiscal files fund budget forecast budget forecast fund released fund budget forecast document issued	business	house leg fiscal files fund budget forecast budget forecast fund released fund budget forecast document issued
pde state finances cwp finances fund budget fund budget abstract fund budget page links fund budget instructions information	business	pde finances cwp finances fund budget fund budget abstract fund budget links fund budget instructions
finance navy mil fmb pres nwcf nwcf department navy fiscal amended budget marine corps management table contents department navy navy capital fund amended budget submission	business	finance navy mil fmb pres nwcf nwcf department navy fiscal amended budget marine corps management table contents department navy navy capital fund amended budget submission
wmich edu wmu news wmu news trustees fund budget kalamazoo--during meeting western michigan university board trustees approved fund operating budget	business	wmich wmu news wmu news trustees fund budget kalamazoo meeting western michigan university board trustees approved fund operating budget
vanderbilt edu dsr forms restfundbudgetform vanderbilt fund budget vanderbilt fund budget interim budget valid project continuation renewal center	business	vanderbilt dsr forms restfundbudgetform vanderbilt fund budget vanderbilt fund budget interim budget valid project continuation renewal center
uillinois edu web home sollib moneysol permstatebudget permstatebudget permanent budget fund code financial fund code track permanent fund budget transactions fund code fiscal	business	uillinois web sollib moneysol permstatebudget permstatebudget permanent budget fund code financial fund code track permanent fund budget transactions fund code fiscal
budget wayne edu documents quarterlyforecast quarterly report board document third qtr final fund budget quarter report document quarter fund budget performance report update projection revenues	business	budget wayne documents quarterlyforecast quarterly report board document qtr final fund budget quarter report document quarter fund budget performance report update projection revenues
csus edu aba budget general fund info budget planning administration fund budget information csus budget faculty senate budget status town hall budget briefing	business	csus aba budget fund info budget planning administration fund budget csus budget faculty senate budget status town hall budget briefing
sitemaker umich edu obpinfo files overview budget model ppt overview fund budget model imputed calculated unit monthly fund balance budget allocation reflect university flow	business	sitemaker umich obpinfo files overview budget model ppt overview fund budget model imputed calculated unit monthly fund balance budget allocation reflect university flow
education gov kde administrative resources legal and legislative services general fund budget fund budget fund budget fund budget updated fund budget fund budget xls	business	education gov kde administrative resources legal legislative services fund budget fund budget fund budget fund budget updated fund budget fund budget xls
pde state pde finances fund budget pde- fund budget pde- abstract fund budget pde- information fund budget downloaded	business	pde pde finances fund budget pde fund budget pde abstract fund budget pde fund budget downloaded
opi state supt newsstories aea post-legislative fund budget data sheets traditionally school finance division releases updated version fund budget excel spreadsheets release updated	business	opi supt newsstories aea post legislative fund budget data sheets traditionally school finance division releases updated version fund budget excel spreadsheets release updated
mcpl lib publications budget operating fund budget mcpl mid-continent public library operating fund budget portable document format pdf operating fund	business	mcpl lib publications budget operating fund budget mcpl mid continent public library operating fund budget portable document format pdf operating fund
sers state sers cwp sers notice fund budget impasse notice fund budget impasse affect sers operations abstract news coverage impasse regarding	business	sers sers cwp sers notice fund budget impasse notice fund budget impasse affect sers operations abstract news coverage impasse
colorado edu pba budget policies gfdeficitpolicyrevised title fund budget deficit policy fund eliminating budget deficits fund fund expenditures generate fund fopps budget deficits budget deficit	business	colorado pba budget policies gfdeficitpolicyrevised title fund budget deficit policy fund eliminating budget deficits fund fund expenditures generate fund fopps budget deficits budget deficit
eastoncapital easton capital investment home page home page easton capital investment	business	eastoncapital easton capital investment easton capital investment
seattleschools area finance budget recommendedbudget seattle public schools fund budget recommended fund budget teaching activities	business	seattleschools finance budget recommendedbudget seattle public schools fund budget recommended fund budget teaching activities
louisianaschools lde finance fund budget louisiana department education louisiana district school boards budget revenues probable expenditures	business	louisianaschools lde finance fund budget louisiana department education louisiana district school boards budget revenues probable expenditures
wikipedia wiki commercial law commercial law wikipedia encyclopedia commercial law business law body law governs business commerce branch civil law	business	wikipedia wiki commercial law commercial law wikipedia encyclopedia commercial law business law body law governs business commerce branch civil law
lectlaw bus business law lounge legal information businesses ranging material business laws regulations structuring capital taxes securities employment contracts labor	business	lectlaw bus business law lounge legal businesses ranging material business laws regulations structuring capital taxes securities employment contracts labor
quickmba law business law company employment law business legal structure incorporate	business	quickmba law business law company employment law business legal structure incorporate
smallbusiness findlaw business lawyer attorney law legal help findlaw information legal sites business	business	smallbusiness findlaw business lawyer attorney law legal findlaw legal sites business
lawschools findlaw journals business findlaw students academic law journals law reviews abstract international business law journal forum europeen communication journal international business law hofstra university	business	lawschools findlaw journals business findlaw students academic law journals law reviews abstract international business law journal forum europeen communication journal international business law hofstra university
lawprofessors typepad business law business law prof blog commentary analysis business law issues professor dale oesterle moritz college law ohio university	business	lawprofessors typepad business law business law prof blog commentary analysis business law issues professor dale oesterle moritz college law ohio university
collegeboard student testing clep ibl clep introductory business law learn business law clep examination information test knowledge skills study resources clep	business	collegeboard student testing clep ibl clep introductory business law learn business law clep examination test knowledge skills study resources clep
ipww law business helping trademark owners fight counterfeiters internet growth business law firms consultants alike international savoir faire	business	ipww law business helping trademark owners fight counterfeiters internet growth business law firms consultants alike international savoir faire
kelley edu buslaw business law department business law department mission acquaint students factor affecting business operations	business	kelley buslaw business law department business law department mission acquaint students factor business operations
lectlaw tbul business laws structures issues topic legal tax finance operational materials businesses lectric law library	business	lectlaw tbul business laws structures issues topic legal tax finance operational materials businesses lectric law library
methvenlaw methvenlaw business law counselors home page home page methven associates business counselors	business	methvenlaw methvenlaw business law counselors methven associates business counselors
sjlbf stanford edu stanford journal law business finance student edited semiannual publication dedicated exploring legal issues fields business finance	business	sjlbf stanford stanford journal law business finance student edited semiannual publication dedicated exploring legal issues fields business finance
dir yahoo government law business business law yahoo directory yahoo reviewed sites law business	business	dir yahoo government law business business law yahoo directory yahoo reviewed sites law business
law lclark edu jsebl journal business law lewis clark law school jsebl journal business law nation academic law review focusing	business	law lclark jsebl journal business law lewis clark law school jsebl journal business law nation academic law review focusing
corp corporate law guide corporate business law business undertaken instances business governed law	business	corp corporate law guide corporate business law business undertaken instances business governed law
sitemaker umich edu obpinfo general fund budget study office budget planning fund budget study budget budget model fund budget study budget upload files enrollment projections source workbooks	business	sitemaker umich obpinfo fund budget study office budget planning fund budget study budget budget model fund budget study budget upload files enrollment projections source workbooks
newyorkfed research global economy index global economy federal reserve bank york economists research analyze global macroeconomics trade development international economic issues york fed core	business	newyorkfed global economy global economy federal reserve bank york economists analyze global macroeconomics trade development international economic issues york fed core
vcic unc edu vcic venture capital investment competition unc warns fake venture capital investment competition scheme links students vcs entrepreneurs alumni welcome	business	vcic unc vcic venture capital investment competition unc warns fake venture capital investment competition scheme links students vcs entrepreneurs alumni
businessfinance private investment capital investment capital business finance investment capital investment capital	business	businessfinance private investment capital investment capital business finance investment capital investment capital
google top arts music bands and artists trading google directory arts music bands artists trading bootleg trading netherlands trades audio video ntsc format video collection spans joshua tree	business	google top arts music bands artists trading google directory arts music bands artists trading bootleg trading netherlands trades audio video ntsc format video collection spans joshua tree
google top arts television trading google directory arts television trading american cartoons animation collection japanese trade format conversion pal ntsc	business	google top arts television trading google directory arts television trading american cartoons animation collection japanese trade format conversion pal ntsc
ultimate trading systems trading systems system designing trading plans trading trading plan discover step-by-step roadmap designing trading systems	business	ultimate trading systems trading systems system designing trading plans trading trading plan discover step step roadmap designing trading systems
intrade intrade prediction markets opportunity trade futures contracts sports	business	intrade intrade prediction markets opportunity trade futures contracts sports
alibaba trade servlet static safetrade index alibaba com import export trade leads leading source import-export trade leads suppliers business opportunities china world	business	alibaba trade servlet static safetrade alibaba import export trade leads leading source import export trade leads suppliers business opportunities china
yourtradingstock online stock trading stock trading online blog bladelogic ipo trading entry base intraday pattern	business	yourtradingstock online stock trading stock trading online blog bladelogic ipo trading entry base intraday pattern
sec gov answers daytrading trading trading risky substantial financial losses period trader	business	gov answers daytrading trading trading risky substantial financial losses period trader
netscape tag trading stories tagged trading netscape com money caterpillar profit trading forex operating loss business	business	netscape tag trading stories tagged trading netscape money caterpillar profit trading forex operating loss business
wikipedia wiki commerce electronic commerce wikipedia encyclopedia electronic commerce e-commerce ecommerce emergence e-commerce lowered barriers entry	business	wikipedia wiki commerce electronic commerce wikipedia encyclopedia electronic commerce commerce ecommerce emergence commerce lowered barriers entry
ecommercetimes e-commerce e-business business business internet information c-level executives small-to-mid-sized business managers	business	ecommercetimes commerce business business business internet level executives mid sized business managers
ecommerce guide ecommerce -guide news reviews technology solutions ecommerce -guide ecommerce business owners e-commerce news hardware software reviews tutorials technology solutions information	business	ecommerce guide ecommerce guide news reviews technology solutions ecommerce guide ecommerce business owners commerce news hardware software reviews tutorials technology solutions
communication howstuffworks ecommerce howstuffworks e-commerce e-commerce exploded e-commerce harness potential e-commerce affiliate programs	business	communication howstuffworks ecommerce howstuffworks commerce commerce exploded commerce harness potential commerce affiliate programs
drupal project ecommerce e-commerce drupal org version e-commerce historical developed version unsupported	business	drupal project ecommerce commerce drupal org version commerce historical developed version unsupported
managementhelp infomgnt cmmrce cmmrce guide e-commerce business internet web management library help address considerations setting e-commerce business considerations	business	managementhelp infomgnt cmmrce cmmrce guide commerce business internet web management library address considerations setting commerce business considerations
tradestation strategy trading automated online trading platform tradestation speed direct-access routing power test automate trading strategies	business	tradestation strategy trading automated online trading platform tradestation speed direct access routing power test automate trading strategies
answers topic trading trading definition synonyms answers com trad·ing carrying trade commerce engaged trade trading company frequented traders	business	answers topic trading trading definition synonyms answers carrying trade commerce engaged trade trading company frequented traders
scottrade online discount brokers online stock trading stock investing scottrade discount brokers investment services stocks options mutual funds treasury bonds retirement accounts flat commissions	business	scottrade online discount brokers online stock trading stock investing scottrade discount brokers investment services stocks options mutual funds treasury bonds retirement accounts flat commissions
gcitrading gci financial ltd online forex cfd trading online currency broker hour commission-free trading charts quotes insured client funds	business	gcitrading gci financial online forex cfd trading online currency broker hour commission free trading charts quotes insured client funds
fco gov servlet front pagename openmarket xcelerate showpage cid global economy foreign commonwealth office decade growth international trade investment flows exchange ideas knowledge societies	business	fco gov servlet front pagename openmarket xcelerate showpage cid global economy foreign commonwealth office decade growth international trade investment flows exchange ideas knowledge societies
globalenvision index fuseaction library globalecon category global envision global economy global economy articles discussions editorials global envision	business	globalenvision fuseaction library globalecon category global envision global economy global economy articles discussions editorials global envision
atimes atimes global economy asia online global economy asia online asia news hub news analysis regarding economics events trends business economy politics	business	atimes atimes global economy asia online global economy asia online asia news hub news analysis economics events trends business economy politics
atimes global econ global econ global economy story united nations annual roundup global economy developing nations hardest hit	business	atimes global econ global econ global economy story united nations annual roundup global economy developing nations hardest hit
imf external pubs weo index imf world economic outlook weo spillovers cycles semiannual world economic outlook reviews global macroeconomic developments forecasts growth cites risks table contents	business	imf external pubs weo imf economic outlook weo spillovers cycles semiannual economic outlook reviews global macroeconomic developments forecasts growth cites risks table contents
weforum events annualmeeting index world economic forum annual meeting global economy society midst historic shift agreed business political leaders plenary session shape	business	weforum events annualmeeting economic forum annual meeting global economy society midst historic shift agreed business political leaders plenary session shape
learner resources series resource global economy international team multinational perspective global economy market affect businesses	business	learner resources series resource global economy international team multinational perspective global economy market affect businesses
https etrade home welcome trade financial trade easy-to-use tools technology help maximize potential value assets-from trading investing banking	business	https etrade trade financial trade easy tools technology maximize potential assets trading investing banking
wikipedia wiki trade trade wikipedia encyclopedia trade voluntary exchange services trade commerce mechanism trade market	business	wikipedia wiki trade trade wikipedia encyclopedia trade voluntary exchange services trade commerce mechanism trade market
wikipedia wiki international trade international trade wikipedia encyclopedia international trade exchange services international boundaries territories countries	business	wikipedia wiki international trade international trade wikipedia encyclopedia international trade exchange services international boundaries territories countries
https fxtrade oanda oanda fxtrade currency trading forex trading online currency currency trading fxtrade leader online currency trading real-time execution forex charts quotes hour forex trading	business	https fxtrade oanda oanda fxtrade currency trading forex trading online currency currency trading fxtrade leader online currency trading real time execution forex charts quotes hour forex trading
tradingacademy online trading academy online trading trading education online on-site trading seminars courses utilizing software cds videos manuals	business	tradingacademy online trading academy online trading trading education online site trading seminars courses utilizing software cds videos manuals
orientaltrading party crafts party decorations toys oriental trading oriental trading company carries irresistible assortment fun value-priced products occasion value-priced party novelties	business	orientaltrading party crafts party decorations toys oriental trading oriental trading company carries irresistible assortment fun priced products occasion priced party novelties
tradingmarkets tradingmarkets investing stock market resources books trading swing trading forex trading options trading e-mini trading	business	tradingmarkets tradingmarkets investing stock market resources books trading swing trading forex trading options trading mini trading
daytrading about trading trading information experienced traders trading tutorials beginners trading systems	business	daytrading trading trading experienced traders trading tutorials beginners trading systems
ecommerce ecommerce corporation ecommerce corporation global organization developing deploying content delivery services ever-growing demands	business	ecommerce ecommerce corporation ecommerce corporation global organization developing deploying content delivery services growing demands
internetnews news e-commerce news managers daily e-commerce news managers business covering marketing transaction processing security retailing service delivered web	business	internetnews news commerce news managers daily commerce news managers business covering marketing transaction processing security retailing service delivered web
online commerce ecommerce guidebook web hosting ecommerce guidebook resources directory online transaction providers tutorial resources	business	online commerce ecommerce guidebook web hosting ecommerce guidebook resources directory online transaction providers tutorial resources
wilsonweb research web marketing research e-commerce collection annotated links web marketing ecommerce articles resources planet	business	wilsonweb web marketing commerce collection annotated links web marketing ecommerce articles resources planet
about reuters productinfo financial reuters professional products financial products powered reuters news data world solutions suitable financial market	business	reuters productinfo financial reuters professional products financial products powered reuters news data solutions suitable financial market
lafinancial financial credit union financial federal credit union owners excellence services confident products services	business	lafinancial financial credit union financial federal credit union owners excellence services confident products services
biz yahoo reports financials corporate financials news archive yahoo finance corporate financials news archive yahoo finance yahoo finance breaking news headlines articles companies economy markets	business	biz yahoo reports financials corporate financials news archive yahoo finance corporate financials news archive yahoo finance yahoo finance breaking news headlines articles companies economy markets
fma financial management association financial management association international fma established global leader developing disseminating knowledge	business	fma financial management association financial management association international fma established global leader developing disseminating knowledge
networkworld topics financial financial network world financial research center source news networking financial vertical market	business	networkworld topics financial financial network financial center source news networking financial vertical market
crown crown financial ministries equipping people learn apply teach god financial principles christ intimately serve	business	crown crown financial ministries equipping people learn apply teach god financial principles christ intimately serve
mathworks products finance mathworks financial toolbox analyze financial data financial toolbox functionality matlab tools quantitative financial modeling analytic prototyping	business	mathworks products finance mathworks financial toolbox analyze financial data financial toolbox functionality matlab tools quantitative financial modeling analytic prototyping
financialsense financial uncommon news views wise investor weekly internet broadcast news commentary jim puplava experts survive perfect financial storm	business	financialsense financial uncommon news views wise investor weekly internet broadcast news commentary jim puplava experts survive perfect financial storm
oasismanagement glossary oasis management comprehensive financial glossary oasis management comprehensive financial glossary investing dictionary	business	oasismanagement glossary oasis management comprehensive financial glossary oasis management comprehensive financial glossary investing dictionary
redcross services disaster american cross record location originals financial family documents birth marriage certificates wills deeds tax	business	redcross services disaster american cross record location originals financial family documents birth marriage certificates wills deeds tax
finweb financial web independent financial portal financial security realize true financial security strength financial	business	finweb financial web independent financial portal financial security realize true financial security strength financial
investorwords capital investment capital investment definition capital investment definition capital investment money paid purchase capital asset fixed asset	business	investorwords capital investment capital investment definition capital investment definition capital investment money paid purchase capital asset fixed asset
sbinfocanada about financing capinvestment capital investment capital investment definitions definitions capital investment capital investment applies businesses	business	sbinfocanada financing capinvestment capital investment capital investment definitions definitions capital investment capital investment applies businesses
capitalpros capital investment partners established investment banking capital formation firm	business	capitalpros capital investment partners established investment banking capital formation firm
wikipedia wiki capital economics capital economics wikipedia encyclopedia investment skills education building human capital knowledge capital investments intellectual property	business	wikipedia wiki capital economics capital economics wikipedia encyclopedia investment skills education building human capital knowledge capital investments intellectual property
https etrade home welcome trade financial trade easy-to-use tools technology help maximize potential value assets-from trading investing banking	business	https etrade trade financial trade easy tools technology maximize potential assets trading investing banking
businessfinance investment capital investment capital investment capital company capital cost consequent capital structure	business	businessfinance investment capital investment capital investment capital company capital cost consequent capital structure
biz yahoo yahoo financial glossary cross-referenced glossary financial	business	biz yahoo yahoo financial glossary cross referenced glossary financial
wikipedia wiki finance finance wikipedia encyclopedia personal financial decisions paying education financing durable financial management duplicate financial function	business	wikipedia wiki finance finance wikipedia encyclopedia personal financial decisions paying education financing durable financial management duplicate financial function
networksolutions commerce index ecommerce web hosting online shopping cart solutions network solutions customizable online shopping carts ecommerce web hosting learn getting selling online	business	networksolutions commerce ecommerce web hosting online shopping cart solutions network solutions customizable online shopping carts ecommerce web hosting learn selling online
networkworld topics ecommerce e-commerce e-business solutions network world e-commerce research center source e-business e-commerce news analysis research links network world	business	networkworld topics ecommerce commerce business solutions network commerce center source business commerce news analysis links network
volusion shopping cart software volusion ecommerce solutions ecommerce solutions volusion business heights volusion prices industry ecommerce web	business	volusion shopping cart software volusion ecommerce solutions ecommerce solutions volusion business heights volusion prices industry ecommerce web
inc resources ecommerce e-commerce resources ecommerce web design e-commerce e-commerce resources advice strategies business owners marketing online ecommerce web design maintaining	business	resources ecommerce commerce resources ecommerce web design commerce commerce resources advice strategies business owners marketing online ecommerce web design maintaining
searchcio techtarget sdefinition gci e-commerce definition whatis com definition e-commerce electronic commerce buying selling services internet world web	business	searchcio techtarget sdefinition gci commerce definition whatis definition commerce electronic commerce buying selling services internet web
ecommercetemplates shopping cart software dreamweaver frontpage css ecommerce shopping cart software integrated frontpage dreamweaver css golive ecommerce software templates	business	ecommercetemplates shopping cart software dreamweaver frontpage css ecommerce shopping cart software integrated frontpage dreamweaver css golive ecommerce software templates
litecommerce ecommerce software online store builder litecommerce build online store litecommerce professional ecommerce software solution internet ecommerce storefront	business	litecommerce ecommerce software online store builder litecommerce build online store litecommerce professional ecommerce software solution internet ecommerce storefront
sbdcnet sbic sbdcnet e-commerce guide low-cost out-of-the-box solutions e-commerce web store freemerchant com e-commerce web-o-pediafind edi asp mean	business	sbdcnet sbic sbdcnet commerce guide low cost box solutions commerce web store freemerchant commerce web pediafind edi asp
ecommerce guide news trends index commerce watch ecommerce -guide com forums fountain information haven chance check buzz	business	ecommerce guide news trends commerce watch ecommerce guide forums fountain haven chance check buzz
dmnews cms news commerce e-commerce news dmnews com international jewelry retailer beers likes crabtree evelyn panasonic body shop xerox e-commerce services firm venda	business	dmnews cms news commerce commerce news dmnews international jewelry retailer beers likes crabtree evelyn panasonic body shop xerox commerce services firm venda
finance yahoo yahoo finance stock quotes market news mortgage rates news portfolio management resources international market data message boards mortgage rates help manage financial life	business	finance yahoo yahoo finance stock quotes market news mortgage rates news portfolio management resources international market data message boards mortgage rates manage financial life
bloomberg bloomberg com business financial news	business	bloomberg bloomberg business financial news
money cnn business financial personal finance news cnnmoney practical personal finance advice calculators investing tips business news stock quotes financial market coverage editors	business	money cnn business financial personal finance news cnnmoney practical personal finance advice calculators investing tips business news stock quotes financial market coverage editors
world business finance political news financial international business finance economic political news comment analysis financial com	business	business finance political news financial international business finance economic political news comment analysis financial
thomson solutions financial thomson financial thomson financial signs generate inc business intelligence thomson financial crowned investor relations provider survey	business	thomson solutions financial thomson financial thomson financial signs generate business intelligence thomson financial crowned investor relations provider survey
financials financials com annual reports stock quotes stock quotes stock charts annual reports mutual funds company news company information resources investor	business	financials financials annual reports stock quotes stock quotes stock charts annual reports mutual funds company news company resources investor
senate leg state departments fiscalpol tracking overall tracking fund budget governor senate house comparisons fund budget governor senate house comparisons legislative session reflects enacted budget bills line-item vetoes tax bill	business	senate leg departments fiscalpol tracking tracking fund budget governor senate house comparisons fund budget governor senate house comparisons legislative session reflects enacted budget bills item vetoes tax bill
biz yahoo sector yahoo finance industry browser sector price market cap roe div yield debt equity price book value net	business	biz yahoo sector yahoo finance industry browser sector price market cap roe div yield debt equity price book net
commerce state wisconsin department commerce homepage agency delivery integrated services businesses news department information structure business	business	commerce wisconsin department commerce homepage agency delivery integrated services businesses news department structure business
libraries rutgers edu rul gateway research guides busi account shtml rutgers university libraries subject research guides business fasb financial accounting standards board sets authoritative standards accounting research manager rutgers-restricted access cch	business	libraries rutgers rul gateway guides busi account shtml rutgers university libraries subject guides business fasb financial accounting standards board sets authoritative standards accounting manager rutgers restricted access cch
office microsoft accounting accounting professional home page microsoft office online save organized business online accounting solution businesses download trial buy	business	office microsoft accounting accounting professional microsoft office online save organized business online accounting solution businesses download trial buy
aicpa members div career edu jlcs carey scholarships students participating graduate accounting program scholarships minority accounting students	business	aicpa div career jlcs carey scholarships students participating graduate accounting program scholarships minority accounting students
dmoz business accounting directory business accounting accounting virtual history illustrated annotated history accounting profession professional organization	business	dmoz business accounting directory business accounting accounting virtual history illustrated annotated history accounting profession professional organization
ucc com universal currency converter currency tool foreign exchange rate calculations internet up-to-the-minute currency rates	business	ucc universal currency converter currency tool foreign exchange rate calculations internet minute currency rates
com world favorite currency foreign exchange independently world favorite internet currency tools services	business	favorite currency foreign exchange independently favorite internet currency tools services
business directory accounting accounting resources services business com accounting resources accounting information business information profit loss statements capital budgeting	business	business directory accounting accounting resources services business accounting resources accounting business profit loss statements capital budgeting
oanda convert classic currency converter currencies currency converter currency pairs currency cheat sheet travelers rate conversion method	business	oanda convert classic currency converter currencies currency converter currency pairs currency cheat sheet travelers rate conversion method
finance yahoo currency currency converter yahoo finance view exchange rates currencies convert currencies countries	business	finance yahoo currency currency converter yahoo finance view exchange rates currencies convert currencies countries
wikipedia wiki currency currency wikipedia encyclopedia currency unit exchange facilitating transfer services money money serves medium	business	wikipedia wiki currency currency wikipedia encyclopedia currency unit exchange facilitating transfer services money money serves medium
rates calculator currency calculator currency exchange rates calculator convert currecy	business	rates calculator currency calculator currency exchange rates calculator convert currecy
rates exchange rates currencies convertion calculator exchange rates graph values data federal reserve bank	business	rates exchange rates currencies convertion calculator exchange rates graph values data federal reserve bank
bankofcanada exchform -year currency converter exchange rates rates statistics historical data tolar currencies converted euro daily noon rates -year lookup page	business	bankofcanada exchform currency converter exchange rates rates statistics historical data tolar currencies converted euro daily noon rates lookup
bloomberg invest calculators currency bloomberg com calculators currency calculator calculate cross currency rates currencies calculators page convert	business	bloomberg invest calculators currency bloomberg calculators currency calculator calculate cross currency rates currencies calculators convert
oanda oanda currency foreign exchange services trading oanda com currency currency foreign exchange rates investors travelers online businesses	business	oanda oanda currency foreign exchange services trading oanda currency currency foreign exchange rates investors travelers online businesses
taxsites tax accounting sites directory comprehensive index web-based tax accounting resources	business	taxsites tax accounting sites directory comprehensive web based tax accounting resources
finance pro smartpros accounting articles cpe career resources smartpros professional resources accounting finance insurance law	business	finance pro smartpros accounting articles cpe career resources smartpros professional resources accounting finance insurance law
gao gov web government accountability office investigative arm congress charged examining matters receipt payment public funds	business	gao gov web government accountability office investigative arm congress charged examining matters receipt payment public funds
cbc money story cprearns ref canadian pacific railway revenues shipments sulphur fertilizer coal helped canadian pacific railway ltd post second-quarter revenues company profits	business	cbc money story cprearns canadian pacific railway revenues shipments sulphur fertilizer coal helped canadian pacific railway post quarter revenues company profits
gizmodo gadgets revenues revenues gizmodo motorola revenues quarters row termination fees zander motorola revenues	business	gizmodo gadgets revenues revenues gizmodo motorola revenues quarters row termination fees zander motorola revenues
gizmodo gadgets business motorolas revenues down quarters row may see early termination fees for zander business motorola revenues quarters row motorola revenues reporting quarter loss phone	business	gizmodo gadgets business motorolas revenues quarters row termination fees zander business motorola revenues quarters row motorola revenues reporting quarter loss phone
accounting welcome accounting com accounting resource accounting com source job searches employment career jobs recruiting job listings	business	accounting accounting accounting resource accounting source job searches employment career jobs recruiting job listings
wikipedia wiki accounting accountancy wikipedia encyclopedia financial accounting branch accounting historically accounting accountancy accurate financial reports	business	wikipedia wiki accounting accountancy wikipedia encyclopedia financial accounting branch accounting historically accounting accountancy accurate financial reports
careers accounting careers accounting jobs-in- accounting com information key careers accounting	business	careers accounting careers accounting jobs accounting key careers accounting
bls gov oco ocos accountants auditors public accountants accounting auditing tax consulting accountants auditors employed public accounting firms	business	bls gov oco ocos accountants auditors public accountants accounting auditing tax consulting accountants auditors employed public accounting firms
accounting careerbuilder accounting jobs careerbuilder com accounting jobs job search careerbuilder leader job search sites access jobs	business	accounting careerbuilder accounting jobs careerbuilder accounting jobs job search careerbuilder leader job search sites access jobs
nysscpa prof library guide accounting terminology guide indexed glossary accounting york society cpa	business	nysscpa prof library guide accounting terminology guide indexed glossary accounting york society cpa
ipl div subject browse bus internet public library accounting website features full-text articles accounting accounting technology practical accountant newswire	business	ipl div subject browse bus internet public library accounting website features text articles accounting accounting technology practical accountant newswire
fasb fasb financial accounting standards board designated sector organization establishes financial accounting reporting standards fasb standards	business	fasb fasb financial accounting standards board designated sector organization establishes financial accounting reporting standards fasb standards
accounting rutgers edu rutgers accounting web accounting resources irrespective university	business	accounting rutgers rutgers accounting web accounting resources irrespective university
quickmba accounting accounting accounting tutorials students professionals	business	quickmba accounting accounting accounting tutorials students professionals
topix business accounting accounting news topix accounting news continually updated net	business	topix business accounting accounting news topix accounting news continually updated net
lib lsu edu bus account lsu libraries business subject guides accounting behavior organizations section aaa access links cpa societies tax accounting associations boards	business	lib lsu bus account lsu libraries business subject guides accounting behavior organizations aaa access links cpa societies tax accounting associations boards
marketprices markets currencies com market data currencies abbreviations rate market rate rate principal rate tourist rate currency fixed dollar floating	business	marketprices markets currencies market data currencies abbreviations rate market rate rate principal rate tourist rate currency fixed dollar floating
gocurrency currency converter currency exchange currency exchange rates currency converter currency insights influence exchange rates currencies currency conversion	business	gocurrency currency converter currency exchange currency exchange rates currency converter currency insights influence exchange rates currencies currency conversion
coins edu colcurrency colonial currency table contents exhibit features colonial paper currency ranging louisiana issues fractional currency privately emitted	business	coins colcurrency colonial currency table contents exhibit features colonial paper currency ranging louisiana issues fractional currency privately emitted
frbsf currency historical american currency exhibit frbsf federal reserve bank san francisco online exhibit historical american currency	business	frbsf currency historical american currency exhibit frbsf federal reserve bank san francisco online exhibit historical american currency
carcare tires wheels inflation shtml tires wheels tire inflation description tire inflation pressure air pressure carmaker tire vehicle	business	carcare tires wheels inflation shtml tires wheels tire inflation description tire inflation pressure air pressure carmaker tire vehicle
csep phys utk edu astr lect cosmology inflation inflationary universe theory inflation universe theory inflation unexpected bonus	business	csep phys utk astr lect cosmology inflation inflationary universe theory inflation universe theory inflation unexpected bonus
westegg inflation infl cgi inflation calculator remember calculate inflation try	business	westegg inflation infl cgi inflation calculator remember calculate inflation
oregonstate edu cla polisci faculty sahr sahr inflation conversion factors dollars inflation conversion factor tables excel pdf download conversion factors excel pdf revised reflect	business	oregonstate cla polisci faculty sahr sahr inflation conversion factors dollars inflation conversion factor tables excel pdf download conversion factors excel pdf revised reflect
washingtonpost dyn content article inflation target shifting washingtonpost com investors financial analysts ride seat ben bernanke chrysler sebring convertible whining	business	washingtonpost dyn content article inflation target shifting washingtonpost investors financial analysts ride seat ben bernanke chrysler sebring convertible whining
statistics gov cci nugget national statistics online cpi annual inflation government target measure cent rpix inflation items rpi excluding mortgage payments	business	statistics gov cci nugget national statistics online cpi annual inflation government target measure cent rpix inflation items rpi excluding mortgage payments
irle berkeley edu library index institute research labor employment library labor economic news immigration news labor events resources irle library topical exhibit immigration resources	business	irle berkeley library institute labor employment library labor economic news immigration news labor events resources irle library topical exhibit immigration resources
iir berkeley edu iir library institute research labor employment library institute research labor employment labor economic news immigration news labor events resources library blog digest	business	iir berkeley iir library institute labor employment library institute labor employment labor economic news immigration news labor events resources library blog digest
qcpages cuny edu workered laborresource labor resource center queens college labor resource center dedicated revitalizing democratic labor movement labor efforts	business	qcpages cuny workered laborresource labor resource center queens college labor resource center dedicated revitalizing democratic labor movement labor efforts
gwu edu labor resources labor studies resource page george washington university directory sites address labor economics issues policy issues affirmative action	business	gwu labor resources labor studies resource george washington university directory sites address labor economics issues policy issues affirmative action
lrc umb edu umass labor resource center home page labor resource center lrc educational research programs workers labor community organizations mission lrc	business	lrc umb umass labor resource center labor resource center lrc educational programs workers labor community organizations mission lrc
ncrve berkeley edu centerfocus guide child labor resource guide child labor resource guide contact department labor information child labor law	business	ncrve berkeley centerfocus guide child labor resource guide child labor resource guide contact department labor child labor law
ranknfile uelinks web links labor resources labor resources labor lists directories resources information labor resources web links	business	ranknfile uelinks web links labor resources labor resources labor lists directories resources labor resources web links
dol gov dol audience aud employers department labor audience employers disability resources federal contract compliance grants contracts information services department labor dol employers	business	dol gov dol audience aud employers department labor audience employers disability resources federal contract compliance grants contracts services department labor dol employers
dol gov dol topic youthlabor resourcesforeducators department labor topic youth labor department labor resources teaching aids educators developing class curricula	business	dol gov dol topic youthlabor resourcesforeducators department labor topic youth labor department labor resources teaching aids educators developing class curricula
minneapolisfed research data calc federal reserve bank minneapolis consumer price index calculator consumer price index inflation rates consumer price index inflation rates estimate cpi calculations	business	minneapolisfed data calc federal reserve bank minneapolis consumer price calculator consumer price inflation rates consumer price inflation rates estimate cpi calculations
seattlepi nwsource business msftearns microsoft annual revenues percent microsoft corp surpassed billion annual revenue matched quarterly profit estimates wall street	business	seattlepi nwsource business msftearns microsoft annual revenues percent microsoft corp surpassed billion annual revenue matched quarterly profit estimates wall street
mises efandi inflation government funds rearmament inflation quantity money circulation	business	mises efandi inflation government funds rearmament inflation quantity money circulation
inflationdata welcome inflation data com inflationdata com dedicated inflation rate data web information monetary	business	inflationdata inflation data inflationdata dedicated inflation rate data web monetary
stuff zealand source business stock market currency news business stock market rates currency news stuff business stuff news resources fairfax	business	stuff zealand source business stock market currency news business stock market rates currency news stuff business stuff news resources fairfax
fieba pcc personal currency converter fieba ltd	business	fieba pcc personal currency converter fieba
bank china static index bank china boc credit card double- currency global remittance factoring business trading boci china state-owned	business	bank china static bank china boc credit card double currency global remittance factoring business trading boci china owned
sun docs api util currency currency java platform currency currencies iso currency codes iso maintenance agency information	business	sun docs api util currency currency java platform currency currencies iso currency codes iso maintenance agency
randomhouse doubleday currency currency sign currency connection newsletter currency titles discount copies sales promotions	business	randomhouse doubleday currency currency sign currency connection newsletter currency titles discount copies sales promotions
wikipedia wiki inflation inflation wikipedia encyclopedia mainstream economics word inflation persistent price level measured standard level purchasing	business	wikipedia wiki inflation inflation wikipedia encyclopedia mainstream economics word inflation persistent price level measured standard level purchasing
wikipedia wiki cosmic inflation cosmic inflation wikipedia encyclopedia physical cosmology cosmic inflation idea nascent universe phase exponential expansion driven	business	wikipedia wiki cosmic inflation cosmic inflation wikipedia encyclopedia physical cosmology cosmic inflation idea nascent universe phase exponential expansion driven
westegg inflation inflation calculator money inflation consumer price index	business	westegg inflation inflation calculator money inflation consumer price
bls gov cpi consumer price index home page inflation calculator lists designates pre- weight item structure indexes	business	bls gov cpi consumer price inflation calculator lists designates pre weight item structure indexes
bls gov bls inflation overview bls statistics inflation consumer inflation upward price movement services economy bls indexes measure	business	bls gov bls inflation overview bls statistics inflation consumer inflation upward price movement services economy bls indexes measure
inflationdata inflation inflation rate currentinflation inflation inflation updated monthly inflation web inflation calculated	business	inflationdata inflation inflation rate currentinflation inflation inflation updated monthly inflation web inflation calculated
econlib library enc inflation inflation ranson concise encyclopedia economics inflation ranson concise encyclopedia economics	business	econlib library enc inflation inflation ranson concise encyclopedia economics inflation ranson concise encyclopedia economics
map gsfc nasa gov uni uni inflation wmap cosmology inflationary universe inflation theory period exponential expansion inflation theory developed alan guth andrei linde	business	map gsfc nasa gov uni uni inflation wmap cosmology inflationary universe inflation theory period exponential expansion inflation theory developed alan guth andrei linde
economics about helpforeconomicsstudents inflation inflation article rates beginners answers question inflation	business	economics helpforeconomicsstudents inflation inflation article rates beginners answers question inflation
astro ucla edu wright cosmo cosmology tutorial inflation predicts statistical pattern anisotropy observed pattern anisotropy inflation	business	astro ucla wright cosmo cosmology tutorial inflation predicts statistical pattern anisotropy observed pattern anisotropy inflation
cgi bin cpicalc inflation calculator	business	cgi bin cpicalc inflation calculator
members aol maraim bedrest preterm labor bedrest resources resources corrections contact maraim aol com	business	aol maraim bedrest preterm labor bedrest resources resources corrections contact maraim aol
https edu policies fiscal rev gift revenues title gift revenues category fiscal revenues responsible gift revenues arise item value university donor cash gift revenues classified	business	https policies fiscal rev gift revenues title gift revenues category fiscal revenues responsible gift revenues item university donor cash gift revenues classified
theregister mobile services report non-sms revenues mobile operators reported revenue services sms quarter period	business	theregister mobile services report sms revenues mobile operators reported revenue services sms quarter period
fao private fao sector thriving sector well-functioning markets key factors economic growth sustainable development agriculture food fisheries	business	fao private fao sector thriving sector functioning markets key factors economic growth sustainable development agriculture food fisheries
ourpublicservice ops programs psc partnership public service sector council leadership awards dinner partnership public service sector council psc connects	business	ourpublicservice ops programs psc partnership public service sector council leadership awards dinner partnership public service sector council psc connects
adb privatesector default sector development finance adb org expanding sector activities adb fight poverty asia pacific region adb sector development	business	adb privatesector default sector development finance adb org expanding sector activities adb fight poverty asia pacific region adb sector development
transparency global priorities private sector sector global priorities home transparency international goal sector company behaviour developing standards practice countering bribery	business	transparency global priorities private sector sector global priorities transparency international goal sector company behaviour developing standards practice countering bribery
ifc economics international finance corporation financial sector introduction financial sector development program organized	business	ifc economics international finance corporation financial sector introduction financial sector development program organized
ifc competition ifc-ft essay competition ifc-ft essay competition theme sector development markets insight sector development psd research	business	ifc competition ifc ft essay competition ifc ft essay competition theme sector development markets insight sector development psd
wikipedia wiki private sector sector wikipedia encyclopedia sector fundamental economy profit controlled enterprises	business	wikipedia wiki private sector sector wikipedia encyclopedia sector fundamental economy profit controlled enterprises
ornl gov sci techresources human genome project privatesector shtml hgp sector information hgp technologies catalyzed life sciences industry explanations partnerships government industry	business	ornl gov sci techresources human genome project privatesector shtml hgp sector hgp technologies catalyzed life sciences industry explanations partnerships government industry
mpdf ifc mpdf mekong sector development facility vietnam access land issues sector government sector lao business forum	business	mpdf ifc mpdf mekong sector development facility vietnam access land issues sector government sector lao business forum
itu int cgi bin htsh scripts list sec languageid sector	business	itu int cgi bin htsh scripts list languageid sector
weforum initiatives harnessing private sector harnessing sector capabilities public incentives sector apply competencies malaria reduction sector player sustaining	business	weforum initiatives harnessing private sector harnessing sector capabilities public incentives sector apply competencies malaria reduction sector player sustaining
iadb pri sector inter-american development bank interamerican development bank idb bid sector sector department pri infrastructure energy power transportation toll roads water	business	iadb pri sector inter american development bank interamerican development bank idb bid sector sector department pri infrastructure energy power transportation toll roads water
imf external exr facts privsec factsheet imf sector imf examining issues sector forestalling resolving financial crises	business	imf external exr privsec factsheet imf sector imf examining issues sector forestalling resolving financial crises
adb privatesector finance default sector finance adb org adb unique sector projects development impact financial sector infrastructure sector	business	adb privatesector finance default sector finance adb org adb unique sector projects development impact financial sector infrastructure sector
acdi cida cidaweb acdicida nsf jud qjj sector development poverty reduction efforts address sector developing countries sector comprised micro	business	acdi cida cidaweb acdicida nsf jud qjj sector development poverty reduction efforts address sector developing countries sector comprised micro
firstresearch industry research paper products manufacture paper products manufacture industry paper products manufacture industry research specializing paper products manufacture industry research paper products manufacture market research paper products	business	firstresearch industry paper products manufacture paper products manufacture industry paper products manufacture industry specializing paper products manufacture industry paper products manufacture market paper products
tga gov docs gmpcodau australian code manufacturing practice medicinal products australian code gmp medicinal products dated australian code gmp medicinal products dated	business	tga gov docs gmpcodau australian code manufacturing practice medicinal products australian code gmp medicinal products dated australian code gmp medicinal products dated
marketresearch product display productid paper products manufacture paper products manufacture companies manufacture paper products annual product revenue billion	business	marketresearch product display productid paper products manufacture paper products manufacture companies manufacture paper products annual product revenue billion
dfma truecost paper true cost overseas manufacture product design costs manufacturing products china manufacturing redesigned product china save	business	dfma truecost paper true cost overseas manufacture product design costs manufacturing products china manufacturing redesigned product china save
thomasnet thomasnet cnc machining metal stamping gaskets fasteners searchable database information products services cad drawings	business	thomasnet thomasnet cnc machining metal stamping gaskets fasteners searchable database products services cad drawings
crnano products nanotechnology products molecular manufacturing product structural design simplest products software-controlled extra cost manufacturing	business	crnano products nanotechnology products molecular manufacturing product structural design simplest products software controlled extra cost manufacturing
epa gov wastewise wrr buyman buy manufacture recycled wastewise epa organizations manufactured products recycled content percentage recycled content manufactured products	business	epa gov wastewise wrr buyman buy manufacture recycled wastewise epa organizations manufactured products recycled content percentage recycled content manufactured products
osha gov dcsp products topics concreteproducts index safety health topics products safety issues phases production manufacture portland cement pre-cast products	business	osha gov dcsp products topics concreteproducts safety health topics products safety issues phases production manufacture portland cement pre cast products
pentairpool welcome pentair pool products inc manufacturer manufacturer filters sanitizers cleaners heaters pumps california	business	pentairpool pentair pool products manufacturer manufacturer filters sanitizers cleaners heaters pumps california
infoworld article hnciscoindia cisco manufacture products india infoworld news cisco systems manufacturing facility chennai south india products domestic indian market	business	infoworld article hnciscoindia cisco manufacture products india infoworld news cisco systems manufacturing facility chennai south india products domestic indian market
durcomfg screw machine products manufacturing company multi-spindle screw machine products precision clients broadest services production	business	durcomfg screw machine products manufacturing company multi spindle screw machine products precision clients broadest services production
europa enterprise pharmaceuticals eudralex homev eudralex volume medicinal products human veterinary annex manufacture biological medicinal products human annex manufacture products human blood human plasma	business	europa enterprise pharmaceuticals eudralex homev eudralex volume medicinal products human veterinary annex manufacture biological medicinal products human annex manufacture products human blood human plasma
cdc gov niosh rubberhr niosh hazard review rubber products manufacturing workers exposed hazards inhalation skin absorption rubber processing product manufacturing physical hazards	business	cdc gov niosh rubberhr niosh hazard review rubber products manufacturing workers exposed hazards inhalation skin absorption rubber processing product manufacturing physical hazards
hyperlinktech web oem products hyperlink technologies equipment manufacturer oem products hyperlink equipment manufacturers oem solutions design product adaptive intuitive innovative creative	business	hyperlinktech web oem products hyperlink technologies equipment manufacturer oem products hyperlink equipment manufacturers oem solutions design product adaptive intuitive innovative creative
allproducts allproducts com manufacturers directory products database global marketplace manufacture directory exporters importers wholesalers volume buyers suppliers product directory	business	allproducts allproducts manufacturers directory products database global marketplace manufacture directory exporters importers wholesalers volume buyers suppliers product directory
lonmark certifications members shtml lonmark certifications lonmark manufacture listed lonmark product catalog certified devices lonmark manufacturing products	business	lonmark certifications shtml lonmark certifications lonmark manufacture listed lonmark product catalog certified devices lonmark manufacturing products
partnerproducts autodesk catalog industry industry mfg autodesk partner products services manufacturing outsourcing mass customization global competitiveness reshaping industry design manufacture products	business	partnerproducts autodesk catalog industry industry mfg autodesk partner products services manufacturing outsourcing mass customization global competitiveness reshaping industry design manufacture products
inventionhome inventor services manufacturing overview invention manufacturing inventors manufacture building developing invention product manufacturing partnerships china taiwan	business	inventionhome inventor services manufacturing overview manufacturing inventors manufacture building developing product manufacturing partnerships china taiwan
dfid gov pubs files dfid private sector dfid sector sector risks principles dfid approaches sector development dfid collaborates sector representatives	business	dfid gov pubs files dfid private sector dfid sector sector risks principles dfid approaches sector development dfid collaborates sector representatives
psdblog worldbank about psd blog world bank sector development blog psd blog gathers news resources christine bowers economist sector development	business	psdblog worldbank psd blog bank sector development blog psd blog gathers news resources christine bowers economist sector development
psdblog worldbank psdblog predicting predicting category psd blog world bank knowledge services sector development reading lists toolkits journals surveys business database	business	psdblog worldbank psdblog predicting predicting category psd blog bank knowledge services sector development reading lists toolkits journals surveys business database
artsusa private sector affairs arts and business council about default overview arts business council americans arts arts business council americans arts housed sector affairs department americans arts targets business	business	artsusa private sector affairs arts business council default overview arts business council americans arts arts business council americans arts housed sector affairs department americans arts targets business
ogilvypr ogilvy public relations specializes public relations marketing healthcare technology industries public affairs	business	ogilvypr ogilvy public relations specializes public relations marketing healthcare technology industries public affairs
insidepr email insideprcomments gmail com call comment line visit blubrry comment	business	insidepr email insideprcomments gmail call comment visit blubrry comment
wikipedia wiki revenue revenue wikipedia encyclopedia revenue business money company activities period sales products	business	wikipedia wiki revenue revenue wikipedia encyclopedia revenue business money company activities period sales products
investopedia terms revenue revenue investopedia com investing education comprehensive investing dictionary web articles tutorials	business	investopedia terms revenue revenue investopedia investing education comprehensive investing dictionary web articles tutorials
hmrc gov revenue customs home page information customs tax department prototype on-line vat value tax system	business	hmrc gov revenue customs customs tax department prototype vat tax system
irrv irrv home page institute revenues rating valuation international property tax institute ipti institute revenues rating valuation irrv co-operation enterprise centre	business	irrv irrv institute revenues rating valuation international property tax institute ipti institute revenues rating valuation irrv operation enterprise centre
arstechnica news ars post amd second quarter revenues profits down amd quarter revenues profits quarter amd share revenues billion harsh reversal	business	arstechnica news ars post amd quarter revenues profits amd quarter revenues profits quarter amd share revenues billion harsh reversal
eia doe gov emeu cabs opecrev opec revenues sheet	business	eia doe gov emeu cabs opecrev opec revenues sheet
valleywag tech mythbusting facebooks fake revenues mythbusting facebook fake revenues valleywag people facebook revenues sales revenue guarantee microsoft	business	valleywag tech mythbusting facebooks fake revenues mythbusting facebook fake revenues valleywag people facebook revenues sales revenue guarantee microsoft
searchengineland microsoft reports revenues microsoft earnings release microsoft corp announced revenue billion quarter	business	searchengineland microsoft reports revenues microsoft earnings release microsoft corp announced revenue billion quarter
iab news iab press release internet advertising revenues york interactive advertising bureau iab pricewaterhousecoopers pwc announced internet advertising revenues	business	iab news iab press release internet advertising revenues york interactive advertising bureau iab pricewaterhousecoopers pwc announced internet advertising revenues
blog seattlepi nwsource microsoft archives microsoft quarterly profit revenues osb operating loss driven cost revenue grew headcount-related costs	business	blog seattlepi nwsource microsoft archives microsoft quarterly profit revenues osb operating loss driven cost revenue grew headcount costs
sportsvenues revenues sports venues stadium arena guide revenues sports venues pricing information stadium arena luxury seats club seats rights sales	business	sportsvenues revenues sports venues stadium arena guide revenues sports venues pricing stadium arena luxury seats club seats rights sales
arstechnica news ars post intels revenues but margins down price war takes toll intel revenues margins price war toll intel revenues percent versus net income whopping percent headlines earnings	business	arstechnica news ars post intels revenues margins price war takes toll intel revenues margins price war toll intel revenues percent versus net income whopping percent headlines earnings
investor google releases google investor relations google reported revenues billion quarter quarter revenues	business	investor google releases google investor relations google reported revenues billion quarter quarter revenues
ssdesign librarypr library media informative -minute video presentation jessica padilla marketing coordinator carlsbad calif city library	business	ssdesign librarypr library media informative minute video presentation jessica padilla marketing coordinator carlsbad calif city library
census gov govs qtax quarterly summary government tax revenues census bureau data quarterly summary tax revenue quarterly estimates tax revenue tax	business	census gov govs qtax quarterly summary government tax revenues census bureau data quarterly summary tax revenue quarterly estimates tax revenue tax
com directory businesses jobs press releases products comprehensive directory businesses jobs products services press releases news articles industries promote business	business	directory businesses jobs press releases products comprehensive directory businesses jobs products services press releases news articles industries promote business
topix business public relations public relation news topix public relations news continually updated learn how-to target campaigns profitable markets worth	business	topix business public relations public relation news topix public relations news continually updated learn target campaigns profitable markets worth
rru worldbank discussions online discussions sector development world bank e-discussions topical sector development issues moderated experts	business	rru worldbank discussions online discussions sector development bank discussions topical sector development issues moderated experts
wikipedia wiki public relations public relations wikipedia encyclopedia public relations managing communication organization business maintain positive image	business	wikipedia wiki public relations public relations wikipedia encyclopedia public relations managing communication organization business maintain positive image
bls gov oco ocos public relations specialists opportunities college graduates degree public relations journalism communications-related field	business	bls gov oco ocos public relations specialists opportunities college graduates degree public relations journalism communications field
prsa public relations society america prsa professional organization public relations specialists business consulting firms government associations schools	business	prsa public relations society america prsa professional organization public relations specialists business consulting firms government associations schools
managementhelp pblc rel pblc rel public media relations learn public media relations impression advertising marketing promotion	business	managementhelp pblc rel pblc rel public media relations learn public media relations impression advertising marketing promotion
aboutpublicrelations public relations articles comprehensive collection how-to articles public relations features links	business	aboutpublicrelations public relations articles comprehensive collection articles public relations features links
princetonreview cte profiles dayinlife careerid public relations public relations specialist image shaper job generate positive publicity client enhance reputation	business	princetonreview cte profiles dayinlife careerid public relations public relations specialist image shaper job generate positive publicity client enhance reputation
prnewswire newswire news distribution targeting monitoring news press release distribution services business marketing corporate public relations investor relations government organizational	business	prnewswire newswire news distribution targeting monitoring news press release distribution services business marketing corporate public relations investor relations government organizational
edelman edelman service global public relations firm company profile management team practice industries served histories client listings	business	edelman edelman service global public relations firm company profile management team practice industries served histories client listings
odwyerpr dwyer public relations news odwyerpr com features breaking news public relations industry database firms listing service firms client search tool job postings	business	odwyerpr dwyer public relations news odwyerpr features breaking news public relations industry database firms listing service firms client search tool job postings
misukanisodden misukanis odden public relations firm agency minneapolis tech public relations marketing agency specializes technology public relations lead sales generation programs brand development	business	misukanisodden misukanis odden public relations firm agency minneapolis tech public relations marketing agency specializes technology public relations lead sales generation programs brand development
ketchum welcome ketchum com ketchum public relations marketing agency specializes corporate product positioning practice expertise covers consumer marketing	business	ketchum ketchum ketchum public relations marketing agency specializes corporate product positioning practice expertise covers consumer marketing
prwatch center media democracy publishers watch wiki-based investigative journalism collaborative focused public relations industry whistle-blowing manipulative misleading practices	business	prwatch center media democracy publishers watch wiki based investigative journalism collaborative focused public relations industry whistle blowing manipulative misleading practices
online online public relations home page online resource public relations professionals	business	online online public relations online resource public relations professionals
prstudies typepad studies privatising public realm witnessing deconstruction mass media masses media public relations	business	prstudies typepad studies privatising public realm witnessing deconstruction mass media masses media public relations
prmuseum museum public relations public relations pioneers historical biographies studeies bernays byoir kendrix page	business	prmuseum museum public relations public relations pioneers historical biographies studeies bernays byoir kendrix
wikipedia wiki market sector market sector wikipedia encyclopedia market sector economics finance businesses buying selling services	business	wikipedia wiki market sector market sector wikipedia encyclopedia market sector economics finance businesses buying selling services
stromberg attendance labor management software solutions stromberg stromberg announces acquisition labor resource management inc stromberg aligns unifocus single-source end-to-end	business	stromberg attendance labor management software solutions stromberg stromberg announces acquisition labor resource management stromberg aligns unifocus single source
uesf labor uesf labor career resources fair labor standards act findlaw labor law national employment lawyers association resource links unemployment insurance code	business	uesf labor uesf labor career resources fair labor standards findlaw labor law national employment lawyers association resource links unemployment insurance code
nationmaster graph eco fis yea economy fiscal year nationmaster statistics fiscal country economy fiscal country economy statistics graphs maps pie charts	business	nationmaster graph eco fis yea economy fiscal nationmaster statistics fiscal country economy fiscal country economy statistics graphs maps pie charts
gamespot news part subj nintendo fiscal bang wii news gamespot wii sports wii news gamespot gamespot in-depth news wii sports games game announcements	business	gamespot news subj nintendo fiscal bang wii news gamespot wii sports wii news gamespot gamespot depth news wii sports games game announcements
cpan dist datetime fiscal year jesse shy datetime- fiscal search cpan org datetime- fiscal datetime fiscal calculate fiscal arbitrary	business	cpan dist datetime fiscal jesse shy datetime fiscal search cpan org datetime fiscal datetime fiscal calculate fiscal arbitrary
ustreas gov offices tax policy library bluebk explanations administration fiscal administration fiscal revenue proposals department treasury document adobe acrobat format	business	ustreas gov offices tax policy library bluebk explanations administration fiscal administration fiscal revenue proposals department treasury document adobe acrobat format
access gpo gov congress house appropriations appro house committee appropriations fiscal hearings house committee appropriations online gpo access membership jurisdiction rules committee publications	business	access gpo gov congress house appropriations appro house committee appropriations fiscal hearings house committee appropriations online gpo access membership jurisdiction rules committee publications
seattlepi nwsource classical sso symphony opera ballet fiscal black seattle symphony seattle opera pacific northwest ballet fiscal black	business	seattlepi nwsource classical sso symphony opera ballet fiscal black seattle symphony seattle opera pacific northwest ballet fiscal black
science doe gov grants closed notices issued fiscal office science office energy research notices issued fiscal reference	business	science doe gov grants closed notices issued fiscal office science office energy notices issued fiscal reference
thomas loc gov cgi bin query enr intelligence authorization act fiscal	business	thomas loc gov cgi bin query enr intelligence authorization fiscal
defenselink mil comptroller defbudget index office secretary defense budget materials financial summary tables fiscal financial summary tables fiscal listing military personnel programs reserve component	business	defenselink mil comptroller defbudget office secretary defense budget materials financial summary tables fiscal financial summary tables fiscal listing military personnel programs reserve component
umsl edu services govdocs wofact fields cia world factbook field listing fiscal fiscal afghanistan albania calendar algeria calendar american samoa	business	umsl services govdocs wofact fields cia factbook field listing fiscal fiscal afghanistan albania calendar algeria calendar american samoa
umsl edu services govdocs wofact fields cia world factbook field listing fiscal entry country accounting period calendar	business	umsl services govdocs wofact fields cia factbook field listing fiscal entry country accounting period calendar
sss gov perfplan service system publications fiscal agency goals objectives performance measurement target goals	business	sss gov perfplan service system publications fiscal agency goals objectives performance measurement target goals
usdoj gov oip foiapost foiapost foia post summary annual foia reports fiscal annual reports prepared fiscal prepared foia	business	usdoj gov oip foiapost foiapost foia post summary annual foia reports fiscal annual reports prepared fiscal prepared foia
money cnn data commodities commodities trading prices data cnnmoney trading prices data news headlines commodity market exchange	business	money cnn data commodities commodities trading prices data cnnmoney trading prices data news headlines commodity market exchange
thomas loc gov home approp app status appropriations legislation fiscal library congress access status appropriations bills fiscal	business	thomas loc gov approp app status appropriations legislation fiscal library congress access status appropriations bills fiscal
science doe gov grants closed notices issued fiscal applications submitted prior fiscal funding permit timely award fiscal	business	science doe gov grants closed notices issued fiscal applications submitted prior fiscal funding permit timely award fiscal
whitehouse gov omb budget budget united government budget united government fiscal budget message president information president budget management	business	whitehouse gov omb budget budget united government budget united government fiscal budget message president president budget management
gpoaccess gov usbudget fiscal budget budget united text gpo access fiscal	business	gpoaccess gov usbudget fiscal budget budget united text gpo access fiscal
catalaw topics commerce shtml catalaw business commercial law german business law joachim rudo llrx german business commercial laws guide translations english auxiliary	business	catalaw topics commerce shtml catalaw business commercial law german business law joachim rudo llrx german business commercial laws guide translations english auxiliary
megalaw top commercial commercial law megalaw com commercial law codes regulations web links resources megalaw com	business	megalaw top commercial commercial law megalaw commercial law codes regulations web links resources megalaw
cisgw law pace edu vis willem vis international commercial arbitration moot goal vis arbitral moot foster study international commercial law arbitration resolution international business disputes	business	cisgw law pace vis willem vis international commercial arbitration moot goal vis arbitral moot foster study international commercial law arbitration resolution international business disputes
jiclt journal international commercial law technology jiclt journal international commercial law technology jiclt peer-reviewed open-access scholarly journal dedicated	business	jiclt journal international commercial law technology jiclt journal international commercial law technology jiclt peer reviewed access scholarly journal dedicated
lexmercatoria lexmercatoria net	business	lexmercatoria lexmercatoria net
export gov iraq iraq commercial law current iraq commercial law overview revised doc iraqi commercial agency law sabah ali mahmoud eastern commercial law	business	export gov iraq iraq commercial law current iraq commercial law overview revised doc iraqi commercial agency law sabah ali mahmoud eastern commercial law
commercial law blogspot commercial law blog discusses scots commercial law written academics university edinburgh company commercial	business	commercial law blogspot commercial law blog discusses scots commercial law written academics university edinburgh company commercial
cldp gov cldp commercial law development program home commercial law development program cldp program department commerce office counsel uniquely tasked	business	cldp gov cldp commercial law development program commercial law development program cldp program department commerce office counsel uniquely tasked
jus uio lex mercatoria international commercial law e-commerce dedicated provision information international commercial law subsidiary commerce information technologies	business	jus uio lex mercatoria international commercial law commerce dedicated provision international commercial law subsidiary commerce technologies
law depaul edu students organizations journals student orgs lawblj depaul business commercial law journal depaul business commercial law journal affiliated commercial law league america clla student-run organization	business	law depaul students organizations journals student orgs lawblj depaul business commercial law journal depaul business commercial law journal affiliated commercial law league america clla student organization
unpan intradoc groups public documents untc unpan commercial law latvia commercial activities regulated law provisions civil law apply commercial activities insofar	business	unpan intradoc public documents untc unpan commercial law latvia commercial activities regulated law provisions civil law apply commercial activities
ccls edu queen university london centre commercial law centre focuses commercial law teaching research expertise arbitration intellectual property taxation financial law	business	ccls queen university london centre commercial law centre focuses commercial law teaching expertise arbitration intellectual property taxation financial law
wikipedia wiki fiscal year fiscal wikipedia encyclopedia fiscal financial accounting reference -month period calculating annual yearly financial statements	business	wikipedia wiki fiscal fiscal wikipedia encyclopedia fiscal financial accounting reference month period calculating annual yearly financial statements
lectlaw def fiscal definition fiscal lectric law library legal lexicon	business	lectlaw def fiscal definition fiscal lectric law library legal lexicon
gpoaccess gov usbudget browse budget united government browse fiscal budget united government browse fiscal download budget zip file documents zip file	business	gpoaccess gov usbudget browse budget united government browse fiscal budget united government browse fiscal download budget zip file documents zip file
wikipedia wiki commodity commodity wikipedia encyclopedia commodity demand qualitative differentiation market	business	wikipedia wiki commodity commodity wikipedia encyclopedia commodity demand qualitative differentiation market
forbes commodities commodities commodity market news commodity investing commodity market news commodity investing news headlines forbes com	business	forbes commodities commodities commodity market news commodity investing commodity market news commodity investing news headlines forbes
bloomberg markets commodities cfutures bloomberg com commodity futures commodities trade exchanges trading sessions price	business	bloomberg markets commodities cfutures bloomberg commodity futures commodities trade exchanges trading sessions price
markets usatoday custom usatoday commodities commodities	business	markets usatoday custom usatoday commodities commodities
commerce commerce net industry consortium companies promoting building commerce solutions internet	business	commerce commerce net industry consortium companies promoting building commerce solutions internet
commercebank commerce bank serving missouri kansas illinois oklahoma bank holding company subsidiaries commercial banking operations insurance services credit card services mortgage banking	business	commercebank commerce bank serving missouri kansas illinois oklahoma bank holding company subsidiaries commercial banking operations insurance services credit card services mortgage banking
commerce city commerce website city city web city commerce california	business	commerce city commerce website city city web city commerce california
forbes commerce commerce news retail industry news forbes com retail news financial markets coverage personal finance advice tools investing tips forbes affiliated publications	business	forbes commerce commerce news retail industry news forbes retail news financial markets coverage personal finance advice tools investing tips forbes affiliated publications
energycommerce house gov house committee energy commerce welcome house committee energy commerce welcome	business	energycommerce house gov house committee energy commerce house committee energy commerce
sims berkeley edu resources infoecon commerce commerce legal policy framework global electronic commerce progress report association francaise pour commerce les echanges electroniques	business	sims berkeley resources infoecon commerce commerce legal policy framework global electronic commerce progress report association francaise pour commerce les echanges electroniques
commercega commerce community overview departments quarterly calendar economic development	business	commercega commerce community overview departments quarterly calendar economic development
commerce senate gov senate committee commerce science transportation committee jurisdiction coast guard coastal management communications highway safety waterways interstate commerce maritime commerce	business	commerce senate gov senate committee commerce science transportation committee jurisdiction coast guard coastal management communications highway safety waterways interstate commerce maritime commerce
state ohio department commerce division financial institutions sections banks consumer finance credit unions savings division securities	business	ohio department commerce division financial institutions sections banks consumer finance credit unions savings division securities
commercecasino commerce casino blackjack poker commerce downtown los angeles	business	commercecasino commerce casino blackjack poker commerce downtown los angeles
commerceinsurance commerce insurance company commerce insurance company massachusetts hampshire	business	commerceinsurance commerce insurance company commerce insurance company massachusetts hampshire
azcommerce arizona department commerce home page information functions services agency	business	azcommerce arizona department commerce functions services agency
state commerce welcome jersey commerce commerce commission board executive director commerce commission hold board meeting urban enterprise zone authority meeting scheduled	business	commerce jersey commerce commerce commission board executive director commerce commission hold board meeting urban enterprise zone authority meeting scheduled
wikipedia wiki commerce clause commerce clause wikipedia encyclopedia article section clause united constitution commerce clause reads congress power	business	wikipedia wiki commerce clause commerce clause wikipedia encyclopedia article clause united constitution commerce clause reads congress power
okcommerce gov oklahoma department commerce lead agency economic development mission stimulate creation expansion retention jobs growth investment	business	okcommerce gov oklahoma department commerce lead agency economic development mission stimulate creation expansion retention jobs growth investment
wikipedia wiki commerce commerce wikipedia encyclopedia commerce branch production deals exchange services producer consumer comprises trading	business	wikipedia wiki commerce commerce wikipedia encyclopedia commerce branch production deals exchange services producer consumer comprises trading
clla commercial law league america north america creditors rights organization designed resources attorneys collections professionals	business	clla commercial law league america north america creditors rights organization designed resources attorneys collections professionals
tamu commerce edu welcome texas university- commerce texas university- commerce university courses study academic departments	business	tamu commerce texas university commerce texas university commerce university courses study academic departments
commerce gov welcome department commerce washington —at press briefing white house secretary commerce carlos gutierrez secretary treasury hank paulson office	business	commerce gov department commerce washington press briefing white house secretary commerce carlos gutierrez secretary treasury hank paulson office
markets commodities commodities news market data com commodities market news financial market prices investor analysis com	business	markets commodities commodities news market data commodities market news financial market prices investor analysis
marketdata commodities com market data commodities download daily tabulations commodity prices click wish table	business	marketdata commodities market data commodities download daily tabulations commodity prices click table
tfc charts menu commodity futures charts futures quotes menu commodity charts intra quotes menu charts quotes courtesy tradingcharts com inc	business	tfc charts menu commodity futures charts futures quotes menu commodity charts intra quotes menu charts quotes courtesy tradingcharts
today reuters investing commodities commodities futures index energy metals grains oilseeds reuters com source commodities futures index energy futures metals futures grains futures oilseeds futures softs futures livestock	business	reuters investing commodities commodities futures energy metals grains oilseeds reuters source commodities futures energy futures metals futures grains futures oilseeds futures softs futures livestock
cftc gov commodity futures trading commission home page law rules information commodities futures trading	business	cftc gov commodity futures trading commission law rules commodities futures trading
futures tradingcharts commodity charts quotes commodity charts courtesy tfc commodity charts track commodities financial indicators information	business	futures tradingcharts commodity charts quotes commodity charts courtesy tfc commodity charts track commodities financial indicators
online wsj commodities crude nears record wsj com	business	online wsj commodities crude nears record wsj
cftc gov cftc cftchome commodity futures trading commission home page cftc independent agency government oversees futures markets protects market users	business	cftc gov cftc cftchome commodity futures trading commission cftc independent agency government oversees futures markets protects market users
fas usda gov commodities usda fas commodities products trade reports comprehensive commodity -by- commodity breakdown exports imports two- period	business	fas usda gov commodities usda fas commodities products trade reports comprehensive commodity commodity breakdown exports imports period
bloggingstocks category commodities posts commodities category bloggingstocks american people reliant precious commodity don anytime energy	business	bloggingstocks category commodities posts commodities category bloggingstocks american people reliant precious commodity don anytime energy
commodities thefinancials commodity library futures energy metals grains softs comprehensive online commodity resource featuring metals grains softs tropicals meat livestock price reports newsletters charts research	business	commodities thefinancials commodity library futures energy metals grains softs comprehensive online commodity resource featuring metals grains softs tropicals meat livestock price reports newsletters charts
biz yahoo topic commodities commodities news archive yahoo finance commodities news archive yahoo finance yahoo finance breaking news headlines articles companies economy markets	business	biz yahoo topic commodities commodities news archive yahoo finance commodities news archive yahoo finance yahoo finance breaking news headlines articles companies economy markets
commodities now commodities online focuses trends commodities market power energy precious metals agriculture	business	commodities commodities online focuses trends commodities market power energy precious metals agriculture
ndtvcommodities commodity online indian commodity market commodity futures indian commodity commodity india india commodity commodity futures commodity news commodity market commodity futures gold futures commodity india news	business	ndtvcommodities commodity online indian commodity market commodity futures indian commodity commodity india india commodity commodity futures commodity news commodity market commodity futures gold futures commodity india news
marxists archive marx works economic manuscripts capital vol chapter section factors commodity use-value value money-form section fetishism commodities secret thereof	business	marxists archive marx economic manuscripts capital chapter factors commodity money form fetishism commodities secret
commerceonline commerce bank online welcome commerce bank america bank	business	commerceonline commerce bank online commerce bank america bank
llrx features labor features labor employment law resources internet labor employment law resources internet dahn article labor law resources	business	llrx features labor features labor employment law resources internet labor employment law resources internet dahn article labor law resources
cisgw law pace edu electronic library international commercial law cisg database resources united nations convention contracts international sale international commercial law	business	cisgw law pace electronic library international commercial law cisg database resources united nations convention contracts international sale international commercial law
findlaw topics commercial index findlaw legal subjects commercial law findlaw newsletters findlaw classifieds commercial law job findlaw library commercial law documents briefs articles books	business	findlaw topics commercial findlaw legal subjects commercial law findlaw newsletters findlaw classifieds commercial law job findlaw library commercial law documents briefs articles books
petris solutions businessoperations business operations petris solutions optimize operations access preservation data underpins business	business	petris solutions businessoperations business operations petris solutions optimize operations access preservation data underpins business
symvionics services moss business ops symvionics inc moss business operations improvement management business operations organizational grounds maintenance training delivery development business operations improvement	business	symvionics services moss business ops symvionics moss business operations improvement management business operations organizational grounds maintenance training delivery development business operations improvement
online onetcenter link summary summary report business operations specialists business operations specialists listed titles occupations	business	online onetcenter link summary summary report business operations specialists business operations specialists listed titles occupations
aao aaoesite business index business operations finance competency home page american comprehensive competency tools manage financial sound practice topics benchmarking management	business	aao aaoesite business business operations finance competency american comprehensive competency tools manage financial sound practice topics benchmarking management
broadcast harris nab business operations corporation nab business operations streamline business operations strengthen interface departments systems automated business solutions	business	broadcast harris nab business operations corporation nab business operations streamline business operations strengthen interface departments systems automated business solutions
allbusiness operations business operations advice information allbusiness com operations running smoothly protect company business insurance disaster preparedness strategy	business	allbusiness operations business operations advice allbusiness operations running smoothly protect company business insurance disaster preparedness strategy
dol gov oasam programs boc department labor oasam boc home page business operations center photos boc workforce digital image business operations center quality	business	dol gov oasam programs boc department labor oasam boc business operations center photos boc workforce digital image business operations center quality
fed pages business ops usda forest service national headquarters enjoying national forests fire information web contact welcome business operations washington	business	fed business ops usda forest service national headquarters enjoying national forests fire web contact business operations washington
fita import export business international trade leads fita global import export business international trade leads fita global trade leads	business	fita import export business international trade leads fita global import export business international trade leads fita global trade leads
fita webindex international trade links resources import- export fita org international trade leads world trade export import fita org global trade portal	business	fita webindex international trade links resources import export fita org international trade leads trade export import fita org global trade portal
tradezone import export trade leads global trade business opportunity mellinger import export business opportunity global trade leads services suppliers manufactures directory importers exporters	business	tradezone import export trade leads global trade business opportunity mellinger import export business opportunity global trade leads services suppliers manufactures directory importers exporters
tradezone busops import export business opportunities suppliers business opportunity mellinger import export business opportunities guidance running import export business opportunity	business	tradezone busops import export business opportunities suppliers business opportunity mellinger import export business opportunities guidance running import export business opportunity
trade indiamart trade leads international trade leads import export trade leads trade leads international trade lead import export trade leads business trade global buy sell international trade zone sell	business	trade indiamart trade leads international trade leads import export trade leads trade leads international trade lead import export trade leads business trade global buy sell international trade zone sell
swissinfo import export bulletin board international trade leads import- export buy sell business opportunities	business	swissinfo import export bulletin board international trade leads import export buy sell business opportunities
bls gov soc soc business financial operations occupations business operations specialists agents business managers artists performers athletes agents business managers	business	bls gov soc soc business financial operations occupations business operations specialists agents business managers artists performers athletes agents business managers
forbes mckinsey offshoring forbes com business -process offshoring nascent industry cost offshore operations reorganize reengineer	business	forbes mckinsey offshoring forbes business process offshoring nascent industry cost offshore operations reorganize reengineer
gov business business operations home page business development jim forth human resources shearon drakeford parking services	business	gov business business operations business development jim human resources shearon drakeford parking services
edu ndbusop business operations university notre dame university notre dame independent national catholic university notre dame indiana adjacent city south bend	business	ndbusop business operations university notre dame university notre dame independent national catholic university notre dame indiana adjacent city south bend
hispanic services hispanic labor resource llc english hispanic labor resource llc calendar events testimony recomendations hispanic labor resource llc english edit website	business	hispanic services hispanic labor resource llc english hispanic labor resource llc calendar events testimony recomendations hispanic labor resource llc english edit website
pbdj sys con read appeon migrates healthcare labor resource management software appeon corporation helped res-q healthcare systems migrate key modules labor resource management system sybase	business	pbdj sys con read appeon migrates healthcare labor resource management software appeon corporation helped res healthcare systems migrate key modules labor resource management system sybase
aft topics international child labor resources aft hot topics international affairs department child labor child labor resources print child labor coalition web information child labor united world	business	aft topics international child labor resources aft hot topics international affairs department child labor child labor resources print child labor coalition web child labor united
latpro jobs sales ops labor resource region somerset jersey hispanic bilingual jobs pepsico world leader foods beverages revenues bil	business	latpro jobs sales ops labor resource region somerset jersey hispanic bilingual jobs pepsico leader foods beverages revenues bil
mtmanufacturingcenter services processimprovement labor resource planning labor resource planning montana manufacturing center labor resource planning labor schedule manner	business	mtmanufacturingcenter services processimprovement labor resource planning labor resource planning montana manufacturing center labor resource planning labor schedule manner
oblink oblink preterm labor resource congress reporting physician resource news information resources preterm labor ferring pharmaceuticals tractocile	business	oblink oblink preterm labor resource congress reporting physician resource news resources preterm labor ferring pharmaceuticals tractocile
wistechnology article api labor resource management impacts hospital employees wtn api software inc announced winchester hospital winchester mass plans implement majority api suite labor resource management	business	wistechnology article api labor resource management impacts hospital employees wtn api software announced winchester hospital winchester mass plans implement majority api suite labor resource management
wikipedia wiki business operations business operations wikipedia encyclopedia business operations activities running business value stakeholders	business	wikipedia wiki business operations business operations wikipedia encyclopedia business operations activities running business stakeholders
smallbusiness findlaw business operations business operations access topics business operations section links navigation bar page	business	smallbusiness findlaw business operations business operations access topics business operations links navigation bar
money howstuffworks operations howstuffworks operations aren happy customers business analyzing managing business operations	business	money howstuffworks operations howstuffworks operations happy customers business analyzing managing business operations
busops osu edu office business operations ohio university scarlet gray sustainability initiatives office business operations hosted meetings faculty	business	busops osu office business operations ohio university scarlet gray sustainability initiatives office business operations hosted meetings faculty
business thingamajob browse jobs professional business operations jobs thingamajob com view apply professional business operations jobs thingamajob com	business	business thingamajob browse jobs professional business operations jobs thingamajob view apply professional business operations jobs thingamajob
business directory management operations management business operations vendors operations management business com business operations consultants providers operations management software solutions managing operations company	business	business directory management operations management business operations vendors operations management business business operations consultants providers operations management software solutions managing operations company
sycoleman sycoleman strategic communication public outreach strategic sycoleman business operations street south suite arlington virginia	business	sycoleman sycoleman strategic communication public outreach strategic sycoleman business operations street south suite arlington virginia
virginia edu businessoperations university virginia business operations business operations units university virginia quality services prices students faculty staff guests	business	virginia businessoperations university virginia business operations business operations units university virginia quality services prices students faculty staff guests
tse export gov tradestats express™ national trade data export data help annual quarterly trade data tradestats express	business	tse export gov tradestats national trade data export data annual quarterly trade data tradestats express
export sales export trade america export management international sales export trade america professional export management firm established managing export sales marketing issues	business	export sales export trade america export management international sales export trade america professional export management firm established managing export sales marketing issues
austrade gov austrade australian trade commission helping australians australian trade commission austrade australian government agency helps export update newsletter export news events	business	austrade gov austrade australian trade commission helping australians australian trade commission austrade australian government agency helps export update newsletter export news events
exporttradebrokers export trade brokers interexchange trading firm export trading firm specializing export brokerage export management international business consulting	business	exporttradebrokers export trade brokers interexchange trading firm export trading firm specializing export brokerage export management international business consulting
entrepreneur advertising index advertising info budget understanding mediums ads mail pieces	business	entrepreneur advertising advertising info budget understanding mediums ads mail pieces
advertising lycos contactus lycos advertise lycos advertising opportunities lycos network pay-per-click advertising lycos users sponsored listings	business	advertising lycos contactus lycos advertise lycos advertising opportunities lycos network pay click advertising lycos users sponsored listings
military aboutus twocolumn business opportunities business-opportunities military military affinity marketing services advertising sponsorships consumer research	business	military aboutus twocolumn business opportunities business opportunities military military affinity marketing services advertising sponsorships consumer
edweek info advertise advertising opportunities advertising opportunities display advertising sponsorships features plus sponsorships opt-in e-newsletters	business	edweek info advertise advertising opportunities advertising opportunities display advertising sponsorships features sponsorships opt newsletters
clicksor online contextual advertising behavioral marketing advertising network content targeted advertising service cpc ppc	business	clicksor online contextual advertising behavioral marketing advertising network content targeted advertising service cpc ppc
advertising nature home advertising npg welcome advertising npg interactive resource information print online advertising nature publishing family journals	business	advertising nature advertising npg advertising npg interactive resource print online advertising nature publishing family journals
advertising utexas edu world texas advertising university texas austin texas advertising university texas austin submit url advertising world center interactive advertising updated	business	advertising utexas texas advertising university texas austin texas advertising university texas austin submit url advertising center interactive advertising updated
dallasnews advertising advertising dallas morning news news dallas texas information advertising dallas morning news newspaper click contact classified retail advertising	business	dallasnews advertising advertising dallas morning news news dallas texas advertising dallas morning news newspaper click contact classified retail advertising
bartleby advertising advertising learn advertising programs sponsorship opportunities bartleby com contact	business	bartleby advertising advertising learn advertising programs sponsorship opportunities bartleby contact
canada aboutus advertising canada com advertising canwest publications contact information canwestsales television sales click canada com network	business	canada aboutus advertising canada advertising canwest publications contact canwestsales television sales click canada network
nanotechweb advertising advertising information nanotechweb org advertising message delivered nanotechnology industry professionals subscribe weekly news alert	business	nanotechweb advertising advertising nanotechweb org advertising message delivered nanotechnology industry professionals subscribe weekly news alert
law cornell edu wex index commercial law commercial law wex commercial law governs business commerce consumer transactions law developed commercial fields	business	law cornell wex commercial law commercial law wex commercial law governs business commerce consumer transactions law developed commercial fields
law cornell edu uniform ucc lii ucc locator maryland article commercial law maryland article commercial law	business	law cornell uniform ucc lii ucc locator maryland article commercial law maryland article commercial law
wikipedia wiki commercial law commercial law wikipedia encyclopedia commercial law business law body law governs business commerce branch civil law	business	wikipedia wiki commercial law commercial law wikipedia encyclopedia commercial law business law body law governs business commerce branch civil law
commerc commercial contract law commercial contract law section focuses commercial transactions business entities	business	commerc commercial contract law commercial contract law focuses commercial transactions business entities
advertising mainetoday mainetoday com online media kit kit advertise mainetoday com advertising products audience content service contact advertisers advertise mainetoday com	business	advertising mainetoday mainetoday online media kit kit advertise mainetoday advertising products audience content service contact advertisers advertise mainetoday
jurist law pitt edu commercial law commercial law guide jurist legal education network	business	jurist law pitt commercial law commercial law guide jurist legal education network
advertising wsj wsj advertising wall street journal advertising wall street journal honored pulitzer prizes public service international reporting	business	advertising wsj wsj advertising wall street journal advertising wall street journal honored pulitzer prizes public service international reporting
businessweek advertising business online advertising advertising information companies directories mba industrial design e-learning directories	business	businessweek advertising business online advertising advertising companies directories mba industrial design learning directories
jetc import export trade leads directory percent import export trade leads buyers leads post trade leads cost international import export source trade leads	business	jetc import export trade leads directory percent import export trade leads buyers leads post trade leads cost international import export source trade leads
export forum africa asia import export trade forum business import export opportunities america asia pacific europe english french	business	export forum africa asia import export trade forum business import export opportunities america asia pacific europe english french
export gov export gov helps businesses participate global marketplace information trade events tariffs export counseling assistance	business	export gov export gov helps businesses participate global marketplace trade events tariffs export counseling assistance
sba gov oit business administration temp programoffice style breaking trade game business guide exporting export gov export legal assistance network elan african growth opportunity	business	sba gov oit business administration temp programoffice style breaking trade game business guide exporting export gov export legal assistance network elan african growth opportunity
sasktrade saskatchewan trade export partnership step step non-profit membership-based organization designed promote growth saskatchewan export industry assist provincial businesses	business	sasktrade saskatchewan trade export partnership step step profit membership based organization designed promote growth saskatchewan export industry assist provincial businesses
eceurope eceurope international trade leads import export marketplace eceurope network international government import export trade leads marketplace directory world	business	eceurope eceurope international trade leads import export marketplace eceurope network international government import export trade leads marketplace directory
tefo california trade export finance online tefo tefo international trade finance service provider trade finance market mid-sized enterprise sme companies	business	tefo california trade export finance online tefo tefo international trade finance service provider trade finance market mid sized enterprise sme companies
exim indiamart export import trade india trade policy india export import trade indian exim portal guide export import trade india exim guidelines indian exim policies foreign trade regulations export import procedures	business	exim indiamart export import trade india trade policy india export import trade indian exim portal guide export import trade india exim guidelines indian exim policies foreign trade regulations export import procedures
foreign trade import export resources foreign trade online premier web portal foreign trade importers exporters manufacturers freight forwarders directories trade leads statistics	business	foreign trade import export resources foreign trade online premier web portal foreign trade importers exporters manufacturers freight forwarders directories trade leads statistics
tradeleadscenter directory export import international trade leads post trade leads directory export import international trade leads help business partners	business	tradeleadscenter directory export import international trade leads post trade leads directory export import international trade leads business partners
advertising advertising com quarterly online advertising reports examine consumer rates correlate variables	business	advertising advertising quarterly online advertising reports examine consumer rates correlate variables
wikipedia wiki advertising advertising wikipedia encyclopedia advertising paid one-way communication medium sponsor message controlled variations publicity	business	wikipedia wiki advertising advertising wikipedia encyclopedia advertising paid communication medium sponsor message controlled variations publicity
bidvertiser bidvertiser pay click advertising sites pay click advertising online advertising sites internet marketing solution online advertisers	business	bidvertiser bidvertiser pay click advertising sites pay click advertising online advertising sites internet marketing solution online advertisers
adage advertising age definitive collection news analysis regarding goings-on world advertising	business	adage advertising age definitive collection news analysis goings advertising
advertising about advertising resource advertising weekly feature articles in-depth coverage advertising mediums industry	business	advertising advertising resource advertising weekly feature articles depth coverage advertising mediums industry
google ads google advertising buy advertising google search engine sites adsense program tour faq	business	google ads google advertising buy advertising google search engine sites adsense program tour faq
epinet economic policy institute mission epi inform empower people solutions ensure shared prosperity opportunity	business	epinet economic policy institute mission epi inform empower people solutions ensure shared prosperity opportunity
wikipedia wiki economic policy economic policy wikipedia encyclopedia economic policy actions governments economic field covers systems setting rates government deficit	business	wikipedia wiki economic policy economic policy wikipedia encyclopedia economic policy actions governments economic field covers systems setting rates government deficit
cepr center economic policy research nonprofit nonpartisan research center promote democratic debate economic social issues	business	cepr center economic policy nonprofit nonpartisan center promote democratic debate economic social issues
finance yahoo yahoo finance india yahoo india leading financial portal live nse quotes tickers charts personal finance investing mutual funds news tax	business	finance yahoo yahoo finance india yahoo india leading financial portal live nse quotes tickers charts personal finance investing mutual funds news tax
military finance finance military com home loan pay rates buying car military com finance center helps grasp	business	military finance finance military loan pay rates buying car military finance center helps grasp
ucc com universal currency converter currency tool foreign exchange rate calculations internet up-to-the-minute currency rates	business	ucc universal currency converter currency tool foreign exchange rate calculations internet minute currency rates
com world favorite currency foreign exchange universal currency converter historical rate tables grown world currency foreign exchange	business	favorite currency foreign exchange universal currency converter historical rate tables grown currency foreign exchange
rates exchange rates currency exchange rates plotted charts conversion tables calculator historic lookups	business	rates exchange rates currency exchange rates plotted charts conversion tables calculator historic lookups
rates calculator currency calculator currency exchange rates calculator convert currecy	business	rates calculator currency calculator currency exchange rates calculator convert currecy
fool fool com stock market advice stock investing advice personal finance magic retirement magic personal finance ride roth riches ride roth riches	business	fool fool stock market advice stock investing advice personal finance magic retirement magic personal finance ride roth riches ride roth riches
exchangerate exchangerate com exchange rate currencies graphs exchange rate foreign currency historical data graphs updated daily	business	exchangerate exchangerate exchange rate currencies graphs exchange rate foreign currency historical data graphs updated daily
oanda oanda currency foreign exchange services trading oanda com currency currency foreign exchange rates investors travelers online businesses	business	oanda oanda currency foreign exchange services trading oanda currency currency foreign exchange rates investors travelers online businesses
finance yahoo currency currency converter yahoo finance view exchange rates currencies convert currencies countries	business	finance yahoo currency currency converter yahoo finance view exchange rates currencies convert currencies countries
wikipedia wiki exchange rate exchange rate wikipedia encyclopedia finance exchange rate foreign- exchange rate forex rate rate currencies currency	business	wikipedia wiki exchange rate exchange rate wikipedia encyclopedia finance exchange rate foreign exchange rate forex rate rate currencies currency
money cnn data currencies currencies currency converter rates cnnmoney com view exchange rates currencies convert currencies hottest jobs annie unemployment rate cost living calculator job	business	money cnn data currencies currencies currency converter rates cnnmoney view exchange rates currencies convert currencies hottest jobs annie unemployment rate cost living calculator job
coinmill currency exchange rate conversion calculator convert money currencies exchange rates	business	coinmill currency exchange rate conversion calculator convert money currencies exchange rates
independenttraveler resources article aid category exchange rate planning vacation foreign destination financial burden value dollar loosing strength	business	independenttraveler resources article aid category exchange rate planning vacation foreign destination financial burden dollar loosing strength
oanda convert classic currency converter currencies don forget oanda travelers cheatsheet wallet-sized exchange rate reference compare currency	business	oanda convert classic currency converter currencies don forget oanda travelers cheatsheet wallet sized exchange rate reference compare currency
money cnn business financial personal finance news cnnmoney practical personal finance advice calculators investing tips business news stock quotes financial market coverage editors	business	money cnn business financial personal finance news cnnmoney practical personal finance advice calculators investing tips business news stock quotes financial market coverage editors
ipl div subject browse bus internet public library finance magportal com magazine articles finance investment wachowicz web world web sites discerning finance students	business	ipl div subject browse bus internet public library finance magportal magazine articles finance investment wachowicz web web sites discerning finance students
dof gov department finance information budget demographics monthly financial bulletins links	business	dof gov department finance budget demographics monthly financial bulletins links
womensorganizations pages ncwo global women issues task force global trade trade americas ftaa legally-binding trade agreement liberalize trade region	business	womensorganizations ncwo global women issues task force global trade trade americas ftaa legally binding trade agreement liberalize trade region
finance google google finance google finance information stocks mutual funds public companies google finance interactive	business	finance google google finance google finance stocks mutual funds public companies google finance interactive
finance yahoo yahoo finance stock quotes market news mortgage rates yahoo finance stock quotes news portfolio management resources international market data message boards mortgage rates	business	finance yahoo yahoo finance stock quotes market news mortgage rates yahoo finance stock quotes news portfolio management resources international market data message boards mortgage rates
senate gov finance finance senate committee charged writing tax legislation bills affecting social security medicare entitlement programs	business	senate gov finance finance senate committee charged writing tax legislation bills social security medicare entitlement programs
dir yahoo business and economy finance and investment finance investment yahoo directory sites companies dedicated finance investment tips strategies analyses resources yahoo finance motley fool msn money	business	dir yahoo business economy finance investment finance investment yahoo directory sites companies dedicated finance investment tips strategies analyses resources yahoo finance motley fool msn money
fisher osu edu fin overview osu virtual finance library	business	fisher osu fin overview osu virtual finance library
wikipedia wiki finance finance wikipedia encyclopedia finance field studies addresses businesses organizations monetary resources	business	wikipedia wiki finance finance wikipedia encyclopedia finance field studies addresses businesses organizations monetary resources
finance yahoo yahoo finance ftse stock exchange mortgages loans yahoo finance compare financial services personal financial advice home investment news london stock exchange data	business	finance yahoo yahoo finance ftse stock exchange mortgages loans yahoo finance compare financial services personal financial advice investment news london stock exchange data
forbes entrepreneurs finance finance funding news information entrepreneurs entrepreneurs- finance advice information funding business forbes com	business	forbes entrepreneurs finance finance funding news entrepreneurs entrepreneurs finance advice funding business forbes
careers finance careers finance careerselector com information key careers business investment banking consulting marketing	business	careers finance careers finance careerselector key careers business investment banking consulting marketing
google top business financial services google directory business financial services information scams scandals banking finance business finance coverage east north africa	business	google top business financial services google directory business financial services scams scandals banking finance business finance coverage east north africa
finance army mil army finance school corps homepage course enrollment class schedules contact	business	finance army mil army finance school corps homepage enrollment class schedules contact
branchorientation finance finance corps flash plugin view animation welcome finance corps website branch orientation home	business	branchorientation finance finance corps flash plugin view animation finance corps website branch orientation
finance sympatico msn finance personal finance business market news sympatico finance sympatico msn finance prime internet destination personal finance investing business news	business	finance sympatico msn finance personal finance business market news sympatico finance sympatico msn finance prime internet destination personal finance investing business news
content monster getthejob industry home monster finance interview resume salary job advice job effective resume writing interview skills salary negotiation monster getting job	business	content monster getthejob industry monster finance interview resume salary job advice job effective resume writing interview skills salary negotiation monster job
imf external fin data param rms mth exchange rate archives month rates currency representative exchange rate reported issuing central bank sdr value dollar	business	imf external fin data param rms mth exchange rate archives month rates currency representative exchange rate reported issuing central bank sdr dollar
hmit exchangerates exchange rate net country exchange rate country currency united dollar	business	hmit exchangerates exchange rate net country exchange rate country currency united dollar
finance yahoo currency converter currency converter currency convertor currencies yahoo delay mins london stock exchange delay exchanges dividends financial information thomson	business	finance yahoo currency converter currency converter currency convertor currencies yahoo delay mins london stock exchange delay exchanges dividends financial thomson
bankofcanada exchform -year currency converter exchange rates rates statistics daily digest exchange rates monthly rates -year lookup monthly annual rates exchange rate lookup	business	bankofcanada exchform currency converter exchange rates rates statistics daily digest exchange rates monthly rates lookup monthly annual rates exchange rate lookup
dos state corp buscorp nys dos corporations business corporation filings business corporation filing certificate incorporation pursuant section business corporation law	business	dos corp buscorp nys dos corporations business corporation filings business corporation filing certificate incorporation pursuant business corporation law
saskjustice gov corporations formingcorp shtml forming corporation business corporations act business corporations act kit copy incorporate phone corporations branch	business	saskjustice gov corporations formingcorp shtml forming corporation business corporations business corporations kit copy incorporate phone corporations branch
qian biz home qian business corporation mission organized qian business corporation toronto-based consulting company specializing promotion trade investment	business	qian biz qian business corporation mission organized qian business corporation toronto based consulting company specializing promotion trade investment
state code title utah code title chapter utah revised business utah code title chapter utah revised business corporation act code html format links zipped wordperfect	business	code title utah code title chapter utah revised business utah code title chapter utah revised business corporation code html format links zipped wordperfect
saic science applications international corporation saic information technology systems integration business solutions employee-owned careers business description news	business	saic science applications international corporation saic technology systems integration business solutions employee owned careers business description news
company monster employment search job employment opportunities company search employment opportunities company instantly submit resume online	business	company monster employment search job employment opportunities company search employment opportunities company instantly submit resume online
employmentspot categories bycompany search jobs company employment spot explore resources job company	business	employmentspot categories bycompany search jobs company employment spot explore resources job company
southerncompany careerinfo home careers southern company southern company producers electricity united operating -square-mile service territory spanning	business	southerncompany careerinfo careers southern company southern company producers electricity united operating square mile service territory spanning
mycareer ford corporate website ford motor company corporate website ford motor company company career programs hire learn employment ford motor company click	business	mycareer ford corporate website ford motor company corporate website ford motor company company career programs hire learn employment ford motor company click
corporate disney careers index walt disney company careers bottom line imagination culture magic wonder experience childhood dreams	business	corporate disney careers walt disney company careers bottom imagination culture magic experience childhood dreams
ptc company employment index ptc careers ptc committed employment opportunities employees applicants employment ptc employment decisions	business	ptc company employment ptc careers ptc committed employment opportunities employees applicants employment ptc employment decisions
brinkscompany corporateinformation employment brink company employment employment brink company diversified fortune company business units world-wide quality products service	business	brinkscompany corporateinformation employment brink company employment employment brink company diversified fortune company business units wide quality products service
digital universities library nsf job opportunities employment company national instruments learn build career national instruments	business	digital universities library nsf job opportunities employment company national instruments learn build career national instruments
mta info busco jobs mta bus company employment bus company employment mta bus company environment career advancement comprehensive benefits	business	mta info busco jobs mta bus company employment bus company employment mta bus company environment career advancement comprehensive benefits
sco company jobs sco inc company sco employment company employment company graphics company history company profile directions salt lake city employment opportunities events analyst	business	sco company jobs sco company sco employment company employment company graphics company history company profile directions salt lake city employment opportunities events analyst
mabco modern arabian business corp sole agent toshiba copiers west bank authurized dealer oki faxes	business	mabco modern arabian business corp sole agent toshiba copiers west bank authurized dealer oki faxes
gtreview global trade review probusinessbank russia rosemount global trade finance fund -month trade -related club loan financing	business	gtreview global trade review probusinessbank russia rosemount global trade finance fund month trade club loan financing
sbgfc welcome business corporation business corporation honors outstanding bank partners occasion bank excellence awards dusit hotel nikko makati city	business	sbgfc business corporation business corporation honors outstanding bank partners occasion bank excellence awards dusit hotel nikko makati city
sos state corp forms shtml index promulgated corporations section dissolution articles dissolution business corporation issued shares commenced business rev	business	sos corp forms shtml promulgated corporations dissolution articles dissolution business corporation issued shares commenced business rev
sauder ubc pacific exchange rate service pacific exchange rate service exchange rates database historic exchange rates canadian dollar services exchange rate economics daily updated	business	sauder ubc pacific exchange rate service pacific exchange rate service exchange rates database historic exchange rates canadian dollar services exchange rate economics daily updated
cocori general information xchng costa rica colon exchange rate cocori costa rica information costa rican currency colon exchange rate dollar	business	cocori xchng costa rica colon exchange rate cocori costa rica costa rican currency colon exchange rate dollar
bank china common service bank china boc exchange rate currency buying rate cash buying rate selling rate rate gbp	business	bank china common service bank china boc exchange rate currency buying rate cash buying rate selling rate rate gbp
bot bothomepage databank finmarkets exchangerate exchange foreign exchange rates monetary exchange rate policies financial institutions supervision payment systems bank bond debt instruments	business	bot bothomepage databank finmarkets exchangerate exchange foreign exchange rates monetary exchange rate policies financial institutions supervision payment systems bank bond debt instruments
wikipedia wiki corporation corporation wikipedia encyclopedia modern business corporation dominant corporation legal personality modern business corporation	business	wikipedia wiki corporation corporation wikipedia encyclopedia modern business corporation dominant corporation legal personality modern business corporation
tlo tlc state statutes butoc business corporation act business corporation act expires article act section chapter acts	business	tlo tlc statutes butoc business corporation business corporation expires article chapter acts
myownbusiness business organization sole proprietorship partnership business organization business proprietorship partnership corporation liability company	business	myownbusiness business organization sole proprietorship partnership business organization business proprietorship partnership corporation liability company
swbc swbc southwest business corporation san antonio business insurance employee benefits employee mortgage financial services retirement planning families	business	swbc swbc southwest business corporation san antonio business insurance employee benefits employee mortgage financial services retirement planning families
sbinformation about ownership scorporation business corporation corporation advantageous business learn pros cons corporation	business	sbinformation ownership scorporation business corporation corporation advantageous business learn pros cons corporation
dos state corp busfile nys dos division corporations records ucc business biennial statement information filing biennial statement section business corporation law	business	dos corp busfile nys dos division corporations records ucc business biennial statement filing biennial statement business corporation law
irs gov pub irs rev election corporation status event corporation business request approved	business	irs gov pub irs rev election corporation status event corporation business request approved
assembly state leg business corporation	business	assembly leg business corporation
secretary state corporations north carolina secretary corporations search	business	secretary corporations north carolina secretary corporations search
abanet buslaw library onlinepublications mbca model business corporation act edition text revised aba model business corporation act annotated business corporation incorporated	business	abanet buslaw library onlinepublications mbca model business corporation edition text revised aba model business corporation annotated business corporation incorporated
sos state corp index shtml corporations section corporations section files documents affect business organizations non-profit corporations statutes	business	sos corp shtml corporations corporations files documents affect business organizations profit corporations statutes
careers netscape story starting own business corporation information business corporation information business corporation information careers jobs yea business company wired web inc	business	careers netscape story starting business corporation business corporation business corporation careers jobs yea business company wired web
simplot company simplot company employment overview simplot company website home page	business	simplot company simplot company employment overview simplot company website
aimglobal global trade assocation automatic identification global trade association automatic identification data capture aidc industry manufacturers consultants system integrators	business	aimglobal global trade assocation automatic identification global trade association automatic identification data capture aidc industry manufacturers consultants system integrators
netglobaltrade trade leads import export wholesale netglobaltrade com trade lead posting trade post leads photo	business	netglobaltrade trade leads import export wholesale netglobaltrade trade lead posting trade post leads photo
incometaxindia gov publications compute your salary income income from salary directorate income tax rsp delhi salary paid services rendered india regarded income india deductions salary income	business	incometaxindia gov publications compute salary income income salary directorate income tax rsp delhi salary paid services rendered india regarded income india deductions salary income
incometaxdelhi nic faqot salary income salary questions yes pension treated salary income tax act taxable head income salary module pension	business	incometaxdelhi nic faqot salary income salary questions pension treated salary income tax taxable head income salary module pension
onlinebangalore fina tax taxplaning tax planning salary section income tax act wages annuity pension gratuity fees commission perquisites profit	business	onlinebangalore fina tax taxplaning tax planning salary income tax wages annuity pension gratuity fees commission perquisites profit
nspe career sal comprehensive information engineering salaries engineering income salary survey continuously updated online database grants access nation interactive survey	business	nspe career sal comprehensive engineering salaries engineering income salary survey continuously updated online database grants access nation interactive survey
epinet content webfeatures snapshots archive wage salary income share growth recession wage salary income emphasized growth recession	business	epinet content webfeatures snapshots archive wage salary income share growth recession wage salary income emphasized growth recession
surfindia finance income tax salary income tax indian salary income tax salary income tax india income tax indian salary income tax salary income tax india income tax salary india salary income tax calculator india indian heads salary income	business	surfindia finance income tax salary income tax indian salary income tax salary income tax india income tax indian salary income tax salary income tax india income tax salary india salary income tax calculator india indian heads salary income
salary salary com personal homepage jobs salary figure jobs income jobs income jobs income jobs entry level jobs surveys research	business	salary salary personal homepage jobs salary figure jobs income jobs income jobs income jobs entry level jobs surveys
cbo gov ftpdoc index wage salary income tax bases box wage salary income subject federal income tax revenue service statistics income salary wages	business	cbo gov ftpdoc wage salary income tax bases box wage salary income subject federal income tax revenue service statistics income salary wages
legalserviceindia income tax tax salary tax india salary earner salary income taxed calculated section income tax act salary	business	legalserviceindia income tax tax salary tax india salary earner salary income taxed calculated income tax salary
swz salary salarywizard layouthtmls swzl salaryrangenarrow income jobs experienced professional jobs professional income jobs experienced professionals jobs professional salary rate income class salary pay scale	business	swz salary salarywizard layouthtmls swzl salaryrangenarrow income jobs experienced professional jobs professional income jobs experienced professionals jobs professional salary rate income class salary pay scale
nspe career sal engineering income salary survey discover answers questions engineering income salary survey access real-time engineering	business	nspe career sal engineering income salary survey discover answers questions engineering income salary survey access real time engineering
taxes yahoo primer salary yahoo india tax centre section income tax act salary income salary remuneration paid	business	taxes yahoo primer salary yahoo india tax centre income tax salary income salary remuneration paid
https asce bookstore book book engineering income salary survey published engineering income salary survey publishing version	business	https asce bookstore book book engineering income salary survey published engineering income salary survey publishing version
https asce bookstore book book engineering income salary survey engineering income salary survey isbn isbn stock mem pages spiral-bound	business	https asce bookstore book book engineering income salary survey engineering income salary survey isbn isbn stock mem spiral bound
incometaxindia gov fileyourreturn salary income tax india income -tax act stipulated salary salary income exceeding lacs upto lacs	business	incometaxindia gov fileyourreturn salary income tax india income tax stipulated salary salary income exceeding lacs upto lacs
finance locateindia income from salary income salary indian salary income income tax india indian india income salary indian salary income income tax india indian income tax rules incometax guide india income tax laws india	business	finance locateindia income salary income salary indian salary income income tax india indian india income salary indian salary income income tax india indian income tax rules incometax guide india income tax laws india
swz salary salarywizard layouthtmls swzl salaryrangenarrow income salary jobs career salary director job income salary jobs director salary job manager supervisor job career salary manager supervisor executive director	business	swz salary salarywizard layouthtmls swzl salaryrangenarrow income salary jobs career salary director job income salary jobs director salary job manager supervisor job career salary manager supervisor executive director
sccaenterprises scca enterprises wheel excitement focused driver skill cost containment central enterprises formula scca race cars power mazda	business	sccaenterprises scca enterprises wheel excitement focused driver skill cost containment central enterprises formula scca race cars power mazda
springboardenterprises springboard enterprises home programs educate showcase women entrepreneurs equity capital grow companies	business	springboardenterprises springboard enterprises programs educate showcase women entrepreneurs equity capital grow companies
werner werner enterprises carrier commodities omaha equipment van flatbeds temperature controlled dedicated fleets	business	werner werner enterprises carrier commodities omaha equipment van flatbeds temperature controlled dedicated fleets
lee lee enterprises inc publishing newspapers online shoppers corporate web lee enterprises davenport iowa newspapers shoppers specialty publications printing websites online services	business	lee lee enterprises publishing newspapers online shoppers corporate web lee enterprises davenport iowa newspapers shoppers specialty publications printing websites online services
ironcrown iron crown enterprises iron crown enterprises homepage online store ice news downloads fan fiction art ice online forums	business	ironcrown iron crown enterprises iron crown enterprises homepage online store ice news downloads fan fiction art ice online forums
wbenc women business enterprise national council women business enterprise national council nation leading advocate women business enterprises suppliers corporate america	business	wbenc women business enterprise national council women business enterprise national council nation leading advocate women business enterprises suppliers corporate america
historicenterprises historic enterprises reenactment costuming armor accessories varieties camping gear toiletries	business	historicenterprises historic enterprises reenactment costuming armor accessories varieties camping gear toiletries
currieenterprises currie enterprises rear jeep ford inch currie enterprises rear axles inch components bumpers jeep jeeps rocker	business	currieenterprises currie enterprises rear jeep ford inch currie enterprises rear axles inch components bumpers jeep jeeps rocker
wikipedia wiki social enterprise social enterprise wikipedia encyclopedia social enterprises social mission driven organizations trade services social deliver financial	business	wikipedia wiki social enterprise social enterprise wikipedia encyclopedia social enterprises social mission driven organizations trade services social deliver financial
kiwisyslog kiwi enterprises home freeware syslog daemon windows licensed version logs displays archives e-mails syslog messages routers	business	kiwisyslog kiwi enterprises freeware syslog daemon windows licensed version logs displays archives mails syslog messages routers
anarchyent anarchy enterprises play online games game downloads games game downloads strategy puzzle games anarchy enterprises	business	anarchyent anarchy enterprises play online games game downloads games game downloads strategy puzzle games anarchy enterprises
mcwhortle mcwhortle enterprises inc valuable pre-ipo investment opportunity help invest wisely	business	mcwhortle mcwhortle enterprises valuable pre ipo investment opportunity invest wisely
strongparachutes enterprises manufactures quasar containers stellar canopies product information printable	business	strongparachutes enterprises manufactures quasar containers stellar canopies product printable
ceimaine coastal enterprises home non-profit community development corporation founded social economic opportunities people businesses communities maine	business	ceimaine coastal enterprises profit community development corporation founded social economic opportunities people businesses communities maine
tolkien ent tolkien enterprises tolkien enterprises division saul zaentz company acquired rights fanciful characters	business	tolkien ent tolkien enterprises tolkien enterprises division saul zaentz company acquired rights fanciful characters
forestcity forest city enterprises home page forest city logo forest city projects properties investor relations press feature feature	business	forestcity forest city enterprises forest city logo forest city projects properties investor relations press feature feature
topsites blogflux tag income salary residency doctors blogs tagged income salary residency doctors blog sites blogs tagged income salary residency doctors owner	business	topsites blogflux tag income salary residency doctors blogs tagged income salary residency doctors blog sites blogs tagged income salary residency doctors owner
answers topic income from salary income salary shopping information compare prices engineering income salary survey magazine product product reviews price store prices	business	answers topic income salary income salary shopping compare prices engineering income salary survey magazine product product reviews price store prices
kdnuggets polls data miner income region poll data miner income salary region graph breakdown income salary region respondents vertical axis excluding students	business	kdnuggets polls data miner income region poll data miner income salary region graph breakdown income salary region respondents vertical axis excluding students
investorwords domestic market domestic market definition domestic market definition domestic market nation market systems trading securities entities	business	investorwords domestic market domestic market definition domestic market definition domestic market nation market systems trading securities entities
tradezone import export trade leads global trade business opportunity mellinger import export business opportunity global trade leads services suppliers manufactures directory importers exporters	business	tradezone import export trade leads global trade business opportunity mellinger import export business opportunity global trade leads services suppliers manufactures directory importers exporters
citizen trade public citizen global trade watch global trade watch section public citizen public-interest founded ralph nader gtw promotes democracy corporate globalization arguing	business	citizen trade public citizen global trade watch global trade watch public citizen public founded ralph nader gtw promotes democracy corporate globalization arguing
cid harvard edu cidtrade global trade negotiations home page global trade negotiations home page center international development harvard university centralized information resource global	business	cid harvard cidtrade global trade negotiations global trade negotiations center international development harvard university centralized resource global
globalsources manufacturers global global sell share e-mail address learn sample trade info trade center call suppliers	business	globalsources manufacturers global global sell share mail address learn sample trade info trade center call suppliers
trade trade law guide global trade law section focuses trade nations commercial law focuses intra-state transactions international law information government	business	trade trade law guide global trade law focuses trade nations commercial law focuses intra transactions international law government
globaltradenetworks global trade networks multilingual import export product directory global trade networks multilingual import export product directory e-marketplace self-managed presentation product localization	business	globaltradenetworks global trade networks multilingual import export product directory global trade networks multilingual import export product directory marketplace managed presentation product localization
fita import export business international trade leads fita global import export business international trade leads fita global trade leads	business	fita import export business international trade leads fita global import export business international trade leads fita global trade leads
globalexchange campaigns fairtrade fair trade rules global economy written institutions world trade organization world bank international monetary	business	globalexchange campaigns fairtrade fair trade rules global economy written institutions trade organization bank international monetary
gtap agecon purdue edu global trade analysis project gtap data models software multi-region applied equilibrium analysis global economic issues organizes training	business	gtap agecon purdue global trade analysis project gtap data models software multi region applied equilibrium analysis global economic issues organizes training
usgtn global trade technology network global network trade specialists domestic offices markets commercial service helps	business	usgtn global trade technology network global network trade specialists domestic offices markets commercial service helps
cometotrade global trade village buyers sellers trade global market corporate buyers expand markets negotiate deals import export surplus equipment	business	cometotrade global trade village buyers sellers trade global market corporate buyers expand markets negotiate deals import export surplus equipment
gtis global trade information services gti premier supplier international merchandise trade data world	business	gtis global trade services gti premier supplier international merchandise trade data
globaltrade tml global trade hinges timely accurate information information	business	globaltrade tml global trade hinges timely accurate
wand wand com directory suppliers traders products wand com directory suppliers traders providers products services buyers wand com source commodities	business	wand wand directory suppliers traders products wand directory suppliers traders providers products services buyers wand source commodities
global trade global trade lead global directory machine manufacturer giant information ltd leading manufacturer specialized machine manufacturer global trade lead global directory	business	global trade global trade lead global directory machine manufacturer giant leading manufacturer specialized machine manufacturer global trade lead global directory
dawn ebr textile losing domestic market -dawn business cent textile products absorbed domestic market adil mahmood chairman pakistan textiles association	business	dawn ebr textile losing domestic market dawn business cent textile products absorbed domestic market adil mahmood chairman pakistan textiles association
tradewatchoz global trade watch global trade watch help australian organisation fairer sustainable	business	tradewatchoz global trade watch global trade watch australian organisation fairer sustainable
ideas repec eui euiwps eco impact multinational entry domestic market structure downloadable author stefanie haller abstract model impact modes multinational entry domestic firms	business	ideas repec eui euiwps eco impact multinational entry domestic market structure downloadable author stefanie haller abstract model impact modes multinational entry domestic firms
allacademic meta index effective market power domestic institutional roots paper critically examine domestic market principal determinant market power international	business	allacademic meta effective market power domestic institutional roots paper critically examine domestic market principal determinant market power international
wikipedia wiki domestic trade domestic market wikipedia encyclopedia economics market mechanism people trade domestic market trade mechanisms country	business	wikipedia wiki domestic trade domestic market wikipedia encyclopedia economics market mechanism people trade domestic market trade mechanisms country
wikipedia wiki japanese domestic market japanese domestic market wikipedia encyclopedia jdm japanese domestic market jdm japan economic market japanese-brand chiefly automobiles	business	wikipedia wiki japanese domestic market japanese domestic market wikipedia encyclopedia jdm japanese domestic market jdm japan economic market japanese brand chiefly automobiles
eur lex europa result direct yes lang where eurovoc whereihm eurovoc domestic market eur-lex search search query eurovoc domestic market provision promotion measures agricultural products market countries	business	eur lex europa result direct lang eurovoc whereihm eurovoc domestic market eur lex search search query eurovoc domestic market provision promotion measures agricultural products market countries
eur lex europa result direct yes lang where eurovoc whereihm eurovoc domestic market eur-lex tiftixa sempliċi tfittxija mistoqsija eurovoc domestic market staff document public consultation market policy summary	business	eur lex europa result direct lang eurovoc whereihm eurovoc domestic market eur lex tiftixa sempliċi tfittxija mistoqsija eurovoc domestic market staff document public consultation market policy summary
marketplace publicradio shows refid marketplace virgin breaks domestic market virgin breaks domestic market virgin america airlines selling tickets flights san francisco crowded	business	marketplace publicradio refid marketplace virgin breaks domestic market virgin breaks domestic market virgin america airlines selling tickets flights san francisco crowded
freethoughts archives ftoi iran domestic market international banking matter national prestige expand ties iranian domestic market global banking	business	freethoughts archives ftoi iran domestic market international banking matter national prestige expand ties iranian domestic market global banking
acronyms thefreedictionary european domestic market european domestic market edm acronyms edm definition european domestic market acronyms abbreviations online dictionary	business	acronyms thefreedictionary european domestic market european domestic market edm acronyms edm definition european domestic market acronyms abbreviations online dictionary
usmarket seekingalpha article equity boost domestic market alpha putting figures rosy domestic stock market proxy vti iwv equity firms deploy cash	business	usmarket seekingalpha article equity boost domestic market alpha putting figures rosy domestic stock market proxy vti iwv equity firms deploy cash
transtats bts gov transtats homepage airline domestic market share chart title airlines share american united southwest delta	business	transtats bts gov transtats homepage airline domestic market share chart title airlines share american united southwest delta
american edu initeb norway domestic market norway domestic market domestic market overview norway population people world quality	business	american initeb norway domestic market norway domestic market domestic market overview norway population people quality
american edu initeb market poland domestic market domestic market poland people poland country population est cia	business	american initeb market poland domestic market domestic market poland people poland country population est cia
jalopnik cars european domestic market mercedetize your sprinter european domestic market mercedetize sprinter jalopnik branding devalue passsenger cars north american market	business	jalopnik cars european domestic market mercedetize sprinter european domestic market mercedetize sprinter jalopnik branding devalue passsenger cars north american market
expresscomputeronline domesticitoutsourcing shtml domestic market outsourcing overdrive express computer era outsourcing domestic market vinutha onwards managed services space bfsi telecom	business	expresscomputeronline domesticitoutsourcing shtml domestic market outsourcing overdrive express computer era outsourcing domestic market vinutha onwards managed services space bfsi telecom
vdacs virginia gov domestic index shtml vdacs marketing services sales market development domestic sales market development assists virginia producers processors marketing products eastern canada	business	vdacs virginia gov domestic shtml vdacs marketing services sales market development domestic sales market development assists virginia producers processors marketing products eastern canada
marketwatch news story story guid bcf siteid virgin america foray domestic market marketwatch virgin america foray domestic market marketwatch intraday data comstock division interactive data corp subject	business	marketwatch news story story guid bcf siteid virgin america foray domestic market marketwatch virgin america foray domestic market marketwatch intraday data comstock division interactive data corp subject
findarticles articles output soars domestic market lags ward auto world articles output soars domestic market lags wards auto world autos looksmart articles	business	findarticles articles output soars domestic market lags ward auto articles output soars domestic market lags wards auto autos looksmart articles
playboyenterprises playboy enterprises inc playboy licensing playboy enterprises corporate information licening information corporate officers board direcotors	business	playboyenterprises playboy enterprises playboy licensing playboy enterprises corporate licening corporate officers board direcotors
https mountsinaicss igreentree css external csspage welcome candidate self service welcome career opportunities mount sinai professionals expand careers salary tuition assistance	business	https mountsinaicss igreentree css external csspage candidate service career opportunities mount sinai professionals expand careers salary tuition assistance
rpsc raytheon employment raytheon polar services company employment employment raytheon polar services company employees invest talents energy ensure national science	business	rpsc raytheon employment raytheon polar services company employment employment raytheon polar services company employees invest talents energy ensure national science
physorg tradepub cat retl retail magazine subscriptions white papers browse retail magazines white papers downloads podcasts titles match skills	business	physorg tradepub cat retl retail magazine subscriptions white papers browse retail magazines white papers downloads podcasts titles match skills
sas industry retail sas retail software merchandise planning crm solutions business driver competition characterizes retail industry globalization deflation diversification sales channels	business	sas industry retail sas retail software merchandise planning crm solutions business driver competition characterizes retail industry globalization deflation diversification sales channels
symbol industry solutions retail retail solutions retail solutions processes symbol technologies transform consumer experience associate productivity maximize chain efficiency	business	symbol industry solutions retail retail solutions retail solutions processes symbol technologies transform consumer experience associate productivity maximize chain efficiency
microsoft dynamics industry retail mspx microsoft dynamics solutions retail proven retail business solutions company technological edge stores retail solutions fit	business	microsoft dynamics industry retail mspx microsoft dynamics solutions retail proven retail business solutions company technological edge stores retail solutions fit
retailsystems rsag retail systems alert eri exchange business intelligence services retail e-commerce chain industries	business	retailsystems rsag retail systems alert eri exchange business intelligence services retail commerce chain industries
infosys industries retail distribution default infosys retail solution solutions services retail infosys retail cpg practice solutions services retail cpg business	business	infosys industries retail distribution default infosys retail solution solutions services retail infosys retail cpg practice solutions services retail cpg business
itretail retail home welcome retail com home creators retail comprehensive suite front-end back-office enterprise software	business	itretail retail retail creators retail comprehensive suite front office enterprise software
zebra zebra index industry solutions industries retail retail barcode rfid solutions retail store printing retailers zebra bar code rfid mobile printing solutions retail manage customers merchandise shelves staff efficiently	business	zebra zebra industry solutions industries retail retail barcode rfid solutions retail store printing retailers zebra bar code rfid mobile printing solutions retail manage customers merchandise shelves staff efficiently
news yahoo business retail yahoo news struggling clothing retailer gap inc pinning veteran canadian merchant retail worlds drug stores books food	business	news yahoo business retail yahoo news struggling clothing retailer gap pinning veteran canadian merchant retail worlds drug stores books food
theretailbulletin retail bulletin retail news resource news resource retailers news information retail industry	business	theretailbulletin retail bulletin retail news resource news resource retailers news retail industry
msdn microsoft architecture retail industry msdn retail industry center segment guidance retail technologists deploy solutions microsoft	business	msdn microsoft architecture retail industry msdn retail industry center segment guidance retail technologists deploy solutions microsoft
retail retail com powered oracle retail com powered oracle smarter retailers partners business retail com retail business	business	retail retail powered oracle retail powered oracle smarter retailers partners business retail retail business
agencycentral agencysearch manufacture agencysearch manufacturing production recruitment agencies manufacturing production recruitment agencies skill location	business	agencycentral agencysearch manufacture agencysearch manufacturing production recruitment agencies manufacturing production recruitment agencies skill location
agencycentral jobsites manufacture manufacturing production jobs job sites listed page websites manufacturing production jobs listed search jobs job search panels	business	agencycentral jobsites manufacture manufacturing production jobs job sites listed websites manufacturing production jobs listed search jobs job search panels
inc resources retail retail business retail business advice strategies business owners retail sales in-store sales retail business e-commerce	business	resources retail retail business retail business advice strategies business owners retail sales store sales retail business commerce
ibm industries retail ibm retail retail demand ibm help transform customer experience employees costs business execute processes seamlessly	business	ibm industries retail ibm retail retail demand ibm transform customer experience employees costs business execute processes seamlessly
retailindustry about retail industry retailing news trends jobs sales retail industry online retailing ecommerce retail news articles retail research statistics sales retail jobs employment career information	business	retailindustry retail industry retailing news trends jobs sales retail industry online retailing ecommerce retail news articles retail statistics sales retail jobs employment career
gartner products research asset retail technologies retail processes enhance customer experience business	business	gartner products asset retail technologies retail processes enhance customer experience business
lewrockwell north north debt inescapable concept business debt gary north covered issues social debt personal debt business debt business biological	business	lewrockwell north north debt inescapable concept business debt gary north covered issues social debt personal debt business debt business biological
americanfinasco business debt management solutions american finasco business debt management american finasco debt relief combination debt reduction payment plans	business	americanfinasco business debt management solutions american finasco business debt management american finasco debt relief combination debt reduction payment plans
commercialdebtcounseling commercial debt counseling business debt consolidation business debt consolidation commercial debt counseling business solutions corporate bankruptcy	business	commercialdebtcounseling commercial debt counseling business debt consolidation business debt consolidation commercial debt counseling business solutions corporate bankruptcy
business directory financial services consumer finance consumer credit debt consolidation debt consolidation information business com advisers consultants credit industry specializing consumer debt consolidation	business	business directory financial services consumer finance consumer credit debt consolidation debt consolidation business advisers consultants credit industry specializing consumer debt consolidation
forbes entrepreneurs equity debt smallbusiness ent fin nolofinancing financing business equity debt forbes com lowdown borrow money sell business equity investor	business	forbes entrepreneurs equity debt smallbusiness ent fin nolofinancing financing business equity debt forbes lowdown borrow money sell business equity investor
lbtllc debt restructuring lloyd benton bankruptcy business corporate debt restructuring company lauderdale florida handles business debt resolution corporate turnaround consulting	business	lbtllc debt restructuring lloyd benton bankruptcy business corporate debt restructuring company lauderdale florida handles business debt resolution corporate turnaround consulting
equifax biz solutions debtrecovery shtml equifax business solutions debt recovery products debt crippling business heightened focus managing expenses efficiently debtors collect	business	equifax biz solutions debtrecovery shtml equifax business solutions debt recovery products debt crippling business heightened focus managing expenses efficiently debtors collect
finance yahoo how guide career work finance business debt equity career career guide finance business debt equity	business	finance yahoo guide career finance business debt equity career career guide finance business debt equity
templetonthorp diligence debt recovery business intelligence asset international asset retrieval debt recovery firm news service	business	templetonthorp diligence debt recovery business intelligence asset international asset retrieval debt recovery firm news service
businesslenders sba business loan business lenders debt consolidation franchise business bank renew loan borrower pay dollars costs	business	businesslenders sba business loan business lenders debt consolidation franchise business bank renew loan borrower pay dollars costs
management about handling business debt handling business debt management businesses engine drives economy surprisingly	business	management handling business debt handling business debt management businesses engine drives economy surprisingly
wikipedia wiki retail retailing wikipedia encyclopedia retail establishments shops stores retailing replicates retail online shops	business	wikipedia wiki retail retailing wikipedia encyclopedia retail establishments shops stores retailing replicates retail online shops
retail careerbuilder retail jobs careerbuilder com retail jobs job search careerbuilder leader job search sites access jobs	business	retail careerbuilder retail jobs careerbuilder retail jobs job search careerbuilder leader job search sites access jobs
allretailjobs retail jobs retail careers retail resumes retail job job board management hourly retail jobs employer section post jobs search resumes	business	allretailjobs retail jobs retail careers retail resumes retail job job board management hourly retail jobs employer post jobs search resumes
hotjobs yahoo jobs retail retail jobs yahoo hotjobs search retail jobs retail job search yahoo hotjobs jobs listed daily	business	hotjobs yahoo jobs retail retail jobs yahoo hotjobs search retail jobs retail job search yahoo hotjobs jobs listed daily
download press industrial manufacture production manager and industrial manufacture production manager stock control software industrial manufacture production manager stock control software	business	download press industrial manufacture production manager industrial manufacture production manager stock control software industrial manufacture production manager stock control software
volvocars corporation factsandfigures production manufacturing production figures volvo corporation volvo cars cars production celebrate car manufacturer	business	volvocars corporation factsandfigures production manufacturing production figures volvo corporation volvo cars cars production celebrate car manufacturer
strategosinc just time lean manufacturing history history production lean manufacturing developed articles downloads	business	strategosinc time lean manufacturing history history production lean manufacturing developed articles downloads
fotosearch dgv stock footage factory industry manufacture production retro factory industry manufacture production retro stock footage digital vision video fotosearch stock photography stock footage helps	business	fotosearch dgv stock footage factory industry manufacture production retro factory industry manufacture production retro stock footage digital vision video fotosearch stock photography stock footage helps
moneycentral msn investor market home investing market summary msn money concise view financial market happenings market commentary breaking news headlines indexes	business	moneycentral msn investor market investing market summary msn money concise view financial market happenings market commentary breaking news headlines indexes
money cnn markets dow nasdaq stock market data cnnmoney com financial market coverage breaking news analysis stock quotes hours market data research earnings	business	money cnn markets dow nasdaq stock market data cnnmoney financial market coverage breaking news analysis stock quotes hours market data earnings
gartner products research markets markets markets technology markets statistics forecasts market analysis trust gartner dataquest tracks	business	gartner products markets markets markets technology markets statistics forecasts market analysis trust gartner dataquest tracks
answers topic market market definition synonyms answers com mar·ket public gathering buying selling merchandise sale	business	answers topic market market definition synonyms answers public gathering buying selling merchandise sale
market market net root market net high-speed dedicated leased-line slip ppp connections businesses san francisco bay	business	market market net root market net speed dedicated leased slip ppp connections businesses san francisco bay
amarketnaturalfoods market manchester home page selection organic meat organically grown dairy natural foods products hampshire selection vitamin	business	amarketnaturalfoods market manchester selection organic meat organically grown dairy natural foods products hampshire selection vitamin
wikipedia wiki financial market financial market wikipedia encyclopedia economics financial market mechanism people buy sell trade financial securities stocks bonds	business	wikipedia wiki financial market financial market wikipedia encyclopedia economics financial market mechanism people buy sell trade financial securities stocks bonds
marketwatch siteid avatar seen dist ctmw stock market quotes business news financial news stock market quotes business news financial news leading provider marketwatch com wholly-owned subsidiary dow company inc	business	marketwatch siteid avatar dist ctmw stock market quotes business news financial news stock market quotes business news financial news leading provider marketwatch wholly owned subsidiary dow company
today reuters investing marketshome stock market news stock quotes investing markets options reuters com source stock market news stock quotes investing markets options reuters leading global provider news	business	reuters investing marketshome stock market news stock quotes investing markets options reuters source stock market news stock quotes investing markets options reuters leading global provider news
biz yahoo topic markets markets news archive yahoo finance markets news archive yahoo finance yahoo finance breaking news headlines articles companies economy markets	business	biz yahoo topic markets markets news archive yahoo finance markets news archive yahoo finance yahoo finance breaking news headlines articles companies economy markets
marketlist market writers market resource market writers market resource genre fiction guidelines articles interviews reviews classifieds	business	marketlist market writers market resource market writers market resource genre fiction guidelines articles interviews reviews classifieds
mixmarket microfinance mix market mix-market home-page mix market global microfinance marketplace information microfinance institutions public funds	business	mixmarket microfinance mix market mix market mix market global microfinance marketplace microfinance institutions public funds
marketday market americas food fundraiser fundraising food cooperative opportunities money schools selling food products	business	marketday market americas food fundraiser fundraising food cooperative opportunities money schools selling food products
reuters investing investing news personal finance stock market mutual funds reuters com source investing news personal finance stock market mutual funds investments reuters leading global provider news	business	reuters investing investing news personal finance stock market mutual funds reuters source investing news personal finance stock market mutual funds investments reuters leading global provider news
businessweek investor markets stock markets stock market indices businessweek updates stock market stock market headlines stock exchange updated investing information	business	businessweek investor markets stock markets stock market indices businessweek updates stock market stock market headlines stock exchange updated investing
bloomberg bloomberg com treasuries post weekly advance credit market rout bernanke forecast stronger growth threat market turmoil	business	bloomberg bloomberg treasuries post weekly advance credit market rout bernanke forecast stronger growth threat market turmoil
allbusiness business finance business loans business debt refinancing finance business loans business debt refinancing conversion debt outstanding overdue debt instrument	business	allbusiness business finance business loans business debt refinancing finance business loans business debt refinancing conversion debt outstanding overdue debt instrument
finance yahoo yahoo finance stock quotes market news mortgage rates yahoo finance stock quotes news portfolio management resources international market data message boards mortgage rates	business	finance yahoo yahoo finance stock quotes market news mortgage rates yahoo finance stock quotes news portfolio management resources international market data message boards mortgage rates
marketwatch markets stock market news bond market news currencies market news bond market news marketwatch stock market news currencies market news	business	marketwatch markets stock market news bond market news currencies market news bond market news marketwatch stock market news currencies market news
blu ray news blu-ray com blu-ray news singulus manufacture singulus manufacture production equipment blu-ray disc manufacturing costs mass production	business	blu ray news blu ray blu ray news singulus manufacture singulus manufacture production equipment blu ray disc manufacturing costs mass production
amazon regulations importation manufacture compounding qpaz amazon com regulations importation importation manufacture production compounding sale dispensing opium cocoa compound	business	amazon regulations importation manufacture compounding qpaz amazon regulations importation importation manufacture production compounding sale dispensing opium cocoa compound
esl about library lexical bllexlist production production manufacturing english glossary english production manufacturing english glossary english core vocabulary	business	esl library lexical bllexlist production production manufacturing english glossary english production manufacturing english glossary english core vocabulary
executivesontheweb job results func manufacturing production job vacancies manufacturing production job vacancies executive recruitment jobs senior appointments executivesontheweb com search database	business	executivesontheweb job func manufacturing production job vacancies manufacturing production job vacancies executive recruitment jobs senior appointments executivesontheweb search database
ncbi nlm nih gov entrez query fcgi cmd retrieve pubmed list uids dopt abstract modeling development medical instrument manufacture modeling development medical instrument manufacture production system article russian tsisar mesh computers english abstract	business	ncbi nlm nih gov entrez query fcgi cmd retrieve pubmed list uids dopt abstract modeling development medical instrument manufacture modeling development medical instrument manufacture production system article russian tsisar mesh computers english abstract
directmail findlay data production manufacturing production data production function manufacturing capacity company findlay publications uniquely measures capacity	business	directmail findlay data production manufacturing production data production function manufacturing capacity company findlay publications uniquely measures capacity
highbeam software automates punch manufacture production automation tooling production software automates punch manufacture production automation mate punch die company article automated	business	highbeam software automates punch manufacture production automation tooling production software automates punch manufacture production automation mate punch die company article automated
topjobs homepagesearch country parcatid title manufacture production and procurement topjobs jobs search manufacture production view vacancies matching search selection topjobs homepage friend feature	business	topjobs homepagesearch country parcatid title manufacture production procurement topjobs jobs search manufacture production view vacancies matching search selection topjobs homepage friend feature
senate gov info bills creates civil liability manufacture production creates civil liability manufacture production distribution pornography sponsor house fiscal	business	senate gov info bills creates civil liability manufacture production creates civil liability manufacture production distribution pornography sponsor house fiscal
nsf gov statistics infbrief nsf latin america high-tech manufacturing outpaced high-tech manufacturing accounted percent manufacturing production countries percent	business	nsf gov statistics infbrief nsf latin america tech manufacturing outpaced tech manufacturing accounted percent manufacturing production countries percent
emeraldinsight insight viewcontentitem contenttype article hdaction lnkhtml contentid dtype sub history false emerald fulltext article production grade tooling layer production environment tool manufacturing process experience manufacturing production grade tooling	business	emeraldinsight insight viewcontentitem contenttype article hdaction lnkhtml contentid dtype history false emerald fulltext article production grade tooling layer production environment tool manufacturing process experience manufacturing production grade tooling
saqa docs qualstds comment mecheng std title manufacture production tooling drawing sample frames manufacturing tooling adhered indicators materials manufacture production tooling appropriate	business	saqa docs qualstds comment mecheng std title manufacture production tooling drawing sample frames manufacturing tooling adhered indicators materials manufacture production tooling
autoid mit edu convocation shanghai presentations tao lin china rfid forum research taolin ppt asset tracking market opportunities solutions tested running manufacture production environment project development goals project	business	autoid mit convocation shanghai presentations tao lin china rfid forum taolin ppt asset tracking market opportunities solutions tested running manufacture production environment project development goals project
hbcengineeringsolutions myhome china east eastern europe chinese manufacture production chinese manufacturing east eastern european manufacture engineering production toolmaking injection moulding press tools mould tools	business	hbcengineeringsolutions myhome china east eastern europe chinese manufacture production chinese manufacturing east eastern european manufacture engineering production toolmaking injection moulding press tools mould tools
wikipedia wiki market market wikipedia encyclopedia market social arrangement buyers sellers discover information carry voluntary exchange services	business	wikipedia wiki market market wikipedia encyclopedia market social arrangement buyers sellers discover carry voluntary exchange services
nasdaq nasdaq stock market market security information nasdaq counter stock exchange portfolio tracking ipo information	business	nasdaq nasdaq stock market market security nasdaq counter stock exchange portfolio tracking ipo
careers campbellsoupcompany campbell soup company careers campbell career opportunities world	business	careers campbellsoupcompany campbell soup company careers campbell career opportunities
bdl business debtline welcome business debtline helpline confidential independent advice deal debt	business	bdl business debtline business debtline helpline confidential independent advice deal debt
gecfo finneeds debt consolidation business debt consolidation solutions business debt consolidation solutions senior secured debt benefits extra capital invest	business	gecfo finneeds debt consolidation business debt consolidation solutions business debt consolidation solutions senior secured debt benefits extra capital invest
econlib library enc economicgrowth economic growth romer concise encyclopedia economic growth romer concise encyclopedia economics	business	econlib library enc economicgrowth economic growth romer concise encyclopedia economic growth romer concise encyclopedia economics
michigan gov cis dleg dept labor economic growth department labor economic growth dept labor economic growth	business	michigan gov cis dleg dept labor economic growth department labor economic growth dept labor economic growth
worldbank macroeconomics understanding countries grown periods countries economic growth stagnated capita income	business	worldbank macroeconomics understanding countries grown periods countries economic growth stagnated capita income
ceg ceg center economic growth home ceg economic business development organization dedicated developing promoting regional efforts attract high-tech talent growth	business	ceg ceg center economic growth ceg economic business development organization dedicated developing promoting regional efforts attract tech talent growth
aeeg aeeg american entrepreneurs economic growth american entrepreneurs economic growth dedicated united voice growth businesses public policies foster	business	aeeg aeeg american entrepreneurs economic growth american entrepreneurs economic growth dedicated united voice growth businesses public policies foster
mitpress mit edu book home tcl isbn economic growth mit press mit press online catalog descriptions in-print out-of-print books journals online subscription options	business	mitpress mit book tcl isbn economic growth mit press mit press online catalog descriptions print print books journals online subscription options
springerlink link journal economic growth	business	springerlink link journal economic growth
cnn cnn topstories index gdp percent quarter tame inflation nation economic growth picked quarter government reading economy period	business	cnn cnn topstories gdp percent quarter tame inflation nation economic growth picked quarter government reading economy period
wikipedia wiki tax tariff and trade tax tariff trade wikipedia encyclopedia tax tariff trade laws political region trade bloc consumption production encouraged	business	wikipedia wiki tax tariff trade tax tariff trade wikipedia encyclopedia tax tariff trade laws political region trade bloc consumption production encouraged
usitc gov tata index tariff information center information regarding harmonized tariff schedule	business	usitc gov tata tariff center harmonized tariff schedule
usitc gov tata hts harmonized tariff schedule united annotated page online versions harmonized tariff schedule updated version printed publication	business	usitc gov tata hts harmonized tariff schedule united annotated online versions harmonized tariff schedule updated version printed publication
dataweb usitc gov usitc interactive tariff trade database usitc interactive tariff trade dataweb international trade statistics tariff data public full-time charge	business	dataweb usitc gov usitc interactive tariff trade database usitc interactive tariff trade dataweb international trade statistics tariff data public time charge
dataweb usitc gov scripts tariff usitc interactive tariff trade database usitc responsible publishing harmonized tariff schedule united hts customs service responsible	business	dataweb usitc gov scripts tariff usitc interactive tariff trade database usitc responsible publishing harmonized tariff schedule united hts customs service responsible
ups content resources service tariff ups legal conditions legal conditions ups tariff conditions service web ups technology agreement user rights	business	content resources service tariff legal conditions legal conditions tariff conditions service web technology agreement user rights
wikipedia wiki tariff tariff wikipedia encyclopedia tariff tax foreign importation ship port customs officer inspects contents charges tax	business	wikipedia wiki tariff tariff wikipedia encyclopedia tariff tax foreign importation ship port customs officer inspects contents charges tax
bls gov opub ooq winter art economic growth productivity calculated measuring nonfarm output economic growth	business	bls gov opub ooq winter art economic growth productivity calculated measuring nonfarm output economic growth
columbia edu grbook sala-i-martin economic growth chapter data economic growth growth accounting chapter empirical analysis regional data sets	business	columbia grbook sala martin economic growth chapter data economic growth growth accounting chapter empirical analysis regional data sets
elsa berkeley edu chad handbook handbook economic growth published version handbook economic growth university subscription handbooks	business	elsa berkeley chad handbook handbook economic growth published version handbook economic growth university subscription handbooks
allbusiness walt disney company ceo employment agreement iger ceo employment agreement walt disney company iger dated	business	allbusiness walt disney company ceo employment agreement iger ceo employment agreement walt disney company iger dated
chuckecheese company info employment chuck cheese company info employment chuck cheese company info employment chuck cheese employment company locations usa canada	business	chuckecheese company info employment chuck cheese company info employment chuck cheese company info employment chuck cheese employment company locations usa canada
chrisking company comp employment kcg company employment employment passionate progressive company	business	chrisking company comp employment kcg company employment employment passionate progressive company
claria employment company employment employment claria talented energetic people company sponsored medical dental vision plans domestic partner	business	claria employment company employment employment claria talented energetic people company sponsored medical dental vision plans domestic partner
forumcomm employment forum communications company employment forum communications company integrated businesses serving public medium newspaper publishing	business	forumcomm employment forum communications company employment forum communications company integrated businesses serving public medium newspaper publishing
hecla mining mainemployment hecla mining company employment hecla mining company mines processes silver gold lead zinc united mexico venezuela established company rich	business	hecla mining mainemployment hecla mining company employment hecla mining company mines processes silver gold lead zinc united mexico venezuela established company rich
wikipedia wiki economic growth economic growth wikipedia encyclopedia economic growth value services economy measured percent rate	business	wikipedia wiki economic growth economic growth wikipedia encyclopedia economic growth services economy measured percent rate
stanford edu promer pubs economic growth romer introduction growth theory fortune encyclopedia economics	business	stanford promer pubs economic growth romer introduction growth theory fortune encyclopedia economics
stanford edu promer economicgrowth economic growth economic growth whenever people resources rearrange valuable metaphor production economy	business	stanford promer economicgrowth economic growth economic growth people resources rearrange valuable metaphor production economy
whitehouse gov infocus economy jobs economic growth index page information economy budget	business	whitehouse gov infocus economy jobs economic growth economy budget
worldbank research growth economic growth research political economic social data history developing countries prospects world bank research department	business	worldbank growth economic growth political economic social data history developing countries prospects bank department
amazon economic growth robert barro amazon com economic growth edition books barro amazon com economic growth edition books barro xavier sala-i-martin barro xavier sala-i-martin	business	amazon economic growth robert barro amazon economic growth edition books barro amazon economic growth edition books barro xavier sala martin barro xavier sala martin
amazon economic growth david weil amazon com economic growth books weil amazon com economic growth books weil weil	business	amazon economic growth david weil amazon economic growth books weil amazon economic growth books weil weil
economicgrowth lewiston auburn economic growth council	business	economicgrowth lewiston auburn economic growth council
econ yale edu egcenter economic growth center homepage studies promoties understanding economic development process low-income countries	business	econ yale egcenter economic growth center homepage studies promoties understanding economic development process low income countries
tax museum american party system tariff crises france britain federal government rely tariff source funding	business	tax museum american party system tariff crises france britain federal government rely tariff source funding
https retailgateway bdi gte verizon tariffs verizon communications accurate electronic representation tariffs filed public utility	business	https retailgateway bdi gte verizon tariffs verizon communications accurate electronic representation tariffs filed public utility
cbsa general publications customs tariff customs tariff customs tariff world customs organization wco harmonized commodity description coding system	business	cbsa publications customs tariff customs tariff customs tariff customs organization wco harmonized commodity description coding system
fas usda gov scriptsw wtopdf wtopdf frm wto tariff schedules	business	fas usda gov scriptsw wtopdf wtopdf frm wto tariff schedules
adp business solutions adp payroll services human resources adp business solutions optimal business process management payroll benefit administration adp leader human resources	business	adp business solutions adp payroll services human resources adp business solutions optimal business process management payroll benefit administration adp leader human resources
mediacomcc business services mediacom business services delivered proprietary broadband fiber network mediacom business services reliable round-the-clock technical	business	mediacomcc business services mediacom business services delivered proprietary broadband fiber network mediacom business services reliable round clock technical
atmosenergy business index atmos energy business service atmos energy services designed customers manage properties apartment complexes	business	atmosenergy business atmos energy business service atmos energy services designed customers manage properties apartment complexes
osmb dgs gov business dvbe services home matters business dvbe certification	business	osmb dgs gov business dvbe services matters business dvbe certification
dti gov bbf small business index business service information services dti help businesses	business	dti gov bbf business business service services dti businesses
oregon gov dcbs oregon department consumer business services oregon department consumer business services	business	oregon gov dcbs oregon department consumer business services oregon department consumer business services
ssa gov bso social security online business services online welcome business services online bso applications wage reporting social security verification service ssa- electronic records	business	ssa gov bso social security online business services online business services online bso applications wage reporting social security verification service ssa electronic records
businessservicesuk business services professional business service provider business services host business services market specialise funding solutions business strategy internet marketing	business	businessservicesuk business services professional business service provider business services host business services market specialise funding solutions business strategy internet marketing
ibm ibm united ibm corporate home page entry information ibm products services	business	ibm ibm united ibm corporate entry ibm products services
smallbizpros padgett business services accounting tax franchise opportunity business financial services franchise request	business	smallbizpros padgett business services accounting tax franchise opportunity business financial services franchise request
credit vol business debt credit com business owners business credit card issued credit card company help finance business expenses	business	credit business debt credit business owners business credit card issued credit card company finance business expenses
allexperts business debt business debt business information business allexperts com business debt business information business	business	allexperts business debt business debt business business allexperts business debt business business
business directory financial services commercial finance debt recovery debt recovery vendors business debt restructuring business com providers commercial collections corporate debt restructuring services companies specialize helping clients business debt	business	business directory financial services commercial finance debt recovery debt recovery vendors business debt restructuring business providers commercial collections corporate debt restructuring services companies specialize helping clients business debt
bizcap bizcap debt negotiation venture capital firms account business capital dedicated unparalleled financial innovations business debt negotiation account receivable financing	business	bizcap bizcap debt negotiation venture capital firms account business capital dedicated unparalleled financial innovations business debt negotiation account receivable financing
wesolvedebt business debt elimination solutions business debt management professional business debt elimination debt management specialists solve debt	business	wesolvedebt business debt elimination solutions business debt management professional business debt elimination debt management specialists solve debt
score score counselors america business nonprofit association dedicated encouraging formation growth business nationwide counseling mentor programs	business	score score counselors america business nonprofit association dedicated encouraging formation growth business nationwide counseling mentor programs
smallbusiness findlaw bankruptcy browse bankruptcy debt findlaw findlaw business bankruptcy debt closing business declaring bankruptcy revenue service directory web	business	smallbusiness findlaw bankruptcy browse bankruptcy debt findlaw findlaw business bankruptcy debt closing business declaring bankruptcy revenue service directory web
rurdev usda gov rbs department agriculture rural business -cooperative service mission promote understanding cooperative business viable organizational marketing distributing	business	rurdev usda gov rbs department agriculture rural business cooperative service mission promote understanding cooperative business viable organizational marketing distributing
irs gov businesses small business self-employed one-stop resource revenue service united department treasury irs conduct business	business	irs gov businesses business employed resource revenue service united department treasury irs conduct business
ltl upsfreight shipping rules index ups freight rules tariff charges line haul transportation rates charges tariffs contracts agreed pricing provisions reference	business	ltl upsfreight shipping rules freight rules tariff charges haul transportation rates charges tariffs contracts agreed pricing provisions reference
econlib library taussig tsgenc taussig essay tariffs encyclopedia britannica taussig frank essay tariffs encyclopedia britannica	business	econlib library taussig tsgenc taussig essay tariffs encyclopedia britannica taussig frank essay tariffs encyclopedia britannica
pctb pctb publisher ocean intermodal nvocc freight tariffs pctb publisher ocean intermodal nvocc freight tariffs service contracts federal maritime commission fmc	business	pctb pctb publisher ocean intermodal nvocc freight tariffs pctb publisher ocean intermodal nvocc freight tariffs service contracts federal maritime commission fmc
atpco atpco-airline tariff publishing company airline tariff publishing company world leader collection distribution fares fare-related data airline travel industry	business	atpco atpco airline tariff publishing company airline tariff publishing company leader collection distribution fares fare data airline travel industry
state gov time smoot-hawley tariff smoot-hawley tariff act tariffs historically levels intention legislation	business	gov time smoot hawley tariff smoot hawley tariff tariffs historically levels intention legislation
delmarva home choice tariffs tariffs delmarva power delaware electric tariff pdf delaware natural gas tariff pdf delmarva power blueprint cover letter pdf	business	delmarva choice tariffs tariffs delmarva power delaware electric tariff pdf delaware natural gas tariff pdf delmarva power blueprint cover letter pdf
tariffmanagement international tariff management inc itm helps importers exporters opportunities customs regulations duty burden duty	business	tariffmanagement international tariff management itm helps importers exporters opportunities customs regulations duty burden duty
sce aboutsce regulatory tariffbooks sce sce tariff books tariffs effective right-hand corner tariff effective pending review california public	business	sce aboutsce regulatory tariffbooks sce sce tariff books tariffs effective hand corner tariff effective pending review california public
ucas candq tariff index ucas tariff qualifications tariff achievement entry education	business	ucas candq tariff ucas tariff qualifications tariff achievement entry education
entrepreneur servicefranchises index service business opportunity service business opportunity online directory business service franchises opportunities	business	entrepreneur servicefranchises service business opportunity service business opportunity online directory business service franchises opportunities
forbes services business services news service industry news forbes com business services news financial markets coverage personal finance advice tools investing tips forbes affiliated publications	business	forbes services business services news service industry news forbes business services news financial markets coverage personal finance advice tools investing tips forbes affiliated publications
coxbusiness cox business services coxsmart commercial building program cox carrier access service cox enterprise connectivity view promotions press	business	coxbusiness cox business services coxsmart commercial building program cox carrier access service cox enterprise connectivity view promotions press
bmc bmc common templates hou generic tab business service management drive business value drive business value management technology processes	business	bmc bmc common templates hou generic tab business service management drive business drive business management technology processes
ibm software tivoli solutions bsm business service management solutions ibm tivoli software ibm tivoli business service management solutions employed help performance resources affect	business	ibm software tivoli solutions bsm business service management solutions ibm tivoli software ibm tivoli business service management solutions employed performance resources affect
orange business welcome orange business services navigation haute navigation gauche contenu orange business services straight homepage orange- business com visit	business	orange business orange business services navigation haute navigation gauche contenu orange business services straight homepage orange business visit
loc gov business business reference services library congress business reading reading library congress research reference services congress	business	loc gov business business reference services library congress business reading reading library congress reference services congress
mfjenterprises mfj enterprises inc manufacturer amateur radio shortwave accessories manuals reviews	business	mfjenterprises mfj enterprises manufacturer amateur radio shortwave accessories manuals reviews
ferguson ferguson enterprises inc plumbing builder products ferguson plumbing builder products industrial pipe valves fittings heating cooling equipment waterworks products	business	ferguson ferguson enterprises plumbing builder products ferguson plumbing builder products industrial pipe valves fittings heating cooling equipment waterworks products
coxenterprises cox enterprises diversified media company divisions television radio broadcasting newspaper publishing cable systems internet business	business	coxenterprises cox enterprises diversified media company divisions television radio broadcasting newspaper publishing cable systems internet business
adviceguide index life tax income tax income tax information income tax calculated collected	business	adviceguide life tax income tax income tax income tax calculated collected
com website online tax resource dedicated helping people information news taxes downloadable tax	business	website online tax resource dedicated helping people news taxes downloadable tax
ftb gov franchise tax board homepage department collects personal income taxes bank corporation taxes california access tax information	business	ftb gov franchise tax board homepage department collects personal income taxes bank corporation taxes california access tax
ofbiz apache ofbiz apache business project source apache business project source enterprise automation software project licensed apache license version	business	ofbiz apache ofbiz apache business project source apache business project source enterprise automation software project licensed apache license version
sbir dsu edu business innovation research upcoming events sbir conference richardson link business survey	business	sbir dsu business innovation upcoming events sbir conference richardson link business survey
digibuy cgi bin dept business project management business process modeling uml prod spreadsheet scheduler user solutions inc project management job scheduling prod	business	digibuy cgi bin dept business project management business process modeling uml prod spreadsheet scheduler user solutions project management job scheduling prod
taxadmin fta rate ind inc income tax rates- rate reported persons deducting federal income tax married persons filing jointly rates apply income	business	taxadmin fta rate ind income tax rates rate reported persons deducting federal income tax married persons filing jointly rates apply income
openbusiness business project build online resource innovative business models ideas tools publish openbusiness guidebook	business	openbusiness business project build online resource innovative business models ideas tools publish openbusiness guidebook
freshmeat projects ofbiz freshmeat net project business project business project tools enterprise applications erp crm e-commerce scm mrp cmms eam	business	freshmeat projects ofbiz freshmeat net project business project business project tools enterprise applications erp crm commerce scm mrp cmms eam
smacna management smacna business project management business project management smacna publications surveys educational programs smacna managers abreast business practices	business	smacna management smacna business project management business project management smacna publications surveys educational programs smacna managers abreast business practices
bppm business performance project management business performance project management leading exhibition showcasing software training resource specialists project programme	business	bppm business performance project management business performance project management leading exhibition showcasing software training resource specialists project programme
sunlightlabs research familybusiness sunlight labs congressional spouse project congressional family business citizen journalists investigated advance warning distributed research project	business	sunlightlabs familybusiness sunlight labs congressional spouse project congressional family business citizen journalists investigated advance warning distributed project
humanrightsbusiness human rights business human rights business project strives expertise human rights research community experience business	business	humanrightsbusiness human rights business human rights business project strives expertise human rights community experience business
microsoft sql solutions projectreal mspx microsoft sql server project real— business intelligence practice learn project cooperative microsoft technology partners customer data scenarios business	business	microsoft sql solutions projectreal mspx microsoft sql server project business intelligence practice learn project cooperative microsoft technology partners customer data scenarios business
sbp business project independent south african sector specialist research unit engaged business development	business	sbp business project independent south african sector specialist unit engaged business development
finance indiamart taxation income tax indian income tax income tax guide income tax india india income tax guide guide income tax india taxable incomes tax incentives tax liabilities rebates rate tax allowances	business	finance indiamart taxation income tax indian income tax income tax guide income tax india india income tax guide guide income tax india taxable incomes tax incentives tax liabilities rebates rate tax allowances
taxmann taxmanndit xtras taxcalc tax computation help compute tax liability taxable income comprehensive version income tax calculation software	business	taxmann taxmanndit xtras taxcalc tax computation compute tax liability taxable income comprehensive version income tax calculation software
incometaxindia gov income tax rules income tax india income tax department website understanding income tax rules	business	incometaxindia gov income tax rules income tax india income tax department website understanding income tax rules
nico northern ireland public sector enterprises ltd welcome ni-co leading providers technical assistance europe	business	nico northern ireland public sector enterprises ni leading providers technical assistance europe
lowcarbonbuildings how public public charitable sector carbon buildings programme public sector charitable organisations apply carbon buildings programme grant phase phase	business	lowcarbonbuildings public public charitable sector carbon buildings programme public sector charitable organisations apply carbon buildings programme grant phase phase
wikipedia wiki income tax income tax wikipedia encyclopedia income tax tax levied financial income persons corporations legal entities income tax systems	business	wikipedia wiki income tax income tax wikipedia encyclopedia income tax tax levied financial income persons corporations legal entities income tax systems
wikipedia wiki income tax the united states income tax united wikipedia encyclopedia municipal governments impose income taxes federal income tax imposed article section clause	business	wikipedia wiki income tax united income tax united wikipedia encyclopedia municipal governments impose income taxes federal income tax imposed article clause
irs gov revenue service government agency responsible tax collection tax law enforcement income tax instructions agency publications	business	irs gov revenue service government agency responsible tax collection tax law enforcement income tax instructions agency publications
irs gov individuals article qualify eitc eligible income tax credit eitc irs income tax credit initiative report congress	business	irs gov individuals article qualify eitc eligible income tax credit eitc irs income tax credit initiative report congress
law cornell edu wex index income tax income tax wex revenue code embodied title united code lineal descendant income tax act	business	law cornell wex income tax income tax wex revenue code embodied title united code lineal descendant income tax
savewealth taxes rates tax rates income tax rates lookup married trust income tax rates	business	savewealth taxes rates tax rates income tax rates lookup married trust income tax rates
infoplease ipa history income tax united infoplease com civil war congress enacted nation income tax law forerunner modern income tax	business	infoplease ipa history income tax united infoplease civil war congress enacted nation income tax law forerunner modern income tax
hrblock block taxes online tax preparation tax software filing source tax preparation tax filing income taxes online tax program tax software taxcut professional tax services	business	hrblock block taxes online tax preparation tax software filing source tax preparation tax filing income taxes online tax program tax software taxcut professional tax services
incometaxbangalore income tax department karnataka goa region welcome website income tax department karnataka goa region vehicle disseminate information	business	incometaxbangalore income tax department karnataka goa region website income tax department karnataka goa region vehicle disseminate
revenue delaware gov delaware file personal income tax prior online tax payment check status personal income tax refund	business	revenue delaware gov delaware file personal income tax prior online tax payment check status personal income tax refund
ustreas gov education fact sheets taxes ustax shtml treasury sheet history tax system driven war funded income tax war nature income tax altered	business	ustreas gov education sheets taxes ustax shtml treasury sheet history tax system driven war funded income tax war nature income tax altered
hmrc gov rates revenue customs rates allowances income tax rates allowances income tax income tax allowances chancellor announces rates allowances pre-budget report precedes	business	hmrc gov rates revenue customs rates allowances income tax rates allowances income tax income tax allowances chancellor announces rates allowances pre budget report precedes
incometaxindia gov income tax department income tax department website home page page	business	incometaxindia gov income tax department income tax department website
dmoz business management project and program management directory business management project program management project process management associates project management process business process analysis mentoring consulting design development	business	dmoz business management project program management directory business management project program management project process management associates project management process business process analysis mentoring consulting design development
dmoz business directory business directory project partnership aol search dmoz report abuse spam help directory business	business	dmoz business directory business directory project partnership aol search dmoz report abuse spam directory business
webstandards learn articles web standards for business web standards business web standards project benefits web standards topic covered web standards project netscape devedge strategy central	business	webstandards learn articles web standards business web standards business web standards project benefits web standards topic covered web standards project netscape devedge strategy central
linas linux web project linux business solutions project linux business solutions project comprehensive framework marketing collateral information linux	business	linas linux web project linux business solutions project linux business solutions project comprehensive framework marketing collateral linux
yaerd real estate investment group estate investment information advice estate investment guide safe investing estate investment clubs yaerd information objective advice	business	yaerd real estate investment estate investment advice estate investment guide safe investing estate investment clubs yaerd objective advice
wikipedia wiki investment fund collective investment scheme wikipedia encyclopedia collective investment scheme investing money people participate investments feasible	business	wikipedia wiki investment fund collective investment scheme wikipedia encyclopedia collective investment scheme investing money people participate investments feasible
ecclesiastical ourproducts investments index ethical investments personal investment ecclesiastical pride ethical socially resonsible investment opportunities personal investment	business	ecclesiastical ourproducts investments ethical investments personal investment ecclesiastical pride ethical socially resonsible investment opportunities personal investment
domini domini social investments socially responsible mutual funds shareholders domini funds world invest mutual funds money market account help engage companies global	business	domini domini social investments socially responsible mutual funds shareholders domini funds invest mutual funds money market account engage companies global
aiminvestments investments home selection funds categories share classes	business	aiminvestments investments selection funds categories share classes
investmentmap investment personal finance home page investmentmap com leading online guide investing categorized links financial investing news research tools	business	investmentmap investment personal finance investmentmap leading online guide investing categorized links financial investing news tools
globalpolicy globaliz econ index globalization economy global policy forum page analyzes economic globalization examines resisted regulated promote sustainable development	business	globalpolicy globaliz econ globalization economy global policy forum analyzes economic globalization examines resisted regulated promote sustainable development
globalpolicy globaliz define index defining globalization conversely economic globalization inequality slows social development international tensions telegraph kathmandu	business	globalpolicy globaliz define defining globalization conversely economic globalization inequality slows social development international tensions telegraph kathmandu
wikipedia wiki globalization globalization wikipedia encyclopedia economics globalization convergence prices products wages index measures dimensions globalization economic	business	wikipedia wiki globalization globalization wikipedia encyclopedia economics globalization convergence prices products wages measures dimensions globalization economic
ifg programs alternatives alternatives economic globalization expanded updated alternatives economic globalization released edition book	business	ifg programs alternatives alternatives economic globalization expanded updated alternatives economic globalization released edition book
ucatlas ucsc edu economic economic globalization pages portray aspects economic globalization global connectedness livelihoods production	business	ucatlas ucsc economic economic globalization portray aspects economic globalization global connectedness livelihoods production
foreignpolicy story cms story foreign policy measuring globalization economic reversals index ireland switzerland topped ranking political economic personal technological globalization countries	business	foreignpolicy story cms story foreign policy measuring globalization economic reversals ireland switzerland topped ranking political economic personal technological globalization countries
imf external exr globalization threat opportunity imf issues question arises market economies globalization economic management box	business	imf external exr globalization threat opportunity imf issues question arises market economies globalization economic management box
ilo public english employment strat download esp globalization economic policy employment poverty gender focus study economic globalization social cultural aspects economic globalization growth world trade indisputable	business	ilo public english employment strat download esp globalization economic policy employment poverty gender focus study economic globalization social cultural aspects economic globalization growth trade indisputable
iie publications policy islam globalization economic performance islam globalization economic performance east marcus noland howard pack marcus noland senior fellow	business	iie publications policy islam globalization economic performance islam globalization economic performance east marcus noland howard pack marcus noland senior fellow
investorwords investment investment definition investment definition investment finance purchase financial product item value expectation favorable	business	investorwords investment investment definition investment definition investment finance purchase financial product item expectation favorable
prweek sectors publicsector publicsector news features analysis opinions campaigns north tyneside council hired public sector specialist dtw ‘strategic ethnic communications agency rich visions public sector pros	business	prweek sectors publicsector publicsector news features analysis opinions campaigns north tyneside council hired public sector specialist dtw strategic ethnic communications agency rich visions public sector pros
econlib library enc investment investment alan auerbach concise encyclopedia investment alan auerbach concise encyclopedia economics	business	econlib library enc investment investment alan auerbach concise encyclopedia investment alan auerbach concise encyclopedia economics
thefreedictionary investment investment definition investment online definition investment online dictionary investment investment mean investment synonyms investment antonyms	business	thefreedictionary investment investment definition investment online definition investment online dictionary investment investment investment synonyms investment antonyms
ebxml project teams business process ebxml business process project team deliverables business process project team sub-teams summarized status deliverables specifications	business	ebxml project teams business process ebxml business process project team deliverables business process project team teams summarized status deliverables specifications
sourceforge projects ofbiz sourceforge net apache business project ofbiz apache business project apache ofbiz managed apache software foundation	business	sourceforge projects ofbiz sourceforge net apache business project ofbiz apache business project apache ofbiz managed apache software foundation
amazon business intelligence roadmap decision support applications amazon com business intelligence roadmap project amazon com business intelligence roadmap project lifecycle decision-support applications books larissa moss shaku atre larissa	business	amazon business intelligence roadmap decision support applications amazon business intelligence roadmap project amazon business intelligence roadmap project lifecycle decision support applications books larissa moss shaku atre larissa
jewishgen jri bizdir start jri poland business directory project phase jewish records indexing poland jewishgen polish business directory project access data town	business	jewishgen jri bizdir start jri poland business directory project phase jewish records indexing poland jewishgen polish business directory project access data town
tkk project business research hut abstract pdf kirsi eloranta johanna nummelin exploring role culture relationship building maintaining global project business	business	tkk project business hut abstract pdf kirsi eloranta johanna nummelin exploring role culture relationship building maintaining global project business
wikipedia wiki investment investment wikipedia encyclopedia investment investing closely-related meanings business management finance economics saving deferring	business	wikipedia wiki investment investment wikipedia encyclopedia investment investing closely meanings business management finance economics saving deferring
fidelity welcome fidelity investments mutual fund company provider financial services investment management retirement brokerage services	business	fidelity fidelity investments mutual fund company provider financial services investment management retirement brokerage services
investment suite investment suite financial bets stock market overview discussion market trends investment recommendations jim cramer bob brinker warren buffett suzy orman	business	investment suite investment suite financial bets stock market overview discussion market trends investment recommendations jim cramer bob brinker warren buffett suzy orman
investmenthelper investmenthelper org online investment guide stock mutual funds american investor leonard kragness unveiled investment package mining oil exploration sinoe county	business	investmenthelper investmenthelper org online investment guide stock mutual funds american investor leonard kragness unveiled investment package mining oil exploration sinoe county
investmentu investment advice investment research contrarian investment delivers independent no-nonsense investment advice build long-lasting wealth investment research reports	business	investmentu investment advice investment contrarian investment delivers independent nonsense investment advice build lasting wealth investment reports
answers topic investment investment definition synonyms answers com in·vest·ment act investing invested property possession acquired financial benefit	business	answers topic investment investment definition synonyms answers investing invested property possession acquired financial benefit
edwardjones investing decades building relationships face-to-face interaction adhering strategy recommending quality investments	business	edwardjones investing decades building relationships interaction adhering strategy recommending quality investments
invest faq investment faq home page investment faq concise unbiased guide investments personal finance answers questions	business	invest faq investment faq investment faq concise unbiased guide investments personal finance answers questions
investment center hrblock block investments financial planning online investments block investments financial planning online investments investment advice investment services	business	investment center hrblock block investments financial planning online investments block investments financial planning online investments investment advice investment services
theinvestmentmachine directory investment websites investment machine users agree acknowledge strictly directory websites investments sale	business	theinvestmentmachine directory investment websites investment machine users agree acknowledge strictly directory websites investments sale
cid harvard edu cidtrade issues investment investment comprehensive summary trade issues surrounding investment links trade papers websites investment	business	cid harvard cidtrade issues investment investment comprehensive summary trade issues surrounding investment links trade papers websites investment
amnesty globalization economic globalization human rights amnesty international amnesty international movement people campaign internationally human rights	business	amnesty globalization economic globalization human rights amnesty international amnesty international movement people campaign internationally human rights
pwc extweb industry nsf docid government public services industry sector governments levels international national world operate environment characterized economic	business	pwc extweb industry nsf docid government public services industry sector governments levels international national operate environment characterized economic
osha gov dcsp osp public sector public sector osha regulations cfr permit approved plans plans cover public sector workers	business	osha gov dcsp osp public sector public sector osha regulations cfr permit approved plans plans cover public sector workers
smalltownmarketing promotiondirectory promote business directory business promotion town marketing books tips marketing advertising promotion money saving ideas help business	business	smalltownmarketing promotiondirectory promote business directory business promotion town marketing books tips marketing advertising promotion money saving ideas business
abetteridea promotional items promotional products promotional items help promote business promotional products creative promotional products idea business	business	abetteridea promotional items promotional products promotional items promote business promotional products creative promotional products idea business
tipsbooklets tips booklets business promotion publicity purchase ebooklets advertising marketing promotion ebooklets write edit self publish	business	tipsbooklets tips booklets business promotion publicity purchase ebooklets advertising marketing promotion ebooklets write edit publish
publicrelations businesspromotion products regarding business promotion business promotion reports snag publicity business profitable publicity tips jump-start consulting business	business	publicrelations businesspromotion products business promotion business promotion reports snag publicity business profitable publicity tips jump start consulting business
garrettspecialties logo promotional products promotional gifts imprinted logo promotion items promotional products custom corporate gifts promotional imprinted business gift giveaways marketing products advertising gifts	business	garrettspecialties logo promotional products promotional gifts imprinted logo promotion items promotional products custom corporate gifts promotional imprinted business gift giveaways marketing products advertising gifts
addme addme search engine optimization submission promotion leading resource webmasters small- business owners specialized website submission promotion internet marketing optimization search	business	addme addme search engine optimization submission promotion leading resource webmasters business owners specialized website submission promotion internet marketing optimization search
sbinfocanada about promotio business promotion promotion business promotion low-cost business promotion techniques web promotion collection promotion ideas word	business	sbinfocanada promotio business promotion promotion business promotion low cost business promotion techniques web promotion collection promotion ideas word
promotional items inc promotional items inc promotional products promotional gifts promotional products source business gifts promotional items advertising trade giveaways business promotional items healthcare promotional	business	promotional items promotional items promotional products promotional gifts promotional products source business gifts promotional items advertising trade giveaways business promotional items healthcare promotional
searchengineguide business guide website promotion search search engines covered depth daily search engine news information search engine marketing directory	business	searchengineguide business guide website promotion search search engines covered depth daily search engine news search engine marketing directory
smallbusinessbc bizstart marketresearchpromo business business start-up business promotion idea business services assistance resources running business british columbia vancouver	business	smallbusinessbc bizstart marketresearchpromo business business start business promotion idea business services assistance resources running business british columbia vancouver
ppa promotional products association international ppai ppai study promotional products impact exposure influence survey business travelers dfw airport insight	business	ppa promotional products association international ppai ppai study promotional products impact exposure influence survey business travelers dfw airport insight
huntsdc gov business business promotion business promotion section information business promotion	business	huntsdc gov business business promotion business promotion business promotion
thebest sites search engine friendly business web directory url text link ads advertising website promotion assist help promote seo resources business text link exchange service	business	thebest sites search engine friendly business web directory url text link ads advertising website promotion assist promote seo resources business text link exchange service
musicmoz business promotion musicmoz business promotion indie distribution promotion marketing independent music line prices membership information	business	musicmoz business promotion musicmoz business promotion indie distribution promotion marketing independent music prices membership
articlefeeder display cat online business promotion marketing article feeder online business promotion marketing articles articlefeeder com	business	articlefeeder display cat online business promotion marketing article feeder online business promotion marketing articles articlefeeder
sbinfocanada about marketing bizpromotion business promotion low-cost promote business business promotion doesn expensive effective word business business promotion techniques	business	sbinfocanada marketing bizpromotion business promotion low cost promote business business promotion doesn expensive effective word business business promotion techniques
ctj itep itep home page institute taxation economic policy itep non-profit research focusing federal tax policy	business	ctj itep itep institute taxation economic policy itep profit focusing federal tax policy
iisd economics economics policy instruments governments instruments—including economic instruments pollution taxes subsidies marketable permits	business	iisd economics economics policy instruments governments economic instruments pollution taxes subsidies marketable permits
economic policy economic policy economic policy published blackwell publishers cepr centre economic policy research center economic studies university	business	economic policy economic policy economic policy published blackwell publishers cepr centre economic policy center economic studies university
ustreas gov offices economic policy treasury office economic policy office economic policy responsible analyzing reporting prospective economic developments world economies	business	ustreas gov offices economic policy treasury office economic policy office economic policy responsible analyzing reporting prospective economic developments economies
library okstate edu govdocs browsetopics econpol browse topic economic policy jec task review economic conditions improvements economic policy studies investigates recommendations	business	library okstate govdocs browsetopics econpol browse topic economic policy jec task review economic conditions improvements economic policy studies investigates recommendations
jstor journals jstor economic policy publisher blackwell publishing behalf centre economic policy research center economic studies maison des sciences homme	business	jstor journals jstor economic policy publisher blackwell publishing behalf centre economic policy center economic studies maison des sciences homme
newyorkfed research epr index economic policy review federal reserve bank york policy -oriented journal focusing economic financial market issues review publishes research federal reserve bank york economists	business	newyorkfed epr economic policy review federal reserve bank york policy oriented journal focusing economic financial market issues review publishes federal reserve bank york economists
ejournals ebsco direct journalid economic policy	business	ejournals ebsco direct journalid economic policy
mises etexts ecopol economic policy tomorrow ideal economic policy tomorrow government protect defend domestic foreign aggression	business	mises etexts ecopol economic policy tomorrow ideal economic policy tomorrow government protect defend domestic foreign aggression
globalpolicy socecon index social economic policy global policy forum word bank international monetary fund world trade organization wield tremendous power global social economic policy	business	globalpolicy socecon social economic policy global policy forum word bank international monetary fund trade organization wield tremendous power global social economic policy
epinet content issueguides minwage minimum wage guide economic policy institute guide benefits minimum wage effects faq database news articles	business	epinet content issueguides minwage minimum wage guide economic policy institute guide benefits minimum wage effects faq database news articles
ingenta journals browse bpl ecop economic policy	business	ingenta journals browse bpl ecop economic policy
oxrep oxfordjournals oxford journals social sciences oxford review economic policy general-interest journal full-text articles	business	oxrep oxfordjournals oxford journals social sciences oxford review economic policy journal text articles
newschool edu cepa center economic policy analysis cepa research center economics department school university research macroeconomic policy inequality poverty	business	newschool cepa center economic policy analysis cepa center economics department school university macroeconomic policy inequality poverty
blackwellpublishing journal ref economic policy journal information economic policy journal information contents lists abstracts blackwell publishing website	business	blackwellpublishing journal economic policy journal economic policy journal contents lists abstracts blackwell publishing website
ingentaconnect content bpl ecop ingentaconnect publication economic policy economic policy issn economic policy logo blackwell publishing logo publisher blackwell publishing issues electronically	business	ingentaconnect content bpl ecop ingentaconnect publication economic policy economic policy issn economic policy logo blackwell publishing logo publisher blackwell publishing issues electronically
state gov issues economic trade reports country reports economic policy trade practices	business	gov issues economic trade reports country reports economic policy trade practices
breckland gov businesspromotion business promotion information help assistance businesses business link norfolk website link	business	breckland gov businesspromotion business promotion assistance businesses business link norfolk website link
bizweb articles internet marketing articles business website promotion internet marketing articles website promotion	business	bizweb articles internet marketing articles business website promotion internet marketing articles website promotion
publicityhound index category business promotion publicity hound blog business promotion business promotion archived posts category commenting blogs help journalists personal assistant christie gaderson	business	publicityhound category business promotion publicity hound blog business promotion business promotion archived posts category commenting blogs journalists personal assistant christie gaderson
small business consultants business consulting management consultant internet effective business promotion professional web design web design developed internet marketing functionality mind	business	business consultants business consulting management consultant internet effective business promotion professional web design web design developed internet marketing functionality mind
coreynahman pharmaceutical sales pharmaceutical marketing pharmaceutical pharmaceutical news reliable drug information patients pharmaceutical marketing professionals pharmaceutical sales advice land	business	coreynahman pharmaceutical sales pharmaceutical marketing pharmaceutical pharmaceutical news reliable drug patients pharmaceutical marketing professionals pharmaceutical sales advice land
wikipedia wiki public sector public sector wikipedia encyclopedia public sector economic administrative life deals delivery services government	business	wikipedia wiki public sector public sector wikipedia encyclopedia public sector economic administrative life deals delivery services government
goidirectory gov psujv directory web sites government india department public enterprises fertilizer association india fai pandey committee vigilance efficiency public sector enterprises	business	goidirectory gov psujv directory web sites government india department public enterprises fertilizer association india fai pandey committee vigilance efficiency public sector enterprises
prospects cms showpage home public and voluntary sector eigjlcl public voluntary sector jobs course searches public voluntary sector volunteers sector education health sector regional	business	prospects cms showpage public voluntary sector eigjlcl public voluntary sector jobs searches public voluntary sector volunteers sector education health sector regional
ips insight insight public sector	business	ips insight insight public sector
ischool berkeley edu hal papers linux adoption the public sector linux adoption public sector economic analysis public sectors attractive computing platform preferred public sector officials	business	ischool berkeley hal papers linux adoption public sector linux adoption public sector economic analysis public sectors attractive computing platform preferred public sector officials
opsi gov office public sector information opsi sets standards practical framework encouraging re-use public sector information web-based	business	opsi gov office public sector opsi sets standards practical framework encouraging public sector web based
jobsgopublic jobsgopublic public jobs careers home source job listing profit public sectors	business	jobsgopublic jobsgopublic public jobs careers source job listing profit public sectors
symantec enterprise solutions overview solid public sector public sector symantec assistance key solutions help critical information safe compliant—regardless	business	symantec enterprise solutions overview solid public sector public sector symantec assistance key solutions critical safe
ipsos mori erm index shtml ipsos mori employee surveys research sector enquires craig hartley-kite public sector enquiries silverman	business	ipsos mori erm shtml ipsos mori employee surveys sector enquires craig hartley kite public sector enquiries silverman
aon assoc public sector public sector organizations public sector tighter budgets demand services aon problem-solving expertise technological	business	aon assoc public sector public sector organizations public sector tighter budgets demand services aon solving expertise technological
europa information society policy psi index information society public sector information access re-use european commission directive re-use public sector information european parliament council address barriers	business	europa society policy psi society public sector access european commission directive public sector european parliament council address barriers
juniper solutions public sector index public sector juniper networks juniper networks solutions secure assure interconnected networks help governments communicate	business	juniper solutions public sector public sector juniper networks juniper networks solutions secure assure interconnected networks governments communicate
unpan intradoc groups public documents unpan world public sector report theme unlocking human potential public sector performance par- ticularly pertinent interconnectedness	business	unpan intradoc public documents unpan public sector report theme unlocking human potential public sector performance par ticularly pertinent interconnectedness
unpan statistical database unpan statistical database public sector performance indicator western australia macro economic policies performance bhutan	business	unpan statistical database unpan statistical database public sector performance indicator western australia macro economic policies performance bhutan
cogginsmarketing coggins sales marketing marketing plans training seminars marketing strategy specializing sales training seminars business consulting marketing plans business marketing	business	cogginsmarketing coggins sales marketing marketing plans training seminars marketing strategy specializing sales training seminars business consulting marketing plans business marketing
ourpublicservice ops programs psc partnership public service solving immense tapping america management expertise public sectors incorporate	business	ourpublicservice ops programs psc partnership public service solving immense tapping america management expertise public sectors incorporate
rileyguide sales sales advertising marketing riley guide job seekers review listings category marketing sales sales management events fundraising location	business	rileyguide sales sales advertising marketing riley guide job seekers review listings category marketing sales sales management events fundraising location
smtusa website development web design internet marketing orlando talking…qualified leads sales sales marketing technologies orlando florida helps businesses world	business	smtusa website development web design internet marketing orlando leads sales sales marketing technologies orlando florida helps businesses
bls gov oco ocos advertising marketing promotions public relations sales firms owner chief executive officer assume advertising promotions marketing sales public relations responsibilities	business	bls gov oco ocos advertising marketing promotions public relations sales firms owner chief executive officer assume advertising promotions marketing sales public relations responsibilities
businessknowhow bkhmarketing marketing ideas sales strategies customer service tips marketing ideas sales strategies advertising customer relations tips growing businesses	business	businessknowhow bkhmarketing marketing ideas sales strategies customer service tips marketing ideas sales strategies advertising customer relations tips growing businesses
marketingjobs sales jobs marketing jobs advertising jobs marketingjobs com search professional jobs united jobs sales marketing advertising jobs entry executive level	business	marketingjobs sales jobs marketing jobs advertising jobs marketingjobs search professional jobs united jobs sales marketing advertising jobs entry executive level
sales marketing careerbuilder default sales jobs marketing jobs advertising jobs careerbuilder com sales marketing jobs job search careerbuilder leader job search sites access jobs	business	sales marketing careerbuilder default sales jobs marketing jobs advertising jobs careerbuilder sales marketing jobs job search careerbuilder leader job search sites access jobs
entrepreneur marketing index business marketing business marketing marketing marketing ebay sales internet items visibility off-ebay advertising methods	business	entrepreneur marketing business marketing business marketing marketing marketing ebay sales internet items visibility ebay advertising methods
salesandmarketing sales marketing management articles monthly print magazine resources	business	salesandmarketing sales marketing management articles monthly print magazine resources
allbusiness sales sales tips advice allbusiness com generating sales key business learn online offline marketing customers	business	allbusiness sales sales tips advice allbusiness generating sales key business learn online offline marketing customers
managesmarter msg publications smm manage smarter performance gateway managesmarter sales incentive programs sales marketing management skills elements sales research development data analysis	business	managesmarter msg publications smm manage smarter performance gateway managesmarter sales incentive programs sales marketing management skills elements sales development data analysis
nationjob marketing marketing jobs sales jobs nationjob com careers marketing jobs sales jobs job listings company profiles updated daily	business	nationjob marketing marketing jobs sales jobs nationjob careers marketing jobs sales jobs job listings company profiles updated daily
forbes entrepreneurs salesmarketing sales marketing news information entrepreneurs entrepreneurs sales marketing advice information growing sales marketing business forbes com	business	forbes entrepreneurs salesmarketing sales marketing news entrepreneurs entrepreneurs sales marketing advice growing sales marketing business forbes
magportal bus mktg magazine articles marketing sales magazine articles marketing advertising sales	business	magportal bus mktg magazine articles marketing sales magazine articles marketing advertising sales
asmnet sales marketing welcome sales marketing llc asm country leading sales marketing agencies specializing outsourced sales	business	asmnet sales marketing sales marketing llc asm country leading sales marketing agencies specializing outsourced sales
smei sales marketing executives international smei professional community sales marketing professionals establish professional standards identification	business	smei sales marketing executives international smei professional community sales marketing professionals establish professional standards identification
startupjournal howto marketingsales startupjournal marketing sales winning sales customer testimonials sarah needleman practical marketing tips entrepreneurs sarah needleman	business	startupjournal howto marketingsales startupjournal marketing sales winning sales customer testimonials sarah needleman practical marketing tips entrepreneurs sarah needleman
job hunt marketing shtml job-hunt org marketing sales jobs job search career jobs sales search jobs keywords location category advertising marketing retail merchandisint sales job class contract	business	job hunt marketing shtml job hunt org marketing sales jobs job search career jobs sales search jobs keywords location category advertising marketing retail merchandisint sales job class contract
softwareceo softwareceo software marketing software sales software softwareceo web portal software entrepreneurs executives links industry expert news advice research resources seminars	business	softwareceo softwareceo software marketing software sales software softwareceo web portal software entrepreneurs executives links industry expert news advice resources seminars
oecd document oecd handbook economic globalisation indicators led handbook economic globalisation indicators outcome co-operation experts oecd secretariat	business	oecd document oecd handbook economic globalisation indicators led handbook economic globalisation indicators outcome operation experts oecd secretariat
gep gep leverhulme centre research globalisation economic leverhulme centre research globalisation economic policy established school economics centre core funding	business	gep gep leverhulme centre globalisation economic leverhulme centre globalisation economic policy established school economics centre core funding
warc globalization economic life covenanting justice economy earth church process world alliance reformed churches warc warc international	business	warc globalization economic life covenanting justice economy earth church process alliance reformed churches warc warc international
answers topic trade trade definition synonyms answers com trade business buying selling commodities commerce synonyms business people business	business	answers topic trade trade definition synonyms answers trade business buying selling commodities commerce synonyms business people business
worldbank trade welcome worldbank economically integrated world trade matters trade economic partnership agreements preferential access	business	worldbank trade worldbank economically integrated trade matters trade economic partnership agreements preferential access
google top society issues economic international trade google directory society issues economic international trade independent quasi-judicial federal agency trade policy advice legislative executive branches government	business	google top society issues economic international trade google directory society issues economic international trade independent quasi judicial federal agency trade policy advice legislative executive branches government
scottrade online discount brokers online stock trading stock investing scottrade discount brokers investment services stocks options mutual funds treasury bonds retirement accounts flat commissions	business	scottrade online discount brokers online stock trading stock investing scottrade discount brokers investment services stocks options mutual funds treasury bonds retirement accounts flat commissions
dlc ndol sub kaid subid democratic leadership council energy environment trade trade finding effective deal legitimate issues skeptics crafting domestic policy	business	dlc ndol kaid subid democratic leadership council energy environment trade trade finding effective deal legitimate issues skeptics crafting domestic policy
canada etrade trade canada online trading investing extraordinary trade canada delivers innovative trading investing solutions self-directed consumer	business	canada etrade trade canada online trading investing extraordinary trade canada delivers innovative trading investing solutions directed consumer
imdb title trade attended screening trade santa international film festival films disappointing	business	imdb title trade attended screening trade santa international film festival films disappointing
ucblibraries colorado edu govpubs trade ucb libraries govpubs trade information guide trade government publications library covers international nongovernmental	business	ucblibraries colorado govpubs trade ucb libraries govpubs trade guide trade government publications library covers international nongovernmental
https etrade home openanaccount trade financial home wait secure online applications trading investing bank account apply low-cost mortgage	business	https etrade openanaccount trade financial wait secure online applications trading investing bank account apply low cost mortgage
simple wikipedia wiki trade trade english wikipedia encyclopedia trade willingly services services	business	simple wikipedia wiki trade trade english wikipedia encyclopedia trade willingly services services
nobelprize educational games economics trade trade bertil ohlin awarded prize economics countries engage benefit trade production resources	business	nobelprize educational games economics trade trade bertil ohlin awarded prize economics countries engage benefit trade production resources
dir yahoo business and economy trade trade business economy yahoo directory yahoo reviewed sites business economy trade	business	dir yahoo business economy trade trade business economy yahoo directory yahoo reviewed sites business economy trade
wikipedia wiki banking bank wikipedia encyclopedia branch banking centre financial centre retail location banks activities retail banking	business	wikipedia wiki banking bank wikipedia encyclopedia branch banking centre financial centre retail location banks activities retail banking
bls gov oco cgs banking wage salary employment banking projected percent period percent growth wage salary	business	bls gov oco cgs banking wage salary employment banking projected percent period percent growth wage salary
dmoz society issues economic international trade directory society issues economic international trade almanac policy issues international trade news background information links international trade issues gatt nafta wto	business	dmoz society issues economic international trade directory society issues economic international trade almanac policy issues international trade news background links international trade issues gatt nafta wto
youthink worldbank issues trade youthink issues trade countries world world trade organization wto wto discuss liberalize international	business	youthink worldbank issues trade youthink issues trade countries trade organization wto wto liberalize international
tradezone import export trade leads global trade business opportunity mellinger import export business opportunity global trade leads services suppliers manufactures directory importers exporters	business	tradezone import export trade leads global trade business opportunity mellinger import export business opportunity global trade leads services suppliers manufactures directory importers exporters
trade gov trade gov information federal government export assistance programs export counseling country regional market information	business	trade gov trade gov federal government export assistance programs export counseling country regional market
ecodevdirectory economic development directory directory economic development agency web sites listed geographical location	business	ecodevdirectory economic development directory directory economic development agency web sites listed geographical location
cepa newschool edu het schools develop economic development lay people economic development mean analysis economic progress nations economics designed	business	cepa newschool het schools develop economic development lay people economic development analysis economic progress nations economics designed
medc michigan michigan economic development corporation michigan agency location assistance financing growing companies	business	medc michigan michigan economic development corporation michigan agency location assistance financing growing companies
thinkkentucky home kentucky cabinet economic development information programs services designed assist educate business	business	thinkkentucky kentucky cabinet economic development programs services designed assist educate business
expand nevada nevada commission economic development meeting nevada commission economic development slated	business	expand nevada nevada commission economic development meeting nevada commission economic development slated
assist neded nebraska department economic development department nebraska right-in-the-middle-of-it-all endless array living business wonderful	business	assist neded nebraska department economic development department nebraska middle endless array living business wonderful
lib lsu edu bus econdev lsu libraries business subject guides hampshire department resources economic development compendium economic development resources arkansas	business	lib lsu bus econdev lsu libraries business subject guides hampshire department resources economic development compendium economic development resources arkansas
library okstate edu govdocs browsetopics econdev browse topic economic development rural development agencies department agriculture economic development assistance communities	business	library okstate govdocs browsetopics econdev browse topic economic development rural development agencies department agriculture economic development assistance communities
econ oregon gov oregon oregon economic community development department oregon economic community development department oregon economy community profiles economic data governor economic dev vision	business	econ oregon gov oregon oregon economic community development department oregon economic community development department oregon economy community profiles economic data governor economic dev vision
state econ housing economic development welcome executive office economic development business community help attract jobs	business	econ housing economic development executive office economic development business community attract jobs
enaplesflorida economic development council collier county information expanding businesses localities collier county	business	enaplesflorida economic development council collier county expanding businesses localities collier county
wikipedia wiki trade trade wikipedia encyclopedia trade voluntary exchange services trade commerce mechanism trade market	business	wikipedia wiki trade trade wikipedia encyclopedia trade voluntary exchange services trade commerce mechanism trade market
wikipedia wiki international trade international trade wikipedia encyclopedia international trade exchange services international boundaries territories countries	business	wikipedia wiki international trade international trade wikipedia encyclopedia international trade exchange services international boundaries territories countries
tradethemovie trade movie website trade movie website	business	tradethemovie trade movie website trade movie website
https etrade home welcome trade financial trade easy-to-use tools technology help maximize potential value assets-from trading investing banking	business	https etrade trade financial trade easy tools technology maximize potential assets trading investing banking
moneycentral msn banking home banking online tools services msn money banking manage banking online tools banking services rates mortgages loans savings accounts	business	moneycentral msn banking banking online tools services msn money banking manage banking online tools banking services rates mortgages loans savings accounts
finance yahoo banking budgeting banking budgeting articles calculators tools advice banking budgeting articles calculators tools advice yahoo personal finance	business	finance yahoo banking budgeting banking budgeting articles calculators tools advice banking budgeting articles calculators tools advice yahoo personal finance
law cornell edu topics banking banking wex bearing banking activities articles uniform commercial code deal funds transfers letters credit	business	law cornell topics banking banking wex bearing banking activities articles uniform commercial code deal funds transfers letters credit
banking welcome digital insight	business	banking digital insight
marketwatch markets stock market news bond market news currencies market news bond market news marketwatch stock market news currencies market news	business	marketwatch markets stock market news bond market news currencies market news bond market news marketwatch stock market news currencies market news
bloomberg news markets bonds bloomberg com bonds san antonio north east independent school district led government borrowers billion bond market	business	bloomberg news markets bonds bloomberg bonds san antonio north east independent school district led government borrowers billion bond market
moneycentral msn investor market home investing market summary msn money concise view financial market happenings market commentary breaking news headlines indexes	business	moneycentral msn investor market investing market summary msn money concise view financial market happenings market commentary breaking news headlines indexes
thestreet markets markets news stocks energy commodities currencies bonds financial market news stock market report analysis commentary nasdaq stock market standard poors dow	business	thestreet markets markets news stocks energy commodities currencies bonds financial market news stock market report analysis commentary nasdaq stock market standard poors dow
businessweek investor markets stock markets stock market indices businessweek updates stock market stock market headlines stock exchange updated investing information	business	businessweek investor markets stock markets stock market indices businessweek updates stock market stock market headlines stock exchange updated investing
today reuters investing marketshome stock market news stock quotes investing markets options reuters com source stock market news stock quotes investing markets options reuters leading global provider news	business	reuters investing marketshome stock market news stock quotes investing markets options reuters source stock market news stock quotes investing markets options reuters leading global provider news
markets usatoday custom usatoday markets markets	business	markets usatoday custom usatoday markets markets
finance yahoo yahoo finance stock quotes market news mortgage rates yahoo finance stock quotes news portfolio management resources international market data message boards mortgage rates	business	finance yahoo yahoo finance stock quotes market news mortgage rates yahoo finance stock quotes news portfolio management resources international market data message boards mortgage rates
bloomberg markets index bloomberg com market data indicated intraday data minutes delayed mutual fund navs updated market prices	business	bloomberg markets bloomberg market data intraday data minutes delayed mutual fund navs updated market prices
chron business markets stock market news prices chron com houston chronicle stock market mutual fund news quotes prices build stock portfolio	business	chron business markets stock market news prices chron houston chronicle stock market mutual fund news quotes prices build stock portfolio
investing businessweek research markets overview overview world stock markets stock index performance businessweek breaking news stock markets world information indices stock exchanges investing decisions	business	investing businessweek markets overview overview stock markets stock performance businessweek breaking news stock markets indices stock exchanges investing decisions
camdenlock camden markets london guide visitors market maps photos links traders	business	camdenlock camden markets london guide visitors market maps photos links traders
economist markets markets data economist com financial economic indicators economies markets	business	economist markets markets data economist financial economic indicators economies markets
online barrons markets mod markets barron online	business	online barrons markets mod markets barron online
online wsj markets mod blog oil topnav markets wsj com	business	online wsj markets mod blog oil topnav markets wsj
nasdaq nasdaq stock market market security information nasdaq counter stock exchange portfolio tracking ipo information	business	nasdaq nasdaq stock market market security nasdaq counter stock exchange portfolio tracking ipo
edd state mexico economic development business information mexico divisions trade space commercialization film housing border development economic development	business	edd mexico economic development business mexico divisions trade space commercialization film housing border development economic development
wikipedia wiki market market wikipedia encyclopedia market social arrangement buyers sellers discover information carry voluntary exchange services	business	wikipedia wiki market market wikipedia encyclopedia market social arrangement buyers sellers discover carry voluntary exchange services
forbes markets stock market news stock quotes world markets forbes com stock market news market news headlines forbes com	business	forbes markets stock market news stock quotes markets forbes stock market news market news headlines forbes
money aol banking banking aol money finance learn banking basics online banking banking tools information bank rates	business	money aol banking banking aol money finance learn banking basics online banking banking tools bank rates
topix business banking banking news topix banking news continually updated net	business	topix business banking banking news topix banking news continually updated net
banking senate gov senate committee banking housing urban affairs committee jurisdiction banking economic policy financial institutions price controls deposit insurance economic stabilization defense	business	banking senate gov senate committee banking housing urban affairs committee jurisdiction banking economic policy financial institutions price controls deposit insurance economic stabilization defense
business directory financial services banking banking information business com listing banks international region resources bankers	business	business directory financial services banking banking business listing banks international region resources bankers
banking state pennsylvania department banking ensure safety soundness state-chartered deposit-taking institutions	business	banking pennsylvania department banking ensure safety soundness chartered deposit institutions
money msn banking rates savings accounts accounts compare isas online tools banking resource financial news banking budgeting articles calculators tools advice msn money	business	money msn banking rates savings accounts accounts compare isas online tools banking resource financial news banking budgeting articles calculators tools advice msn money
banking finance careerbuilder banking jobs finance jobs careerbuilder com banking finance jobs job search careerbuilder leader job search sites access jobs	business	banking finance careerbuilder banking jobs finance jobs careerbuilder banking finance jobs job search careerbuilder leader job search sites access jobs
ipl div subject browse bus internet public library banking senate committee banking housing urban affairs http banking senate gov committee monitors legislation banks	business	ipl div subject browse bus internet public library banking senate committee banking housing urban affairs http banking senate gov committee monitors legislation banks
careers finance careers finance investment banking overview firms sales trading owners securities investment banking issuers securities firms	business	careers finance careers finance investment banking overview firms sales trading owners securities investment banking issuers securities firms
banking state texas department banking homepage charters licenses regulates financial providers texas ensure texas safe sound financial services system	business	banking texas department banking homepage charters licenses regulates financial providers texas ensure texas safe sound financial services system
bis statistics bankstats locational banking statistics bis publications statistics locational banking statistics	business	bis statistics bankstats locational banking statistics bis publications statistics locational banking statistics
gov dob connecticut department banking department banking constitution plaza hartford phone greetings howard pitkin banking commissioner	business	gov dob connecticut department banking department banking constitution plaza hartford phone howard pitkin banking commissioner
dir yahoo business and economy finance and investment banking banking information yahoo directory information central banking development banks organizations government agencies	business	dir yahoo business economy finance investment banking banking yahoo directory central banking development banks organizations government agencies
banking state banking department regulator state-licensed state-chartered financial entities financial institutions operating york	business	banking banking department regulator licensed chartered financial entities financial institutions operating york
money cnn markets dow nasdaq stock market data cnnmoney com financial market coverage breaking news analysis stock quotes hours market data research earnings	business	money cnn markets dow nasdaq stock market data cnnmoney financial market coverage breaking news analysis stock quotes hours market data earnings
markets financial markets news com markets news financial stock data financial commentary investor analysis com	business	markets financial markets news markets news financial stock data financial commentary investor analysis
abq albuquerque economic development albuquerque economic development recruiting business albuquerque metro helping albuquerque business expand	business	abq albuquerque economic development albuquerque economic development recruiting business albuquerque metro helping albuquerque business expand
ded gov missouri department economic development on-line resource missouri economic government information assistance	business	ded gov missouri department economic development resource missouri economic government assistance
ced ced home committee economic development independent ced independent non-profit nonpartisan public policy organization comprised business academic leaders dedicated researching	business	ced ced committee economic development independent ced independent profit nonpartisan public policy organization comprised business academic leaders dedicated researching
business directory management management consulting business management business com management consulting resources information business management professionals	business	business directory management management consulting business management business management consulting resources business management professionals
intute socialsciences business intute social sciences business intute business management access quality resources internet resource evaluated categorised subject	business	intute socialsciences business intute social sciences business intute business management access quality resources internet resource evaluated categorised subject
smbiz business taxes management professional tax management guidance medium-sized businesses	business	smbiz business taxes management professional tax management guidance medium sized businesses
bpmi business process management initiative business process management initiative standardize management business processes span applications corporate departments	business	bpmi business process management initiative business process management initiative standardize management business processes span applications corporate departments
cfap afs temp topicid business management sound business management cornerstore farm enterprise selling products services	business	cfap afs temp topicid business management sound business management cornerstore farm enterprise selling products services
rbma radiology business management association rbma rbma resources radiology professionals leading edge rbma exceptional educational programs education	business	rbma radiology business management association rbma rbma resources radiology professionals leading edge rbma exceptional educational programs education
management about begintomanage blglossary business management glossary glossary business management dictionary management reh guide management	business	management begintomanage blglossary business management glossary glossary business management dictionary management reh guide management
nahb category sectionid construction software construction business management tools construction software construction business management tools construction industry business mgmt	business	nahb category sectionid construction software construction business management tools construction software construction business management tools construction industry business mgmt
wikipedia wiki master business administration master business administration wikipedia encyclopedia article overview master business administration degree	business	wikipedia wiki master business administration master business administration wikipedia encyclopedia article overview master business administration degree
wikipedia wiki management management wikipedia encyclopedia habit management business administration management commerce	business	wikipedia wiki management management wikipedia encyclopedia habit management business administration management commerce
sba gov united business administration electronic gateway procurement information businesses search engine contracting officers marketing tool firms	business	sba gov united business administration electronic gateway procurement businesses search engine contracting officers marketing tool firms
sba gov smallbusinessplanner index sba business plan basics business plan tutorial outline business administration	business	sba gov smallbusinessplanner sba business plan basics business plan tutorial outline business administration
cba unl edu cba college business administration mission college business administration foster intellectual curiosity business insight effective leadership quality	business	cba unl cba college business administration mission college business administration foster intellectual curiosity business insight effective leadership quality
cba neu edu northeastern college business administration business administration international business programs	business	cba neu northeastern college business administration business administration international business programs
academicinfo bus business resources business administration academic info directory internet resources business business administration	business	academicinfo bus business resources business administration academic info directory internet resources business business administration
dmoz business management directory business management directory business management business management business business services consulting	business	dmoz business management directory business management directory business management business management business business services consulting
bus utk edu college business administration university tennessee college business administration students faculty undergraduate majors masters programs	business	bus utk college business administration university tennessee college business administration students faculty undergraduate majors masters programs
sibm edu sibm symbiosis institute business management postgraduate courses management information courses campus recruitments alumni	business	sibm sibm symbiosis institute business management postgraduate courses management courses campus recruitments alumni
businessweek smallbiz business management information businessweek information business startups entrepreneurs helpful resources business management financing marketing technology	business	businessweek smallbiz business management businessweek business startups entrepreneurs helpful resources business management financing marketing technology
counterpunch vidal matt vidal globalization economic inequality integration economic activities national borders globalization effected economic actors	business	counterpunch vidal matt vidal globalization economic inequality integration economic activities national borders globalization effected economic actors
inpeg ecn frames english index initiative economic globalisation prague inpeg initiative economic globalisation inpeg initiative economic globalisation http inpeg ecn http www inpeg org	business	inpeg ecn frames english initiative economic globalisation prague inpeg initiative economic globalisation inpeg initiative economic globalisation http inpeg ecn http inpeg org
amazon alternatives economic globalization john cavanagh amazon com alternatives economic globalization books amazon com alternatives economic globalization books cavanagh jerry mander sarah debi barker maude barlow walden bello robin tony	business	amazon alternatives economic globalization john cavanagh amazon alternatives economic globalization books amazon alternatives economic globalization books cavanagh jerry mander sarah debi barker maude barlow walden bello robin tony
rcgfrfi easynet marxism articles glob politics economics globalisation globalisation economic event era governments technology globalisation feasible	business	rcgfrfi easynet marxism articles glob politics economics globalisation globalisation economic event era governments technology globalisation feasible
wcc coe wcc what jpc globalization globalization globalized communications critique economic globalization wcc staff rogate mshana interviewed internet radio broadcaster world	business	wcc coe wcc jpc globalization globalization globalized communications critique economic globalization wcc staff rogate mshana interviewed internet radio broadcaster
panix jimcook globalization corporate economic globalization information corporate economic globalization restructuring historically event industrial	business	panix jimcook globalization corporate economic globalization corporate economic globalization restructuring historically event industrial
sweatshopwatch index sweatshop watch globalization economic justice project globalization economic justice project garment workers advocates trade policies impact	business	sweatshopwatch sweatshop watch globalization economic justice project globalization economic justice project garment workers advocates trade policies impact
entrepreneur management index business management advice guides online guide business management articles advice how-to guides	business	entrepreneur management business management advice guides online guide business management articles advice guides
wikipedia wiki management management wikipedia encyclopedia habit management business administration management commerce	business	wikipedia wiki management management wikipedia encyclopedia habit management business administration management commerce
wikipedia wiki business process management business process management wikipedia encyclopedia business process management bpm field knowledge intersection management information technology encompassing methods	business	wikipedia wiki business process management business process management wikipedia encyclopedia business process management bpm field knowledge intersection management technology encompassing methods
bettermanagement business management leadership decision strategies business management articles webcasts online learning books conferences focused leadership decision	business	bettermanagement business management leadership decision strategies business management articles webcasts online learning books conferences focused leadership decision
management about management business management people management exploring management helping managers experienced managers	business	management management business management people management exploring management helping managers experienced managers
bls gov oco oco management business financial operations occupations management business financial operations occupations management occupations administrative services managers advertising marketing promotions	business	bls gov oco oco management business financial operations occupations management business financial operations occupations management occupations administrative services managers advertising marketing promotions
suggest business business management internet business business business marketing internet business business business social advices sharing website business powered users	business	business business management internet business business business marketing internet business business business social advices sharing website business powered users
ioma institute management administration articles aspects business management manage department handle employer employee relationships	business	ioma institute management administration articles aspects business management manage department handle employer employee relationships
uncwil edu stuaff career majors management university north carolina wilmington career center business job finder http www careers-in- business com executive management job http www nationjob com management job web http www jobweb org	business	uncwil stuaff career majors management university north carolina wilmington career center business job finder http careers business executive management job http nationjob management job web http jobweb org
empmag electronics manufacturing procurement homepage electronics manufacturing procurement magazine procrement power products production essentials data management	business	empmag electronics manufacturing procurement homepage electronics manufacturing procurement magazine procrement power products production essentials data management
sba pdx edu psu school business administration portland university school business administration home mba master business administration program	business	sba pdx psu school business administration portland university school business administration mba master business administration program
coba usf edu usf college business usf college business administration quality programs preparing students contribute leading positions business	business	coba usf usf college business usf college business administration quality programs preparing students contribute leading positions business
content monster getthejob industry home monster human resources interview resume salary advice job effective resume writing interview skills salary negotiation monster getting job	business	content monster getthejob industry monster human resources interview resume salary advice job effective resume writing interview skills salary negotiation monster job
hrvillage human resources portal human resource management human resources articles discussing trends human resource management development hrvillage home professional	business	hrvillage human resources portal human resource management human resources articles discussing trends human resource management development hrvillage professional
blr human resources management website blr com labor laws human resources management compliance training plain english	business	blr human resources management website blr labor laws human resources management compliance training plain english
topix business human resources human resource news topix human resources news continually updated net	business	topix business human resources human resource news topix human resources news continually updated net
shrm hrmagazine shrm focus planning retention job satisfiers employees guideposts retention strategies lockwood	business	shrm hrmagazine shrm focus planning retention job satisfiers employees guideposts retention strategies lockwood
inc resources recruiting managing human resources business human resources managing human resources human resource development human resources resource center inc com	business	resources recruiting managing human resources business human resources managing human resources human resource development human resources resource center
hrdiv human resources division attention doctoral students doctoral student consortium news archive academy awards call division nominations	business	hrdiv human resources division attention doctoral students doctoral student consortium news archive academy awards call division nominations
knowledge wharton upenn edu category cid human resources research knowledge wharton hit confirms satire studies demonstrated romances shape office life human resource departments don	business	knowledge wharton upenn category cid human resources knowledge wharton hit confirms satire studies demonstrated romances shape office life human resource departments don
nolo resource catid bad human resources resource center information hire employees contractors personnel policies benefits fire safely legally	business	nolo resource catid bad human resources resource center hire employees contractors personnel policies benefits fire safely legally
scu edu santa clara university human resources department human resources services benefits administration compensation learning opportunities	business	scu santa clara university human resources department human resources services benefits administration compensation learning opportunities
wikipedia wiki economic development economic development wikipedia encyclopedia economic development development economic wealth countries regions inhabitants legal institutional	business	wikipedia wiki economic development economic development wikipedia encyclopedia economic development development economic wealth countries regions inhabitants legal institutional
eda gov economic development administration established public economic development act generate jobs help jobs stimulate industrial commercial	business	eda gov economic development administration established public economic development generate jobs jobs stimulate industrial commercial
hud gov economicdevelopment index economic development hud department housing urban development internet website economic development programs job training programs apply	business	hud gov economicdevelopment economic development hud department housing urban development internet website economic development programs job training programs apply
iedconline international economic development council international economic development council iedc dedicated helping economic development professionals quality life	business	iedconline international economic development council international economic development council iedc dedicated helping economic development professionals quality life
lded state louisiana louisiana economic development home louisiana agency charged attracting business industry louisiana economic development services resident	business	lded louisiana louisiana economic development louisiana agency charged attracting business industry louisiana economic development services resident
humanresources national human resources association home national human resources assoc focused advancing development professionals connect excel lead nhra	business	humanresources national human resources association national human resources assoc focused advancing development professionals connect excel lead nhra
cba state edu college business administration college business administration cba logo association advance collegiate schools business copyright kansas university	business	cba college business administration college business administration cba logo association advance collegiate schools business copyright kansas university
bls gov oco ocos human resources training labor relations managers entry-level jobs employers college graduates majored human resources human resources administration industrial	business	bls gov oco ocos human resources training labor relations managers entry level jobs employers college graduates majored human resources human resources administration industrial
forbes entrepreneurs humanresources human resources news information entrepreneurs entrepreneurs human resources advice information hiring staffing business forbes com	business	forbes entrepreneurs humanresources human resources news entrepreneurs entrepreneurs human resources advice hiring staffing business forbes
smeal psu edu penn smeal college business penn smeal college smeal focus connect organizations resources thrive dynamic business environment	business	smeal psu penn smeal college business penn smeal college smeal focus connect organizations resources thrive dynamic business environment
ipl div subject browse bus internet public library business administration management business administration management theories organizing running maintaining enterprises people goal	business	ipl div subject browse bus internet public library business administration management business administration management theories organizing running maintaining enterprises people goal
sba oakland edu oakland university school business administration oakland university school business administration premier business school south east michigan	business	sba oakland oakland university school business administration oakland university school business administration premier business school south east michigan
bauer edu bauer college business welcome bauer college business web bachelors business administration masters business administration masters program	business	bauer bauer college business bauer college business web bachelors business administration masters business administration masters program
devry edu programs business administration about business administration degree information overview devry business administration degree overview program objectives students devry business administration program	business	devry programs business administration business administration degree overview devry business administration degree overview program objectives students devry business administration program
hbs edu harvard business school information mba phd education programs	business	hbs harvard business school mba phd education programs
uic edu cba uic college business administration home cba links alumni applying cba blackboard career services cba events students financial aid prospective students	business	uic cba uic college business administration cba links alumni applying cba blackboard career services cba events students financial aid prospective students
bus ucf edu college business administration quality business education accordance university mission intellectual leadership teaching research	business	bus ucf college business administration quality business education university mission intellectual leadership teaching
business kent edu college business administration business degree programs kent college business administration degree programs management finance degrees	business	business kent college business administration business degree programs kent college business administration degree programs management finance degrees
com human resources community knowledge expertise covers employee compensation management organizational development	business	human resources community knowledge expertise covers employee compensation management organizational development
wikipedia wiki human resources human resources wikipedia encyclopedia article human resources applies business labor economies information french film human resources	business	wikipedia wiki human resources human resources wikipedia encyclopedia article human resources applies business labor economies french film human resources
humanresources about human resources business management development jobs consulting human resources business management information development jobs software consulting training policy procedures job descriptions	business	humanresources human resources business management development jobs consulting human resources business management development jobs software consulting training policy procedures job descriptions
human resources careerbuilder jobs careerbuilder com human resources jobs job search careerbuilder leader job search sites access jobs	business	human resources careerbuilder jobs careerbuilder human resources jobs job search careerbuilder leader job search sites access jobs
shrm society human resource management advances human resource profession ensure partner developing executing organizational strategy	business	shrm society human resource management advances human resource profession ensure partner developing executing organizational strategy
guide human resources internet guide directory sites human resources professionals students	business	guide human resources internet guide directory sites human resources professionals students
managementhelp mgmnt mgmnt human resources management human resources management hrm function activities key deciding staffing	business	managementhelp mgmnt mgmnt human resources management human resources management hrm function activities key deciding staffing
manufacture manufacturer directory directory china taiwan products manufacturers directory- taiwan china products manufacturer direcory exporter directory supplier directory suppliers	business	manufacture manufacturer directory directory china taiwan products manufacturers directory taiwan china products manufacturer direcory exporter directory supplier directory suppliers
finance yahoo currency converter currency converter currency convertor currencies yahoo currency converter yahoo finance international currency convertor currency exchange rates convert	business	finance yahoo currency converter currency converter currency convertor currencies yahoo currency converter yahoo finance international currency convertor currency exchange rates convert
imnewswatch archives european media european media consumption consumer survey jupiterresearch released research report european media consumption consumer survey understanding impact	business	imnewswatch archives european media european media consumption consumer survey jupiterresearch released report european media consumption consumer survey understanding impact
irs gov efile article electronic federal tax payment system eftps eftps tax payment system department treasury pay federal taxes electronically on-line phone	business	irs gov efile article electronic federal tax payment system eftps eftps tax payment system department treasury pay federal taxes electronically phone
irs gov efile article electronic payment options electronic payment options safe secure methods paying taxes user fees taxpayers authorize electronic funds withdrawal	business	irs gov efile article electronic payment options electronic payment options safe secure methods paying taxes user fees taxpayers authorize electronic funds withdrawal
eftps gov welcome eftps online electronic federal tax payment system eftps logo links home page treasury logo tax payment regardless eftps-online	business	eftps gov eftps online electronic federal tax payment system eftps logo links treasury logo tax payment eftps online
https secure kagi cgi bin webobjects payment status	business	https secure kagi cgi bin webobjects payment status
mobilepaymentforum home mobile payment forum mobile payment forum global cross-industry alliance leading organizations wireless financial industries dedicated	business	mobilepaymentforum mobile payment forum mobile payment forum global cross industry alliance leading organizations wireless financial industries dedicated
gibill gov bill info rates education benefit payment rates department veterans education benefit payment rates montgomery bill duty mgib-ad chapter rates effective rates effective	business	gibill gov bill info rates education benefit payment rates department veterans education benefit payment rates montgomery bill duty mgib ad chapter rates effective rates effective
verisign verisign security ssl certificate communications verisign operates intelligent infrastructure services protect billions interactions worlds voice data networks	business	verisign verisign security ssl certificate communications verisign operates intelligent infrastructure services protect billions interactions worlds voice data networks
heartlandpaymentsystems heartland payment systems independent payment processor credit debit card processing payroll processing offices usa	business	heartlandpaymentsystems heartland payment systems independent payment processor credit debit card processing payroll processing offices usa
https paypal cgi bin webscr cmd pro overview outside credit card processing credit card services paypal credit card processing paypal website payments pro learn website payments pro email contact sales rep	business	https paypal cgi bin webscr cmd pro overview credit card processing credit card services paypal credit card processing paypal website payments pro learn website payments pro email contact sales rep
medpac gov medpac home comment letter cms rule medicare program prospective payment system consolidated billing skilled nursing facilities	business	medpac gov medpac comment letter cms rule medicare program prospective payment system consolidated billing skilled nursing facilities
amazon help customer display nodeid amazon com help payment pricing promotions grocery purchases apply manufacturer coupons food stamps payment method listed	business	amazon customer display nodeid amazon payment pricing promotions grocery purchases apply manufacturer coupons food stamps payment method listed
mercurypay mercury payment systems mercury payment systems founded merchants ultra-fast credit card transaction processing cost	business	mercurypay mercury payment systems mercury payment systems founded merchants ultra fast credit card transaction processing cost
auctionbytes cab pages payment payment auctionbytes com internet premiere resource online auction users	business	auctionbytes cab payment payment auctionbytes internet premiere resource online auction users
officialpayments payments corp payments corporation leading provider electronic payment options government entities consumers pay government fees	business	officialpayments payments corp payments corporation leading provider electronic payment options government entities consumers pay government fees
https paypal cgi bin webscr cmd standard overview outside credit card credit cards paypal credit cards paypal payments website customers don paypal account credit card payment	business	https paypal cgi bin webscr cmd standard overview credit card credit cards paypal credit cards paypal payments website customers don paypal account credit card payment
pages ebay help policies accepted payments policy payments policy	business	ebay policies accepted payments policy payments policy
wikipedia wiki payment gateway payment gateway wikipedia encyclopedia payment gateway e-commerce application service provider service authorizes payments e-businesses online retailers bricks clicks	business	wikipedia wiki payment gateway payment gateway wikipedia encyclopedia payment gateway commerce application service provider service authorizes payments businesses online retailers bricks clicks
cars advice financing calc loancalc auto loan car finance calculator monthly payment vehicle price payment rate trade-in value	business	cars advice financing calc loancalc auto loan car finance calculator monthly payment vehicle price payment rate trade
washingtonpost dyn content realestate hpid bottomnav washingtonpost com washington estate maryland learn washington estate washington buy sell estate washington washington apartments washington	business	washingtonpost dyn content realestate hpid bottomnav washingtonpost washington estate maryland learn washington estate washington buy sell estate washington washington apartments washington
forbes lifestyle realestate luxury estate news features forbes com luxury estate news features forbes com core topics estate mansions condos ops oceanfront realty homes	business	forbes lifestyle realestate luxury estate news features forbes luxury estate news features forbes core topics estate mansions condos ops oceanfront realty homes
boston realestate estate boston com boston estate search boston globe boston com massachusetts estate boston condos land sale vacation rentals	business	boston realestate estate boston boston estate search boston globe boston massachusetts estate boston condos land sale vacation rentals
century century estate agency franchised offices united canada europe latin america east asia offices agents	business	century century estate agency franchised offices united canada europe latin america east asia offices agents
realestatewebmasters estate web design realtor websites estate agents estate webmasters specializes custom search engine friendly estate website design search engine optimization seo	business	realestatewebmasters estate web design realtor websites estate agents estate webmasters specializes custom search engine friendly estate website design search engine optimization seo
money cnn real estate estate news prices mortgages calculators cnnmoney mortgages refinancing home tips cnnmoney com calculators refinancing mortgage payments	business	money cnn real estate estate news prices mortgages calculators cnnmoney mortgages refinancing tips cnnmoney calculators refinancing mortgage payments
realestate msn msn estate home buying selling tips mls listings rentals msn estate buy home market share predictions estate message board	business	realestate msn msn estate buying selling tips mls listings rentals msn estate buy market share predictions estate message board
sfgate homes san francisco chronicle estate chronicle examiner homes sale estate classifieds	business	sfgate homes san francisco chronicle estate chronicle examiner homes sale estate classifieds
realestate estate homes sale houses sale realestate realestate estate services home listings homes sale realtors agents brokers house listings	business	realestate estate homes sale houses sale realestate realestate estate services listings homes sale realtors agents brokers house listings
nytimes pages realestate index estate buy sell rent home york online estate listings properties york nationwide	business	nytimes realestate estate buy sell rent york online estate listings properties york nationwide
realestate yahoo estate yahoo estate homes sale mls listings visit yahoo estate search homes sale mls listings housing market information home values school districts mortgage rates	business	realestate yahoo estate yahoo estate homes sale mls listings visit yahoo estate search homes sale mls listings housing market values school districts mortgage rates
realtor realtor com estate listings homes sale search home mortgage rates estate agents relocation services canada puerto rico	business	realtor realtor estate listings homes sale search mortgage rates estate agents relocation services canada puerto rico
paypros payment processing inc home page payment processing inc ppi industry leader comprehensive integrated payment processing solutions	business	paypros payment processing payment processing ppi industry leader comprehensive integrated payment processing solutions
electronicpayments electronicpayments org deposit payment check electronic payments simplifying activities electronic payments processed	business	electronicpayments electronicpayments org deposit payment check electronic payments simplifying activities electronic payments processed
fms treas gov prompt overview prompt payment programs services financial prompt payment ensures federal agencies pay vendors timely manner rate established contract disputes act	business	fms treas gov prompt overview prompt payment programs services financial prompt payment ensures federal agencies pay vendors timely manner rate established contract disputes
cafepress info help payment cafepress com help desk payment information payment screen commission cafecash	business	cafepress info payment cafepress desk payment payment screen commission cafecash
realestate aol estate buying home selling home aol estate aol estate home apartment listings information tools advice rent buy home	business	realestate aol estate buying selling aol estate aol estate apartment listings tools advice rent buy
planetpayment planet payment usa multi-currency card processing online businesses	business	planetpayment planet payment usa multi currency card processing online businesses
wikipedia wiki payment payment wikipedia encyclopedia payment transfer wealth party company payment exchange provision	business	wikipedia wiki payment payment wikipedia encyclopedia payment transfer wealth party company payment exchange provision
engadget jobs chided answers questions shareholder meeting jobs chided answers questions shareholder meeting engadget yeah shareholder meetings boring guy guy stock broker anyway	business	engadget jobs chided answers questions shareholder meeting jobs chided answers questions shareholder meeting engadget yeah shareholder meetings boring guy guy stock broker
macworld news shareholder index macworld news jobs addresses backdating environment apple annual shareholders meeting jobs backdating stock-option scandals greenpeace iphone delay leopard	business	macworld news shareholder macworld news jobs addresses backdating environment apple annual shareholders meeting jobs backdating stock option scandals greenpeace iphone delay leopard
coopamerica socialinvesting shareholderaction co-op america social investing share holder action shareholder activism economic action reform corporate practices policies shareholders world economic power	business	coopamerica socialinvesting shareholderaction op america social investing share holder action shareholder activism economic action reform corporate practices policies shareholders economic power
yhoo client shareholder results yahoo yahoo inc quarterly earnings shareholder briefcase download library shareholder briefcase download library rss news feeds links	business	yhoo client shareholder yahoo yahoo quarterly earnings shareholder briefcase download library shareholder briefcase download library rss news feeds links
americanshareholders americanshareholders com recommended listings futures traders stock market certificates deposit fixed income investing topics	business	americanshareholders americanshareholders recommended listings futures traders stock market certificates deposit fixed income investing topics
georgeson georgeson innovative pioneer international english remember country copyright georgeson inc computershare company rights reserved	business	georgeson georgeson innovative pioneer international english remember country copyright georgeson computershare company rights reserved
share shareholder association research education shareholder association research education national not-for-profit organization helping pension funds build sound investment practices	business	share shareholder association education shareholder association education national profit organization helping pension funds build sound investment practices
lulu signup lulu shareholder account revenue shareholder account vlog profile vodcast podcast	business	lulu signup lulu shareholder account revenue shareholder account vlog profile vodcast podcast
investorwords shareholders shareholder definition shareholder definition shareholder shares stock corporation mutual fund corporations ownership	business	investorwords shareholders shareholder definition shareholder definition shareholder shares stock corporation mutual fund corporations ownership
foe international shareholder confronting companies shareholder power assist investors commitment social issues committed shareholder activism tools prudent	business	foe international shareholder confronting companies shareholder power assist investors commitment social issues committed shareholder activism tools prudent
berkshirehathaway letters letters shareholder letters berkshire hathaway inc shareholder letters	business	berkshirehathaway letters letters shareholder letters berkshire hathaway shareholder letters
issproxy institutional shareholder services provider proxy voting corporate governance services proxy research voting recommendations governance advisory services financial	business	issproxy institutional shareholder services provider proxy voting corporate governance services proxy voting recommendations governance advisory services financial
investopedia terms shareholder shareholder investopedia com investing education comprehensive investing dictionary web articles tutorials	business	investopedia terms shareholder shareholder investopedia investing education comprehensive investing dictionary web articles tutorials
shareholder shareholder com nasdaq company investor relations websites webcasts integrated email fax broadcasts interactive telephone applications mail fulfillment services	business	shareholder shareholder nasdaq company investor relations websites webcasts integrated email fax broadcasts interactive telephone applications mail fulfillment services
shareholderaction shareholder action network social investment forum shareholder action network advocacy policy program program information advocacy	business	shareholderaction shareholder action network social investment forum shareholder action network advocacy policy program program advocacy
scn wum whatsr northwest corporate accountability project shareholder shareholder partial owner percentage outstanding stocks corporation resolutions	business	scn wum whatsr northwest corporate accountability project shareholder shareholder partial owner percentage outstanding stocks corporation resolutions
macnn articles analyst iphone time macnn apple shareholder meeting apple revealed annual shareholder meeting iphone track ship planned hinted itunes video rentals	business	macnn articles analyst iphone time macnn apple shareholder meeting apple revealed annual shareholder meeting iphone track ship planned hinted itunes video rentals
wausaupaper investorinformation services wausau paper investor information shareholder services investor information shareholder services overview investor presentations conference calls meetings annual reports sec filings	business	wausaupaper investorinformation services wausau paper investor shareholder services investor shareholder services overview investor presentations conference calls meetings annual reports filings
paypal welcome paypal paypal buyers shop sharing financial information protection unauthorized payments account	business	paypal paypal paypal buyers shop sharing financial protection unauthorized payments account
paymentsnews payments news payments professionals glenbrook partners payments news glenbrook partners payment professionals daily news electronic payments financial technologies	business	paymentsnews payments news payments professionals glenbrook partners payments news glenbrook partners payment professionals daily news electronic payments financial technologies
authorize payment gateway online payments electronic check payment authorization service serving online businesses	business	authorize payment gateway online payments electronic check payment authorization service serving online businesses
finaid calculators loanpayments finaid calculators loan calculator loan payment calculator computes estimate monthly loan payments annual salary manage	business	finaid calculators loanpayments finaid calculators loan calculator loan payment calculator computes estimate monthly loan payments annual salary manage
verisign online payment processing index online payment processing online payments paypal learn secure payments simplify online payment processing reliable secure affordable credit cards online	business	verisign online payment processing online payment processing online payments paypal learn secure payments simplify online payment processing reliable secure affordable credit cards online
stockbny bny stock transfer welcome bny stock transfer shareholder account access view account balances transactions check account history online	business	stockbny bny stock transfer bny stock transfer shareholder account access view account balances transactions check account history online
overlawyered how the litigation lottery kil overlawyered litigation lottery kills shareholder value event wiped billion shareholder wealth economists disastrous congress hearings	business	overlawyered litigation lottery kil overlawyered litigation lottery kills shareholder event wiped billion shareholder wealth economists disastrous congress hearings
exxonmobil corporate investorinfo corp shareholder shareholder contacts stock transfer stock purchase dividend reinvestment dividend payment electronic funds transfer dividends address inquiries	business	exxonmobil corporate investorinfo corp shareholder shareholder contacts stock transfer stock purchase dividend reinvestment dividend payment electronic funds transfer dividends address inquiries
blog issproxy institutional shareholder services corporate governance blog securities exchange commission sec endorse proposal limit rights shareholders file advisory	business	blog issproxy institutional shareholder services corporate governance blog securities exchange commission endorse proposal limit rights shareholders file advisory
gemi gemi clear advantage building shareholder value shareholder value enhancing environmental social performance customer value shareholder methodologies economic	business	gemi gemi advantage building shareholder shareholder enhancing environmental social performance customer shareholder methodologies economic
windriver phoenix zhtml irol faq wind river shareholder faq shareholder faq investor relations shareholder faq shareholder faq investor packet request contact investor relations	business	windriver phoenix zhtml irol faq wind river shareholder faq shareholder faq investor relations shareholder faq shareholder faq investor packet request contact investor relations
wachovia inside wachovia shareholder services assistance shareholder account help page help manage investment wachovia answers	business	wachovia inside wachovia shareholder services assistance shareholder account manage investment wachovia answers
textron investor contacts index investor relations shareholder resources textron investor relations textron investor contacts textron transfer agent textron registrar textron dividend paying agent textron reinvestment plan	business	textron investor contacts investor relations shareholder resources textron investor relations textron investor contacts textron transfer agent textron registrar textron dividend paying agent textron reinvestment plan
news shareholders blast ceo semel for yahoo performance shareholders blast ceo semel yahoo performance cnet news com shareholders blast ceo semel yahoo performance board recommendations reject pay-for-performance censorship proposals	business	news shareholders blast ceo semel yahoo performance shareholders blast ceo semel yahoo performance cnet news shareholders blast ceo semel yahoo performance board recommendations reject pay performance censorship proposals
portfolio primerica primerica shareholder services manage primerica investments primerica shareholder services	business	portfolio primerica primerica shareholder services manage primerica investments primerica shareholder services
ecommerce roadmap electronic payment schemes paper framework discussion electronic payment schemes comprehensive index schemes overview	business	ecommerce roadmap electronic payment schemes paper framework discussion electronic payment schemes comprehensive schemes overview
azcentral rre rre homepage azcentral com arizona estate listings phoenix homes phoenix estate homes sale scottsdale glendale chandler gilbert ahwatukee paradise valley avondale mesa arizona cities	business	azcentral rre rre homepage azcentral arizona estate listings phoenix homes phoenix estate homes sale scottsdale glendale chandler gilbert ahwatukee paradise valley avondale mesa arizona cities
newsday business realestate newsday com island estate nassau county search newsday estate classifieds	business	newsday business realestate newsday island estate nassau county search newsday estate classifieds
wikipedia wiki real estate estate wikipedia encyclopedia estate immovable property legal jurisdictions encompasses land permanently affixed land	business	wikipedia wiki real estate estate wikipedia encyclopedia estate immovable property legal jurisdictions encompasses land permanently affixed land
reyrey for customers solutions fis index finance insurance solutions reynolds finance insurance solutions deliver accuracy efficiency speed compliance professionalism	business	reyrey customers solutions fis finance insurance solutions reynolds finance insurance solutions deliver accuracy efficiency speed compliance professionalism
autonews apps pbcs dll section category finance automotive news finance insurance service contract sales dealers sold service contracts percent cars trucks retailed	business	autonews apps pbcs dll category finance automotive news finance insurance service contract sales dealers sold service contracts percent cars trucks retailed
aig aig insurance products services united international insurance financial services organization operations countries jurisdictions	business	aig aig insurance products services united international insurance financial services organization operations countries jurisdictions
fgic financial guaranty insurance company provider financial guaranties debt securities	business	fgic financial guaranty insurance company provider financial guaranties debt securities
naifa national association insurance financial advisors naifa licensed life insurance agents financial advisors federation associations united	business	naifa national association insurance financial advisors naifa licensed life insurance agents financial advisors federation associations united
wtexecutive cms content tms cms section section insurance finance investment insight investment insurance industry	business	wtexecutive cms content tms cms insurance finance investment insight investment insurance industry
allstate allstate car insurance quotes online auto insurance financial products auto insurance home insurance business insurance life insurance iras annuities	business	allstate allstate car insurance quotes online auto insurance financial products auto insurance insurance business insurance life insurance iras annuities
insurance finance insurance insurance news resources links insurance news research education organizations resources	business	insurance finance insurance insurance news resources links insurance news education organizations resources
joelonsoftware articles fixing venture capital joel software software companies venture capital industry hurting	business	joelonsoftware articles fixing venture capital joel software software companies venture capital industry hurting
tallwoodvc tallwood venture capital focus semiconductors semiconductor technologies	business	tallwoodvc tallwood venture capital focus semiconductors semiconductor technologies
vcaonline venture capital access online emarketplace venture directory venture capital equity firms venture capital marketplace entrepreneurs investors advisors	business	vcaonline venture capital access online emarketplace venture directory venture capital equity firms venture capital marketplace entrepreneurs investors advisors
brentwoodvc brentwood venture capital investment focus start-up internet software healthcare companies	business	brentwoodvc brentwood venture capital investment focus start internet software healthcare companies
seattlepi nwsource venture seattle post-intelligencer venture capital notebook p-i venture capital notebook technology reporter cook examines funding companies region companies	business	seattlepi nwsource venture seattle post intelligencer venture capital notebook venture capital notebook technology reporter cook examines funding companies region companies
vcic unc edu vcic venture capital investment competition unc warns fake venture capital investment competition scheme vcic nation premiere strategy competition venture -minded	business	vcic unc vcic venture capital investment competition unc warns fake venture capital investment competition scheme vcic nation premiere strategy competition venture minded
insurance finance insurance finance com comprehensive research insurance financial services covering jurisdictions district columbia	business	insurance finance insurance finance comprehensive insurance financial services covering jurisdictions district columbia
michigan gov cis dleg office financial insurance services regulatory agency insurance companies banks financial businesses consumer business information online publications	business	michigan gov cis dleg office financial insurance services regulatory agency insurance companies banks financial businesses consumer business online publications
kaplanfinancial securities insurance compliance kaplan financial career securities insurance education	business	kaplanfinancial securities insurance compliance kaplan financial career securities insurance education
insurance yahoo insurance articles calculators tools advice insurance yahoo financial question answers people yahoo answers flexible premium adjustable life insurance policy	business	insurance yahoo insurance articles calculators tools advice insurance yahoo financial question answers people yahoo answers flexible premium adjustable life insurance policy
nhh for conferences insurance finance nhh international symposium insurance finance welcome papers discipline finance insurance submitted presentation symposium	business	nhh conferences insurance finance nhh international symposium insurance finance papers discipline finance insurance submitted presentation symposium
baylor edu business finance baylor university finance insurance estate department finance insurance estate undergraduate majors bachelors administration bba degree program	business	baylor business finance baylor university finance insurance estate department finance insurance estate undergraduate majors bachelors administration bba degree program
zurich zurich financial services insurance -based financial services insurance -based financial service provider international network	business	zurich zurich financial services insurance based financial services insurance based financial service provider international network
sfstation insurance finance business directory san francisco insurance finance directory station pet health insurance plans customizable budget pet coverage accidents illness genetic conditions dental trauma	business	sfstation insurance finance business directory san francisco insurance finance directory station pet health insurance plans customizable budget pet coverage accidents illness genetic conditions dental trauma
nationjob financial financial jobs nationjob com careers employment financial jobs job listings company profiles updated daily	business	nationjob financial financial jobs nationjob careers employment financial jobs job listings company profiles updated daily
insurancefinancecorp insurance finance corporation welcome skip flash intro	business	insurancefinancecorp insurance finance corporation skip flash intro
theinstitute australian zealand institute insurance finance provider professional education training insurance industry australia zealand asia-pacific region	business	theinstitute australian zealand institute insurance finance provider professional education training insurance industry australia zealand asia pacific region
expatfinancial expat financial expat financial international health insurance life travel disability insurance expatriates living abroad employers	business	expatfinancial expat financial expat financial international health insurance life travel disability insurance expatriates living abroad employers
consumerguideauto howstuffworks car financing and insurance tools finance insurance consumer guide auto editors in-depth analysis unbiased recommendations help car-buying decision buying	business	consumerguideauto howstuffworks car financing insurance tools finance insurance consumer guide auto editors depth analysis unbiased recommendations car buying decision buying
efic gov export finance insurance corporation export finance australian exports clients internationally insurance finance services	business	efic gov export finance insurance corporation export finance australian exports clients internationally insurance finance services
census gov compendia statab banking finance insurance statistical abstract banking finance insurance gross domestic product finance insurance estate rental leasing dollars excel	business	census gov compendia statab banking finance insurance statistical abstract banking finance insurance gross domestic product finance insurance estate rental leasing dollars excel
ifsjobs ifsjobs com insurance jobs financial services jobs ifsjobs com premier niche employment designed recruiting staffing insurance financial services industry	business	ifsjobs ifsjobs insurance jobs financial services jobs ifsjobs premier niche employment designed recruiting staffing insurance financial services industry
careers finance careers finance insurance overview hottest jobs finance aren wall street jobs insurance insurance trillion dollar business	business	careers finance careers finance insurance overview hottest jobs finance wall street jobs insurance insurance trillion dollar business
upac upac upac pin password signing indicates acceptance web sites conditions upac pin code password	business	upac upac upac pin password signing acceptance web sites conditions upac pin code password
johnhancock hancock insurance financial services founded life insurance company hancock leading provider financial services products control	business	johnhancock hancock insurance financial services founded life insurance company hancock leading provider financial services products control
paulgraham vcsqueeze venture capital squeeze venture capital funds squeezed directions stuck seller market	business	paulgraham vcsqueeze venture capital squeeze venture capital funds squeezed directions stuck seller market
morebusiness running your business financing vent cap brc venture capital analysis companies venture capital stimulate economic growth companies venture funding establish credibility	business	morebusiness running business financing vent cap brc venture capital analysis companies venture capital stimulate economic growth companies venture funding establish credibility
dow venture dow venture capital dow venture capital invests promising start-up companies north america europe asia portfolio capital technology	business	dow venture dow venture capital dow venture capital invests promising start companies north america europe asia portfolio capital technology
sba gov inv business administration temp programoffice style economy businesses stimulating supplementing flow equity capital loan funds sound financing	business	sba gov inv business administration temp programoffice style economy businesses stimulating supplementing flow equity capital loan funds sound financing
wikipedia wiki venture capital venture capital wikipedia encyclopedia venture capitalist investments venture capital fund pooled investment vehicle partnership	business	wikipedia wiki venture capital venture capital wikipedia encyclopedia venture capitalist investments venture capital fund pooled investment vehicle partnership
philly inquirer real estate inquirer estate alan heavens answers questions home improvement estate online http philly com askheavens live discussion	business	philly inquirer real estate inquirer estate alan heavens answers questions improvement estate online http philly askheavens live discussion
realestate netscape estate channel netscape com estate reaseach university gradutes home percent people graduated	business	realestate netscape estate channel netscape estate reaseach university gradutes percent people graduated
detnews apps pbcs dll section category biz detroit news online estate estate services rent detroit statewide metro detroit home sales indicate estate market stagnant	business	detnews apps pbcs dll category biz detroit news online estate estate services rent detroit statewide metro detroit sales estate market stagnant
dmoz business real estate directory business estate estate search altavista aol clusty gigablast google lycos msn wisenut yahoo google web directory	business	dmoz business real estate directory business estate estate search altavista aol clusty gigablast google lycos msn wisenut yahoo google web directory
orlandosentinel classified realestate orlando central florida estate homes sale condos search orlandosentinel com orlando central florida estate florida estate orlando condos apartments homes rent land sale	business	orlandosentinel classified realestate orlando central florida estate homes sale condos search orlandosentinel orlando central florida estate florida estate orlando condos apartments homes rent land sale
nypost realestate index cerr york estate york city york estate york city estate nypost com york city estate online	business	nypost realestate cerr york estate york city york estate york city estate nypost york city estate online
courant classified realestate estate information hartford courant classifieds estate connecticut premiere news homescape	business	courant classified realestate estate hartford courant classifieds estate connecticut premiere news homescape
pages ebay realestate ebay estate search estate search titles descriptions outer banks waterfront estate grand bed bath house	business	ebay realestate ebay estate search estate search titles descriptions outer banks waterfront estate grand bed bath house
gmacrealestate gmac estate online serving home buying home assisting home buying home selling gmac estate help home property search mls listings homes sale	business	gmacrealestate gmac estate online serving buying assisting buying selling gmac estate property search mls listings homes sale
marketplace nwsource realestate nwhomes seattle estate houses condos property sale seattle estate homes sale seattle bellevue redmond kirkland issaquah condos townhomes houses	business	marketplace nwsource realestate nwhomes seattle estate houses condos property sale seattle estate homes sale seattle bellevue redmond kirkland issaquah condos townhomes houses
latimes classified realestate estate news los angeles los angeles leading online source national world entertainment sports news plus jobs estate cars shopping information	business	latimes classified realestate estate news los angeles los angeles leading online source national entertainment sports news jobs estate cars shopping
[truncated: 6,545 more rows]
