# Supplementary material for: An adaptive method for determining the optimal number of topics in topic modeling
Source: PeerJ journal article supplement (doi:10.7717/peerj-cs.2723), 2025-02-28
Supplement: Code.zip [file snippets2_gsdmm.xlsx]

## Sheet: Sheet1
new	type	new_nltk	topic2	topic3	topic4	topic5	topic6	topic7	topic8	topic9	topic10	topic11	topic12	topic13	topic14	topic15	topic16	topic17	topic18	topic19	topic20
diesel booksense diesel bookstore unconventional selections monthly bestseller personify diesel independent aesthetic readers fancy books	engineering	diesel booksense diesel bookstore unconventional selections monthly bestseller personify diesel independent aesthetic readers fancy books	1	2	1	0	3	0	6	6	5	8	8	1	1	11	2	4	14	16	18
dieselmusic diesel website diesel woman girl linger trouble lift finger kindness	engineering	dieselmusic diesel website diesel woman girl linger trouble lift finger kindness	1	2	1	0	3	0	6	6	5	10	7	0	13	7	2	10	3	17	18
dieselpgh diesel club lounge fueling pittsburgh nightlife tune-up expectations pittsburgh nightlife diesel club lounge southside carson chic upscale multi-level	engineering	dieselpgh diesel club lounge fueling pittsburgh nightlife tune expectations pittsburgh nightlife diesel club lounge southside carson chic upscale multi level	1	1	1	2	3	0	1	8	2	10	5	1	13	14	2	10	3	12	18
dieselforum diesel technology forum diesel technology forum diesel technology forum organization diesel engine manufacturers fuel suppliers exhaust after-treatment manufacturers dedicated	engineering	dieselforum diesel technology forum diesel technology forum diesel technology forum organization diesel engine manufacturers fuel suppliers exhaust treatment manufacturers dedicated	1	2	1	0	3	0	4	6	5	8	8	1	1	11	6	4	14	16	8
dieselkids dieselkids catalogue	engineering	dieselkids dieselkids catalogue	1	2	3	2	2	4	2	5	3	8	0	9	12	5	14	16	14	12	15
dieselnet dieselnet diesel emissions online information service diesel exhaust emissions emission control technologies diesel engines fuels topics	engineering	dieselnet dieselnet diesel emissions online service diesel exhaust emissions emission control technologies diesel engines fuels topics	1	2	1	0	3	0	4	6	5	8	8	1	1	11	6	4	14	16	8
dieselmusic diesel album gigs store media discs merch archive contacts links home hepfidelity records	engineering	dieselmusic diesel album gigs store media discs merch archive contacts links hepfidelity records	1	1	1	0	3	0	6	6	4	10	7	1	7	7	3	7	3	17	17
detroitdiesel detroit diesel detroit diesel manufacturer on-highway medium heavy-duty diesel engines engage design manufacture sale service	engineering	detroitdiesel detroit diesel detroit diesel manufacturer highway medium heavy duty diesel engines engage design manufacture sale service	1	2	1	0	3	0	4	6	5	8	8	1	1	11	6	4	14	16	8
diesel association diesel specialists international industry trade association dedicated level service diesel fuel injection systems	engineering	diesel association diesel specialists international industry trade association dedicated level service diesel fuel injection systems	1	2	1	0	3	0	4	6	5	8	8	1	1	11	6	4	14	16	8
imdb name vin diesel vin diesel imdb movies celebs	engineering	imdb vin diesel vin diesel imdb movies celebs	1	1	1	2	3	0	6	8	6	10	7	0	7	7	3	10	10	12	18
wikipedia wiki diesel diesel wikipedia encyclopedia diesel diesel fuel fractional distillate fuel oil petroleum fuel diesel engine invented german engineer	engineering	wikipedia wiki diesel diesel wikipedia encyclopedia diesel diesel fuel fractional distillate fuel oil petroleum fuel diesel engine invented german engineer	1	2	1	0	3	0	4	6	5	8	8	1	1	11	6	4	14	16	8
dieselsweeties diesel sweeties pixelated robot romance web comic t-shirt party romantic comics starring burnt-out retired porn star robot boyfriend clango watch indie rockers metalheads	engineering	dieselsweeties diesel sweeties pixelated robot romance web comic shirt party romantic comics starring burnt retired porn star robot boyfriend clango watch indie rockers metalheads	1	2	1	2	0	5	6	8	6	10	7	0	13	7	2	10	10	12	9
wikipedia wiki diesel engine diesel engine wikipedia encyclopedia encyclopedia article covers diesel engine technology applications addresses technical historical background characteristics	engineering	wikipedia wiki diesel engine diesel engine wikipedia encyclopedia encyclopedia article covers diesel engine technology applications addresses technical historical background characteristics	1	2	1	0	3	0	4	6	5	8	8	1	1	11	6	4	14	16	8
diesel lockin combination traditional traditionally illegal methods hostile diesel com theft unreleased underwear collection	engineering	diesel lockin combination traditional traditionally illegal methods hostile diesel theft unreleased underwear collection	1	2	1	0	3	0	6	6	5	10	8	1	1	11	6	4	14	16	18
diesel diesel italian jeans casuals clothing manufacturer	engineering	diesel diesel italian jeans casuals clothing manufacturer	1	2	1	0	3	0	4	6	5	8	8	1	1	11	6	10	14	16	8
jaydm jdm jdm engine motor swap specialize honda acura japanese import performance auto inquire motor swaps engine swaps rota wheels jdm import tuning	engineering	jaydm jdm jdm engine motor swap specialize honda acura japanese import performance auto inquire motor swaps engine swaps rota wheels jdm import tuning	1	2	1	0	3	1	4	6	5	0	8	1	1	11	6	9	3	16	9
kingsmotorbikes index kings motor bikes motorized bicycle bicycle engine kit bicycle bicycle engine kit convert bicycle motorized bike sale bicycle	engineering	kingsmotorbikes kings motor bikes motorized bicycle bicycle engine kit bicycle bicycle engine kit convert bicycle motorized bike sale bicycle	1	2	1	0	3	0	4	6	5	8	8	1	1	11	6	4	14	16	8
lubricants elf oil additives engine oil motor oil elf lubricants welcome elf lubricants auto moto agriculture transport construction industry marine fishing boating aviation racing antiques	engineering	lubricants elf oil additives engine oil motor oil elf lubricants elf lubricants auto moto agriculture transport construction industry marine fishing boating aviation racing antiques	1	2	1	0	3	0	4	6	5	8	8	1	1	11	6	4	14	16	8
motormeister motor meister inc porsche engine rebuilder motor meister engine rebuilding engines headquarters crew carburetors accessories motor rebuild kits shipping performance racing	engineering	motormeister motor meister porsche engine rebuilder motor meister engine rebuilding engines headquarters crew carburetors accessories motor rebuild kits shipping performance racing	1	2	1	0	3	1	4	6	5	8	8	1	1	11	6	9	14	16	8
epa gov otaq fees motor vehicle engine compliance program fees information welcome office transportation air quality motor vehicle engine compliance program mvecp fees information page	engineering	epa gov otaq fees motor vehicle engine compliance program fees office transportation air quality motor vehicle engine compliance program mvecp fees	1	2	1	0	3	0	4	6	5	8	8	1	1	11	5	4	14	16	8
rotaryengineillustrated rotary engine illustrated wankel motor resource educational material addresses technical background pictures animations	engineering	rotaryengineillustrated rotary engine illustrated wankel motor resource educational material addresses technical background pictures animations	1	2	1	0	3	0	4	6	5	8	8	1	1	11	6	4	14	16	8
auto howstuffworks diesel howstuffworks diesel engines gasoline engines diesel engines gasoline engines diesel engine action learn mechanics diesel engines intake	engineering	auto howstuffworks diesel howstuffworks diesel engines gasoline engines diesel engines gasoline engines diesel engine action learn mechanics diesel engines intake	1	2	1	0	3	0	4	6	5	8	8	1	1	11	6	4	14	16	8
howstuffworks diesel howstuffworks diesel engines diesel engines gasoline engines diesel engines compare diesel fuel injection diesel fuel	engineering	howstuffworks diesel howstuffworks diesel engines diesel engines gasoline engines diesel engines compare diesel fuel injection diesel fuel	1	2	1	0	3	0	4	6	5	8	8	1	1	11	6	4	14	16	8
diesel ebooks download ebooks diesel ebooks download ebooks enjoy titles categorized searching diesel ebooks formats microsoft reader adobe palm ereader	engineering	diesel ebooks download ebooks diesel ebooks download ebooks enjoy titles categorized searching diesel ebooks formats microsoft reader adobe palm ereader	1	2	1	0	3	0	6	6	5	8	8	1	1	11	6	4	14	16	8
auto howstuffworks gasoline howstuffworks gasoline gasoline world grind screeching halt consumes billion gallons gasoline	engineering	auto howstuffworks gasoline howstuffworks gasoline gasoline grind screeching halt consumes billion gallons gasoline	1	2	1	0	3	0	4	6	5	0	8	1	1	11	6	4	14	16	8
grc nasa gov airplane fuelsys engine fuel system combustion engine fuel oxygen combustion process power crankshaft engine	engineering	grc nasa gov airplane fuelsys engine fuel system combustion engine fuel oxygen combustion process power crankshaft engine	1	2	1	0	3	0	4	6	5	8	8	1	1	11	6	4	14	16	8
fueleconomy gov feg gasprices gasoline prices links gasoline price information finding expensive gas gas mileage car national gas prices	engineering	fueleconomy gov feg gasprices gasoline prices links gasoline price finding expensive gas gas mileage car national gas prices	1	2	1	0	3	0	4	6	9	4	8	1	1	11	6	4	14	16	8
eia doe gov neic brochure oil gas primer primer primer gasoline prices gasoline products refined crude oil accounts percent energy consumed united	engineering	eia doe gov neic brochure oil gas primer primer primer gasoline prices gasoline products refined crude oil accounts percent energy consumed united	1	2	1	0	3	0	4	6	9	4	8	1	1	11	6	4	14	16	8
wikipedia wiki engine engine wikipedia encyclopedia context propulsion systems air breathing engine timeline motor engine technology timeline heat engine	engineering	wikipedia wiki engine engine wikipedia encyclopedia context propulsion systems air breathing engine timeline motor engine technology timeline heat engine	1	2	1	0	3	0	4	6	5	8	8	1	1	11	6	4	14	16	8
eia doe gov oil gas petroleum data publications wrgp mogas home retail gasoline prices retail gasoline prices formulation data analysis energy information administration	engineering	eia doe gov oil gas petroleum data publications wrgp mogas retail gasoline prices retail gasoline prices formulation data analysis energy administration	1	2	1	0	3	0	4	6	9	4	8	1	1	11	6	4	14	16	8
wikipedia wiki gasoline gasoline wikipedia encyclopedia gasoline petrol petroleum-derived liquid mixture consisting hydrocarbons enhanced benzene iso-octane octane	engineering	wikipedia wiki gasoline gasoline wikipedia encyclopedia gasoline petrol petroleum derived liquid mixture consisting hydrocarbons enhanced benzene iso octane octane	1	2	1	0	3	0	4	6	5	8	8	1	1	11	6	4	14	16	8
auto howstuffworks engine howstuffworks engine lubrication fuel exhaust electrical learn car engine lubrication system fuel system exhaust system electrical system car running smoothly	engineering	auto howstuffworks engine howstuffworks engine lubrication fuel exhaust electrical learn car engine lubrication system fuel system exhaust system electrical system car running smoothly	1	2	1	0	3	0	4	6	5	8	8	1	1	11	6	4	14	16	8
evworld news newsid evworld newswire ford confirms fuel -efficient gasoline engine twin force engine deliver power-performance fuel economy utilizing injection turbcharging	engineering	evworld news newsid evworld newswire ford confirms fuel efficient gasoline engine twin force engine deliver power performance fuel economy utilizing injection turbcharging	1	2	1	0	3	0	4	6	5	8	8	1	1	11	6	4	14	16	8
spacemart reports toyota develops more fuel efficient engine system toyota fuel -efficient engine system tokyo afp japan toyota motor corp developed next-generation engine valve mechanism fuel	engineering	spacemart reports toyota develops fuel efficient engine system toyota fuel efficient engine system tokyo afp japan toyota motor corp developed generation engine valve mechanism fuel	1	2	1	0	3	0	4	6	5	8	8	1	1	11	6	4	14	16	8
mil news story tests jet engine fuel air force accomplished aviation stratofortress flew fuel sept flight test running	engineering	mil news story tests jet engine fuel air force accomplished aviation stratofortress flew fuel sept flight test running	1	2	1	0	3	0	4	6	5	8	8	1	1	11	6	4	14	16	8
eere energy gov hydrogenandfuelcells tech validation pdfs fcm module fuel cell engine safety hydrogen fuel cell engine hydrogen air pass fuel duty fuel cell engine seals	engineering	eere energy gov hydrogenandfuelcells tech validation pdfs fcm module fuel cell engine safety hydrogen fuel cell engine hydrogen air pass fuel duty fuel cell engine seals	1	0	1	0	3	0	4	6	5	8	8	1	1	11	6	4	14	16	8
eng tips threadminder pid engine fuel engineering forum eng-tips description engine fuel engineering technical forum mutual help system engineering professionals selling recruiting forbidden	engineering	eng tips threadminder pid engine fuel engineering forum eng tips description engine fuel engineering technical forum mutual system engineering professionals selling recruiting forbidden	1	0	1	0	3	0	4	6	5	8	8	1	1	11	6	4	14	1	8
tonto eia doe gov oog info gdu gasdiesel gasoline diesel fuel update gasoline diesel fuel prices charted region country listed	engineering	tonto eia doe gov oog info gdu gasdiesel gasoline diesel fuel update gasoline diesel fuel prices charted region country listed	1	2	1	0	3	0	4	6	9	2	8	1	13	11	3	4	8	15	18
news ford confirms fuel -efficient gas engine tech news blog ford true twin force gas engine par diesel engines fuel efficiency	engineering	news ford confirms fuel efficient gas engine tech news blog ford true twin force gas engine par diesel engines fuel efficiency	1	2	1	0	3	0	4	6	5	8	8	1	1	11	6	4	14	16	8
amazon ford injection electronic engine control amazon com ford fuel injection electronic engine control amazon com ford fuel injection electronic engine control ford lincoln-mercury cars light trucks books probst	engineering	amazon ford injection electronic engine control amazon ford fuel injection electronic engine control amazon ford fuel injection electronic engine control ford lincoln mercury cars light trucks books probst	1	2	1	0	3	0	4	6	5	8	8	1	1	11	6	4	14	16	8
amazon bosch fuel injection engine management amazon com bosch fuel injection engine management bosch amazon com bosch fuel injection engine management bosch books probst probst	engineering	amazon bosch fuel injection engine management amazon bosch fuel injection engine management bosch amazon bosch fuel injection engine management bosch books probst probst	1	2	1	0	3	0	4	6	5	8	8	1	1	11	6	4	14	16	8
auto howstuffworks engine howstuffworks combustion potato cannon principle reciprocating combustion engine tiny high-energy fuel gasoline	engineering	auto howstuffworks engine howstuffworks combustion potato cannon principle reciprocating combustion engine tiny energy fuel gasoline	1	2	1	0	3	0	4	6	5	8	8	1	1	11	6	4	14	16	8
drivingethanol ethanol ethanol fuel fuel ethanol engine promotes ethanol fuel american vehicles news items benefits fuel help awareness ethanol	engineering	drivingethanol ethanol ethanol fuel fuel ethanol engine promotes ethanol fuel american vehicles news items benefits fuel awareness ethanol	1	0	1	0	3	0	4	6	5	8	8	1	1	11	6	4	14	16	8
today reuters news newsarticle sciencenews storyid rtrukoc daimlerchrysler engines mercedes fuel -sipping engine tech sci science idea spark plug ignite fuel air mixture engine speed medium speeds combustion	engineering	reuters news newsarticle sciencenews storyid rtrukoc daimlerchrysler engines mercedes fuel sipping engine tech sci science idea spark plug ignite fuel air mixture engine speed medium speeds combustion	1	2	1	0	3	0	4	6	5	8	8	1	1	11	6	4	14	16	8
wikipedia wiki internal combustion engine combustion engine wikipedia encyclopedia encyclopedia article covers combustion engine technology applications addresses operation modes thermodynamic cycle efficiency fuel	engineering	wikipedia wiki internal combustion engine combustion engine wikipedia encyclopedia encyclopedia article covers combustion engine technology applications addresses operation modes thermodynamic cycle efficiency fuel	1	2	1	0	3	0	4	6	5	8	8	1	1	11	6	4	14	16	8
wikipedia wiki category engine fuel system technology category engine fuel system technology wikipedia pages category engine fuel system technology pages section category airbox amal motorcycle autogas	engineering	wikipedia wiki category engine fuel system technology category engine fuel system technology wikipedia category engine fuel system technology category airbox amal motorcycle autogas	1	2	1	0	3	0	4	6	5	8	8	1	1	11	6	4	14	16	8
carbibles fuel engine bible car bibles fuel engine bible fuel engine bible covering fuel petrol gasoline octane rating power bhp gas grades -stroke	engineering	carbibles fuel engine bible car bibles fuel engine bible fuel engine bible covering fuel petrol gasoline octane rating power bhp gas grades stroke	1	2	1	0	3	0	4	6	5	8	8	1	1	11	6	4	14	16	8
howstuffworks engine howstuffworks car engines steam engine old-fashioned trains steam boats combustion engine fuel coal wood oil whatever steam	engineering	howstuffworks engine howstuffworks car engines steam engine fashioned trains steam boats combustion engine fuel coal wood oil steam	1	2	1	0	3	0	4	6	5	8	8	1	1	11	6	4	14	16	8
journeytoforever biofuel library ethanol motherearth mother earth alcohol fuel alcohol engine fuel alcohol characteristics natural engine fuel octane rating engine detonation	engineering	journeytoforever biofuel library ethanol motherearth mother earth alcohol fuel alcohol engine fuel alcohol characteristics natural engine fuel octane rating engine detonation	1	0	1	0	3	0	4	6	5	8	8	1	1	11	6	4	14	16	8
autorepair about enginefuel engine fuel engine fuel articles links fuels fuel systems	engineering	autorepair enginefuel engine fuel engine fuel articles links fuels fuel systems	1	2	1	0	3	0	4	6	5	8	8	1	1	11	6	4	14	16	8
ontronic ontronic programmable electronic fuel injection engine manufacturer programmable electronic engine management systems racing applications product specifications technical manuals software	engineering	ontronic ontronic programmable electronic fuel injection engine manufacturer programmable electronic engine management systems racing applications product specifications technical manuals software	1	2	1	0	3	0	4	6	5	8	8	1	1	11	6	4	14	16	8
wikipedia wiki timeline motor and engine technology timeline motor engine technology wikipedia timeline motor engine technology combustion engine electric motor charged engine peak power usage	engineering	wikipedia wiki timeline motor engine technology timeline motor engine technology wikipedia timeline motor engine technology combustion engine electric motor charged engine peak power usage	1	2	1	0	3	0	4	6	5	8	8	1	1	11	6	4	14	16	8
cylinders library ucsb edu radio cylinder preservation digitization project cylinder radio expert curators guide repertoire cylinder recordings streaming cylinder radio streams monthly	engineering	cylinders library ucsb radio cylinder preservation digitization project cylinder radio expert curators guide repertoire cylinder recordings streaming cylinder radio streams monthly	1	1	3	0	3	1	6	2	5	4	8	2	1	1	3	9	15	9	15
findarticles articles engine performance motor articles engine performance motor autos looksmart articles	engineering	findarticles articles engine performance motor articles engine performance motor autos looksmart articles	1	2	1	0	3	1	4	6	5	8	8	1	1	11	6	4	14	16	8
wikipedia wiki turbine turbine wikipedia encyclopedia turbine rotary engine extracts energy fluid flow claude burdin coined latin turbinis vortex	engineering	wikipedia wiki turbine turbine wikipedia encyclopedia turbine rotary engine extracts energy fluid flow claude burdin coined latin turbinis vortex	1	2	1	0	3	1	4	6	5	8	8	1	1	11	6	4	14	16	8
turbine turbine home turbine inc leading producer publisher online subscription entertainment award-winning asheron call games	engineering	turbine turbine turbine leading producer publisher online subscription entertainment award winning asheron call games	1	2	1	0	3	1	4	6	5	8	6	1	1	11	5	4	3	12	2
nhp nhp electrical distribution nhp electrical engineering products pty ltd leading products systems solutions key electrotechnology sectors motor	engineering	nhp nhp electrical distribution nhp electrical engineering products pty leading products systems solutions key electrotechnology sectors motor	1	0	1	0	3	0	4	6	5	4	8	1	1	11	5	4	14	1	2
wikipedia wiki cylinder cylinder wikipedia encyclopedia cylinder cylinder geometry three-dimensional geometric surface cylinder algebra cartesian product superset	engineering	wikipedia wiki cylinder cylinder wikipedia encyclopedia cylinder cylinder geometry dimensional geometric surface cylinder algebra cartesian product superset	1	0	1	0	3	1	6	6	5	4	8	1	1	11	6	9	14	16	8
wikipedia wiki cylinder engine cylinder engine wikipedia encyclopedia cylinder central reciprocating engine space piston travels cylinders arranged	engineering	wikipedia wiki cylinder engine cylinder engine wikipedia encyclopedia cylinder central reciprocating engine space piston travels cylinders arranged	1	0	1	0	3	1	4	6	5	4	8	1	1	11	6	9	14	16	8
mathworld wolfram cylinder cylinder wolfram mathworld cylinder meanings usage word cylinder solid bounded generalized	engineering	mathworld wolfram cylinder cylinder wolfram mathworld cylinder meanings usage word cylinder solid bounded generalized	1	0	1	0	3	1	6	6	5	4	8	2	1	11	6	9	14	16	8
mathleague help geometry space space figures solids space figures cubes spheres cylinders prisms cones pyramids space figure flat polyhedron	engineering	mathleague geometry space space figures solids space figures cubes spheres cylinders prisms cones pyramids space figure flat polyhedron	1	1	1	0	3	1	6	6	5	4	8	2	1	11	6	9	14	16	8
math school subject lessons three-dimensional figures cylinders cones spheres cylinder prism bases circles polygons cylinder curved flat	engineering	math school subject lessons dimensional figures cylinders cones spheres cylinder prism bases circles polygons cylinder curved flat	1	1	1	0	3	1	6	6	5	4	8	2	1	11	6	9	14	16	8
cylinders library ucsb edu cylinder preservation digitization project digital collection recordings university california santa searchable database history cylinder recordings	engineering	cylinders library ucsb cylinder preservation digitization project digital collection recordings university california santa searchable database history cylinder recordings	1	1	3	0	3	1	6	2	5	4	8	2	1	1	3	9	15	9	15
worthingtoncylinders gas tanks refrigerant recovery industrial gas cylinders manufacturer aluminum gas cylinders recreational vehicles home	engineering	worthingtoncylinders gas tanks refrigerant recovery industrial gas cylinders manufacturer aluminum gas cylinders recreational vehicles	1	0	1	0	3	1	4	6	5	4	8	1	1	11	6	4	14	16	8
loc gov preserv care record cylinder disc tape care nutshell preservation library cylinder disc tape care nutshell preservation directorate library congress	engineering	loc gov preserv care record cylinder disc tape care nutshell preservation library cylinder disc tape care nutshell preservation directorate library congress	1	0	3	3	3	4	4	2	5	4	3	10	1	1	3	9	5	9	15
parker cylinder industrial cylinder home central manufacturing plants cylinder components regional plants company efficiently organized responsive	engineering	parker cylinder industrial cylinder central manufacturing plants cylinder components regional plants company efficiently organized responsive	1	0	1	0	3	1	4	6	5	4	8	1	1	11	6	4	14	16	8
mind zona mmts geometrysection surfaceareasandvolumes areavolumecylinder surface volume box imagine cylinder tin mind cut cylinder plus	engineering	mind zona mmts geometrysection surfaceareasandvolumes areavolumecylinder surface volume box imagine cylinder tin mind cut cylinder	1	0	1	0	3	1	6	6	5	4	8	2	1	11	6	9	15	9	15
tinfoil tinfoil com recorded wax cylinders sound recording methods wax cylinder records antique phonographs	engineering	tinfoil tinfoil recorded wax cylinders sound recording methods wax cylinder records antique phonographs	1	0	1	0	3	1	4	6	5	4	8	1	1	11	6	9	15	9	15
auto howstuffworks master brake howstuffworks master cylinders combination valves master cylinder pressure engages car brakes learn master cylinder combination valve	engineering	auto howstuffworks master brake howstuffworks master cylinders combination valves master cylinder pressure engages car brakes learn master cylinder combination valve	1	0	1	0	3	1	4	6	5	4	8	1	1	11	6	4	14	16	8
cancerweb ncl cgi bin omd cylinder cylinder online medical dictionary cyclotropia cyclozoonosis cycrimine hydrochloride cyd cyesis cyheptamide cylinder retinoscopy cylindraxis cylindrical	engineering	cancerweb ncl cgi bin omd cylinder cylinder online medical dictionary cyclotropia cyclozoonosis cycrimine hydrochloride cyd cyesis cyheptamide cylinder retinoscopy cylindraxis cylindrical	1	0	1	3	3	1	0	6	5	4	3	0	0	3	10	10	5	3	15
memory loc gov ammem edhtml edcyldr edison history edison cylinder phonograph edison paper metal cylinder tin foil wrapped machine diaphragm-and-needle units recording	engineering	memory loc gov ammem edhtml edcyldr edison history edison cylinder phonograph edison paper metal cylinder tin foil wrapped machine diaphragm needle units recording	1	0	1	0	3	4	4	2	5	4	8	1	1	11	6	9	14	9	15
indyheads indy cylinder heads racing experience cylinder head manifold development indy race cars	engineering	indyheads indy cylinder heads racing experience cylinder head manifold development indy race cars	1	1	1	0	3	1	4	6	5	4	8	1	1	11	6	9	14	16	8
americancylinder welcome american cylinder inc manufactures fluid power components pneumatic hydraulic air cylinders linear slides flow control valves	engineering	americancylinder american cylinder manufactures fluid power components pneumatic hydraulic air cylinders linear slides flow control valves	1	0	1	0	3	1	4	6	5	4	8	1	1	11	6	4	14	16	8
milwaukeecylinder milwaukee cylinder hydraulic pneumatic pressure milwaukee cylinder established supplier engineered cylinder solutions manufacturer standard steel	engineering	milwaukeecylinder milwaukee cylinder hydraulic pneumatic pressure milwaukee cylinder established supplier engineered cylinder solutions manufacturer standard steel	1	0	1	0	3	1	4	6	5	4	8	1	1	11	6	4	14	16	8
peninsularcylinders peninsular cylinder hydraulic cylinder air cylinder model cylinder configurator customers answer questions menus eliminating confusing	engineering	peninsularcylinders peninsular cylinder hydraulic cylinder air cylinder model cylinder configurator customers answer questions menus eliminating confusing	1	0	1	0	3	1	4	6	5	4	8	1	1	11	6	9	14	16	8
brodix brodix cylinder heads innovative cylinder head manufactures aluminum cylinder racing heads street pro street drag racing oval imca sprint cars	engineering	brodix brodix cylinder heads innovative cylinder head manufactures aluminum cylinder racing heads street pro street drag racing oval imca sprint cars	1	1	1	0	3	1	4	6	5	4	8	1	1	11	6	9	14	16	8
zfacts gas prices price history gasoline -price energy policy gasoline prices customize gas prices web	engineering	zfacts gas prices price history gasoline price energy policy gasoline prices customize gas prices web	1	2	1	0	3	0	4	6	9	4	8	1	1	11	6	4	14	16	8
wikipedia wiki tesla turbine tesla turbine wikipedia encyclopedia tesla turbine bladeless turbine design patented nikola tesla bladeless turbine boundary	engineering	wikipedia wiki tesla turbine tesla turbine wikipedia encyclopedia tesla turbine bladeless turbine design patented nikola tesla bladeless turbine boundary	1	0	1	0	3	0	4	6	5	8	8	1	1	11	5	4	14	16	8
turbine apache moving apache turbine apache turbine project web application development framework facilitate building secure web applications dash framework	engineering	turbine apache moving apache turbine apache turbine project web application development framework facilitate building secure web applications dash framework	1	2	1	0	3	0	4	6	5	8	8	1	1	11	5	4	14	16	8
turbine apache turbine turbine turbine servlet framework experienced java developers build web applications turbine personalize	engineering	turbine apache turbine turbine turbine servlet framework experienced java developers build web applications turbine personalize	1	2	1	0	3	0	4	6	5	8	8	1	1	11	5	4	14	16	8
lotro lord rings online™ shadows angmar™ home page proud announce turbine referral program game family friends lord rings	engineering	lotro lord rings shadows turbine referral program game family friends lord rings	1	0	1	0	3	1	4	6	5	0	8	4	1	11	5	10	3	16	8
fuellesspower gravity fuelless gravity engine motor generator fuelless gravity motor invented discovered fuelless engine car build	engineering	fuellesspower gravity fuelless gravity engine motor generator fuelless gravity motor invented discovered fuelless engine car build	1	2	1	0	3	0	4	6	5	8	8	1	1	11	6	4	14	16	8
britannica ebi article motor engine britannica student encyclopedia motor engine self-contained devices convert electrical chemical nuclear energy mechanical energy motors engines	engineering	britannica ebi article motor engine britannica student encyclopedia motor engine contained devices convert electrical chemical nuclear energy mechanical energy motors engines	1	0	1	0	3	0	4	6	5	8	8	1	1	11	6	4	14	16	8
gizmodo gadgets prototype engine electric motor for sonex sports aircraft cleared for take off prototype engine electric motor sonex sports aircraft cleared fly jpg sonex purveyor banana-yellow kit airplanes mark unveiled prototype electric motor	engineering	gizmodo gadgets prototype engine electric motor sonex sports aircraft cleared prototype engine electric motor sonex sports aircraft cleared fly jpg sonex purveyor banana yellow kit airplanes mark unveiled prototype electric motor	1	2	1	0	3	1	4	6	5	8	8	1	1	11	5	4	14	1	8
made china machinery catalog motor engine china motor engine motor engine catalog china motor engine china motor engine catalog motor engine manufacturer directory trade platform china motor engine manufacturers global motor engine	engineering	china machinery catalog motor engine china motor engine motor engine catalog china motor engine china motor engine catalog motor engine manufacturer directory trade platform china motor engine manufacturers global motor engine	1	2	1	0	3	0	4	6	5	8	8	1	1	11	5	4	14	1	8
honda engines honda engines honda honda marine honda power equipment home products dealer distributor locator literature product manuals	engineering	honda engines honda engines honda honda marine honda power equipment products dealer distributor locator literature product manuals	1	2	1	0	3	1	4	6	5	0	8	1	1	11	6	4	14	16	2
auto howstuffworks engine howstuffworks car engines car engine amazing machines daily mitsubishi wheel motor coverage detroit auto	engineering	auto howstuffworks engine howstuffworks car engines car engine amazing machines daily mitsubishi wheel motor coverage detroit auto	1	2	1	0	3	1	4	6	5	0	8	1	1	11	6	9	14	16	8
dieselenginemotor buy sell diesel engine diesel engine motor com rebuilt remanufactured diesel engines diesel engine kubota isuzu deutz	engineering	dieselenginemotor buy sell diesel engine diesel engine motor rebuilt remanufactured diesel engines diesel engine kubota isuzu deutz	1	2	1	0	3	0	4	6	5	8	8	1	1	11	6	4	14	16	8
wsu edu brians errors engine engine motor people distinguish electrically powered unit motor engine helps auto-parts	engineering	wsu brians errors engine engine motor people distinguish electrically powered unit motor engine helps auto	1	2	1	0	3	1	4	6	5	8	8	1	1	11	6	4	14	16	8
alibaba showroom motor engine motor engine manufacturers motor engine manufacturers exporters suppliers traders companies factories alibaba com world online base suppliers importers	engineering	alibaba showroom motor engine motor engine manufacturers motor engine manufacturers exporters suppliers traders companies factories alibaba online base suppliers importers	1	0	1	0	3	1	4	6	5	8	8	1	1	11	6	4	14	1	2
worldwidewords articles engine world words engine motor article words engine motor	engineering	worldwidewords articles engine engine motor article engine motor	1	2	1	0	3	0	4	6	5	8	8	1	1	11	6	4	14	16	8
americanturbine pumps pump systems pump american turbine pump turbine submersible pumps pump systems pump american turbine pump water fluids information pump	engineering	americanturbine pumps pump systems pump american turbine pump turbine submersible pumps pump systems pump american turbine pump water fluids pump	1	2	1	0	3	1	4	6	5	8	8	1	1	11	6	4	14	16	8
ftc gov opa motorup shtm motor corporation inc agency alleges ads motor oil motor engine wear percent adhesive engine	engineering	ftc gov opa motorup shtm motor corporation agency alleges ads motor oil motor engine wear percent adhesive engine	1	0	1	0	3	0	4	6	5	4	8	1	1	11	6	4	14	16	8
bergey bergey windpower world leading supplier wind america residential business wind turbine bergey windpower world leading suppliers wind turbines	engineering	bergey bergey windpower leading supplier wind america residential business wind turbine bergey windpower leading suppliers wind turbines	1	0	1	0	3	0	4	6	5	8	8	1	1	11	5	4	14	16	2
marineturbine mtt- turbine fire pumps turbine motorcycles turbine boats marine turbine technologies global leader non-aviation turbine application	engineering	marineturbine mtt turbine fire pumps turbine motorcycles turbine boats marine turbine technologies global leader aviation turbine application	1	2	1	0	3	0	4	6	5	8	8	1	1	11	5	4	14	16	8
wrenturbines wren turbines ltd world leaders miniature turbine technology wren turbines ltd world leaders miniature turbine technology	engineering	wrenturbines wren turbines leaders miniature turbine technology wren turbines leaders miniature turbine technology	1	2	1	0	3	0	4	6	5	8	8	1	1	11	6	4	14	16	8
igti asme asme international gas turbine institute gateway gas portal-type resource world gas turbine community offshoot american society mechanical engineers news	engineering	igti asme asme international gas turbine institute gateway gas portal type resource gas turbine community offshoot american society mechanical engineers news	1	0	1	0	3	0	4	6	5	8	8	1	1	11	6	4	14	16	8
gas turbines nye thermodynamics gas turbine gasturbine turboshaft turbine boat helicopter turbine arneson surface drive unlimited hydro surface pierceing drive	engineering	gas turbines nye thermodynamics gas turbine gasturbine turboshaft turbine boat helicopter turbine arneson surface drive unlimited hydro surface pierceing drive	1	2	1	0	3	0	4	6	5	8	8	1	1	11	6	4	14	16	8
blue pacific products turbinevideo default turbine video encoder turbine video encoder converts virtually video format streaming flash share video publishing web beautiful	engineering	blue pacific products turbinevideo default turbine video encoder turbine video encoder converts virtually video format streaming flash share video publishing web beautiful	1	2	1	0	3	0	4	8	6	2	6	4	9	13	11	10	7	12	16
turbine asheron call home page turbine games asheron call dark majesty website features news monthly events patch updates bug report developers	engineering	turbine asheron call turbine games asheron call dark majesty website features news monthly events patch updates bug report developers	1	2	1	0	3	1	4	6	5	8	6	1	1	11	5	4	3	12	2
history rochester edu steam parsons steam turbine contents steam turbine alex richardson author evolution parsons steam turbine --a deals comprehensively subject	engineering	history rochester steam parsons steam turbine contents steam turbine alex richardson author evolution parsons steam turbine deals comprehensively subject	1	2	1	0	3	0	4	6	5	8	8	1	1	11	6	4	14	16	8
dieselpub diesel gas turbine publications diesel gas turbine engine publications products technology industry news markets engine power	engineering	dieselpub diesel gas turbine publications diesel gas turbine engine publications products technology industry news markets engine power	1	2	1	0	3	0	4	6	5	8	8	1	1	11	6	4	14	16	8
capstoneturbine capstone turbine micro turbine distribution information industry news events power generation system supplier	engineering	capstoneturbine capstone turbine micro turbine distribution industry news events power generation system supplier	1	2	1	0	3	0	4	6	5	8	8	1	1	11	5	4	14	16	2
eere energy gov windandhydro wind how wind hydropower technologies program wind turbines wind turbines convert kinetic energy wind mechanical power mechanical power tasks grinding grain	engineering	eere energy gov windandhydro wind wind hydropower technologies program wind turbines wind turbines convert kinetic energy wind mechanical power mechanical power tasks grinding grain	1	0	1	0	3	0	4	6	5	8	8	1	1	11	5	4	14	16	8
science howstuffworks turbine howstuffworks gas turbine engines wonder jet engine cruising feet jets helicopters power plants class	engineering	science howstuffworks turbine howstuffworks gas turbine engines jet engine cruising feet jets helicopters power plants class	1	2	1	0	3	1	4	6	5	8	8	1	1	11	6	4	14	16	8
freeenergynews directory devices teslaturbine index tesla turbine bladeless boundary disc directory blades friction tesla turbine parallel spaced disks tap viscosity aerodynamic skin adhesion effect resists	engineering	freeenergynews directory devices teslaturbine tesla turbine bladeless boundary disc directory blades friction tesla turbine parallel spaced disks tap viscosity aerodynamic skin adhesion resists	1	0	1	0	3	0	4	6	5	8	8	1	1	11	5	4	14	16	8
faqs faqs autos gasoline faq part gasoline faq answers gasoline -related question	engineering	faqs faqs autos gasoline faq gasoline faq answers gasoline question	1	2	1	0	3	3	4	6	9	4	8	1	2	9	6	4	8	17	8
hubbell electrical hubbell electrical products leading supplier electrical products customer base build business service distribution	engineering	hubbell electrical hubbell electrical products leading supplier electrical products customer base build business service distribution	1	0	1	0	3	0	4	6	5	4	8	1	1	11	5	4	14	1	2
gasolinegallery gasoline kustom kulture brow hot rod urban surf southern california kustom kulture brow gallery shop hot rod art stickers buttons posters books prints editions	engineering	gasolinegallery gasoline kustom kulture brow hot rod urban surf southern california kustom kulture brow gallery shop hot rod art stickers buttons posters books prints editions	1	2	1	2	0	1	1	8	6	0	6	0	9	7	2	9	3	17	9
inventors about library inventors blcar automobile history history cars engines history automobile car inventions engines gasoline air conditioning	engineering	inventors library inventors blcar automobile history history cars engines history automobile car inventions engines gasoline air conditioning	1	2	1	0	3	1	4	6	5	8	8	1	1	11	6	4	14	16	8
nadaguides car prices car values car reviews car buying nada guides car prices car values research car reviews specs safety ratings compare cars car buying car	engineering	nadaguides car prices car values car reviews car buying nada guides car prices car values car reviews specs safety ratings compare cars car buying car	1	2	1	0	3	1	4	6	6	0	8	1	2	7	6	9	3	16	9
automobiles automobiles buy lease sell financing quotes automobiles com dedicated comprehensive websites internet buying selling information leasing help	engineering	automobiles automobiles buy lease sell financing quotes automobiles dedicated comprehensive websites internet buying selling leasing	1	2	1	0	3	1	4	6	5	0	8	1	2	7	6	9	3	16	9
edmunds car prices car pricing car reviews edmunds car guides reviews wholesale retail pricing information advice automobile purchasing ownership	engineering	edmunds car prices car pricing car reviews edmunds car guides reviews wholesale retail pricing advice automobile purchasing ownership	1	2	1	0	3	1	4	6	6	0	8	1	2	7	6	9	3	16	9
automobile automobile com automobile automobile automobile com automobile automobile classifieds automobile directory automobile news automobile reviews	engineering	automobile automobile automobile automobile automobile automobile automobile classifieds automobile directory automobile news automobile reviews	1	2	1	0	3	1	4	6	5	0	8	1	2	7	6	9	3	17	8
wikipedia wiki history the automobile history automobile wikipedia encyclopedia vehicles automobiles demonstrated marked introduction gasoline powered combustion	engineering	wikipedia wiki history automobile history automobile wikipedia encyclopedia vehicles automobiles demonstrated marked introduction gasoline powered combustion	1	2	1	0	3	1	4	6	5	8	8	1	1	11	6	4	14	16	8
wikipedia wiki automobile automobile wikipedia encyclopedia automobile motor car shortened car wheeled passenger vehicle carries motor definitions	engineering	wikipedia wiki automobile automobile wikipedia encyclopedia automobile motor car shortened car wheeled passenger vehicle carries motor definitions	1	2	1	0	3	1	4	6	5	8	8	1	1	11	6	9	14	16	8
automobilemag cars car reviews concept cars auto automobile automobile magazine website features news road tests car buying leasing guide live auto coverage	engineering	automobilemag cars car reviews concept cars auto automobile automobile magazine website features news road tests car buying leasing guide live auto coverage	1	2	1	0	3	1	4	6	5	0	2	1	2	7	6	9	3	16	9
fireballsandtsunami fireballs tsunami filed film speculation jenny dreamed playing game pac-man dingy arcade clint eastwood	engineering	fireballsandtsunami fireballs tsunami filed film speculation jenny dreamed playing game pac dingy arcade clint eastwood	0	1	0	2	4	5	1	0	1	10	2	12	9	6	11	2	10	7	1
deves deves piston rings automobiles motorcycles antiques classics deves manufactures piston rings model car motorcycle	engineering	deves deves piston rings automobiles motorcycles antiques classics deves manufactures piston rings model car motorcycle	1	2	1	0	3	1	4	6	5	0	8	1	1	11	6	9	3	16	8
grantpistonrings grant piston rings grant piston rings premium quality engine automotive industry corners world	engineering	grantpistonrings grant piston rings grant piston rings premium quality engine automotive industry corners	1	0	1	0	3	1	4	6	5	4	8	1	1	11	5	9	3	16	8
gastmfg piston gast manufacturing inc piston air compressors vacuum pumps withstand aluminum pistons cylinder cylinder heads ensure excellent corrosion	engineering	gastmfg piston gast manufacturing piston air compressors vacuum pumps withstand aluminum pistons cylinder cylinder heads ensure excellent corrosion	1	0	1	0	3	1	4	6	5	4	8	1	1	11	6	9	14	16	8
piston digital garage motorcycle gallery highlights motorcycles digital garage rice seattle garage piston com	engineering	piston digital garage motorcycle gallery highlights motorcycles digital garage rice seattle garage piston	1	2	1	0	3	1	4	8	9	4	6	1	1	14	2	9	3	16	9
webreference lesson animation workshop lesson max nurbs--the piston project collaborating dino giannini outstanding talents cogswell college model piston automobile engine	engineering	webreference lesson animation workshop lesson max nurbs piston project collaborating dino giannini outstanding talents cogswell college model piston automobile engine	1	2	1	0	3	1	4	6	5	4	8	1	1	11	5	9	3	16	8
sports espn nba clubhouse team det espn detroit pistons news schedule players scores stats detroit pistons schedule players stats photos rumors highlights espn com	engineering	sports espn nba clubhouse team det espn detroit pistons news schedule players scores stats detroit pistons schedule players stats photos rumors highlights espn	0	1	0	4	4	6	5	3	4	3	9	6	10	0	9	6	1	13	12
totalseal seal piston rings manufacturer piston rings racing street engines seal engine development center custom engines street racing marine	engineering	totalseal seal piston rings manufacturer piston rings racing street engines seal engine development center custom engines street racing marine	1	2	1	0	3	1	4	6	5	0	8	1	1	11	6	9	3	16	8
onagocag piston firepiston care creation piston gasket greased help seal travel piston	engineering	onagocag piston firepiston care creation piston gasket greased seal travel piston	1	0	1	0	3	1	4	8	5	4	8	1	1	14	5	9	3	16	8
classical music comp lst piston classical net repertoire piston walter piston grandson italian seaman family pistone born maine family settled boston	engineering	classical music comp lst piston classical net repertoire piston walter piston grandson italian seaman family pistone born maine family settled boston	1	2	1	0	3	1	4	8	5	0	8	1	1	11	5	10	3	5	9
https medschool vanderbilt edu facultydata files faculty vumc research display faculty rizzo piston high-contrast imaging fluorescent protein fret rizzo mark piston regulation beta cell glucokinase	engineering	https medschool vanderbilt facultydata files faculty vumc display faculty rizzo piston contrast imaging fluorescent protein fret rizzo mark piston regulation beta cell glucokinase	1	0	1	0	3	1	4	4	5	4	8	1	1	8	5	9	8	5	8
piston piston specializing immigration law association professional corporations practicing field immigration nationality law	engineering	piston piston specializing immigration law association professional corporations practicing field immigration nationality law	1	2	1	0	2	3	4	8	9	4	6	5	1	11	2	4	8	5	8
pistonheads pistonheads com speed matters daily news features	engineering	pistonheads pistonheads speed matters daily news features	1	1	0	0	4	6	2	1	3	0	9	6	4	0	8	6	7	3	12
jersey uoregon edu vlab piston index virtual laboratory ideal gas law applet illustrating ideal gas law action piston pressure chamber ideal gas	engineering	jersey uoregon vlab piston virtual laboratory ideal gas law applet illustrating ideal gas law action piston pressure chamber ideal gas	1	2	1	0	3	3	4	4	5	4	8	1	1	11	6	4	14	16	8
pistonsbar pistons bar pistons bar beach gay bar leather bear gay motorcycle community decade	engineering	pistonsbar pistons bar pistons bar beach gay bar leather bear gay motorcycle community decade	0	1	0	2	3	1	1	8	2	0	6	1	13	14	2	5	3	5	19
toyota museum index toyota automobile museum exhibits history automobile japanese american european cars virtual tour contact information	engineering	toyota museum toyota automobile museum exhibits history automobile japanese american european cars virtual tour contact	1	2	1	0	3	1	4	6	5	8	8	1	2	11	6	4	14	17	8
automobile sae sae international automobile technology sae international premier membership society dedicated advancing automobile automotive passenger car engineering	engineering	automobile sae sae international automobile technology sae international premier membership society dedicated advancing automobile automotive passenger car engineering	1	2	1	0	3	1	4	6	5	8	8	1	1	11	6	4	14	17	8
aaa aaa american automobile association maps emergency road service aaa assist travel lodging auto buying leasing renting repair loans credit cards	engineering	aaa aaa american automobile association maps emergency road service aaa assist travel lodging auto buying leasing renting repair loans credit cards	1	2	1	0	3	1	4	6	2	4	2	1	2	7	6	9	3	16	10
automobileindia india automobile india automobile finance automobile india automobileindia com information india automobile india automobile finance india car sales car rentals india india automobile	engineering	automobileindia india automobile india automobile finance automobile india automobileindia india automobile india automobile finance india car sales car rentals india india automobile	1	2	1	0	3	1	1	6	6	0	8	1	2	7	6	9	3	17	9
hubbell raco raco quality electrical boxes covers fittings floor boxes metallic nonmetallic electrical fittings floor boxes south bend indiana raco brand hubbell electrical products platform	engineering	hubbell raco raco quality electrical boxes covers fittings floor boxes metallic nonmetallic electrical fittings floor boxes south bend indiana raco brand hubbell electrical products platform	1	0	1	0	3	0	4	6	5	4	8	1	1	11	5	4	14	1	2
smcelectrical smc electrical products sheet metal fabrication transit electronics mining electronics control systems	engineering	smcelectrical smc electrical products sheet metal fabrication transit electronics mining electronics control systems	1	0	1	0	3	0	4	6	5	4	8	1	1	11	5	4	14	1	2
ecpzone electrical contracting products ecpzone com product ecpzone product information authority decision makers nation leading electrical contracting firms covering lighting power quality	engineering	ecpzone electrical contracting products ecpzone product ecpzone product authority decision makers nation leading electrical contracting firms covering lighting power quality	1	0	1	0	3	0	4	6	5	4	8	1	1	11	5	4	14	1	2
hpm electrical products electrical accessories home commercial hpm industries wholly australian-owned manufacturer distributor electrical products electronic devices products	engineering	hpm electrical products electrical accessories commercial hpm industries wholly australian owned manufacturer distributor electrical products electronic devices products	1	0	1	0	3	0	4	6	5	4	8	1	1	11	5	4	14	1	2
tnb betts betts manufacturer electrical hvac lighting utility products	engineering	tnb betts betts manufacturer electrical hvac lighting utility products	1	0	1	0	3	0	4	6	5	4	8	1	1	11	5	4	14	1	2
mennekes mennekes plugs world mennekes manufacturers listed csa certified products product iec pin sleeve wiring devices	engineering	mennekes mennekes plugs mennekes manufacturers listed csa certified products product iec pin sleeve wiring devices	1	0	1	0	3	0	4	6	5	4	8	1	1	11	5	4	14	1	2
crouse hinds cooper crouse-hinds world leading manufacturer cooper crouse-hinds world leading manufacturer electrical products commercial industrial hazardous environments	engineering	crouse hinds cooper crouse hinds leading manufacturer cooper crouse hinds leading manufacturer electrical products commercial industrial hazardous environments	1	0	1	0	3	0	4	6	5	4	8	1	1	11	5	4	14	1	2
hubbell hubbell incorporated manufactures electrical products commercial industrial markets	engineering	hubbell hubbell incorporated manufactures electrical products commercial industrial markets	1	0	1	0	3	0	4	6	5	4	8	1	1	11	5	4	14	1	2
gardnerbender gardner bender electrical products tools electrical products professionals electricians tools contractor electrical products electrical wire connectors wire connecting electrical wire lugs	engineering	gardnerbender gardner bender electrical products tools electrical products professionals electricians tools contractor electrical products electrical wire connectors wire connecting electrical wire lugs	1	0	1	0	3	0	4	6	5	4	8	1	1	11	5	4	14	1	2
cherrycorp cherry switches sensors keyboards automotive modules contact cherry electrical products north america keyboard switch sensor products	engineering	cherrycorp cherry switches sensors keyboards automotive modules contact cherry electrical products north america keyboard switch sensor products	1	0	1	0	3	0	4	6	5	4	8	1	1	11	5	4	14	1	2
aosmithmotors electrical products company build electric motors electric motor job	engineering	aosmithmotors electrical products company build electric motors electric motor job	1	0	1	0	3	0	4	6	5	4	8	1	1	11	5	4	14	1	2
schirmer default tabid state composerid walter piston biography key discography links	engineering	schirmer default tabid composerid walter piston biography key discography links	1	2	1	0	3	1	4	8	9	10	8	10	1	14	5	10	3	5	9
squared square brand schneider electric square market-leading global brand schneider electric nema electrical distribution industrial control products systems services	engineering	squared square brand schneider electric square market leading global brand schneider electric nema electrical distribution industrial control products systems services	1	0	1	0	3	0	4	6	5	4	8	1	1	11	5	4	14	1	2
carlon carlon industry-leading manufacturer marketer lamson sessions recalls floor electrical outlets shock electrocution hazards information lamson home products recall	engineering	carlon carlon industry leading manufacturer marketer lamson sessions recalls floor electrical outlets shock electrocution hazards lamson products recall	1	0	1	0	3	0	4	6	5	4	8	1	1	11	5	4	14	1	2
solutions wps portal melectrical home electrical information electrical products visit literature selector access brochures guides	engineering	solutions wps portal melectrical electrical electrical products visit literature selector access brochures guides	1	0	1	0	3	0	4	6	5	4	8	1	1	11	5	4	14	1	2
midwestelectric midwest electric products inc midwest electric products experience manufacturing quality outdoor electrical equipment	engineering	midwestelectric midwest electric products midwest electric products experience manufacturing quality outdoor electrical equipment	1	0	1	0	3	0	4	6	5	4	8	1	1	11	5	4	14	1	2
automuseum national automobile museum features antique vintage classic vehicles photos galleries calendar events memberships	engineering	automuseum national automobile museum features antique vintage classic vehicles photos galleries calendar events memberships	1	2	1	0	3	1	1	6	6	0	2	1	2	7	6	9	3	17	9
ftc gov bcp menu auto shtm ftc bureau consumer protection consumer information automobiles articles tips worksheets educate consumers auto buying ownership mistakes	engineering	ftc gov bcp menu auto shtm ftc bureau consumer protection consumer automobiles articles tips worksheets educate consumers auto buying ownership mistakes	1	0	1	0	3	0	4	6	5	4	8	1	1	11	6	9	14	16	8
autoquarterly automobile quarterly magazine features antique automobile marques biographies index subscription information	engineering	autoquarterly automobile quarterly magazine features antique automobile marques biographies subscription	1	2	1	0	3	1	4	6	6	0	8	1	2	7	6	9	3	17	9
nada national automobile dealers association resource auto retail professionals industry trends education training career information	engineering	nada national automobile dealers association resource auto retail professionals industry trends education training career	1	2	1	0	3	0	4	6	2	4	8	1	6	7	6	0	2	16	8
autoalliance alliance automobile manufacturers public policy issues motor vehicle safety	engineering	autoalliance alliance automobile manufacturers public policy issues motor vehicle safety	1	2	1	0	3	0	4	6	5	0	8	1	1	11	6	4	14	16	8
greatachievements automobile engineering achievements automobile automobile timeline assembly line developments essay donald petersen	engineering	greatachievements automobile engineering achievements automobile automobile timeline assembly developments essay donald petersen	1	2	1	0	3	1	4	6	5	8	8	1	1	11	6	4	14	17	8
ideafinder history inventions automobile automobile history invention automobile fascinating invention automobile inventors karl benz amedee bollee nicolas cugnot gottlieb daimler henry ford	engineering	ideafinder history inventions automobile automobile history automobile fascinating automobile inventors karl benz amedee bollee nicolas cugnot gottlieb daimler henry ford	1	2	1	0	3	1	4	6	5	8	8	1	1	11	6	4	14	16	8
inventors about library weekly aacarsgasa history automobile gas engines history combustion engine gas powered cars inventors nicolas cugnot nicolaus otto karl benz gottlieb	engineering	inventors library weekly aacarsgasa history automobile gas engines history combustion engine gas powered cars inventors nicolas cugnot nicolaus otto karl benz gottlieb	1	2	1	0	3	1	4	6	5	8	8	1	1	11	6	4	14	16	8
mcgillelectrical mcgill electrical electrical safety products lighting products mcgill electrical manufacturer line electrical safety products mcgill specializes production line	engineering	mcgillelectrical mcgill electrical electrical safety products lighting products mcgill electrical manufacturer electrical safety products mcgill specializes production	1	0	1	0	3	0	4	6	5	4	8	1	1	11	5	4	14	1	2
wiseco manufacturer performance forged pistons performance wiseco piston inc world class manufacturer hi-performance forged pistons snowmobile motorcycle atv personal watercraft outboard marine	engineering	wiseco manufacturer performance forged pistons performance wiseco piston class manufacturer performance forged pistons snowmobile motorcycle atv personal watercraft outboard marine	1	2	1	0	3	1	4	6	5	0	8	1	1	11	6	9	3	16	8
piston rubyforge piston vendor branch management piston utility eases vendor branch management svn externals copy files modify	engineering	piston rubyforge piston vendor branch management piston utility eases vendor branch management svn externals copy files modify	1	0	1	0	3	3	4	6	5	4	8	1	1	14	5	9	8	16	8
wikipedia wiki walter piston walter piston wikipedia encyclopedia piston born rockland maine father father sailor antonio pistone anthony piston america	engineering	wikipedia wiki walter piston walter piston wikipedia encyclopedia piston born rockland maine father father sailor antonio pistone anthony piston america	1	2	1	0	3	1	4	8	5	0	8	1	1	11	5	10	3	5	9
wikipedia wiki ole automation ole automation wikipedia encyclopedia microsoft windows applications programming ole automation renamed microsoft automation	engineering	wikipedia wiki ole automation ole automation wikipedia encyclopedia microsoft windows applications programming ole automation renamed microsoft automation	1	0	1	0	3	0	4	6	5	8	8	1	1	11	5	4	14	1	2
dac design automation conference dac design automation conference dac premier electronic design automation eda silicon solution event dac	engineering	dac design automation conference dac design automation conference dac premier electronic design automation eda silicon solution event dac	1	0	1	0	3	0	4	6	5	4	8	1	1	11	5	4	14	1	2
isa instrumentation systems automation society international nonprofit educational organization promoting advancement theory design manufacture sensors instruments	engineering	isa instrumentation systems automation society international nonprofit educational organization promoting advancement theory design manufacture sensors instruments	1	2	1	0	3	0	4	6	5	4	8	1	1	11	5	4	14	1	2
ieee ras ieee robotics automation society ieee robotics automation society applied theoretical issues robotics automation	engineering	ieee ras ieee robotics automation society ieee robotics automation society applied theoretical issues robotics automation	1	0	1	0	3	0	4	6	5	4	8	1	1	11	5	4	14	1	2
metsoautomation metso automation level automation solutions systems process automation information management solutions	engineering	metsoautomation metso automation level automation solutions systems process automation management solutions	1	0	1	0	3	0	4	6	5	4	8	1	1	11	5	4	14	1	2
automationalley automation alley southeast michigan technology cluster technology cluster promotes productivity innovation business growth	engineering	automationalley automation alley southeast michigan technology cluster technology cluster promotes productivity innovation business growth	1	2	1	2	3	0	2	6	5	8	8	1	1	1	2	4	11	5	2
automationdirect buy industrial controls--low prices shipping automationdirect industrial control products plcs drives operator interfaces enclosures pushbuttons sensors motor controls power	engineering	automationdirect buy industrial controls low prices shipping automationdirect industrial control products plcs drives operator interfaces enclosures pushbuttons sensors motor controls power	1	0	1	0	3	0	4	6	5	4	8	1	1	11	5	4	14	1	2
honeywell acs home honeywell automation control solutions sensing sensors switches home comfort security home security smoke detection fire systems fire detection fire alarm fire alarm panels notification	engineering	honeywell acs honeywell automation control solutions sensing sensors switches comfort security security smoke detection fire systems fire detection fire alarm fire alarm panels notification	1	0	1	2	3	0	4	6	5	4	8	1	1	11	5	4	14	1	2
itcompany inforetriever automate automation section covers internet resources help automation system professionals computing information computer lab	engineering	itcompany inforetriever automate automation covers internet resources automation system professionals computing computer lab	1	0	1	0	3	0	4	6	5	4	8	1	1	11	5	4	14	1	2
automationworld automation world gary updates emerson wireless information addresses automation suppliers machine programming brain	engineering	automationworld automation gary updates emerson wireless addresses automation suppliers machine programming brain	1	0	1	0	3	0	4	6	5	4	8	1	1	11	5	4	14	1	2
rockwellautomation rockwell automation manufactures rugged industrial flat panel monitors crts industrial computers factory automation applications	engineering	rockwellautomation rockwell automation manufactures rugged industrial flat panel monitors crts industrial computers factory automation applications	1	0	1	0	3	0	4	6	5	4	8	1	1	11	5	4	14	1	2
managingautomation managing automation online integrated manufacturing technology information industry news online subscription service	engineering	managingautomation managing automation online integrated manufacturing technology industry news online subscription service	1	0	1	0	3	0	4	6	5	4	8	1	1	11	5	4	14	1	2
automation automation com industrial automation factory process news articles products suppliers systems integrators jobs resources industrial automation process automation motion control	engineering	automation automation industrial automation factory process news articles products suppliers systems integrators jobs resources industrial automation process automation motion control	1	0	1	0	3	0	4	6	5	4	8	1	1	11	5	4	14	1	2
gasolinealleyantiques antique toys vintage collectibles sale gasoline alley discontinued model kits scale diecast cars antique collectible toys sports memorabilia yo-yos model kits comic character merchandise boomerbalia	engineering	gasolinealleyantiques antique toys vintage collectibles sale gasoline alley discontinued model kits scale diecast cars antique collectible toys sports memorabilia yo yos model kits comic character merchandise boomerbalia	1	2	1	0	3	1	1	6	6	0	2	1	2	7	6	9	3	17	9
gasolineheart gasoline heart gasoline heart gasoline heart gasoline heart	engineering	gasolineheart gasoline heart gasoline heart gasoline heart gasoline heart	1	0	1	0	3	0	7	7	6	4	11	9	13	1	10	8	4	15	14
amazon gasoline theory deadman amazon com gasoline music theory deadman amazon com gasoline music theory deadman theory deadman	engineering	amazon gasoline theory deadman amazon gasoline music theory deadman amazon gasoline music theory deadman theory deadman	1	2	1	0	3	3	1	6	5	0	1	9	13	11	2	4	3	17	11
cdc gov niosh npg npgd niosh document pocket guide chemical hazards motor fuel motor spirits natural gasoline petrol mixture volatile hydrocarbons paraffins cycloparaffins aromatics	engineering	cdc gov niosh npg npgd niosh document pocket guide chemical hazards motor fuel motor spirits natural gasoline petrol mixture volatile hydrocarbons paraffins cycloparaffins aromatics	1	0	1	0	3	0	4	6	5	8	8	1	1	11	6	4	14	16	8
money cnn magazines fortune fortune archive index beat cost gasoline forever don answer america gasoline addiction hood car tauruses explorers	engineering	money cnn magazines fortune fortune archive beat cost gasoline forever don answer america gasoline addiction hood car tauruses explorers	1	2	1	0	3	1	1	6	9	0	7	9	2	7	6	8	3	17	14
epa gov otaq rfg reformulated gasoline gasoline fuels fuels fuel additives epa collection sheets technical documents computer models data congressional testimony materials reformulation	engineering	epa gov otaq rfg reformulated gasoline gasoline fuels fuels fuel additives epa collection sheets technical documents computer models data congressional testimony materials reformulation	1	2	1	0	3	0	4	6	5	8	8	1	1	11	6	4	14	16	8
saintgasoline saint gasoline comiblog webcomic blog intellectuals juvenile delinquents don moron enjoy helps	engineering	saintgasoline saint gasoline comiblog webcomic blog intellectuals juvenile delinquents don moron enjoy helps	1	2	1	0	3	0	1	6	9	0	6	0	13	11	2	4	3	16	8
pubs acs cen whatstuff stuff gasoline stuff gasoline price gasoline record levels people curious pumping	engineering	pubs acs cen whatstuff stuff gasoline stuff gasoline price gasoline record levels people curious pumping	1	2	1	2	3	0	4	6	9	0	11	9	1	1	6	4	14	15	8
faqs faqs autos gasoline faq autos gasoline faq index subject gasoline faq maintainer bruce hamilton hamilton irl cri posted	engineering	faqs faqs autos gasoline faq autos gasoline faq subject gasoline faq maintainer bruce hamilton hamilton irl cri posted	1	2	1	0	3	3	4	6	9	4	8	1	2	9	6	4	8	17	8
gasbuddy gasbuddy com gas prices usa canada real-time gasoline prices canada usa	engineering	gasbuddy gasbuddy gas prices usa canada real time gasoline prices canada usa	1	2	1	0	3	1	1	3	9	4	7	1	2	13	2	6	8	7	14
tonto eia doe gov oog info gdu gasdiesel gasoline diesel fuel update gasoline diesel fuel prices charted region country listed	engineering	tonto eia doe gov oog info gdu gasdiesel gasoline diesel fuel update gasoline diesel fuel prices charted region country listed	1	2	1	0	3	0	4	6	9	2	8	1	13	11	3	4	8	15	18
wikipedia wiki automation automation wikipedia encyclopedia automation ancient greek self dictated roboticization industrial automation numerical control control systems computers	engineering	wikipedia wiki automation automation wikipedia encyclopedia automation ancient greek dictated roboticization industrial automation numerical control control systems computers	1	0	1	0	3	0	4	6	5	4	8	1	1	11	5	4	14	1	2
inventors about gstartinventions gasoline history gasoline processes agents invented quality gasoline	engineering	inventors gstartinventions gasoline history gasoline processes agents invented quality gasoline	1	2	1	0	3	0	4	6	5	8	8	1	1	11	6	4	14	16	8
oksolar cart cat automation eprocurement solutions electronics automation eprocurement solutions electronics oksolar market-leading distributor manufacturer electronic components systems value-added services	engineering	oksolar cart cat automation eprocurement solutions electronics automation eprocurement solutions electronics oksolar market leading distributor manufacturer electronic components systems services	1	0	1	0	3	0	4	6	5	4	8	1	1	11	5	4	14	1	2
intelligent automation inc design engineer build install custom automation manufacturing equipment robotic vision guided assembly processing systems	engineering	intelligent automation design engineer build install custom automation manufacturing equipment robotic vision guided assembly processing systems	1	0	1	0	3	0	4	6	5	4	8	1	1	11	5	4	14	1	2
wikipedia wiki piston piston wikipedia encyclopedia piston lubricated sliding shaft fits cylinder volume enclosed	engineering	wikipedia wiki piston piston wikipedia encyclopedia piston lubricated sliding shaft fits cylinder volume enclosed	1	0	1	0	3	1	4	6	5	4	8	1	1	11	6	9	14	16	8
news bbc science nature stm bbc news science nature revolutionary jet engine tested jet engine flight london sydney hours tested australia	engineering	news bbc science nature stm bbc news science nature revolutionary jet engine tested jet engine flight london sydney hours tested australia	1	2	1	3	3	1	7	6	7	5	8	1	11	12	6	11	10	16	8
jet engine lab technion turbo jet engine research laboratories shirley tark turbo jet engine research laboratories thefaculty aerospace engineering technion israel institute technology	engineering	jet engine lab technion turbo jet engine laboratories shirley tark turbo jet engine laboratories thefaculty aerospace engineering technion israel institute technology	1	2	1	0	3	0	4	6	5	8	8	1	1	11	6	4	14	16	8
inventors about library inventors bljetengine history jet engine sir frank whittle hans von ohain hans von ohain sir frank whittle co-inventors jet engine von ohain whittle jet	engineering	inventors library inventors bljetengine history jet engine sir frank whittle hans von ohain hans von ohain sir frank whittle inventors jet engine von ohain whittle jet	1	2	1	0	3	1	4	6	5	8	8	1	1	11	6	4	14	16	8
support microsoft service pack microsoft jet microsoft jet database engine release level download instructions setup instructions	engineering	support microsoft service pack microsoft jet microsoft jet database engine release level download instructions setup instructions	1	2	1	0	3	0	4	6	5	8	8	1	1	11	6	4	14	16	8
asciimation beer jet powered beer cooler jet engine simplest combustor fuel burnt heat yes jet engine wonder fit	engineering	asciimation beer jet powered beer cooler jet engine simplest combustor fuel burnt heat jet engine fit	1	2	1	0	3	0	4	6	5	8	8	1	1	11	6	4	14	16	8
wikipedia wiki microsoft jet database engine microsoft jet database engine wikipedia encyclopedia microsoft jet database engine database engine microsoft products database engine component	engineering	wikipedia wiki microsoft jet database engine microsoft jet database engine wikipedia encyclopedia microsoft jet database engine database engine microsoft products database engine component	1	2	1	0	3	0	4	6	5	8	8	1	1	11	6	4	14	16	8
engadget man sticks jet engine kayak somehow survives sticks jet engine kayak survives engadget incidentally jet engine anymore jet ski jet engine craft equipped yamaha jet drive ice hooked	engineering	engadget sticks jet engine kayak survives sticks jet engine kayak survives engadget incidentally jet engine jet ski jet engine craft equipped yamaha jet drive ice hooked	1	2	1	0	3	1	4	6	5	8	8	1	1	11	6	4	14	16	8
britannica article jet engine jet engine encyclopaedia britannica jet engine class internal-combustion engines propel aircraft rearward discharge jet fluid hot exhaust	engineering	britannica article jet engine jet engine encyclopaedia britannica jet engine class internal combustion engines propel aircraft rearward discharge jet fluid hot exhaust	1	2	1	0	3	1	4	6	5	8	8	1	1	11	6	4	14	16	8
instructables eea aaur instructables build jet engine building jet engine appropriate safety precautions machinery	engineering	instructables eea aaur instructables build jet engine building jet engine safety precautions machinery	1	2	1	0	3	0	4	6	5	8	8	1	1	11	6	4	14	16	8
pulse jets home jet pulsejet engine home jet engine turbo charger pulsejet plans	engineering	pulse jets jet pulsejet engine jet engine turbo charger pulsejet plans	1	2	1	0	3	1	4	6	5	8	8	1	1	11	6	4	14	16	8
brooks manufacturing efficiency semiconductor brooks automation factory automation equipment semiconductor manufacturing	engineering	brooks manufacturing efficiency semiconductor brooks automation factory automation equipment semiconductor manufacturing	1	0	1	0	3	0	4	6	5	4	8	1	1	11	5	4	14	1	2
ronpatrickstuff jet beetle throttle jet engine gear selector helicopter turboshaft engine converted jet engine	engineering	ronpatrickstuff jet beetle throttle jet engine gear selector helicopter turboshaft engine converted jet engine	1	2	1	0	3	1	4	6	5	8	8	1	1	11	6	4	14	16	8
geae education engines engines engine education aviation engines flash download quicktime olympic partner aviation home engines services systems	engineering	geae education engines engines engine education aviation engines flash download quicktime olympic partner aviation engines services systems	1	2	1	0	3	0	4	6	5	8	8	1	1	11	6	4	14	16	8
rolls royce education schools how things work journey flash rolls-royce journey jet engine	engineering	rolls royce education schools journey flash rolls royce journey jet engine	1	2	1	0	3	1	4	6	5	5	8	1	5	11	6	4	14	16	8
pfranc projects turbine top larrys homemade gas turbine jet engine sept sal diy home jet engine sal cool diy turbine engine cad drawings	engineering	pfranc projects turbine top larrys homemade gas turbine jet engine sept sal diy jet engine sal cool diy turbine engine cad drawings	1	2	1	0	3	0	4	6	5	8	8	1	1	11	6	4	14	16	8
inventors about library inventors blhowajetengineworks jet engine jet engine operates application sir isaac newton law physics	engineering	inventors library inventors blhowajetengineworks jet engine jet engine operates application sir isaac newton law physics	1	2	1	0	3	1	4	6	5	8	8	1	1	11	6	4	14	16	8
howstuffworks turbine howstuffworks gas turbine engines wonder jet engine cruising feet jets helicopters power plants class	engineering	howstuffworks turbine howstuffworks gas turbine engines jet engine cruising feet jets helicopters power plants class	1	2	1	0	3	1	4	6	5	8	8	1	1	11	6	4	14	16	8
aardvark pjet turbinenuts shtml crazy jet engine invention jet engine people crazier strapping	engineering	aardvark pjet turbinenuts shtml crazy jet engine jet engine people crazier strapping	1	2	1	0	3	1	4	6	5	8	8	1	1	11	6	4	14	16	8
aardvark pjet pulse jet engine information building pulsejet turbojet engine	engineering	aardvark pjet pulse jet engine building pulsejet turbojet engine	1	2	1	0	3	1	4	6	5	8	8	1	1	11	6	4	14	16	8
wikipedia wiki jet engine jet engine wikipedia encyclopedia jet engine engine discharges jet fluid generate thrust accordance newton law motion	engineering	wikipedia wiki jet engine jet engine wikipedia encyclopedia jet engine engine discharges jet fluid generate thrust newton law motion	1	2	1	0	3	1	4	6	5	8	8	1	1	11	6	4	14	16	8
practicalautomation practical automation inc thermal printers kiosk printers line kiosk printers airlines boarding	engineering	practicalautomation practical automation thermal printers kiosk printers kiosk printers airlines boarding	1	0	1	2	3	0	4	6	0	4	5	11	8	3	2	4	14	12	2
rockwell automation allen-bradley allen-bradley products rockwell automation integrated control information platforms intelligent motor control industrial components	engineering	rockwell automation allen bradley allen bradley products rockwell automation integrated control platforms intelligent motor control industrial components	1	0	1	0	3	0	4	6	5	4	8	1	1	11	5	4	14	1	2
smarthome smarthome home automation remote control lighting home automation protocol home networking remote control lighting security	engineering	smarthome smarthome automation remote control lighting automation protocol networking remote control lighting security	1	0	1	0	3	0	4	6	5	4	8	1	1	11	5	4	14	1	2
junkyardjet junkyard turbojet engine jet engine jet engine junkyard	engineering	junkyardjet junkyard turbojet engine jet engine jet engine junkyard	1	2	1	0	3	1	4	6	5	8	8	1	1	11	6	4	14	16	8
cepnow construction electrical products cep independent family american manufacturers construction-grade electrical products	engineering	cepnow construction electrical products cep independent family american manufacturers construction grade electrical products	1	0	1	0	3	0	4	6	5	4	8	1	1	11	5	4	14	16	2
federalsignal indust federal signal corporation industrial safety security federal signal electrical products industrial safety security audible signals visual signals voice communication life safety	engineering	federalsignal indust federal signal corporation industrial safety security federal signal electrical products industrial safety security audible signals visual signals voice communication life safety	1	0	1	0	3	0	4	6	5	4	8	1	1	11	5	4	15	1	2
autoweb used models search autoweb model search autoweb model lincoln town car autoweb lotus elise autoweb lotus esprit autoweb	engineering	autoweb models search autoweb model search autoweb model lincoln town car autoweb lotus elise autoweb lotus esprit autoweb	1	2	1	0	3	1	4	6	6	0	2	1	2	7	6	9	3	17	9
hotimportnights hot import nights car car models music lifestyle events hot import nights premier import car featuring import tuners import tuner girls import cars import car models music entertainment	engineering	hotimportnights hot import nights car car models music lifestyle events hot import nights premier import car featuring import tuners import tuner girls import cars import car models music entertainment	1	1	1	0	3	1	1	6	8	0	2	1	9	7	2	9	3	17	9
importtuner tuner cars import models import tuner cars import tuner magazine import tuner monthly magazine featuring tuner car import scene lifestyles import tuner cars import models	engineering	importtuner tuner cars import models import tuner cars import tuner magazine import tuner monthly magazine featuring tuner car import scene lifestyles import tuner cars import models	1	1	1	0	3	1	1	6	8	0	2	1	9	7	2	9	3	17	9
scaleautomag scale auto building collecting model cars readers kit building techniques collector market insight kit product releases	engineering	scaleautomag scale auto building collecting model cars readers kit building techniques collector market insight kit product releases	1	2	1	0	3	1	4	6	5	8	8	1	1	11	6	4	14	16	8
wikipedia wiki model car model car wikipedia encyclopedia model car miniature representation scale model automobile powered vehicle reproducing shapes	engineering	wikipedia wiki model car model car wikipedia encyclopedia model car miniature representation scale model automobile powered vehicle reproducing shapes	1	2	1	0	3	1	4	6	5	0	8	1	2	7	6	9	3	17	9
motormint motormint com diecast model car collectibles won die cast car truck models classic diecast cars diecast models model kits	engineering	motormint motormint diecast model car collectibles won die cast car truck models classic diecast cars diecast models model kits	1	2	1	0	3	1	1	6	6	0	2	1	2	7	6	9	3	17	9
dmi chez alice models dmi car models download car models car models subaru tribeca carrera cadillac cts cars mitsubishi car forum car gallery	engineering	dmi chez alice models dmi car models download car models car models subaru tribeca carrera cadillac cts cars mitsubishi car forum car gallery	1	2	1	0	3	1	1	6	6	0	2	1	2	7	6	9	3	17	9
policecarmodels diecast police cars kits decals accessories gearbox premier edition burbank ford crown vic police car signature models chrysler imperial police car	engineering	policecarmodels diecast police cars kits decals accessories gearbox premier edition burbank ford crown vic police car signature models chrysler imperial police car	1	2	1	0	3	1	1	6	6	0	8	1	1	7	6	9	3	16	9
iloveindia cars car models index car models india car models india car models elsewhere india	engineering	iloveindia cars car models car models india car models india car models india	1	2	1	0	3	1	1	6	6	0	8	1	2	7	6	9	3	17	9
auto howstuffworks car models channel howstuffworks car models channel car models true classics beloved automobiles howstuffworks	engineering	auto howstuffworks car models channel howstuffworks car models channel car models true classics beloved automobiles howstuffworks	1	2	1	0	3	1	4	6	5	0	8	1	2	7	6	9	3	16	8
csmonitor woeu german community models car -free living csmonitor com vauban development practice ideas dismissed eco-fantasy	engineering	csmonitor woeu german community models car free living csmonitor vauban development practice ideas dismissed eco fantasy	1	2	1	1	2	3	3	5	3	0	2	9	12	7	2	8	16	17	9
cars yahoo new road car models model turnaround car design daimler super daimler super dennis	engineering	cars yahoo road car models model turnaround car design daimler super daimler super dennis	1	2	1	0	3	1	1	6	5	0	8	1	2	7	6	9	3	16	9
diecast diecast cars diecast models die cast collectibles diecast zone insider news comprehensive car lists reviews online forums faqs features collectors precision scale model cars	engineering	diecast diecast cars diecast models die cast collectibles diecast zone insider news comprehensive car lists reviews online forums faqs features collectors precision scale model cars	1	2	1	0	3	1	1	6	6	0	2	1	2	7	6	9	3	17	9
rars sourceforge screenshot car car car models screenshots robots rars model default car model choosen colors car	engineering	rars sourceforge screenshot car car car models screenshots robots rars model default car model choosen colors car	1	2	1	0	3	1	1	6	6	0	2	1	9	7	6	9	3	17	9
benlokkers ben lokkers car models ben lokkers car models bergen zoom netherlands classic modern racing classics rally classics formules	engineering	benlokkers ben lokkers car models ben lokkers car models bergen zoom netherlands classic modern racing classics rally classics formules	1	2	1	0	3	1	4	6	6	0	2	1	9	7	6	9	3	17	9
themodelcarmuseum national model car builders museum museum dedicated preserving history model car	engineering	themodelcarmuseum national model car builders museum museum dedicated preserving history model car	1	2	1	0	3	1	1	6	6	0	2	1	2	7	6	9	3	17	9
modelcarkits hobby heaven plastic model car kits collectables plastic model car kits collectables secure online catalog sales	engineering	modelcarkits hobby heaven plastic model car kits collectables plastic model car kits collectables secure online catalog sales	1	2	1	0	3	1	1	6	6	0	8	1	2	7	6	9	3	17	9
theaircar models mdi air car world´s cleanest car technical data mdi car models family van taxi pick-up mini cat resolution images videos mpeg	engineering	theaircar models mdi air car cleanest car technical data mdi car models family van taxi pick mini cat resolution images videos mpeg	1	2	1	0	3	1	4	6	6	0	8	1	9	7	6	9	3	17	9
ewacars diecast model cars ewa car books car videos selection model cars motor books car videos car magazines	engineering	ewacars diecast model cars ewa car books car videos selection model cars motor books car videos car magazines	1	2	1	0	3	1	1	6	6	0	2	1	9	7	6	9	3	17	9
carandmodel car model import cars import models event coverage car model online coverage automotive motorsports model expos sport compact import events north america	engineering	carandmodel car model import cars import models event coverage car model online coverage automotive motorsports model expos sport compact import events north america	1	1	1	0	3	1	1	6	5	0	2	1	2	7	6	9	3	17	9
wikipedia wiki car wheels gravel road car wheels gravel road wikipedia encyclopedia car wheels gravel road won grammy contemporary folk album willams album gold voted album	engineering	wikipedia wiki car wheels gravel road car wheels gravel road wikipedia encyclopedia car wheels gravel road won grammy contemporary folk album willams album gold voted album	1	2	1	0	3	1	1	6	6	0	2	1	9	7	12	9	3	17	9
motors listings ebay car wheels tyres trims qqloglz qqsacatz qqsargnzsalicqqsocmdzlistingitemlist ebay alloy wheels tyres wheel items prices car wheels tyres trims cars vehicles categories ----------------------------------- antiques art baby books comics magazines	engineering	motors listings ebay car wheels tyres trims qqloglz qqsacatz qqsargnzsalicqqsocmdzlistingitemlist ebay alloy wheels tyres wheel items prices car wheels tyres trims cars vehicles categories antiques art baby books comics magazines	1	2	1	0	3	1	1	6	6	0	2	1	9	7	12	9	3	16	9
customwheelsmarket custom wheels car rims-chrome wheels -replica wheels -custom wheels custom wheels rims sale buy custom wheels replica wheels online car rims chrome wheels custom rims tires	engineering	customwheelsmarket custom wheels car rims chrome wheels replica wheels custom wheels custom wheels rims sale buy custom wheels replica wheels online car rims chrome wheels custom rims tires	1	2	1	0	3	1	3	3	6	0	2	9	9	7	12	9	3	16	9
slickcar custom wheels custom car wheels custom wheels online slickcar com features line custom wheels car truck suv	engineering	slickcar custom wheels custom car wheels custom wheels online slickcar features custom wheels car truck suv	1	2	1	0	3	1	3	3	6	0	2	9	9	7	12	9	3	16	9
primidi smart car wheels scientists university portsmouth developed artificial intelligence system build world car wheel	engineering	primidi smart car wheels scientists university portsmouth developed artificial intelligence system build car wheel	1	2	1	0	3	1	3	6	6	0	2	1	9	7	6	9	3	16	9
daytonwirewheels dayton wire wheels cars street rods suvs trucks dayton wire wheels established dayton ohio premier designer manufacturer car rims wire wheels	engineering	daytonwirewheels dayton wire wheels cars street rods suvs trucks dayton wire wheels established dayton ohio premier designer manufacturer car rims wire wheels	1	2	1	0	3	1	4	6	6	0	2	1	9	7	6	9	3	16	9
hubcaps wheels alloy wheels car wheels truck tires wheels tips advice information alloy wheels truck car tires wheels car wheels alloy truck tires	engineering	hubcaps wheels alloy wheels car wheels truck tires wheels tips advice alloy wheels truck car tires wheels car wheels alloy truck tires	1	2	1	0	3	1	3	3	6	0	2	9	9	7	12	9	3	16	9
carpartswholesale cpw wheels auto wheels car wheels car wholesale wheels integral vehicle propel vehicle sharp stylish	engineering	carpartswholesale cpw wheels auto wheels car wheels car wholesale wheels integral vehicle propel vehicle sharp stylish	1	2	1	0	3	1	4	6	6	0	2	1	9	7	6	9	3	16	9
weldracing weld racing wheels forged truck suv car motorcycle racing world toughest forged wheels off-road enthusiast modern muscle car weld racing wheels	engineering	weldracing weld racing wheels forged truck suv car motorcycle racing toughest forged wheels road enthusiast modern muscle car weld racing wheels	1	2	1	0	3	1	4	6	6	0	2	1	9	7	6	9	3	16	9
wheelguyz custom wheels custom rims custom wheels rims car rims custom custom wheels custom rims custom wheels rims car rims custom auto wheels custom auto rims auto rims rims wheels tenzo wheels nankang tires	engineering	wheelguyz custom wheels custom rims custom wheels rims car rims custom custom wheels custom rims custom wheels rims car rims custom auto wheels custom auto rims auto rims rims wheels tenzo wheels nankang tires	1	2	1	0	3	1	3	3	6	0	2	9	9	7	12	9	3	16	9
amazon hot wheels molded car case amazon com hot wheels molded car colors toys amazon com hot wheels molded car colors toys games	engineering	amazon hot wheels molded car amazon hot wheels molded car colors toys amazon hot wheels molded car colors toys games	1	2	1	0	3	1	1	6	6	0	2	1	9	7	6	9	3	17	9
wheels blogs nytimes indias car indias car wheels autos york blog agreed wheels bolted saying	engineering	wheels blogs nytimes indias car indias car wheels autos york blog agreed wheels bolted	1	2	1	0	3	1	3	3	6	0	2	1	9	7	6	9	3	16	9
carrim cheap rims cheapest rims discount car rims wheels carrim net website helps cheapest rims wheels online	engineering	carrim cheap rims cheapest rims discount car rims wheels carrim net website helps cheapest rims wheels online	1	2	1	0	3	1	3	3	6	0	2	9	9	7	12	9	3	16	9
riograndewheels rio grande wheels car club classic car club vehicles newsletter photos classifieds paso texas	engineering	riograndewheels rio grande wheels car club classic car club vehicles newsletter photos classifieds paso texas	1	1	1	0	3	1	1	3	6	0	2	1	9	7	11	9	3	17	9
idcow diecast car models autoart jada toys hot wheels maisto diecast car models autoart jada toys hot wheels maisto	engineering	idcow diecast car models autoart jada toys hot wheels maisto diecast car models autoart jada toys hot wheels maisto	1	2	1	0	3	1	1	6	6	0	2	1	9	7	6	9	3	17	9
scalecars model car scale car model diecast scalecars com© scalecars com model cars collectors scale diecast model car	engineering	scalecars model car scale car model diecast scalecars scalecars model cars collectors scale diecast model car	1	2	1	0	3	1	1	6	6	0	2	1	2	7	6	9	3	17	9
wikipedia wiki open wheel car wheel car wikipedia encyclopedia open- wheel car cars wheels car body open- wheel cars street cars stock cars touring cars	engineering	wikipedia wiki wheel car wheel car wikipedia encyclopedia wheel car cars wheels car body wheel cars street cars stock cars touring cars	1	2	1	0	3	1	4	6	6	0	2	1	9	7	6	9	3	16	9
importtuner models hot import models sexy import car girls import tuner magazine import tuner interviews cover models personal hottest import models sexy import car girls	engineering	importtuner models hot import models sexy import car girls import tuner magazine import tuner interviews cover models personal hottest import models sexy import car girls	1	1	1	0	3	1	1	6	8	0	2	1	9	7	2	9	3	17	9
dmi chez alice models dmi car models model opinion appreciated links links models commercial models games models car forum car gallery	engineering	dmi chez alice models dmi car models model opinion appreciated links links models commercial models games models car forum car gallery	1	2	1	0	3	1	1	6	6	0	2	1	2	7	6	9	3	17	9
ericksonelectric erickson electical equipment company erickson electrical equipment company bonnie lane elk grove village phone fax	engineering	ericksonelectric erickson electical equipment company erickson electrical equipment company bonnie lane elk grove village phone fax	1	0	1	0	3	0	4	6	5	4	8	2	1	14	5	4	14	1	2
hse gov pubns indg indg maintaining portable electrical equipment offices ‘are risks portable electrical equipment offices maintaining portable transportable electrical equipment	engineering	hse gov pubns indg indg maintaining portable electrical equipment offices risks portable electrical equipment offices maintaining portable transportable electrical equipment	1	0	1	0	1	0	4	6	2	4	8	2	1	14	5	4	15	1	2
alibaba showroom electrical equipment electrical equipment manufacturers electrical equipment manufacturers exporters suppliers traders companies factories alibaba com world online base suppliers	engineering	alibaba showroom electrical equipment electrical equipment manufacturers electrical equipment manufacturers exporters suppliers traders companies factories alibaba online base suppliers	1	0	1	0	3	1	4	6	5	8	8	1	1	11	6	4	14	1	2
steadypower steadypower com coffman electrical equipment company helped coffman electrical equipment supplier federal government	engineering	steadypower steadypower coffman electrical equipment company helped coffman electrical equipment supplier federal government	1	0	1	0	3	0	4	6	5	4	8	1	1	14	5	4	14	1	2
dti gov innovation sustainability weee directive waste electrical electronic equipment weee dti producers responsible financing collection treatment recovery waste electrical equipment	engineering	dti gov innovation sustainability weee directive waste electrical electronic equipment weee dti producers responsible financing collection treatment recovery waste electrical equipment	1	0	1	0	3	0	4	6	5	4	8	2	1	11	5	4	15	1	2
online onetcenter link summary summary report repair equipment machines defective components worn gaskets seals watertight electrical equipment	engineering	online onetcenter link summary summary report repair equipment machines defective components worn gaskets seals watertight electrical equipment	1	0	1	0	3	1	4	6	5	8	8	1	1	11	5	4	14	1	2
physorg news electrical fields equipment materials physorg news electrical fields equipment materials infection risk	engineering	physorg news electrical fields equipment materials physorg news electrical fields equipment materials infection risk	1	0	1	0	3	0	4	6	5	4	8	1	1	11	5	4	15	1	2
amazon mechanical electrical equipment buildings amazon com mechanical electrical equipment buildings amazon com mechanical electrical equipment buildings edition books benjamin stein reynolds walter grondzik alison kwok	engineering	amazon mechanical electrical equipment buildings amazon mechanical electrical equipment buildings amazon mechanical electrical equipment buildings edition books benjamin stein reynolds walter grondzik alison kwok	1	0	1	0	3	0	4	6	5	2	8	2	9	11	6	4	14	1	5
ezmeter watthour meters apartments marinas submetering watt-hour meters switches marinas parks products downloads	engineering	ezmeter watthour meters apartments marinas submetering watt hour meters switches marinas parks products downloads	0	0	1	2	3	1	4	4	5	4	10	2	11	10	5	4	13	1	2
opsi gov uksi electrical equipment safety regulations authoritative version queen printer copy published stationery office electrical equipment safety regulations	engineering	opsi gov uksi electrical equipment safety regulations authoritative version queen printer copy published stationery office electrical equipment safety regulations	1	0	1	0	1	0	4	6	5	4	8	1	1	14	5	4	15	1	2
hse gov pubns indg indg maintaining portable electrical equipment hotels electrical equipment hotel maintain ‘are risks portable electrical equipment	engineering	hse gov pubns indg indg maintaining portable electrical equipment hotels electrical equipment hotel maintain risks portable electrical equipment	1	0	1	0	1	0	4	6	2	4	8	2	1	14	5	4	15	1	2
workcover nsw gov rdonlyres bee electrical equipment risk assessment checklist electrical equipment risk assessment guidelines help comply legislative requirements clause occupational health safety regulation ohs	engineering	workcover nsw gov rdonlyres bee electrical equipment risk assessment checklist electrical equipment risk assessment guidelines comply legislative requirements clause occupational health safety regulation ohs	1	0	1	0	3	0	4	6	5	4	8	2	1	14	5	4	15	1	2
europa environment waste weee index environment waste electrical electronic equipment directives restriction hazardous substances electrical electronic equipment waste	engineering	europa environment waste weee environment waste electrical electronic equipment directives restriction hazardous substances electrical electronic equipment waste	1	0	1	0	3	0	4	6	5	4	8	2	1	11	5	4	15	1	2
bls gov oco ocos assemblers fabricators electrical electronic equipment assemblers build products electric motors batteries computers electronic control devices sensing	engineering	bls gov oco ocos assemblers fabricators electrical electronic equipment assemblers build products electric motors batteries computers electronic control devices sensing	1	0	1	0	3	0	4	6	5	4	8	1	1	11	5	4	14	1	2
facilities yale edu work volume approvals guide electrical equipment text reflects additions edition guide	engineering	facilities yale volume approvals guide electrical equipment text reflects additions edition guide	1	0	1	2	3	1	4	6	5	8	8	2	1	14	6	4	15	9	2
eeco electrical equipment company electrical equipment company business augusta location marvin griffin road company augusta	engineering	eeco electrical equipment company electrical equipment company business augusta location marvin griffin road company augusta	1	0	1	0	3	0	4	6	5	4	8	1	1	11	5	4	14	1	2
motortrend new cars compact cars compact cars compact car models motor trend motor trend car buyer guide research compact cars rebates pricing recalls compact	engineering	motortrend cars compact cars compact cars compact car models motor trend motor trend car buyer guide compact cars rebates pricing recalls compact	1	2	1	0	3	1	4	6	5	0	8	1	2	7	6	9	3	17	9
rowelectrical row electrical equipment home page buying selling reconditioned industrial equipment	engineering	rowelectrical row electrical equipment buying selling reconditioned industrial equipment	1	0	1	0	3	0	4	6	5	4	8	1	1	11	5	4	14	1	2
aps anl gov safety and training electrical safety index user electrical equipment inspections compliance nec osha doe regulations electronic electrical equipment aps inspected	engineering	aps anl gov safety training electrical safety user electrical equipment inspections compliance nec osha doe regulations electronic electrical equipment aps inspected	1	0	1	0	3	0	4	6	5	4	8	1	1	11	5	4	14	1	2
autos yahoo isuzu isuzu cars isuzu car models yahoo autos yahoo autos isuzu cars research isuzu car models isuzu ascender compare isuzu vehicles buy isuzus sale	engineering	autos yahoo isuzu isuzu cars isuzu car models yahoo autos yahoo autos isuzu cars isuzu car models isuzu ascender compare isuzu vehicles buy isuzus sale	1	2	1	0	3	1	4	6	5	0	8	1	2	7	6	9	3	16	9
autos yahoo newcars latest models models yahoo autos upcoming car models sneak peek automotive industry lined hit showroom floor	engineering	autos yahoo newcars models models yahoo autos upcoming car models sneak peek automotive industry lined hit showroom floor	1	2	1	0	3	1	4	6	5	0	8	1	2	7	6	9	3	16	9
showrods dave rod rally vintage car models dedicated collection vintage model rods scale model showrods	engineering	showrods dave rod rally vintage car models dedicated collection vintage model rods scale model showrods	1	2	1	0	3	1	1	6	6	0	2	1	2	7	6	9	3	17	9
lotpro new car prices quotes models rebates buying incentives compare car prices quotes car models rebates car buying incentives search models style coupes suv trucks sedans wagons	engineering	lotpro car prices quotes models rebates buying incentives compare car prices quotes car models rebates car buying incentives search models style coupes suv trucks sedans wagons	1	2	1	0	3	1	4	6	6	0	2	1	2	7	6	9	3	16	9
wikipedia wiki electrical equipment electrical equipment wikipedia encyclopedia piece electrical equipment machine powered electricity enclosure electrical components	engineering	wikipedia wiki electrical equipment electrical equipment wikipedia encyclopedia piece electrical equipment machine powered electricity enclosure electrical components	1	0	1	0	3	0	4	6	5	4	8	1	1	11	5	4	14	1	2
foxelectricsupply wholesale electrical electrical equipment electrical supplier wholesalers contractors consumers company specialized equipment electrical	engineering	foxelectricsupply wholesale electrical electrical equipment electrical supplier wholesalers contractors consumers company specialized equipment electrical	1	0	1	0	3	0	4	6	5	4	8	1	1	11	5	4	14	1	2
rosenelectric rosen electrical equipment surplus electrical equipment commercial electrical engineers electrical technicians source surplus electrical equipment	engineering	rosenelectric rosen electrical equipment surplus electrical equipment commercial electrical engineers electrical technicians source surplus electrical equipment	1	0	1	0	3	0	4	6	5	4	8	1	1	11	5	4	14	1	2
news thomasnet news electrical equipment systems reliable electrical equipment systems news stories source electrical equipment systems news stories database reliable industrial news	engineering	news thomasnet news electrical equipment systems reliable electrical equipment systems news stories source electrical equipment systems news stories database reliable industrial news	1	0	1	0	3	0	4	6	5	4	8	1	1	11	5	4	15	1	2
bls gov oco ocos electrical electronics installers repairers knowledge electrical equipment electronics employment applicants vocational schools community	engineering	bls gov oco ocos electrical electronics installers repairers knowledge electrical equipment electronics employment applicants vocational schools community	1	0	1	0	3	0	4	6	5	4	8	1	1	11	5	4	14	1	2
nema stds water damaged nema evaluating water-damaged electrical equipment evaluating water-damaged electrical equipment	engineering	nema stds water damaged nema evaluating water damaged electrical equipment evaluating water damaged electrical equipment	1	0	1	0	3	0	4	6	5	4	8	1	1	11	5	4	14	1	2
eera electrical equipment representatives association representatives share practices discuss matters pertinent businesses electrical industry serve	engineering	eera electrical equipment representatives association representatives share practices matters pertinent businesses electrical industry serve	1	0	1	0	1	0	4	6	2	4	6	10	1	14	5	4	15	1	2
europa enterprise electr equipment index enterprise industry electrical equipment voltage directive lvd lays requirements covering health safety risks electrical equipment operating	engineering	europa enterprise electr equipment enterprise industry electrical equipment voltage directive lvd lays requirements covering health safety risks electrical equipment operating	1	0	1	0	3	0	4	6	5	4	8	2	1	14	5	4	15	1	2
amazon mechanical electrical equipment buildings amazon com mechanical electrical equipment buildings amazon com mechanical electrical equipment buildings edition books ben stein reynolds ben stein reynolds	engineering	amazon mechanical electrical equipment buildings amazon mechanical electrical equipment buildings amazon mechanical electrical equipment buildings edition books ben stein reynolds ben stein reynolds	1	0	1	0	3	0	4	6	5	2	8	2	9	11	6	4	14	1	5
gzmeihao guangzhou electrical equipment factory electrical maufacturer exporter electrical appliances air cleaner air freshener air conditioner standing air curtain electric heater extra	engineering	gzmeihao guangzhou electrical equipment factory electrical maufacturer exporter electrical appliances air cleaner air freshener air conditioner standing air curtain electric heater extra	1	0	1	0	3	0	4	6	5	8	8	1	1	11	5	4	14	1	2
seekingalpha article electrical equipment industry picks alpha wall street transcript interviewed stephen tusa vice president senior analyst multi-industry electrical equipment equity	engineering	seekingalpha article electrical equipment industry picks alpha wall street transcript interviewed stephen tusa vice president senior analyst multi industry electrical equipment equity	1	0	1	0	1	0	4	6	5	4	8	1	1	14	5	4	15	1	2
eastcoastmotor east coast electrical equipment home buy sell repair electric motors transformers starters	engineering	eastcoastmotor east coast electrical equipment buy sell repair electric motors transformers starters	1	0	1	0	3	1	4	6	5	8	8	1	1	11	5	4	14	1	2
wheelsrims industry leader custom wheels car rims truck rims shop wheels rims hubcaps wheel covers euro lights wheel -related products models suppliers oem aftermarket	engineering	wheelsrims industry leader custom wheels car rims truck rims shop wheels rims hubcaps wheel covers euro lights wheel products models suppliers oem aftermarket	1	2	1	0	3	1	3	3	6	0	2	9	9	7	12	9	3	16	9
fueleconomy gov feg findacar car estimates gas mileage greenhouse gas emissions safety ratings air pollution ratings model cars trucks	engineering	fueleconomy gov feg findacar car estimates gas mileage greenhouse gas emissions safety ratings air pollution ratings model cars trucks	1	2	1	0	3	0	4	6	5	8	8	1	1	11	6	4	14	16	8
tireandwheeldeals tire wheel deals truck suv car wheels tires tireandwheeldeals com deal tire wheel package featuring custom chrome rims wheels inch inch kmc wheels car	engineering	tireandwheeldeals tire wheel deals truck suv car wheels tires tireandwheeldeals deal tire wheel package featuring custom chrome rims wheels inch inch kmc wheels car	1	2	1	0	3	1	3	3	6	0	2	9	9	7	12	9	3	16	9
lmphotonics electrical calculations induction motor control software consultancy services electrical electronics industries focus motor control incorporating educational	engineering	lmphotonics electrical calculations induction motor control software consultancy services electrical electronics industries focus motor control incorporating educational	1	0	1	0	3	0	4	6	5	4	8	1	1	11	5	4	14	1	2
engineeringtoolbox electrical systems electrical electrical motor calculator online electrical motor calculator calculate amps kva indicating locked rotor code letters electrical motors	engineering	engineeringtoolbox electrical systems electrical electrical motor calculator online electrical motor calculator calculate amps kva indicating locked rotor code letters electrical motors	1	0	1	0	3	0	4	6	5	8	8	1	1	11	5	4	14	1	2
epanorama links motorcontrol epanorama net links electrical motors operate principle magnetic fields electric motor drive systems consume	engineering	epanorama links motorcontrol epanorama net links electrical motors operate principle magnetic fields electric motor drive systems consume	1	0	1	0	3	0	4	6	5	8	8	1	1	11	5	4	14	1	2
made china electrical electronics catalog electric motor china electric motor electric motor catalog china electric motor china electric motor catalog electric motor manufacturer directory trade platform china electric motor manufacturers global electric motor	engineering	china electrical electronics catalog electric motor china electric motor electric motor catalog china electric motor china electric motor catalog electric motor manufacturer directory trade platform china electric motor manufacturers global electric motor	1	0	1	0	3	0	4	6	5	8	8	1	1	11	5	4	14	1	8
goldenmotor hub motor brushless motor electric bike power wheelchair chinese manufacturer electric bikes bike conversion kits	engineering	goldenmotor hub motor brushless motor electric bike power wheelchair chinese manufacturer electric bikes bike conversion kits	1	2	1	0	3	0	4	6	5	8	8	1	1	11	6	4	14	16	8
interfacebus motors electrical motor manufacturers motor motor servo resolver index engineering links electronic motor components electrical electronic motor manufacturers	engineering	interfacebus motors electrical motor manufacturers motor motor servo resolver engineering links electronic motor components electrical electronic motor manufacturers	1	0	1	0	3	0	4	6	5	8	8	1	1	11	5	4	14	1	2
careerbuilder jobseeker jobs jobdetails job did hsshnkr jobs electrical motor design engineer jobs kansas thank electrical motor design engineer application process email address	engineering	careerbuilder jobseeker jobs jobdetails job hsshnkr jobs electrical motor design engineer jobs kansas electrical motor design engineer application process email address	1	0	1	0	3	0	4	6	5	4	8	1	1	11	5	4	14	1	2
alibaba showroom electrical motor electrical motor manufacturers electrical motor manufacturers exporters suppliers traders companies factories alibaba com world online base suppliers importers	engineering	alibaba showroom electrical motor electrical motor manufacturers electrical motor manufacturers exporters suppliers traders companies factories alibaba online base suppliers importers	1	0	1	0	3	1	4	6	5	8	8	1	1	11	6	4	14	1	2
eng tips threadminder pid electric motors motor controls engineering forum eng-tips description electric motors motor controls engineering technical forum mutual help system engineering professionals	engineering	eng tips threadminder pid electric motors motor controls engineering forum eng tips description electric motors motor controls engineering technical forum mutual system engineering professionals	1	0	1	0	3	0	4	6	5	8	8	1	1	11	6	4	14	1	8
bakerinst baker instrument company leader electrical test equipment baker instrument company electrical motor test equipment maintenance professionals rewinding providers industry	engineering	bakerinst baker instrument company leader electrical test equipment baker instrument company electrical motor test equipment maintenance professionals rewinding providers industry	1	0	1	0	3	0	4	6	5	4	8	1	1	11	5	4	14	1	2
solvayadvancedpolymers markets automotive automotiveelectricalmotorparts electricalmotorparts electric motor plates brush holders armature links electrical motor applications	engineering	solvayadvancedpolymers markets automotive automotiveelectricalmotorparts electricalmotorparts electric motor plates brush holders armature links electrical motor applications	1	0	1	0	3	0	4	6	5	8	8	1	1	11	5	4	14	1	2
familycar transmission automatic transmissions course planetary gear system automatic transmissions gears combinations manual transmission gears slide shafts	engineering	familycar transmission automatic transmissions planetary gear system automatic transmissions gears combinations manual transmission gears slide shafts	1	2	1	0	3	1	4	6	5	8	8	3	2	2	6	16	14	3	19
wikipedia wiki automatic transmission automatic transmission wikipedia encyclopedia automatic transmission automobile gearbox gear ratios automatically vehicle freeing driver	engineering	wikipedia wiki automatic transmission automatic transmission wikipedia encyclopedia automatic transmission automobile gearbox gear ratios automatically vehicle freeing driver	1	2	1	0	3	1	4	6	5	8	8	3	2	2	6	16	14	3	19
auto howstuffworks automatic transmission howstuffworks automatic transmissions automatic transmission pain gear shifting hands automatic transmission manual	engineering	auto howstuffworks automatic transmission howstuffworks automatic transmissions automatic transmission pain gear shifting hands automatic transmission manual	1	2	1	0	3	1	4	6	5	8	8	3	2	2	6	16	14	3	19
auto howstuffworks automatic transmission howstuffworks compound planetary gearset automatic transmission gear housing gears transmission ring gear planet carrier sun gears	engineering	auto howstuffworks automatic transmission howstuffworks compound planetary gearset automatic transmission gear housing gears transmission ring gear planet carrier sun gears	1	2	1	0	3	1	4	6	5	8	8	3	2	2	6	16	14	3	19
sci toys scitoys scitoys electro electro chapter electromagnetism father taught electric motor sometime description	engineering	sci toys scitoys scitoys electro electro chapter electromagnetism father taught electric motor description	1	0	1	0	3	1	4	6	5	8	8	1	1	11	6	4	3	1	8
mouthshut product reviews automatic gear manual gear reviews automatic gear manual gear mouthshut com write reviews automatic gear manual gear product reviews ratings feature comparisons photos cars suvs millions products	engineering	mouthshut product reviews automatic gear manual gear reviews automatic gear manual gear mouthshut write reviews automatic gear manual gear product reviews ratings feature comparisons photos cars suvs millions products	1	2	1	0	3	1	4	6	5	8	8	3	2	2	6	16	14	3	19
amazon electric motor handbook wayne beaty amazon com electric motor handbook books wayne beaty amazon com electric motor handbook books wayne beaty kirtley wayne beaty kirtley	engineering	amazon electric motor handbook wayne beaty amazon electric motor handbook books wayne beaty amazon electric motor handbook books wayne beaty kirtley wayne beaty kirtley	1	0	1	0	3	0	4	6	5	8	8	1	1	11	6	4	14	1	8
ieee virtual museum collection tech lid ieeevm motor electric motor converts electricity mechanical motion electric motor grew discoveries electric	engineering	ieee virtual museum collection tech lid ieeevm motor electric motor converts electricity mechanical motion electric motor grew discoveries electric	1	0	1	0	3	0	4	6	5	8	8	1	1	11	5	4	14	1	8
wikipedia wiki electric motor electric motor wikipedia encyclopedia electric motor converts electrical energy mechanical energy reverse process converting mechanical energy electrical energy	engineering	wikipedia wiki electric motor electric motor wikipedia encyclopedia electric motor converts electrical energy mechanical energy reverse process converting mechanical energy electrical energy	1	0	1	0	3	0	4	6	5	8	8	1	1	11	5	4	14	1	8
howstuffworks motor howstuffworks electric motors surprised electric motors car kitchen bathroom	engineering	howstuffworks motor howstuffworks electric motors surprised electric motors car kitchen bathroom	1	0	1	0	3	0	4	6	5	8	8	1	1	11	6	4	14	16	8
home hiwaay palmer motor beakman electric motor diagrams build electric motor minimal links extra science experiments children	engineering	hiwaay palmer motor beakman electric motor diagrams build electric motor minimal links extra science experiments children	1	0	1	0	3	0	4	6	5	8	8	1	1	11	5	4	14	1	2
usmotors electrical motors electrical motors division emerson electric line industrial motors gears	engineering	usmotors electrical motors electrical motors division emerson electric industrial motors gears	1	0	1	0	3	0	4	6	5	4	8	1	1	11	5	4	14	1	2
hyperphysics phy astr gsu edu hbase magnetic elemot electric motors electric motors rotating coils wire driven magnetic force exerted magnetic field electric	engineering	hyperphysics phy astr gsu hbase magnetic elemot electric motors electric motors rotating coils wire driven magnetic force exerted magnetic field electric	1	0	1	0	3	0	4	6	5	8	8	1	1	11	5	4	14	1	2
aosmithmotors electrical products company build electric motors electric motor job	engineering	aosmithmotors electrical products company build electric motors electric motor job	1	0	1	0	3	0	4	6	5	4	8	1	1	11	5	4	14	1	2
sciencejoywagon physicszone lesson otherpub wfendt electricmotor electrical motor java applet simulation electrical motor	engineering	sciencejoywagon physicszone lesson otherpub wfendt electricmotor electrical motor java applet simulation electrical motor	1	0	1	0	3	0	4	6	5	4	8	1	1	11	5	4	14	1	8
wegelectric weg electric motors producer electric motors company news catalog contact information	engineering	wegelectric weg electric motors producer electric motors company news catalog contact	1	0	1	0	3	0	4	6	5	4	8	1	1	11	5	4	14	1	2
exploratorium edu snacks stripped down motor exploratorium science snacks stripped motor motor sliding electrical contact coil electric motors complicated commutators	engineering	exploratorium snacks stripped motor exploratorium science snacks stripped motor motor sliding electrical contact coil electric motors complicated commutators	1	0	1	0	3	1	4	6	5	8	8	1	1	11	5	4	14	1	2
evilmadscientist article homopolarmotor evil mad scientist laboratories simplest electric motor running excess rpm stingy scholar blog archive »the simplest electric motor	engineering	evilmadscientist article homopolarmotor evil mad scientist laboratories simplest electric motor running excess rpm stingy scholar blog archive simplest electric motor	1	0	1	0	3	0	4	6	5	8	8	1	1	11	6	4	14	1	8
reliance reliance motors drives home leading supplier industrial automation solutions motors drives controls	engineering	reliance reliance motors drives leading supplier industrial automation solutions motors drives controls	1	0	1	0	3	0	4	6	5	4	8	1	1	11	5	4	14	1	2
wikipedia wiki brushless electric motor brushless electric motor wikipedia encyclopedia brushless motor bldc synchronous electric motor modeling perspective motor	engineering	wikipedia wiki brushless electric motor brushless electric motor wikipedia encyclopedia brushless motor bldc synchronous electric motor modeling perspective motor	1	0	1	0	3	0	4	6	5	8	8	1	1	11	6	4	14	16	8
walter fendt electricmotor electrical motor java applet simulation electrical motor	engineering	walter fendt electricmotor electrical motor java applet simulation electrical motor	1	0	1	0	3	0	4	6	5	4	8	1	1	11	5	4	14	1	8
alibaba buyeroffers electrical motor electrical motor importers contact electrical motor importers buyers countries regions alibaba com world online import export	engineering	alibaba buyeroffers electrical motor electrical motor importers contact electrical motor importers buyers countries regions alibaba online import export	1	0	1	0	3	1	4	6	5	8	8	1	1	11	6	4	14	1	2
emscomn electric electrical equipment electrical equipment emsco electric motor supplier reconditioned electrical usa	engineering	emscomn electric electrical equipment electrical equipment emsco electric motor supplier reconditioned electrical usa	1	0	1	0	3	0	4	6	5	4	8	1	1	11	5	4	14	1	2
web alfredstate edu ciat tutorials rotatingcarwheels rotating wheels car handout rotate wheels car pace car	engineering	web alfredstate ciat tutorials rotatingcarwheels rotating wheels car handout rotate wheels car pace car	1	2	1	0	3	1	3	6	6	0	2	1	9	7	12	9	3	17	9
mouthshut review automatic gear manual gear review automatic gear manual gear jrohit mouthshut com review automatic gear manual gear jrohit user written consumer reviews ratings feature comparisons photos cars suvs millions	engineering	mouthshut review automatic gear manual gear review automatic gear manual gear jrohit mouthshut review automatic gear manual gear jrohit user written consumer reviews ratings feature comparisons photos cars suvs millions	1	2	1	0	3	1	4	6	5	8	8	3	2	2	6	16	14	3	19
marathonelectric marathon electric inc motors generators marathon electric company web manufacturer electric motors generators	engineering	marathonelectric marathon electric motors generators marathon electric company web manufacturer electric motors generators	1	0	1	0	3	0	4	6	5	4	8	1	1	11	5	4	14	1	2
innerauto automotive definitions automatic gear shifting automatic gear shifting inner auto automatic transmissions pair gear epicyclic planetary gears ring gear	engineering	innerauto automotive definitions automatic gear shifting automatic gear shifting auto automatic transmissions pair gear epicyclic planetary gears ring gear	1	2	1	0	3	1	4	6	5	8	8	3	2	2	6	16	14	3	19
auto recalls justia content jaguar auto recalls jaguar power train automatic transmission component power train automatic transmission gear indication prndl potential units affected summary	engineering	auto recalls justia content jaguar auto recalls jaguar power train automatic transmission component power train automatic transmission gear indication prndl potential units summary	1	2	1	0	3	1	4	6	5	8	8	3	1	11	6	16	14	3	19
patentstorm patents automatic gear transmission patent automatic gear transmission patent patent storm gear -shift mechanism gear transmission shift-and-select lever	engineering	patentstorm patents automatic gear transmission patent automatic gear transmission patent patent storm gear shift mechanism gear transmission shift select lever	1	2	1	0	3	1	4	6	5	8	8	3	2	2	6	16	14	3	19
patentstorm patents claims automatic gearbox motor vehicles patent automatic gearbox motor vehicles patent patent storm invention automatic gearbox motor vehicles comprising	engineering	patentstorm patents claims automatic gearbox motor vehicles patent automatic gearbox motor vehicles patent patent storm automatic gearbox motor vehicles comprising	1	2	1	0	3	1	4	6	5	8	8	3	2	2	6	16	14	3	19
eng tips viewthread qid tribology engineering automatic gear lubrication systems curently running automatic gear lubrication systems grease gear system sag mill ball mill nickel concentrator	engineering	eng tips viewthread qid tribology engineering automatic gear lubrication systems curently running automatic gear lubrication systems grease gear system sag mill ball mill nickel concentrator	1	2	1	0	3	1	4	6	5	8	8	3	1	11	6	4	14	1	19
discounttire discount tire custom wheels truck car rims discount tire discount tire stores tires wheels rims terrain tires highway tires rugged terrain	engineering	discounttire discount tire custom wheels truck car rims discount tire discount tire stores tires wheels rims terrain tires highway tires rugged terrain	1	2	1	0	3	1	3	3	6	0	2	9	9	7	12	9	3	16	9
customwheel custom wheels chrome wheels chrome rims truck wheels car rims custom wheels rims distributor wholesale retail customers custom wheels tire packages chrome wheels chrome rims truck wheels	engineering	customwheel custom wheels chrome wheels chrome rims truck wheels car rims custom wheels rims distributor wholesale retail customers custom wheels tire packages chrome wheels chrome rims truck wheels	1	2	1	0	3	1	3	3	6	0	2	9	9	7	12	9	3	16	9
discountedwheelwarehouse custom wheels car rims truck rims chrome rims chrome wheels custom wheels car rims discount prices sell custom rims truck rims chrome rims wholesale prices shipping door	engineering	discountedwheelwarehouse custom wheels car rims truck rims chrome rims chrome wheels custom wheels car rims discount prices sell custom rims truck rims chrome rims wholesale prices shipping door	1	2	1	0	3	1	3	3	6	0	2	9	9	7	12	9	3	16	9
made china showroom chbigbear product detailroyeziqdxahn china full automatic atv with reverse gear automatic atv reverse gear st- china automatic atv reverse gear st- china atv quad atv quads quad atv quads atv atv quad	engineering	china showroom chbigbear product detailroyeziqdxahn china automatic atv reverse gear automatic atv reverse gear st china automatic atv reverse gear st china atv quad atv quads quad atv quads atv atv quad	1	2	1	0	3	1	4	6	5	0	8	11	1	11	2	7	14	1	7
customwheelsdirect custom wheels car truck rims chrome wheelz spinners tires brands dub wheels ultra wheels american racing reaction alloys focal wheels foose wheels asanti wheels lexani	engineering	customwheelsdirect custom wheels car truck rims chrome wheelz spinners tires brands dub wheels ultra wheels american racing reaction alloys focal wheels foose wheels asanti wheels lexani	1	2	1	0	3	1	3	3	6	0	2	9	9	7	12	9	3	16	9
lakeshorewheelandtire wheels rims tires car wheels chrome wheels lakeshore wheel car wheels custom wheels chrome rims replica wheels lakeshore wheel tire hubcaps wheelcovers tail lights centercaps	engineering	lakeshorewheelandtire wheels rims tires car wheels chrome wheels lakeshore wheel car wheels custom wheels chrome rims replica wheels lakeshore wheel tire hubcaps wheelcovers tail lights centercaps	1	2	1	0	3	1	3	3	6	0	2	9	9	7	12	9	3	16	9
autopartsdeal wheels wheels wheels trusted source wheels guarantee satisfaction buy array line wheels	engineering	autopartsdeal wheels wheels wheels trusted source wheels guarantee satisfaction buy array wheels	1	2	1	0	3	1	3	3	6	0	2	9	9	7	12	9	3	16	9
amazon wheels gravel road lucinda williams amazon com car wheels gravel road music lucinda amazon com car wheels gravel road music lucinda lucinda	engineering	amazon wheels gravel road lucinda williams amazon car wheels gravel road music lucinda amazon car wheels gravel road music lucinda lucinda	1	2	1	0	3	1	1	6	6	0	2	1	9	7	12	9	3	17	9
carbibles tyre bible car bibles wheel tyre bible wheel tyre bible covering wheels tyres tires rim tyre tread tread depth tread wear	engineering	carbibles tyre bible car bibles wheel tyre bible wheel tyre bible covering wheels tyres tires rim tyre tread tread depth tread wear	1	2	1	0	3	1	4	6	6	0	2	1	9	7	6	9	3	16	9
seriouswheels wheels classic sports muscle car pictures vintage classic muscle car pictures books pre-war american european custom	engineering	seriouswheels wheels classic sports muscle car pictures vintage classic muscle car pictures books pre war american european custom	1	2	1	0	3	1	1	6	6	0	2	1	9	7	6	9	3	17	9
wheelstudio chrome rims custom rims car rims truck rims staggered wheels staggered wheels car rims chrome rims custom wheel tires wholsale prices cars trucks suvs wheel tire packages shipped door	engineering	wheelstudio chrome rims custom rims car rims truck rims staggered wheels staggered wheels car rims chrome rims custom wheel tires wholsale prices cars trucks suvs wheel tire packages shipped door	1	2	1	0	3	1	3	3	6	0	2	9	9	7	12	9	3	16	9
rospa drivertraining info automatic automatic gearboxes understanding principles automatic gearbox appropriate decisions prevailing circumstances	engineering	rospa drivertraining info automatic automatic gearboxes understanding principles automatic gearbox decisions prevailing circumstances	1	2	1	0	3	1	4	6	5	8	8	3	2	2	6	16	14	3	19
wheeltech chrome wheels custom rims car wheels chrome custom wheels car rims tires auto accessories brand amg schnitzer kmc katana	engineering	wheeltech chrome wheels custom rims car wheels chrome custom wheels car rims tires auto accessories brand amg schnitzer kmc katana	1	2	1	0	3	1	3	3	6	0	2	9	9	7	12	9	3	16	9
made china showroom kaifenggroup product detailtozxfqmootcx china quad with automatic reverse gear quad automatic reverse gear china quads china quad automatic reverse gearand china quads quad quads quad mini quads mini quad quad automatic quads	engineering	china showroom kaifenggroup product detailtozxfqmootcx china quad automatic reverse gear quad automatic reverse gear china quads china quad automatic reverse gearand china quads quad quads quad mini quads mini quad quad automatic quads	1	2	1	0	3	1	4	6	5	0	8	11	1	11	2	7	14	1	7
bigwheels bigwheels net custom wheels chrome wheels alloy wheels car wheels selection custom wheels tires packages manufacturers cars vans suv online search	engineering	bigwheels bigwheels net custom wheels chrome wheels alloy wheels car wheels selection custom wheels tires packages manufacturers cars vans suv online search	1	2	1	0	3	1	3	3	6	0	2	9	9	7	12	9	3	16	9
wikipedia wiki semi automatic transmission semi- automatic transmission wikipedia encyclopedia semi- automatic transmission clutchless manual transmission automated manual transmission gear paddle shift gearbox system	engineering	wikipedia wiki semi automatic transmission semi automatic transmission wikipedia encyclopedia semi automatic transmission clutchless manual transmission automated manual transmission gear paddle shift gearbox system	1	2	1	0	3	1	4	6	5	8	8	3	2	2	6	16	14	3	19
autorepair about troubleshooting diagnose automatic transmission diagnose automatic transmission diagnose automatic transmission	engineering	autorepair troubleshooting diagnose automatic transmission diagnose automatic transmission diagnose automatic transmission	1	2	1	0	3	1	4	6	5	8	8	3	2	2	6	16	14	3	19
gears manufacturers automatic transmissions automatic transmissions automatic transmission fluid automatic automatic transmissions automatic transmission fluid automatic transmission gear automatic transmission components automatic transmission history	engineering	gears manufacturers automatic transmissions automatic transmissions automatic transmission fluid automatic automatic transmissions automatic transmission fluid automatic transmission gear automatic transmission components automatic transmission history	1	2	1	0	3	1	4	6	5	8	8	3	2	2	6	16	14	3	19
groups google group rec autos makers saturn browse thread thread sky automatic transmission rec autos makers saturn google driver manually overrides automatic gear selection mechanization options input device degree override	engineering	google rec autos makers saturn browse thread thread sky automatic transmission rec autos makers saturn google driver manually overrides automatic gear selection mechanization options input device degree override	1	2	1	0	3	1	4	6	5	8	8	3	2	2	6	16	14	3	19
amazon automatic shift carbon insert interior rgoas amazon com automatic gear knob bmw shift knob amazon com automatic gear knob bmw shift knob carbon fiber insert interior shift knobs auto shift knobs auto overdrive	engineering	amazon automatic shift carbon insert interior rgoas amazon automatic gear knob bmw shift knob amazon automatic gear knob bmw shift knob carbon fiber insert interior shift knobs auto shift knobs auto overdrive	1	2	1	0	3	1	4	6	5	8	8	3	2	2	6	16	14	3	19
globalspec featuredproducts detail bijurdelimoninternational automatic gear lubricator automatic gear lubricator bijur delimon international globalspec product announcement bijur delimon international lubricator compact motor-driven gear pump controlled output adjustable	engineering	globalspec featuredproducts detail bijurdelimoninternational automatic gear lubricator automatic gear lubricator bijur delimon international globalspec product announcement bijur delimon international lubricator compact motor driven gear pump controlled output adjustable	1	2	1	0	3	1	4	6	5	8	8	3	1	11	6	4	14	1	19
wipo pctdb automatic gear shifting manual transmission automatic gear shifting manual transmission capable structure complicated	engineering	wipo pctdb automatic gear shifting manual transmission automatic gear shifting manual transmission capable structure complicated	1	2	1	0	3	1	4	6	5	8	8	3	2	2	6	16	14	3	19
rentacarbulgaria hire automatic gearbox cars index cars vehicles automatic transmission gearbox rent rent automatic gearbox car bulgaria hire automatic car ski resorts sea resorts sofia varna burgas	engineering	rentacarbulgaria hire automatic gearbox cars cars vehicles automatic transmission gearbox rent rent automatic gearbox car bulgaria hire automatic car ski resorts sea resorts sofia varna burgas	1	2	1	0	3	1	4	6	5	8	8	3	2	2	6	16	14	3	19
monotorque who monotorque automatic gear bikes automatic gear beginners people technical inclination deal constant shifting cruising	engineering	monotorque monotorque automatic gear bikes automatic gear beginners people technical inclination deal constant shifting cruising	1	2	1	0	3	1	4	6	5	8	8	3	1	11	6	16	14	3	19
visitbulgaria rentacar automatic cars automatic transmission gear box rent bulgaria cars automatic gear box ford scorpio link toyota avensis link	engineering	visitbulgaria rentacar automatic cars automatic transmission gear box rent bulgaria cars automatic gear box ford scorpio link toyota avensis link	1	2	1	0	3	1	4	6	5	8	8	3	2	11	6	16	14	3	19
samarins check transmission check transmission discover transmission gear oil oil manual transmission automatic transmission guess minutes driving kill	engineering	samarins check transmission check transmission discover transmission gear oil oil manual transmission automatic transmission guess minutes driving kill	1	2	1	0	3	1	4	6	5	8	8	3	2	2	6	16	14	3	19
amazon tartan trader automatic stick keyring sofwqu amazon automatic gear stick keyring kitchen home amazon automatic gear stick keyring kitchen home	engineering	amazon tartan trader automatic stick keyring sofwqu amazon automatic gear stick keyring kitchen amazon automatic gear stick keyring kitchen	1	2	1	0	3	1	4	6	5	8	8	3	1	2	6	16	14	3	19
alibaba catalog automatic transmission fluid automatic transmission fluid sawi qaddah exporting sawi qaddah exporting car spare alibaba supplier manufactures automatic transmission fluid egypt	engineering	alibaba catalog automatic transmission fluid automatic transmission fluid sawi qaddah exporting sawi qaddah exporting car spare alibaba supplier manufactures automatic transmission fluid egypt	1	2	1	0	3	1	4	6	5	8	8	3	1	11	6	16	14	3	19
wipo pctdb selector device vehicle automatic invention selector device gearbox vehicle automatic gear system comprising shift lever kinematic	engineering	wipo pctdb selector device vehicle automatic selector device gearbox vehicle automatic gear system comprising shift lever kinematic	1	2	1	0	3	1	4	6	5	8	8	3	2	2	6	16	14	3	19
campingandcaravanningclub download path documents manual versus automatic which transmission manual versus automatic transmission gearbox transmission vehicle body automatic gear leading edge technology four-speed automatic gearbox panel	engineering	campingandcaravanningclub download path documents manual versus automatic transmission manual versus automatic transmission gearbox transmission vehicle body automatic gear leading edge technology speed automatic gearbox panel	1	2	1	0	3	1	4	6	5	8	8	3	2	2	6	16	14	3	19
acronyms thefreedictionary automatic gear box automatic gear box agb acronyms agb definition automatic gear box acronyms abbreviations online dictionary thesaurus	engineering	acronyms thefreedictionary automatic gear box automatic gear box agb acronyms agb definition automatic gear box acronyms abbreviations online dictionary thesaurus	1	2	1	0	3	1	4	6	5	8	8	3	2	3	6	16	14	3	19
ivfnj ivf jersey ivf egg donation blastocyst transfer icsi ivf jersey quality infertility care patients	health	ivfnj ivf jersey ivf egg donation blastocyst transfer icsi ivf jersey quality infertility care patients	0	0	2	3	5	2	0	4	7	5	5	2	6	3	8	14	4	0	13
medicalnewstoday articles medical treatment infertility compromised complementary therapies assisted reproduction diminish effectiveness medical treatment infertility women scientist	health	medicalnewstoday articles medical treatment infertility compromised complementary therapies assisted reproduction diminish effectiveness medical treatment infertility women scientist	0	0	2	3	5	2	0	4	7	5	5	7	6	3	8	14	4	15	13
travel state gov visa temp types types visitor visas business pleasure documentation requirements documentation persons medical treatment	health	travel gov visa temp types types visitor visas business pleasure documentation requirements documentation persons medical treatment	0	0	2	3	5	2	7	7	2	6	5	7	0	12	8	14	4	15	13
bmj bmjjournals cgi content full medical treatment tuberculosis chan iseman medical treatment tuberculosis lawrence ormerod ian campbell peter davies atle fretheim iseman chan	health	bmj bmjjournals cgi content medical treatment tuberculosis chan iseman medical treatment tuberculosis lawrence ormerod ian campbell peter davies atle fretheim iseman chan	0	0	2	3	5	2	0	4	2	6	5	11	8	3	10	0	5	15	15
medical library online medical treatment online medical treatment advisor treatments online treatment advice symptoms illnesses diseases mental disorders treatment patient symptoms	health	medical library online medical treatment online medical treatment advisor treatments online treatment advice symptoms illnesses diseases mental disorders treatment patient symptoms	0	0	2	3	5	2	7	7	7	6	3	7	0	4	10	14	5	15	13
amazon current medical diagnosis treatment amazon com medical diagnosis treatment amazon com medical diagnosis treatment medical diagnosis treatment books lawrence tierney stephen mcphee maxine	health	amazon current medical diagnosis treatment amazon medical diagnosis treatment amazon medical diagnosis treatment medical diagnosis treatment books lawrence tierney stephen mcphee maxine	0	0	2	3	5	2	0	7	7	6	3	11	0	3	10	10	5	15	15
gov emshg docs radiologic medical countermeasures department homeland security radiological definite nausea vomiting medical evaluation treatment radioactivity contamination measured units bequerels	health	gov emshg docs radiologic medical countermeasures department homeland security radiological definite nausea vomiting medical evaluation treatment radioactivity contamination measured units bequerels	1	0	2	3	5	2	0	4	2	6	5	11	8	1	10	5	15	4	14
religioustolerance medical religious reject medical treatment favor prayer dozens children die parents withhold medical treatment religious children beaten	health	religioustolerance medical religious reject medical treatment favor prayer dozens children die parents withhold medical treatment religious children beaten	0	0	2	3	5	2	0	7	7	6	3	7	0	3	10	5	5	15	15
amazon children starving brains treatment spectrum amazon com children starving brains medical treatment amazon com children starving brains medical treatment guide autism spectrum disorder edition books jaquelyn mccandless jaquelyn	health	amazon children starving brains treatment spectrum amazon children starving brains medical treatment amazon children starving brains medical treatment guide autism spectrum disorder edition books jaquelyn mccandless jaquelyn	0	0	2	3	5	2	0	7	7	6	3	11	0	3	10	5	5	15	15
accessmedicine resourcetoc resourceid accessmedicine toc medical diagnosis treatment stephen mcphee maxine papadakis lawrence tierney eds ralph gonzales roni zeiger	health	accessmedicine resourcetoc resourceid accessmedicine toc medical diagnosis treatment stephen mcphee maxine papadakis lawrence tierney eds ralph gonzales roni zeiger	0	0	2	3	5	2	0	7	7	6	3	11	0	3	10	10	5	15	15
wikipedia wiki medicine medicine wikipedia encyclopedia care medical services physicians health professionals contact patient medical treatment	health	wikipedia wiki medicine medicine wikipedia encyclopedia care medical services physicians health professionals contact patient medical treatment	0	0	2	3	5	2	0	4	2	6	3	7	6	4	8	0	2	0	4
addmtc home medical treatment center santa clara valley articles behaviors diagnosis treatment positive aspects disorder	health	addmtc medical treatment center santa clara valley articles behaviors diagnosis treatment positive aspects disorder	0	0	2	3	5	2	0	7	7	6	3	7	0	3	10	14	5	15	15
cms hhs gov emtala overview congress enacted emergency medical treatment labor act emergency medical treatment labor act technical advisory emtala tag	health	cms hhs gov emtala overview congress enacted emergency medical treatment labor emergency medical treatment labor technical advisory emtala tag	1	0	2	3	5	0	0	7	2	6	5	10	0	4	10	14	5	0	4
emedicine ent topic emedicine inner ear meniere disease medical treatment inner ear meniere disease medical treatment evaluation management dizziness vertigo medical tasks	health	emedicine ent topic emedicine ear meniere disease medical treatment ear meniere disease medical treatment evaluation management dizziness vertigo medical tasks	0	0	2	3	5	2	0	7	7	6	3	7	0	4	10	14	5	15	13
usdoctor pms pms suffers medical treatment marked mood behavioral symptoms taper	health	usdoctor pms pms suffers medical treatment marked mood behavioral symptoms taper	0	0	2	3	5	2	0	7	7	6	3	11	0	3	10	5	5	15	15
massgeneral medical treatment physician patient information- mass mgh physicians specialize patient care treatment diseases health issues mgh teaching research hospital	health	massgeneral medical treatment physician patient mass mgh physicians specialize patient care treatment diseases health issues mgh teaching hospital	0	0	2	3	5	2	0	7	7	6	3	10	8	4	10	14	5	0	13
mayoclinic mayo clinic medical treatment research centers mayo clinic medical centers treatment options specialties cancer cardiology neurology transplant services minnesota	health	mayoclinic mayo clinic medical treatment centers mayo clinic medical centers treatment options specialties cancer cardiology neurology transplant services minnesota	0	0	2	3	5	2	0	7	2	6	3	7	6	4	8	0	2	0	4
americanheart presenter identifier medical treatment children heart blood vessel defects don surgery children surgery benefit medical treatment	health	americanheart presenter identifier medical treatment children heart blood vessel defects don surgery children surgery benefit medical treatment	0	0	2	3	5	2	7	7	7	6	11	7	0	4	10	14	4	15	13
healthrecovery alcoholism treatment program natural health supplements learn alcoholism addiction treatment program promise treatment regimens alcoholism medical treatment	health	healthrecovery alcoholism treatment program natural health supplements learn alcoholism addiction treatment program promise treatment regimens alcoholism medical treatment	0	0	2	3	5	2	7	7	7	6	3	11	0	4	4	5	15	0	13
wrongdiagnosis treatment medical treatment center wrongdiagnosis com medical information symptoms diagnosis misdiagnosis conditions diseases research symptoms symptoms center research	health	wrongdiagnosis treatment medical treatment center wrongdiagnosis medical symptoms diagnosis misdiagnosis conditions diseases symptoms symptoms center	0	0	2	3	5	2	7	7	7	6	3	7	0	3	10	14	5	15	13
wikipedia wiki illness illness wikipedia encyclopedia conditions fulfilled illness ill illnesses disease	health	wikipedia wiki illness illness wikipedia encyclopedia conditions fulfilled illness ill illnesses disease	0	0	2	3	5	2	0	7	7	6	3	7	0	4	8	14	5	0	13
princeton edu rcurtis altitude guide altitude acclimatization illnesses description altitude illnesses symptoms treatment	health	princeton rcurtis altitude guide altitude acclimatization illnesses description altitude illnesses symptoms treatment	0	0	2	3	5	2	7	7	7	6	3	11	0	1	10	14	5	15	13
cdc gov ncidod dbmd diseaseinfo foodborneinfections disease listing foodborne illness information cdc faq discussing causes preventions foodborne diseases	health	cdc gov ncidod dbmd diseaseinfo foodborneinfections disease listing foodborne illness cdc faq discussing preventions foodborne diseases	0	0	2	3	5	2	7	7	7	6	11	7	0	4	10	14	5	15	13
aamft american association marriage family therapy professional marriage family therapists united canada abroad	health	aamft american association marriage family therapy professional marriage family therapists united canada abroad	0	0	2	3	1	2	0	4	2	10	3	10	6	3	2	5	2	5	4
getyourhealthylife healthylife products information sleep slim sleep slim menopause solution healthy life information products nature lose	health	getyourhealthylife healthylife products sleep slim sleep slim menopause solution healthy life products nature lose	0	0	2	3	5	2	7	4	7	5	10	2	4	10	13	15	13	14	0
aamft therapistlocator index therapistlocator net home page marriage family therapist united canada overseas therapists listed therapistlocator net	health	aamft therapistlocator therapistlocator net marriage family therapist united canada overseas therapists listed therapistlocator net	0	0	2	3	1	2	0	4	2	10	3	10	6	3	2	5	2	5	4
algonet leif amfaqigr amalgam-related illness faq information resources negative health effects dental amalgam-fillings	health	algonet leif amfaqigr amalgam illness faq resources negative health effects dental amalgam fillings	0	0	2	3	5	2	7	7	7	5	3	11	8	12	8	15	15	10	0
improvingchroniccare home chronic illness care research resources model promote interaction patient care givers elements community self-management	health	improvingchroniccare chronic illness care resources model promote interaction patient care givers elements community management	0	0	2	3	5	2	0	7	7	6	3	7	6	4	8	5	5	0	4
gulflink osd mil office assistant gulf war illnesses government declassified documents potential relevance affected personnel	health	gulflink osd mil office assistant gulf war illnesses government declassified documents potential relevance personnel	1	2	3	2	3	4	2	5	6	8	4	5	7	1	14	16	11	4	19
chi sagepub chronic illness search journal chronic illness welcome trial period chronic illness online archive	health	chi sagepub chronic illness search journal chronic illness trial period chronic illness online archive	0	0	2	3	5	2	0	7	7	6	3	7	0	4	8	14	5	0	13
osha gov oshstats work injury illness incidence rates injury illness characteristics demographic characteristics work-related injuries illnesses fatalities	health	osha gov oshstats injury illness incidence rates injury illness characteristics demographic characteristics injuries illnesses fatalities	0	0	2	3	5	2	0	7	7	6	3	7	0	4	8	14	5	0	4
askdrsears childhood illnesses childhood illnesses medicine cabinet index childhood illness index abdominal pain abdominal pain chronic acidophilus allergies	health	askdrsears childhood illnesses childhood illnesses medicine cabinet childhood illness abdominal pain abdominal pain chronic acidophilus allergies	0	0	2	3	5	2	0	7	7	6	3	11	8	4	10	15	5	0	13
ifred ifred international foundation research education organizations deal mental illness focus internationally depression encouraging enlightening	health	ifred ifred international foundation education organizations deal mental illness focus internationally depression encouraging enlightening	0	0	2	3	5	2	7	7	7	6	3	7	8	4	8	14	15	0	13
bls gov iif injuries illnesses fatalities home page bureau labor statistics reports workplace injuries illnesses fatalities	health	bls gov iif injuries illnesses fatalities bureau labor statistics reports workplace injuries illnesses fatalities	0	0	2	3	5	2	0	7	7	6	3	7	0	4	8	14	5	0	4
chronicillnet chronicillnet org multimedia information source dedicated chronic illnesses aids cancer persian gulf war syndrome autoimmune diseases neurological	health	chronicillnet chronicillnet org multimedia source dedicated chronic illnesses aids cancer persian gulf war syndrome autoimmune diseases neurological	0	0	2	3	5	2	7	7	7	6	11	7	0	4	10	14	5	15	13
slashdot slashdot slashdot article slashdot cell towers responsible illness cell towers responsible illness article communications biotech wireless networking science	health	slashdot slashdot slashdot article slashdot cell towers responsible illness cell towers responsible illness article communications biotech wireless networking science	0	0	2	3	5	2	0	4	2	6	10	7	0	12	8	5	15	0	4
healingwell healingwell com guide diseases disorders chronic illness resources diseases disorders chronic illness medical news information articles community message forums chat email books	health	healingwell healingwell guide diseases disorders chronic illness resources diseases disorders chronic illness medical news articles community message forums chat email books	0	0	2	3	5	2	7	7	7	6	3	7	0	4	10	14	5	15	13
cfsan fda gov mow foodborn fda cfsan foodborne illness directory sites information foodborne illnesses	health	cfsan fda gov mow foodborn fda cfsan foodborne illness directory sites foodborne illnesses	0	0	2	3	5	2	7	7	7	6	3	11	8	4	4	15	15	0	13
nami illness index nami illness information resources mental illnesses	health	nami illness nami illness resources mental illnesses	0	0	2	3	5	2	0	7	7	6	3	7	8	4	8	5	15	0	13
nami nami national alliance mental illness -the nation voice national alliance mental illness nonprofit grassroots self-help advocacy organization consumers families friends	health	nami nami national alliance mental illness nation voice national alliance mental illness nonprofit grassroots advocacy organization consumers families friends	0	0	2	3	5	2	7	7	7	6	3	7	8	4	8	5	15	0	13
digestive niddk nih gov ddiseases pubs bacteria bacteria foodborne illness discusses causes risk factors complications foodborne illness reviews treatment options prevention strategies	health	digestive niddk nih gov ddiseases pubs bacteria bacteria foodborne illness discusses risk factors complications foodborne illness reviews treatment options prevention strategies	0	0	2	3	5	2	7	7	7	6	11	7	0	4	10	14	5	15	13
nlm nih gov medlineplus heatillness medlineplus heat illness resources sheets heat illnesses	health	nlm nih gov medlineplus heatillness medlineplus heat illness resources sheets heat illnesses	0	0	2	3	5	2	7	7	7	6	10	7	0	4	10	15	5	14	13
wikipedia wiki mental illness mental illness wikipedia encyclopedia mental illness mental disorder mental health conditions characterized distress impaired cognitive functioning	health	wikipedia wiki mental illness mental illness wikipedia encyclopedia mental illness mental disorder mental health conditions characterized distress impaired cognitive functioning	0	0	2	3	5	2	0	7	7	6	3	7	0	4	8	5	5	0	13
mjbovo affirmations affirmations healthy life positive belief maybe try visualizations life	health	mjbovo affirmations affirmations healthy life positive belief visualizations life	0	0	2	3	5	2	7	7	7	5	10	2	4	10	13	15	13	10	0
uhc health insurance quotes medical insurance unitedhealthcare communicating commitment health care experience advertising campaign deploying nationally employers	health	uhc health insurance quotes medical insurance unitedhealthcare communicating commitment health care experience advertising campaign deploying nationally employers	0	0	2	3	5	2	0	4	7	4	10	7	6	4	8	0	4	0	4
mediamaxevents media max events expos minneapolis producer home healthy life expo event planners suppliers expo home improvement expo producer consumer tradeshow home improvement	health	mediamaxevents media max events expos minneapolis producer healthy life expo event planners suppliers expo improvement expo producer consumer tradeshow improvement	1	0	1	0	3	1	6	6	5	4	1	1	7	11	5	9	3	10	19
networkworld topics healthcare healthcare network world healthcare research center source news networking healthcare vertical market	health	networkworld topics healthcare healthcare network healthcare center source news networking healthcare vertical market	0	0	2	3	5	2	0	4	2	4	5	7	8	12	8	0	4	0	17
hotjobs yahoo jobs healthcare healthcare jobs yahoo hotjobs search healthcare jobs healthcare job search yahoo hotjobs jobs listed daily	health	hotjobs yahoo jobs healthcare healthcare jobs yahoo hotjobs search healthcare jobs healthcare job search yahoo hotjobs jobs listed daily	0	0	2	3	5	6	0	4	2	4	5	10	6	4	8	0	4	0	18
healthcare informatics healthcare informatics monthly magazine informatics managers	health	healthcare informatics healthcare informatics monthly magazine informatics managers	0	0	2	3	1	6	0	4	2	6	5	10	8	12	1	0	3	12	18
uhc health insurance quotes medical insurance unitedhealthcare approach affordable flexible healthcare businesses communicating commitment health care experience	health	uhc health insurance quotes medical insurance unitedhealthcare approach affordable flexible healthcare businesses communicating commitment health care experience	0	0	2	3	5	2	0	4	7	4	10	7	6	4	8	0	4	0	4
bls gov oco cgs health care industry health care jobs— jobs wage salary workers jobs	health	bls gov oco cgs health care industry health care jobs wage salary workers jobs	0	0	2	3	5	0	0	7	2	4	3	10	6	4	8	14	4	0	4
healthcare healthcare com healthcare healthcare com medical website information	health	healthcare healthcare healthcare healthcare medical website	0	0	2	3	5	2	0	4	2	4	5	10	8	12	8	0	4	0	4
healthcareitnews healthcare news editors healthcare news nhinwatch com comprehensive web covering creation nationwide health	health	healthcareitnews healthcare news editors healthcare news nhinwatch comprehensive web covering creation nationwide health	0	0	2	3	5	2	0	7	2	4	5	7	8	12	8	0	4	0	18
thomson solutions healthcare thomson healthcare healthcare cost quality clinical decision tool handhelds evidence-based reference guide healthcare outcomes benchmarking database	health	thomson solutions healthcare thomson healthcare healthcare cost quality clinical decision tool handhelds evidence based reference guide healthcare outcomes benchmarking database	0	0	2	3	5	2	0	4	2	4	5	10	8	12	8	0	4	0	4
content monster getthejob industry home monster healthcare interview resume salary job advice job effective resume writing interview skills salary negotiation monster getting job	health	content monster getthejob industry monster healthcare interview resume salary job advice job effective resume writing interview skills salary negotiation monster job	0	1	2	1	2	0	4	1	1	4	2	12	4	0	4	3	16	3	18
whitehouse gov infocus healthcare health care president commends house action patients bill rights remarks president inova fair oaks hospital remarks president specialty	health	whitehouse gov infocus healthcare health care president commends house action patients bill rights remarks president inova fair oaks hospital remarks president specialty	1	2	3	1	1	6	4	4	2	2	5	10	9	10	3	14	3	8	4
forbes healthcare healthcare news pharmaceutical news forbes com health care news financial markets coverage personal finance advice tools investing tips forbes affiliated publications	health	forbes healthcare healthcare news pharmaceutical news forbes health care news financial markets coverage personal finance advice tools investing tips forbes affiliated publications	0	0	2	3	5	2	4	5	7	4	8	3	6	14	3	4	3	1	17
health care careerbuilder health care jobs medical jobs hospital jobs careerbuilder com health care jobs job search careerbuilder leader job search sites access jobs	health	health care careerbuilder health care jobs medical jobs hospital jobs careerbuilder health care jobs job search careerbuilder leader job search sites access jobs	0	0	2	3	5	0	0	4	2	4	5	10	6	4	8	0	4	0	4
wikipedia wiki health care health care wikipedia encyclopedia health care healthcare prevention treatment management illness preservation mental physical	health	wikipedia wiki health care health care wikipedia encyclopedia health care healthcare prevention treatment management illness preservation mental physical	0	0	2	3	5	2	0	7	7	6	3	7	6	4	8	14	5	0	4
kidshealth kid grownup conditions heart disease heart disease heart disease cardiovascular disease affects people article kids	health	kidshealth kid grownup conditions heart disease heart disease heart disease cardiovascular disease people article kids	0	0	2	3	5	2	7	7	7	6	11	7	0	4	10	14	5	10	13
perio consumer mbc heart connection gum disease heart disease stroke research reviewed american academy periodontology theories link periodontal disease heart	health	perio consumer mbc heart connection gum disease heart disease stroke reviewed american academy periodontology theories link periodontal disease heart	0	0	2	3	5	2	7	7	7	6	11	7	0	4	10	14	4	10	13
emedicinehealth coronary heart disease article coronary heart disease coronary heart disease chd coronary artery disease affects women united disease	health	emedicinehealth coronary heart disease article coronary heart disease coronary heart disease chd coronary artery disease women united disease	0	0	2	3	5	2	7	7	7	6	11	7	0	4	10	14	4	10	13
labtestsonline understanding conditions heart heart disease overview heart disease heart -related conditions tests cholesterol hdl ldl triglycerides lipid profile	health	labtestsonline understanding conditions heart heart disease overview heart disease heart conditions tests cholesterol hdl ldl triglycerides lipid profile	0	0	2	3	5	2	7	7	7	5	11	7	0	4	10	14	4	10	13
therapistunlimited therapist unlimited online directory therapists drug rehabs therapist unlimted listings therapists drug rehabs counseling centers non-profit orgs listings directory broken	health	therapistunlimited therapist unlimited online directory therapists drug rehabs therapist unlimted listings therapists drug rehabs counseling centers profit orgs listings directory broken	0	0	2	3	5	2	0	4	2	4	3	10	6	4	8	0	2	0	4
americanheart presenter identifier risk factors coronary heart disease clinical statistical studies factors risk coronary heart disease heart attack	health	americanheart presenter identifier risk factors coronary heart disease clinical statistical studies factors risk coronary heart disease heart attack	0	0	2	3	5	2	7	7	7	6	11	7	0	4	10	14	4	10	13
ahrq gov agency healthcare research quality ahrq home page povides practical health care information research findings data help consumers health providers health insurers researchers policymakers	health	ahrq gov agency healthcare quality ahrq povides practical health care findings data consumers health providers health insurers researchers policymakers	0	0	2	3	5	2	7	7	7	6	5	7	6	10	4	5	4	0	2
americanheart presenter identifier healthy lifestyle lifestyle habits help risk heart attack learn help heart disease stroke	health	americanheart presenter identifier healthy lifestyle lifestyle habits risk heart attack learn heart disease stroke	0	0	2	3	5	2	7	7	7	5	11	7	0	4	13	14	4	10	13
gehealthcare healthcare services medical imaging information technologies medical diagnostics patient monitoring systems disease research drug discovery	health	gehealthcare healthcare services medical imaging technologies medical diagnostics patient monitoring systems disease drug discovery	0	0	2	3	5	2	7	4	7	6	3	7	0	4	10	5	4	0	15
boston business healthcare healthcare healthcare news boston com boston globe healthcare business coverage england hospitals biotech companies life science industries	health	boston business healthcare healthcare healthcare news boston boston globe healthcare business coverage england hospitals biotech companies life science industries	0	0	2	3	5	2	0	4	2	4	5	10	6	12	8	0	4	0	4
longevitymeme topics healthy life extension community healthy life extension community healthy life extension community discussed referenced website understanding community	health	longevitymeme topics healthy life extension community healthy life extension community healthy life extension community discussed referenced website understanding community	0	0	2	3	5	2	7	7	7	5	10	2	4	10	13	15	4	14	0
girlshealth gov fitness index fitness home mind news nutrition relationships safety speak spotlight vote girlshealth gov logo fitness steps healthy life	health	girlshealth gov fitness fitness mind news nutrition relationships safety speak spotlight vote girlshealth gov logo fitness steps healthy life	0	0	2	3	5	2	7	7	7	5	10	2	4	10	13	15	13	14	0
health utah gov opha publications brfss briefs healthy life healthy life life table computations healthy life molla buescher gizlice healthy life expectancy	health	health utah gov opha publications brfss briefs healthy life healthy life life table computations healthy life molla buescher gizlice healthy life expectancy	0	0	2	3	5	2	7	7	7	5	10	2	4	10	13	15	13	14	0
herhealthylife herhealthylife org healthy life public education campaign women steps health eating exercising	health	herhealthylife herhealthylife org healthy life public education campaign women steps health eating exercising	0	0	2	3	5	2	7	7	7	5	10	7	4	10	13	15	4	14	0
cdc gov women tips cdc women health tips healthy life tips healthy life women click links learn pay attention health healthy living life	health	cdc gov women tips cdc women health tips healthy life tips healthy life women click links learn pay attention health healthy living life	0	0	2	3	5	2	7	7	7	5	10	7	4	10	13	15	4	14	0
who int inf life pr- issues healthy life expectancy rankings japanese healthy life expectancy countries versus lowest-ranking country sierra	health	int inf life pr issues healthy life expectancy rankings japanese healthy life expectancy countries versus lowest ranking country sierra	0	0	2	3	5	2	7	7	7	5	10	2	4	10	13	15	13	14	0
releasingfat releasing fat healthy life ray strand developing healthy lifestyles learn learn learn	health	releasingfat releasing fat healthy life ray strand developing healthy lifestyles learn learn learn	0	0	2	3	5	2	7	7	7	5	10	2	4	10	13	15	13	14	0
longevitymeme start healthy life extension introduction healthy life extension healthy life extension utilizing science healthy life span risk suffering age-related conditions	health	longevitymeme start healthy life extension introduction healthy life extension healthy life extension utilizing science healthy life span risk suffering age conditions	0	0	2	3	5	2	7	7	7	5	10	2	4	10	13	15	4	14	0
azfamily health living vitindex healthy life phoenix news azfamily ktvk news phoenix doctor annual exam isn people priority checkups help learn stay healthy	health	azfamily health living vitindex healthy life phoenix news azfamily ktvk news phoenix doctor annual exam isn people priority checkups learn stay healthy	0	0	2	3	5	2	7	7	7	5	10	2	4	4	4	15	4	14	0
healthylife healthy life healthy life articles articles herbal remedies homeopathy weight control womens health fitness	health	healthylife healthy life healthy life articles articles herbal remedies homeopathy weight control womens health fitness	0	0	2	3	5	2	7	7	7	5	10	2	4	10	13	15	13	14	0
healthylife american institute preventive medicine world renowned award winning developer provider wellness medical self-care disease management health management programs	health	healthylife american institute preventive medicine renowned award winning developer provider wellness medical care disease management health management programs	0	0	2	3	5	2	0	7	7	6	3	7	6	4	8	0	4	0	4
library thinkquest jump healthy life thinkquest crew teaches kids jumping rope jump rope skills quiz information exercise heart healthy bodies fit	health	library thinkquest jump healthy life thinkquest crew teaches kids jumping rope jump rope skills quiz exercise heart healthy bodies fit	0	0	2	3	5	1	7	7	1	5	10	2	4	10	13	3	13	14	0
healthylifebread healthy life bread healthy life diet bread carbohydrate calorie fiber diet healthy life varieties sold	health	healthylifebread healthy life bread healthy life diet bread carbohydrate calorie fiber diet healthy life varieties sold	0	0	2	3	5	2	7	7	7	5	10	2	4	10	13	15	13	14	0
depts washington edu uwcoe healthtopics healthylife leading healthy life steps living staying healthy mind healthy stress life ideas reducing stress try web	health	depts washington uwcoe healthtopics healthylife leading healthy life steps living staying healthy mind healthy stress life ideas reducing stress web	0	0	2	3	5	2	7	7	7	5	10	2	4	10	13	15	13	10	0
cdc gov men tips cdc health tips healthy life health information tips research centers disease control prevention	health	cdc gov tips cdc health tips healthy life health tips centers disease control prevention	0	0	2	3	5	2	7	7	7	5	10	7	4	10	13	15	4	14	13
healthylife healthylife net home positive radio network airs live all-positive programming mind body spirit topics eclectic music	health	healthylife healthylife net positive radio network airs live positive programming mind body spirit topics eclectic music	0	0	2	3	5	2	0	7	7	5	3	2	4	10	13	9	13	10	15
modernhealthcare modern healthcare online updated health-care industry news features crain communications	health	modernhealthcare modern healthcare online updated health care industry news features crain communications	0	0	2	3	5	6	0	3	2	4	5	10	8	10	8	14	3	1	2
ahca american health care association information american health care association ahca non-profit federation affiliated health organizations	health	ahca american health care association american health care association ahca profit federation affiliated health organizations	0	0	2	3	5	2	0	7	2	4	5	10	6	12	4	15	4	0	4
boston jobs healthcare healthcare jobs boston com behavioral health radiology services provider magellan health services inc second-quarter profit percent costs	health	boston jobs healthcare healthcare jobs boston behavioral health radiology services provider magellan health services quarter profit percent costs	0	0	2	3	5	2	0	4	2	4	5	10	6	4	8	0	4	0	4
healthcarecommission homepage healthcare commission healthcare commission promotes improvement quality nhs independent healthcare	health	healthcarecommission homepage healthcare commission healthcare commission promotes improvement quality nhs independent healthcare	0	0	2	3	1	2	0	4	2	4	5	10	8	11	1	0	15	17	18
therapists psychologytoday psychology therapist personal profiles specialties search city zip code	health	therapists psychologytoday psychology therapist personal profiles specialties search city zip code	0	0	2	3	5	0	0	4	2	4	3	10	6	3	2	0	2	5	4
publicagenda issues frontdoor issue medicare public agenda guide medicare medicare national health-insurance plan elderly disabled social security people serves popularity	health	publicagenda issues frontdoor issue medicare public agenda guide medicare medicare national health insurance plan elderly disabled social security people serves popularity	1	0	2	3	5	0	3	4	7	9	5	10	6	4	4	0	15	0	4
bls gov oco ocos occupational therapists occupational therapists supervisory roles assistants aides clients guidance	health	bls gov oco ocos occupational therapists occupational therapists supervisory roles assistants aides clients guidance	0	0	2	3	5	0	0	4	2	4	3	10	6	4	8	5	2	5	4
nlm nih gov medlineplus medicare medlineplus medicare medicare government health insurance program people age people age qualify medicare	health	nlm nih gov medlineplus medicare medlineplus medicare medicare government health insurance program people age people age qualify medicare	1	0	2	3	5	0	3	4	7	9	5	10	6	4	4	0	15	0	4
whitehouse gov infocus medicare strengthening medicare framework modernize medicare principles president medicare reform plans	health	whitehouse gov infocus medicare strengthening medicare framework modernize medicare principles president medicare reform plans	1	0	3	1	1	0	3	4	0	9	5	10	6	8	4	0	15	0	4
wikipedia wiki medicare united states medicare united wikipedia encyclopedia article medicare united insurance program programs countries medicare	health	wikipedia wiki medicare united medicare united wikipedia encyclopedia article medicare united insurance program programs countries medicare	1	0	2	3	5	0	3	4	0	9	5	10	6	4	8	0	15	0	4
ssa gov pubs medicare automated system address request replacement medicare card deaf hearing	health	ssa gov pubs medicare automated system address request replacement medicare card deaf hearing	1	0	2	3	5	0	3	4	0	9	5	10	6	4	4	0	15	0	4
ssa gov mediinfo medicare resources page links information medicare medicaid programs premiums instructions request replacement	health	ssa gov mediinfo medicare resources links medicare medicaid programs premiums instructions request replacement	1	0	2	3	5	0	3	4	0	9	5	10	6	4	4	0	15	0	4
cms hhs gov home medicare medicare people medicare family caregivers visit medicare gov government people medicare	health	cms hhs gov medicare medicare people medicare family caregivers visit medicare gov government people medicare	1	0	2	3	5	0	3	4	0	9	5	10	6	4	4	0	15	0	4
cms hhs gov centers medicare medicaid services federal agency administers medicare medicaid children health insurance program information health professionals	health	cms hhs gov centers medicare medicaid services federal agency administers medicare medicaid children health insurance program health professionals	1	0	2	3	5	0	3	4	0	9	5	10	6	4	4	0	15	0	4
medicare medicare org senior resource center medicare information medicare information source consumer beneficiary website access information medicare medicare health plans contact information	health	medicare medicare org senior resource center medicare medicare source consumer beneficiary website access medicare medicare health plans contact	1	0	2	3	5	0	3	4	7	9	5	10	6	4	4	0	15	0	4
law cornell edu wex index medicare medicare wex medicare enacted president lyndon society programs version medicare foundas	health	law cornell wex medicare medicare wex medicare enacted president lyndon society programs version medicare foundas	1	0	3	1	1	0	3	4	0	9	5	10	6	8	4	0	15	0	4
medicare gov medicareeligibility home medicare medicare eligibility enrollment premiums search medicare plans nursing homes dialysis facilities medigap insurance medical assistance	health	medicare gov medicareeligibility medicare medicare eligibility enrollment premiums search medicare plans nursing homes dialysis facilities medigap insurance medical assistance	1	0	2	3	5	0	3	4	0	9	5	10	6	4	4	0	15	0	4
mdanderson patients public about cancer display bacd aec bdcce method displayfull understanding treatments surgery cancer center surgery cancer treatment cancer patients surgery combination therapies	health	mdanderson patients public cancer display bacd aec bdcce method displayfull understanding treatments surgery cancer center surgery cancer treatment cancer patients surgery combination therapies	0	0	2	3	5	2	7	7	7	6	5	7	0	4	10	14	4	15	13
thefreedictionary surgery surgery definition surgery online dictionary definition surgery online dictionary surgery surgery mean surgery synonyms surgery antonyms information surgery	health	thefreedictionary surgery surgery definition surgery online dictionary definition surgery online dictionary surgery surgery surgery synonyms surgery antonyms surgery	0	0	2	3	5	2	0	7	2	6	3	7	0	4	10	10	5	0	4
surgery upmc edu university pittsburgh department surgery home department surgery university pittsburgh pittsburgh pennsylvania pitt school medicine world-renowned clinicians	health	surgery upmc university pittsburgh department surgery department surgery university pittsburgh pittsburgh pennsylvania pitt school medicine renowned clinicians	0	0	2	3	5	2	0	7	2	6	5	11	6	4	10	0	2	0	4
cancer docroot eto content eto surgery acs surgery surgery treatment cancer role diagnosis staging cancer	health	cancer docroot eto content eto surgery acs surgery surgery treatment cancer role diagnosis staging cancer	0	0	2	3	5	2	7	7	7	6	5	7	0	4	10	14	4	15	13
yalesurgery surgery yale school medicine yale surgery state-of-the-art minimally invasive traditional surgeries ranging outpatient operations organ replacement	health	yalesurgery surgery yale school medicine yale surgery art minimally invasive traditional surgeries ranging outpatient operations organ replacement	0	0	2	3	5	2	0	2	2	6	3	11	6	4	4	0	2	0	4
columbiasurgery divisions surgical gerd laparoscopic surgery gerd laparoscopic surgery treatment gerd fundoplication constructing	health	columbiasurgery divisions surgical gerd laparoscopic surgery gerd laparoscopic surgery treatment gerd fundoplication constructing	0	0	2	3	5	2	0	4	2	6	3	11	0	7	10	10	2	0	4
springer west home medicine surgery surgery journals academic books online media springer buy surgery journals books electronic media online springer academic titles medicine category	health	springer west medicine surgery surgery journals academic books online media springer buy surgery journals books electronic media online springer academic titles medicine category	0	0	2	3	5	2	0	4	2	6	3	10	6	4	10	0	2	0	4
webmd digestive disorders inguinal hernia surgery inguinal hernia- surgery surgery recommended inguinal hernias complications strangulation loop intestine	health	webmd digestive disorders inguinal hernia surgery inguinal hernia surgery surgery recommended inguinal hernias complications strangulation loop intestine	0	0	2	3	5	2	0	7	7	6	11	11	0	4	10	14	5	15	13
medicare gov medicare gov government people medicare gov consumer beneficiary website access information medicare medicare health plans contact information	health	medicare gov medicare gov government people medicare gov consumer beneficiary website access medicare medicare health plans contact	1	0	2	3	5	0	3	4	7	9	5	10	6	4	4	0	15	0	4
adminastar national government services approved durable medical equipment regional carrier administers medicare centers medicare medicaid services	health	adminastar national government services approved durable medical equipment regional carrier administers medicare centers medicare medicaid services	1	0	2	3	5	0	3	4	0	9	5	10	6	4	4	0	15	0	4
medicare gov medicare gov mymedicare gov login welcome medicare secure online service accessing medicare information user mymedicare gov access	health	medicare gov medicare gov mymedicare gov login medicare secure online service accessing medicare user mymedicare gov access	1	0	2	3	5	0	3	4	7	9	5	10	6	4	4	0	15	0	4
kff medicare index medicare health policy public opinion research kaiser collection reports sheets surveys research background material medicare program drug benefit provisions	health	kff medicare medicare health policy public opinion kaiser collection reports sheets surveys background material medicare program drug benefit provisions	1	0	2	3	5	0	3	4	7	9	5	10	6	4	4	0	15	0	4
wrongdiagnosis symptoms diseases diagnosis wrongdiagnosis com medical information symptoms diagnosis misdiagnosis conditions diseases research symptoms symptoms center research	health	wrongdiagnosis symptoms diseases diagnosis wrongdiagnosis medical symptoms diagnosis misdiagnosis conditions diseases symptoms symptoms center	0	0	2	3	5	2	7	7	7	6	3	7	0	3	10	14	5	15	13
familydoctor search symptom familydoctor org search search home conditions women smart patient guide parents kids healthy living seniors otc guide	health	familydoctor search symptom familydoctor org search search conditions women smart patient guide parents kids healthy living seniors otc guide	0	0	2	3	5	2	7	7	7	6	3	7	0	4	4	15	4	14	13
oncologychannel lungcancer diagnosis shtml lung cancer symptoms diagnosis oncologychannel people visit doctor bothered complaints period patients suspected	health	oncologychannel lungcancer diagnosis shtml lung cancer symptoms diagnosis oncologychannel people visit doctor bothered complaints period patients suspected	0	0	2	3	5	2	7	7	7	6	5	7	0	12	10	14	5	15	13
breastcancer symptom breast cancer symptoms diagnosis symptoms diagnosis breast cancer symptoms widely—from lumps swelling skin changes—and breast cancers symptoms	health	breastcancer symptom breast cancer symptoms diagnosis symptoms diagnosis breast cancer symptoms lumps swelling skin breast cancers symptoms	0	0	2	3	5	2	7	7	7	6	5	7	0	12	10	14	4	15	13
nlm nih gov medlineplus osteoarthritis medlineplus osteoarthritis overviews news diagnosis symptoms treatment prevention screening diagnosis symptoms bone x-ray radiography american college radiology	health	nlm nih gov medlineplus osteoarthritis medlineplus osteoarthritis overviews news diagnosis symptoms treatment prevention screening diagnosis symptoms bone ray radiography american college radiology	0	0	2	3	5	2	7	7	7	6	3	7	0	4	10	14	5	15	13
pendulum diagnosis bipolar disorder manic depression diagnosis symptoms diagnosis bipolar symptomatic episode schizophrenia-like symptoms context mania	health	pendulum diagnosis bipolar disorder manic depression diagnosis symptoms diagnosis bipolar symptomatic episode schizophrenia symptoms context mania	0	0	2	3	5	2	7	7	7	6	3	11	0	3	10	14	5	15	13
niapublications adearorder shopdisplayproducts cat diagnosis fsymptoms diagnosis symptoms product quantity column accessibilty keyboard users alt arrow	health	niapublications adearorder shopdisplayproducts cat diagnosis fsymptoms diagnosis symptoms product quantity column accessibilty keyboard users alt arrow	0	0	2	3	5	2	7	7	7	6	3	11	0	3	10	10	5	15	13
medicinenet depression article clinical manic depression causes diagnosis symptoms learn depression signs treatment symptoms diagnosis medications causes statistics manic bipolar postpartum	health	medicinenet depression article clinical manic depression diagnosis symptoms learn depression signs treatment symptoms diagnosis medications statistics manic bipolar postpartum	0	0	2	3	5	2	7	7	7	6	3	11	0	3	10	14	5	15	13
diagnosis symptoms index com diagnosis self diagnosis protocols protocols symptoms recommend consult doctors email live video audio link	health	diagnosis symptoms diagnosis diagnosis protocols protocols symptoms recommend consult doctors email live video audio link	0	0	2	3	5	2	7	7	7	6	5	7	0	3	10	10	5	15	13
arthritis about lupus lupus cause symptoms diagnosis treatment lupus cause symptoms diagnosis treatment lupus cause diagnosis symptoms treatment lupus systemic lupus erythematosus sle autoimmune disease organs	health	arthritis lupus lupus symptoms diagnosis treatment lupus symptoms diagnosis treatment lupus diagnosis symptoms treatment lupus systemic lupus erythematosus sle autoimmune disease organs	0	0	2	3	5	2	7	7	7	6	3	11	0	3	10	14	5	15	13
medical library mddx index online medical diagnosis treatments generates diagnosis patient symptoms treatment options online medical diagnosis assesses symptoms program	health	medical library mddx online medical diagnosis treatments generates diagnosis patient symptoms treatment options online medical diagnosis assesses symptoms program	0	0	2	3	5	2	7	7	7	6	3	7	0	4	10	14	5	15	13
yourdiagnosis online medical diagnosis symptoms analysis symptoms analysis online medical self diagnosis online medical check online health record	health	yourdiagnosis online medical diagnosis symptoms analysis symptoms analysis online medical diagnosis online medical check online health record	0	0	2	3	5	2	7	7	7	6	3	7	0	3	10	14	5	15	13
myelectronicmd online medical diagnosis symptoms medical symptoms disease diagnosis online medical self-screening reliable medical diagnosis health information	health	myelectronicmd online medical diagnosis symptoms medical symptoms disease diagnosis online medical screening reliable medical diagnosis health	0	0	2	3	5	2	7	7	7	6	3	7	0	4	10	14	5	15	13
lamedicare welcome pinnacle medicare services electronic funds transfer standardizations revisions medicare processing manual chapter reference trans pub	health	lamedicare pinnacle medicare services electronic funds transfer standardizations revisions medicare processing manual chapter reference trans pub	1	0	2	3	5	0	3	4	0	9	5	10	6	4	8	0	15	0	4
yourdiseaserisk harvard edu hccpquiz lang english func home quiz heart heart disease heart disease killer women preventable steps risk	health	yourdiseaserisk harvard hccpquiz lang english func quiz heart heart disease heart disease killer women preventable steps risk	0	0	2	3	5	2	7	7	7	6	11	7	0	4	10	14	4	10	13
wikipedia wiki medicare medicare wikipedia encyclopedia medicare publicly-funded health insurance programs retrieved http wikipedia org wiki medicare	health	wikipedia wiki medicare medicare wikipedia encyclopedia medicare publicly funded health insurance programs retrieved http wikipedia org wiki medicare	1	0	2	3	5	0	3	4	0	9	5	10	6	4	8	0	15	0	4
aarp bulletin medicare aarp bulletin medicare stay informed medicare reading aarp bulletin	health	aarp bulletin medicare aarp bulletin medicare stay informed medicare reading aarp bulletin	1	0	2	3	5	0	3	4	7	9	5	10	6	4	4	0	15	0	4
aarp health medicare medicare supplemental insurance discount program drug medicare aarp helps health coverage federal medicare program traditional medicare	health	aarp health medicare medicare supplemental insurance discount program drug medicare aarp helps health coverage federal medicare program traditional medicare	1	0	2	3	5	0	3	4	7	9	5	10	6	4	4	0	15	0	4
medicarerights medicare rights center not-for-profit organization source medicare consumers medicare professionals	health	medicarerights medicare rights center profit organization source medicare consumers medicare professionals	1	0	2	3	5	0	3	4	7	9	5	10	6	4	4	0	15	0	4
plasticsurgery american society plastic surgeons resource plastic searchable database board-certified surgeons patient information photograph gallery	health	plasticsurgery american society plastic surgeons resource plastic searchable database board certified surgeons patient photograph gallery	0	0	2	3	5	2	0	2	2	6	5	11	0	7	10	0	2	12	4
home absurgery default index american board surgery	health	absurgery default american board surgery	0	0	2	3	5	2	0	2	2	6	5	10	0	7	10	0	2	12	4
dir yahoo health medicine surgery surgery medicine yahoo directory yahoo reviewed sites medicine surgery	health	dir yahoo health medicine surgery surgery medicine yahoo directory yahoo reviewed sites medicine surgery	0	0	2	3	5	2	0	7	2	6	3	7	6	4	4	0	2	0	4
answers topic surgery surgery definition answers com sur·ger·y -ies branch medicine deals diagnosis treatment injury deformity disease manual	health	answers topic surgery surgery definition answers ies branch medicine deals diagnosis treatment injury deformity disease manual	0	0	2	3	5	2	0	7	7	6	3	7	0	4	10	14	5	0	13
jci journal clinical investigation web journal clinical investigation access	health	jci journal clinical investigation web journal clinical investigation access	0	0	2	3	5	2	0	4	2	6	3	7	6	4	4	0	2	0	4
centerwatch welcome centerwatch clinical trials listing service designed resource patients research professionals information clinical trials	health	centerwatch centerwatch clinical trials listing service designed resource patients professionals clinical trials	0	0	2	3	5	2	0	7	7	6	3	11	8	4	4	0	15	0	13
clinchem clinical chemistry international journal molecular diagnostics laboratory medicine intructions authors abstracts contacts patient access	health	clinchem clinical chemistry international journal molecular diagnostics laboratory medicine intructions authors abstracts contacts patient access	0	0	2	3	5	2	0	4	2	6	3	7	6	4	4	0	2	0	4
ncbi nlm nih gov entrez query static clinical shtml pubmed clinical queries searches pages clinical research comprehensive searches pubmed	health	ncbi nlm nih gov entrez query static clinical shtml pubmed clinical queries searches clinical comprehensive searches pubmed	0	0	2	3	5	0	0	4	7	6	3	7	0	4	10	0	15	5	15
clinicaltrials gov clinicaltrials gov information clinical trials human clinicaltrials gov patients family health care professionals public access information clinical studies	health	clinicaltrials gov clinicaltrials gov clinical trials human clinicaltrials gov patients family health care professionals public access clinical studies	0	0	2	3	5	2	0	7	7	6	3	7	6	4	4	14	15	0	13
nih gov tpac public health service therapists elcome home page therapist category united public health service multidisciplinary category composed	health	nih gov tpac public health service therapists elcome therapist category united public health service multidisciplinary category composed	0	0	2	3	5	2	0	4	2	6	3	10	6	4	8	0	2	0	4
unitedtherapists unitedtherapists recruitment specialists foreign therapists unitedtherapists foreign therapists physical therapists occupational therapists speech therapists	health	unitedtherapists unitedtherapists recruitment specialists foreign therapists unitedtherapists foreign therapists physical therapists occupational therapists speech therapists	0	0	2	3	5	0	0	4	2	4	3	10	6	3	2	5	2	5	4
hypnosisnetwork therapists therapists published hypnosis network publish audio hypnosis sessions professional therapist topic therapists psy	health	hypnosisnetwork therapists therapists published hypnosis network publish audio hypnosis sessions professional therapist topic therapists psy	0	0	2	3	1	0	0	4	2	10	3	10	6	3	2	5	2	5	4
theartofrelaxation therapists valley massage therapy clinic heather alexis porter therapists valley massage therapy art relaxation kentville nova scotia artwork paintings prints heather alexis	health	theartofrelaxation therapists valley massage therapy clinic heather alexis porter therapists valley massage therapy art relaxation kentville nova scotia artwork paintings prints heather alexis	0	0	2	3	5	2	0	4	2	10	3	5	6	3	2	5	2	5	4
choa default therapists children healthcare atlanta industry academic resources therapists pediastaff links education pediatric therapists	health	choa default therapists children healthcare atlanta industry academic resources therapists pediastaff links education pediatric therapists	0	0	2	3	5	2	0	4	2	6	3	10	6	4	8	0	2	0	4
wikipedia wiki cognitive behavioral therapy cognitive behavioral therapy wikipedia encyclopedia therapy self-fulfilling prophecy cycle efforts therapist client	health	wikipedia wiki cognitive behavioral therapy cognitive behavioral therapy wikipedia encyclopedia therapy fulfilling prophecy cycle efforts therapist client	0	0	2	3	5	0	0	4	2	10	3	10	6	3	8	5	2	5	4
med miami edu ctrada therapists center treatment research adolescent drug denise auffant senior research associate mdft therapist detention community study dtc pinellas county	health	med miami ctrada therapists center treatment adolescent drug denise auffant senior associate mdft therapist detention community study dtc pinellas county	0	0	2	3	5	2	0	4	2	4	3	10	6	3	8	5	2	0	4
amtil therapistmods therapists equine sports massage trained certified schreiber equissage inc int assn equine sports massage therapists	health	amtil therapistmods therapists equine sports massage trained certified schreiber equissage int assn equine sports massage therapists	0	0	2	3	5	2	0	4	2	10	3	5	6	3	2	5	2	5	4
associatedtherapists therapists inc mental health services mental health chemical dependency information counseling families children adolescents social emotional behavior	health	associatedtherapists therapists mental health services mental health chemical dependency counseling families children adolescents social emotional behavior	0	0	2	3	5	2	0	7	2	6	3	10	6	4	8	5	2	0	4
clinicalsocialwork therapists therapists psychotherapists professional mental health psychotherapists professional mental health resources clinical social workers pastoral counselors counselors clinical psychologists	health	clinicalsocialwork therapists therapists psychotherapists professional mental health psychotherapists professional mental health resources clinical social workers pastoral counselors counselors clinical psychologists	0	0	2	3	5	2	0	7	2	6	3	10	6	4	8	5	2	0	4
wikipedia wiki physical therapy physical therapy wikipedia encyclopedia cardiopulmonary physical therapists patients cardiopulmonary physical therapists physical modalities treat people	health	wikipedia wiki physical therapy physical therapy wikipedia encyclopedia cardiopulmonary physical therapists patients cardiopulmonary physical therapists physical modalities treat people	0	0	2	3	5	0	0	4	2	10	3	10	6	3	2	5	2	5	4
camft california association marriage family therapists california association marriage family therapists camft independent professional organization promote profession licensed	health	camft california association marriage family therapists california association marriage family therapists camft independent professional organization promote profession licensed	0	0	2	3	1	2	0	4	2	10	3	10	6	3	2	5	2	5	4
dearpeggy therapists dearpeggy com therapist therapists affairs dearpeggy com	health	dearpeggy therapists dearpeggy therapist therapists affairs dearpeggy	0	0	2	3	5	0	0	4	2	4	3	10	6	3	2	5	2	5	4
nacbt national association cognitive-behavioral therapists nacbt promotes cognitive-behavioral therapy evidence-based practice therapy website information cbt	health	nacbt national association cognitive behavioral therapists nacbt promotes cognitive behavioral therapy evidence based practice therapy website cbt	0	0	2	3	5	0	0	4	2	10	3	10	6	3	8	5	2	5	4
psychiatrist journal clinical psychiatry journal mental health physicians postgraduate press journal clinical psychiatry leading psychiatry publication publications services	health	psychiatrist journal clinical psychiatry journal mental health physicians postgraduate press journal clinical psychiatry leading psychiatry publication publications services	0	0	2	3	5	2	0	4	2	6	3	7	6	4	4	0	2	0	4
bls gov oco ocos physical therapists graduating accredited physical therapist educational program therapists pass licensure exam practice	health	bls gov oco ocos physical therapists graduating accredited physical therapist educational program therapists pass licensure exam practice	0	0	2	3	5	0	0	4	2	4	3	10	6	4	8	5	2	5	4
clinical diabetesjournals clinical diabetes publishes clinical diabetes stanford university libraries highwire press assists publication clinical diabetes online	health	clinical diabetesjournals clinical diabetes publishes clinical diabetes stanford university libraries highwire press assists publication clinical diabetes online	0	0	2	3	5	2	0	4	7	6	3	7	6	4	4	0	2	14	13
cmr asm clinical microbiology reviews clinical microbiology reviews archive cover	health	cmr asm clinical microbiology reviews clinical microbiology reviews archive cover	0	0	2	3	5	2	0	4	7	6	3	7	6	4	4	0	5	5	4
nlm nih gov medlineplus surgery medlineplus surgery people surgery surgery operations relieve pain	health	nlm nih gov medlineplus surgery medlineplus surgery people surgery surgery operations relieve pain	0	0	2	3	5	2	0	7	7	6	3	7	0	4	10	0	5	0	13
onlinesurgery online surgery plastic cosmetic surgery information onlinesurgery com live surgery world internet learn surgery plastic surgery	health	onlinesurgery online surgery plastic cosmetic surgery onlinesurgery live surgery internet learn surgery plastic surgery	0	0	2	3	5	2	0	2	2	6	5	11	0	7	10	10	2	12	4
surgery stanford edu surgery stanford university school medicine welcome home page department surgery stanford university school medicine department dedicated optimal patient	health	surgery stanford surgery stanford university school medicine department surgery stanford university school medicine department dedicated optimal patient	0	0	2	3	5	2	0	4	2	6	3	10	6	4	4	0	2	0	4
wikipedia wiki category surgery category surgery wikipedia encyclopedia category articles surgery surgical procedures surgical procedures surgical specialties	health	wikipedia wiki category surgery category surgery wikipedia encyclopedia category articles surgery surgical procedures surgical procedures surgical specialties	0	0	2	3	5	2	0	4	2	6	3	10	6	4	10	0	2	0	4
wikipedia wiki surgery surgery wikipedia encyclopedia surgery greek χειρουργική hand medical specialty treats diseases injuries operative manual instrumental	health	wikipedia wiki surgery surgery wikipedia encyclopedia surgery greek χειρουργική hand medical specialty treats diseases injuries operative manual instrumental	0	0	2	3	5	2	0	4	2	6	3	7	0	4	10	14	5	0	4
yoursurgery surgery surgical procedures text illustrations photos animation	health	yoursurgery surgery surgical procedures text illustrations photos animation	0	0	2	3	5	2	0	2	2	6	3	10	6	4	10	10	2	12	4
mosby surgery surgery	health	mosby surgery surgery	0	0	2	3	5	2	0	7	2	6	3	11	0	4	10	10	2	0	4
surgery cosmetic plastic surgery breast augmentation reduction liposuction asaps plastic surgeon directory information cosmetic surgery procedures pictures doctors certified	health	surgery cosmetic plastic surgery breast augmentation reduction liposuction asaps plastic surgeon directory cosmetic surgery procedures pictures doctors certified	0	0	2	3	5	2	0	2	2	6	5	11	0	7	10	10	2	12	4
ajcn american journal clinical nutrition publication nutrition topics health news fda regulations legislative events	health	ajcn american journal clinical nutrition publication nutrition topics health news fda regulations legislative events	0	0	2	3	5	2	7	7	7	6	3	7	6	4	4	15	15	14	13
jcm asm journal clinical microbiology publishes research microbiological aspects human animal infections infestations etiologic agents	health	jcm asm journal clinical microbiology publishes microbiological aspects human animal infections infestations etiologic agents	0	0	2	3	5	2	0	4	7	6	3	7	6	4	10	0	5	5	4
interscience wiley jpages clinical anatomy journal applied clinical anatomy	health	interscience wiley jpages clinical anatomy journal applied clinical anatomy	0	0	2	3	5	2	0	4	7	6	11	7	0	4	10	0	5	5	15
journals uchicago edu cid clinical infectious diseases home journal publishes clinical articles microbiology aids commentary sections covering medical legal issues	health	journals uchicago cid clinical infectious diseases journal publishes clinical articles microbiology aids commentary sections covering medical legal issues	0	0	2	3	5	2	0	4	7	6	3	7	6	4	10	0	5	14	13
clinimmsoc clinical immunology society devoted fostering developments science practice clinical immunology information goals meetings job opportunities	health	clinimmsoc clinical immunology society devoted fostering developments science practice clinical immunology goals meetings job opportunities	0	0	2	3	5	2	0	4	2	6	3	7	6	4	4	0	2	0	4
nlm nih gov databases alerts clinical alerts clinical alerts advisories nlm clinical alert notices online clinical alerts expedite release findings nih-funded	health	nlm nih gov databases alerts clinical alerts clinical alerts advisories nlm clinical alert notices online clinical alerts expedite release findings nih funded	0	0	2	3	5	2	0	4	7	6	3	7	0	4	4	14	5	15	15
clinmed netprints clinical medicine netprints web clinical medicine netprints clinical medicine health research netprints warning warning articles posted	health	clinmed netprints clinical medicine netprints web clinical medicine netprints clinical medicine health netprints warning warning articles posted	0	0	2	3	5	2	0	4	7	6	3	7	6	4	4	0	2	0	4
intmed mcw edu clincalc clinical calculator online clinical calculators clinical formulas a-a gradient anion gap body surface body mass index creatinine clearance	health	intmed mcw clincalc clinical calculator online clinical calculators clinical formulas gradient anion gap body surface body mass creatinine clearance	0	0	2	3	5	2	0	4	7	5	10	11	4	10	10	15	5	14	15
clincancerres aacrjournals clinical cancer research journal american association cancer research publishes pre- clinical clinical cancer research studies	health	clincancerres aacrjournals clinical cancer journal american association cancer publishes pre clinical clinical cancer studies	0	0	2	3	5	2	0	4	2	6	3	7	6	12	8	14	2	5	13
cswf clinical social association organizational membership information code ethics legislative updates insurance information publications	health	cswf clinical social association organizational membership code ethics legislative updates insurance publications	1	0	2	1	1	0	0	2	2	1	3	10	6	5	4	0	2	0	4
wikipedia wiki clinical psychology clinical psychology wikipedia encyclopedia clinical psychology scientific study application psychology understanding relieving	health	wikipedia wiki clinical psychology clinical psychology wikipedia encyclopedia clinical psychology scientific study application psychology understanding relieving	0	0	2	3	5	2	0	4	2	5	3	10	6	3	2	0	2	5	4
intl elsevierhealth journals crad clinical radiology clinical radiology published elsevier behalf royal college radiologists view college publications click	health	intl elsevierhealth journals crad clinical radiology clinical radiology published elsevier behalf royal college radiologists view college publications click	0	0	2	3	5	2	0	4	2	6	3	11	6	4	4	0	2	0	4
womenheart women heart disease heart attacks coronary cardiac health national coalition women heart disease information resources cardiac health coronary disease heart	health	womenheart women heart disease heart attacks coronary cardiac health national coalition women heart disease resources cardiac health coronary disease heart	0	0	2	3	5	2	7	7	7	6	11	7	0	4	10	14	4	10	13
journals uchicago edu cid clinical infectious diseases home journal publishes clinical articles microbiology aids commentary sections covering medical legal issues	health	journals uchicago cid clinical infectious diseases journal publishes clinical articles microbiology aids commentary sections covering medical legal issues	0	0	2	3	5	2	0	4	7	6	3	7	6	4	10	0	5	14	13
cdc gov heartdisease dhdsp heart disease home page heart disease leading cause death united cause disability people die heart disease	health	cdc gov heartdisease dhdsp heart disease heart disease leading death united disability people die heart disease	0	0	2	3	5	2	7	7	7	6	11	7	0	4	10	14	4	15	13
modernhealthcare modern healthcare online updated health care industry news features crain communications	health	modernhealthcare modern healthcare online updated health care industry news features crain communications	0	0	2	3	5	6	0	3	2	4	5	10	8	10	8	14	3	1	2
ahca american health care association information american health care association ahca non-profit federation affiliated health organizations	health	ahca american health care association american health care association ahca profit federation affiliated health organizations	0	0	2	3	5	2	0	7	2	4	5	10	6	12	4	15	4	0	4
bayerhealthcare bayer healthcare homepage fairhurst head global marketing animal health division bayer healthcare leverkusen fairhurst	health	bayerhealthcare bayer healthcare homepage fairhurst head global marketing animal health division bayer healthcare leverkusen fairhurst	0	0	2	3	1	2	7	4	2	4	5	10	4	12	8	0	4	0	2
gov health department veterans affairs health care benefits health care benefits services veterans health administration department veterans affairs	health	gov health department veterans affairs health care benefits health care benefits services veterans health administration department veterans affairs	1	0	2	3	5	2	0	7	2	4	3	10	6	14	4	5	2	0	4
webmd cholesterol management webmd cholesterol health center cholesterol information consumer health cholesterol written reviewed doctors	health	webmd cholesterol management webmd cholesterol health center cholesterol consumer health cholesterol written reviewed doctors	0	0	2	3	5	2	7	7	7	5	10	7	0	4	4	14	4	14	13
webmd cholesterol management high cholesterol health tools cholesterol health tools health tools help wise health decisions action health decision focus key medical care decisions	health	webmd cholesterol management cholesterol health tools cholesterol health tools health tools wise health decisions action health decision focus key medical care decisions	0	0	2	3	5	2	7	7	7	5	10	7	6	4	4	15	4	14	13
cholesterol and health cholesterol building block life learn foods cholesterol vitality cholesterol -lowering drugs damage health fascinating roles	health	cholesterol health cholesterol building block life learn foods cholesterol vitality cholesterol lowering drugs damage health fascinating roles	0	0	2	3	5	2	7	7	7	5	10	7	0	10	13	15	4	14	13
reducecholesterol cholesterol health news cholesterol learn health news cholesterol learn stroke blood pressure hyperlipidemia diabetes heart disease medical conditions	health	reducecholesterol cholesterol health news cholesterol learn health news cholesterol learn stroke blood pressure hyperlipidemia diabetes heart disease medical conditions	0	0	2	3	5	2	7	7	7	5	10	7	0	4	13	14	4	14	13
rand research areas health rand research health health care research content health health care policy	health	rand health rand health health care content health health care policy	0	0	2	3	5	2	7	4	7	6	5	10	6	4	4	15	15	0	4
mayoclinic health cholesterol cholesterol center mayoclinic com cholesterol understanding cholesterol affects health medication help cholesterol cholesterol	health	mayoclinic health cholesterol cholesterol center mayoclinic cholesterol understanding cholesterol health medication cholesterol cholesterol	0	0	2	3	5	2	7	7	7	5	10	7	0	4	4	14	4	14	13
bbc health conditions cholesterol shtml bbc health conditions cholesterol cholesterol smooth running bodies cause harm	health	bbc health conditions cholesterol shtml bbc health conditions cholesterol cholesterol smooth running bodies harm	0	0	2	3	5	2	7	7	7	5	10	7	0	4	4	14	4	14	13
health yahoo topic cholesterol cholesterol yahoo health cholesterol finding feedback medical health care fitness advice diagnosis	health	health yahoo topic cholesterol cholesterol yahoo health cholesterol finding feedback medical health care fitness advice diagnosis	0	0	2	3	5	2	7	7	7	5	10	7	6	4	4	15	4	14	13
health discovery centers heart pmg shtml discovery health cholesterol article index learn diagnosing treating cholesterol discovery health cholesterol center	health	health discovery centers heart pmg shtml discovery health cholesterol article learn diagnosing treating cholesterol discovery health cholesterol center	0	0	2	3	5	2	7	7	7	5	10	7	0	4	4	14	4	14	13
hcd bupa fact sheets mosby factsheets cholesterol cholesterol levels causes diet advice bupa health factsheet majority cholesterol body absorbed diet	health	hcd bupa sheets mosby factsheets cholesterol cholesterol levels diet advice bupa health factsheet majority cholesterol body absorbed diet	0	0	2	3	5	2	7	7	7	5	10	2	0	10	13	15	13	10	0
emedicinehealth cholesterol faqs article cholesterol information emedicinehealth com consumer health resource center information dietary information emedicine health	health	emedicinehealth cholesterol faqs article cholesterol emedicinehealth consumer health resource center dietary emedicine health	0	0	2	3	5	2	7	7	7	5	10	7	0	4	4	14	4	14	13
enc online issues enc egg nutrition center articles listed address issues eggs cholesterol health issues food safety	health	enc online issues enc egg nutrition center articles listed address issues eggs cholesterol health issues food safety	0	0	2	3	5	2	7	7	7	5	10	7	6	4	4	15	15	14	13
nhlbi nih gov health public heart chol wyntk nhlbi blood cholesterol information lowering cholesterol lowering risk heart disease write nhlbi health information center box	health	nhlbi nih gov health public heart chol wyntk nhlbi blood cholesterol lowering cholesterol lowering risk heart disease write nhlbi health center box	0	0	2	3	5	2	7	7	7	5	10	7	0	10	13	14	4	14	13
hsph harvard edu nutritionsource fats fats cholesterol nutrition source harvard school public health harvard school public health nutrition research covers information fiber fats calcium carbohydrates eggs nutritional pyramids	health	hsph harvard nutritionsource fats fats cholesterol nutrition source harvard school public health harvard school public health nutrition covers fiber fats calcium carbohydrates eggs nutritional pyramids	0	0	2	3	5	2	7	8	5	4	1	7	7	9	10	5	16	14	11
medicinenet cholesterol focus cholesterol information doctors patients cholesterol information learn ldl cholesterol levels food diet cholesterol health	health	medicinenet cholesterol focus cholesterol doctors patients cholesterol learn ldl cholesterol levels food diet cholesterol health	0	0	2	3	5	2	7	7	7	5	10	7	0	4	4	15	4	14	13
hotjobs yahoo jobs healthcare healthcare jobs yahoo hotjobs search healthcare jobs healthcare job search yahoo hotjobs jobs listed daily	health	hotjobs yahoo jobs healthcare healthcare jobs yahoo hotjobs search healthcare jobs healthcare job search yahoo hotjobs jobs listed daily	0	0	2	3	5	6	0	4	2	4	5	10	6	4	8	0	4	0	18
ahrq gov agency healthcare research quality ahrq home page povides practical health care information research findings data help consumers health providers health insurers researchers policymakers	health	ahrq gov agency healthcare quality ahrq povides practical health care findings data consumers health providers health insurers researchers policymakers	0	0	2	3	5	2	7	7	7	6	5	7	6	10	4	5	4	0	2
healthcarecommission homepage healthcare commission healthcare commission promotes improvement quality nhs independent healthcare	health	healthcarecommission homepage healthcare commission healthcare commission promotes improvement quality nhs independent healthcare	0	0	2	3	1	2	0	4	2	4	5	10	8	11	1	0	15	17	18
gateway ovid ovidweb cgi mode ovid news toc ovft international ophthalmology clinics	health	gateway ovid ovidweb cgi mode ovid news toc ovft international ophthalmology clinics	0	0	1	3	4	3	3	2	7	5	7	4	7	11	10	14	8	12	5
ihr infertility provider infertility clinics fertility clinics fertility doctors infertility clinics fertility clinics fertility doctors fertility treatment vitro fertilization ivf gift zift tet icsi	health	ihr infertility provider infertility clinics fertility clinics fertility doctors infertility clinics fertility clinics fertility doctors fertility treatment vitro fertilization ivf gift zift tet icsi	0	0	2	3	5	2	0	4	7	5	5	2	6	3	8	14	4	0	13
cnn health conditions fertility treatments index study fertility clinics overuse costly lab technique fertility clinics overusing laboratory technique costing infertile couples insurers extra dollars study	health	cnn health conditions fertility treatments study fertility clinics overuse costly lab technique fertility clinics overusing laboratory technique costing infertile couples insurers extra dollars study	0	0	2	3	5	2	0	4	7	5	5	2	6	3	8	14	4	10	13
anesthesiaclinics international anesthesiology clinics home articles information physiology pharmacology agents clinical applications techniques causes complications	health	anesthesiaclinics international anesthesiology clinics articles physiology pharmacology agents clinical applications techniques complications	0	0	2	3	5	2	0	4	7	6	11	7	0	4	10	14	5	15	13
uihealthcare uihospitalsandclinics university iowa hospitals clinics university iowa hospitals clinics --consistently hospitals united states--is iowa comprehensive	health	uihealthcare uihospitalsandclinics university iowa hospitals clinics university iowa hospitals clinics consistently hospitals united iowa comprehensive	0	0	2	3	5	2	0	4	2	6	5	10	6	4	8	0	2	0	4
ccc council community clinics home mission council community clinics community health centers respective efforts access	health	ccc council community clinics mission council community clinics community health centers respective efforts access	0	0	2	3	5	2	0	4	2	5	3	10	6	4	8	0	2	0	4
kumc edu gec prof genecntr clinical genetics centers clinical genetic center clinic web sites contact university medical center web sites clinical genetic services central	health	kumc gec prof genecntr clinical genetics centers clinical genetic center clinic web sites contact university medical center web sites clinical genetic services central	0	0	2	3	5	2	0	4	2	6	3	7	6	4	8	0	2	0	4
scinfo clinics clinics bullet comprehensive sickle cell center grady health system atlanta worlds acute care clinic dedicated patients sickle	health	scinfo clinics clinics bullet comprehensive sickle cell center grady health system atlanta worlds acute care clinic dedicated patients sickle	0	0	2	3	5	2	0	4	2	6	5	10	6	4	8	0	2	0	4
scielo clinics clinics home page clinics print issn publication faculdade medicina usp mission tel clinics hcnet usp	health	scielo clinics clinics clinics print issn publication faculdade medicina usp mission tel clinics hcnet usp	0	0	2	3	5	2	0	4	2	5	5	10	6	4	8	0	2	0	4
hafci haight ashbury clinics inc mission haight ashbury clinics inc hafci access health care health	health	hafci haight ashbury clinics mission haight ashbury clinics hafci access health care health	0	0	2	3	5	2	0	4	2	6	5	10	6	4	8	0	2	0	4
geneclinics gene clinics medical genetics knowledge base nih funded expert-authored descriptions inherited disorders covers genetic testing diagnosis management	health	geneclinics gene clinics medical genetics knowledge base nih funded expert authored descriptions inherited disorders covers genetic testing diagnosis management	0	0	2	3	5	2	0	4	2	6	3	7	0	4	10	14	5	15	15
homedepotclinics home depot clinics workshops home improvement center learn home depot in-store clinics online workshops covering remodeling decorating repair installation	health	homedepotclinics depot clinics workshops improvement center learn depot store clinics online workshops covering remodeling decorating repair installation	0	0	2	3	5	2	0	4	2	5	5	2	0	3	10	12	5	10	13
childrenshc children minnesota wright children community cardiologist children heart clinic excellence family-centered care	health	childrenshc children minnesota wright children community cardiologist children heart clinic excellence family centered care	0	0	2	3	5	2	0	7	2	6	11	7	6	4	8	5	2	10	4
childrensmn children hospitals clinics minnesota pediatric information parenting resources patient services minnesota	health	childrensmn children hospitals clinics minnesota pediatric parenting resources patient services minnesota	0	0	2	3	5	2	0	7	2	6	5	10	6	4	8	0	2	0	4
stanfordhospital home stanford hospital clinics stanford university medical teaching research patient care institution stanford	health	stanfordhospital stanford hospital clinics stanford university medical teaching patient care institution stanford	0	0	2	3	5	2	0	4	2	6	3	10	6	4	4	0	2	0	4
mayo edu mayo clinic medical education research entry information research efforts education programs mayo clinic faculty medical research training	health	mayo mayo clinic medical education entry efforts education programs mayo clinic faculty medical training	0	0	2	3	5	2	0	4	2	6	3	7	6	4	8	0	2	0	4
wikipedia wiki clinic clinic wikipedia encyclopedia clinic outpatient clinic public health facility health care ambulatory patients clients	health	wikipedia wiki clinic clinic wikipedia encyclopedia clinic outpatient clinic public health facility health care ambulatory patients clients	0	0	2	3	5	2	0	4	2	6	3	10	6	4	8	0	2	0	4
theclinics clinics north america expert reviews diagnosis treatment topic	health	theclinics clinics north america expert reviews diagnosis treatment topic	0	0	2	3	5	2	0	7	2	5	3	7	0	3	10	14	5	15	13
gynpages abortion clinics providers abortion clinics online lists international listings abortion clinics websites plus information abortion procedures issues patient instructions aftercare	health	gynpages abortion clinics providers abortion clinics online lists international listings abortion clinics websites abortion procedures issues patient instructions aftercare	0	0	2	3	5	2	0	4	2	6	5	10	6	4	8	0	2	0	4
health discovery centers heart cholesterol cholesterol shtml cholesterol cholesterol discovery health discovery health channel information health wellness topics cholesterol basics cholesterol	health	health discovery centers heart cholesterol cholesterol shtml cholesterol cholesterol discovery health discovery health channel health wellness topics cholesterol basics cholesterol	0	0	2	3	5	2	7	7	7	5	10	7	0	4	4	14	4	14	13
americanheart cholesterol american heart association hdl ldl cholesterol desirable levels personal risk factors treatments	health	americanheart cholesterol american heart association hdl ldl cholesterol desirable levels personal risk factors treatments	0	0	2	3	5	2	7	7	7	5	11	7	0	4	13	14	4	10	13
health msn centers cholesterol articlepage documentid coffee cholesterol msn health fitness cholesterol daily morning jolt boost risk heart disease	health	health msn centers cholesterol articlepage documentid coffee cholesterol msn health fitness cholesterol daily morning jolt boost risk heart disease	0	0	2	3	5	2	7	7	7	5	10	7	0	10	13	15	4	14	13
heart health ivillage cholesterol cholesterol cholesterol diet information ivillage health page information cholesterol diet cholesterol ivillage health page	health	heart health ivillage cholesterol cholesterol cholesterol diet ivillage health cholesterol diet cholesterol ivillage health	0	0	2	3	5	2	7	7	7	5	10	2	0	10	13	15	4	14	0
apha apha american public health association professional association dedicated public health education advocacy	health	apha apha american public health association professional association dedicated public health education advocacy	0	0	2	3	5	2	0	7	2	6	3	10	6	4	8	5	2	0	4
whatispublichealth public health health care matters public health matters graduate degree public health enhance career opportunities	health	whatispublichealth public health health care matters public health matters graduate degree public health enhance career opportunities	0	0	2	3	5	2	0	4	2	4	3	10	6	4	8	5	2	0	4
asph asph education academic public health education graduate national organization accredited schools public health links accredited schools grants funding employment public health	health	asph asph education academic public health education graduate national organization accredited schools public health links accredited schools grants funding employment public health	0	0	2	3	5	2	0	4	2	4	3	10	6	4	8	5	2	0	4
healthweb publichealth healthweb public health public health public health branch medicine prevention control disease disability promotion physical mental health	health	healthweb publichealth healthweb public health public health public health branch medicine prevention control disease disability promotion physical mental health	0	0	2	3	5	2	7	7	7	6	3	7	0	4	8	14	4	0	13
ldb www virtual library public health crisis identity public health ensure conditions people healthy societal	health	ldb virtual library public health crisis identity public health ensure conditions people healthy societal	1	0	2	3	5	2	7	7	7	6	11	7	6	4	4	14	4	0	4
idph state illinois department public health home page protects residents visitors prevention control disease injury regulates medical practitioners promotes	health	idph illinois department public health protects residents visitors prevention control disease injury regulates medical practitioners promotes	0	0	2	3	5	2	0	7	2	6	11	7	6	4	8	14	4	0	4
medicalnewstoday sections public health public health news medical news public health news headlines published daily	health	medicalnewstoday sections public health public health news medical news public health news headlines published daily	0	0	2	3	5	2	7	7	7	6	5	7	6	4	8	14	4	14	13
hsph harvard edu harvard school public health homepage mission school advance public health learning discovery communication massachusetts	health	hsph harvard harvard school public health homepage mission school advance public health learning discovery communication massachusetts	0	0	2	3	5	2	7	4	2	4	3	10	6	4	10	5	2	14	4
mass gov dph massachusetts department public health department public health dedicated mission serve people commonwealth underserved promote	health	mass gov dph massachusetts department public health department public health dedicated mission serve people commonwealth underserved promote	0	0	2	3	5	2	0	7	2	6	3	10	6	4	8	5	2	0	4
intl elsevierhealth journals pubh public health public health monthly international multidisciplinary peer-reviewed journal publishes papers reviews reports aspects	health	intl elsevierhealth journals pubh public health public health monthly international multidisciplinary peer reviewed journal publishes papers reviews reports aspects	0	0	2	3	5	2	0	4	2	6	3	7	6	4	4	0	2	5	4
jhsph edu school public health johns hopkins home school opportunities graduate education research service fields public health intellectual	health	jhsph school public health johns hopkins school opportunities graduate education service fields public health intellectual	0	0	2	3	5	2	0	4	2	4	3	10	6	4	8	5	2	14	4
dph state connecticut department public health home page information press releases news health resources	health	dph connecticut department public health press releases news health resources	0	0	2	3	5	2	7	7	2	6	11	10	6	4	4	5	2	14	4
sph unc edu unc school public health home carolina school public health mission protect public health research teaching practices foster conditions	health	sph unc unc school public health carolina school public health mission protect public health teaching practices foster conditions	0	0	2	3	5	2	0	7	2	4	3	10	6	4	4	5	2	0	4
lapublichealth department public health protects health disease promotes health persons los angeles county	health	lapublichealth department public health protects health disease promotes health persons los angeles county	0	0	2	3	5	2	0	7	2	6	5	7	6	4	8	14	4	14	4
oregon gov dhs oregon public health division people benefiting public health public health lives	health	oregon gov dhs oregon public health division people benefiting public health public health lives	0	0	2	3	5	2	7	7	7	4	11	10	6	12	4	5	4	14	13
idph state iowa department public health iowa department public health internet home page	health	idph iowa department public health iowa department public health internet	0	0	2	3	5	2	0	4	2	6	11	10	6	4	8	0	2	0	4
sph umich edu university michigan school public health degree programs public health master public health mph mph doctor medicine mph	health	sph umich university michigan school public health degree programs public health master public health mph mph doctor medicine mph	0	0	2	3	5	2	0	7	2	4	3	10	6	4	8	5	2	0	4
metrokc gov health welcome public health seattle king county comprehensive portal website featuring applicable sheets public health topics public health topics services	health	metrokc gov health public health seattle king county comprehensive portal website featuring applicable sheets public health topics public health topics services	0	0	2	3	5	2	7	7	2	6	5	7	6	4	8	14	4	14	4
atsdr cdc gov gis atsdr gis public health information gis public health applications conference	health	atsdr cdc gov gis atsdr gis public health gis public health applications conference	0	0	2	3	5	2	7	7	7	6	11	7	0	4	8	14	4	15	13
wikipedia wiki public health public health wikipedia encyclopedia public health threats health community population health analysis health promoted	health	wikipedia wiki public health public health wikipedia encyclopedia public health threats health community population health analysis health promoted	0	0	2	3	5	2	0	7	7	6	3	7	6	4	8	14	2	14	13
cdc gov travel travel clinics travel clinics cdc travelers health government health recommendations traveling centers disease control prevention cdc	health	cdc gov travel travel clinics travel clinics cdc travelers health government health recommendations traveling centers disease control prevention cdc	0	0	2	3	5	2	7	7	7	6	5	7	0	4	8	14	4	15	13
mdjunction forums dual diagnosis discussions general support dual diagnosis doctor dual diagnosis doctor dual diagnosis forums hello forum dual diagnosis diagnosed dual diagnosed doc agrees drinking	health	mdjunction forums dual diagnosis discussions support dual diagnosis doctor dual diagnosis doctor dual diagnosis forums forum dual diagnosis diagnosed dual diagnosed doc agrees drinking	0	0	2	3	5	2	7	7	7	6	5	11	0	3	10	14	5	15	13
searchvb techtarget infocenter asktheexpertsanswer gci tax iid guidance remote doctor patient diagnosis system doctor diagnosis prescription transmitted client fashion tweak scenario	health	searchvb techtarget infocenter asktheexpertsanswer gci tax iid guidance remote doctor patient diagnosis system doctor diagnosis prescription transmitted client fashion tweak scenario	0	0	2	3	5	2	0	4	7	6	3	11	0	3	10	5	5	15	15
revolutionhealth conditions heart high cholesterol cholesterol revolution health revolution health trusted source cholesterol information covering symptoms causes risks treatments discuss cholesterol	health	revolutionhealth conditions heart cholesterol cholesterol revolution health revolution health trusted source cholesterol covering symptoms risks treatments cholesterol	0	0	2	3	5	2	7	7	7	5	11	7	0	4	10	14	4	10	13
vitabase supplements cholesterol default cholesterol products yeast rice policosanol vitabase vitabase products cholesterol yeast rice policosanol vitabase health information supplements	health	vitabase supplements cholesterol default cholesterol products yeast rice policosanol vitabase vitabase products cholesterol yeast rice policosanol vitabase health supplements	0	0	2	3	5	2	7	7	7	5	10	7	0	4	4	15	4	14	13
familydoctor search symptom familydoctor org family doctor web reviews drug information search symptom bmi calculator search symptom print printer-friendly version	health	familydoctor search symptom familydoctor org family doctor web reviews drug search symptom bmi calculator search symptom print printer friendly version	0	0	2	3	5	2	7	7	7	6	3	7	0	4	4	15	4	14	13
yourdiagnosis online medical diagnosis symptoms analysis symptoms analysis online medical self diagnosis online medical check print report doctor visit	health	yourdiagnosis online medical diagnosis symptoms analysis symptoms analysis online medical diagnosis online medical check print report doctor visit	0	0	2	3	5	2	7	7	7	6	3	7	0	3	10	14	5	15	13
seattletimes nwsource health sickintro seattle health hidden business hidden business doctor diagnosis kelleher duff seattle staff reporters	health	seattletimes nwsource health sickintro seattle health hidden business hidden business doctor diagnosis kelleher duff seattle staff reporters	0	0	2	3	5	2	0	8	2	6	5	11	11	14	8	14	4	15	18
usatoday community utils idmap story nfl disputes doctor diagnosis footballer dementia bennet omalu iron mike webster body pro football hall famer table coroner office pittsburgh	health	usatoday community utils idmap story nfl disputes doctor diagnosis footballer dementia bennet omalu iron mike webster body pro football hall famer table coroner office pittsburgh	0	1	0	2	4	6	1	8	1	3	5	0	9	12	2	10	0	10	18
medsource consults online diagnosis doctor online diagnosis doctor online pharmacy specialize chronic pain medication licensed doctors pharmacy medications prescribed	health	medsource consults online diagnosis doctor online diagnosis doctor online pharmacy specialize chronic pain medication licensed doctors pharmacy medications prescribed	0	0	2	3	5	2	0	7	7	6	3	11	8	4	4	15	5	0	13
pioneerlocal secondop article doctor diagnosis pioneer press pioneer doctor diagnosis insight complicated diagnosis explore treatment	health	pioneerlocal secondop article doctor diagnosis pioneer press pioneer doctor diagnosis insight complicated diagnosis explore treatment	0	0	2	3	5	2	7	7	7	6	5	7	0	3	10	14	5	15	13
flowgo funny the doctors diagnosis doctor diagnosis flowgo doctor diagnosis hilarious joke life threatening disease wife	health	flowgo funny doctors diagnosis doctor diagnosis flowgo doctor diagnosis hilarious joke life threatening disease wife	0	0	2	3	5	2	0	7	7	6	5	0	0	3	10	10	5	15	13
amazon golf doctor diagnosis explanation correction amazon com golf doctor diagnosis explanation correction amazon com golf doctor diagnosis explanation correction golfing faults books jacobs dick aultman jacobs dick aultman	health	amazon golf doctor diagnosis explanation correction amazon golf doctor diagnosis explanation correction amazon golf doctor diagnosis explanation correction golfing faults books jacobs dick aultman jacobs dick aultman	0	1	0	2	4	6	0	8	1	10	3	0	9	3	2	10	0	1	18
school familyeducation add and adhd medical examination adhd teacher doctor diagnosis familyeducation com teacher diagnosis suggestion attention-span doctor	health	school familyeducation add adhd medical examination adhd teacher doctor diagnosis familyeducation teacher diagnosis suggestion attention span doctor	0	0	2	3	5	2	0	7	7	10	5	0	0	3	10	5	4	15	18
cnn world americas castro health index spanish doctor examines castro diagnosis undisclosed cnn com spanish surgeon traveled havana steps halt deterioration cuban president fidel castro health	health	cnn americas castro health spanish doctor examines castro diagnosis undisclosed cnn spanish surgeon traveled havana steps halt deterioration cuban president fidel castro health	0	0	2	2	2	2	2	4	0	5	5	0	11	14	1	7	4	4	17
webmd webmd information health doctor friends ads heard news webmd medical advice diagnosis treatment	health	webmd webmd health doctor friends ads heard news webmd medical advice diagnosis treatment	0	0	2	3	5	2	7	7	7	6	5	7	0	4	10	14	4	15	13
findarticles articles louisiana swamp doctor diagnosis romantic fatality louisiana swamp doctors diagnosis romantic fatality frontier roots realism critical essay southern literary journal	health	findarticles articles louisiana swamp doctor diagnosis romantic fatality louisiana swamp doctors diagnosis romantic fatality frontier roots realism critical essay southern literary journal	0	0	2	2	5	2	0	4	2	10	3	11	0	3	10	10	5	0	4
newsdaily topnews upi wrongfulbirth newsdaily topnews doctor botched baby diagnosis doctor botched baby diagnosis tampa fla upi florida couple awarded doctor failing	health	newsdaily topnews upi wrongfulbirth newsdaily topnews doctor botched baby diagnosis doctor botched baby diagnosis tampa fla upi florida couple awarded doctor failing	0	0	2	2	4	6	0	8	2	10	5	0	0	3	2	10	5	1	18
ije oxfordjournals cgi reprint doctor diagnosis maternal recall respiratory illness leeder sittampalam wever wiggins doctor diagnosis ship diagnosis doctor respiratory illnesses	health	ije oxfordjournals cgi reprint doctor diagnosis maternal recall respiratory illness leeder sittampalam wever wiggins doctor diagnosis ship diagnosis doctor respiratory illnesses	0	0	2	3	5	2	0	7	7	6	3	11	0	3	10	15	5	1	4
ije oxfordjournals cgi content abstract doctor diagnosis maternal recall respiratory illness poor relationship doctor diagnosis maternal recall illnesses children reported mothers	health	ije oxfordjournals cgi content abstract doctor diagnosis maternal recall respiratory illness poor relationship doctor diagnosis maternal recall illnesses children reported mothers	0	0	2	3	5	2	0	7	7	6	3	11	0	3	10	15	5	1	4
zwire news newsid brd pag dept rfi houston community newspapers online doctor diagnosis hiv aids pioneer disease teen girls seniors	health	zwire news newsid brd pag dept rfi houston community newspapers online doctor diagnosis hiv aids pioneer disease teen girls seniors	0	0	2	3	5	2	7	7	7	6	11	7	0	4	10	14	5	15	15
seniorjournal news eldercare afterdiagnosishelp guide actions doctor diagnosis illness publication helpful senior citizens caregivers online advice information	health	seniorjournal news eldercare afterdiagnosishelp guide actions doctor diagnosis illness publication helpful senior citizens caregivers online advice	0	0	2	3	5	2	0	4	7	6	5	7	0	3	4	15	5	0	4
bbc health talking your doctor diagnosis shtml bbc health talking doctor diagnosis rob hicks doctors diagnosis	health	bbc health talking doctor diagnosis shtml bbc health talking doctor diagnosis rob hicks doctors diagnosis	0	0	2	3	5	2	7	7	7	6	5	7	0	4	10	14	4	15	13
wikipedia wiki disease disease wikipedia encyclopedia disease abnormal condition organism impairs bodily functions human disease	health	wikipedia wiki disease disease wikipedia encyclopedia disease abnormal condition organism impairs bodily functions human disease	0	0	2	3	5	2	7	7	7	6	11	7	0	4	10	14	5	0	13
cdc gov centers disease control prevention promotes health quality life controlling disease injury disability	health	cdc gov centers disease control prevention promotes health quality life controlling disease injury disability	0	0	2	3	5	2	7	7	7	6	11	7	0	4	8	14	4	15	13
cdc gov cdc index listing disease health topics center disease control prevention united	health	cdc gov cdc listing disease health topics center disease control prevention united	0	0	2	3	5	2	7	7	7	6	11	7	0	4	10	14	5	15	13
amazon therapy david lodge amazon com therapy books lodge amazon com therapy books lodge lodge	health	amazon therapy david lodge amazon therapy books lodge amazon therapy books lodge lodge	0	0	2	2	3	0	0	8	9	10	3	0	9	3	2	5	3	5	19
tdi dog therapy dogs international inc national registrar qualified handlers therapy dogs visits training testing programs	health	tdi dog therapy dogs international national registrar qualified handlers therapy dogs visits training testing programs	0	0	2	3	1	0	0	4	2	10	3	11	6	3	2	0	2	5	4
apartmenttherapy apartment therapy york tufenkian carpet outlet buy carpets tibet armenia hampton art therapy paintings sale	health	apartmenttherapy apartment therapy york tufenkian carpet outlet buy carpets tibet armenia hampton art therapy paintings sale	0	0	2	2	3	1	0	8	2	0	10	5	9	3	2	5	3	5	9
aamft american association marriage family therapy professionally developed resources practitioners consumers marriage family therapy search engine finding qualified	health	aamft american association marriage family therapy professionally developed resources practitioners consumers marriage family therapy search engine finding qualified	0	0	2	3	1	2	0	4	2	10	3	10	6	3	2	5	2	5	4
therapyquestionmark therapy therapyquestionmark rock band therapy news tour band diary discography audio video downloads	health	therapyquestionmark therapy therapyquestionmark rock band therapy news tour band diary discography audio video downloads	0	1	0	2	4	5	1	8	2	10	7	0	6	3	2	12	3	5	6
therapy nyc therapy lounge music food events therapy york city gay bar york gay bar nyc gay bar gay bar bar gay lounge restaurant hot guys lounge food tom dempsey	health	therapy nyc therapy lounge music food events therapy york city gay bar york gay bar nyc gay bar gay bar bar gay lounge restaurant hot guys lounge food tom dempsey	0	1	0	2	3	1	1	8	2	0	6	1	13	14	2	5	3	5	19
therapists psychologytoday psychology therapy directory personal profiles specialties search city zip code	health	therapists psychologytoday psychology therapy directory personal profiles specialties search city zip code	0	0	2	3	5	0	0	4	2	4	3	10	6	3	2	0	2	5	4
wikipedia wiki therapy therapy wikipedia encyclopedia therapy greek θεραπεία remediation health therapy contexts	health	wikipedia wiki therapy therapy wikipedia encyclopedia therapy greek θεραπεία remediation health therapy contexts	0	0	2	3	5	0	0	4	2	10	3	10	6	3	2	5	2	5	4
pharmacy wsu edu college pharmacy washington university college professional pharmacy programs prepare students lifetime responsible service pharmaceutical profession careers	health	pharmacy wsu college pharmacy washington university college professional pharmacy programs prepare students lifetime responsible service pharmaceutical profession careers	0	0	2	3	5	2	0	7	2	4	3	11	6	4	8	5	2	0	4
pharmacy unc edu home unc school pharmacy school pharmacy chapel hill pharm degree pharmaceutical sciences joint professional degrees	health	pharmacy unc unc school pharmacy school pharmacy chapel hill pharm degree pharmaceutical sciences joint professional degrees	0	0	2	3	5	2	0	7	2	4	3	11	6	4	4	5	2	0	4
pharmacy oregonstate edu pharmacy college pharmacy college pharmacy trains tomorrow practitioners researchers dynamic field pharmacy pharmacists conduit	health	pharmacy oregonstate pharmacy college pharmacy college pharmacy trains tomorrow practitioners researchers dynamic field pharmacy pharmacists conduit	0	0	2	3	5	2	0	7	2	4	3	11	6	4	8	5	2	0	4
umich edu pharmacy university michigan college pharmacy pharmacy education programs university michigan	health	umich pharmacy university michigan college pharmacy pharmacy education programs university michigan	0	0	2	3	5	2	0	7	2	4	3	11	6	4	8	5	2	0	4
sciencedaily mediwire pharmacy sciencedaily com pharmacy center articles cover industry peer reviewed articles pharmacist news releases regarding practice science pharmacy drug stores	health	sciencedaily mediwire pharmacy sciencedaily pharmacy center articles cover industry peer reviewed articles pharmacist news releases practice science pharmacy drug stores	0	0	2	3	5	2	0	7	2	6	3	11	6	4	4	15	2	0	4
google top health pharmacy google directory health pharmacy acpe-approved education publisher annals pharmacotherapy journal pharmacy technology	health	google top health pharmacy google directory health pharmacy acpe approved education publisher annals pharmacotherapy journal pharmacy technology	0	0	2	3	5	2	0	7	2	6	3	7	6	4	4	15	2	0	4
tricare osd mil pharmacy tricare pharmacy	health	tricare osd mil pharmacy tricare pharmacy	0	0	2	3	5	2	0	5	2	4	3	11	6	4	8	5	11	0	4
dmoz health pharmacy directory health pharmacy argus health systems inc pharmacy information technology value-added administration processing learn argus products	health	dmoz health pharmacy directory health pharmacy argus health systems pharmacy technology administration processing learn argus products	0	0	2	3	5	2	0	7	2	4	3	11	6	4	4	15	2	0	4
drugstore drugstore com online pharmacy prescription drugs health drugstore world products expertise help health beauty wellness personal care pharmacy	health	drugstore drugstore online pharmacy prescription drugs health drugstore products expertise health beauty wellness personal care pharmacy	0	0	2	3	5	2	0	7	2	4	3	7	6	10	4	15	2	0	2
riteaid rite aid pharmacy personal rite aid corporation nation leading drugstore chains modern store base brand modern distribution centers	health	riteaid rite aid pharmacy personal rite aid corporation nation leading drugstore chains modern store base brand modern distribution centers	0	0	2	3	5	2	0	5	2	4	3	1	8	10	5	15	5	1	2
pharmacy sourceforge pharmacy cvs front-end pharmacy gnome compliant front-end cvs operating systems linux freebsd user	health	pharmacy sourceforge pharmacy cvs front pharmacy gnome compliant front cvs operating systems linux freebsd user	0	0	2	3	5	2	0	7	2	4	3	11	6	7	5	15	2	0	2
apta american physical therapy association apta national professional organization research physical therapy news consumer information career advice access issues	health	apta american physical therapy association apta national professional organization physical therapy news consumer career advice access issues	0	0	2	3	5	0	0	4	2	6	3	10	6	4	4	0	2	5	4
pharmacytimes pharmacy practical information pharmacist pharmacytimes com practical information todays pharmacist	health	pharmacytimes pharmacy practical pharmacist pharmacytimes practical todays pharmacist	0	0	2	3	5	2	0	7	2	6	3	11	6	10	4	5	2	0	2
nature gene therapy publishes research genetic cell-based technologies treat disease	health	nature gene therapy publishes genetic cell based technologies treat disease	0	0	2	3	5	2	0	4	2	6	3	7	6	4	8	14	2	5	4
amazon therapy alex delaware jonathan kellerman amazon com therapy alex delaware books jonathan kellerman amazon com therapy alex delaware books jonathan kellerman jonathan kellerman	health	amazon therapy alex delaware jonathan kellerman amazon therapy alex delaware books jonathan kellerman amazon therapy alex delaware books jonathan kellerman jonathan kellerman	0	1	0	2	3	0	0	8	9	10	3	5	9	3	2	5	3	5	19
mayoclinic health heart disease heart disease center mayoclinic com heart disease center comprehensive source heart disease heart tests heart disease prevention	health	mayoclinic health heart disease heart disease center mayoclinic heart disease center comprehensive source heart disease heart tests heart disease prevention	0	0	2	3	5	2	7	7	7	6	11	7	0	4	10	14	4	15	13
topics nytimes top news health diseasesconditionsandhealthtopics heartdisease index inline nyt classifier heart disease health news york articles multimedia heart disease coronary disease arteries angiograms angina articles heart disease york	health	topics nytimes top news health diseasesconditionsandhealthtopics heartdisease inline nyt classifier heart disease health news york articles multimedia heart disease coronary disease arteries angiograms angina articles heart disease york	0	0	2	3	5	2	7	7	7	5	11	7	0	4	10	14	4	14	13
sciencedaily news health medicine heart disease sciencedaily heart disease news learn recognize signs symptoms stroke congestive heart disease medical research risk factors causes prevention	health	sciencedaily news health medicine heart disease sciencedaily heart disease news learn recognize signs symptoms stroke congestive heart disease medical risk factors prevention	0	0	2	3	5	2	7	7	7	6	11	7	0	4	10	14	4	15	13
cdc gov nchs fastats heart fastats heart disease noninstitutionalized adults diagnosed heart disease patients heart disease diagnosis	health	cdc gov nchs fastats heart fastats heart disease noninstitutionalized adults diagnosed heart disease patients heart disease diagnosis	0	0	2	3	5	2	7	7	7	6	11	7	0	4	10	14	4	15	13
heartdisease about heart disease cardiology home page exploring information heart disease cardiology	health	heartdisease heart disease cardiology exploring heart disease cardiology	0	0	2	3	5	2	7	7	7	6	11	7	0	4	10	14	4	15	13
webmd heart webmd heart health center heart condition information heart disease drugs tips information heart disease campaign teach women heart disease isn	health	webmd heart webmd heart health center heart condition heart disease drugs tips heart disease campaign teach women heart disease isn	0	0	2	3	5	2	7	7	7	6	11	7	0	4	10	14	4	14	13
wikipedia wiki heart disease heart disease wikipedia encyclopedia heart disease umbrella diseases affect heart leading cause death united	health	wikipedia wiki heart disease heart disease wikipedia encyclopedia heart disease umbrella diseases affect heart leading death united	0	0	2	3	5	2	7	7	7	6	11	7	0	4	10	14	5	15	13
nlm nih gov medlineplus ency article medlineplus medical encyclopedia heart disease heart disease disorder affects heart function heart disease	health	nlm nih gov medlineplus ency article medlineplus medical encyclopedia heart disease heart disease disorder heart function heart disease	0	0	2	3	5	2	7	7	7	6	11	7	0	4	10	14	5	15	13
nlm nih gov medlineplus heartdiseases medlineplus heart diseases heart disease killer cause cause heart disease narrowing blockage	health	nlm nih gov medlineplus heartdiseases medlineplus heart diseases heart disease killer heart disease narrowing blockage	0	0	2	3	5	2	7	7	7	6	11	7	0	4	10	14	5	15	13
women gov faq heartdis heart disease heart disease abnormal conditions affecting heart blood vessels heart heart disease	health	women gov faq heartdis heart disease heart disease abnormal conditions heart blood vessels heart heart disease	0	0	2	3	5	2	7	7	7	6	11	7	0	4	10	14	4	10	13
americanheart american heart association information education heart stroke disease	health	americanheart american heart association education heart stroke disease	0	0	2	3	5	2	7	7	7	6	11	7	0	4	13	14	4	10	13
nature cgt cancer gene therapy international society cancer gene therapy resource publishes research hosts views	health	nature cgt cancer gene therapy international society cancer gene therapy resource publishes hosts views	0	0	2	3	5	2	0	4	2	6	3	7	6	4	8	14	2	5	4
musictherapy welcome american music therapy association website advance public awareness benefits music therapy access quality music therapy services world	health	musictherapy american music therapy association website advance public awareness benefits music therapy access quality music therapy services	0	0	2	3	5	2	0	4	2	10	3	10	6	14	2	5	2	5	4
aota american occupational therapy association	health	aota american occupational therapy association	0	0	2	3	5	0	0	4	2	4	3	10	6	3	8	5	2	5	4
therapydogs therapy dogs inc national registrar helps dog owners pets therapy qualifications therapy dogs safe visit	health	therapydogs therapy dogs national registrar helps dog owners pets therapy qualifications therapy dogs safe visit	0	0	2	3	1	0	0	4	2	10	3	11	6	3	2	0	2	5	4
ptjournal physical therapy peer-reviewed physical therapy journal journal american physical therapy association	health	ptjournal physical therapy peer reviewed physical therapy journal journal american physical therapy association	0	0	2	3	5	0	0	4	2	10	3	10	6	3	2	0	2	5	4
ornl gov sci techresources human genome medicine genetherapy shtml gene therapy definition hurdles ethical issues links resources gene therapy oak ridge national laboratory	health	ornl gov sci techresources human genome medicine genetherapy shtml gene therapy definition hurdles ethical issues links resources gene therapy oak ridge national laboratory	0	0	2	3	5	2	0	4	2	6	3	11	6	4	8	14	2	5	4
aabt abct association behavioral cognitive therapies abct ceu cme educational opportunities journals research clinical practice cbt referrals	health	aabt abct association behavioral cognitive therapies abct ceu cme educational opportunities journals clinical practice cbt referrals	0	0	2	3	1	6	0	4	2	3	3	1	6	3	4	7	2	4	17
coloringtherapy coloring therapy home coloring therapy experience benefits coloring self help therapy stress promotes wellness inner development plus fun	health	coloringtherapy coloring therapy coloring therapy experience benefits coloring therapy stress promotes wellness development fun	0	0	2	3	5	2	0	4	2	5	10	5	6	14	2	5	13	5	4
yelp biz hdo lolvsj therapy san francisco mission yelp therapy reviews favorite stores nission candystore buying girls super	health	yelp biz hdo lolvsj therapy san francisco mission yelp therapy reviews favorite stores nission candystore buying girls super	0	0	0	2	3	1	1	8	2	0	6	0	6	3	2	12	3	5	9
heartdisease heart disease superko screening tests individualized programs outlined book treat heart disease	health	heartdisease heart disease superko screening tests individualized programs outlined book treat heart disease	0	0	2	3	5	2	7	7	7	6	11	7	0	4	10	14	4	15	13
walmart pharmacy pharmacy wal-mart wal-mart pharmacy save refill prescriptions online pick wal-mart store	health	walmart pharmacy pharmacy wal mart wal mart pharmacy save refill prescriptions online pick wal mart store	0	0	2	3	5	2	0	7	2	4	3	11	6	10	5	15	2	0	2
cvs cvs pharmacy online version retail chain prescriptions health personal care gift items online health news information	health	cvs cvs pharmacy online version retail chain prescriptions health personal care gift items online health news	0	0	2	3	5	2	0	7	2	4	3	7	6	10	4	15	2	0	2
nutrition gov nutrition gov homepage nutrition health issues dietary supplements food assistance programs nutrition gov service national agricultural library united	health	nutrition gov nutrition gov homepage nutrition health issues dietary supplements food assistance programs nutrition gov service national agricultural library united	0	0	2	3	5	2	7	7	7	6	10	7	6	4	4	15	15	14	13
who int nutrition nutrition nutrition input foundation health development nutrition stronger immune systems illness health	health	int nutrition nutrition nutrition input foundation health development nutrition stronger immune systems illness health	0	0	2	3	5	2	7	7	7	6	10	7	6	4	4	15	15	14	13
nlm nih gov medlineplus thyroiddiseases medlineplus thyroid diseases millions people thyroid diseases women thyroid disease body energy	health	nlm nih gov medlineplus thyroiddiseases medlineplus thyroid diseases millions people thyroid diseases women thyroid disease body energy	0	0	2	3	5	2	7	4	7	6	11	7	0	4	10	14	5	14	13
journals uchicago edu jid journal infectious diseases home research pathogenesis diagnosis treatment infectious diseases microbes cause disorders host immune	health	journals uchicago jid journal infectious diseases pathogenesis diagnosis treatment infectious diseases microbes disorders host immune	0	0	2	3	5	2	0	4	7	6	3	7	0	4	10	14	5	5	13
medicinenet headache article headache causes symptoms diagnosis treatment medicinenet com learn headaches migraine tension cluster menstrual spinal headaches causes symptoms diagnosis	health	medicinenet headache article headache symptoms diagnosis treatment medicinenet learn headaches migraine tension cluster menstrual spinal headaches symptoms diagnosis	0	0	2	3	5	2	7	7	7	6	3	11	0	3	10	14	5	15	13
endocrine niddk nih gov pubs addison addison addison disease addison disease endocrine hormonal disorder age afflicts women disease characterized	health	endocrine niddk nih gov pubs addison addison addison disease addison disease endocrine hormonal disorder age afflicts women disease characterized	0	0	2	3	5	2	7	7	7	6	11	7	0	4	10	14	5	15	13
yourdiseaserisk harvard edu disease risk welcome disease risk source prevention risk developing diseases united	health	yourdiseaserisk harvard disease risk disease risk source prevention risk developing diseases united	0	0	2	3	5	2	7	7	7	6	11	7	0	4	10	14	4	14	13
alz alzheimer disease international umbrella organisation national alzheimer associations world	health	alz alzheimer disease international umbrella organisation national alzheimer associations	0	0	2	3	5	2	7	7	7	6	11	7	0	12	10	14	5	15	13
pdf parkinson disease foundation inc home parkinson disease foundation leading national presence parkinson disease research patient education public advocacy	health	pdf parkinson disease foundation parkinson disease foundation leading national presence parkinson disease patient education public advocacy	0	0	2	3	5	2	7	7	7	6	11	7	8	4	8	14	5	0	13
digestive niddk nih gov ddiseases pubs crohns index crohn disease information national institutes health crohn disease symptoms treatment	health	digestive niddk nih gov ddiseases pubs crohns crohn disease national institutes health crohn disease symptoms treatment	0	0	2	3	5	2	7	7	7	6	11	7	0	4	10	14	5	15	13
ncbi nlm nih gov books fcgi rid gnd preface preface genes disease introduction relationship genetic factors human disease summary genetic diseases links	health	ncbi nlm nih gov books fcgi rid gnd preface preface genes disease introduction relationship genetic factors human disease summary genetic diseases links	0	0	2	3	5	2	0	7	7	6	3	7	0	4	10	14	5	15	15
diseasesdatabase diseases database ver medical lists links diseases database cross-referenced medical dictionary diseases medications symptoms signs investigations links disease web pages databases medical search	health	diseasesdatabase diseases database ver medical lists links diseases database cross referenced medical dictionary diseases medications symptoms signs investigations links disease web databases medical search	0	0	2	3	5	2	7	7	7	6	3	7	0	4	4	14	5	0	13
ncbi nlm nih gov disease genes disease genes disease descriptions inherited disorders hosted national center biotechnology information ncbi	health	ncbi nlm nih gov disease genes disease genes disease descriptions inherited disorders hosted national center biotechnology ncbi	0	0	2	3	5	2	0	7	7	6	3	7	0	4	10	14	5	15	15
neuro wustl edu neuromuscular neuromuscular disease center review muscle nerve neuromuscular disorders links sites	health	neuro wustl neuromuscular neuromuscular disease center review muscle nerve neuromuscular disorders links sites	0	0	2	3	5	2	7	7	7	6	10	11	8	4	4	15	2	14	19
cancerweb ncl cgi bin omd disease disease online medical dictionary diseases desperate grown desperate appliances relieved shak instability injustice confusion public counsels	health	cancerweb ncl cgi bin omd disease disease online medical dictionary diseases desperate grown desperate appliances relieved shak instability injustice confusion public counsels	0	0	2	3	5	2	0	7	7	6	3	0	0	3	10	10	5	0	15
designdisease design disease feel symptoms design disease cost-effective web design services focused usability accessibility web standards	health	designdisease design disease feel symptoms design disease cost effective web design services focused usability accessibility web standards	0	0	2	3	5	2	0	7	2	6	5	11	8	4	10	14	4	0	13
who int csr don disease outbreak news information disease outbreaks world searchable period archives disease communicable disease surveillance	health	int csr don disease outbreak news disease outbreaks searchable period archives disease communicable disease surveillance	0	0	2	3	5	2	0	7	7	6	11	7	0	4	10	14	5	15	15
mic diseases index diseases disorders karolinska institutet stockholm sweden comprehensive listings links medical information reliable	health	mic diseases diseases disorders karolinska institutet stockholm sweden comprehensive listings links medical reliable	0	0	2	3	5	2	7	7	7	6	3	7	0	4	4	14	5	0	13
dir yahoo health diseases and conditions diseases conditions yahoo directory discover symptoms treatment options physical mental illnesses afflict	health	dir yahoo health diseases conditions diseases conditions yahoo directory discover symptoms treatment options physical mental illnesses afflict	0	0	2	3	5	2	7	7	7	6	3	7	0	4	4	14	4	14	13
eatright american dietetic association ada serves public promoting optimal nutrition health ada nation food nutrition experts translating	health	eatright american dietetic association ada serves public promoting optimal nutrition health ada nation food nutrition experts translating	0	0	2	3	5	2	7	7	7	6	3	7	6	4	4	15	15	14	4
bls gov oco ocos pharmacists pharmacists oversee pharmacy students serving interns pharmacists pursuing nontraditional pharmacy	health	bls gov oco ocos pharmacists pharmacists oversee pharmacy students serving interns pharmacists pursuing nontraditional pharmacy	0	0	2	3	5	2	0	7	2	4	3	11	6	4	8	5	2	0	4
hsph harvard edu nutritionsource nutrition source harvard school public health harvard school public health nutrition research covers information fiber fats calcium carbohydrates eggs nutritional pyramids	health	hsph harvard nutritionsource nutrition source harvard school public health harvard school public health nutrition covers fiber fats calcium carbohydrates eggs nutritional pyramids	0	0	2	3	5	2	7	8	5	4	1	7	7	9	10	5	16	14	11
health heart nutrition health heart disease cause prevention heart disease non-profit tips foods vitamins heart disease prevention heart health heart disease	health	health heart nutrition health heart disease prevention heart disease profit tips foods vitamins heart disease prevention heart health heart disease	0	0	2	3	5	2	7	7	7	6	11	7	0	4	10	14	4	14	13
aacp american association colleges pharmacy aacp national organization pharmaceutical education educators	health	aacp american association colleges pharmacy aacp national organization pharmaceutical education educators	0	0	2	3	5	2	0	7	2	4	3	11	6	4	8	5	2	0	4
dir yahoo health pharmacy pharmacy resources yahoo directory collection sites information medications pharmaceutical industry sites pharmacy schools professional organizations	health	dir yahoo health pharmacy pharmacy resources yahoo directory collection sites medications pharmaceutical industry sites pharmacy schools professional organizations	0	0	2	3	5	2	0	7	2	4	3	11	6	4	4	15	2	0	4
walgreens walgreens com online pharmacy drugstore prescriptions health walgreens com america online pharmacy serving prescriptions health wellness products health information photo services	health	walgreens walgreens online pharmacy drugstore prescriptions health walgreens america online pharmacy serving prescriptions health wellness products health photo services	0	0	2	3	5	2	0	7	2	4	3	7	6	10	4	15	2	0	2
wikipedia wiki pharmacy pharmacy wikipedia encyclopedia pharmacy greek φάρμακον drug health profession links health sciences chemical sciences charged	health	wikipedia wiki pharmacy pharmacy wikipedia encyclopedia pharmacy greek φάρμακον drug health profession links health sciences chemical sciences charged	0	0	2	3	5	2	0	7	2	6	3	7	6	4	8	5	2	0	4
pharmacy world-wide web virtual library pharmacy website pharmacy internet resources information	health	pharmacy wide web virtual library pharmacy website pharmacy internet resources	0	0	2	3	5	2	0	7	2	4	3	11	6	4	8	15	2	0	4
krispin nutrition health nutrients health maintenance guidelines nutrition science unprocessed food health supplements	health	krispin nutrition health nutrients health maintenance guidelines nutrition science unprocessed food health supplements	0	0	2	3	5	2	7	7	7	5	10	7	4	10	4	15	13	14	0
csrees usda gov nea food food food nutrition health program leadership funding opportunities csrees food nutrition health programs strengthen nation capacity address issues	health	csrees usda gov nea food food food nutrition health program leadership funding opportunities csrees food nutrition health programs strengthen nation capacity address issues	0	0	2	3	5	2	7	7	7	5	10	7	4	4	4	15	15	14	0
fnic nal usda gov nal display index info center tax level tax subject topic child nutrition health lifecycle nutrition food symposium discussions leading scientific policy experts nutrition diet physical activity prevention health risks	health	fnic nal usda gov nal display info center tax level tax subject topic child nutrition health lifecycle nutrition food symposium discussions leading scientific policy experts nutrition diet physical activity prevention health risks	0	0	2	3	5	2	7	7	7	5	10	2	4	10	13	15	13	14	0
niddk nih gov health nutrition nutrition niddk nutrition health dietary guidelines americans national institutes health nih department health human services	health	niddk nih gov health nutrition nutrition niddk nutrition health dietary guidelines americans national institutes health nih department health human services	0	0	2	3	5	2	7	7	7	6	10	7	6	4	4	14	15	14	13
worldbank hnp health nutrition population home topics health nutrition population access health care africa franchising dialogue	health	worldbank hnp health nutrition population topics health nutrition population access health care africa franchising dialogue	0	0	2	3	5	2	7	7	7	6	10	7	4	4	4	14	4	14	13
cdc gov nchs nhanes data national health nutrition examination survey graphic link national health care survey graphic link national health interview survey graphic	health	cdc gov nchs nhanes data national health nutrition examination survey graphic link national health care survey graphic link national health interview survey graphic	0	0	2	3	5	2	7	7	7	6	5	7	6	4	4	14	4	15	13
self self com fitness health exercise nutrition diet self stories print magazine month health calculators workout slide fitness forums	health	fitness health exercise nutrition diet stories print magazine month health calculators workout slide fitness forums	0	0	2	3	5	2	7	7	7	5	10	2	4	10	13	15	13	14	0
ext edu cgi bin webobjects docs woa getcat cat hnf health nutrition foods applying cost benefit analysis nutrition education programs focus virginia expanded food nutrition education program	health	ext cgi bin webobjects docs woa getcat cat hnf health nutrition foods applying cost benefit analysis nutrition education programs focus virginia expanded food nutrition education program	0	0	2	3	5	2	7	7	7	6	10	7	6	10	4	15	15	14	13
food oregonstate edu nutri nutrition health medicine food resource http food nestlè foundation partnered ovid technologies collection information resources nutrition health	health	food oregonstate nutri nutrition health medicine food resource http food nestlè foundation partnered ovid technologies collection resources nutrition health	0	0	2	3	5	2	7	7	7	5	10	7	4	4	4	15	15	14	0
usa gov citizen topics health shtml health nutrition usa gov usa gov health nutrition access government resources health care insurance diet fitness public health	health	usa gov citizen topics health shtml health nutrition usa gov usa gov health nutrition access government resources health care insurance diet fitness public health	0	0	2	3	5	2	7	7	7	5	10	7	6	4	4	15	4	14	0
infoplease health health nutrition personal health nutrition disease mortality drugs alcohol	health	infoplease health health nutrition personal health nutrition disease mortality drugs alcohol	0	0	2	3	5	2	7	7	7	6	10	7	6	4	4	15	4	14	13
dir yahoo health nutrition nutrition yahoo directory food safety nutrition information health nutrition professionals brochures guides consumers	health	dir yahoo health nutrition nutrition yahoo directory food safety nutrition health nutrition professionals brochures guides consumers	0	0	2	3	5	2	7	7	7	5	10	7	6	4	4	15	15	14	13
blonz blonz guide nutrition food science health comprehensive nutrition foods health resource compiled nationally syndicated scientist journalist	health	blonz blonz guide nutrition food science health comprehensive nutrition foods health resource compiled nationally syndicated scientist journalist	0	0	2	3	5	2	7	7	7	5	10	7	4	10	4	15	15	14	0
urbanext uiuc edu nutrition index nutrition health university illinois extension written designed athlete easy-to-use nutrition guides classrooms after-school programs health care decisions	health	urbanext uiuc nutrition nutrition health university illinois extension written designed athlete easy nutrition guides classrooms school programs health care decisions	0	0	2	3	5	2	7	7	7	5	10	7	6	4	4	15	4	14	0
health gov dietaryguidelines dietary guidelines americans recommendations activities nationally experts nutrition health appointed assist departments health human services	health	health gov dietaryguidelines dietary guidelines americans recommendations activities nationally experts nutrition health appointed assist departments health human services	0	0	2	3	5	2	7	7	7	6	10	7	4	4	4	15	15	14	0
healthcare healthcare com healthcare healthcare com medical website information	health	healthcare healthcare healthcare healthcare medical website	0	0	2	3	5	2	0	4	2	4	5	10	6	12	8	0	4	0	4
sirweb patpub uterine shtml society interventional radiology patients public uterine fibroid symptoms diagnosis effective interventional radiology treatment hysterectomy	health	sirweb patpub uterine shtml society interventional radiology patients public uterine fibroid symptoms diagnosis effective interventional radiology treatment hysterectomy	0	0	2	3	5	2	0	4	2	6	5	11	0	4	10	14	4	15	13
cancer info medicalsymptoms medical symptoms diagnosis diagnosis symptoms symptoms fields blank diagnosis files	health	cancer info medicalsymptoms medical symptoms diagnosis diagnosis symptoms symptoms fields blank diagnosis files	0	0	2	3	5	2	7	7	7	6	5	7	0	3	10	14	5	15	13
yellowpages heraldextra provo dentists dentists provo dentists provo provo dentists orthodontics orthodontists straightening-braces dentists practice	health	yellowpages heraldextra provo dentists dentists provo dentists provo provo dentists orthodontics orthodontists straightening braces dentists practice	0	0	2	3	5	0	0	2	2	4	3	11	6	12	8	0	2	10	4
deltadentalca cgi bin providersearch premier dentist directory search dentist city zip code distance search dentist	health	deltadentalca cgi bin providersearch premier dentist directory search dentist city zip code distance search dentist	0	0	2	3	5	0	0	2	2	4	3	11	8	12	8	15	2	10	4
americasmiles dentists american dentist directory search dental directory review american dentist profiles dentists tooth whitening cosmetic dentistry specialties	health	americasmiles dentists american dentist directory search dental directory review american dentist profiles dentists tooth whitening cosmetic dentistry specialties	0	0	2	3	5	0	0	2	2	4	3	11	6	12	8	15	2	10	4
ada public disclaimer ada org disclaimer information ada dentists contact information ada dentists	health	ada public disclaimer ada org disclaimer ada dentists contact ada dentists	0	0	2	3	5	2	7	2	2	6	3	7	6	4	8	15	2	15	4
dentistdirectory dentist directory dentistdirectory com tool help dentist city dentist cosmetic dentist	health	dentistdirectory dentist directory dentistdirectory tool dentist city dentist cosmetic dentist	0	0	2	3	5	0	0	2	2	4	3	11	8	12	8	15	2	10	4
dentists dentists com dentist dentists com dental information dentist dental school check boards information dental licensing procedures regulations articles news	health	dentists dentists dentist dentists dental dentist dental school check boards dental licensing procedures regulations articles news	0	0	2	3	5	0	0	2	2	4	3	11	6	12	8	15	2	10	4
bls gov oco ocos dentists employment projected grow job openings dentists	health	bls gov oco ocos dentists employment projected grow job openings dentists	0	0	2	3	5	0	0	4	2	4	3	10	6	4	8	5	2	0	4
healthfinder gov healthfinder gov guide reliable health information healthfinder guide reliable health information department health human services	health	healthfinder gov healthfinder gov guide reliable health healthfinder guide reliable health department health human services	0	0	2	3	5	2	7	7	7	6	3	7	6	4	4	14	4	0	4
sfgate health gate health health insurance policy senate panel oks expansion child health insurance bipartisan defies bush	health	sfgate health gate health health insurance policy senate panel oks expansion child health insurance bipartisan defies bush	0	0	2	3	5	2	7	4	7	5	10	10	6	14	8	15	15	0	0
who int world health organization publication catalog media resources health articles health news upcoming health events conferences summits	health	int health organization publication catalog media resources health articles health news upcoming health events conferences summits	0	0	2	3	5	2	7	7	7	6	3	7	6	4	4	0	15	0	13
nih gov national institutes health nih research organization healthy life burdens illness disability links resources health information	health	nih gov national institutes health nih organization healthy life burdens illness disability links resources health	0	0	2	3	5	2	7	7	7	6	3	7	6	4	4	14	15	0	13
wikipedia wiki health health wikipedia encyclopedia health level functional metabolic efficiency organism micro cellular macro social level medical field	health	wikipedia wiki health health wikipedia encyclopedia health level functional metabolic efficiency organism micro cellular macro social level medical field	0	0	2	3	5	2	0	4	2	6	3	2	4	10	8	5	13	0	2
washingtonpost health nid roll health health washingtonpost com news features washington post newsweek plus breaking news reports recalls alerts videos	health	washingtonpost health nid roll health health washingtonpost news features washington post newsweek breaking news reports recalls alerts videos	0	0	2	1	4	6	2	3	7	9	5	10	11	8	4	12	1	12	16
deltadental dentistsearch dentistsearchcontroller ccl dview dentistdentistsearch delta dental dentists dentist search national network dentists puerto rico dentist information	health	deltadental dentistsearch dentistsearchcontroller ccl dview dentistdentistsearch delta dental dentists dentist search national network dentists puerto rico dentist	0	0	2	3	5	0	0	2	2	4	3	11	8	12	8	15	2	10	4
health national clearinghouse alcohol drug information resource comprehensive information substance abuse prevention treatment	health	health national clearinghouse alcohol drug resource comprehensive substance abuse prevention treatment	0	0	2	3	5	2	7	7	7	6	3	11	8	7	4	15	15	0	13
google top health google directory health guides lay persons non-medical users medical practitioners reliable online medical health information	health	google top health google directory health guides lay persons medical users medical practitioners reliable online medical health	0	0	2	3	5	2	7	7	7	6	3	7	6	4	4	14	4	0	13
abcnews health abc news health index wish javascript visit text version abc news health index health headlines	health	abcnews health abc news health javascript visit text version abc news health health headlines	0	0	2	3	5	2	7	7	7	6	11	7	11	14	4	14	4	14	16
health gov www health gov key portal health information government	health	health gov health gov key portal health government	0	0	2	3	5	2	7	7	7	6	5	10	6	4	4	14	4	14	4
news yahoo health news articles yahoo news yahoo news health news headlines health articles weight loss medications diseases aging	health	news yahoo health news articles yahoo news yahoo news health news headlines health articles weight loss medications diseases aging	0	0	2	3	5	2	7	7	7	6	10	7	6	4	4	15	4	14	13
dir yahoo health health yahoo directory discover sites covering human health diseases conditions medications sexual health fitness nutrition reference news	health	dir yahoo health health yahoo directory discover sites covering human health diseases conditions medications sexual health fitness nutrition reference news	0	0	2	3	5	2	7	7	7	6	3	7	6	4	4	15	4	14	13
dmoz health directory health aol health health advice information diseases diet tips calorie body mass calculators chats message boards	health	dmoz health directory health aol health health advice diseases diet tips calorie body mass calculators chats message boards	0	0	2	3	5	2	7	7	7	5	10	2	4	10	13	15	13	14	0
msnbc msn health diet nutrition news information msnbc health news health fitness medical news health news msnbc	health	msnbc msn health diet nutrition news msnbc health news health fitness medical news health news msnbc	0	0	2	3	5	2	7	7	7	5	10	7	6	10	4	15	4	14	13
health health com home page health home page newsletter medical news healthy recipes exercise tips diet reviews health click sign	health	health health health newsletter medical news healthy recipes exercise tips diet reviews health click sign	0	0	2	3	5	2	7	7	7	5	10	7	6	10	13	15	4	14	0
nytimes pages health index health news york breaking news health news medicine fitness nutrition health care mental health drugs diet pregnancy babies cancer aids	health	nytimes health health news york breaking news health news medicine fitness nutrition health care mental health drugs diet pregnancy babies cancer aids	0	0	2	3	5	2	7	7	7	5	10	7	6	4	4	14	4	14	13
cnn health health news medicine diet fitness parenting cnn com news features sections diet fitness conditions parenting video clips health library reports	health	cnn health health news medicine diet fitness parenting cnn news features sections diet fitness conditions parenting video clips health library reports	0	0	2	3	5	2	7	7	7	5	10	7	6	4	4	15	4	14	0
health yahoo yahoo health medical dictionary disease symptoms treatments resources healthy living information drugs medicines	health	health yahoo yahoo health medical dictionary disease symptoms treatments resources healthy living drugs medicines	0	0	2	3	5	2	7	7	7	6	3	7	0	4	4	14	4	14	13
webmd webmd information health comprehensive health resources consumers physicians nurses educators news chat forums health quizzes consumer product updates	health	webmd webmd health comprehensive health resources consumers physicians nurses educators news chat forums health quizzes consumer product updates	0	0	2	3	5	2	7	7	7	6	3	7	6	4	4	14	5	15	13
onlinebooks library upenn edu webbin book subjectstart online books page browse call info art distillation french illustrated html levity com info evolution modern medicine osler	health	onlinebooks library upenn webbin book subjectstart online books browse call info art distillation french illustrated html levity info evolution modern medicine osler	1	2	3	2	2	4	2	5	6	8	0	9	7	1	14	8	11	9	19
latimes features health health los angeles leading online source national world entertainment sports news plus jobs estate cars shopping information	health	latimes features health health los angeles leading online source national entertainment sports news jobs estate cars shopping	0	1	1	0	4	6	5	3	2	4	5	7	6	14	8	6	3	12	4
webindia medicine index medicine webindia com aromatherapy chiropractic hydrotherapy magneto therapy osteopathy reiki acupuncture ayurveda homeopathy naturopathy siddha unani	health	webindia medicine medicine webindia aromatherapy chiropractic hydrotherapy magneto therapy osteopathy reiki acupuncture ayurveda homeopathy naturopathy siddha unani	0	0	2	3	5	2	0	4	2	5	3	11	6	3	2	5	2	5	4
switchboard find dentists dentists pages switchboard com switchboard com dentists neighborhood	health	switchboard dentists dentists switchboard switchboard dentists neighborhood	0	0	2	3	5	0	0	4	2	4	3	11	6	12	8	15	2	10	4
icd international college dentists icd international college dentists rockville maryland	health	icd international college dentists icd international college dentists rockville maryland	0	0	2	3	5	6	0	2	2	4	3	11	6	12	8	0	2	10	4
careerbuilder pli quicksrchv qskwd physical therapy physical therapy	health	careerbuilder pli quicksrchv qskwd physical therapy physical therapy	0	0	2	3	5	0	0	4	2	10	3	10	6	3	2	5	2	5	4
physicaltherapy physical therapy designed practical usable information public professional physical therapy community	health	physicaltherapy physical therapy designed practical usable public professional physical therapy community	0	0	2	3	5	0	0	4	2	10	3	10	6	3	2	5	2	5	4
psychologytoday mind body physical psychology physical therapy center learn physical therapy practitioner specializes treatment methods	health	psychologytoday mind body physical psychology physical therapy center learn physical therapy practitioner specializes treatment methods	0	0	2	3	5	2	0	4	2	5	3	10	6	3	2	5	2	5	4
topics nytimes top news health diseasesconditionsandhealthtopics physicaltherapy index inline nyt classifier physical therapy collection articles physical therapy published york one-on-one yoga classes effective physical therapy	health	topics nytimes top news health diseasesconditionsandhealthtopics physicaltherapy inline nyt classifier physical therapy collection articles physical therapy published york yoga classes effective physical therapy	0	0	2	3	5	2	0	4	2	5	10	7	6	4	4	14	4	5	4
physicaltherapy physical therapy alexander technique homepage alexander technique physical therapy information resources	health	physicaltherapy physical therapy alexander technique homepage alexander technique physical therapy resources	0	0	2	3	5	0	0	4	2	10	3	10	6	3	2	5	2	5	4
apta education apta education programs fax contents american physical therapy association rights reserved disclaimer privacy policy	health	apta education apta education programs fax contents american physical therapy association rights reserved disclaimer privacy policy	0	0	2	3	5	0	0	4	2	6	3	10	6	4	4	0	2	5	4
nismat ptcor physical therapy corner portal nismat physical therapy corner center sports medicine physical therapy tips tricks sports medicine professionals athletes	health	nismat ptcor physical therapy corner portal nismat physical therapy corner center sports medicine physical therapy tips tricks sports medicine professionals athletes	0	0	2	3	5	2	0	4	2	10	3	10	6	3	2	5	2	5	4
ptjournal archive journal archive issues home help feedback subscriptions archive search copyright american physical therapy association	health	ptjournal archive journal archive issues feedback subscriptions archive search copyright american physical therapy association	0	0	2	3	5	0	0	4	2	6	3	10	6	4	4	0	2	5	4
dir yahoo health medicine physical therapy physical therapy medicine yahoo directory yahoo reviewed sites medicine physical therapy	health	dir yahoo health medicine physical therapy physical therapy medicine yahoo directory yahoo reviewed sites medicine physical therapy	0	0	2	3	5	2	0	4	2	6	3	7	6	4	4	0	2	5	4
musc edu chp physical therapy physical therapy focuses potential impairment musculoskeletal neuromusculoskeletal	health	musc chp physical therapy physical therapy focuses potential impairment musculoskeletal neuromusculoskeletal	0	0	2	3	5	0	0	4	2	10	3	10	6	3	2	5	2	5	4
careerplanning about occupations phys therapist physical therapist career information physical therapists nature earnings learn training resources	health	careerplanning occupations phys therapist physical therapist career physical therapists nature earnings learn training resources	0	0	2	3	5	2	0	4	2	10	3	10	6	3	2	5	2	5	4
physicaltherapist physicaltherapist com world physical therapy physicaltherapist com serve community link world physical therapy physical therapists pta	health	physicaltherapist physicaltherapist physical therapy physicaltherapist serve community link physical therapy physical therapists pta	0	0	2	3	5	0	0	4	2	10	3	10	6	3	2	5	2	5	4
kidshealth parent system ill phys therapy physical therapy doctor prescribe physical therapy infant isn developmental milestones rolling sitting walking	health	kidshealth parent system ill phys therapy physical therapy doctor prescribe physical therapy infant isn developmental milestones rolling sitting walking	0	0	2	3	5	2	0	4	2	10	3	10	9	3	2	5	2	5	4
calmis gov file occguide dentist dentists california occupational guide statewide information job duties conditions employment outlook wages benefits	health	calmis gov file occguide dentist dentists california occupational guide statewide job duties conditions employment outlook wages benefits	0	0	2	3	5	0	0	2	2	4	3	10	6	14	8	5	2	10	4
automailer tws physical therapy jobs schools equipment physical therapy physical therapy physiotherapy physical therapists physical therapists physical therapy physiotherapy net	health	automailer tws physical therapy jobs schools equipment physical therapy physical therapy physiotherapy physical therapists physical therapists physical therapy physiotherapy net	0	0	2	3	5	0	0	4	2	10	3	10	6	3	2	5	2	5	4
wikipedia wiki physical therapy physical therapy wikipedia encyclopedia physical therapy physiotherapy provision services people populations maintain restore maximum movement	health	wikipedia wiki physical therapy physical therapy wikipedia encyclopedia physical therapy physiotherapy provision services people populations maintain restore maximum movement	0	0	2	3	5	0	0	4	2	10	3	10	6	3	2	5	2	5	4
ptjournal physical therapy peer-reviewed physical therapy journal journal american physical therapy association	health	ptjournal physical therapy peer reviewed physical therapy journal journal american physical therapy association	0	0	2	3	5	0	0	4	2	10	3	10	6	3	2	0	2	5	4
bls gov oco ocos physical therapists graduating accredited physical therapist educational program american physical therapy association	health	bls gov oco ocos physical therapists graduating accredited physical therapist educational program american physical therapy association	0	0	2	3	5	0	0	4	2	4	3	10	6	4	8	5	2	5	4
apta american physical therapy association apta national professional organization research physical therapy news consumer information career advice access issues	health	apta american physical therapy association apta national professional organization physical therapy news consumer career advice access issues	0	0	2	3	5	0	0	4	2	6	3	10	6	4	4	0	2	5	4
aawd american association women dentists aawd american association women dentists aawd women advancing dentistry international organization women dentists	health	aawd american association women dentists aawd american association women dentists aawd women advancing dentistry international organization women dentists	0	0	2	3	5	6	0	4	2	6	3	11	6	12	8	0	2	10	4
acd american college dentists american college dentists acd honorary professional organization dentists exemplified excellence	health	acd american college dentists american college dentists acd honorary professional organization dentists exemplified excellence	0	0	2	3	5	6	0	2	2	4	3	11	6	12	8	5	2	10	4
facd american college dentists	health	facd american college dentists	0	0	2	3	5	6	0	2	2	4	3	11	6	12	8	0	2	10	4
nlm nih gov medlineplus directories medlineplus directories doctors dentists --specialists aace physician finder american association clinical endocrinologists acog physician directory american college	health	nlm nih gov medlineplus directories medlineplus directories doctors dentists specialists aace physician finder american association clinical endocrinologists acog physician directory american college	0	0	2	3	5	2	0	4	7	6	3	7	6	4	4	0	2	0	4
epa gov glnpo bnsdocs hgsbook dentist mercury dentists grams mercury dentist approximate dental imperative dentists handle mercury office	health	epa gov glnpo bnsdocs hgsbook dentist mercury dentists grams mercury dentist approximate dental imperative dentists handle mercury office	0	0	2	3	5	0	0	2	2	4	3	11	8	12	8	15	2	10	4
dentalsite dentists dentalsite com web resources dentists dentalsite com web resources dentists web links publications mailing lists chat sites dentists	health	dentalsite dentists dentalsite web resources dentists dentalsite web resources dentists web links publications mailing lists chat sites dentists	0	0	2	3	5	0	0	2	2	4	3	11	6	12	8	0	2	10	4
onlinedentists dental products business directory dental resources dental products business directory classifieds resources dentists dental professionals	health	onlinedentists dental products business directory dental resources dental products business directory classifieds resources dentists dental professionals	0	0	2	3	5	0	0	2	2	4	3	11	6	12	8	15	2	10	4
careerbuilder jobseeker jobs jobdetails job did hngf jobs dentists jobs battle creek multi-practice ambulatory care community health center openings qualified dentists	health	careerbuilder jobseeker jobs jobdetails job hngf jobs dentists jobs battle creek multi practice ambulatory care community health center openings qualified dentists	0	0	2	3	5	0	0	4	2	4	3	10	6	4	8	0	2	0	4
tsbde state dbsearch tsbde licensure verification database search search dentists dental hygienists dental laboratories search search dentists hygienists laboratories assistants	health	tsbde dbsearch tsbde licensure verification database search search dentists dental hygienists dental laboratories search search dentists hygienists laboratories assistants	0	0	2	3	5	0	0	2	2	4	3	11	6	12	8	15	2	10	4
physicaltherapy about physical therapy physical therapy links student information exercises information physical therapy	health	physicaltherapy physical therapy physical therapy links student exercises physical therapy	0	0	2	3	5	0	0	4	2	10	3	10	6	3	2	5	2	5	4
physicaltherapy about careersinphysicaltherapy ptschools physical therapy schools directory physical therapy schools links physical therapy school programs	health	physicaltherapy careersinphysicaltherapy ptschools physical therapy schools directory physical therapy schools links physical therapy school programs	0	0	2	3	5	0	0	4	2	10	3	10	6	3	2	5	2	5	4
priory med medicine on-line medicine online medicine online independent peer reviewed medical journal published priory medical journals priory com	health	priory med medicine medicine online medicine online independent peer reviewed medical journal published priory medical journals priory	0	0	2	3	5	2	0	4	2	6	3	7	6	3	4	0	2	0	4
health yahoo medical dictionary diseases healthy living drugs medicines medical dictionary disease symptoms treatments resources healthy living information drugs medicines	health	health yahoo medical dictionary diseases healthy living drugs medicines medical dictionary disease symptoms treatments resources healthy living drugs medicines	0	0	2	3	5	2	7	7	7	6	3	7	0	4	4	14	4	14	13
biostat ucsf edu epidem epidem www epidemiology virtual library listing database epidemiology subjects	health	biostat ucsf epidem epidem epidemiology virtual library listing database epidemiology subjects	0	0	2	3	5	2	0	4	2	6	3	11	8	4	8	0	2	5	15
epidem epidemiology home journal international society environmental epidemiology contents search feature subscription society information	health	epidem epidemiology journal international society environmental epidemiology contents search feature subscription society	0	0	2	3	5	2	0	4	2	6	3	7	6	4	8	0	2	5	4
wikipedia wiki epidemiology epidemiology wikipedia encyclopedia epidemiology study factors affecting health illness populations serves foundation logic interventions	health	wikipedia wiki epidemiology epidemiology wikipedia encyclopedia epidemiology study factors health illness populations serves foundation logic interventions	0	0	2	3	5	2	0	7	7	6	3	7	6	4	8	14	5	0	4
virginiahospitalcenter virginia hospital center virginia hospital center home page virginia hospital center -bed tertiary care facility arlington virginia hospital accredited joint commission accreditation	health	virginiahospitalcenter virginia hospital center virginia hospital center virginia hospital center bed tertiary care facility arlington virginia hospital accredited joint commission accreditation	0	0	2	3	5	2	0	4	2	4	5	10	6	4	4	0	2	0	4
wikipedia wiki hospital county limerick hospital county limerick wikipedia encyclopedia hospital towns limerick hosts retail outlets businesses town population people	health	wikipedia wiki hospital county limerick hospital county limerick wikipedia encyclopedia hospital towns limerick hosts retail outlets businesses town population people	0	0	2	3	5	0	0	4	2	4	5	10	6	4	8	0	2	0	4
medindia patients hospital find hospital online listing database indian hospitals search city pincode	health	medindia patients hospital hospital online listing database indian hospitals search city pincode	0	0	2	3	5	2	0	4	2	6	5	10	8	4	4	0	2	0	4
uhhospitals university hospitals university hospitals cleveland building proud -year heritage fresh	health	uhhospitals university hospitals university hospitals cleveland building heritage fresh	0	0	2	3	5	2	0	4	2	4	5	10	6	12	8	0	2	0	4
gwhospital hospital information hospital departments community services publications	health	gwhospital hospital hospital departments community services publications	0	0	2	3	5	2	0	4	2	6	5	10	6	4	4	0	2	0	4
avistahospital avista adventist hospital welcome avista adventist hospital avista adventist hospital louisville colorado avista adventist hospital -bed service acute care hospital medical staff	health	avistahospital avista adventist hospital avista adventist hospital avista adventist hospital louisville colorado avista adventist hospital bed service acute care hospital medical staff	0	0	2	3	5	2	0	4	2	6	5	10	6	4	4	0	2	0	4
americanhospitals hospitals hospital locator search hospitals united hospitals physicians medical organizations united serving international patients	health	americanhospitals hospitals hospital locator search hospitals united hospitals physicians medical organizations united serving international patients	0	0	2	3	5	2	0	4	2	6	5	10	6	4	8	0	2	0	4
arthospital hospital	health	arthospital hospital	0	1	2	3	5	2	0	4	2	6	5	12	8	4	4	0	2	12	13
childrenshospital children hospital boston pediatric teaching hospital harvard medical school departments clinics research information patients	health	childrenshospital children hospital boston pediatric teaching hospital harvard medical school departments clinics patients	0	0	2	3	5	2	0	4	2	6	5	10	6	4	4	0	2	0	4
hospitalsoup nursing jobs nursing job employment hospital jobs hospital directory featuring hospitals healthcare jobs nursing medical resources medical links	health	hospitalsoup nursing jobs nursing job employment hospital jobs hospital directory featuring hospitals healthcare jobs nursing medical resources medical links	0	0	2	3	5	2	0	4	2	4	5	10	6	4	8	0	2	0	4
gateway ovid ovidweb cgi mode ovid news toc ovft epidemiology	health	gateway ovid ovidweb cgi mode ovid news toc ovft epidemiology	0	0	1	3	4	3	3	2	7	5	7	4	7	11	10	14	8	12	5
imdb title hospital hospital imdb movies celebs	health	imdb title hospital hospital imdb movies celebs	0	1	0	2	3	0	1	8	6	10	7	0	7	7	3	10	0	12	6
jeffersonhospital jefferson university hospital information hospital departments centers programs community programs services international patients philadelphia	health	jeffersonhospital jefferson university hospital hospital departments centers programs community programs services international patients philadelphia	0	0	2	3	5	2	0	4	2	6	5	10	6	4	8	0	2	0	4
answers topic hospital hospital definition synonyms answers com hos·pi·tal institution medical surgical psychiatric care treatment sick injured	health	answers topic hospital hospital definition synonyms answers institution medical surgical psychiatric care treatment sick injured	0	0	2	3	5	2	0	4	2	6	3	7	6	4	8	5	2	0	4
ucomparehealthcare hospital start hospital compare reports ucomparehealthcare hospital report research compare patient safety quality surgical infection rates charges demographic information	health	ucomparehealthcare hospital start hospital compare reports ucomparehealthcare hospital report compare patient safety quality surgical infection rates charges demographic	0	0	2	3	5	2	0	4	2	6	5	10	8	4	8	0	2	0	4
ahd freesearch american hospital directory hospital information american hospital directory operational data financial information utilization statistics benchmarks acute care hospitals	health	ahd freesearch american hospital directory hospital american hospital directory operational data financial utilization statistics benchmarks acute care hospitals	0	0	2	3	5	2	0	4	2	6	5	10	6	4	4	0	2	0	4
ahd american hospital directory information hospitals online information hospitals database federal files aha annual survey data american hospital	health	ahd american hospital directory hospitals online hospitals database federal files aha annual survey data american hospital	0	0	2	3	5	2	0	4	2	6	5	10	6	4	4	0	2	0	4
gehealthcare healthcare services medical imaging information technologies medical diagnostics patient monitoring systems disease research drug discovery	health	gehealthcare healthcare services medical imaging technologies medical diagnostics patient monitoring systems disease drug discovery	0	0	2	3	5	2	7	4	7	6	3	7	0	4	10	5	4	0	15
hospitallink hospitals hospitallink com hospital web sites town country hospitals city	health	hospitallink hospitals hospitallink hospital web sites town country hospitals city	0	0	2	3	5	2	0	4	2	4	5	10	6	4	8	0	2	0	4
wikipedia wiki hospital hospital wikipedia encyclopedia hospitals funded health organisations profit non-profit health insurances charities	health	wikipedia wiki hospital hospital wikipedia encyclopedia hospitals funded health organisations profit profit health insurances charities	0	0	2	3	5	2	0	4	2	6	5	10	6	4	8	0	2	0	4
health yahoo drug drug guide yahoo health information prescription over-the-counter medications description dosage storage precautions effects	health	health yahoo drug drug guide yahoo health prescription counter medications description dosage storage precautions effects	0	0	2	3	5	2	7	7	7	6	3	11	8	7	4	15	15	0	13
drugtopics drug topics home page reducing drug errors tips patients thimerosal mercury preservative banned otc drugs	health	drugtopics drug topics reducing drug errors tips patients thimerosal mercury preservative banned otc drugs	0	0	2	3	5	2	7	7	7	6	3	11	8	7	8	15	15	0	13
drugpolicy drug policy alliance alternatives marijuana prohibition organization war drugs promote drug policies science public health human rights	health	drugpolicy drug policy alliance alternatives marijuana prohibition organization war drugs promote drug policies science public health human rights	0	0	2	3	5	2	7	7	7	6	3	11	8	4	4	5	15	0	15
usdoj gov dea concern concern dea drug information information effects drugs cocaine heroin inhalants marijuana mdma ecstasy methamphetamine steroids	health	usdoj gov dea concern concern dea drug effects drugs cocaine heroin inhalants marijuana mdma ecstasy methamphetamine steroids	0	0	2	3	5	2	7	7	7	6	11	11	8	7	4	5	15	5	15
dir yahoo health pharmacy drugs and medications drugs medications yahoo directory learn drugs medications sites devoted drugs plus medicine guides drug interaction information substance abuse drug policy	health	dir yahoo health pharmacy drugs medications drugs medications yahoo directory learn drugs medications sites devoted drugs medicine guides drug interaction substance abuse drug policy	0	0	2	3	5	2	7	7	7	6	3	11	8	7	4	15	15	0	13
tophospitals hospitals hcia inc hospitals solely empirical findings publicly performance data	health	tophospitals hospitals hcia hospitals solely empirical findings publicly performance data	0	0	2	3	5	2	0	4	2	6	5	10	6	4	4	0	2	0	4
content nejm england journal medicine research review articles england journal medicine nejm weekly medical journal publishes medical research findings review articles editorial	health	content nejm england journal medicine review articles england journal medicine nejm weekly medical journal publishes medical findings review articles editorial	0	0	2	3	5	2	0	4	2	6	3	11	6	4	4	0	2	0	4
cdc gov ncidod dvrd rabies epidemiology epidemiology epidemiology cdc rabies epidemiology study distribution causes disease populations epidemiologists study people animals disease	health	cdc gov ncidod dvrd rabies epidemiology epidemiology epidemiology cdc rabies epidemiology study distribution disease populations epidemiologists study people animals disease	0	0	2	3	5	2	0	7	7	6	11	7	6	4	10	14	5	15	15
who int topics epidemiology epidemiology epidemiology page links descriptions activities reports news events contacts cooperating partners	health	int topics epidemiology epidemiology epidemiology links descriptions activities reports news events contacts cooperating partners	0	0	2	3	5	2	0	7	2	6	3	7	8	4	4	0	5	15	15
medicinerestaurant welcome medicine restaurant new-shojin eatstation medicine new-shojin eatstation founded experienced restaurateurs japan hong kong motivated	health	medicinerestaurant medicine restaurant shojin eatstation medicine shojin eatstation founded experienced restaurateurs japan hong kong motivated	1	2	3	2	3	3	6	5	2	10	5	11	8	14	2	0	8	4	19
topix med medicine news topix news medicine continually updated net	health	topix med medicine news topix news medicine continually updated net	0	0	2	3	5	2	0	7	7	6	11	7	8	4	8	14	5	15	15
emedicine emedicine world medical library allergy-immunology emedicine features up-to-date searchable peer-reviewed medical journals online physician reference textbooks full-text article database	health	emedicine emedicine medical library allergy immunology emedicine features searchable peer reviewed medical journals online physician reference textbooks text article database	0	0	2	3	5	2	0	4	7	6	3	7	6	4	4	0	2	0	4
nature home nature medicine nature medicine premier journal biomedical research respected internationally quality papers ranging infectious	health	nature nature medicine nature medicine premier journal biomedical respected internationally quality papers ranging infectious	0	0	2	3	5	2	0	4	7	6	3	7	6	4	4	14	2	5	4
sciencedaily news health medicine sciencedaily health medicine news medical research news health news cancer nutrition full-text images updated daily	health	sciencedaily news health medicine sciencedaily health medicine news medical news health news cancer nutrition text images updated daily	0	0	2	3	5	2	7	7	7	6	10	7	6	4	4	14	4	14	13
gateway ovid ovidweb cgi mode ovid news toc ovft medicine	health	gateway ovid ovidweb cgi mode ovid news toc ovft medicine	0	0	1	3	4	3	3	2	7	5	7	4	7	11	10	14	8	12	5
google top health medicine google directory health medicine search medicine search web medicine health medicine directory home categories medicine sciences	health	google top health medicine google directory health medicine search medicine search web medicine health medicine directory categories medicine sciences	0	0	2	3	5	2	0	7	2	6	3	7	6	4	4	0	2	0	4
journal medicine home bimonthly journal covering clinical investigation hospital office practice	health	journal medicine bimonthly journal covering clinical investigation hospital office practice	0	0	2	3	5	2	0	4	2	6	3	7	6	4	4	0	2	0	4
nlm nih gov national library medicine national institutes health national institutes health national library medicine access health information consumer patient physicians	health	nlm nih gov national library medicine national institutes health national institutes health national library medicine access health consumer patient physicians	0	0	2	3	5	2	7	7	7	6	3	7	6	4	4	14	15	0	13
ohsu edu cliniweb wwwvl medicine	health	ohsu cliniweb wwwvl medicine	0	0	2	3	5	2	0	2	2	10	3	11	0	4	14	15	2	0	4
dmoz health medicine directory health medicine directory health medicine health medicine description medical specialties surgery	health	dmoz health medicine directory health medicine directory health medicine health medicine description medical specialties surgery	0	0	2	3	5	2	0	7	2	6	3	7	6	4	4	0	2	0	4
medlineplus gov medlineplus health information national library medicine health information national library medicine access medline health topics medical dictionaries directories publications	health	medlineplus gov medlineplus health national library medicine health national library medicine access medline health topics medical dictionaries directories publications	0	0	2	3	5	2	7	7	7	6	3	7	6	4	4	0	15	0	4
dir yahoo health medicine medicine yahoo directory collection sites health professionals sections disciplines organizations education conferences publications	health	dir yahoo health medicine medicine yahoo directory collection sites health professionals sections disciplines organizations education conferences publications	0	0	2	3	5	2	0	7	2	6	3	7	6	4	4	0	2	0	4
depts washington edu epidem university washington dept epidemiology admission information graduate program course listings information seminars faculty directory resources	health	depts washington epidem university washington dept epidemiology admission graduate program listings seminars faculty directory resources	0	0	2	3	5	2	0	4	2	4	3	10	6	4	8	5	2	10	4
wikipedia wiki medicine medicine wikipedia encyclopedia medicine maintaining restoring human health study diagnosis treatment latin ars	health	wikipedia wiki medicine medicine wikipedia encyclopedia medicine maintaining restoring human health study diagnosis treatment latin ars	0	0	2	3	5	2	0	4	2	6	3	7	6	4	10	14	5	0	4
dir yahoo health medicine epidemiology epidemiology medicine yahoo directory yahoo reviewed sites medicine epidemiology	health	dir yahoo health medicine epidemiology epidemiology medicine yahoo directory yahoo reviewed sites medicine epidemiology	0	0	2	3	5	2	0	7	2	6	3	7	6	4	4	0	2	0	4
users rcn jkimball ultranet biologypages epidemiology epidemiology experimentation ethical humans methods criteria epidemiology	health	users rcn jkimball ultranet biologypages epidemiology epidemiology experimentation ethical humans methods criteria epidemiology	0	0	1	3	5	3	0	4	2	6	11	11	6	4	10	0	8	5	15
interscience wiley jpages genetic epidemiology abstracts annual meeting international genetic epidemiology society petersburg florida	health	interscience wiley jpages genetic epidemiology abstracts annual meeting international genetic epidemiology society petersburg florida	0	0	2	3	5	2	0	4	2	6	11	7	6	4	10	0	5	5	15
sph umich edu epid sph department epidemiology department epidemiology university michigan continuously disease burden human populations	health	sph umich epid sph department epidemiology department epidemiology university michigan continuously disease burden human populations	0	0	2	3	5	2	0	7	2	4	3	11	6	4	8	5	2	0	4
epidem epidemiology abstract jsessionid fwyhltc gmgbfmdhk kqhvkd vtfvhhlhphttkgjjzj kpctst epidemiology abstract volume epidemiology sallmen markku sandler dale hoppin jane blair aaron baird abstract	health	epidem epidemiology abstract jsessionid fwyhltc gmgbfmdhk kqhvkd vtfvhhlhphttkgjjzj kpctst epidemiology abstract volume epidemiology sallmen markku sandler dale hoppin jane blair aaron baird abstract	0	0	1	3	5	3	0	4	2	4	3	11	8	11	8	5	8	5	15
epi jhsph edu department epidemiology johns hopkins bloomberg johns hopkins bloomberg school public health course study epidemiology	health	epi jhsph department epidemiology johns hopkins bloomberg johns hopkins bloomberg school public health study epidemiology	0	0	2	3	5	2	0	4	2	4	3	10	6	4	8	5	2	14	4
topix med epidemiology epidemiology news topix news epidemiology continually updated net	health	topix med epidemiology epidemiology news topix news epidemiology continually updated net	0	0	2	3	5	2	0	7	7	6	11	7	8	4	8	14	5	15	15
ije oxfordjournals oxford journals medicine international journal epidemiology communication engaged research teaching application epidemiology communicable non-communicable disease	health	ije oxfordjournals oxford journals medicine international journal epidemiology communication engaged teaching application epidemiology communicable communicable disease	0	0	2	3	5	2	0	4	2	6	3	11	6	4	10	0	2	5	4
sciencemag cgi collection epidemiology science aaas collections epidemiology search epidemiology search criteria epidemiology refine section view research news reviews perspectives essays editorials	health	sciencemag cgi collection epidemiology science aaas collections epidemiology search epidemiology search criteria epidemiology refine view news reviews perspectives essays editorials	0	0	2	3	5	3	0	4	2	6	3	11	8	4	4	0	2	5	15
aje oxfordjournals oxford journals medicine american journal epidemiology published oxford university press devoted publication empirical research finding field methodological developments opinion pieces	health	aje oxfordjournals oxford journals medicine american journal epidemiology published oxford university press devoted publication empirical finding field methodological developments opinion pieces	0	0	2	3	5	2	0	4	2	6	3	11	6	4	4	0	2	5	4
jstor journals jstor epidemiology epidemiology peer-reviewed scientific journal publishes research spectrum epidemiologic topics	health	jstor journals jstor epidemiology epidemiology peer reviewed scientific journal publishes spectrum epidemiologic topics	0	0	2	3	5	2	0	4	2	6	3	11	6	4	4	0	2	5	4
pitt edu super supercourse epidemiology internet global health course designed overview epidemiology internet medical health students world	health	pitt super supercourse epidemiology internet global health designed overview epidemiology internet medical health students	0	0	2	3	5	2	0	7	2	6	11	11	6	4	10	0	2	0	15
epidemiology drug safety pharmacoepidemiology pharma resourcing helps pharmaceutical companies short-term resourcing well-qualified pharmaceutical	health	epidemiology drug safety pharmacoepidemiology pharma resourcing helps pharmaceutical companies short term resourcing qualified pharmaceutical	0	0	2	3	5	2	0	7	2	4	3	11	6	4	8	5	2	0	4
medicinenet health medical information doctors medicinenet com doctor-produced health medical information written informed decisions health	health	medicinenet health medical doctors medicinenet doctor produced health medical written informed decisions health	0	0	2	3	5	2	7	7	7	5	10	7	6	4	4	15	4	0	13
bbc health conditions bbc health illnesses conditions page access information illnesses conditions summaries diseases conditions	health	bbc health conditions bbc health illnesses conditions access illnesses conditions summaries diseases conditions	0	0	2	3	5	2	7	7	7	6	3	7	0	4	4	14	4	14	13
bbc health conditions diabetes bbc health conditions people diabetes people condition	health	bbc health conditions diabetes bbc health conditions people diabetes people condition	0	0	2	3	5	2	7	7	7	6	10	7	0	4	4	14	4	14	13
kidshealth teen your mind problems deal chronic illness health condition teenagers cope control deal	health	kidshealth teen mind deal chronic illness health condition teenagers cope control deal	0	0	2	3	5	2	7	7	7	6	3	7	0	4	8	14	5	0	13
wdsu news detail supporters rally memorial hospital doctor news story wdsu orleans supporters doctor accused killing patients memorial medical center hurricane katrina hold rally anniversary	health	wdsu news detail supporters rally memorial hospital doctor news story wdsu orleans supporters doctor accused killing patients memorial medical center hurricane katrina hold rally anniversary	0	0	2	2	3	6	0	4	2	2	5	12	0	14	8	8	4	10	8
gwhospital hospital doctor doctor george washington physician referral service help gw-docs	health	gwhospital hospital doctor doctor george washington physician referral service gw docs	0	0	2	3	5	2	0	4	2	6	5	10	6	14	4	0	2	0	4
webserver bjc sfnet bjh physiciansearch barnes-jewish hospital physician search doctors listed referral directory medical staff barnes-jewish hospital doctors payment referral	health	webserver bjc sfnet bjh physiciansearch barnes jewish hospital physician search doctors listed referral directory medical staff barnes jewish hospital doctors payment referral	0	0	2	3	5	2	0	4	2	6	5	10	6	4	4	0	2	0	4
doctorshospital doctors hospital life doctors hospital opelousas community healthcare provider dedicated serving healthcare landry parish surrounding	health	doctorshospital doctors hospital life doctors hospital opelousas community healthcare provider dedicated serving healthcare landry parish surrounding	0	0	2	3	5	2	0	4	2	6	5	10	6	4	8	0	4	0	4
medicalnewstoday articles advocate south suburban hospital doctor tips jogging neighborhood biking trails inline skating chicago lakefront	health	medicalnewstoday articles advocate south suburban hospital doctor tips jogging neighborhood biking trails inline skating chicago lakefront	0	0	2	3	5	6	0	4	2	10	5	2	6	12	8	10	4	12	10
rcseng news newsitem hospital doctor interview president bernard ribeiro magazine hospital doctor interviewed bernard ribeiro president college feature interview touches	health	rcseng news newsitem hospital doctor interview president bernard ribeiro magazine hospital doctor interviewed bernard ribeiro president college feature interview touches	0	0	2	2	5	6	0	4	2	2	5	0	6	14	4	0	2	12	4
msnbc msn visits doctors hospitals percent health care msnbc com hospital doctor visits united surged percent prescribed medications	health	msnbc msn visits doctors hospitals percent health care msnbc hospital doctor visits united surged percent prescribed medications	0	0	2	3	5	2	0	4	2	6	5	10	6	4	4	0	4	0	4
baptisthealth bhs hospital front doctors hospital doctors hospital heart historic coral gables -bed acute care facility high-quality medical care	health	baptisthealth bhs hospital front doctors hospital doctors hospital heart historic coral gables bed acute care facility quality medical care	0	0	2	3	5	2	0	4	2	6	5	10	6	4	4	0	2	0	4
healthgrades healthgrades research hospitals doctors nursing homes research hospitals doctors nursing homes comprehensive hospital report information cost patient safety	health	healthgrades healthgrades hospitals doctors nursing homes hospitals doctors nursing homes comprehensive hospital report cost patient safety	0	0	2	3	5	2	0	4	2	6	5	10	6	4	8	0	2	0	4
prospects cms showpage home explore types jobs types job eipal state showocc idno doctor hospital job description activities hospital doctors apply medical knowledge skills diagnosis prevention treatment illnesses diseases infections patients	health	prospects cms showpage explore types jobs types job eipal showocc idno doctor hospital job description activities hospital doctors apply medical knowledge skills diagnosis prevention treatment illnesses diseases infections patients	0	0	2	3	5	2	0	7	2	6	5	7	0	4	4	14	5	0	4
elsevier wps product cws home hospital doctor elsevier hospital doctor bibliographic information issn imprint elsevier subscriptions issues personal price	health	elsevier wps product cws hospital doctor elsevier hospital doctor bibliographic issn imprint elsevier subscriptions issues personal price	0	0	2	3	5	2	0	4	2	6	3	11	6	4	4	0	2	0	4
brighamandwomens mdsearch default brigham women hospital teaching affiliate harvard doctor font font pixels brigham women hospital physician entry	health	brighamandwomens mdsearch default brigham women hospital teaching affiliate harvard doctor font font pixels brigham women hospital physician entry	0	0	2	3	5	2	0	4	2	6	5	10	6	4	4	0	2	0	4
mediauk magazines hospital doctor hospital doctor media information hospital doctor magazine address contact	health	mediauk magazines hospital doctor hospital doctor media hospital doctor magazine address contact	0	0	2	3	5	2	0	4	2	6	5	10	6	14	4	0	2	12	4
wdsu news detail psp news memorial hospital doctor sues attorney news story wdsu orleans anna pou physician arrested deaths patients memorial medical center hurricane katrina files suit	health	wdsu news detail psp news memorial hospital doctor sues attorney news story wdsu orleans anna pou physician arrested deaths patients memorial medical center hurricane katrina files suit	0	0	2	2	3	6	0	4	2	2	5	12	0	14	8	8	4	10	8
doctors hospital doctors hospital augusta home page full-service facility home nationally acclaimed burn center delivering medical care state-of-the-art medical	health	doctors hospital doctors hospital augusta service facility nationally acclaimed burn center delivering medical care art medical	0	0	2	3	5	2	0	4	2	6	5	10	6	4	4	0	2	0	4
hospital doctor hospital doctor information education resource health professionals service patients regarded	health	hospital doctor hospital doctor education resource health professionals service patients regarded	0	0	2	3	5	2	0	4	2	6	5	10	6	4	4	0	2	0	4
sciencedaily healthology lung cancer focusarea lung cancer health information lung cancer health articles videos lung cancer health topics	health	sciencedaily healthology lung cancer focusarea lung cancer health lung cancer health articles videos lung cancer health topics	0	0	2	3	5	2	7	7	7	6	5	7	0	12	8	14	4	15	13
nihseniorhealth gov lungcancer toc nihseniorhealth lung cancer table contents lung cancer table contents lung cancer causes risk factors symptoms diagnosis treatments research	health	nihseniorhealth gov lungcancer toc nihseniorhealth lung cancer table contents lung cancer table contents lung cancer risk factors symptoms diagnosis treatments	0	0	2	3	5	2	7	7	7	6	5	7	0	12	10	14	5	15	13
cancer docroot cri cri sitearea lrn acs cancer answers questions cancer mark american cancer society trademark american cancer society	health	cancer docroot cri cri sitearea lrn acs cancer answers questions cancer mark american cancer society trademark american cancer society	0	0	2	3	5	2	7	7	7	6	5	7	0	12	8	14	4	15	13
alcase lung cancer alliance alcase nonprofit organization dedicated solely helping people lung cancer quality life	health	alcase lung cancer alliance alcase nonprofit organization dedicated solely helping people lung cancer quality life	0	0	2	3	5	2	7	7	7	6	5	7	0	12	8	14	4	15	13
nlm nih gov medlineplus tutorials lungcancer index medlineplus interactive tutorials lung cancer lung cancer tutorial multimedia presentation questions flash player download flash download button flash player	health	nlm nih gov medlineplus tutorials lungcancer medlineplus interactive tutorials lung cancer lung cancer tutorial multimedia presentation questions flash player download flash download button flash player	0	0	2	3	5	2	7	4	7	6	11	7	0	12	10	14	5	5	15
cancerbackup cancertype lung lung cancer information centre cancerbackup overview disease lung cancer diagnosis treatment options clinical trials resources	health	cancerbackup cancertype lung lung cancer centre cancerbackup overview disease lung cancer diagnosis treatment options clinical trials resources	0	0	2	3	5	2	7	7	7	6	5	7	0	12	10	14	5	15	13
medicalnewstoday sections lung cancer lung cancer news medical news lung cancer news headlines published daily	health	medicalnewstoday sections lung cancer lung cancer news medical news lung cancer news headlines published daily	0	0	2	3	5	2	7	7	7	6	5	7	0	12	8	14	4	15	13
cancer gov cancertopics wyntk lung about™ lung cancer national cancer institute information detection symptoms diagnosis treatment lung cancer nih publication	health	cancer gov cancertopics wyntk lung lung cancer national cancer institute detection symptoms diagnosis treatment lung cancer nih publication	0	0	2	3	5	2	7	7	7	6	5	7	0	12	8	14	4	15	13
sciencedaily news health medicine lung cancer sciencedaily lung cancer news information cancer symptoms treatments explore research cancers lung breast prostate blood colon	health	sciencedaily news health medicine lung cancer sciencedaily lung cancer news cancer symptoms treatments explore cancers lung breast prostate blood colon	0	0	2	3	5	2	7	7	7	6	5	7	0	12	8	14	4	15	13
oncolink types types cancer information research treatment oncolink web cancer resource comprehensive information cancer cancer lung cancers lung cancers lung cancer	health	oncolink types types cancer treatment oncolink web cancer resource comprehensive cancer cancer lung cancers lung cancers lung cancer	0	0	2	3	5	2	7	7	7	6	5	7	0	12	8	14	4	15	13
women gov faq lung lung cancer cancers lungs non-small cell lung cancer cell lung cancer cells	health	women gov faq lung lung cancer cancers lungs cell lung cancer cell lung cancer cells	0	0	2	3	5	2	7	7	7	6	5	7	0	12	8	14	4	15	13
webmd lung cancer default webmd lung cancer health center lung cancer information lung cancer diagnosed americans in-depth lung cancer information symptoms stages	health	webmd lung cancer default webmd lung cancer health center lung cancer lung cancer diagnosed americans depth lung cancer symptoms stages	0	0	2	3	5	2	7	7	7	6	5	7	0	12	10	14	4	15	13
hospital doctor news news list section news hospitaldoctor news doctors gmc action performance backlash feared terror plot overseas doctors clocking-in controversy	health	hospital doctor news news list news hospitaldoctor news doctors gmc action performance backlash feared terror plot overseas doctors clocking controversy	0	0	2	3	5	2	0	4	2	10	5	0	6	14	4	0	4	12	4
lungcanceronline lung cancer online comprehensive directory lung cancer information resources patients families	health	lungcanceronline lung cancer online comprehensive directory lung cancer resources patients families	0	0	2	3	5	2	7	7	7	6	5	7	0	12	8	14	4	15	13
sciam article alias hospital doctor visits chanid modsrc reuters hospital doctor visits balloon survey scientific hospital doctor visits united surged percent	health	sciam article alias hospital doctor visits chanid modsrc reuters hospital doctor visits balloon survey scientific hospital doctor visits united surged percent	0	0	2	3	5	2	0	4	2	6	5	10	6	4	4	0	4	0	4
doctorsofsarasota doctors hospital sarasota home page -bed acute care facility physician search contact information links information health conditions	health	doctorsofsarasota doctors hospital sarasota bed acute care facility physician search contact links health conditions	0	0	2	3	5	2	0	4	2	6	5	10	6	4	4	0	2	0	4
healthcare informatics healthcare informatics advertisers media planner industry reports news web-first copyright healthcare informatics rights reserved legal	health	healthcare informatics healthcare informatics advertisers media planner industry reports news web copyright healthcare informatics rights reserved legal	0	0	2	3	1	6	0	4	2	6	5	10	8	12	1	0	3	12	18
healthfinder gov healthcare health care healthfinder gov health care consumer decisions doctors prescriptions hospitals care health insurance	health	healthfinder gov healthcare health care healthfinder gov health care consumer decisions doctors prescriptions hospitals care health insurance	0	0	2	3	5	2	7	7	7	6	5	7	6	4	4	0	4	0	4
forbes healthcare healthcare news pharmaceutical news forbes com health care news financial markets coverage personal finance advice tools investing tips forbes affiliated publications	health	forbes healthcare healthcare news pharmaceutical news forbes health care news financial markets coverage personal finance advice tools investing tips forbes affiliated publications	0	0	2	3	5	2	4	5	7	4	8	3	6	14	3	4	3	1	17
npr templates topics topic topicid npr health care news feature articles audio reports blogs podcasts national public radio	health	npr templates topics topic topicid npr health care news feature articles audio reports blogs podcasts national public radio	0	1	3	1	2	6	6	4	2	7	5	7	7	8	14	8	9	15	16
health care careerbuilder health care jobs medical jobs hospital jobs careerbuilder com health care jobs job search careerbuilder leader job search sites access jobs	health	health care careerbuilder health care jobs medical jobs hospital jobs careerbuilder health care jobs job search careerbuilder leader job search sites access jobs	0	0	2	3	5	0	0	4	2	4	5	10	6	4	8	0	4	0	4
bls gov oco cgs health care industry health care jobs— jobs wage salary workers jobs	health	bls gov oco cgs health care industry health care jobs wage salary workers jobs	0	0	2	3	5	0	0	7	2	4	3	10	6	4	8	14	4	0	4
whitehouse gov infocus healthcare health care president commends house action patients bill rights remarks president inova fair oaks hospital remarks president specialty	health	whitehouse gov infocus healthcare health care president commends house action patients bill rights remarks president inova fair oaks hospital remarks president specialty	1	2	3	1	1	6	4	4	2	2	5	10	9	10	3	14	3	8	4
wikipedia wiki health care health care wikipedia encyclopedia health care healthcare prevention treatment management illness preservation mental physical	health	wikipedia wiki health care health care wikipedia encyclopedia health care healthcare prevention treatment management illness preservation mental physical	0	0	2	3	5	2	0	7	7	6	3	7	6	4	8	14	5	0	4
healthyfridge healthy refrigerator door healthy heart healthy eating tips diet heart- healthy eating recipes contests kids adults	health	healthyfridge healthy refrigerator door healthy heart healthy eating tips diet heart healthy eating recipes contests kids adults	0	0	2	3	5	2	7	7	7	5	10	2	4	10	13	15	13	14	0
healthycomputing healthycomputing premier source computer office premier website office ergonomics computer ergonomics information buyer guides setup guides health information wrist pain	health	healthycomputing healthycomputing premier source computer office premier website office ergonomics computer ergonomics buyer guides setup guides health wrist pain	0	0	1	0	3	0	4	6	5	4	8	11	8	7	4	12	15	0	2
cdc gov healthyswimming home cdc healthy swimming recommendations healthy swimming behaviors protect people recreational water illnesses rwis help germs getting	health	cdc gov healthyswimming cdc healthy swimming recommendations healthy swimming behaviors protect people recreational water illnesses rwis germs	0	0	2	3	5	2	7	7	7	5	10	7	4	10	13	15	13	14	0
learntobehealthy learn healthy play games learn dental health eating healthy tobacco hurts body	health	learntobehealthy learn healthy play games learn dental health eating healthy tobacco hurts body	0	0	2	3	5	2	7	7	7	5	10	2	4	10	13	15	13	14	0
edu biosci healthy healthy healthy heart heart healthy life prescription healthy heart advice doctor joel posner	health	biosci healthy healthy healthy heart heart healthy life prescription healthy heart advice doctor joel posner	0	0	2	3	5	2	7	7	7	5	10	2	0	10	13	15	4	14	0
guardian medicine story gmc clears hospital doctor hastened babies deaths gmc clears hospital doctor hastened babies deaths carter guardian hospital consultant helped hasten	health	guardian medicine story gmc clears hospital doctor hastened babies deaths gmc clears hospital doctor hastened babies deaths carter guardian hospital consultant helped hasten	0	0	2	3	5	2	0	4	2	6	5	0	8	14	4	0	4	12	13
healthypet welcome healthypet com pet care resources american animal hospital association veterinarian veterinary clinic animal hospital pets pet care	health	healthypet healthypet pet care resources american animal hospital association veterinarian veterinary clinic animal hospital pets pet care	0	0	2	3	5	2	0	4	2	4	5	10	6	4	4	0	4	0	4
ahealthyme healthy ahealthyme com information health wellness daily health news full-text journal magazine articles personalized newsletters	health	ahealthyme healthy ahealthyme health wellness daily health news text journal magazine articles personalized newsletters	0	0	2	3	5	2	7	7	7	5	10	7	6	10	4	15	4	14	0
healthypalmpilot healthy palmpilot medical resources palm net comprehensive repository health care resources palm	health	healthypalmpilot healthy palmpilot medical resources palm net comprehensive repository health care resources palm	0	0	2	3	5	2	7	7	7	6	3	7	6	10	8	15	4	14	13
healthyfamilies gov california healthy families healthy families cost insurance children teens health dental vision coverage children insurance	health	healthyfamilies gov california healthy families healthy families cost insurance children teens health dental vision coverage children insurance	0	0	2	3	5	2	7	7	7	5	3	7	6	4	8	15	15	0	4
healthywomen women health information national women health information women health topics news discussion health services	health	healthywomen women health national women health women health topics news discussion health services	0	0	2	3	5	2	7	7	7	6	5	7	6	4	8	14	4	14	4
odphp osophs dhhs gov pubs healthy people	health	odphp osophs dhhs gov pubs healthy people	0	0	2	3	5	2	7	7	7	5	11	7	6	4	4	15	15	14	13
healthychoice healthy food manufacturer cooking tips meal plans plus fitness exercise tips health news	health	healthychoice healthy food manufacturer cooking tips meal plans fitness exercise tips health news	0	0	2	3	5	2	7	7	7	5	10	2	4	10	13	15	13	14	0
healthyideas healthy living living healthy lifestyle prevention magazine healthy living tips prevention magazine articles healthy lifestyles living healthy life	health	healthyideas healthy living living healthy lifestyle prevention magazine healthy living tips prevention magazine articles healthy lifestyles living healthy life	0	0	2	3	5	2	7	7	7	5	10	2	4	10	13	15	13	14	0
healthypeople gov healthy people home page healthy people national health promotion disease prevention initiative goals quality healthy life	health	healthypeople gov healthy people healthy people national health promotion disease prevention initiative goals quality healthy life	0	0	2	3	5	2	7	7	7	6	10	7	4	4	4	15	4	14	13
americanheart presenter identifier healthy lifestyle lifestyle habits help risk heart attack learn help heart disease stroke	health	americanheart presenter identifier healthy lifestyle lifestyle habits risk heart attack learn heart disease stroke	0	0	2	3	5	2	7	7	7	5	11	7	0	4	13	14	4	10	13
dietitian ibw ibw dietitian healthy body calculator try healthy weights healthy calories calculator body weight body mass index bmi body frame waist hip ratio	health	dietitian ibw ibw dietitian healthy body calculator healthy weights healthy calories calculator body weight body mass bmi body frame waist hip ratio	0	0	2	3	5	2	7	4	0	5	10	2	4	10	13	15	13	14	0
wikipedia wiki health health wikipedia encyclopedia physical fitness weight loss healthy diet stress management wellness psychological healthy	health	wikipedia wiki health health wikipedia encyclopedia physical fitness weight loss healthy diet stress management wellness psychological healthy	0	0	2	3	5	2	7	7	7	5	10	2	4	10	13	15	13	14	0
kidshealth kid stay healthy staying healthy care body eat healthy stay fit click topics feelings staying healthy recipes	health	kidshealth kid stay healthy staying healthy care body eat healthy stay fit click topics feelings staying healthy recipes	0	0	2	3	5	2	7	7	7	5	10	2	4	10	13	15	13	14	0
healthy healthworld online home self-managed care healthy living healthworld online leading resource healthy living therapies bodymindspirit health focusing self-managed care global	health	healthy healthworld online managed care healthy living healthworld online leading resource healthy living therapies bodymindspirit health focusing managed care global	0	0	2	3	5	2	7	7	7	5	10	7	4	10	4	15	4	14	13
healthypeople gov about healthy people healthy people prevention agenda nation statement national health objectives designed	health	healthypeople gov healthy people healthy people prevention agenda nation statement national health objectives designed	0	0	2	3	5	2	7	7	7	6	10	7	4	4	4	15	15	14	13
mayoclinic health lung cancer lung cancer mayoclinic com lung cancer cause cancer deaths preventable	health	mayoclinic health lung cancer lung cancer mayoclinic lung cancer cancer deaths preventable	0	0	2	3	5	2	7	7	7	6	5	7	0	12	8	14	4	15	13
lungusa dvluk lung cancer american lung association lung cancer leading cancer killer women lung cancer deaths lung cancer	health	lungusa dvluk lung cancer american lung association lung cancer leading cancer killer women lung cancer deaths lung cancer	0	0	2	3	5	2	7	7	7	6	5	7	0	12	8	14	4	15	13
nlm nih gov medlineplus lungcancer medlineplus lung cancer lung cancer cancers world leading cause cancer death women united	health	nlm nih gov medlineplus lungcancer medlineplus lung cancer lung cancer cancers leading cancer death women united	0	0	2	3	5	2	7	7	7	6	5	7	0	12	10	14	5	15	13
allnurses nursing nursing community nurses nursing students talk nursing	health	allnurses nursing nursing community nurses nursing students talk nursing	0	0	2	3	5	2	0	4	2	10	3	5	6	4	8	5	2	0	4
answers topic nurse nurse definition synonyms answers com nurse educated trained care sick disabled woman employed care child nursemaid	health	answers topic nurse nurse definition synonyms answers nurse educated trained care sick disabled woman employed care child nursemaid	0	0	2	3	5	2	0	7	2	6	3	5	6	4	8	5	2	0	4
nursingworld american nurses association web nursingworld website american nurses association world nursing fingertips certification	health	nursingworld american nurses association web nursingworld website american nurses association nursing fingertips certification	0	0	2	3	5	2	0	4	2	4	3	5	6	3	8	5	2	0	4
princetonreview cte profiles dayinlife careerid nurse nurses help disease injury care sick injured parameters limits job entail	health	princetonreview cte profiles dayinlife careerid nurse nurses disease injury care sick injured parameters limits job entail	0	0	2	3	5	2	0	7	2	6	3	5	6	4	8	5	2	0	4
discovernursing discover nursing features information getting basics field finding nursing programs questions profiles nurses scholarship search	health	discovernursing discover nursing features basics field finding nursing programs questions profiles nurses scholarship search	0	0	2	3	5	2	0	7	2	10	3	10	6	4	8	5	2	0	4
nursing about nursing nursing resources news information humor inspiration nurses student nurses retired nurses	health	nursing nursing nursing resources news humor inspiration nurses student nurses retired nurses	0	0	2	3	5	2	0	4	2	10	3	5	6	4	8	5	2	0	4
wikipedia wiki nursing nursing wikipedia encyclopedia nursing profession focused assisting families communities maintaining recovering optimal health functioning	health	wikipedia wiki nursing nursing wikipedia encyclopedia nursing profession focused assisting families communities maintaining recovering optimal health functioning	0	0	2	3	5	2	0	7	2	6	3	10	6	4	8	5	2	0	4
wikipedia wiki nurse nurse wikipedia encyclopedia nurse health care professional engaged practice nursing nurses responsible—along health care professionals—for	health	wikipedia wiki nurse nurse wikipedia encyclopedia nurse health care professional engaged practice nursing nurses health care	0	0	2	3	5	2	0	7	2	6	3	5	6	4	8	5	2	0	4
bls gov help nurse nurses nurses rns care sick injured people people medicine treat wounds	health	bls gov nurse nurses nurses rns care sick injured people people medicine treat wounds	0	0	2	3	5	2	0	7	2	6	3	7	6	4	8	5	2	0	4
bls gov oco ocos nurses educational paths nursing bachelor degree associate degree diploma approved nursing program	health	bls gov oco ocos nurses educational paths nursing bachelor degree associate degree diploma approved nursing program	0	0	2	3	5	2	0	4	2	4	3	10	6	4	8	5	2	0	4
nurse nurse com nurse com page nursing news careers education nurse com rns rns premier destination nurses publishers nursing spectrum nurseweek	health	nurse nurse nurse nursing news careers education nurse rns rns premier destination nurses publishers nursing spectrum nurseweek	0	0	2	3	5	2	0	7	2	10	3	5	6	4	8	5	2	0	4
sniksnak cathealth cat health information condition disease pawprints resourceful pages devoted feline health care disease condition	health	sniksnak cathealth cat health condition disease pawprints resourceful devoted feline health care disease condition	0	0	2	3	5	2	7	7	7	6	3	7	0	4	4	14	4	0	13
dhfs wisconsin gov statehealthplan conditions health plan tracking health conditions key activity data-guided process stakeholders priority health conditions process	health	dhfs wisconsin gov statehealthplan conditions health plan tracking health conditions key activity data guided process stakeholders priority health conditions process	0	0	2	3	5	2	7	7	7	5	5	10	0	4	4	5	4	14	13
cybernurse links nurse nurses nurses shared computing internet nurse direction	health	cybernurse links nurse nurses nurses shared computing internet nurse direction	0	0	2	3	5	2	0	7	2	10	3	5	6	4	8	5	2	0	4
lifescript channels healthy living health conditions index health condition articles health symptoms condition treatment articles health conditions health symptoms health condition treatments lifescript com	health	lifescript channels healthy living health conditions health condition articles health symptoms condition treatment articles health conditions health symptoms health condition treatments lifescript	0	0	2	3	5	2	7	7	7	6	3	7	0	4	4	14	4	14	13
ahrq gov consumer health care consumers patients index page consumer health patient information health plans insurance prescriptions conditions diseases surgery quality care quitting smoking	health	ahrq gov consumer health care consumers patients consumer health patient health plans insurance prescriptions conditions diseases surgery quality care quitting smoking	0	0	2	3	5	2	7	7	7	6	5	7	6	4	4	14	4	0	4
revolutionhealth drugs treatments drugs treatments revolution health conditions treatments directory trusted brad revolution health leading expert	health	revolutionhealth drugs treatments drugs treatments revolution health conditions treatments directory trusted brad revolution health leading expert	0	0	2	3	5	2	7	7	7	5	11	7	0	4	10	14	4	10	13
webmd sexual conditions webmd sexual conditions health center sexual advice birth control options std information sexual health news	health	webmd sexual conditions webmd sexual conditions health center sexual advice birth control options std sexual health news	0	0	2	3	5	2	7	7	7	6	3	7	0	4	4	14	4	14	13
dir yahoo health diseases and conditions diseases conditions yahoo directory diseases conditions email page search directory health diseases conditions	health	dir yahoo health diseases conditions diseases conditions yahoo directory diseases conditions email search directory health diseases conditions	0	0	2	3	5	2	7	7	7	6	3	7	0	4	4	14	4	14	13
men webmd default webmd health center health topics information consumer health information regarding conditions	health	webmd default webmd health center health topics consumer health conditions	0	0	2	3	5	2	7	7	7	6	5	7	0	4	4	14	4	14	13
dol gov dol allcfr esa title part cfr cfr health condition health condition treatment health care provider period incapacity	health	dol gov dol allcfr esa title cfr cfr health condition health condition treatment health care provider period incapacity	0	0	2	3	5	2	7	7	7	6	3	7	0	4	8	14	4	0	13
obgyn women conditions conditions obgyn net health conditions medical procedures obgyn net medical professionals page daily news events calendar clinical information links sections articles	health	obgyn women conditions conditions obgyn net health conditions medical procedures obgyn net medical professionals daily news events calendar clinical links sections articles	0	0	2	3	5	2	7	7	7	6	3	7	6	4	8	14	2	14	13
revolutionhealth conditions revolution health conditions revolution health trusted source medical conditions treatments information covering symptoms causes risks treatments	health	revolutionhealth conditions revolution health conditions revolution health trusted source medical conditions treatments covering symptoms risks treatments	0	0	2	3	5	2	7	7	7	5	11	7	0	4	10	14	4	10	13
google top health conditions and diseases google directory health conditions diseases kids teens health conditions diseases shopping health conditions diseases society disabled	health	google top health conditions diseases google directory health conditions diseases kids teens health conditions diseases shopping health conditions diseases society disabled	0	0	2	3	5	2	7	7	7	6	3	7	0	4	4	14	4	14	13
csmc edu health conditions welcome health conditions section conditions treated cedars-sinai medical experts check	health	csmc health conditions health conditions conditions treated cedars sinai medical experts check	0	0	2	3	5	2	7	7	7	6	3	7	0	4	10	14	4	14	13
nlm nih gov medlineplus healthtopics medlineplus health topics disorders conditions cancers genetics birth defects infections injuries wounds mental health behavior metabolic poisoning	health	nlm nih gov medlineplus healthtopics medlineplus health topics disorders conditions cancers genetics birth defects infections injuries wounds mental health behavior metabolic poisoning	0	0	2	3	5	2	7	7	7	6	3	7	0	4	10	14	5	0	13
women webmd default webmd women health center women health topics consumer health women health conditions	health	women webmd default webmd women health center women health topics consumer health women health conditions	0	0	2	3	5	2	7	7	7	6	5	7	0	4	4	14	4	14	13
webmd guides common topics default webmd health topics reliable health medical guide reliable health information topics search drugs brand condition	health	webmd guides common topics default webmd health topics reliable health medical guide reliable health topics search drugs brand condition	0	0	2	3	5	2	7	7	7	6	3	7	0	4	4	14	4	14	13
health discovery encyclopedias encyclopedias discovery health diseases conditions database diseases conditions database learn causes diagnosis treatments illnesses	health	health discovery encyclopedias encyclopedias discovery health diseases conditions database diseases conditions database learn diagnosis treatments illnesses	0	0	2	3	5	2	7	7	7	6	3	7	0	4	4	14	4	14	13
nurse orgs shtml nurse org nursing organizations nurse practitioner association rochester nurse practitioner arnp care nurse practitioner newsletter	health	nurse orgs shtml nurse org nursing organizations nurse practitioner association rochester nurse practitioner arnp care nurse practitioner newsletter	0	0	2	3	5	2	0	7	2	10	3	5	6	4	8	5	2	0	4
nurse welcome nurse org nursing nursing ethics organizations secret grow org information	health	nurse nurse org nursing nursing ethics organizations secret grow org	0	0	2	3	5	2	0	7	2	10	3	5	6	4	8	5	2	0	4
bhpr hrsa gov nursing nursing hrsa nursing programs address nation nurse shortage nurse education practice retention	health	bhpr hrsa gov nursing nursing hrsa nursing programs address nation nurse shortage nurse education practice retention	0	0	2	3	5	2	0	7	2	4	3	5	6	4	8	5	2	0	4
medicinenet lung cancer article lung cancer information symptoms diagnosis treatment medical information lung cancer diagnosis treatment lung cancer	health	medicinenet lung cancer article lung cancer symptoms diagnosis treatment medical lung cancer diagnosis treatment lung cancer	0	0	2	3	5	2	7	7	7	6	5	7	0	12	10	14	4	15	13
cancer gov cancertopics types lung lung cancer home page national cancer institute information lung cancer treatment prevention causes screening clinical trials research statistics topics national cancer	health	cancer gov cancertopics types lung lung cancer national cancer institute lung cancer treatment prevention screening clinical trials statistics topics national cancer	0	0	2	3	5	2	7	7	7	6	5	7	0	12	8	14	4	15	13
wikipedia wiki lung cancer lung cancer wikipedia encyclopedia lung cancer malignant transformation expansion lung tissue responsible deaths annually	health	wikipedia wiki lung cancer lung cancer wikipedia encyclopedia lung cancer malignant transformation expansion lung tissue responsible deaths annually	0	0	2	3	5	2	7	7	7	6	5	7	0	12	8	14	5	15	13
lungcancer welcome lung cancer org build public awareness lung cancer national cancer organizations uniting launch nationwide lung cancer awareness campaign	health	lungcancer lung cancer org build public awareness lung cancer national cancer organizations uniting launch nationwide lung cancer awareness campaign	0	0	2	3	5	2	7	7	7	6	5	7	0	12	8	14	4	15	13
topix health hiv aids hiv aids news topix news hiv aids continually updated net	health	topix health hiv aids hiv aids news topix news hiv aids continually updated net	0	0	2	3	5	2	7	7	7	6	11	7	4	4	8	14	5	15	15
unicef aids unicef hiv aids children introduction united nations children fund unicef children rights survival development protection guided convention	health	unicef aids unicef hiv aids children introduction united nations children fund unicef children rights survival development protection guided convention	1	0	2	1	1	0	6	7	3	9	11	5	4	4	2	3	15	15	15
aidsinfo nih gov aidsinfo hiv aids treatment information information federally approved treatment guidelines hiv aids	health	aidsinfo nih gov aidsinfo hiv aids treatment federally approved treatment guidelines hiv aids	0	0	2	3	5	2	7	7	7	6	11	7	4	4	10	14	5	15	15
sis nlm nih gov hiv hivmain hiv aids information	health	sis nlm nih gov hiv hivmain hiv aids	0	0	2	3	5	2	7	7	7	6	11	7	4	4	10	14	5	15	15
talkingwithkids aids talking kids hiv aids kids hearing hiv aids learning inaccurate frightening record straight	health	talkingwithkids aids talking kids hiv aids kids hearing hiv aids learning inaccurate frightening record straight	0	0	2	3	5	2	7	7	7	6	11	7	4	4	10	14	5	15	15
kidshealth kid health problems infection hiv hiv aids people don hiv aids mean hear words	health	kidshealth kid health infection hiv hiv aids people don hiv aids hear	0	0	2	3	5	2	7	7	7	6	11	7	4	4	10	14	5	15	15
webmd hiv aids default webmd hiv aids health center hiv aids information cdc people living hiv aids hiv aids information	health	webmd hiv aids default webmd hiv aids health center hiv aids cdc people living hiv aids hiv aids	0	0	2	3	5	2	7	7	7	6	11	7	4	4	10	14	5	15	15
medicalnewstoday sections hiv aids hiv news aids news medical news hiv aids news headlines published daily	health	medicalnewstoday sections hiv aids hiv news aids news medical news hiv aids news headlines published daily	0	0	2	3	5	2	7	7	7	6	11	7	4	4	8	14	5	15	15
worldbank aids aids hiv aids health world realize development threatens human welfare socio-economic	health	worldbank aids aids hiv aids health realize development threatens human welfare socio economic	0	0	2	3	1	3	6	7	7	9	11	7	4	4	10	14	5	15	15
hrw campaigns aids human rights watch hiv aids human rights aids epidemic devastating crisis history human health product exacerbated pervasive violations human	health	hrw campaigns aids human rights watch hiv aids human rights aids epidemic devastating crisis history human health product exacerbated pervasive violations human	0	0	2	3	1	0	6	7	7	9	11	11	4	4	10	14	5	15	15
aegis aids education global information system aegis aegis hiv aids databases world hiv daily briefing updated hourly	health	aegis aids education global system aegis aegis hiv aids databases hiv daily briefing updated hourly	0	0	2	3	5	2	7	7	7	6	11	7	4	4	8	14	5	15	15
undp hiv undp hiv aids undp spread hiv aids impact trusted development partner co-sponsor unaids helps countries	health	undp hiv undp hiv aids undp spread hiv aids impact trusted development partner sponsor unaids helps countries	0	0	2	3	1	0	7	7	7	9	11	7	4	4	10	14	5	15	15
emedicinehealth hivaids article hiv aids hiv human immunodeficiency virus infection spread country world infected people	health	emedicinehealth hivaids article hiv aids hiv human immunodeficiency virus infection spread country infected people	0	0	2	3	5	2	7	7	7	6	11	7	4	4	10	14	5	15	15
kidshealth teen infections stds std hiv hiv aids cure aids prevention hiv aids affects body treated	health	kidshealth teen infections stds std hiv hiv aids cure aids prevention hiv aids body treated	0	0	2	3	5	2	7	7	7	6	11	7	4	4	10	14	5	15	15
who int hiv hiv aids office global aids coordinator ogac convened meeting task shifting context hiv aids	health	int hiv hiv aids office global aids coordinator ogac convened meeting task shifting context hiv aids	0	0	2	3	5	2	7	7	7	6	11	7	4	4	10	14	5	15	15
mayoclinic health hiv aids hiv aids mayoclinic com hiv aids comprehensive overview covers symptoms treatment prevention deadly infection	health	mayoclinic health hiv aids hiv aids mayoclinic hiv aids comprehensive overview covers symptoms treatment prevention deadly infection	0	0	2	3	5	2	7	7	7	6	11	7	4	4	10	14	5	15	15
wikipedia wiki aids aids wikipedia encyclopedia joint united nations programme hiv aids unaids hiv aids retard economic growth destroying human capital	health	wikipedia wiki aids aids wikipedia encyclopedia joint united nations programme hiv aids unaids hiv aids retard economic growth destroying human capital	0	0	2	3	1	0	6	7	7	9	11	7	4	4	10	14	5	15	15
thebody body hiv aids resource comprehensive featuring in-depth information topics ranging hiv prevention state-of-the-art treatment issues forums humor	health	thebody body hiv aids resource comprehensive featuring depth topics ranging hiv prevention art treatment issues forums humor	0	0	2	3	5	2	7	7	7	6	11	7	4	4	10	14	5	15	15
cdc gov hiv cdc hiv aids guide designed parents adults covers discussing hiv infection aids people teens	health	cdc gov hiv cdc hiv aids guide designed parents adults covers discussing hiv infection aids people teens	0	0	2	3	5	2	7	7	7	6	11	7	4	4	10	14	5	15	15
cdc gov hiv pubs facts factsheets cdc hiv aids listing hiv aids sheets cdc hiv aids science male circumcision risk hiv transmission implications united	health	cdc gov hiv pubs factsheets cdc hiv aids listing hiv aids sheets cdc hiv aids science male circumcision risk hiv transmission implications united	0	0	2	3	5	2	7	7	7	6	11	7	4	4	10	14	5	15	15
nursing about studentnurses becomeanurse nurse nurse career ladder education options aspire nurses	health	nursing studentnurses becomeanurse nurse nurse career ladder education options aspire nurses	0	0	2	3	5	2	0	7	2	10	3	5	6	4	8	5	2	0	4
nursesource orthopaedic nurses healthier tomorrow orthopaedic nursing roots victorian england specialty matriarch dame agnes hunt crippled septic arthritis hip	health	nursesource orthopaedic nurses healthier tomorrow orthopaedic nursing roots victorian england specialty matriarch dame agnes hunt crippled septic arthritis hip	0	0	2	3	5	2	0	4	2	4	3	5	6	3	8	5	2	0	4
nursesource staff nurses healthier tomorrow nurses segment nation health care professionals numbering majority staff	health	nursesource staff nurses healthier tomorrow nurses segment nation health care professionals numbering majority staff	0	0	2	3	5	2	0	4	2	4	3	5	6	4	8	5	2	0	4
nurse newjersey nurse com jersey nursing news careers education forums public respects nurses annual gallup poll professional honesty ethics rates nursing profession	health	nurse newjersey nurse jersey nursing news careers education forums public respects nurses annual gallup poll professional honesty ethics rates nursing profession	0	0	2	3	5	2	0	7	2	10	3	5	6	4	8	5	2	0	4
nursingcenter nursing center gateway online resources journals education career information discussion forums nursingcenter portal	health	nursingcenter nursing center gateway online resources journals education career discussion forums nursingcenter portal	0	0	2	3	5	2	0	4	2	6	3	10	6	4	4	0	2	0	4
streetdrugs www streetdrugs org database drug information parents teachers students dare officers learning illegal drugs	health	streetdrugs streetdrugs org database drug parents teachers students dare officers learning illegal drugs	0	0	2	3	5	2	7	7	7	6	11	11	8	4	10	5	5	15	15
druginfonet drug infonet newsfeed drug infonet one-stop www healthcare informational information links web	health	druginfonet drug infonet newsfeed drug infonet healthcare informational links web	0	0	2	3	5	2	0	7	2	6	3	11	8	12	8	0	15	0	15
accessdata fda gov scripts cder drugsatfda drugs fda searchable catalog fda approved drug products prescription counter database information therapeutic equivalents	health	accessdata fda gov scripts cder drugsatfda drugs fda searchable catalog fda approved drug products prescription counter database therapeutic equivalents	0	0	2	3	5	2	7	7	7	6	3	11	8	7	4	15	15	0	13
druglibrary drcnet online library drug policy online library articles reasearch papers books essays drugs drug policy prohibition controlled substances drug abuse drug war	health	druglibrary drcnet online library drug policy online library articles reasearch papers books essays drugs drug policy prohibition controlled substances drug abuse drug war	0	0	2	3	5	2	7	7	7	6	3	11	8	7	4	15	15	0	15
weight loss institute diet pills diet pills sale compare diet pills phentermine xenical bontril meridia	health	weight loss institute diet pills diet pills sale compare diet pills phentermine xenical bontril meridia	0	0	2	3	5	2	7	4	0	5	10	2	4	10	13	15	13	14	0
southbeachdiet lose weight south beach diet online web diet features discussions author recipes nutritional information weight tracker tools	health	southbeachdiet lose weight south beach diet online web diet features discussions author recipes nutritional weight tracker tools	0	0	2	3	5	2	7	7	7	5	10	2	4	10	13	15	13	14	0
thedietchannel weight loss diets nutrition exercise diet channel expert advice lose weight eat healthy stay fit diet plans community	health	thedietchannel weight loss diets nutrition exercise diet channel expert advice lose weight eat healthy stay fit diet plans community	0	0	2	3	5	2	7	7	7	5	10	2	4	10	13	15	13	14	0
wikipedia wiki diet japan diet japan wikipedia encyclopedia national diet japan kokkai japan legislature houses house representatives house councillors	health	wikipedia wiki diet japan diet japan wikipedia encyclopedia national diet japan kokkai japan legislature houses house representatives house councillors	1	2	3	1	1	0	4	1	0	9	4	3	3	8	0	13	12	8	3
wikipedia wiki diet diet wikipedia encyclopedia diet nutrition sum food consumed organism diet food foods aid dieting diet mean	health	wikipedia wiki diet diet wikipedia encyclopedia diet nutrition sum food consumed organism diet food foods aid dieting diet	0	0	2	3	5	2	7	7	7	5	10	2	4	10	13	15	13	14	0
atkins atkins atkins web information atkins low-carb eating plan recipes shopping	health	atkins atkins atkins web atkins low carb eating plan recipes shopping	0	0	2	3	5	2	7	7	7	5	10	2	4	10	13	15	13	14	0
webmd diet health diet center- healthy eating diet plans tips healthy diet plans helpful weight loss tools diet news information	health	webmd diet health diet center healthy eating diet plans tips healthy diet plans helpful weight loss tools diet news	0	0	2	3	5	2	7	7	7	5	10	2	4	10	13	15	13	14	0
ediets diet plans weight loss programs mediterranean diet diet personally designed diet plans articles	health	ediets diet plans weight loss programs mediterranean diet diet personally designed diet plans articles	0	0	2	3	5	2	7	7	7	5	10	2	4	10	13	15	13	14	0
topics nytimes top news health diseasesconditionsandhealthtopics diet index inline nyt classifier diet nutrition health articles multimedia diet nutrition weight obesity dieting collection articles diet nutrition published	health	topics nytimes top news health diseasesconditionsandhealthtopics diet inline nyt classifier diet nutrition health articles multimedia diet nutrition weight obesity dieting collection articles diet nutrition published	0	0	2	3	5	2	7	7	7	5	10	7	6	4	4	15	4	14	13
diet diet com diet diet com expert guidance diet tips podcasts videos	health	diet diet diet diet expert guidance diet tips podcasts videos	0	0	2	3	5	2	7	7	7	5	10	2	4	10	13	15	13	14	0
women gov faq hepatitis viral hepatitis hepatitis liver inflammation viral hepatitis liver inflammation virus viral infection liver liver	health	women gov faq hepatitis viral hepatitis hepatitis liver inflammation viral hepatitis liver inflammation virus viral infection liver liver	0	0	2	3	5	2	7	7	7	6	11	7	0	4	10	14	5	15	13
topics nytimes top news health diseasesconditionsandhealthtopics hepatitis index inline nyt classifier hepatitis health news york collection articles hepatitis published york	health	topics nytimes top news health diseasesconditionsandhealthtopics hepatitis inline nyt classifier hepatitis health news york collection articles hepatitis published york	0	0	2	3	5	2	7	7	7	5	11	7	0	4	4	14	4	14	13
herpes coldsores std hepatitis hepatitis information pictures information pictures hepatitis sexually transmitted diseases information symptoms diagnosis treatment	health	herpes coldsores std hepatitis hepatitis pictures pictures hepatitis sexually transmitted diseases symptoms diagnosis treatment	0	0	2	3	5	2	7	7	7	6	11	7	0	4	10	14	5	15	13
smartdiets info coupons nutrisystem nutrisystem coupons nutrisystem nourish diet nutri system nutrisystem coupons help save nutri system nourish meals food nutrisystem diet plan reviewed excellent weight loss	health	smartdiets info coupons nutrisystem nutrisystem coupons nutrisystem nourish diet nutri system nutrisystem coupons save nutri system nourish meals food nutrisystem diet plan reviewed excellent weight loss	0	0	2	3	5	2	7	7	0	5	10	2	4	10	13	15	13	14	0
wikipedia wiki hepatitis hepatitis wikipedia encyclopedia hepatitis infectious hepatitis acute infectious liver disease hepatovirus hepatitis virus	health	wikipedia wiki hepatitis hepatitis wikipedia encyclopedia hepatitis infectious hepatitis acute infectious liver disease hepatovirus hepatitis virus	0	0	2	3	5	2	7	7	7	6	11	7	0	4	10	14	5	15	13
hepnet hepatitis information network hepnet hepnet hepatitis resource updates patient care issues clinical papers news releases	health	hepnet hepatitis network hepnet hepnet hepatitis resource updates patient care issues clinical papers news releases	0	0	2	3	5	2	7	7	7	6	11	7	0	4	4	14	5	15	13
emedicinehealth hepatitis article hepatitis consumer health resource center information causes symptoms treatment hepatitis	health	emedicinehealth hepatitis article hepatitis consumer health resource center symptoms treatment hepatitis	0	0	2	3	5	2	7	7	7	6	11	7	0	4	10	14	5	15	13
labtestsonline understanding conditions hep hepatitis overview hepatitis causes tests detect	health	labtestsonline understanding conditions hep hepatitis overview hepatitis tests detect	0	0	2	3	5	2	7	7	7	6	11	7	0	4	10	14	5	15	13
nlm nih gov medlineplus ency article medlineplus medical encyclopedia hepatitis hepatitis resolve acute hepatitis cause disease chronic hepatitis instances progressive liver damage	health	nlm nih gov medlineplus ency article medlineplus medical encyclopedia hepatitis hepatitis resolve acute hepatitis disease chronic hepatitis instances progressive liver damage	0	0	2	3	5	2	7	7	7	6	11	7	0	4	10	14	5	15	13
cdc gov ncidod diseases hepatitis index hepatitis index cdc viral hepatitis hepatitis hepatitis liver disease hepatitis virus hepatitis affect united hepatitis	health	cdc gov ncidod diseases hepatitis hepatitis cdc viral hepatitis hepatitis hepatitis liver disease hepatitis virus hepatitis affect united hepatitis	0	0	2	3	5	2	7	7	7	6	11	7	0	4	10	14	5	15	13
answers topic hepatitis hepatitis definition answers com hep·a·ti·tis -tit·i·des inflammation liver infectious toxic agents characterized jaundice fever liver	health	answers topic hepatitis hepatitis definition answers inflammation liver infectious toxic agents characterized jaundice fever liver	0	0	2	3	5	2	7	7	7	6	11	7	0	4	10	14	5	15	13
google top health conditions and diseases digestive disorders liver hepatitis google directory health conditions diseases digestive description hepatitis a-e links information news hepatitis collected web	health	google top health conditions diseases digestive disorders liver hepatitis google directory health conditions diseases digestive description hepatitis links news hepatitis collected web	0	0	2	3	5	2	7	7	7	6	11	7	0	4	4	14	5	14	13
hepatitis about hepatitis wealth information hepatitis viral hepatitis autoimmune hepatitis treatments self-care prevention	health	hepatitis hepatitis wealth hepatitis viral hepatitis autoimmune hepatitis treatments care prevention	0	0	2	3	5	2	7	7	7	6	11	7	0	4	10	14	5	15	13
hepatitis hepatitis org index hepatitis information channel hepatitis liver diseases issues english dutch french german versions description	health	hepatitis hepatitis org hepatitis channel hepatitis liver diseases issues english dutch french german versions description	0	0	2	3	5	2	7	7	7	6	11	7	0	4	10	14	5	14	13
webmd hepatitis default webmd hepatitis health center hepatitis information hepatitis viral infections affect americans in-depth hepatitis information hepatitis	health	webmd hepatitis default webmd hepatitis health center hepatitis hepatitis viral infections affect americans depth hepatitis hepatitis	0	0	2	3	5	2	7	7	7	6	11	7	0	4	10	14	5	15	13
cdc gov mill sjlibrary ncidod diseases hepatitis index cdc viral hepatitis hepatitis affect united hepatitis situations ranging isolated disease epidemics	health	cdc gov mill sjlibrary ncidod diseases hepatitis cdc viral hepatitis hepatitis affect united hepatitis situations ranging isolated disease epidemics	0	0	2	3	5	2	7	7	7	6	11	7	0	4	10	14	5	15	13
nlm nih gov medlineplus hepatitis medlineplus hepatitis hepatitis swelling liver lead scarring cirrhosis cancer	health	nlm nih gov medlineplus hepatitis medlineplus hepatitis hepatitis swelling liver lead scarring cirrhosis cancer	0	0	2	3	5	2	7	7	7	6	11	7	0	4	10	14	5	15	13
cdc gov ncidod diseases hepatitis index cdc viral hepatitis description hepatitis links information	health	cdc gov ncidod diseases hepatitis cdc viral hepatitis description hepatitis links	0	0	2	3	5	2	7	7	7	6	11	7	0	4	10	14	5	15	13
avert hepatitis hepatitis hepatitis hepatitis symptoms treatment overview symptoms diagnosis treatment hepatitis hepatitis hepatitis	health	avert hepatitis hepatitis hepatitis hepatitis symptoms treatment overview symptoms diagnosis treatment hepatitis hepatitis hepatitis	0	0	2	3	5	2	7	7	7	6	11	7	0	4	10	14	5	15	13
wikipedia wiki hepatitis hepatitis wikipedia encyclopedia wikipedia article disease causes symptoms treatment references links	health	wikipedia wiki hepatitis hepatitis wikipedia encyclopedia wikipedia article disease symptoms treatment references links	0	0	2	3	5	2	7	7	7	6	11	7	0	4	10	14	5	15	13
dietpolicy diet plans dietary supplement information exceptional deals information diet dieting tips plans dieting guide fit	health	dietpolicy diet plans dietary supplement exceptional deals diet dieting tips plans dieting guide fit	0	0	2	3	5	2	7	7	7	5	10	2	4	10	13	15	13	14	0
diet blog diet blog diet blog readers puzzled science inaccurate beats superstition wishful	health	diet blog diet blog diet blog readers puzzled science inaccurate beats superstition wishful	0	0	2	3	5	2	7	7	7	5	10	2	4	10	13	15	13	14	0
fitnessmagazine fitness magazine home page fitness beauty wellness food topics recipe finder email newsletter	health	fitnessmagazine fitness magazine fitness beauty wellness food topics recipe finder email newsletter	0	0	2	3	5	2	7	7	7	5	10	7	6	10	4	15	13	14	0
fitness fitness equipment workout fitness program fitness articles fitness equipment workout fitness fitness forum fitness program fitness fitness articles beauty fitness weight loss weight training	health	fitness fitness equipment workout fitness program fitness articles fitness equipment workout fitness fitness forum fitness program fitness fitness articles beauty fitness weight loss weight training	0	0	2	3	5	2	7	7	7	5	10	2	6	10	13	15	13	14	0
mclean harvard edu patient mclean hospital patient care mclean hospital harvard medical school affiliate mclean hospital home page patients advice patient care education research	health	mclean harvard patient mclean hospital patient care mclean hospital harvard medical school affiliate mclean hospital patients advice patient care education	0	0	2	3	5	2	0	4	2	6	5	10	6	4	4	0	2	0	4
ajc metro content metro dekalb stories speaker patient hospital georgia ajc com globe-trotting tuberculosis patient andrew speaker released isolation denver hospital morning georgia	health	ajc metro content metro dekalb stories speaker patient hospital georgia ajc globe trotting tuberculosis patient andrew speaker released isolation denver hospital morning georgia	0	0	2	2	5	2	0	4	2	6	5	12	8	4	4	0	4	12	4
cnn health conditions arizona patient index arizona patient transferred denver hospital cnn com quarantined drug-resistant tuberculosis transferred hospital colorado	health	cnn health conditions arizona patient arizona patient transferred denver hospital cnn quarantined drug resistant tuberculosis transferred hospital colorado	0	0	2	3	5	2	0	4	2	6	5	12	8	4	4	0	4	12	4
azdhs gov azsh library arizona hospital patient medical library patient library information civil hospital library reading materials timely journals leisure education	health	azdhs gov azsh library arizona hospital patient medical library patient library civil hospital library reading materials timely journals leisure education	0	0	2	3	5	2	0	4	2	6	3	10	8	4	4	0	2	0	4
jointcommission patientsafety nationalpatientsafetygoals hap cah npsgs hospital critical access hospital national patient safety national patient safety goals critical access hospital version manual chapter implementation expectations	health	jointcommission patientsafety nationalpatientsafetygoals hap cah npsgs hospital critical access hospital national patient safety national patient safety goals critical access hospital version manual chapter implementation expectations	0	0	2	3	5	2	0	4	2	6	5	10	6	4	4	0	2	0	4
news aol story tuberculosis patient flees hospital story tuberculosis patient flees hospital aol news rock ark isolation diagnosed contagious tuberculosis broke hospital window fled	health	news aol story tuberculosis patient flees hospital story tuberculosis patient flees hospital aol news rock ark isolation diagnosed contagious tuberculosis broke hospital window fled	0	0	2	3	5	2	0	4	2	6	5	12	8	4	4	0	4	12	13
massgeneral medical treatment physician patient information- mass mgh physicians specialize patient care treatment diseases health issues mgh teaching research hospital	health	massgeneral medical treatment physician patient mass mgh physicians specialize patient care treatment diseases health issues mgh teaching hospital	0	0	2	3	5	2	0	7	7	6	3	10	8	4	10	14	5	0	13
govhealthit article web government health news hhs post hospital patient mortality hhs post hospital patient mortality data online project government enhance consumer medical care rating	health	govhealthit article web government health news hhs post hospital patient mortality hhs post hospital patient mortality data online project government enhance consumer medical care rating	0	0	2	3	5	2	0	4	2	6	5	10	6	4	4	0	4	0	4
news yahoo tuberculosis infection patient released hospital yahoo news tuberculosis patient international health scare flew europe wedding released hospital	health	news yahoo tuberculosis infection patient released hospital yahoo news tuberculosis patient international health scare flew europe wedding released hospital	0	0	2	2	5	2	0	4	2	6	5	12	8	4	4	0	4	12	4
azcentral news articles tbpatient patient moved colorado hospital patient moved colorado hospital patient jail phoenix hospital flown colorado	health	azcentral news articles tbpatient patient moved colorado hospital patient moved colorado hospital patient jail phoenix hospital flown colorado	0	0	2	3	5	2	0	4	2	6	5	12	8	4	4	0	4	12	4
msnbc msn quarantined patient flees hospital infectious diseases isolation diagnosed contagious tuberculosis broke hospital window fled health officials	health	msnbc msn quarantined patient flees hospital infectious diseases isolation diagnosed contagious tuberculosis broke hospital window fled health officials	0	0	2	3	5	2	0	4	2	6	5	12	8	4	4	0	4	12	13
diet lovetoknow wiki online diets carb diet plan welcome diet lovetoknow love diet plans information healthy	health	diet lovetoknow wiki online diets carb diet plan diet lovetoknow love diet plans healthy	0	0	2	3	5	2	7	7	7	5	10	2	4	10	13	15	13	14	0
nytimes health dignity hospital degrading shift patient medical system courtesies life neglected	health	nytimes health dignity hospital degrading shift patient medical system courtesies life neglected	0	0	2	3	5	2	0	4	2	6	5	10	6	4	4	14	2	0	4
cbsnews stories health shtml tuberculosis patient hospital andrew speaker released andrew speaker tuberculosis patient sparked international public health scare released national jewish hospital	health	cbsnews stories health shtml tuberculosis patient hospital andrew speaker released andrew speaker tuberculosis patient sparked international public health scare released national jewish hospital	0	0	2	2	5	2	0	4	2	6	5	12	8	4	4	0	4	12	4
hospitalgowns designer patient hospital gowns surgical scrub caps bouffant patient hospital gowns scrub surgical caps bouffant hats stethoscope covers colorful quality comfortable design health	health	hospitalgowns designer patient hospital gowns surgical scrub caps bouffant patient hospital gowns scrub surgical caps bouffant hats stethoscope covers colorful quality comfortable design health	0	0	2	3	5	2	0	4	2	6	5	10	8	4	10	0	2	0	4
pediatrics paediatrics radiology pediatric paediatric patient education content virtual hospital health care content	health	pediatrics paediatrics radiology pediatric paediatric patient education content virtual hospital health care content	0	0	2	3	5	2	0	4	2	6	5	10	6	4	4	0	2	0	4
welcome tour patientsimulations virtual hospital patient simulations	health	tour patientsimulations virtual hospital patient simulations	0	0	2	3	5	2	0	4	2	10	5	10	8	4	4	0	4	0	4
health state nysdoh hospital english rights hospital patient york rights hospital patient york	health	health nysdoh hospital english rights hospital patient york rights hospital patient york	0	0	2	3	5	2	0	4	2	6	5	10	6	4	4	0	2	12	4
patientshospital surgery pain management redding specialty surgical hospital patients surgical hospital hospital surgery redding	health	patientshospital surgery pain management redding specialty surgical hospital patients surgical hospital hospital surgery redding	0	0	2	3	5	2	0	4	2	6	5	10	6	4	10	0	2	0	4
hospitalpatient construction	health	hospitalpatient construction	1	0	1	1	3	4	6	3	9	8	8	1	12	7	2	7	16	5	8
cyberdiet public page cyberdiet cyberdiet cyberdiet msbia lost pounds marathons inspiring story	health	cyberdiet public cyberdiet cyberdiet cyberdiet msbia lost pounds marathons inspiring story	0	2	3	2	2	3	3	8	0	10	5	0	7	12	13	16	16	18	18
dietcoke diet coke diet coke privacy policy map faq coca-cola company diet coke trademark	health	dietcoke diet coke diet coke privacy policy map faq coca cola company diet coke trademark	0	0	2	3	5	2	7	7	0	5	10	2	4	12	13	15	13	14	0
americanheart presenter identifier diet nutrition	health	americanheart presenter identifier diet nutrition	0	0	2	3	5	2	7	7	7	5	10	7	4	4	13	15	4	14	13
webmd content pages evaluate diets webmd reviews america diets diet experts	health	webmd content evaluate diets webmd reviews america diets diet experts	0	0	2	3	5	2	7	7	7	5	10	7	4	10	4	15	13	14	13
dietdirect weight loss diet programs medical protein diet foods protein dietdirect com purchase weight loss diet protein shakes diet drinks diet bars diet pills liquid diet protein supplements	health	dietdirect weight loss diet programs medical protein diet foods protein dietdirect purchase weight loss diet protein shakes diet drinks diet bars diet pills liquid diet protein supplements	0	0	2	3	5	2	7	4	0	5	10	2	4	10	13	15	13	14	0
diet ivillage diet fitness ivillage com diet tips information maintain healthy lifestyle health calculator workout keyboard yoga online chats discussions	health	diet ivillage diet fitness ivillage diet tips maintain healthy lifestyle health calculator workout keyboard yoga online chats discussions	0	0	2	3	5	2	7	7	7	5	10	2	4	10	13	15	13	14	0
ahrq gov qual hospculture patient safety culture surveys hospital survey patient safety culture surveys addressing resident safety culture nursing homes patient safety	health	ahrq gov qual hospculture patient safety culture surveys hospital survey patient safety culture surveys addressing resident safety culture nursing homes patient safety	0	0	2	3	5	2	0	4	2	6	5	10	6	4	4	0	2	0	4
kidshealth parent infections bacterial viral hepatitis hepatitis hepatitis viruses stages hepatitis cause flu-like symptoms	health	kidshealth parent infections bacterial viral hepatitis hepatitis hepatitis viruses stages hepatitis flu symptoms	0	0	2	3	5	2	7	7	7	6	11	7	0	4	10	14	5	15	13
medicalstudent medical student medical school medicine medicalstudent com digital library authoritative medical information students medicine	health	medicalstudent medical student medical school medicine medicalstudent digital library authoritative medical students medicine	0	0	2	3	5	2	0	4	2	4	3	10	6	4	8	0	2	0	4
freemedicaljournals medical journals lists medical journals full-text access web	health	freemedicaljournals medical journals lists medical journals text access web	0	0	2	3	5	2	0	4	2	6	3	10	6	4	4	0	2	0	4
interscience wiley jpages cancer expression function erythropoietin receptors tumors implications erythropoiesis-stimulating agents cancer patients	health	interscience wiley jpages cancer expression function erythropoietin receptors tumors implications erythropoiesis stimulating agents cancer patients	0	0	2	3	5	2	0	4	7	6	11	7	0	4	10	14	5	5	15
wikipedia wiki cancer cancer wikipedia encyclopedia cells damaged repair eliminated apoptosis cancer cells apoptosis multiply unregulated	health	wikipedia wiki cancer cancer wikipedia encyclopedia cells damaged repair eliminated apoptosis cancer cells apoptosis multiply unregulated	0	0	2	3	5	2	7	7	7	6	5	7	0	12	8	14	5	15	13
cancer gov cancertopics cancer topics home page national cancer institute credible comprehensive cancer information national cancer institute	health	cancer gov cancertopics cancer topics national cancer institute credible comprehensive cancer national cancer institute	0	0	2	3	5	2	7	7	7	6	5	7	0	12	8	14	4	15	13
cancer gov comprehensive cancer information national cancer institute national institute health principal agency cancer research	health	cancer gov comprehensive cancer national cancer institute national institute health principal agency cancer	0	0	2	3	5	2	7	7	7	6	5	7	0	12	8	14	4	15	13
cancer american cancer society information resources cancer dedicated helping persons cancer research patient services detection treatment education	health	cancer american cancer society resources cancer dedicated helping persons cancer patient services detection treatment education	0	0	2	3	5	2	7	7	7	6	5	7	0	12	8	14	4	15	13
medicalnewstoday articles vitamin health health canada health canada growing body role vitamin relation health health canada revised	health	medicalnewstoday articles vitamin health health canada health canada growing body role vitamin relation health health canada revised	0	0	2	3	5	2	7	7	7	5	10	7	6	12	4	15	4	14	13
medicinenet script art articlekey guidelines vitamin supplements healthy living healthy living information disease prevention health promotion information vitamin calcium supplements article	health	medicinenet script art articlekey guidelines vitamin supplements healthy living healthy living disease prevention health promotion vitamin calcium supplements article	0	0	2	3	5	2	7	7	7	5	10	7	4	4	4	15	4	14	13
nature news full news nature com excess vitamin harm health health market vitamin supplements relies assumption vitamin levels health benefits precise effect	health	nature news news nature excess vitamin harm health health market vitamin supplements relies assumption vitamin levels health benefits precise	0	0	2	3	5	2	7	7	7	5	10	7	6	12	4	15	4	14	13
sciam article articleid cccaf efe chanid fiction vitamin supplements health americans pour billions dollars supplements year—an investment health money drain	health	sciam article articleid cccaf efe chanid fiction vitamin supplements health americans pour billions dollars supplements investment health money drain	0	0	2	3	5	2	7	4	7	5	10	7	6	12	4	15	4	14	13
nlm nih gov medlineplus vitamins medlineplus vitamins vitamin carotenoids national institutes health national institutes health office dietary supplements vitamin	health	nlm nih gov medlineplus vitamins medlineplus vitamins vitamin carotenoids national institutes health national institutes health office dietary supplements vitamin	0	0	2	3	5	2	7	7	7	6	10	7	6	4	4	15	15	14	13
mayoclinic health supplements dietary supplements vitamin mineral supplements wisely vitamins minerals substances body steady growth function health vitamins minerals	health	mayoclinic health supplements dietary supplements vitamin mineral supplements wisely vitamins minerals substances body steady growth function health vitamins minerals	0	0	2	3	5	2	7	7	7	5	10	7	6	4	4	15	15	14	13
cforyourself cforyourself vitamin optimum health dedicated optimum nutrition disease prevention treatment supplementation vitamin	health	cforyourself cforyourself vitamin optimum health dedicated optimum nutrition disease prevention treatment supplementation vitamin	0	0	2	3	5	2	7	7	7	5	10	7	6	4	4	15	4	14	13
niams nih gov bone vitamin vitamin bone health vitamin health promotes growth immune system reproduction vision research	health	niams nih gov bone vitamin vitamin bone health vitamin health promotes growth immune system reproduction vision	0	0	2	3	5	2	7	7	7	5	10	7	6	4	4	15	15	14	13
horoscopes astrology dailycancer daily overview horoscope cancer astrology com horoscopes astrology astrology com daily weekly monthly love horoscopes chinese astrology celestial insight	health	horoscopes astrology dailycancer daily overview horoscope cancer astrology horoscopes astrology astrology daily weekly monthly love horoscopes chinese astrology celestial insight	0	0	2	2	5	6	1	2	5	5	5	7	0	12	8	14	4	5	13
evitamins buy discount vitamins bodybuilding supplements skin care children calcium supplements childs health shop top-rated daily vitamins vitamin supplements	health	evitamins buy discount vitamins bodybuilding supplements skin care children calcium supplements childs health shop top rated daily vitamins vitamin supplements	0	0	2	3	5	2	7	7	7	5	10	7	6	4	4	15	15	14	13
wholehealthproducts health products llc health products llc world low-cost source top-quality natural health vitamins weight loss women health	health	wholehealthproducts health products llc health products llc low cost source top quality natural health vitamins weight loss women health	0	0	2	3	5	2	7	7	7	5	10	7	6	10	4	15	4	14	13
sciencedaily releases sciencedaily cocoa vitamin health benefits outshine health benefits epicatechin compound cocoa striking rival penicillin anaesthesia public	health	sciencedaily releases sciencedaily cocoa vitamin health benefits outshine health benefits epicatechin compound cocoa striking rival penicillin anaesthesia public	0	0	2	3	5	2	7	7	7	5	10	7	6	12	4	5	4	14	13
sciencedaily releases sciencedaily discovery vitamin health benefits researchers linus pauling institute oregon university discovery vitamin functions human body	health	sciencedaily releases sciencedaily discovery vitamin health benefits researchers linus pauling institute oregon university discovery vitamin functions human body	0	0	2	3	5	2	7	7	7	5	10	7	6	12	4	5	4	14	13
mitamins vitamins nutritional supplements health mitamins authoritative health information vitamins nutritional supplements custom vitamins nutritional supplements health	health	mitamins vitamins nutritional supplements health mitamins authoritative health vitamins nutritional supplements custom vitamins nutritional supplements health	0	0	2	3	5	2	7	7	7	5	10	7	6	4	4	15	15	14	13
vitamins supplements vitamins health supplements herbal supplements vitamin nutritional information vitamin supplements herbal supplements minerals amino acids hormones vitamin vitamin vitamin vitamin	health	vitamins supplements vitamins health supplements herbal supplements vitamin nutritional vitamin supplements herbal supplements minerals amino acids hormones vitamin vitamin vitamin vitamin	0	0	2	3	5	2	7	7	7	5	10	7	6	4	4	15	15	14	13
acu cell vitc vitamin requirements health benefits overdose deficiency covers dri rda overdose toxicity optimal intake history vitamin demonstrates clinical effects ascorbic acid	health	acu cell vitc vitamin requirements health benefits overdose deficiency covers dri rda overdose toxicity optimal intake history vitamin demonstrates clinical effects ascorbic acid	0	0	2	3	5	2	7	7	7	5	10	7	4	12	4	15	15	14	13
nih gov ccc supplements vitamin mineral supplement sheets health professionals consumers credible information thoughtful decisions eating healthful diet vitamin mineral	health	nih gov ccc supplements vitamin mineral supplement sheets health professionals consumers credible thoughtful decisions eating healthful diet vitamin mineral	0	0	2	3	5	2	7	7	7	5	10	7	6	4	4	15	15	14	13
vitaminshoppe vitamins health supplements vitamin nutrition shop selection vitamin nutrition health supplements vitamins prices vitaminshoppe com	health	vitaminshoppe vitamins health supplements vitamin nutrition shop selection vitamin nutrition health supplements vitamins prices vitaminshoppe	0	0	2	3	5	2	7	7	7	5	10	7	6	4	4	15	15	14	13
hsph harvard edu nutritionsource vitamins vitamins nutrition source harvard school public health harvard school public health nutrition research covers information fiber fats calcium carbohydrates eggs nutritional pyramids	health	hsph harvard nutritionsource vitamins vitamins nutrition source harvard school public health harvard school public health nutrition covers fiber fats calcium carbohydrates eggs nutritional pyramids	0	0	2	3	5	2	7	8	5	4	1	7	7	9	10	5	16	14	11
nutrasanus natural health herbal vitamin nutritional supplements nutrasanus natural health care products herbal vitamin nutritional supplements healthier life	health	nutrasanus natural health herbal vitamin nutritional supplements nutrasanus natural health care products herbal vitamin nutritional supplements healthier life	0	0	2	3	5	2	7	7	7	5	10	7	6	4	4	15	15	14	13
helpguide mental learning disabilities learning disabilities causes symptoms diagnosis learning disabilities guide parents teachers help students learning disability covers causes getting	health	helpguide mental learning disabilities learning disabilities symptoms diagnosis learning disabilities guide parents teachers students learning disability covers	0	0	2	3	5	2	7	7	7	6	3	11	8	4	10	5	5	15	15
nihseniorhealth gov alzheimersdisease symptoms nihseniorhealth alzheimer disease symptoms diagnosis symptoms diagnosis photo hand temple click enlarge click image enlarge alzheimer disease	health	nihseniorhealth gov alzheimersdisease symptoms nihseniorhealth alzheimer disease symptoms diagnosis symptoms diagnosis photo hand temple click enlarge click image enlarge alzheimer disease	0	0	2	3	5	2	7	7	7	6	11	7	0	12	10	14	5	15	13
cdc gov agent smallpox diagnosis cdc smallpox diagnosis evaluation signs symptoms information smallpox diagnosis media clinicians health professionals cdc emergency preparedness	health	cdc gov agent smallpox diagnosis cdc smallpox diagnosis evaluation signs symptoms smallpox diagnosis media clinicians health professionals cdc emergency preparedness	0	0	2	3	5	2	7	7	7	6	11	7	0	4	10	14	5	15	13
healthnutvitamin health nut vitamin home page health nut vitamin customers healthy advice	health	healthnutvitamin health nut vitamin health nut vitamin customers healthy advice	0	0	2	3	5	2	7	7	7	5	10	7	4	4	4	15	4	14	13
nlm nih gov medlineplus cancer medlineplus cancer cancer cells building blocks body body cells cells die	health	nlm nih gov medlineplus cancer medlineplus cancer cancer cells building blocks body body cells cells die	0	0	2	3	5	2	7	7	7	6	5	7	0	12	10	14	5	15	13
cancer about cancer cancer resource symptoms cancer causes cancer cancer treatment	health	cancer cancer cancer resource symptoms cancer cancer cancer treatment	0	0	2	3	5	2	7	7	7	6	5	7	0	12	8	14	4	15	13
webmd cancer webmd cancer health center cancer information cancer diagnosed people in-depth cancer information causes symptoms prevention	health	webmd cancer webmd cancer health center cancer cancer diagnosed people depth cancer symptoms prevention	0	0	2	3	5	2	7	7	7	6	5	7	0	12	10	14	4	15	13
nuance naturallyspeaking medical nuance dragon naturallyspeaking medical dragon naturallyspeaking medical healthcare professionals clinical instantly fraction cost manual	health	nuance naturallyspeaking medical nuance dragon naturallyspeaking medical dragon naturallyspeaking medical healthcare professionals clinical instantly fraction cost manual	0	0	2	3	5	2	0	4	2	6	3	7	6	12	8	0	2	0	4
medlineplus gov medlineplus health information national library medicine health information national library medicine access medline health topics medical dictionaries directories publications	health	medlineplus gov medlineplus health national library medicine health national library medicine access medline health topics medical dictionaries directories publications	0	0	2	3	5	2	7	7	7	6	3	7	6	4	4	0	15	0	4
medmatrix medical matrix guide internet clinical medicine resources materials reproduced copied stored computer apart personal web browser operation written permission medical	health	medmatrix medical matrix guide internet clinical medicine resources materials reproduced copied stored computer personal web browser operation written permission medical	0	0	2	3	5	2	0	4	2	6	3	11	8	4	4	0	2	0	13
medmatrix reg login medical matrix	health	medmatrix reg login medical matrix	0	0	2	3	5	2	0	4	1	6	3	0	8	4	4	0	2	0	13
nature news channels medicalresearch news nature com medical research channel science news self-made billionaire serial entrepreneur medical device biotech ventures mann exemplary philanthropy	health	nature news channels medicalresearch news nature medical channel science news billionaire serial entrepreneur medical device biotech ventures mann exemplary philanthropy	0	0	2	3	5	2	7	4	7	5	10	7	0	12	4	14	4	14	15
ama assn ama american medical association home page journals research medical ethics membership information	health	ama assn ama american medical association journals medical ethics membership	0	0	2	3	5	2	0	4	2	6	3	10	6	4	4	0	2	0	4
healthline healthline health search engine medical information search engine focused consumer health care medical information	health	healthline healthline health search engine medical search engine focused consumer health care medical	0	0	2	3	5	0	7	7	7	6	3	7	6	4	4	0	4	0	4
online medical dictionary medical dictionary online- medical -dictionary org online medical dictionary medical terminology definitions drugs abbreviations equipment devices medical	health	online medical dictionary medical dictionary online medical dictionary org online medical dictionary medical terminology definitions drugs abbreviations equipment devices medical	0	0	2	3	5	2	0	7	7	6	3	7	0	3	10	0	5	0	15
cancerweb ncl omd on-line medical dictionary on-line medical dictionary searchable dictionary medicine fields	health	cancerweb ncl omd medical dictionary medical dictionary searchable dictionary medicine fields	0	0	2	3	5	2	0	7	7	6	3	0	0	3	10	10	5	0	15
mwsearch medical world search tool query search engines discussion forum medical spelling drug acronym devices	health	mwsearch medical search tool query search engines discussion forum medical spelling drug acronym devices	1	0	2	3	5	0	0	7	2	6	3	10	0	4	8	0	2	0	15
libraryspot medical medical reference medical dictionaries health information medical information libraryspot com medem medical library medical library link directory mayoclinic com mayo directory health	health	libraryspot medical medical reference medical dictionaries health medical libraryspot medem medical library medical library link directory mayoclinic mayo directory health	0	0	2	3	5	2	7	7	7	6	3	7	6	4	4	0	2	0	4
wikipedia wiki medicine medicine wikipedia encyclopedia medical profession social occupational structure medicine medical professionals shorthand	health	wikipedia wiki medicine medicine wikipedia encyclopedia medical profession social occupational structure medicine medical professionals shorthand	0	0	2	3	5	2	0	4	2	6	3	10	6	4	8	5	2	0	4
medterms medical dictionary definitions medical online medical dictionary glossary medical definitions	health	medterms medical dictionary definitions medical online medical dictionary glossary medical definitions	0	0	2	3	5	2	0	4	7	6	3	7	0	3	10	0	5	0	15
medicinenet health medical information doctors medicinenet com patient focused covering conditions diseases tests procedures medical dictionary	health	medicinenet health medical doctors medicinenet patient focused covering conditions diseases tests procedures medical dictionary	0	0	2	3	5	2	7	7	7	6	3	7	0	4	10	14	4	0	13
medi cal gov medi-cal home companion guide updates health care payment advice data specifications professional medical data specifications	health	medi cal gov medi cal companion guide updates health care payment advice data specifications professional medical data specifications	1	0	2	3	5	2	0	4	2	6	10	5	6	4	4	0	2	0	4
nlm nih gov medlineplus mplusdictionary medlineplus medical dictionary medical dictionary medical dictionary word spelling letters	health	nlm nih gov medlineplus mplusdictionary medlineplus medical dictionary medical dictionary medical dictionary word spelling letters	0	0	2	3	5	2	0	7	7	6	3	7	0	4	10	0	5	0	15
nlm nih gov medlineplus encyclopedia medlineplus medical encyclopedia medical encyclopedia articles diseases tests symptoms injuries surgeries	health	nlm nih gov medlineplus encyclopedia medlineplus medical encyclopedia medical encyclopedia articles diseases tests symptoms injuries surgeries	0	0	2	3	5	2	7	7	7	6	3	7	0	4	10	14	5	0	13
webmd webmd information health leading source trustworthy timely health medical news information credible health information supportive community	health	webmd webmd health leading source trustworthy timely health medical news credible health supportive community	0	0	2	3	5	2	7	7	7	6	5	7	0	4	4	14	4	14	13
msnbc msn cancer news information cancer news cancer news information msnbc com cancer news headlines drug treatments medical studies findings	health	msnbc msn cancer news cancer news cancer news msnbc cancer news headlines drug treatments medical studies findings	0	0	2	3	5	2	7	7	7	6	5	7	0	12	4	14	4	15	13
nature nrc home nature reviews cancer features scientific review articles oriented topics	health	nature nrc nature reviews cancer features scientific review articles oriented topics	0	0	2	3	5	2	7	4	7	5	10	2	6	4	4	15	4	14	4
cdc gov cancer cancer cdc leader nationwide cancer prevention control national organizations health agencies key	health	cdc gov cancer cancer cdc leader nationwide cancer prevention control national organizations health agencies key	0	0	2	3	5	2	7	7	7	6	5	7	0	4	8	14	4	15	13
wikipedia wiki cancer constellation cancer constellation wikipedia encyclopedia cancer dim resemble crab lies gemini west leo east lynx north canis	health	wikipedia wiki cancer constellation cancer constellation wikipedia encyclopedia cancer dim resemble crab lies gemini west leo east lynx north canis	0	0	2	2	5	6	1	2	5	5	5	7	0	12	8	14	5	5	13
nlm nih gov medlineplus ency article medlineplus medical encyclopedia cancer cancer grows cells body cells multiply body die body doesn cancer	health	nlm nih gov medlineplus ency article medlineplus medical encyclopedia cancer cancer grows cells body cells multiply body die body doesn cancer	0	0	2	3	5	2	7	7	7	6	11	7	0	12	10	14	5	15	13
sciencedaily news health medicine cancer sciencedaily cancer news medical research risk factors cancer cancer symptoms treatments updated daily	health	sciencedaily news health medicine cancer sciencedaily cancer news medical risk factors cancer cancer symptoms treatments updated daily	0	0	2	3	5	2	7	7	7	6	5	7	0	12	8	14	4	15	13
mayoclinic health cancer cancer center mayoclinic com cancer center comprehensive information cancer treatment cancer research cancer	health	mayoclinic health cancer cancer center mayoclinic cancer center comprehensive cancer treatment cancer cancer	0	0	2	3	5	2	7	7	7	6	5	7	0	12	8	14	4	15	13
oncolink cancer information research treatment oncolink web massive information resource comprehensive cancer center philadelphia pennsylvania	health	oncolink cancer treatment oncolink web massive resource comprehensive cancer center philadelphia pennsylvania	0	0	2	3	5	2	7	7	7	6	5	7	0	12	8	14	4	15	13
astrology yahoo astrology general dailyoverview cancer yahoo astrology cancer sign aries taurus gemini cancer leo virgo libra scorpio sagittarius capricorn aquarius pisces	health	astrology yahoo astrology dailyoverview cancer yahoo astrology cancer sign aries taurus gemini cancer leo virgo libra scorpio sagittarius capricorn aquarius pisces	0	0	2	2	5	6	1	2	5	5	5	7	0	12	8	14	4	5	13
topics nytimes top news health diseasesconditionsandhealthtopics cancer index inline nyt classifier cancer health york science reporter donald mcneil explores research blood test human papillomavirus causes cervical cancer	health	topics nytimes top news health diseasesconditionsandhealthtopics cancer inline nyt classifier cancer health york science reporter donald mcneil explores blood test human papillomavirus cervical cancer	0	0	2	3	5	2	7	7	7	5	10	7	0	4	4	14	4	14	13
nature cancer cancer nature com cancer articles jobs information service access news articles reports research activity	health	nature cancer cancer nature cancer articles jobs service access news articles reports activity	0	0	2	3	5	2	7	4	7	6	5	7	0	4	4	14	4	14	13
fitness gov president council physical fitness sports promotes encourages motivates americans ages physically participate sports president	health	fitness gov president council physical fitness sports promotes encourages motivates americans ages physically participate sports president	0	0	2	1	5	6	3	4	0	5	10	10	6	10	1	15	13	14	4
arthritis about rheumatoidarthritis rheumatoid arthritis cause diagnosis symptoms treatment rheumatoid arthritis cause diagnosis symptoms treatment rheumatoid arthritis cause diagnosis symptoms treatment rheumatoid arthritis cure aggressive treatment rheumatoid arthritis	health	arthritis rheumatoidarthritis rheumatoid arthritis diagnosis symptoms treatment rheumatoid arthritis diagnosis symptoms treatment rheumatoid arthritis diagnosis symptoms treatment rheumatoid arthritis cure aggressive treatment rheumatoid arthritis	0	0	2	3	5	2	7	7	7	6	3	11	0	3	10	14	5	15	13
lafitness fitness fitness life fitness exercise options basketball racquetball swimming indoor cycling weights cardio personal training	health	lafitness fitness fitness life fitness exercise options basketball racquetball swimming indoor cycling weights cardio personal training	0	1	0	4	0	6	7	3	1	5	10	2	5	10	13	15	13	10	0
sciencedaily news health medicine fitness sciencedaily fitness news physical fitness exercise check articles webcasts physical fitness weight lifting programs methods	health	sciencedaily news health medicine fitness sciencedaily fitness news physical fitness exercise check articles webcasts physical fitness weight lifting programs methods	0	0	2	3	5	2	7	7	7	5	10	7	6	10	13	15	4	14	0
things tag physical check goals tagged physical check-up physical check-up goal tagged physical check-up physical people physical check-up flickr physical check-up del icio	health	tag physical check goals tagged physical check physical check goal tagged physical check physical people physical check flickr physical check del icio	0	0	2	3	5	0	0	4	2	10	10	0	6	3	13	5	2	5	10
chinadaily content yang physical check-up flawless yang physical check-up flawless china daily yang liwei china astronaut physical health historic	health	chinadaily content yang physical check flawless yang physical check flawless china daily yang liwei china astronaut physical health historic	0	0	2	3	3	0	0	4	2	10	10	0	6	3	13	5	2	5	10
pcworld article article world linkbot pro physical checkup web sites upgrade watchfire tester features running smoothly	health	pcworld article article linkbot pro physical checkup web sites upgrade watchfire tester features running smoothly	0	0	2	4	3	0	0	4	2	10	10	0	6	7	4	3	15	10	10
learnoutloud sale section education and professional medical physical american checkup physical american checkup mcmanus audio book wild ride dark heart american health health care plus sex drugs stem-cell wars	health	learnoutloud sale education professional medical physical american checkup physical american checkup mcmanus audio book wild ride dark heart american health health care sex drugs stem cell wars	0	0	2	3	5	0	0	4	2	6	10	7	6	4	13	5	2	5	4
bookslut nonfiction bookslut physical american checkup mcmanus reads physical story hard-living happily married middle-aged american author ‘executive checkup mayo	health	bookslut nonfiction bookslut physical american checkup mcmanus reads physical story hard living happily married middle aged american author executive checkup mayo	0	0	2	3	5	0	0	4	2	10	10	0	9	7	13	5	2	5	10
bbcaudiobooksamerica productdetails physical span class subtitle american checkup span physical mcmanus patrick frederic	health	bbcaudiobooksamerica productdetails physical span class subtitle american checkup span physical mcmanus patrick frederic	0	0	2	3	3	0	0	4	6	10	10	0	9	7	13	5	15	5	10
vibhavadi events detail annual physical check vibhavadi hospital bangkok annual physical check vibhavadi hospital bangkok	health	vibhavadi events detail annual physical check vibhavadi hospital bangkok annual physical check vibhavadi hospital bangkok	0	0	2	3	5	0	0	4	2	10	3	10	6	4	8	5	2	5	10
amazon physical american checkup james mcmanus amazon com physical american checkup books mcmanus amazon com physical american checkup books mcmanus patrick frederic mcmanus patrick frederic	health	amazon physical american checkup james mcmanus amazon physical american checkup books mcmanus amazon physical american checkup books mcmanus patrick frederic mcmanus patrick frederic	0	0	2	3	3	0	0	4	6	10	10	0	9	7	13	5	15	5	10
blackwell synergy doi physical check-up blood data analysis thai elderly keywords blood data analysis chula mental test geriatric depression scale physical check-up thailand aging population	health	blackwell synergy doi physical check blood data analysis thai elderly keywords blood data analysis chula mental test geriatric depression scale physical check thailand aging population	0	0	2	3	5	2	0	7	7	6	10	7	0	4	10	5	5	14	15
city saitama education kenshin physical checkup school notification physical checkup school parents	health	city saitama education kenshin physical checkup school notification physical checkup school parents	0	0	2	3	5	0	0	4	2	10	3	10	6	4	13	5	2	5	10
bjhealthcare checkup physical checkup ，clinical services bayley jackson medical center bayley jackson medical center physical checkup clinical services chaoyang district beijing	health	bjhealthcare checkup physical checkup services bayley jackson medical center bayley jackson medical center physical checkup clinical services chaoyang district beijing	0	0	2	3	5	0	0	4	2	10	3	10	6	4	4	5	2	5	4
ncbi nlm nih gov entrez query fcgi cmd retrieve pubmed list uids dopt abstract screening diseases elderly persons correlation background effectiveness physical checkup program screening diseases elderly correlation chief complaints	health	ncbi nlm nih gov entrez query fcgi cmd retrieve pubmed list uids dopt abstract screening diseases elderly persons correlation background effectiveness physical checkup program screening diseases elderly correlation chief complaints	0	0	2	3	5	0	0	4	7	6	3	7	0	4	10	0	15	5	15
josmc pipermail mednews august mednews nytimes com article annual physical checkup mednews nytimes com article annual physical checkup ritual rockdoc aol com rockdoc aol com edt	health	josmc pipermail mednews august mednews nytimes article annual physical checkup mednews nytimes article annual physical checkup ritual rockdoc aol rockdoc aol edt	0	0	2	3	5	0	0	4	2	10	10	10	6	7	4	5	2	5	10
content karger produktedb produkte aktion showpdf artikelnr produktnr ausgabe filename screening diseases elderly persons correlation ing effective physical checkup program analyzed report physical checkup served ‘chief complaints	health	content karger produktedb produkte aktion showpdf artikelnr produktnr ausgabe filename screening diseases elderly persons correlation ing effective physical checkup program analyzed report physical checkup served chief complaints	0	0	2	3	5	0	0	4	2	6	3	7	0	4	10	0	15	5	15
english sina physical checkup taikonauts english sina com physical checkup taikonauts sina english doctor condition physical checkup landing	health	english sina physical checkup taikonauts english sina physical checkup taikonauts sina english doctor condition physical checkup landing	0	0	2	3	5	0	0	4	2	10	10	0	6	4	13	5	2	5	10
aahperd naspe files pechecklist school physical education checkup answered yes questions physical education check-up school qualify naspe stars	health	aahperd naspe files pechecklist school physical education checkup answered questions physical education check school qualify naspe stars	0	0	2	3	5	0	0	4	2	10	3	10	6	3	13	5	2	5	4
query nytimes gst fullpage res sec health pagewanted all annual physical checkup ritual york visit gold-plated executive physical companies executives	health	query nytimes gst fullpage res health pagewanted annual physical checkup ritual york visit gold plated executive physical companies executives	0	0	2	3	5	0	0	4	2	10	10	10	6	7	4	5	2	5	10
statcan english concepts health physcheckup physical check-up proxy interview physical check-ups physical check-up health	health	statcan english concepts health physcheckup physical check proxy interview physical check physical check health	0	0	2	3	5	0	0	4	2	10	10	0	6	4	13	5	2	5	4
webindia health fitness check health staying healthy checkups factors routine physical check medical history prior physical examination doctor diet exercise	health	webindia health fitness check health staying healthy checkups factors routine physical check medical history prior physical examination doctor diet exercise	0	0	2	3	5	2	7	7	7	5	10	2	6	10	13	15	4	14	0
centerwatch patient drugs druglist listing approved drug therapies fda approved drug therapies archives centerwatch clinical trials listing service	health	centerwatch patient drugs druglist listing approved drug therapies fda approved drug therapies archives centerwatch clinical trials listing service	0	0	2	3	5	2	0	7	7	6	3	11	8	4	4	0	15	0	13
gslc genetics utah edu units stemcells sctoday stem cell therapies best-known stem cell therapy bone marrow transplant treat leukemia cancer	health	gslc genetics utah units stemcells sctoday stem cell therapies stem cell therapy bone marrow transplant treat leukemia cancer	0	0	2	3	5	2	0	4	2	6	10	7	6	4	8	5	2	5	4
mentalhealth samhsa gov publications allpubs ken default traditional therapies national mental health information center document description methods mental health professionals	health	mentalhealth samhsa gov publications allpubs ken default traditional therapies national mental health center document description methods mental health professionals	0	0	2	3	5	2	7	7	2	6	3	11	6	4	4	14	15	0	13
cancer gov cancertopics biologicaltherapy biological therapy national cancer institute introduction biological therapy help patients prepare cancer treatment managing effects	health	cancer gov cancertopics biologicaltherapy biological therapy national cancer institute introduction biological therapy patients prepare cancer treatment managing effects	0	0	2	3	5	2	7	7	7	6	3	7	0	12	8	14	4	15	13
iahe therapies cst iahe craniosacral therapy somatoemotional release ser therapeutic process expands principles craniosacral therapy help rid mind body residual effects trauma	health	iahe therapies cst iahe craniosacral therapy somatoemotional release ser therapeutic process expands principles craniosacral therapy rid mind body residual effects trauma	0	0	2	3	5	2	0	4	2	5	3	11	8	3	2	5	15	5	15
therapies therapy courses qualifying courses therapies aromatherapy acupressure massage reiki bucks england	health	therapies therapy courses qualifying courses therapies aromatherapy acupressure massage reiki bucks england	0	0	2	3	5	2	0	4	2	10	3	11	6	3	2	5	2	5	4
cancerguide alternative cancerguide complementary therapies section home therapies information unique	health	cancerguide alternative cancerguide complementary therapies therapies unique	0	0	2	3	5	2	0	4	2	6	3	11	6	3	2	5	2	5	4
intl elsevierhealth journals ctim complementary therapies medicine complementary therapies medicine valuable resource information critical guidance field complementary therapies	health	intl elsevierhealth journals ctim complementary therapies medicine complementary therapies medicine valuable resource critical guidance field complementary therapies	0	0	2	3	5	2	0	4	2	6	3	11	6	3	4	0	2	5	4
nlm nih gov medlineplus canceralternativetherapies medlineplus cancer therapies nih organization research cancer therapies national cancer institute cancer therapies	health	nlm nih gov medlineplus canceralternativetherapies medlineplus cancer therapies nih organization cancer therapies national cancer institute cancer therapies	0	0	2	3	5	2	7	7	7	6	5	7	0	12	4	14	5	15	13
amazon physical american checkup james mcmanus amazon com physical american checkup books mcmanus amazon com physical american checkup books mcmanus mcmanus	health	amazon physical american checkup james mcmanus amazon physical american checkup books mcmanus amazon physical american checkup books mcmanus mcmanus	0	0	2	3	3	0	0	4	6	10	10	0	9	7	13	5	15	5	10
california rathbone pmth postmodern therapies news pmth stands postmodern therapies therapists graduate students scholars	health	california rathbone pmth postmodern therapies news pmth stands postmodern therapies therapists graduate students scholars	0	0	2	3	1	2	0	4	2	10	3	10	6	3	8	5	2	5	4
nutrition gov nutrition gov homepage federal guide access government web sites reliable accurate information nutrition dietary guidance	health	nutrition gov nutrition gov homepage federal guide access government web sites reliable accurate nutrition dietary guidance	0	0	2	3	5	2	7	7	7	4	10	7	6	4	4	15	15	14	13
nutrition american society nutrition publication american academy nutritional sciences issues online subscription information	health	nutrition american society nutrition publication american academy nutritional sciences issues online subscription	0	0	2	3	5	2	7	7	7	6	1	7	6	4	4	15	15	14	13
nlm nih gov medlineplus drugabuse medlineplus drug abuse resource links substance abuse resources national library medicine	health	nlm nih gov medlineplus drugabuse medlineplus drug abuse resource links substance abuse resources national library medicine	0	0	2	3	5	2	7	7	7	6	3	11	8	4	4	15	15	0	13
topix news drugs drugs news topix news drugs continually updated net	health	topix news drugs drugs news topix news drugs continually updated net	0	0	2	3	5	2	7	7	7	6	11	7	8	4	8	14	7	15	15
usdoj gov dea drug enforcement administration home lead agency domestic enforcement federal drug laws coordinating pursuing drug investigations abroad links programs	health	usdoj gov dea drug enforcement administration lead agency domestic enforcement federal drug laws coordinating pursuing drug investigations abroad links programs	0	0	2	3	5	2	7	7	7	4	3	11	8	7	4	5	15	0	13
who int druginformation drug information issues drug information portable document format pdf pdf reader installed computer	health	int druginformation drug issues drug portable document format pdf pdf reader installed computer	1	0	2	3	5	0	7	7	7	6	11	11	8	4	4	0	15	0	13
fda gov food drug administration home page home page food drug administration fda	health	fda gov food drug administration food drug administration fda	0	0	2	3	5	2	7	7	7	6	3	11	8	7	4	15	15	0	13
nlm nih gov medlineplus druginformation medlineplus drugs supplements guide prescription over-the-counter medications united pharmacopeia	health	nlm nih gov medlineplus druginformation medlineplus drugs supplements guide prescription counter medications united pharmacopeia	0	0	2	3	5	2	7	7	7	6	3	11	0	4	4	15	15	0	13
nida nih gov national institute drug abuse mission national institute drug abuse nida lead nation power science bear drug abuse addiction	health	nida nih gov national institute drug abuse mission national institute drug abuse nida lead nation power science bear drug abuse addiction	0	0	2	3	5	2	7	7	7	6	3	11	8	7	4	5	15	0	15
rxlist rxlist internet drug index prescription drugs medications prescription drug information consumers medical health professionals drugs effects interactions	health	rxlist rxlist internet drug prescription drugs medications prescription drug consumers medical health professionals drugs effects interactions	0	0	2	3	5	2	7	7	7	6	3	11	8	7	4	15	15	0	13
drugs prescription drug information effects interactions drugs com online drug information format information clinical trials news drug interactions pill identifier	health	drugs prescription drug effects interactions drugs online drug format clinical trials news drug interactions pill identifier	0	0	2	3	5	2	7	7	7	6	3	11	8	7	4	15	15	0	13
wikipedia wiki medication medication wikipedia encyclopedia blockbuster drug article section medication drug cure symptoms	health	wikipedia wiki medication medication wikipedia encyclopedia blockbuster drug article medication drug cure symptoms	0	0	2	3	5	2	7	7	7	6	3	7	8	7	8	14	15	0	13
wikipedia wiki drug drug wikipedia encyclopedia drug chemical biological substance synthetic non-synthetic organism body alter functions	health	wikipedia wiki drug drug wikipedia encyclopedia drug chemical biological substance synthetic synthetic organism body alter functions	0	0	2	3	5	2	7	7	7	6	3	7	8	7	8	5	15	0	13
exhibits pacsci nutrition nutrition cafe nutrition sleuth play grab-a-grape game build meal have-a-bite cafe optional flash version	health	exhibits pacsci nutrition nutrition cafe nutrition sleuth play grab grape game build meal bite cafe optional flash version	0	0	2	3	5	2	7	8	7	5	10	2	4	10	13	15	13	14	0
topics nytimes top news health diseasesconditionsandhealthtopics diet index inline nyt classifier diet nutrition health food companies agreed advertising products nutritional standards children	health	topics nytimes top news health diseasesconditionsandhealthtopics diet inline nyt classifier diet nutrition health food companies agreed advertising products nutritional standards children	0	0	2	3	5	2	7	7	7	5	10	7	6	4	4	15	4	14	13
mypyramid gov mypyramid gov united department agriculture home nutrition calories stay daily calorie mypyramid food patterns designed public ages	health	mypyramid gov mypyramid gov united department agriculture nutrition calories stay daily calorie mypyramid food patterns designed public ages	0	0	2	3	5	2	7	4	0	5	10	2	4	10	13	15	13	14	0
arborcom nutrition arbor nutrition guide directory resources food science clinical nutrition applied nutrition production consumption food	health	arborcom nutrition arbor nutrition guide directory resources food science clinical nutrition applied nutrition production consumption food	0	0	2	3	5	2	7	7	7	5	10	7	4	10	4	15	15	14	0
nutrition nutrition com nutrition resource nutrition information keyword search help cholesterol daily fiber proteins	health	nutrition nutrition nutrition resource nutrition keyword search cholesterol daily fiber proteins	0	0	2	3	5	2	7	7	7	5	10	7	4	10	4	15	4	14	13
nytimes pages health nutrition index fitness nutrition health news york breaking news health news fitness nutrition obesity diets health food diabetes heart disease cancer cholesterol	health	nytimes health nutrition fitness nutrition health news york breaking news health news fitness nutrition obesity diets health food diabetes heart disease cancer cholesterol	0	0	2	3	5	2	7	7	7	5	10	7	6	10	4	15	4	14	13
hsph harvard edu nutritionsource nutrition source harvard school public health harvard school public health nutrition research covers information fiber fats calcium carbohydrates eggs nutritional pyramids	health	hsph harvard nutritionsource nutrition source harvard school public health harvard school public health nutrition covers fiber fats calcium carbohydrates eggs nutritional pyramids	0	0	2	3	5	2	7	8	5	4	1	7	7	9	10	5	16	14	11
who int nutrition nutrition nutrition input foundation health development interaction infection malnutrition well-documented	health	int nutrition nutrition nutrition input foundation health development interaction infection malnutrition documented	0	0	2	3	5	2	7	7	7	6	10	7	6	4	4	15	15	14	13
nutritionexplorations kids nutrition explorations kids berry gang pyramid cafe learn building healthy body features games coloring pages recipes contest kids panel	health	nutritionexplorations kids nutrition explorations kids berry gang pyramid cafe learn building healthy body features games coloring recipes contest kids panel	0	0	2	3	5	2	7	7	7	5	10	2	4	10	13	15	13	14	0
nutritionexplorations nutrition explorations fun teach learn nutrition education information resources teachers parents kids guides school programs menu developed national dairy	health	nutritionexplorations nutrition explorations fun teach learn nutrition education resources teachers parents kids guides school programs menu developed national dairy	0	0	2	3	5	2	7	7	7	6	10	11	4	10	13	15	13	14	0
nutritiondata nutritiondata com nutritiondata nutrition calorie counter nutrition calorie counter calculator promotes healthy eating telling foods eat	health	nutritiondata nutritiondata nutritiondata nutrition calorie counter nutrition calorie counter calculator promotes healthy eating telling foods eat	0	0	2	3	5	2	7	7	0	5	10	2	4	10	13	15	13	14	0
cdc gov nutrition nutrition introduction dnpao cdc healthy weight fruits vegetables bone health iron deficiency tips resources	health	cdc gov nutrition nutrition introduction dnpao cdc healthy weight fruits vegetables bone health iron deficiency tips resources	0	0	2	3	5	2	7	7	7	5	10	7	4	10	13	15	4	14	0
nutrition about nutrition nutrition information help nutrition weight loss weight health	health	nutrition nutrition nutrition nutrition weight loss weight health	0	0	2	3	5	2	7	7	7	5	10	2	4	10	13	15	13	14	0
sciencedaily news health medicine nutrition sciencedaily nutrition news answers questions nutrition body weight herbal nutritional supplements role diet maintaining health	health	sciencedaily news health medicine nutrition sciencedaily nutrition news answers questions nutrition body weight herbal nutritional supplements role diet maintaining health	0	0	2	3	5	2	7	7	7	5	10	7	6	4	4	15	4	14	13
nlm nih gov medlineplus nutrition medlineplus nutrition center nutrition policy promotion links pdf grains nutrition fiber fat mayo foundation medical education	health	nlm nih gov medlineplus nutrition medlineplus nutrition center nutrition policy promotion links pdf grains nutrition fiber fat mayo foundation medical education	0	0	2	3	5	2	7	7	7	6	10	7	4	4	4	15	15	14	13
fnic nal usda gov food nutrition information center comprehensive resource government nutrition campaigns programs articles lists links	health	fnic nal usda gov food nutrition center comprehensive resource government nutrition campaigns programs articles lists links	0	0	2	3	5	2	7	7	7	5	10	7	4	4	4	15	15	14	0
wikipedia wiki nutrition nutrition wikipedia encyclopedia encyclopedia article nutrition sections history health food processing longevity lifetstyle policy holistic approaches	health	wikipedia wiki nutrition nutrition wikipedia encyclopedia encyclopedia article nutrition sections history health food processing longevity lifetstyle policy holistic approaches	0	0	2	3	5	2	7	7	0	5	10	2	6	4	13	15	15	14	0
sciencedaily healthology nutrition focusarea nutrition health information nutrition health articles videos nutrition health topics	health	sciencedaily healthology nutrition focusarea nutrition health nutrition health articles videos nutrition health topics	0	0	2	3	5	2	7	7	7	5	10	7	6	10	4	15	4	14	13
ict sagepub integrative cancer therapies access integrative cancer therapies online locations url http intl-ict sagepub com australia brazil china france	health	ict sagepub integrative cancer therapies access integrative cancer therapies online locations url http intl ict sagepub australia brazil china france	0	0	2	3	5	2	0	4	2	6	5	7	6	12	4	7	2	5	17
jilaensherwood acusound acusound international school sound healing holistic therapies acusound international training course sound healing therapy clinical hypnotherapy holistic complementary therapy courses	health	jilaensherwood acusound acusound international school sound healing holistic therapies acusound international training sound healing therapy clinical hypnotherapy holistic complementary therapy courses	0	0	2	3	5	2	0	4	2	10	3	11	6	3	2	5	2	5	4
theamt association meridian energy therapies news articles energy psychology training referrals	health	theamt association meridian energy therapies news articles energy psychology training referrals	0	0	2	3	5	2	0	4	2	5	10	1	6	10	13	15	2	14	0
ucsdnews ucsd edu newsrel health diabetes ucsd team discovers diabetes trigger fatty diet study published journal cell reports discovery molecular link high-fat western-style diet	health	ucsdnews ucsd newsrel health diabetes ucsd team discovers diabetes trigger fatty diet study published journal cell reports discovery molecular link fat western style diet	0	0	2	3	5	2	7	7	7	5	10	7	0	12	4	14	4	14	13
[truncated: 3,283 more rows]
